# Supplementary material for: Repurposing of KLF5 activates a cell cycle signature during the progression from a precursor state to Oesophageal Adenocarcinoma
Source: bioRxiv preprint, doi:10.1101/2020.02.10.941872, version 2 (2020-08-27)
Supplement: Supplementary Table 1 [file 941872_file05.xlsx]

## Sheet: Legend
Table S1. Differentially expressed genes in OAC. (A) Significantly (±1.5x; Q-value < 0.05) differentially expressed genes between BO (n=13) and OAC (n=12) (Maag et al., 2017).

## Sheet: S1 DEGs BO vs OAC 
test_id	gene_id	gene	locus	sample_1	sample_2	status	value_1	value_2	log2(fold_change)	test_stat	p_value	q_value	significant
CSAG1	CSAG1	CSAG1	chrX:151903227-151909518	Barretts	Cancer	OK	0	15.0118	inf	#NAME?	0.0006	0.0157396	yes
MAGEA12	MAGEA12	MAGEA12	chrX:151895977-151903184	Barretts	Cancer	OK	0	2.96825	inf	#NAME?	0.0007	0.0175528	yes
MAGEA3	MAGEA3	MAGEA3	chrX:151934651-151938240	Barretts	Cancer	OK	0.00423701	8.21556	10.9211	0.374311	5e-05	0.00245342	yes
CRABP1	CRABP1	CRABP1	chr15:78632665-78640572	Barretts	Cancer	OK	0.0128892	2.82376	7.77531	0.358723	5e-05	0.00245342	yes
PGA3	PGA3	PGA3	chr11:60970983-60980350	Barretts	Cancer	OK	2.93756	436.517	7.21528	0.836944	0.00015	0.00568375	yes
MUCL1	MUCL1	MUCL1	chr12:55248298-55252174	Barretts	Cancer	OK	0.0209213	2.74744	7.03697	0.329814	0.00025	0.00848321	yes
CHIT1	CHIT1	CHIT1	chr1:203185206-203198860	Barretts	Cancer	OK	0.0663514	4.93078	6.21555	1.37642	0.00325	0.0492592	yes
PGA5	PGA5	PGA5	chr11:61008643-61018929	Barretts	Cancer	OK	0.270141	16.6641	5.94688	1.71475	0.00035	0.0107773	yes
TREM1	TREM1	TREM1	chr6:41242998-41254457	Barretts	Cancer	OK	0.154039	8.62486	5.80713	2.0463	0.00015	0.00568375	yes
IL24	IL24	IL24	chr1:207070787-207095378	Barretts	Cancer	OK	0.12091	5.92291	5.6143	1.1481	5e-05	0.00245342	yes
SPP1	SPP1	SPP1	chr4:88896801-88904563	Barretts	Cancer	OK	1.88559	48.1267	4.67375	2.87533	5e-05	0.00245342	yes
MMP3	MMP3	MMP3	chr11:102654406-102714342	Barretts	Cancer	OK	3.36442	79.9744	4.57111	1.26237	0.0003	0.00960634	yes
FCGR3B	FCGR3B	FCGR3B	chr1:161592987-161601753	Barretts	Cancer	OK	1.05308	22.7785	4.43499	2.18703	5e-05	0.00245342	yes
FPR2	FPR2	FPR2	chr19:52264452-52273779	Barretts	Cancer	OK	0.272621	5.00544	4.19853	1.57294	0.0015	0.0296974	yes
TNFRSF6B	TNFRSF6B	TNFRSF6B	chr20:62289162-62367494	Barretts	Cancer	OK	2.14188	35.4836	4.05021	1.02255	0.0003	0.00960634	yes
PRSS21	PRSS21	PRSS21	chr16:2867163-2871723	Barretts	Cancer	OK	1.0446	15.8184	3.92058	1.60283	0.00015	0.00568375	yes
G0S2	G0S2	G0S2	chr1:209848669-209849735	Barretts	Cancer	OK	2.39795	35.5254	3.88898	2.27629	5e-05	0.00245342	yes
IGF2BP3	IGF2BP3	IGF2BP3	chr7:23349827-23509995	Barretts	Cancer	OK	0.808584	11.1181	3.78137	2.35738	5e-05	0.00245342	yes
STK31	STK31	STK31	chr7:23749785-23872130	Barretts	Cancer	OK	0.816224	11.1006	3.76552	2.09135	5e-05	0.00245342	yes
KCNJ16	KCNJ16	KCNJ16	chr17:68071365-68131746	Barretts	Cancer	OK	0.231553	3.11655	3.75054	1.38854	0.002	0.0354772	yes
SERPINE1	SERPINE1	SERPINE1	chr7:100770369-100782547	Barretts	Cancer	OK	1.05214	11.8665	3.49551	2.18879	5e-05	0.00245342	yes
CYR61	CYR61	CYR61	chr1:86046443-86049648	Barretts	Cancer	OK	1.25396	13.6326	3.4425	1.88483	5e-05	0.00245342	yes
MARCO	MARCO	MARCO	chr2:119699744-119752236	Barretts	Cancer	OK	0.186311	2.02212	3.44008	1.0787	0.0021	0.0366787	yes
SELL	SELL	SELL	chr1:169659805-169680843	Barretts	Cancer	OK	1.28758	13.5856	3.39934	2.3803	5e-05	0.00245342	yes
IL1B	IL1B	IL1B	chr2:113587336-113594356	Barretts	Cancer	OK	6.36643	59.4777	3.22379	1.7505	5e-05	0.00245342	yes
FPR1	FPR1	FPR1	chr19:52249022-52255150	Barretts	Cancer	OK	1.93924	17.6634	3.18721	2.01922	5e-05	0.00245342	yes
CSF3R	CSF3R	CSF3R	chr1:36931643-36948915	Barretts	Cancer	OK	0.802091	7.27462	3.18103	2.02362	5e-05	0.00245342	yes
NUP107	NUP107	NUP107	chr12:69080730-69136473	Barretts	Cancer	OK	8.01839	72.1453	3.16952	0.868474	5e-05	0.00245342	yes
MMP9	MMP9	MMP9	chr20:44637546-44645200	Barretts	Cancer	OK	1.46341	12.68	3.11515	1.83239	5e-05	0.00245342	yes
CXCL1	CXCL1	CXCL1	chr4:74735108-74737019	Barretts	Cancer	OK	10.876	93.2686	3.10024	2.45487	5e-05	0.00245342	yes
MNDA	MNDA	MNDA	chr1:158801167-158819270	Barretts	Cancer	OK	4.21033	35.5192	3.07659	1.53058	5e-05	0.00245342	yes
CACNB4	CACNB4	CACNB4	chr2:152689285-152955593	Barretts	Cancer	OK	0.469245	3.54801	2.9186	1.07622	0.00175	0.032836	yes
NRCAM	NRCAM	NRCAM	chr7:107788070-108096841	Barretts	Cancer	OK	0.465763	3.48885	2.90508	1.65855	0.0001	0.00419723	yes
IDO1	IDO1	IDO1	chr8:39771327-39786309	Barretts	Cancer	OK	1.49135	10.9498	2.87621	1.49912	5e-05	0.00245342	yes
CXCL2	CXCL2	CXCL2	chr4:74962753-74964997	Barretts	Cancer	OK	3.16068	22.7189	2.84558	1.75198	5e-05	0.00245342	yes
H19	H19	H19	chr11:2016405-2019065	Barretts	Cancer	OK	4.52243	31.3211	2.79197	1.70652	5e-05	0.00245342	yes
C5AR1	C5AR1	C5AR1	chr19:47813103-47825327	Barretts	Cancer	OK	1.00401	6.91559	2.78408	1.69095	5e-05	0.00245342	yes
EGR1	EGR1	EGR1	chr5:137801180-137805004	Barretts	Cancer	OK	2.29326	15.146	2.72346	1.70033	5e-05	0.00245342	yes
RGS1	RGS1	RGS1	chr1:192544856-192549159	Barretts	Cancer	OK	3.2299	20.7618	2.68437	1.65707	5e-05	0.00245342	yes
PTGS2	PTGS2	PTGS2	chr1:186640943-186649559	Barretts	Cancer	OK	1.90103	11.6461	2.615	1.65276	5e-05	0.00245342	yes
MFAP2	MFAP2	MFAP2	chr1:17300998-17308081	Barretts	Cancer	OK	1.7112	10.2285	2.57951	1.41661	5e-05	0.00245342	yes
HSPA6	HSPA6	HSPA6	chr1:161494035-161496687	Barretts	Cancer	OK	0.5929	3.52695	2.57256	1.28702	5e-05	0.00245342	yes
PLEKHG4	PLEKHG4	PLEKHG4	chr16:67311412-67360661	Barretts	Cancer	OK	0.891846	5.05112	2.50174	1.82464	5e-05	0.00245342	yes
SULF1	SULF1	SULF1	chr8:70378858-70573147	Barretts	Cancer	OK	4.10392	23.1452	2.49564	2.02224	5e-05	0.00245342	yes
APOE	APOE	APOE	chr19:45409038-45412650	Barretts	Cancer	OK	10.1596	56.5963	2.47787	1.83773	5e-05	0.00245342	yes
VNN2	VNN2	VNN2	chr6:133065008-133084598	Barretts	Cancer	OK	2.5305	13.844	2.45176	1.54089	5e-05	0.00245342	yes
CXCL5	CXCL5	CXCL5	chr4:74861358-74864416	Barretts	Cancer	OK	3.28269	17.719	2.43234	1.23469	5e-05	0.00245342	yes
ADAMTS12	ADAMTS12	ADAMTS12	chr5:33527286-33892124	Barretts	Cancer	OK	0.594082	3.14976	2.40651	1.49795	5e-05	0.00245342	yes
MMP12	MMP12	MMP12	chr11:102733463-102745764	Barretts	Cancer	OK	13.2191	69.9439	2.40358	1.50833	5e-05	0.00245342	yes
IGF2	IGF2	IGF2	chr11:2150341-2182439	Barretts	Cancer	OK	2.66462	13.7841	2.371	0.972602	0.002	0.0354772	yes
MYBL2	MYBL2	MYBL2	chr20:42295708-42345122	Barretts	Cancer	OK	5.84642	30.165	2.36725	1.74099	5e-05	0.00245342	yes
SERPINA4	SERPINA4	SERPINA4	chr14:95027782-95036243	Barretts	Cancer	OK	2.40872	12.3127	2.3538	1.43752	5e-05	0.00245342	yes
FCGR2A	FCGR2A	FCGR2A	chr1:161475204-161489360	Barretts	Cancer	OK	8.63365	43.4564	2.33153	1.91551	5e-05	0.00245342	yes
CCL20	CCL20	CCL20	chr2:228678557-228682280	Barretts	Cancer	OK	13.0768	65.7948	2.33096	1.72693	5e-05	0.00245342	yes
FAP	FAP	FAP	chr2:163027199-163100045	Barretts	Cancer	OK	1.02172	5.13238	2.32863	1.45686	5e-05	0.00245342	yes
CCDC150	CCDC150	CCDC150	chr2:197504355-197597530	Barretts	Cancer	OK	0.337458	1.69476	2.3283	1.13437	5e-05	0.00245342	yes
CTSL1	CTSL1	CTSL1	chr9:90340973-90346384	Barretts	Cancer	OK	15.3362	76.3583	2.31584	2.06611	5e-05	0.00245342	yes
CDC6	CDC6	CDC6	chr17:38444145-38459413	Barretts	Cancer	OK	5.1997	25.3935	2.28796	1.39686	5e-05	0.00245342	yes
ITGAX	ITGAX	ITGAX	chr16:31366508-31394318	Barretts	Cancer	OK	0.917572	4.47292	2.28532	1.46263	0.0001	0.00419723	yes
ADAM12	ADAM12	ADAM12	chr10:127702901-128077127	Barretts	Cancer	OK	0.360041	1.74255	2.27497	1.29313	5e-05	0.00245342	yes
TEAD4	TEAD4	TEAD4	chr12:3068477-3149842	Barretts	Cancer	OK	1.84388	8.64521	2.22915	1.40642	5e-05	0.00245342	yes
FAIM3	FAIM3	FAIM3	chr1:207070787-207095378	Barretts	Cancer	OK	0.537279	2.45669	2.19297	0.734873	0.00325	0.0492592	yes
NR4A1	NR4A1	NR4A1	chr12:52416615-52453291	Barretts	Cancer	OK	1.99115	9.01173	2.1782	1.37695	5e-05	0.00245342	yes
EGFR	EGFR	EGFR	chr7:55086724-55275031	Barretts	Cancer	OK	11.6604	51.8594	2.15299	0.649045	0.0011	0.0237047	yes
UBE2C	UBE2C	UBE2C	chr20:44441254-44445596	Barretts	Cancer	OK	20.2071	89.58	2.14832	1.73549	5e-05	0.00245342	yes
FAM65B	FAM65B	FAM65B	chr6:24804512-24911195	Barretts	Cancer	OK	1.20791	5.35447	2.14823	1.39285	0.00045	0.0129777	yes
KCNJ15	KCNJ15	KCNJ15	chr21:39601836-39673746	Barretts	Cancer	OK	2.23293	9.89102	2.14718	1.20086	0.0007	0.0175528	yes
IFI44L	IFI44L	IFI44L	chr1:79086087-79111830	Barretts	Cancer	OK	2.56033	11.3375	2.14669	1.33656	5e-05	0.00245342	yes
KIF26B	KIF26B	KIF26B	chr1:245318286-245866428	Barretts	Cancer	OK	0.454521	2.01098	2.14548	1.37563	5e-05	0.00245342	yes
IL2RA	IL2RA	IL2RA	chr10:6052656-6104333	Barretts	Cancer	OK	0.884163	3.87055	2.13016	1.32614	5e-05	0.00245342	yes
ATHL1	ATHL1	ATHL1	chr11:289137-295688	Barretts	Cancer	OK	3.17611	13.8678	2.12641	1.37919	5e-05	0.00245342	yes
NUF2	NUF2	NUF2	chr1:163291722-163325553	Barretts	Cancer	OK	3.39626	14.815	2.12504	1.414	0.00025	0.00848321	yes
LAMP3	LAMP3	LAMP3	chr3:182840002-182880667	Barretts	Cancer	OK	1.86302	8.04662	2.11074	1.2326	5e-05	0.00245342	yes
SNX10	SNX10	SNX10	chr7:26331514-26413949	Barretts	Cancer	OK	2.41672	10.4034	2.10593	1.43153	0.0003	0.00960634	yes
CHI3L1	CHI3L1	CHI3L1	chr1:203148058-203155922	Barretts	Cancer	OK	3.61288	15.3557	2.08755	1.28804	5e-05	0.00245342	yes
ERVMER34-1	ERVMER34-1	ERVMER34-1	chr4:53609683-53617807	Barretts	Cancer	OK	0.715435	3.0296	2.08223	1.1459	0.00115	0.0243589	yes
COCH	COCH	COCH	chr14:31343740-31359822	Barretts	Cancer	OK	1.16248	4.84551	2.05944	1.20988	0.00105	0.0232517	yes
ORAOV1	ORAOV1	ORAOV1	chr11:69480331-69490165	Barretts	Cancer	OK	4.422	18.3888	2.05605	1.31543	5e-05	0.00245342	yes
APOLD1	APOLD1	APOLD1	chr12:12878850-12944399	Barretts	Cancer	OK	1.66295	6.90899	2.05473	1.6542	5e-05	0.00245342	yes
KIAA1199	KIAA1199	KIAA1199	chr15:81071711-81243999	Barretts	Cancer	OK	2.67961	11.1207	2.05316	1.21915	5e-05	0.00245342	yes
HBA1	HBA1	HBA1	chr16:226678-227520	Barretts	Cancer	OK	4.77035	19.5305	2.03356	1.06585	5e-05	0.00245342	yes
NR4A2	NR4A2	NR4A2	chr2:157180943-157189287	Barretts	Cancer	OK	1.16104	4.69577	2.01595	1.20919	0.0002	0.00712324	yes
THBS1	THBS1	THBS1	chr15:39873279-39889668	Barretts	Cancer	OK	12.0273	48.6308	2.01556	1.33167	5e-05	0.00245342	yes
CCL22	CCL22	CCL22	chr16:57392694-57400102	Barretts	Cancer	OK	0.730428	2.94603	2.01196	1.00378	5e-05	0.00245342	yes
TROAP	TROAP	TROAP	chr12:49716970-49725514	Barretts	Cancer	OK	2.59886	10.4384	2.00595	1.05179	0.0011	0.0237047	yes
AGT	AGT	AGT	chr1:230838271-230850336	Barretts	Cancer	OK	4.44167	17.8383	2.0058	1.46457	5e-05	0.00245342	yes
MCM8	MCM8	MCM8	chr20:5931297-5975831	Barretts	Cancer	OK	3.58335	14.3551	2.00219	1.58514	5e-05	0.00245342	yes
PLA2G7	PLA2G7	PLA2G7	chr6:46655611-46703430	Barretts	Cancer	OK	4.92611	19.6997	1.99965	1.39969	0.00015	0.00568375	yes
MTHFD1L	MTHFD1L	MTHFD1L	chr6:151186814-151423023	Barretts	Cancer	OK	2.50666	10.003	1.99659	1.41242	5e-05	0.00245342	yes
LIPF	LIPF	LIPF	chr10:90424145-90438572	Barretts	Cancer	OK	741.968	2950.23	1.9914	0.269013	0.0024	0.0398277	yes
RBP4	RBP4	RBP4	chr10:95351592-95360993	Barretts	Cancer	OK	3.16387	12.5066	1.98292	1.05436	5e-05	0.00245342	yes
HOXB9	HOXB9	HOXB9	chr17:46698518-46703835	Barretts	Cancer	OK	1.39666	5.51448	1.98125	1.25374	0.00025	0.00848321	yes
MX2	MX2	MX2	chr21:42733949-42780869	Barretts	Cancer	OK	6.14697	24.114	1.97192	1.53998	5e-05	0.00245342	yes
PDE4B	PDE4B	PDE4B	chr1:66258192-66840262	Barretts	Cancer	OK	1.95798	7.65363	1.96678	1.33307	5e-05	0.00245342	yes
C3	C3	C3	chr19:6677845-6720662	Barretts	Cancer	OK	8.5982	33.059	1.94294	1.15342	0.0004	0.0119396	yes
MFI2	MFI2	MFI2	chr3:196728611-196756687	Barretts	Cancer	OK	1.29254	4.936	1.93313	1.19406	0.0002	0.00712324	yes
C1orf162	C1orf162	C1orf162	chr1:112016603-112021134	Barretts	Cancer	OK	3.06139	11.6638	1.92978	0.966667	0.00095	0.0218532	yes
MCM10	MCM10	MCM10	chr10:13203553-13253104	Barretts	Cancer	OK	1.68548	6.42096	1.92963	1.62581	5e-05	0.00245342	yes
CEACAM7	CEACAM7	CEACAM7	chr19:42177234-42192096	Barretts	Cancer	OK	12.3828	46.6368	1.91313	1.14787	5e-05	0.00245342	yes
OLFML2B	OLFML2B	OLFML2B	chr1:161952981-161993644	Barretts	Cancer	OK	1.64145	6.17976	1.91258	1.13058	0.0007	0.0175528	yes
LGR5	LGR5	LGR5	chr12:71833812-71978621	Barretts	Cancer	OK	0.699437	2.6245	1.90778	0.97282	0.0005	0.0140629	yes
HELLS	HELLS	HELLS	chr10:96305573-96361856	Barretts	Cancer	OK	5.08008	18.9374	1.89831	1.3631	5e-05	0.00245342	yes
GDF15	GDF15	GDF15	chr19:18496967-18499986	Barretts	Cancer	OK	8.95838	33.3744	1.89743	1.2156	5e-05	0.00245342	yes
FSTL3	FSTL3	FSTL3	chr19:676388-683392	Barretts	Cancer	OK	1.70737	6.3504	1.89507	1.13622	0.0002	0.00712324	yes
CXCL3	CXCL3	CXCL3	chr4:74902311-74904490	Barretts	Cancer	OK	7.91138	29.3274	1.89025	1.10047	0.0011	0.0237047	yes
PON3	PON3	PON3	chr7:94989183-95025687	Barretts	Cancer	OK	2.27373	8.42276	1.88923	1.00697	0.0002	0.00712324	yes
UBD	UBD	UBD	chr6_qbl_hap6:826706-831021	Barretts	Cancer	OK	39.7029	145.93	1.87796	1.39658	5e-05	0.00245342	yes
PTGES	PTGES	PTGES	chr9:132500614-132515344	Barretts	Cancer	OK	3.81786	13.9596	1.87042	1.08463	0.001	0.022399	yes
ZDHHC11	ZDHHC11	ZDHHC11	chr5:795719-851101	Barretts	Cancer	OK	0.688981	2.477	1.84606	0.931754	0.0006	0.0157396	yes
HEYL	HEYL	HEYL	chr1:40089102-40105348	Barretts	Cancer	OK	0.468692	1.68096	1.84257	0.941829	0.0009	0.0210221	yes
RCN3	RCN3	RCN3	chr19:50030874-50046890	Barretts	Cancer	OK	4.07342	14.5654	1.83823	1.11744	0.0003	0.00960634	yes
WDR62	WDR62	WDR62	chr19:36545782-36596012	Barretts	Cancer	OK	0.56944	2.0251	1.83038	1.20224	0.00055	0.014886	yes
ALOX5AP	ALOX5AP	ALOX5AP	chr13:31287614-31338565	Barretts	Cancer	OK	5.21288	18.4514	1.82358	1.10583	0.00035	0.0107773	yes
NEIL2	NEIL2	NEIL2	chr8:11627171-11644854	Barretts	Cancer	OK	4.30512	15.2376	1.82351	1.1145	0.0031	0.0475136	yes
TPX2	TPX2	TPX2	chr20:30326903-30389603	Barretts	Cancer	OK	10.7036	37.8421	1.82189	1.44534	5e-05	0.00245342	yes
HERC5	HERC5	HERC5	chr4:89378267-89427319	Barretts	Cancer	OK	1.42057	5.0194	1.82105	1.06578	0.0009	0.0210221	yes
MSR1	MSR1	MSR1	chr8:15965386-16050300	Barretts	Cancer	OK	4.13828	14.6135	1.8202	1.50845	0.00015	0.00568375	yes
ZNF239	ZNF239	ZNF239	chr10:44051792-44070066	Barretts	Cancer	OK	1.90667	6.72436	1.81834	1.17342	0.00275	0.0437722	yes
NNMT	NNMT	NNMT	chr11:114166534-114183238	Barretts	Cancer	OK	3.92193	13.7662	1.8115	1.12298	0.00115	0.0243589	yes
PLEK	PLEK	PLEK	chr2:68592321-68624585	Barretts	Cancer	OK	3.75811	13.1548	1.80751	1.39951	5e-05	0.00245342	yes
KIF23	KIF23	KIF23	chr15:69706626-69740764	Barretts	Cancer	OK	5.29704	18.5402	1.8074	1.47102	5e-05	0.00245342	yes
FCER1G	FCER1G	FCER1G	chr1:161185086-161189038	Barretts	Cancer	OK	19.4853	68.1584	1.80651	1.29399	5e-05	0.00245342	yes
MMP25	MMP25	MMP25	chr16:3096681-3110724	Barretts	Cancer	OK	0.485002	1.69465	1.80493	0.885871	0.0013	0.0269503	yes
SRGN	SRGN	SRGN	chr10:70847827-70864567	Barretts	Cancer	OK	31.5481	110.012	1.80204	1.58761	5e-05	0.00245342	yes
COL9A2	COL9A2	COL9A2	chr1:40766162-40782939	Barretts	Cancer	OK	3.33436	11.6184	1.80093	1.27524	5e-05	0.00245342	yes
LOC100288637	LOC100288637	LOC100288637	chr15:30938317-31065209	Barretts	Cancer	OK	0.632249	2.1927	1.79414	1.131	0.00125	0.0261522	yes
CDC45	CDC45	CDC45	chr22:19467413-19508135	Barretts	Cancer	OK	2.92328	10.1207	1.79165	1.10275	0.0014	0.0282924	yes
PFDN4	PFDN4	PFDN4	chr20:52824501-52836492	Barretts	Cancer	OK	7.84409	27.1444	1.79097	1.3022	5e-05	0.00245342	yes
E2F1	E2F1	E2F1	chr20:32263291-32274210	Barretts	Cancer	OK	2.59659	8.94643	1.78469	1.37323	5e-05	0.00245342	yes
GINS1	GINS1	GINS1	chr20:25388322-25429191	Barretts	Cancer	OK	4.20292	14.4455	1.78116	1.28246	5e-05	0.00245342	yes
BRCA2	BRCA2	BRCA2	chr13:32889616-32973809	Barretts	Cancer	OK	2.1824	7.45467	1.77223	1.61757	5e-05	0.00245342	yes
NCF2	NCF2	NCF2	chr1:183524696-183560056	Barretts	Cancer	OK	4.41807	15.0391	1.76723	1.45963	5e-05	0.00245342	yes
FOXRED2	FOXRED2	FOXRED2	chr22:36883232-36903148	Barretts	Cancer	OK	1.83656	6.21909	1.7597	1.35762	5e-05	0.00245342	yes
ANKRD36	ANKRD36	ANKRD36	chr2:97779232-97930257	Barretts	Cancer	OK	2.19984	7.42405	1.75481	1.39963	5e-05	0.00245342	yes
DZIP1L	DZIP1L	DZIP1L	chr3:137780826-137834451	Barretts	Cancer	OK	1.74572	5.88027	1.75206	1.13355	0.0009	0.0210221	yes
BLM	BLM	BLM	chr15:91260578-91358686	Barretts	Cancer	OK	2.35916	7.93965	1.7508	1.40892	5e-05	0.00245342	yes
STC1	STC1	STC1	chr8:23699433-23712320	Barretts	Cancer	OK	1.82782	6.07428	1.73259	1.05171	0.0007	0.0175528	yes
PRRX1	PRRX1	PRRX1	chr1:170633312-170708541	Barretts	Cancer	OK	2.28234	7.51909	1.72004	1.32156	0.0001	0.00419723	yes
TMEM74B	TMEM74B	TMEM74B	chr20:1161214-1165117	Barretts	Cancer	OK	0.804204	2.64171	1.71584	0.838373	0.0004	0.0119396	yes
FOXM1	FOXM1	FOXM1	chr12:2945981-2998691	Barretts	Cancer	OK	7.17608	23.5101	1.71201	1.17343	0.00035	0.0107773	yes
CCNE1	CCNE1	CCNE1	chr19:30302900-30315215	Barretts	Cancer	OK	1.88115	6.15818	1.71089	1.07634	0.00095	0.0218532	yes
COL4A1	COL4A1	COL4A1	chr13:110801309-110959496	Barretts	Cancer	OK	20.2253	66.0873	1.70821	1.34842	5e-05	0.00245342	yes
STRIP2	STRIP2	STRIP2	chr7:129074273-129128239	Barretts	Cancer	OK	0.961647	3.12702	1.70121	1.10232	0.00085	0.0202001	yes
MYBL1	MYBL1	MYBL1	chr8:67474409-67525480	Barretts	Cancer	OK	0.526843	1.71022	1.69874	1.1403	0.00245	0.0405588	yes
FCN1	FCN1	FCN1	chr9:137801430-137809806	Barretts	Cancer	OK	1.88051	6.10259	1.6983	0.955838	0.0001	0.00419723	yes
APOD	APOD	APOD	chr3:195295572-195311076	Barretts	Cancer	OK	5.29552	17.1784	1.69776	1.08595	0.00045	0.0129777	yes
STEAP1	STEAP1	STEAP1	chr7:89783688-89794141	Barretts	Cancer	OK	13.3009	43.1346	1.69732	1.32705	5e-05	0.00245342	yes
RELT	RELT	RELT	chr11:73087404-73108519	Barretts	Cancer	OK	0.843459	2.73243	1.69579	1.06007	0.0006	0.0157396	yes
FAM72B	FAM72B	FAM72B	chr1:120839004-120855681	Barretts	Cancer	OK	0.724992	2.332	1.68553	0.868065	0.00115	0.0243589	yes
KIF4A	KIF4A	KIF4A	chrX:69509878-69640774	Barretts	Cancer	OK	3.29103	10.5728	1.68374	1.314	5e-05	0.00245342	yes
FGR	FGR	FGR	chr1:27938800-27961727	Barretts	Cancer	OK	1.27398	4.08794	1.68203	1.04236	0.00055	0.014886	yes
ICAM1	ICAM1	ICAM1	chr19:10381516-10397291	Barretts	Cancer	OK	6.11012	19.5164	1.67542	1.41636	0.0001	0.00419723	yes
MND1	MND1	MND1	chr4:154265800-154336247	Barretts	Cancer	OK	2.3006	7.32763	1.67133	0.871232	0.00145	0.0289173	yes
DBF4	DBF4	DBF4	chr7:87463813-87538856	Barretts	Cancer	OK	5.20318	16.4844	1.66364	1.06504	0.001	0.022399	yes
NFKB2	NFKB2	NFKB2	chr10:104153866-104162286	Barretts	Cancer	OK	4.49527	14.2323	1.66269	1.41317	0.0002	0.00712324	yes
CDK1	CDK1	CDK1	chr10:62538088-62554610	Barretts	Cancer	OK	15.2334	48.1142	1.65923	1.44408	5e-05	0.00245342	yes
CHN1	CHN1	CHN1	chr2:175664041-175870107	Barretts	Cancer	OK	2.29933	7.23538	1.65386	1.22703	0.00185	0.0337829	yes
FXYD5	FXYD5	FXYD5	chr19:35645624-35660788	Barretts	Cancer	OK	29.5976	93.0165	1.65201	1.37169	5e-05	0.00245342	yes
RANBP17	RANBP17	RANBP17	chr5:170288895-170727019	Barretts	Cancer	OK	0.945378	2.96858	1.65081	1.00398	0.00205	0.0361293	yes
SLC2A3	SLC2A3	SLC2A3	chr12:8071823-8088892	Barretts	Cancer	OK	3.1027	9.73193	1.6492	1.33844	5e-05	0.00245342	yes
ALOX5	ALOX5	ALOX5	chr10:45869623-45941567	Barretts	Cancer	OK	4.03954	12.6647	1.64855	1.37456	0.0001	0.00419723	yes
SNRPF	SNRPF	SNRPF	chr12:96252708-96260238	Barretts	Cancer	OK	32.6231	101.692	1.64023	1.17269	0.00015	0.00568375	yes
CENPI	CENPI	CENPI	chrX:100354797-100417978	Barretts	Cancer	OK	1.56765	4.8784	1.63781	1.00684	0.0015	0.0296974	yes
CLCN4	CLCN4	CLCN4	chrX:10124984-10205699	Barretts	Cancer	OK	1.15977	3.60799	1.63735	1.24575	5e-05	0.00245342	yes
RENBP	RENBP	RENBP	chrX:153200721-153210232	Barretts	Cancer	OK	1.09569	3.40543	1.63599	0.83676	0.0014	0.0282924	yes
CPNE7	CPNE7	CPNE7	chr16:89642175-89663654	Barretts	Cancer	OK	0.637856	1.9796	1.63391	0.879363	0.00205	0.0361293	yes
TTK	TTK	TTK	chr6:80714321-80752244	Barretts	Cancer	OK	6.33125	19.6347	1.63285	1.36928	5e-05	0.00245342	yes
IFI6	IFI6	IFI6	chr1:27992571-27998724	Barretts	Cancer	OK	92.6107	285.395	1.62371	0.938211	0.00165	0.0316119	yes
FSD1L	FSD1L	FSD1L	chr9:108210314-108311385	Barretts	Cancer	OK	1.92778	5.9313	1.62141	1.05147	5e-05	0.00245342	yes
PM20D2	PM20D2	PM20D2	chr6:89855768-89875288	Barretts	Cancer	OK	5.47189	16.8013	1.61846	1.52274	5e-05	0.00245342	yes
KIAA0226L	KIAA0226L	KIAA0226L	chr13:46916136-46961635	Barretts	Cancer	OK	0.627424	1.91852	1.61248	0.884881	0.00225	0.0384615	yes
BST2	BST2	BST2	chr19:17513754-17516384	Barretts	Cancer	OK	24.3808	74.5408	1.61228	1.26736	5e-05	0.00245342	yes
KNTC1	KNTC1	KNTC1	chr12:123011808-123110947	Barretts	Cancer	OK	3.55306	10.8273	1.60753	1.44679	5e-05	0.00245342	yes
ATAD5	ATAD5	ATAD5	chr17:29159022-29222295	Barretts	Cancer	OK	1.97739	6.02231	1.60672	1.28723	5e-05	0.00245342	yes
CTGF	CTGF	CTGF	chr6:132269316-132272518	Barretts	Cancer	OK	8.21401	24.9958	1.60553	1.26739	5e-05	0.00245342	yes
KIF2C	KIF2C	KIF2C	chr1:45205489-45233438	Barretts	Cancer	OK	4.30845	13.0995	1.60427	1.303	5e-05	0.00245342	yes
ANLN	ANLN	ANLN	chr7:36363758-36493400	Barretts	Cancer	OK	10.617	32.2744	1.60401	1.23923	0.0001	0.00419723	yes
RAMP1	RAMP1	RAMP1	chr2:238768186-238820755	Barretts	Cancer	OK	4.95954	14.9694	1.59373	0.999332	0.0018	0.0333611	yes
CEP55	CEP55	CEP55	chr10:95256368-95288849	Barretts	Cancer	OK	13.7898	41.574	1.59207	1.34258	5e-05	0.00245342	yes
YEATS4	YEATS4	YEATS4	chr12:69753531-69784576	Barretts	Cancer	OK	10.6947	32.126	1.58684	0.9681	0.0006	0.0157396	yes
DNMT3B	DNMT3B	DNMT3B	chr20:31350190-31397162	Barretts	Cancer	OK	0.713592	2.13151	1.5787	0.980042	0.00135	0.0275679	yes
F2RL3	F2RL3	F2RL3	chr19:16999825-17002830	Barretts	Cancer	OK	0.544893	1.62532	1.57668	0.811846	0.0022	0.0379876	yes
SPINK1	SPINK1	SPINK1	chr5:147204142-147211260	Barretts	Cancer	OK	281.345	838.906	1.57617	1.08565	0.00115	0.0243589	yes
COL15A1	COL15A1	COL15A1	chr9:101706137-101833068	Barretts	Cancer	OK	8.13235	24.2471	1.57607	1.4457	5e-05	0.00245342	yes
CKS1B	CKS1B	CKS1B	chr1:154947117-154951725	Barretts	Cancer	OK	17.5409	52.252	1.57477	1.34474	5e-05	0.00245342	yes
RAD51AP1	RAD51AP1	RAD51AP1	chr12:4647949-4669213	Barretts	Cancer	OK	3.78614	11.2748	1.5743	1.22464	0.0001	0.00419723	yes
PRR11	PRR11	PRR11	chr17:57232859-57284070	Barretts	Cancer	OK	3.07252	9.14505	1.57357	1.21782	0.0001	0.00419723	yes
CDKN3	CDKN3	CDKN3	chr14:54863672-54886934	Barretts	Cancer	OK	12.1013	35.618	1.55744	1.2563	0.0003	0.00960634	yes
SOCS3	SOCS3	SOCS3	chr17:76352858-76356158	Barretts	Cancer	OK	9.24163	27.036	1.54866	1.25106	5e-05	0.00245342	yes
NCAPH	NCAPH	NCAPH	chr2:97001483-97041274	Barretts	Cancer	OK	2.43275	7.00139	1.52505	1.23407	5e-05	0.00245342	yes
VRK1	VRK1	VRK1	chr14:97263683-97347951	Barretts	Cancer	OK	7.3019	21.0084	1.52462	1.21105	5e-05	0.00245342	yes
FAM167A	FAM167A	FAM167A	chr8:11197145-11324276	Barretts	Cancer	OK	0.795124	2.28304	1.5217	0.95839	0.00225	0.0384615	yes
CDC25B	CDC25B	CDC25B	chr20:3776400-3786761	Barretts	Cancer	OK	6.9152	19.811	1.51846	1.35596	5e-05	0.00245342	yes
STOX1	STOX1	STOX1	chr10:70587293-70655209	Barretts	Cancer	OK	2.31164	6.61177	1.51612	0.856712	0.003	0.0465034	yes
KIF15	KIF15	KIF15	chr3:44803208-44894748	Barretts	Cancer	OK	2.81424	8.04037	1.51451	1.1978	5e-05	0.00245342	yes
TYROBP	TYROBP	TYROBP	chr19:36395302-36399211	Barretts	Cancer	OK	26.9145	76.8525	1.51371	1.17179	0.0006	0.0157396	yes
CDCA5	CDCA5	CDCA5	chr11:64844926-64851615	Barretts	Cancer	OK	4.34143	12.3947	1.51348	1.22066	5e-05	0.00245342	yes
EPSTI1	EPSTI1	EPSTI1	chr13:43460523-43566407	Barretts	Cancer	OK	10.5427	29.7352	1.49592	1.18716	5e-05	0.00245342	yes
KIF20B	KIF20B	KIF20B	chr10:91461366-91534700	Barretts	Cancer	OK	5.68884	16.043	1.49574	1.2833	5e-05	0.00245342	yes
NFE2L3	NFE2L3	NFE2L3	chr7:26191846-26226756	Barretts	Cancer	OK	9.07175	25.3928	1.48497	1.45563	5e-05	0.00245342	yes
KIF18B	KIF18B	KIF18B	chr17:43002078-43025079	Barretts	Cancer	OK	1.60246	4.46094	1.47706	1.14866	0.0003	0.00960634	yes
CDC7	CDC7	CDC7	chr1:91966403-91991321	Barretts	Cancer	OK	3.13163	8.69402	1.47311	1.19407	0.00025	0.00848321	yes
LCP2	LCP2	LCP2	chr5:169675087-169724822	Barretts	Cancer	OK	4.02235	11.1185	1.46684	1.05966	0.0003	0.00960634	yes
TLR2	TLR2	TLR2	chr4:154605440-154627242	Barretts	Cancer	OK	2.75618	7.60572	1.46442	1.17546	0.00015	0.00568375	yes
IFITM1	IFITM1	IFITM1	chr11:313990-315272	Barretts	Cancer	OK	73.9295	203.684	1.46211	1.21292	0.0001	0.00419723	yes
TGM2	TGM2	TGM2	chr20:36756863-36793700	Barretts	Cancer	OK	13.3865	36.7237	1.45593	1.14979	5e-05	0.00245342	yes
CHEK1	CHEK1	CHEK1	chr11:125495030-125550793	Barretts	Cancer	OK	3.98358	10.9125	1.45384	1.31449	0.00055	0.014886	yes
PSMD3	PSMD3	PSMD3	chr17:38137020-38154213	Barretts	Cancer	OK	26.9514	73.603	1.4494	0.921457	0.0005	0.0140629	yes
GEM	GEM	GEM	chr8:95261484-95274547	Barretts	Cancer	OK	5.10296	13.8925	1.4449	1.19264	0.0008	0.0192806	yes
ASNS	ASNS	ASNS	chr7:97481428-97501854	Barretts	Cancer	OK	10.406	28.2109	1.43884	1.19623	0.0001	0.00419723	yes
DYSF	DYSF	DYSF	chr2:71680752-71913893	Barretts	Cancer	OK	1.046	2.82828	1.43504	1.03764	0.00135	0.0275679	yes
PTTG1	PTTG1	PTTG1	chr5:159848864-159855746	Barretts	Cancer	OK	26.6199	71.7834	1.43115	1.14411	0.0002	0.00712324	yes
MRPL21	MRPL21	MRPL21	chr11:68658745-68671303	Barretts	Cancer	OK	46.3486	124.831	1.42938	0.951156	0.00165	0.0316119	yes
RPF2	RPF2	RPF2	chr6:111303290-111346794	Barretts	Cancer	OK	19.1402	51.4327	1.42608	1.07108	0.00025	0.00848321	yes
THY1	THY1	THY1	chr11:119252487-119369944	Barretts	Cancer	OK	9.27882	24.8771	1.4228	1.27647	5e-05	0.00245342	yes
IFI30	IFI30	IFI30	chr19:18284578-18288927	Barretts	Cancer	OK	56.8467	151.779	1.41683	1.35341	5e-05	0.00245342	yes
STARD3	STARD3	STARD3	chr17:37793332-37820454	Barretts	Cancer	OK	5.08232	13.5587	1.41566	0.977186	0.00155	0.0305102	yes
DYNLRB1	DYNLRB1	DYNLRB1	chr20:33104203-33128762	Barretts	Cancer	OK	91.6975	243.854	1.41107	0.90843	0.0011	0.0237047	yes
SCML1	SCML1	SCML1	chrX:17755591-17773105	Barretts	Cancer	OK	4.88324	12.9841	1.41083	1.12789	0.00115	0.0243589	yes
NCOA7	NCOA7	NCOA7	chr6:126102306-126253176	Barretts	Cancer	OK	21.0633	55.9711	1.40995	1.26205	0.0001	0.00419723	yes
GBP5	GBP5	GBP5	chr1:89724633-89738544	Barretts	Cancer	OK	3.32815	8.83319	1.40821	1.13985	0.0008	0.0192806	yes
COL12A1	COL12A1	COL12A1	chr6:75794041-75915623	Barretts	Cancer	OK	11.397	30.2429	1.40795	1.19745	0.00025	0.00848321	yes
EXO1	EXO1	EXO1	chr1:242011492-242053241	Barretts	Cancer	OK	2.68878	7.1332	1.40759	1.08619	0.0015	0.0296974	yes
ANKRD36B	ANKRD36B	ANKRD36B	chr2:98121260-98206428	Barretts	Cancer	OK	2.06527	5.44902	1.39967	0.98196	0.00075	0.0185005	yes
SLC29A1	SLC29A1	SLC29A1	chr6:44187241-44201888	Barretts	Cancer	OK	8.4422	22.1281	1.39019	1.21377	5e-05	0.00245342	yes
NOP58	NOP58	NOP58	chr2:203130514-203168384	Barretts	Cancer	OK	23.7906	62.2792	1.38836	1.18833	5e-05	0.00245342	yes
FANCD2	FANCD2	FANCD2	chr3:10068112-10149915	Barretts	Cancer	OK	2.80125	7.30889	1.38358	1.062	0.00025	0.00848321	yes
CEP95	CEP95	CEP95	chr17:62503157-62534062	Barretts	Cancer	OK	5.92124	15.4287	1.38164	0.994265	0.00075	0.0185005	yes
CSE1L	CSE1L	CSE1L	chr20:47662782-47713497	Barretts	Cancer	OK	21.3504	55.4974	1.37816	1.16006	0.0005	0.0140629	yes
DNA2	DNA2	DNA2	chr10:70173820-70231730	Barretts	Cancer	OK	2.61446	6.78708	1.37628	1.0053	0.0006	0.0157396	yes
RECQL4	RECQL4	RECQL4	chr8:145736666-145743210	Barretts	Cancer	OK	1.87558	4.86115	1.37396	0.959044	0.001	0.022399	yes
TMEM38B	TMEM38B	TMEM38B	chr9:108456805-108538892	Barretts	Cancer	OK	2.97737	7.70623	1.37199	1.10089	0.00045	0.0129777	yes
PLAU	PLAU	PLAU	chr10:75669726-75682535	Barretts	Cancer	OK	10.0136	25.8529	1.36837	1.05195	0.0003	0.00960634	yes
ZNF367	ZNF367	ZNF367	chr9:99148224-99180669	Barretts	Cancer	OK	3.55119	9.16565	1.36794	1.06996	0.0006	0.0157396	yes
CLSPN	CLSPN	CLSPN	chr1:36197712-36235551	Barretts	Cancer	OK	2.18681	5.6368	1.36605	1.23515	5e-05	0.00245342	yes
ASS1	ASS1	ASS1	chr9:133320093-133376661	Barretts	Cancer	OK	60.4787	155.843	1.36559	0.874783	0.00135	0.0275679	yes
NEK2	NEK2	NEK2	chr1:211831598-211848972	Barretts	Cancer	OK	7.33489	18.8597	1.36246	1.08136	0.00035	0.0107773	yes
TNFAIP3	TNFAIP3	TNFAIP3	chr6:138144806-138204451	Barretts	Cancer	OK	7.13209	18.312	1.36039	1.23764	0.00015	0.00568375	yes
SKA1	SKA1	SKA1	chr18:47901391-47920538	Barretts	Cancer	OK	2.95341	7.55375	1.35481	1.02158	0.002	0.0354772	yes
PPIH	PPIH	PPIH	chr1:43124047-43142429	Barretts	Cancer	OK	13.7839	35.2461	1.35448	1.06168	0.00015	0.00568375	yes
CDC20	CDC20	CDC20	chr1:43824625-43828873	Barretts	Cancer	OK	11.7203	29.9271	1.35244	1.04767	0.0007	0.0175528	yes
MGP	MGP	MGP	chr12:15034114-15038853	Barretts	Cancer	OK	13.7356	35.0723	1.35241	1.19129	5e-05	0.00245342	yes
NOP56	NOP56	NOP56	chr20:2633177-2639039	Barretts	Cancer	OK	27.992	71.177	1.3464	1.26019	5e-05	0.00245342	yes
RFC3	RFC3	RFC3	chr13:34392205-34540695	Barretts	Cancer	OK	5.17102	13.1095	1.3421	1.06147	0.00025	0.00848321	yes
ETV4	ETV4	ETV4	chr17:41605210-41623800	Barretts	Cancer	OK	4.01018	10.1551	1.34046	1.04433	0.00195	0.0350923	yes
ATAD2	ATAD2	ATAD2	chr8:124332090-124408705	Barretts	Cancer	OK	9.63152	24.3708	1.33932	1.29739	5e-05	0.00245342	yes
GPRC5B	GPRC5B	GPRC5B	chr16:19870292-19896151	Barretts	Cancer	OK	11.8559	29.9661	1.33773	0.932553	0.00085	0.0202001	yes
AURKA	AURKA	AURKA	chr20:54944444-54967351	Barretts	Cancer	OK	13.8595	34.9829	1.33577	1.22418	0.00015	0.00568375	yes
FCGR3A	FCGR3A	FCGR3A	chr1:161511550-161520413	Barretts	Cancer	OK	9.27288	23.399	1.33536	1.19243	0.0001	0.00419723	yes
STEAP2	STEAP2	STEAP2	chr7:89840999-89866992	Barretts	Cancer	OK	8.14996	20.5168	1.33194	1.19704	5e-05	0.00245342	yes
HCK	HCK	HCK	chr20:30639990-30689657	Barretts	Cancer	OK	3.49855	8.79805	1.33043	0.987789	0.00225	0.0384615	yes
GINS2	GINS2	GINS2	chr16:85711279-85722588	Barretts	Cancer	OK	9.16321	23.0261	1.32935	0.968034	0.00065	0.016698	yes
ZNF680	ZNF680	ZNF680	chr7:63980254-64023505	Barretts	Cancer	OK	6.55864	16.4473	1.32638	1.08715	0.0001	0.00419723	yes
PDCD5	PDCD5	PDCD5	chr19:33072093-33078358	Barretts	Cancer	OK	38.1551	95.4617	1.32305	1.16388	5e-05	0.00245342	yes
CENPF	CENPF	CENPF	chr1:214776531-214837914	Barretts	Cancer	OK	9.77191	24.4371	1.32236	1.11036	0.00055	0.014886	yes
KIF18A	KIF18A	KIF18A	chr11:28042162-28129746	Barretts	Cancer	OK	3.639	9.06794	1.31723	1.0377	0.0008	0.0192806	yes
DNTTIP1	DNTTIP1	DNTTIP1	chr20:44420575-44440066	Barretts	Cancer	OK	10.0938	25.1359	1.31627	1.0353	0.0005	0.0140629	yes
PPFIA1	PPFIA1	PPFIA1	chr11:70116805-70230607	Barretts	Cancer	OK	12.235	30.4234	1.31416	1.16171	0.00025	0.00848321	yes
FN1	FN1	FN1	chr2:216225178-216300791	Barretts	Cancer	OK	31.6706	78.7396	1.31394	0.488887	0.00265	0.0429319	yes
NELFCD	NELFCD	NELFCD	chr20:57556262-57570188	Barretts	Cancer	OK	17.272	42.9372	1.31379	1.23563	5e-05	0.00245342	yes
ATP11A	ATP11A	ATP11A	chr13:113344642-113541482	Barretts	Cancer	OK	5.04365	12.5369	1.31364	1.30539	5e-05	0.00245342	yes
WDR67	WDR67	WDR67	chr8:124084919-124164392	Barretts	Cancer	OK	2.83689	7.04604	1.3125	1.0848	0.00105	0.0232517	yes
TMEM194A	TMEM194A	TMEM194A	chr12:57449425-57472574	Barretts	Cancer	OK	3.50046	8.64889	1.30497	1.17558	0.00015	0.00568375	yes
LY6E	LY6E	LY6E	chr8:144099901-144103827	Barretts	Cancer	OK	35.385	87.3165	1.30312	1.14993	0.00025	0.00848321	yes
TAGAP	TAGAP	TAGAP	chr6:159456026-159466184	Barretts	Cancer	OK	2.63938	6.50889	1.30221	0.930099	0.001	0.022399	yes
SORD	SORD	SORD	chr15:45315301-45367287	Barretts	Cancer	OK	10.4749	25.8049	1.30071	1.1383	0.0001	0.00419723	yes
PMEPA1	PMEPA1	PMEPA1	chr20:56223447-56286592	Barretts	Cancer	OK	7.00348	17.2405	1.29966	1.19443	0.00015	0.00568375	yes
CTHRC1	CTHRC1	CTHRC1	chr8:104383742-104395232	Barretts	Cancer	OK	6.90822	16.975	1.29702	0.948891	0.00225	0.0384615	yes
HJURP	HJURP	HJURP	chr2:234745485-234763212	Barretts	Cancer	OK	4.84566	11.9	1.29619	1.02823	0.0008	0.0192806	yes
UBE2T	UBE2T	UBE2T	chr1:202300784-202311094	Barretts	Cancer	OK	10.0318	24.6267	1.29565	1.00866	0.00015	0.00568375	yes
KIFC1	KIFC1	KIFC1	chr6_ssto_hap7:4839528-4857918	Barretts	Cancer	OK	5.6259	13.7958	1.29408	1.0154	0.0011	0.0237047	yes
PLK4	PLK4	PLK4	chr4:128802015-128820377	Barretts	Cancer	OK	3.26156	7.99659	1.29382	1.0381	0.00075	0.0185005	yes
DDX27	DDX27	DDX27	chr20:47835831-47860614	Barretts	Cancer	OK	16.5478	40.5431	1.29281	1.17955	5e-05	0.00245342	yes
E2F7	E2F7	E2F7	chr12:77415025-77459360	Barretts	Cancer	OK	1.09848	2.68136	1.28745	0.895632	0.00165	0.0316119	yes
ADAMTS2	ADAMTS2	ADAMTS2	chr5:178537851-178772431	Barretts	Cancer	OK	1.66897	4.07229	1.28688	0.949151	0.00055	0.014886	yes
MCM2	MCM2	MCM2	chr3:127317199-127341278	Barretts	Cancer	OK	7.14543	17.413	1.28508	1.1367	0.00015	0.00568375	yes
CD55	CD55	CD55	chr1:207494816-207534311	Barretts	Cancer	OK	44.1235	107.473	1.28435	1.08536	0.0001	0.00419723	yes
ZNF280C	ZNF280C	ZNF280C	chrX:129336672-129402922	Barretts	Cancer	OK	1.76948	4.30132	1.28145	0.917776	0.0009	0.0210221	yes
CKAP2L	CKAP2L	CKAP2L	chr2:113495443-113522254	Barretts	Cancer	OK	3.86567	9.36204	1.2761	1.00987	0.0005	0.0140629	yes
FBXO5	FBXO5	FBXO5	chr6:153291657-153304740	Barretts	Cancer	OK	6.55154	15.842	1.27385	1.009	0.0018	0.0333611	yes
STIL	STIL	STIL	chr1:47715810-47779819	Barretts	Cancer	OK	4.40743	10.6252	1.26948	1.13971	0.0001	0.00419723	yes
KPNA2	KPNA2	KPNA2	chr17:66031847-66042970	Barretts	Cancer	OK	33.4276	80.5074	1.26808	1.21484	5e-05	0.00245342	yes
PRMT1	PRMT1	PRMT1	chr19:50180408-50191707	Barretts	Cancer	OK	29.0297	69.7728	1.26513	1.20088	5e-05	0.00245342	yes
CENPJ	CENPJ	CENPJ	chr13:25456411-25497027	Barretts	Cancer	OK	3.1227	7.48464	1.26114	1.11274	0.0002	0.00712324	yes
CCNB2	CCNB2	CCNB2	chr15:59397283-59417244	Barretts	Cancer	OK	12.0438	28.838	1.25968	1.08654	0.0001	0.00419723	yes
MUC20	MUC20	MUC20	chr3:195447752-195464540	Barretts	Cancer	OK	4.27667	10.238	1.25938	1.10192	5e-05	0.00245342	yes
STIP1	STIP1	STIP1	chr11:63953586-63972020	Barretts	Cancer	OK	38.1257	90.9597	1.25446	1.18858	5e-05	0.00245342	yes
HELB	HELB	HELB	chr12:66696334-66737423	Barretts	Cancer	OK	1.97187	4.6977	1.25239	0.889056	0.0021	0.0366787	yes
PRC1	PRC1	PRC1	chr15:91509267-91537881	Barretts	Cancer	OK	16.3494	38.9352	1.25184	1.17927	0.0002	0.00712324	yes
PTPRC	PTPRC	PTPRC	chr1:198608097-198726605	Barretts	Cancer	OK	8.77408	20.8507	1.24877	1.10334	5e-05	0.00245342	yes
BAG2	BAG2	BAG2	chr6:57037103-57050012	Barretts	Cancer	OK	3.79356	9.01408	1.24863	0.880667	0.00235	0.0394297	yes
COL4A2	COL4A2	COL4A2	chr13:110959630-111165373	Barretts	Cancer	OK	15.3436	36.4477	1.24819	1.15315	5e-05	0.00245342	yes
IFITM3	IFITM3	IFITM3	chr11:319672-320914	Barretts	Cancer	OK	132.922	315.375	1.24649	1.24279	5e-05	0.00245342	yes
ZNF273	ZNF273	ZNF273	chr7:64363619-64391955	Barretts	Cancer	OK	1.55889	3.69535	1.24519	0.963591	0.00225	0.0384615	yes
PROSAPIP1	PROSAPIP1	PROSAPIP1	chr20:3143272-3149207	Barretts	Cancer	OK	3.66144	8.67482	1.24442	1.09368	0.0001	0.00419723	yes
ZBTB10	ZBTB10	ZBTB10	chr8:81398447-81434610	Barretts	Cancer	OK	1.88889	4.46282	1.24042	1.02493	0.00105	0.0232517	yes
CCDC18	CCDC18	CCDC18	chr1:93646280-93744287	Barretts	Cancer	OK	1.86457	4.40068	1.23888	0.886753	0.00145	0.0289173	yes
ECT2	ECT2	ECT2	chr3:172468474-172539264	Barretts	Cancer	OK	15.3219	36.0844	1.23578	1.11376	0.0007	0.0175528	yes
IFITM2	IFITM2	IFITM2	chr11:308106-309410	Barretts	Cancer	OK	37.6395	88.3085	1.2303	1.04998	0.0001	0.00419723	yes
POLQ	POLQ	POLQ	chr3:121150272-121264853	Barretts	Cancer	OK	1.93939	4.54644	1.22914	1.06717	0.0001	0.00419723	yes
PDPN	PDPN	PDPN	chr1:13910251-13944452	Barretts	Cancer	OK	4.22866	9.88724	1.22537	0.982458	0.0019	0.0344195	yes
MERTK	MERTK	MERTK	chr2:112656190-112786945	Barretts	Cancer	OK	3.39497	7.92655	1.2233	0.998266	0.0007	0.0175528	yes
SNRPC	SNRPC	SNRPC	chr6:34724870-34741634	Barretts	Cancer	OK	29.3341	68.4792	1.22309	1.08388	0.00025	0.00848321	yes
LIMK1	LIMK1	LIMK1	chr7:73498106-73536855	Barretts	Cancer	OK	4.59753	10.7242	1.22194	1.0153	0.0017	0.0322976	yes
THEMIS2	THEMIS2	THEMIS2	chr1:28199054-28213193	Barretts	Cancer	OK	4.07376	9.5023	1.22192	0.900292	0.00315	0.0480639	yes
SLC39A10	SLC39A10	SLC39A10	chr2:196521531-196602426	Barretts	Cancer	OK	4.64379	10.828	1.22139	1.13564	0.00015	0.00568375	yes
LOC646762	LOC646762	LOC646762	chr7:29685537-29727859	Barretts	Cancer	OK	1.47447	3.43286	1.21922	0.891915	0.00155	0.0305102	yes
HSPA1A	HSPA1A	HSPA1A	chr6_qbl_hap6:3076937-3079366	Barretts	Cancer	OK	26.9046	62.6297	1.21899	1.01942	0.00115	0.0243589	yes
DKC1	DKC1	DKC1	chrX:153991030-154005964	Barretts	Cancer	OK	17.248	40.1361	1.21847	1.14352	0.0002	0.00712324	yes
CIT	CIT	CIT	chr12:120123594-120315095	Barretts	Cancer	OK	2.38051	5.53691	1.21781	1.17178	5e-05	0.00245342	yes
TRMT6	TRMT6	TRMT6	chr20:5918485-5931173	Barretts	Cancer	OK	8.61645	20.0338	1.21727	1.07793	0.0003	0.00960634	yes
SNRPD1	SNRPD1	SNRPD1	chr18:19192259-19210208	Barretts	Cancer	OK	27.2906	63.3547	1.21505	1.1504	0.00015	0.00568375	yes
POLA2	POLA2	POLA2	chr11:65029431-65065088	Barretts	Cancer	OK	3.59797	8.34706	1.21408	0.969997	0.00085	0.0202001	yes
CACHD1	CACHD1	CACHD1	chr1:64936475-65158741	Barretts	Cancer	OK	1.42786	3.29867	1.20803	0.871007	0.0021	0.0366787	yes
PSMB9	PSMB9	PSMB9	chr6_ssto_hap7:4252710-4258398	Barretts	Cancer	OK	26.2884	60.6131	1.2052	1.05123	0.0001	0.00419723	yes
MRGBP	MRGBP	MRGBP	chr20:61427804-61431945	Barretts	Cancer	OK	8.1612	18.802	1.20403	0.948741	0.00185	0.0337829	yes
SERPINB9	SERPINB9	SERPINB9	chr6:2887499-2903546	Barretts	Cancer	OK	4.72302	10.8793	1.2038	0.937762	0.0024	0.0398277	yes
UTP20	UTP20	UTP20	chr12:101673904-101780397	Barretts	Cancer	OK	3.4047	7.84056	1.20343	1.1853	5e-05	0.00245342	yes
SLIRP	SLIRP	SLIRP	chr14:78174413-78183941	Barretts	Cancer	OK	72.7657	166.346	1.19286	0.920164	0.0025	0.0411866	yes
NPIP	NPIP	NPIP	chr16:15031299-15045931	Barretts	Cancer	OK	14.2203	32.4326	1.18949	0.94337	0.00185	0.0337829	yes
RAB3IP	RAB3IP	RAB3IP	chr12:70132630-70216984	Barretts	Cancer	OK	4.04793	9.21274	1.18644	1.05842	0.00215	0.0374084	yes
SSB	SSB	SSB	chr2:170655321-170681353	Barretts	Cancer	OK	38.2891	87.0255	1.18451	0.99386	0.0011	0.0237047	yes
WBSCR22	WBSCR22	WBSCR22	chr7:73097897-73112551	Barretts	Cancer	OK	18.991	43.1584	1.18432	1.06801	0.0002	0.00712324	yes
GTPBP4	GTPBP4	GTPBP4	chr10:1034348-1063708	Barretts	Cancer	OK	14.3484	32.5946	1.18374	1.18326	5e-05	0.00245342	yes
MELK	MELK	MELK	chr9:36572858-36677680	Barretts	Cancer	OK	7.21497	16.3666	1.18169	1.06251	0.0024	0.0398277	yes
TRIM24	TRIM24	TRIM24	chr7:138145078-138270332	Barretts	Cancer	OK	10.2297	23.1237	1.17661	1.03398	0.00055	0.014886	yes
RBL1	RBL1	RBL1	chr20:35626177-35724410	Barretts	Cancer	OK	4.33915	9.80561	1.1762	0.979105	0.0019	0.0344195	yes
IQGAP3	IQGAP3	IQGAP3	chr1:156495196-156542396	Barretts	Cancer	OK	5.1202	11.5697	1.17608	1.02539	0.00055	0.014886	yes
ZNF107	ZNF107	ZNF107	chr7:64126510-64171401	Barretts	Cancer	OK	3.68643	8.32455	1.17515	1.07443	0.00045	0.0129777	yes
HIST1H2AJ	HIST1H2AJ	HIST1H2AJ	chr6:27782079-27782518	Barretts	Cancer	OK	154.544	347.489	1.16895	1.01061	0.0003	0.00960634	yes
FAM50A	FAM50A	FAM50A	chrX:153672472-153679002	Barretts	Cancer	OK	16.9516	38.0857	1.16783	1.01103	0.00045	0.0129777	yes
GINS4	GINS4	GINS4	chr8:41386724-41402565	Barretts	Cancer	OK	1.71393	3.84973	1.16745	0.823755	0.00285	0.0448407	yes
CASC5	CASC5	CASC5	chr15:40886446-40954881	Barretts	Cancer	OK	5.26441	11.8241	1.16739	0.99361	0.00075	0.0185005	yes
HMMR	HMMR	HMMR	chr5:162887516-162918953	Barretts	Cancer	OK	7.83323	17.529	1.16206	1.01326	0.0023	0.0387816	yes
NDC80	NDC80	NDC80	chr18:2571509-2616634	Barretts	Cancer	OK	5.30982	11.8794	1.16173	0.940885	0.00175	0.032836	yes
FKBP5	FKBP5	FKBP5	chr6:35541361-35704724	Barretts	Cancer	OK	9.41929	21.0232	1.15829	0.96784	0.0008	0.0192806	yes
SPOCK2	SPOCK2	SPOCK2	chr10:73818791-73848790	Barretts	Cancer	OK	4.19885	9.35483	1.15572	0.860018	0.00165	0.0316119	yes
LAMC2	LAMC2	LAMC2	chr1:183155173-183214262	Barretts	Cancer	OK	26.294	58.4575	1.15265	0.938469	0.00065	0.016698	yes
PTPN12	PTPN12	PTPN12	chr7:77166772-77269388	Barretts	Cancer	OK	13.7582	30.5664	1.15166	1.14381	0.00025	0.00848321	yes
FYB	FYB	FYB	chr5:39105353-39270759	Barretts	Cancer	OK	4.3242	9.60402	1.1512	1.00107	0.00295	0.0459897	yes
SMYD5	SMYD5	SMYD5	chr2:73441365-73454355	Barretts	Cancer	OK	4.19303	9.30949	1.15071	0.927406	0.00225	0.0384615	yes
MSI2	MSI2	MSI2	chr17:55333930-55757299	Barretts	Cancer	OK	11.0742	24.5318	1.14744	0.975955	0.00155	0.0305102	yes
SOD2	SOD2	SOD2	chr6:160100148-160114353	Barretts	Cancer	OK	115.056	254.712	1.14653	0.986804	0.00215	0.0374084	yes
WDR75	WDR75	WDR75	chr2:190306158-190340264	Barretts	Cancer	OK	13.1182	29.0404	1.14649	1.13623	5e-05	0.00245342	yes
NASP	NASP	NASP	chr1:46049659-46084578	Barretts	Cancer	OK	16.3191	36.1199	1.14624	1.01107	0.0008	0.0192806	yes
IFI44	IFI44	IFI44	chr1:79115476-79129763	Barretts	Cancer	OK	13.7286	30.2337	1.13898	0.906511	0.00145	0.0289173	yes
ASPM	ASPM	ASPM	chr1:197053256-197115824	Barretts	Cancer	OK	6.05274	13.3045	1.13625	0.929466	0.00255	0.0417582	yes
TULP3	TULP3	TULP3	chr12:3000032-3050306	Barretts	Cancer	OK	6.09397	13.3846	1.13511	0.966745	0.00015	0.00568375	yes
CCNF	CCNF	CCNF	chr16:2479394-2508859	Barretts	Cancer	OK	4.43888	9.72509	1.13152	1.00267	0.0005	0.0140629	yes
PELI2	PELI2	PELI2	chr14:56585092-56768031	Barretts	Cancer	OK	4.7718	10.4517	1.13113	0.933509	0.00165	0.0316119	yes
VMP1	VMP1	VMP1	chr17:57784862-57917952	Barretts	Cancer	OK	47.9129	104.868	1.13008	1.07548	0.00015	0.00568375	yes
CD163	CD163	CD163	chr12:7623411-7656414	Barretts	Cancer	OK	7.29077	15.8913	1.1241	1.04976	0.001	0.022399	yes
VGLL3	VGLL3	VGLL3	chr3:86987122-87040257	Barretts	Cancer	OK	0.752433	1.63966	1.12376	0.811473	0.0026	0.0423229	yes
BUB1B	BUB1B	BUB1B	chr15:40453209-40569688	Barretts	Cancer	OK	5.2652	11.4723	1.12359	0.866667	0.0031	0.0475136	yes
BRCA1	BRCA1	BRCA1	chr17:41196311-41277500	Barretts	Cancer	OK	5.1426	11.1977	1.12263	0.9839	0.00185	0.0337829	yes
HMGB3	HMGB3	HMGB3	chrX:150151762-150159248	Barretts	Cancer	OK	9.13066	19.8802	1.12254	1.11543	5e-05	0.00245342	yes
ORC3	ORC3	ORC3	chr6:88299784-88377172	Barretts	Cancer	OK	7.25488	15.7899	1.12198	0.9671	0.00065	0.016698	yes
XRN2	XRN2	XRN2	chr20:21283941-21370463	Barretts	Cancer	OK	20.4095	44.31	1.11839	1.08291	0.0001	0.00419723	yes
ADRM1	ADRM1	ADRM1	chr20:60878026-60883918	Barretts	Cancer	OK	28.0383	60.8341	1.11748	1.0903	0.0004	0.0119396	yes
HSD3B7	HSD3B7	HSD3B7	chr16:30996518-31000473	Barretts	Cancer	OK	6.68637	14.4715	1.11392	0.911127	0.002	0.0354772	yes
UTP14A	UTP14A	UTP14A	chrX:129040096-129063738	Barretts	Cancer	OK	10.3045	22.2253	1.10893	0.99195	0.0006	0.0157396	yes
RNASEH2A	RNASEH2A	RNASEH2A	chr19:12917427-12924462	Barretts	Cancer	OK	8.90046	19.1776	1.10747	0.881287	0.00145	0.0289173	yes
FMNL2	FMNL2	FMNL2	chr2:153191750-153506348	Barretts	Cancer	OK	5.35322	11.4816	1.10085	1.02389	0.0002	0.00712324	yes
QSER1	QSER1	QSER1	chr11:32914791-33001814	Barretts	Cancer	OK	6.80705	14.5805	1.09893	1.05344	0.00035	0.0107773	yes
MASTL	MASTL	MASTL	chr10:27443752-27475848	Barretts	Cancer	OK	5.84019	12.5079	1.09876	0.975202	0.0027	0.0434324	yes
PLEKHG2	PLEKHG2	PLEKHG2	chr19:39903749-39919055	Barretts	Cancer	OK	1.37311	2.93556	1.09619	0.88028	0.0027	0.0434324	yes
ODF2	ODF2	ODF2	chr9:131217433-131263571	Barretts	Cancer	OK	9.41412	20.1239	1.09601	0.998973	0.00095	0.0218532	yes
CKS2	CKS2	CKS2	chr9:91926112-91931618	Barretts	Cancer	OK	39.9221	85.2814	1.09504	0.97323	0.0005	0.0140629	yes
WEE1	WEE1	WEE1	chr11:9595227-9611313	Barretts	Cancer	OK	5.60252	11.946	1.09238	0.972356	0.0016	0.0312688	yes
LAPTM5	LAPTM5	LAPTM5	chr1:31205314-31230683	Barretts	Cancer	OK	26.7283	56.9799	1.09208	1.02432	0.00065	0.016698	yes
ASAP1	ASAP1	ASAP1	chr8:131064350-131455906	Barretts	Cancer	OK	4.55562	9.70638	1.09129	0.994666	0.00095	0.0218532	yes
PSMC1	PSMC1	PSMC1	chr14:90722893-90738966	Barretts	Cancer	OK	28.4861	60.6639	1.09058	1.02462	0.00075	0.0185005	yes
SLC7A11	SLC7A11	SLC7A11	chr4:138948576-139163503	Barretts	Cancer	OK	3.73339	7.94047	1.08874	0.953208	0.00045	0.0129777	yes
NAV2	NAV2	NAV2	chr11:19372270-20143147	Barretts	Cancer	OK	1.71827	3.64427	1.08468	0.960909	0.00225	0.0384615	yes
NXT1	NXT1	NXT1	chr20:23331372-23335408	Barretts	Cancer	OK	9.37355	19.8662	1.08365	0.877544	0.0031	0.0475136	yes
BUB1	BUB1	BUB1	chr2:111395408-111435684	Barretts	Cancer	OK	8.97377	19.0101	1.08298	1.01373	0.00055	0.014886	yes
SMC2	SMC2	SMC2	chr9:106856540-106903700	Barretts	Cancer	OK	8.7844	18.5795	1.08069	1.05308	0.0017	0.0322976	yes
C1QB	C1QB	C1QB	chr1:22979681-22988029	Barretts	Cancer	OK	65.1529	137.55	1.07806	0.965808	0.00065	0.016698	yes
MB21D1	MB21D1	MB21D1	chr6:74134855-74162043	Barretts	Cancer	OK	5.27225	11.1041	1.0746	0.847455	0.00275	0.0437722	yes
ADAMDEC1	ADAMDEC1	ADAMDEC1	chr8:24241797-24263526	Barretts	Cancer	OK	5.33196	11.2242	1.07388	0.877174	0.0023	0.0387816	yes
NUP85	NUP85	NUP85	chr17:73201596-73231854	Barretts	Cancer	OK	7.66232	16.122	1.07318	0.939439	0.0007	0.0175528	yes
RSRC1	RSRC1	RSRC1	chr3:157827840-158262624	Barretts	Cancer	OK	14.4721	30.4354	1.07248	1.01949	0.0009	0.0210221	yes
PKDCC	PKDCC	PKDCC	chr2:42275160-42285668	Barretts	Cancer	OK	11.8327	24.8657	1.07138	0.967442	0.00115	0.0243589	yes
ANP32B	ANP32B	ANP32B	chr9:100745488-100778224	Barretts	Cancer	OK	18.7421	39.3254	1.06918	0.930521	0.00165	0.0316119	yes
R3HDM1	R3HDM1	R3HDM1	chr2:136289082-136482839	Barretts	Cancer	OK	4.06867	8.53161	1.06826	0.947578	0.0007	0.0175528	yes
CAD	CAD	CAD	chr2:27440257-27466654	Barretts	Cancer	OK	3.71648	7.78551	1.06686	0.919407	0.0019	0.0344195	yes
DUSP1	DUSP1	DUSP1	chr5:172195092-172198203	Barretts	Cancer	OK	29.7377	62.1292	1.06298	0.973184	0.0001	0.00419723	yes
ZWINT	ZWINT	ZWINT	chr10:58117198-58121034	Barretts	Cancer	OK	21.3576	44.5902	1.06198	1.00669	0.0011	0.0237047	yes
FIGNL1	FIGNL1	FIGNL1	chr7:50511831-50518088	Barretts	Cancer	OK	7.20673	15.0436	1.06173	1.00799	0.00055	0.014886	yes
TAF15	TAF15	TAF15	chr17:34136458-34174246	Barretts	Cancer	OK	10.4523	21.7859	1.05958	0.960151	0.0012	0.0253002	yes
KIF14	KIF14	KIF14	chr1:200520624-200589862	Barretts	Cancer	OK	2.64257	5.50787	1.05955	0.935224	0.00045	0.0129777	yes
MCM4	MCM4	MCM4	chr8:48872762-48890719	Barretts	Cancer	OK	16.2316	33.825	1.05929	1.00006	0.00085	0.0202001	yes
KIF22	KIF22	KIF22	chr16:29802033-29816706	Barretts	Cancer	OK	10.9335	22.7804	1.05904	0.928812	0.0019	0.0344195	yes
OSMR	OSMR	OSMR	chr5:38845959-38935743	Barretts	Cancer	OK	6.58006	13.6773	1.05561	0.9295	0.00095	0.0218532	yes
CEP250	CEP250	CEP250	chr20:34043222-34099803	Barretts	Cancer	OK	3.68582	7.64648	1.05281	0.972872	0.0014	0.0282924	yes
WDR43	WDR43	WDR43	chr2:29117532-29171080	Barretts	Cancer	OK	19.1677	39.7036	1.05059	0.988467	0.00055	0.014886	yes
CNTRL	CNTRL	CNTRL	chr9:123850573-123939886	Barretts	Cancer	OK	4.64984	9.62392	1.04944	0.97807	0.0008	0.0192806	yes
GTPBP10	GTPBP10	GTPBP10	chr7:89975978-90020769	Barretts	Cancer	OK	4.90492	10.1451	1.04847	0.968594	0.0002	0.00712324	yes
DDX47	DDX47	DDX47	chr12:12966279-12982915	Barretts	Cancer	OK	15.1942	31.3704	1.04589	0.961248	0.0011	0.0237047	yes
FAM133B	FAM133B	FAM133B	chr7:92190071-92219706	Barretts	Cancer	OK	7.75903	16.0138	1.04537	0.928052	0.001	0.022399	yes
HMGB2	HMGB2	HMGB2	chr4:174252526-174255595	Barretts	Cancer	OK	55.3927	114.265	1.04461	1.00179	0.0015	0.0296974	yes
LTV1	LTV1	LTV1	chr6:144164507-144184943	Barretts	Cancer	OK	11.8964	24.5242	1.04369	0.919775	0.00075	0.0185005	yes
NEDD1	NEDD1	NEDD1	chr12:97301000-97347469	Barretts	Cancer	OK	7.88279	16.2315	1.04202	1.00649	0.00145	0.0289173	yes
TCOF1	TCOF1	TCOF1	chr5:149737201-149779871	Barretts	Cancer	OK	6.09152	12.5186	1.0392	1.02663	0.0016	0.0312688	yes
CSPP1	CSPP1	CSPP1	chr8:67976602-68108849	Barretts	Cancer	OK	3.68706	7.56823	1.03749	0.885415	0.00165	0.0316119	yes
STAT5A	STAT5A	STAT5A	chr17:40439564-40463960	Barretts	Cancer	OK	4.62573	9.4543	1.03129	0.900611	0.00175	0.032836	yes
MSH2	MSH2	MSH2	chr2:47630205-47710367	Barretts	Cancer	OK	7.9687	16.2762	1.03035	0.945015	0.0023	0.0387816	yes
NUDCD1	NUDCD1	NUDCD1	chr8:110253147-110346350	Barretts	Cancer	OK	5.93687	12.1118	1.02864	0.983542	0.00115	0.0243589	yes
XPOT	XPOT	XPOT	chr12:64798152-64842463	Barretts	Cancer	OK	21.8792	44.6351	1.02861	0.965707	0.0011	0.0237047	yes
OSGIN2	OSGIN2	OSGIN2	chr8:90914095-90940095	Barretts	Cancer	OK	6.21349	12.5564	1.01495	0.958878	0.0014	0.0282924	yes
NT5DC3	NT5DC3	NT5DC3	chr12:104166080-104234975	Barretts	Cancer	OK	2.04024	4.10346	1.0081	0.877548	0.002	0.0354772	yes
MGME1	MGME1	MGME1	chr20:17949761-17971762	Barretts	Cancer	OK	9.87551	19.841	1.00656	0.894383	0.0016	0.0312688	yes
LTBP2	LTBP2	LTBP2	chr14:74964885-75079034	Barretts	Cancer	OK	3.64493	7.31071	1.00412	0.87006	0.0028	0.044361	yes
C11orf30	C11orf30	C11orf30	chr11:76156068-76262589	Barretts	Cancer	OK	3.56712	7.14369	1.00191	0.874544	0.0011	0.0237047	yes
FEN1	FEN1	FEN1	chr11:61560108-61564714	Barretts	Cancer	OK	13.9684	27.9393	1.00013	0.938519	0.00115	0.0243589	yes
LMNB1	LMNB1	LMNB1	chr5:126112314-126172712	Barretts	Cancer	OK	18.386	36.7525	0.999232	0.907237	0.00185	0.0337829	yes
PGM2L1	PGM2L1	PGM2L1	chr11:74041360-74109502	Barretts	Cancer	OK	4.49579	8.97371	0.997129	0.92228	0.00075	0.0185005	yes
RCN1	RCN1	RCN1	chr11:32112476-32127272	Barretts	Cancer	OK	46.432	92.5484	0.995088	0.958873	0.00115	0.0243589	yes
RUNX1	RUNX1	RUNX1	chr21:36160097-36421595	Barretts	Cancer	OK	6.95653	13.833	0.991672	0.826565	0.00275	0.0437722	yes
SMC3	SMC3	SMC3	chr10:112327448-112364392	Barretts	Cancer	OK	17.0256	33.8151	0.989964	0.918613	0.00095	0.0218532	yes
HTRA1	HTRA1	HTRA1	chr10:124221040-124274424	Barretts	Cancer	OK	12.0041	23.7972	0.987271	0.887357	0.00275	0.0437722	yes
INCENP	INCENP	INCENP	chr11:61891444-61920635	Barretts	Cancer	OK	6.6536	13.1869	0.986894	0.914807	0.00185	0.0337829	yes
FGD6	FGD6	FGD6	chr12:95470524-95611240	Barretts	Cancer	OK	4.96107	9.81127	0.983787	0.939063	0.002	0.0354772	yes
SERPINH1	SERPINH1	SERPINH1	chr11:75273100-75283849	Barretts	Cancer	OK	22.7204	44.8886	0.982362	0.908275	0.0024	0.0398277	yes
PDZK1IP1	PDZK1IP1	PDZK1IP1	chr1:47649260-47655771	Barretts	Cancer	OK	65.5048	129.266	0.980664	0.882975	0.00275	0.0437722	yes
KIF11	KIF11	KIF11	chr10:94352824-94415152	Barretts	Cancer	OK	8.88492	17.5296	0.980362	0.926433	0.00125	0.0261522	yes
UTP18	UTP18	UTP18	chr17:49337896-49375292	Barretts	Cancer	OK	11.2577	22.1923	0.979146	0.880517	0.0023	0.0387816	yes
STMN1	STMN1	STMN1	chr1:26210676-26233368	Barretts	Cancer	OK	55.7993	109.94	0.978403	0.920874	0.00245	0.0405588	yes
RAI14	RAI14	RAI14	chr5:34656432-34832717	Barretts	Cancer	OK	9.19073	18.0959	0.977416	0.987395	0.0016	0.0312688	yes
TOMM40	TOMM40	TOMM40	chr19:45394476-45406946	Barretts	Cancer	OK	19.2036	37.6933	0.972935	0.880495	0.0032	0.0487179	yes
QSOX2	QSOX2	QSOX2	chr9:139098181-139137687	Barretts	Cancer	OK	3.16846	6.21224	0.971331	0.844087	0.0023	0.0387816	yes
STARD3NL	STARD3NL	STARD3NL	chr7:38217807-38270272	Barretts	Cancer	OK	9.96317	19.4858	0.967749	0.84923	0.00255	0.0417582	yes
SIK1	SIK1	SIK1	chr21:44834397-44847002	Barretts	Cancer	OK	3.53838	6.90799	0.965175	0.829735	0.001	0.022399	yes
KIAA1462	KIAA1462	KIAA1462	chr10:30301728-30348488	Barretts	Cancer	OK	1.9881	3.86596	0.959441	0.84587	0.003	0.0465034	yes
MDC1	MDC1	MDC1	chr6_ssto_hap7:1999890-2017765	Barretts	Cancer	OK	2.59901	5.05151	0.958753	0.888426	0.00095	0.0218532	yes
POLR2G	POLR2G	POLR2G	chr11:62529010-62534187	Barretts	Cancer	OK	22.9954	44.5625	0.954482	0.825769	0.00265	0.0429319	yes
VPS13B	VPS13B	VPS13B	chr8:100025493-100889814	Barretts	Cancer	OK	7.75743	15.0163	0.952881	0.677692	0.00285	0.0448407	yes
MLLT10	MLLT10	MLLT10	chr10:21823100-22032559	Barretts	Cancer	OK	7.22455	13.9824	0.952635	0.73369	0.0018	0.0333611	yes
PDS5B	PDS5B	PDS5B	chr13:33160563-33352158	Barretts	Cancer	OK	6.67683	12.907	0.950917	0.960851	0.0008	0.0192806	yes
ACTL6A	ACTL6A	ACTL6A	chr3:179280707-179306193	Barretts	Cancer	OK	17.0896	33.0004	0.949367	0.923925	0.0027	0.0434324	yes
ABCA1	ABCA1	ABCA1	chr9:107543283-107690527	Barretts	Cancer	OK	5.56923	10.7406	0.947523	0.970509	0.00085	0.0202001	yes
BRIX1	BRIX1	BRIX1	chr5:34915819-34925787	Barretts	Cancer	OK	19.1313	36.8566	0.945988	0.889097	0.00175	0.032836	yes
PNPT1	PNPT1	PNPT1	chr2:55861197-55921045	Barretts	Cancer	OK	8.80191	16.9381	0.944387	0.944621	0.0006	0.0157396	yes
NAT10	NAT10	NAT10	chr11:34127110-34168458	Barretts	Cancer	OK	7.90334	15.0976	0.933787	0.863934	0.00295	0.0459897	yes
DDX10	DDX10	DDX10	chr11:108535815-108811648	Barretts	Cancer	OK	8.61228	16.4395	0.932702	0.86345	0.0033	0.0497407	yes
IPO9	IPO9	IPO9	chr1:201798287-201853422	Barretts	Cancer	OK	4.42555	8.37017	0.919401	0.923531	0.0008	0.0192806	yes
NID2	NID2	NID2	chr14:52471519-52535946	Barretts	Cancer	OK	3.3804	6.39303	0.919307	0.808813	0.003	0.0465034	yes
CDCA7L	CDCA7L	CDCA7L	chr7:21582832-21985542	Barretts	Cancer	OK	11.4531	21.55	0.911956	0.895629	0.00305	0.0470645	yes
RCN2	RCN2	RCN2	chr15:77223961-77242601	Barretts	Cancer	OK	17.1253	32.1832	0.91018	0.926878	0.0011	0.0237047	yes
ABCF1	ABCF1	ABCF1	chr6_ssto_hap7:1871447-1891586	Barretts	Cancer	OK	17.0403	31.9762	0.908048	0.926742	0.002	0.0354772	yes
TRIO	TRIO	TRIO	chr5:14143828-14509458	Barretts	Cancer	OK	6.15303	11.5457	0.907993	0.925595	0.0013	0.0269503	yes
DOCK11	DOCK11	DOCK11	chrX:117629871-117820123	Barretts	Cancer	OK	2.96594	5.55887	0.906302	0.836609	0.0018	0.0333611	yes
UBA2	UBA2	UBA2	chr19:34919267-34960798	Barretts	Cancer	OK	27.2799	50.8802	0.899264	0.906739	0.00135	0.0275679	yes
MCM3	MCM3	MCM3	chr6:52128811-52149679	Barretts	Cancer	OK	27.8397	51.8749	0.897891	0.845978	0.00285	0.0448407	yes
DPY19L1	DPY19L1	DPY19L1	chr7:34968492-35077653	Barretts	Cancer	OK	10.4982	19.5252	0.895199	0.912821	0.0012	0.0253002	yes
MTHFD1	MTHFD1	MTHFD1	chr14:64854758-64926725	Barretts	Cancer	OK	14.3661	26.4275	0.879369	0.891115	0.00135	0.0275679	yes
INPPL1	INPPL1	INPPL1	chr11:71935881-71955220	Barretts	Cancer	OK	8.52407	15.6744	0.878797	0.836295	0.0029	0.0453657	yes
LCP1	LCP1	LCP1	chr13:46700057-46756459	Barretts	Cancer	OK	20.8097	37.9027	0.865047	0.822347	0.0033	0.0497407	yes
GMPS	GMPS	GMPS	chr3:155588324-155655520	Barretts	Cancer	OK	16.0304	29.191	0.864711	0.878283	0.002	0.0354772	yes
TGFBI	TGFBI	TGFBI	chr5:135364583-135399507	Barretts	Cancer	OK	25.8656	47.0837	0.864194	0.87744	0.00185	0.0337829	yes
ASXL1	ASXL1	ASXL1	chr20:30946146-31027122	Barretts	Cancer	OK	6.89416	12.5041	0.858952	0.772381	0.0018	0.0333611	yes
SMS	SMS	SMS	chrX:21958690-22012955	Barretts	Cancer	OK	35.2009	63.5863	0.853103	0.875604	0.0023	0.0387816	yes
KIAA0146	KIAA0146	KIAA0146	chr8:48173488-48648563	Barretts	Cancer	OK	12.3627	22.0989	0.837989	0.845969	0.00275	0.0437722	yes
POLR2K	POLR2K	POLR2K	chr8:101162838-101166230	Barretts	Cancer	OK	39.0223	69.3376	0.82934	0.831931	0.0022	0.0379876	yes
RANBP1	RANBP1	RANBP1	chr22:20105023-20114704	Barretts	Cancer	OK	54.7167	96.5049	0.818621	0.806059	0.00175	0.032836	yes
RNF141	RNF141	RNF141	chr11:10533224-10562774	Barretts	Cancer	OK	39.0552	22.4391	-0.799499	-0.787296	0.0024	0.0398277	yes
TLCD2	TLCD2	TLCD2	chr17:1606083-1613662	Barretts	Cancer	OK	14.2397	8.11181	-0.811826	-0.812969	0.00275	0.0437722	yes
ACSL1	ACSL1	ACSL1	chr4:185676748-185747215	Barretts	Cancer	OK	28.6469	16.1767	-0.82446	-0.825418	0.003	0.0465034	yes
PITPNA	PITPNA	PITPNA	chr17:1420212-1466110	Barretts	Cancer	OK	40.1223	22.3677	-0.842985	-0.858465	0.00225	0.0384615	yes
DOPEY2	DOPEY2	DOPEY2	chr21:37536838-37666572	Barretts	Cancer	OK	14.0079	7.73116	-0.857481	-0.865063	0.0025	0.0411866	yes
MAP2K2	MAP2K2	MAP2K2	chr19:4090319-4124126	Barretts	Cancer	OK	55.4476	30.5878	-0.85817	-0.852395	0.00205	0.0361293	yes
PRKAB2	PRKAB2	PRKAB2	chr1:146626684-146644129	Barretts	Cancer	OK	18.4666	9.9872	-0.886767	-0.88473	0.00085	0.0202001	yes
GAK	GAK	GAK	chr4:843064-926174	Barretts	Cancer	OK	33.1724	17.8568	-0.893511	-0.91577	0.00175	0.032836	yes
AP1M2	AP1M2	AP1M2	chr19:10683346-10697991	Barretts	Cancer	OK	75.6544	40.685	-0.894927	-0.908385	0.00175	0.032836	yes
SQLE	SQLE	SQLE	chr8:126010719-126034525	Barretts	Cancer	OK	44.5215	23.8365	-0.901328	-0.919889	0.001	0.022399	yes
LPCAT4	LPCAT4	LPCAT4	chr15:34651088-34659395	Barretts	Cancer	OK	32.3535	17.2863	-0.904297	-0.860353	0.0031	0.0475136	yes
FBLIM1	FBLIM1	FBLIM1	chr1:16085254-16113084	Barretts	Cancer	OK	43.1711	22.8791	-0.916036	-0.906201	0.0025	0.0411866	yes
MPC1	MPC1	MPC1	chr6:166778407-166796501	Barretts	Cancer	OK	88.8458	47.0689	-0.91653	-0.938996	0.00285	0.0448407	yes
RALA	RALA	RALA	chr7:39663151-39747723	Barretts	Cancer	OK	49.0902	26.0036	-0.916725	-0.93455	0.00165	0.0316119	yes
PEX26	PEX26	PEX26	chr22:18560685-18573797	Barretts	Cancer	OK	21.1157	11.1753	-0.918007	-0.950392	0.0026	0.0423229	yes
RNF11	RNF11	RNF11	chr1:51701944-51739119	Barretts	Cancer	OK	51.2055	27.0757	-0.919299	-0.949892	0.00135	0.0275679	yes
TCP11L2	TCP11L2	TCP11L2	chr12:106696580-106740792	Barretts	Cancer	OK	19.3654	10.2171	-0.922496	-0.787002	0.00205	0.0361293	yes
GPD1L	GPD1L	GPD1L	chr3:32148002-32210207	Barretts	Cancer	OK	43.6059	22.9639	-0.925158	-0.877699	0.0015	0.0296974	yes
SLC25A23	SLC25A23	SLC25A23	chr19:6440074-6459781	Barretts	Cancer	OK	23.0359	12.1054	-0.92823	-0.869962	0.0029	0.0453657	yes
CLTB	CLTB	CLTB	chr5:175819455-175843570	Barretts	Cancer	OK	186.049	97.5665	-0.931222	-0.901102	0.0021	0.0366787	yes
ALDH3A2	ALDH3A2	ALDH3A2	chr17:19552063-19580908	Barretts	Cancer	OK	72.5552	37.8843	-0.937477	-0.895671	0.0023	0.0387816	yes
TEP1	TEP1	TEP1	chr14:20833825-20881579	Barretts	Cancer	OK	14.7565	7.69579	-0.939208	-0.94613	0.0004	0.0119396	yes
ZFYVE1	ZFYVE1	ZFYVE1	chr14:73436158-73493920	Barretts	Cancer	OK	7.45773	3.88882	-0.939405	-0.859385	0.00135	0.0275679	yes
SIRT7	SIRT7	SIRT7	chr17:79869814-79876058	Barretts	Cancer	OK	23.7011	12.3479	-0.940685	-0.873111	0.00125	0.0261522	yes
LETM1	LETM1	LETM1	chr4:1813205-1857974	Barretts	Cancer	OK	27.4263	14.2738	-0.94219	-0.973197	0.00065	0.016698	yes
CHCHD10	CHCHD10	CHCHD10	chr22:24105207-24110141	Barretts	Cancer	OK	119.666	62.2736	-0.942325	-0.889272	0.0022	0.0379876	yes
DSCR3	DSCR3	DSCR3	chr21:38595725-38639833	Barretts	Cancer	OK	27.3593	14.2195	-0.94416	-0.949441	0.0012	0.0253002	yes
ADH5	ADH5	ADH5	chr4:99992129-100009931	Barretts	Cancer	OK	71.9383	37.329	-0.946465	-0.87082	0.0024	0.0398277	yes
TMC4	TMC4	TMC4	chr19:54663833-54676944	Barretts	Cancer	OK	35.7181	18.4547	-0.952672	-0.903742	0.0025	0.0411866	yes
HGD	HGD	HGD	chr3:120347014-120401418	Barretts	Cancer	OK	27.7908	14.2976	-0.958837	-0.908279	0.0022	0.0379876	yes
MYO5B	MYO5B	MYO5B	chr18:47349155-47721451	Barretts	Cancer	OK	44.6601	22.9644	-0.959591	-0.854351	0.00235	0.0394297	yes
PDE5A	PDE5A	PDE5A	chr4:120375937-120549981	Barretts	Cancer	OK	21.82	11.1957	-0.962709	-0.92365	0.0028	0.044361	yes
PROM1	PROM1	PROM1	chr4:15969848-16085623	Barretts	Cancer	OK	63.1844	32.3305	-0.966674	-0.897336	0.0026	0.0423229	yes
CARD6	CARD6	CARD6	chr5:40841409-40855456	Barretts	Cancer	OK	18.757	9.59394	-0.967233	-0.954943	0.00065	0.016698	yes
RRAGA	RRAGA	RRAGA	chr9:19049371-19051021	Barretts	Cancer	OK	33.1151	16.9095	-0.969653	-0.917111	0.0021	0.0366787	yes
PGRMC2	PGRMC2	PGRMC2	chr4:129190391-129209984	Barretts	Cancer	OK	32.3654	16.52	-0.970234	-1.00247	0.00105	0.0232517	yes
ATP6V1D	ATP6V1D	ATP6V1D	chr14:67804580-67826720	Barretts	Cancer	OK	62.9894	32.1423	-0.970638	-0.972919	0.0005	0.0140629	yes
ID3	ID3	ID3	chr1:23884420-23886285	Barretts	Cancer	OK	48.0477	24.4769	-0.973044	-0.929848	0.00115	0.0243589	yes
AFAP1L2	AFAP1L2	AFAP1L2	chr10:116054582-116164515	Barretts	Cancer	OK	10.9126	5.54729	-0.976145	-0.892344	0.00325	0.0492592	yes
SPINT1	SPINT1	SPINT1	chr15:41136245-41149853	Barretts	Cancer	OK	87.6578	44.5487	-0.9765	-0.937822	0.00185	0.0337829	yes
PAFAH2	PAFAH2	PAFAH2	chr1:26286257-26324648	Barretts	Cancer	OK	25.6103	13.0105	-0.977051	-0.972307	0.00065	0.016698	yes
GRAMD4	GRAMD4	GRAMD4	chr22:47022657-47075688	Barretts	Cancer	OK	21.2165	10.7782	-0.97707	-0.965377	0.001	0.022399	yes
DEGS2	DEGS2	DEGS2	chr14:100612752-100626012	Barretts	Cancer	OK	27.397	13.9057	-0.978346	-0.894999	0.00055	0.014886	yes
ASB13	ASB13	ASB13	chr10:5680819-5708558	Barretts	Cancer	OK	16.3284	8.28484	-0.978837	-0.897483	0.00255	0.0417582	yes
PDCD4	PDCD4	PDCD4	chr10:112631552-112679124	Barretts	Cancer	OK	88.9776	45.126	-0.979482	-0.871202	0.0033	0.0497407	yes
ACOT11	ACOT11	ACOT11	chr1:55013806-55100417	Barretts	Cancer	OK	17.6311	8.93285	-0.980934	-0.927753	0.0014	0.0282924	yes
RETSAT	RETSAT	RETSAT	chr2:85569077-85581821	Barretts	Cancer	OK	68.934	34.8931	-0.982275	-0.908737	0.00195	0.0350923	yes
CANT1	CANT1	CANT1	chr17:76987797-77005899	Barretts	Cancer	OK	57.7881	29.2317	-0.983236	-0.97632	0.00165	0.0316119	yes
VDR	VDR	VDR	chr12:48235319-48298814	Barretts	Cancer	OK	17.9064	9.02338	-0.988739	-0.997444	0.001	0.022399	yes
BDH2	BDH2	BDH2	chr4:103998781-104021024	Barretts	Cancer	OK	14.9374	7.50735	-0.992553	-0.917189	0.0013	0.0269503	yes
F2RL1	F2RL1	F2RL1	chr5:76114832-76131140	Barretts	Cancer	OK	60.2507	30.2589	-0.993622	-0.934602	0.0013	0.0269503	yes
SORT1	SORT1	SORT1	chr1:109852187-109940563	Barretts	Cancer	OK	44.2113	22.182	-0.995026	-0.923591	0.003	0.0465034	yes
PRDX6	PRDX6	PRDX6	chr1:173446485-173457946	Barretts	Cancer	OK	138.216	69.3242	-0.995489	-0.939358	0.00185	0.0337829	yes
LMO4	LMO4	LMO4	chr1:87794150-87814607	Barretts	Cancer	OK	28.9691	14.522	-0.99628	-0.892678	0.00195	0.0350923	yes
SPPL2A	SPPL2A	SPPL2A	chr15:50999736-51057910	Barretts	Cancer	OK	69.5678	34.712	-1.00298	-1.02354	0.0001	0.00419723	yes
TTLL12	TTLL12	TTLL12	chr22:43562627-43583137	Barretts	Cancer	OK	38.6447	19.2594	-1.00471	-1.03259	0.0006	0.0157396	yes
TUBB2A	TUBB2A	TUBB2A	chr6:3153901-3157783	Barretts	Cancer	OK	33.0939	16.4692	-1.00679	-0.88248	0.00235	0.0394297	yes
AHCYL2	AHCYL2	AHCYL2	chr7:128864854-129070052	Barretts	Cancer	OK	37.6761	18.7465	-1.00703	-0.922821	0.0019	0.0344195	yes
CDKN1A	CDKN1A	CDKN1A	chr6:36644236-36655116	Barretts	Cancer	OK	70.2077	34.8633	-1.00992	-0.984321	0.0011	0.0237047	yes
KCNK6	KCNK6	KCNK6	chr19:38810483-38819649	Barretts	Cancer	OK	18.7535	9.30713	-1.01075	-0.953048	0.0009	0.0210221	yes
GNA11	GNA11	GNA11	chr19:3094407-3121454	Barretts	Cancer	OK	45.4186	22.5158	-1.01234	-0.929865	0.00205	0.0361293	yes
CHP1	CHP1	CHP1	chr15:41523436-41574083	Barretts	Cancer	OK	125.408	62.1522	-1.01275	-0.904485	0.002	0.0354772	yes
NDOR1	NDOR1	NDOR1	chr9:140100118-140113813	Barretts	Cancer	OK	9.43137	4.66249	-1.01636	-0.938015	0.0024	0.0398277	yes
TOLLIP	TOLLIP	TOLLIP	chr11:1295597-1330892	Barretts	Cancer	OK	19.697	9.73634	-1.01652	-1.01408	0.0002	0.00712324	yes
PRR15	PRR15	PRR15	chr7:29603426-29606911	Barretts	Cancer	OK	50.6169	25.0182	-1.01664	-1.01799	0.00015	0.00568375	yes
WFS1	WFS1	WFS1	chr4:6271576-6304992	Barretts	Cancer	OK	10.4506	5.15635	-1.01916	-0.960809	0.0018	0.0333611	yes
CASZ1	CASZ1	CASZ1	chr1:10696665-10856733	Barretts	Cancer	OK	10.9701	5.3851	-1.02653	-1.03013	0.00135	0.0275679	yes
PLXNA2	PLXNA2	PLXNA2	chr1:208195587-208417665	Barretts	Cancer	OK	13.3626	6.53053	-1.03293	-1.05734	0.0001	0.00419723	yes
SLC35A3	SLC35A3	SLC35A3	chr1:100435344-100492534	Barretts	Cancer	OK	50.9535	24.8927	-1.03346	-0.930892	0.0028	0.044361	yes
ACOX3	ACOX3	ACOX3	chr4:8368008-8442452	Barretts	Cancer	OK	12.3342	6.01825	-1.03525	-0.952603	0.00145	0.0289173	yes
PEPD	PEPD	PEPD	chr19:33877854-34012799	Barretts	Cancer	OK	46.297	22.5571	-1.03733	-0.909889	0.001	0.022399	yes
EGLN3	EGLN3	EGLN3	chr14:34393420-34420284	Barretts	Cancer	OK	28.6003	13.9191	-1.03896	-0.971107	0.0004	0.0119396	yes
HECTD3	HECTD3	HECTD3	chr1:45468219-45477027	Barretts	Cancer	OK	24.6558	11.9296	-1.04738	-1.06578	0.00015	0.00568375	yes
OCIAD2	OCIAD2	OCIAD2	chr4:48887404-48908815	Barretts	Cancer	OK	194.995	94.3432	-1.04745	-1.05228	0.0003	0.00960634	yes
PBX1	PBX1	PBX1	chr1:164528596-164821060	Barretts	Cancer	OK	16.7583	8.09003	-1.05066	-0.946192	0.0014	0.0282924	yes
METTL7A	METTL7A	METTL7A	chr12:51318533-51326300	Barretts	Cancer	OK	49.4551	23.7389	-1.05887	-0.977568	5e-05	0.00245342	yes
USH1C	USH1C	USH1C	chr11:17515441-17565963	Barretts	Cancer	OK	76.0804	36.4604	-1.0612	-1.0619	0.00015	0.00568375	yes
LOC115110	LOC115110	LOC115110	chr1:2481358-2484284	Barretts	Cancer	OK	7.73511	3.70252	-1.06291	-0.811287	0.00165	0.0316119	yes
POLD4	POLD4	POLD4	chr11:67085309-67159158	Barretts	Cancer	OK	42.338	20.2198	-1.06618	-1.0381	0.0026	0.0423229	yes
GIPC1	GIPC1	GIPC1	chr19:14588570-14606961	Barretts	Cancer	OK	103.983	49.4653	-1.07186	-1.06535	0.00195	0.0350923	yes
SMPDL3A	SMPDL3A	SMPDL3A	chr6:123109970-123130864	Barretts	Cancer	OK	46.871	22.2807	-1.0729	-1.01481	0.00045	0.0129777	yes
TOX	TOX	TOX	chr8:59717976-60031767	Barretts	Cancer	OK	6.02852	2.85058	-1.08055	-0.853233	0.00215	0.0374084	yes
IRF6	IRF6	IRF6	chr1:209958967-209979520	Barretts	Cancer	OK	54.666	25.8108	-1.08267	-1.05874	0.00055	0.014886	yes
FAM63A	FAM63A	FAM63A	chr1:150969300-150980854	Barretts	Cancer	OK	24.2437	11.4137	-1.08684	-1.06052	0.0027	0.0434324	yes
HOOK2	HOOK2	HOOK2	chr19:12873816-12886434	Barretts	Cancer	OK	17.9993	8.46988	-1.08753	-1.0406	0.00055	0.014886	yes
PHLDA3	PHLDA3	PHLDA3	chr1:201434606-201438299	Barretts	Cancer	OK	18.1471	8.53853	-1.08768	-0.826333	0.0027	0.0434324	yes
CAMK2N1	CAMK2N1	CAMK2N1	chr1:20808883-20812728	Barretts	Cancer	OK	47.6512	22.396	-1.08927	-0.854123	0.00155	0.0305102	yes
PAQR8	PAQR8	PAQR8	chr6:52226925-52272575	Barretts	Cancer	OK	52.423	24.5756	-1.09297	-0.97781	0.00075	0.0185005	yes
NIPAL1	NIPAL1	NIPAL1	chr4:48018790-48039080	Barretts	Cancer	OK	21.412	10.0204	-1.09548	-0.931531	0.0008	0.0192806	yes
ADRA2A	ADRA2A	ADRA2A	chr10:112836789-112840662	Barretts	Cancer	OK	7.96952	3.71977	-1.09928	-0.891769	0.0029	0.0453657	yes
RHBDL2	RHBDL2	RHBDL2	chr1:39351478-39407456	Barretts	Cancer	OK	24.248	11.2929	-1.10245	-1.01827	0.00025	0.00848321	yes
GALE	GALE	GALE	chr1:24122088-24127294	Barretts	Cancer	OK	97.4103	45.2449	-1.10632	-0.957422	0.0023	0.0387816	yes
DHRS1	DHRS1	DHRS1	chr14:24759803-24769039	Barretts	Cancer	OK	21.2216	9.85317	-1.10687	-0.909409	0.0026	0.0423229	yes
SOWAHC	SOWAHC	SOWAHC	chr2:110371910-110376564	Barretts	Cancer	OK	23.3635	10.8127	-1.11153	-0.961236	0.00135	0.0275679	yes
NLRX1	NLRX1	NLRX1	chr11:119039439-119054725	Barretts	Cancer	OK	9.99885	4.61567	-1.11522	-0.884041	0.00285	0.0448407	yes
IDI1	IDI1	IDI1	chr10:1064846-1095061	Barretts	Cancer	OK	83.0705	38.227	-1.11974	-1.05819	0.00015	0.00568375	yes
TMEM54	TMEM54	TMEM54	chr1:33352097-33366953	Barretts	Cancer	OK	189.316	86.6757	-1.1271	-1.15833	5e-05	0.00245342	yes
SUCLG2	SUCLG2	SUCLG2	chr3:67410883-67705038	Barretts	Cancer	OK	133.195	60.9418	-1.12803	-1.00444	0.0006	0.0157396	yes
SH3YL1	SH3YL1	SH3YL1	chr2:218135-264068	Barretts	Cancer	OK	57.0605	26.0592	-1.1307	-1.03621	0.0006	0.0157396	yes
GDA	GDA	GDA	chr9:74729510-74867140	Barretts	Cancer	OK	21.2215	9.67784	-1.13277	-0.908853	0.0018	0.0333611	yes
CYP4F11	CYP4F11	CYP4F11	chr19:16023179-16045676	Barretts	Cancer	OK	7.3019	3.32796	-1.13363	-0.857248	0.00325	0.0492592	yes
RAB3D	RAB3D	RAB3D	chr19:11406823-11450344	Barretts	Cancer	OK	39.8869	18.1613	-1.13505	-1.15698	0.0001	0.00419723	yes
SEMA3B	SEMA3B	SEMA3B	chr3:50305039-50314572	Barretts	Cancer	OK	14.3257	6.52074	-1.1355	-1.01874	0.00125	0.0261522	yes
PAPSS2	PAPSS2	PAPSS2	chr10:89419475-89507462	Barretts	Cancer	OK	24.8377	11.2828	-1.1384	-0.981836	0.0024	0.0398277	yes
TRIM16	TRIM16	TRIM16	chr17:15531279-15586193	Barretts	Cancer	OK	53.5032	24.2908	-1.13922	-1.03261	0.00035	0.0107773	yes
EDEM3	EDEM3	EDEM3	chr1:184659624-184724041	Barretts	Cancer	OK	73.0771	33.1528	-1.14029	-0.94109	0.00195	0.0350923	yes
AKR7A2	AKR7A2	AKR7A2	chr1:19629201-19638640	Barretts	Cancer	OK	34.3317	15.5732	-1.14048	-1.07692	0.00055	0.014886	yes
PKP3	PKP3	PKP3	chr11:394216-404908	Barretts	Cancer	OK	56.3377	25.4835	-1.14453	-1.00144	0.00035	0.0107773	yes
DNAJC22	DNAJC22	DNAJC22	chr12:49741040-49745685	Barretts	Cancer	OK	16.7605	7.57746	-1.14528	-0.917958	0.0022	0.0379876	yes
RAP1GAP	RAP1GAP	RAP1GAP	chr1:21922707-21995856	Barretts	Cancer	OK	13.5787	6.13391	-1.14647	-0.923964	0.00255	0.0417582	yes
EIF4E3	EIF4E3	EIF4E3	chr3:71728439-71804328	Barretts	Cancer	OK	10.7626	4.86097	-1.14671	-1.10557	0.00035	0.0107773	yes
NAT1	NAT1	NAT1	chr8:18027970-18081198	Barretts	Cancer	OK	28.3766	12.8092	-1.14752	-0.99573	0.0017	0.0322976	yes
CDKN2B	CDKN2B	CDKN2B	chr9:21994789-22121093	Barretts	Cancer	OK	22.3646	10.0935	-1.14779	-1.00208	0.0007	0.0175528	yes
PVRL4	PVRL4	PVRL4	chr1:161040780-161059385	Barretts	Cancer	OK	20.1842	9.1051	-1.14848	-0.99932	0.0003	0.00960634	yes
MKNK2	MKNK2	MKNK2	chr19:2037469-2051243	Barretts	Cancer	OK	72.3522	32.6373	-1.14852	-1.04658	0.00105	0.0232517	yes
ZER1	ZER1	ZER1	chr9:131486740-131534213	Barretts	Cancer	OK	14.9713	6.75104	-1.14902	-1.09025	0.0003	0.00960634	yes
EMB	EMB	EMB	chr5:49692030-49737234	Barretts	Cancer	OK	33.0611	14.902	-1.14963	-1.00488	0.0005	0.0140629	yes
PLLP	PLLP	PLLP	chr16:57290008-57318584	Barretts	Cancer	OK	46.2297	20.8344	-1.14985	-1.09081	5e-05	0.00245342	yes
SLC35C1	SLC35C1	SLC35C1	chr11:45825622-45834567	Barretts	Cancer	OK	26.9955	12.1319	-1.15391	-1.12184	0.0001	0.00419723	yes
AGR3	AGR3	AGR3	chr7:16899029-16921613	Barretts	Cancer	OK	169.781	76.292	-1.15407	-0.952115	0.00045	0.0129777	yes
CLDN23	CLDN23	CLDN23	chr8:8559665-8561617	Barretts	Cancer	OK	32.5407	14.6214	-1.15416	-0.894928	0.0029	0.0453657	yes
TMEM154	TMEM154	TMEM154	chr4:153547265-153601317	Barretts	Cancer	OK	23.7351	10.6602	-1.15479	-0.948805	0.0014	0.0282924	yes
NUDT12	NUDT12	NUDT12	chr5:102884555-102898490	Barretts	Cancer	OK	19.5213	8.75335	-1.15714	-0.990825	0.0011	0.0237047	yes
TOM1L2	TOM1L2	TOM1L2	chr17:17746821-17875784	Barretts	Cancer	OK	14.6693	6.57455	-1.15783	-1.10163	0.00035	0.0107773	yes
YOD1	YOD1	YOD1	chr1:207217193-207226325	Barretts	Cancer	OK	20.4305	9.14429	-1.15979	-0.958123	0.0024	0.0398277	yes
CDS1	CDS1	CDS1	chr4:85504056-85572493	Barretts	Cancer	OK	42.0932	18.831	-1.16048	-1.18866	5e-05	0.00245342	yes
ZZEF1	ZZEF1	ZZEF1	chr17:3907738-4046253	Barretts	Cancer	OK	20.0389	8.96343	-1.16068	-1.10168	0.00025	0.00848321	yes
LINC00261	LINC00261	LINC00261	chr20:22541191-22559280	Barretts	Cancer	OK	26.1374	11.6911	-1.16071	-0.936703	0.0011	0.0237047	yes
FAM46C	FAM46C	FAM46C	chr1:118148603-118171011	Barretts	Cancer	OK	32.5389	14.5004	-1.16607	-1.10124	0.0002	0.00712324	yes
EPHB3	EPHB3	EPHB3	chr3:184279586-184300196	Barretts	Cancer	OK	12.2078	5.43857	-1.1665	-1.05683	5e-05	0.00245342	yes
CMBL	CMBL	CMBL	chr5:10277706-10308168	Barretts	Cancer	OK	30.6416	13.6319	-1.16851	-1.11582	0.0001	0.00419723	yes
THSD4	THSD4	THSD4	chr15:71433787-72075722	Barretts	Cancer	OK	8.40748	3.74018	-1.16856	-0.990995	0.0016	0.0312688	yes
TTC38	TTC38	TTC38	chr22:46663860-46689905	Barretts	Cancer	OK	30.2672	13.4416	-1.17105	-1.08371	0.0004	0.0119396	yes
GPX3	GPX3	GPX3	chr5:150399998-150408554	Barretts	Cancer	OK	35.5929	15.7778	-1.17369	-0.996131	0.0017	0.0322976	yes
SDR42E1	SDR42E1	SDR42E1	chr16:82031250-82045093	Barretts	Cancer	OK	7.47441	3.31262	-1.17399	-0.918976	0.00105	0.0232517	yes
PDIA3P	PDIA3P	PDIA3P	chr1:146649429-146651528	Barretts	Cancer	OK	8.06201	3.55834	-1.17994	-0.904972	0.0007	0.0175528	yes
SLC35D1	SLC35D1	SLC35D1	chr1:67465014-67520080	Barretts	Cancer	OK	27.1318	11.9595	-1.18182	-1.18048	5e-05	0.00245342	yes
NR2F6	NR2F6	NR2F6	chr19:17342693-17356151	Barretts	Cancer	OK	51.346	22.6088	-1.18336	-1.0989	0.00035	0.0107773	yes
CCDC68	CCDC68	CCDC68	chr18:52568739-52626739	Barretts	Cancer	OK	31.08	13.6784	-1.18408	-1.09061	0.0004	0.0119396	yes
UPP1	UPP1	UPP1	chr7:48128354-48148330	Barretts	Cancer	OK	17.3499	7.63163	-1.18486	-0.862247	0.0023	0.0387816	yes
FUT6	FUT6	FUT6	chr19:5830636-5839742	Barretts	Cancer	OK	10.9873	4.8201	-1.18871	-0.984455	0.0033	0.0497407	yes
SLC22A23	SLC22A23	SLC22A23	chr6:3269206-3456793	Barretts	Cancer	OK	30.3912	13.3188	-1.19019	-1.12414	0.0001	0.00419723	yes
FAM13A	FAM13A	FAM13A	chr4:89630939-89978346	Barretts	Cancer	OK	17.573	7.67697	-1.19475	-1.05889	0.00305	0.0470645	yes
PLD1	PLD1	PLD1	chr3:171318194-171528284	Barretts	Cancer	OK	27.475	11.981	-1.19736	-1.11872	0.00015	0.00568375	yes
FRMD3	FRMD3	FRMD3	chr9:85857904-86153348	Barretts	Cancer	OK	7.44962	3.24663	-1.19822	-0.918989	0.0013	0.0269503	yes
ZNF426	ZNF426	ZNF426	chr19:9638680-9649303	Barretts	Cancer	OK	17.2451	7.50903	-1.19949	-0.869597	0.0031	0.0475136	yes
BTD	BTD	BTD	chr3:15643254-15687325	Barretts	Cancer	OK	19.538	8.50712	-1.19954	-0.972826	0.0027	0.0434324	yes
OVOL1	OVOL1	OVOL1	chr11:65554504-65564690	Barretts	Cancer	OK	15.8336	6.88892	-1.20064	-0.930948	0.0023	0.0387816	yes
PTK6	PTK6	PTK6	chr20:62159775-62168723	Barretts	Cancer	OK	36.3692	15.7733	-1.20523	-1.12738	0.00025	0.00848321	yes
FHL1	FHL1	FHL1	chrX:135228860-135293518	Barretts	Cancer	OK	35.8644	15.5341	-1.20712	-1.06658	0.00145	0.0289173	yes
MGAT3	MGAT3	MGAT3	chr22:39853324-39888199	Barretts	Cancer	OK	9.22764	3.99646	-1.20724	-1.14553	0.00015	0.00568375	yes
CA13	CA13	CA13	chr8:86157715-86196302	Barretts	Cancer	OK	12.4802	5.39234	-1.21066	-1.06417	0.00025	0.00848321	yes
KBTBD11	KBTBD11	KBTBD11	chr8:1922043-1955109	Barretts	Cancer	OK	12.5315	5.41034	-1.21177	-1.11592	5e-05	0.00245342	yes
C14orf132	C14orf132	C14orf132	chr14:96505660-96560226	Barretts	Cancer	OK	2.85181	1.22985	-1.21339	-0.957054	0.00045	0.0129777	yes
CHFR	CHFR	CHFR	chr12:133416937-133464204	Barretts	Cancer	OK	11.7718	5.0758	-1.21362	-1.05278	0.00105	0.0232517	yes
SELENBP1	SELENBP1	SELENBP1	chr1:151336777-151345210	Barretts	Cancer	OK	91.6641	39.3722	-1.21918	-1.18155	5e-05	0.00245342	yes
SLC22A18	SLC22A18	SLC22A18	chr11:2909326-2946476	Barretts	Cancer	OK	22.7983	9.78342	-1.22052	-0.958424	0.00315	0.0480639	yes
TRIM36	TRIM36	TRIM36	chr5:114460458-114516243	Barretts	Cancer	OK	7.63218	3.27288	-1.22153	-0.965946	0.0003	0.00960634	yes
GRHL1	GRHL1	GRHL1	chr2:10091791-10142412	Barretts	Cancer	OK	22.4002	9.59685	-1.22288	-0.905563	0.00165	0.0316119	yes
PCSK7	PCSK7	PCSK7	chr11:117075787-117102811	Barretts	Cancer	OK	45.0246	19.2835	-1.22335	-1.25429	5e-05	0.00245342	yes
ALDH3B1	ALDH3B1	ALDH3B1	chr11:67776047-67796743	Barretts	Cancer	OK	21.0266	8.98887	-1.226	-1.1158	0.0008	0.0192806	yes
BCMO1	BCMO1	BCMO1	chr16:81272295-81324747	Barretts	Cancer	OK	13.3172	5.69262	-1.22613	-0.899134	0.00165	0.0316119	yes
CYP2C18	CYP2C18	CYP2C18	chr10:96443250-96495947	Barretts	Cancer	OK	69.7322	29.806	-1.22622	-0.947526	0.0031	0.0475136	yes
TM7SF2	TM7SF2	TM7SF2	chr11:64879340-64883707	Barretts	Cancer	OK	12.2006	5.20555	-1.22883	-0.859612	0.0022	0.0379876	yes
HIGD1A	HIGD1A	HIGD1A	chr3:42824399-42846027	Barretts	Cancer	OK	123.973	52.8372	-1.2304	-1.16125	5e-05	0.00245342	yes
SCD	SCD	SCD	chr10:102106771-102124588	Barretts	Cancer	OK	78.728	33.5181	-1.23194	-0.894281	0.0019	0.0344195	yes
MAPK3	MAPK3	MAPK3	chr16:30125425-30134630	Barretts	Cancer	OK	81.144	34.5448	-1.23201	-1.25108	5e-05	0.00245342	yes
FBP1	FBP1	FBP1	chr9:97365420-97402531	Barretts	Cancer	OK	54.0738	23.0148	-1.23237	-1.06668	0.00065	0.016698	yes
CAPN8	CAPN8	CAPN8	chr1:223714971-223853436	Barretts	Cancer	OK	54.8417	23.3096	-1.23435	-1.13052	5e-05	0.00245342	yes
FBN2	FBN2	FBN2	chr5:127593600-127873735	Barretts	Cancer	OK	1.83393	0.775493	-1.24176	-0.942519	0.0002	0.00712324	yes
FENDRR	FENDRR	FENDRR	chr16:86508130-86542466	Barretts	Cancer	OK	14.8276	6.26701	-1.24244	-1.0192	0.00125	0.0261522	yes
PMM1	PMM1	PMM1	chr22:41972889-41985871	Barretts	Cancer	OK	18.1987	7.63293	-1.25353	-0.960824	0.0001	0.00419723	yes
ACADVL	ACADVL	ACADVL	chr17:7093209-7128586	Barretts	Cancer	OK	112.799	47.2481	-1.25542	-1.11762	0.0002	0.00712324	yes
SLC45A3	SLC45A3	SLC45A3	chr1:205626980-205649630	Barretts	Cancer	OK	15.079	6.30055	-1.25899	-1.0234	0.0017	0.0322976	yes
GPR126	GPR126	GPR126	chr6:142623055-142767403	Barretts	Cancer	OK	31.9687	13.3498	-1.25984	-1.12225	0.0003	0.00960634	yes
TTC39A	TTC39A	TTC39A	chr1:51752929-51810785	Barretts	Cancer	OK	45.2197	18.8777	-1.26027	-1.2006	0.00015	0.00568375	yes
SLC25A1	SLC25A1	SLC25A1	chr22:19163087-19166338	Barretts	Cancer	OK	57.8584	24.109	-1.26295	-1.23556	5e-05	0.00245342	yes
PROM2	PROM2	PROM2	chr2:95940200-95957055	Barretts	Cancer	OK	20.3156	8.45622	-1.26451	-1.20876	0.00015	0.00568375	yes
TAX1BP3	TAX1BP3	TAX1BP3	chr17:3539761-3599698	Barretts	Cancer	OK	114.378	47.5609	-1.26597	-1.08169	0.0006	0.0157396	yes
ACE	ACE	ACE	chr17:61554421-61575741	Barretts	Cancer	OK	11.3725	4.7277	-1.26634	-0.992475	0.0003	0.00960634	yes
EPHX2	EPHX2	EPHX2	chr8:27348518-27402439	Barretts	Cancer	OK	30.6691	12.6822	-1.27398	-1.12305	0.0004	0.0119396	yes
AGMO	AGMO	AGMO	chr7:15239942-15601640	Barretts	Cancer	OK	5.43961	2.24571	-1.27633	-0.768426	0.00305	0.0470645	yes
ENTPD5	ENTPD5	ENTPD5	chr14:74433180-74486026	Barretts	Cancer	OK	49.4652	20.3706	-1.27993	-1.04795	0.0008	0.0192806	yes
ETHE1	ETHE1	ETHE1	chr19:44010870-44031396	Barretts	Cancer	OK	130.34	53.4076	-1.28716	-1.03926	0.00045	0.0129777	yes
CBR1	CBR1	CBR1	chr21:37441939-37498938	Barretts	Cancer	OK	97.8914	40.0092	-1.29085	-1.13986	5e-05	0.00245342	yes
HSD17B11	HSD17B11	HSD17B11	chr4:88257690-88312455	Barretts	Cancer	OK	130.222	53.2087	-1.29124	-1.15709	5e-05	0.00245342	yes
NT5E	NT5E	NT5E	chr6:86159301-86205509	Barretts	Cancer	OK	46.5021	18.9648	-1.29397	-1.14864	5e-05	0.00245342	yes
SMIM14	SMIM14	SMIM14	chr4:39529458-39640481	Barretts	Cancer	OK	63.7122	25.9667	-1.2949	-1.20093	5e-05	0.00245342	yes
IL20RA	IL20RA	IL20RA	chr6:137321107-137366298	Barretts	Cancer	OK	10.0249	4.0817	-1.29635	-1.0829	0.0001	0.00419723	yes
SLC46A3	SLC46A3	SLC46A3	chr13:29274217-29293150	Barretts	Cancer	OK	23.4554	9.54425	-1.29721	-1.05265	0.00025	0.00848321	yes
IGSF9	IGSF9	IGSF9	chr1:159896828-159915386	Barretts	Cancer	OK	6.7528	2.74119	-1.30068	-1.04997	0.00035	0.0107773	yes
SLC25A20	SLC25A20	SLC25A20	chr3:48894355-48936426	Barretts	Cancer	OK	33.4485	13.574	-1.3011	-1.25659	5e-05	0.00245342	yes
CTNNBIP1	CTNNBIP1	CTNNBIP1	chr1:9908333-9970316	Barretts	Cancer	OK	24.8704	10.0823	-1.3026	-1.21915	0.0003	0.00960634	yes
ABAT	ABAT	ABAT	chr16:8768443-8878432	Barretts	Cancer	OK	14.6971	5.95095	-1.30434	-1.21601	5e-05	0.00245342	yes
CACFD1	CACFD1	CACFD1	chr9:136325086-136335909	Barretts	Cancer	OK	18.6504	7.54412	-1.30578	-1.15141	0.0005	0.0140629	yes
TBX3	TBX3	TBX3	chr12:115108058-115121969	Barretts	Cancer	OK	15.4958	6.25813	-1.30807	-1.06854	0.00135	0.0275679	yes
KIAA1161	KIAA1161	KIAA1161	chr9:34368906-34376894	Barretts	Cancer	OK	18.2666	7.34929	-1.31353	-1.24721	0.0001	0.00419723	yes
LOC100505989	LOC100505989	LOC100505989	chr4:165675282-165724947	Barretts	Cancer	OK	23.9031	9.60205	-1.31578	-1.04932	0.00095	0.0218532	yes
CFI	CFI	CFI	chr4:110661847-110723335	Barretts	Cancer	OK	62.3502	25.0392	-1.31621	-1.03846	0.0007	0.0175528	yes
RORC	RORC	RORC	chr1:151778546-151804348	Barretts	Cancer	OK	10.5494	4.22263	-1.32095	-1.07245	0.0005	0.0140629	yes
PLCD3	PLCD3	PLCD3	chr17:43189007-43209891	Barretts	Cancer	OK	33.3458	13.3069	-1.32533	-1.23169	5e-05	0.00245342	yes
GPR153	GPR153	GPR153	chr1:6307405-6321035	Barretts	Cancer	OK	7.70012	3.07137	-1.326	-1.04951	0.00015	0.00568375	yes
RCAN2	RCAN2	RCAN2	chr6:46188466-46459804	Barretts	Cancer	OK	14.225	5.67291	-1.32627	-1.07541	0.0003	0.00960634	yes
FRMD6	FRMD6	FRMD6	chr14:51921229-52197444	Barretts	Cancer	OK	17.0038	6.77537	-1.32749	-1.10185	0.00035	0.0107773	yes
RIPK3	RIPK3	RIPK3	chr14:24805226-24809242	Barretts	Cancer	OK	26.9615	10.6662	-1.33786	-1.23902	5e-05	0.00245342	yes
KIAA1211	KIAA1211	KIAA1211	chr4:57036360-57196890	Barretts	Cancer	OK	17.2996	6.82919	-1.34095	-1.26308	5e-05	0.00245342	yes
ACER2	ACER2	ACER2	chr9:19408924-19452500	Barretts	Cancer	OK	76.6314	30.172	-1.34472	-0.908402	0.00265	0.0429319	yes
FAM214B	FAM214B	FAM214B	chr9:35104117-35115893	Barretts	Cancer	OK	12.8827	5.06406	-1.34707	-1.08159	0.0011	0.0237047	yes
RAB27A	RAB27A	RAB27A	chr15:55495163-55582013	Barretts	Cancer	OK	51.9959	20.4019	-1.34969	-1.1871	0.0002	0.00712324	yes
BCAR3	BCAR3	BCAR3	chr1:94027342-94312706	Barretts	Cancer	OK	15.2848	5.97907	-1.35411	-1.1749	0.0009	0.0210221	yes
PLCD1	PLCD1	PLCD1	chr3:38048986-38071154	Barretts	Cancer	OK	11.2665	4.40551	-1.35466	-1.07512	0.0011	0.0237047	yes
RIPK4	RIPK4	RIPK4	chr21:43159528-43187249	Barretts	Cancer	OK	19.4641	7.58836	-1.35895	-1.19041	5e-05	0.00245342	yes
HMGCR	HMGCR	HMGCR	chr5:74632992-74657926	Barretts	Cancer	OK	56.1289	21.8722	-1.35965	-1.3204	5e-05	0.00245342	yes
NEURL	NEURL	NEURL	chr10:105253734-105352309	Barretts	Cancer	OK	2.18827	0.850606	-1.36323	-0.79728	0.0021	0.0366787	yes
C19orf77	C19orf77	C19orf77	chr19:3474404-3480540	Barretts	Cancer	OK	260.375	100.991	-1.36637	-1.00441	0.0001	0.00419723	yes
CFTR	CFTR	CFTR	chr7:117120016-117308718	Barretts	Cancer	OK	34.6671	13.4448	-1.36652	-1.07033	0.0008	0.0192806	yes
ELOVL6	ELOVL6	ELOVL6	chr4:110970228-111119820	Barretts	Cancer	OK	40.219	15.5775	-1.36841	-1.2769	0.0001	0.00419723	yes
SCIN	SCIN	SCIN	chr7:12610202-12693228	Barretts	Cancer	OK	28.6425	11.0833	-1.36977	-1.15257	0.001	0.022399	yes
MBOAT2	MBOAT2	MBOAT2	chr2:8996700-9143876	Barretts	Cancer	OK	39.8262	15.3558	-1.37494	-1.23003	5e-05	0.00245342	yes
C1orf115	C1orf115	C1orf115	chr1:220863627-220872499	Barretts	Cancer	OK	41.5999	16.0277	-1.37601	-1.21829	5e-05	0.00245342	yes
TMPRSS11E	TMPRSS11E	TMPRSS11E	chr4_ctg9_hap1:143088-193241	Barretts	Cancer	OK	65.967	25.4058	-1.37659	-0.708976	0.002	0.0354772	yes
MVD	MVD	MVD	chr16:88718347-88729495	Barretts	Cancer	OK	28.5046	10.9519	-1.38001	-1.26192	5e-05	0.00245342	yes
GGT6	GGT6	GGT6	chr17:4460221-4463876	Barretts	Cancer	OK	26.7404	10.163	-1.39569	-1.15014	0.0004	0.0119396	yes
ANK3	ANK3	ANK3	chr10:61786055-62493284	Barretts	Cancer	OK	21.7646	8.21852	-1.40503	-1.23443	0.0001	0.00419723	yes
ACAA1	ACAA1	ACAA1	chr3:38080695-38178733	Barretts	Cancer	OK	59.0076	22.2113	-1.40961	-1.43164	5e-05	0.00245342	yes
PIEZO2	PIEZO2	PIEZO2	chr18:10670243-11148761	Barretts	Cancer	OK	3.60986	1.35064	-1.4183	-1.14052	0.00035	0.0107773	yes
CLRN3	CLRN3	CLRN3	chr10:129676113-129691211	Barretts	Cancer	OK	60.9399	22.7224	-1.42327	-1.10519	0.00045	0.0129777	yes
DUSP5	DUSP5	DUSP5	chr10:112257624-112271302	Barretts	Cancer	OK	26.2574	9.78924	-1.42346	-1.01194	0.00035	0.0107773	yes
NR3C2	NR3C2	NR3C2	chr4:148999914-149363672	Barretts	Cancer	OK	15.9396	5.92639	-1.42739	-1.33797	5e-05	0.00245342	yes
KCNK5	KCNK5	KCNK5	chr6:39156746-39197251	Barretts	Cancer	OK	41.0439	15.2118	-1.43198	-1.43228	5e-05	0.00245342	yes
KLF4	KLF4	KLF4	chr9:110247132-110252047	Barretts	Cancer	OK	71.5924	26.5072	-1.43342	-1.36275	5e-05	0.00245342	yes
SEPP1	SEPP1	SEPP1	chr5:42756919-42812024	Barretts	Cancer	OK	323.525	119.175	-1.44079	-0.92196	0.002	0.0354772	yes
LNX1	LNX1	LNX1	chr4:54326436-54457753	Barretts	Cancer	OK	18.1584	6.6853	-1.44158	-1.34936	5e-05	0.00245342	yes
SLC4A4	SLC4A4	SLC4A4	chr4:72053002-72437804	Barretts	Cancer	OK	38.7639	14.2697	-1.44176	-1.25245	5e-05	0.00245342	yes
ASAP3	ASAP3	ASAP3	chr1:23755055-23810750	Barretts	Cancer	OK	8.62297	3.17072	-1.44337	-1.14926	0.00015	0.00568375	yes
CCDC64B	CCDC64B	CCDC64B	chr16:3077867-3089133	Barretts	Cancer	OK	21.2685	7.79618	-1.44788	-1.14312	0.00035	0.0107773	yes
FNDC4	FNDC4	FNDC4	chr2:27714749-27718126	Barretts	Cancer	OK	6.50629	2.38378	-1.44858	-0.895682	0.00295	0.0459897	yes
NHSL1	NHSL1	NHSL1	chr6:138743180-138893668	Barretts	Cancer	OK	32.1734	11.7829	-1.44918	-1.17055	0.0002	0.00712324	yes
PDGFD	PDGFD	PDGFD	chr11:103777913-104035027	Barretts	Cancer	OK	12.1496	4.43721	-1.45318	-1.21114	0.00035	0.0107773	yes
SLC6A8	SLC6A8	SLC6A8	chrX:152953751-152962048	Barretts	Cancer	OK	26.0775	9.51721	-1.4542	-1.30103	5e-05	0.00245342	yes
TDP2	TDP2	TDP2	chr6:24650204-24667115	Barretts	Cancer	OK	79.5866	29.0427	-1.45435	-1.39118	5e-05	0.00245342	yes
FAM83E	FAM83E	FAM83E	chr19:49103856-49116694	Barretts	Cancer	OK	29.2979	10.6672	-1.45761	-1.2765	5e-05	0.00245342	yes
CKMT1A	CKMT1A	CKMT1A	chr15:43985083-43991420	Barretts	Cancer	OK	15.7074	5.6978	-1.46296	-1.16681	0.0001	0.00419723	yes
MYO7B	MYO7B	MYO7B	chr2:128293377-128395303	Barretts	Cancer	OK	20.755	7.52848	-1.46303	-1.26084	5e-05	0.00245342	yes
MAOB	MAOB	MAOB	chrX:43625856-43741721	Barretts	Cancer	OK	16.8873	6.11651	-1.46516	-1.18648	5e-05	0.00245342	yes
INSIG1	INSIG1	INSIG1	chr7:155089485-155101945	Barretts	Cancer	OK	53.1863	19.1948	-1.47034	-1.43639	5e-05	0.00245342	yes
CES3	CES3	CES3	chr16:66995131-67009052	Barretts	Cancer	OK	9.6722	3.48451	-1.47289	-1.24968	5e-05	0.00245342	yes
ATP7B	ATP7B	ATP7B	chr13:52506805-52585630	Barretts	Cancer	OK	20.331	7.29748	-1.47821	-1.30022	5e-05	0.00245342	yes
SULT1A1	SULT1A1	SULT1A1	chr16:28616907-28634907	Barretts	Cancer	OK	45.3252	16.2557	-1.47937	-1.06225	0.00065	0.016698	yes
DHCR24	DHCR24	DHCR24	chr1:55315299-55352921	Barretts	Cancer	OK	136.005	48.7282	-1.48084	-1.19912	0.0001	0.00419723	yes
RAB27B	RAB27B	RAB27B	chr18:52495707-52562747	Barretts	Cancer	OK	90.4172	32.2256	-1.48839	-1.06456	5e-05	0.00245342	yes
TTC22	TTC22	TTC22	chr1:55246751-55266941	Barretts	Cancer	OK	22.4916	7.99582	-1.49207	-1.24159	5e-05	0.00245342	yes
BARX2	BARX2	BARX2	chr11:129245880-129322174	Barretts	Cancer	OK	23.5878	8.38121	-1.49281	-1.22485	5e-05	0.00245342	yes
GABRE	GABRE	GABRE	chrX:151121595-151143151	Barretts	Cancer	OK	1.82329	0.646978	-1.49476	-0.789505	0.0021	0.0366787	yes
SMPD3	SMPD3	SMPD3	chr16:68392229-68482409	Barretts	Cancer	OK	28.2001	9.94971	-1.50298	-1.43393	5e-05	0.00245342	yes
PHYH	PHYH	PHYH	chr10:13319795-13342130	Barretts	Cancer	OK	47.2711	16.6368	-1.50658	-1.43471	5e-05	0.00245342	yes
CAPN6	CAPN6	CAPN6	chrX:110488326-110513774	Barretts	Cancer	OK	7.05858	2.47856	-1.50987	-0.911938	0.00315	0.0480639	yes
MOGAT3	MOGAT3	MOGAT3	chr7:100839012-100844302	Barretts	Cancer	OK	7.77324	2.72692	-1.51124	-0.882518	0.00085	0.0202001	yes
MT1F	MT1F	MT1F	chr16:56691854-56693215	Barretts	Cancer	OK	41.4538	14.5375	-1.51172	-0.932107	0.00305	0.0470645	yes
DQX1	DQX1	DQX1	chr2:74745257-74753408	Barretts	Cancer	OK	11.617	4.07375	-1.51181	-1.18587	0.0001	0.00419723	yes
DSC2	DSC2	DSC2	chr18:28645941-28682388	Barretts	Cancer	OK	133.616	46.7873	-1.5139	-0.946833	0.00145	0.0289173	yes
SLC35G1	SLC35G1	SLC35G1	chr10:95653729-95662491	Barretts	Cancer	OK	10.9478	3.82614	-1.51669	-1.03885	0.00095	0.0218532	yes
DMKN	DMKN	DMKN	chr19:35988118-36004560	Barretts	Cancer	OK	84.1766	29.3962	-1.51779	-0.992158	0.0006	0.0157396	yes
TCF21	TCF21	TCF21	chr6:134210258-134216675	Barretts	Cancer	OK	12.6365	4.4105	-1.51858	-0.954128	0.0028	0.044361	yes
TRANK1	TRANK1	TRANK1	chr3:36868307-36986548	Barretts	Cancer	OK	14.2454	4.95448	-1.52369	-1.34068	5e-05	0.00245342	yes
VIPR1	VIPR1	VIPR1	chr3:42530790-42579065	Barretts	Cancer	OK	13.2263	4.58607	-1.52808	-1.20285	0.00055	0.014886	yes
PPP1R14D	PPP1R14D	PPP1R14D	chr15:41107642-41120907	Barretts	Cancer	OK	32.5275	11.2509	-1.53161	-1.00026	0.00275	0.0437722	yes
F13A1	F13A1	F13A1	chr6:6144310-6320924	Barretts	Cancer	OK	22.2879	7.70782	-1.53187	-1.21636	0.0002	0.00712324	yes
ADH1C	ADH1C	ADH1C	chr4:100257648-100273917	Barretts	Cancer	OK	233.983	80.7898	-1.53416	-0.882534	0.00315	0.0480639	yes
HYAL1	HYAL1	HYAL1	chr3:50337319-50349812	Barretts	Cancer	OK	40.4255	13.9109	-1.53905	-1.23372	0.0006	0.0157396	yes
GALNT7	GALNT7	GALNT7	chr4:174089903-174245118	Barretts	Cancer	OK	128.188	44.0403	-1.54137	-1.21892	5e-05	0.00245342	yes
GAL3ST1	GAL3ST1	GAL3ST1	chr22:30950623-30960876	Barretts	Cancer	OK	4.86324	1.66636	-1.54522	-0.956197	0.0018	0.0333611	yes
SDR16C5	SDR16C5	SDR16C5	chr8:57212569-57233241	Barretts	Cancer	OK	38.3088	13.0049	-1.55862	-1.45898	5e-05	0.00245342	yes
HOXB13	HOXB13	HOXB13	chr17:46802126-46806111	Barretts	Cancer	OK	5.24075	1.76593	-1.56934	-0.98468	0.0017	0.0322976	yes
MT1M	MT1M	MT1M	chr16:56666533-56667898	Barretts	Cancer	OK	42.0372	14.0427	-1.58184	-0.938306	0.0002	0.00712324	yes
SYTL5	SYTL5	SYTL5	chrX:37865834-37988073	Barretts	Cancer	OK	16.6921	5.53757	-1.59184	-1.32017	5e-05	0.00245342	yes
VSIG2	VSIG2	VSIG2	chr11:124617369-124622109	Barretts	Cancer	OK	247.319	81.7891	-1.59639	-1.10984	0.00075	0.0185005	yes
MIA2	MIA2	MIA2	chr14:39703124-39722575	Barretts	Cancer	OK	15.6061	5.14031	-1.60218	-1.2456	5e-05	0.00245342	yes
EHD3	EHD3	EHD3	chr2:31456879-31491260	Barretts	Cancer	OK	10.7189	3.52338	-1.60512	-1.19831	5e-05	0.00245342	yes
TMEM150B	TMEM150B	TMEM150B	chr19:55824226-55836708	Barretts	Cancer	OK	12.8291	4.20413	-1.60954	-0.948686	0.0003	0.00960634	yes
IL1R2	IL1R2	IL1R2	chr2:102608305-102644884	Barretts	Cancer	OK	82.3535	26.8974	-1.61436	-1.3441	0.0003	0.00960634	yes
HMGCS1	HMGCS1	HMGCS1	chr5:43287571-43313614	Barretts	Cancer	OK	63.1737	20.6076	-1.61615	-1.45615	5e-05	0.00245342	yes
STAP2	STAP2	STAP2	chr19:4324039-4338847	Barretts	Cancer	OK	72.4919	23.5237	-1.62371	-1.558	5e-05	0.00245342	yes
GALNT6	GALNT6	GALNT6	chr12:51745832-51909547	Barretts	Cancer	OK	48.6031	15.6955	-1.6307	-1.41696	5e-05	0.00245342	yes
RHOV	RHOV	RHOV	chr15:41164411-41166487	Barretts	Cancer	OK	18.3556	5.91861	-1.63289	-0.964773	0.00275	0.0437722	yes
CHRNA7	CHRNA7	CHRNA7	chr15:32322685-32462384	Barretts	Cancer	OK	2.89975	0.933757	-1.63481	-1.01259	0.00055	0.014886	yes
AIM1L	AIM1L	AIM1L	chr1:26648349-26680621	Barretts	Cancer	OK	10.402	3.34224	-1.63797	-1.30385	5e-05	0.00245342	yes
SULT1E1	SULT1E1	SULT1E1	chr4:70706929-70725870	Barretts	Cancer	OK	20.1389	6.45407	-1.6417	-1.04091	0.001	0.022399	yes
PHLPP2	PHLPP2	PHLPP2	chr16:71678851-71748704	Barretts	Cancer	OK	8.68158	2.78102	-1.64235	-1.00877	0.00265	0.0429319	yes
P2RY1	P2RY1	P2RY1	chr3:152552735-152555843	Barretts	Cancer	OK	6.93595	2.22102	-1.64287	-0.995197	0.00185	0.0337829	yes
IL36A	IL36A	IL36A	chr2:113763448-113765621	Barretts	Cancer	OK	93.8378	30.0029	-1.64507	-0.912991	0.0004	0.0119396	yes
MGLL	MGLL	MGLL	chr3:127407904-127542093	Barretts	Cancer	OK	69.1519	22.0651	-1.648	-1.48059	5e-05	0.00245342	yes
VILL	VILL	VILL	chr3:38035077-38048676	Barretts	Cancer	OK	62.0862	19.8021	-1.64862	-1.57755	5e-05	0.00245342	yes
PLA2G4F	PLA2G4F	PLA2G4F	chr15:42433331-42448839	Barretts	Cancer	OK	12.5186	3.99242	-1.64874	-1.40944	5e-05	0.00245342	yes
BAIAP2L2	BAIAP2L2	BAIAP2L2	chr22:38480895-38506676	Barretts	Cancer	OK	21.0182	6.69544	-1.65039	-1.31586	5e-05	0.00245342	yes
TPRG1	TPRG1	TPRG1	chr3:188889762-189041271	Barretts	Cancer	OK	6.70936	2.13536	-1.6517	-1.01225	0.0009	0.0210221	yes
GSTA1	GSTA1	GSTA1	chr6:52656177-52668664	Barretts	Cancer	OK	63.4415	20.1437	-1.6551	-1.28295	5e-05	0.00245342	yes
C2orf54	C2orf54	C2orf54	chr2:241825464-241835573	Barretts	Cancer	OK	17.2108	5.41601	-1.66801	-1.21831	0.0001	0.00419723	yes
CRYL1	CRYL1	CRYL1	chr13:20977805-21100012	Barretts	Cancer	OK	65.4882	20.5918	-1.66917	-1.49075	5e-05	0.00245342	yes
DPP4	DPP4	DPP4	chr2:162848754-162931052	Barretts	Cancer	OK	84.393	26.4433	-1.67422	-1.14141	0.00015	0.00568375	yes
CLDN11	CLDN11	CLDN11	chr3:170136652-170152479	Barretts	Cancer	OK	3.42593	1.07196	-1.67624	-1.09379	0.00175	0.032836	yes
LSS	LSS	LSS	chr21:47608359-47648738	Barretts	Cancer	OK	27.0065	8.42531	-1.6805	-1.60918	5e-05	0.00245342	yes
PRKACB	PRKACB	PRKACB	chr1:84543744-84704181	Barretts	Cancer	OK	41.2082	12.8397	-1.68232	-1.47429	5e-05	0.00245342	yes
FKBP1B	FKBP1B	FKBP1B	chr2:24272583-24286550	Barretts	Cancer	OK	16.6154	5.17632	-1.68252	-1.12424	0.0032	0.0487179	yes
ZBTB7C	ZBTB7C	ZBTB7C	chr18:45553638-45663680	Barretts	Cancer	OK	31.3596	9.67083	-1.6972	-1.444	5e-05	0.00245342	yes
SPINK5	SPINK5	SPINK5	chr5:147443534-147516925	Barretts	Cancer	OK	268.572	82.3674	-1.70517	-0.470967	0.0033	0.0497407	yes
DHRS11	DHRS11	DHRS11	chr17:34948225-34957233	Barretts	Cancer	OK	30.4758	9.32002	-1.70926	-1.32137	5e-05	0.00245342	yes
IVL	IVL	IVL	chr1:152881038-152884362	Barretts	Cancer	OK	73.2261	22.3938	-1.70926	-0.92023	0.0013	0.0269503	yes
CES2	CES2	CES2	chr16:66968346-66978994	Barretts	Cancer	OK	197.298	60.2526	-1.71128	-1.11664	0.0001	0.00419723	yes
TEF	TEF	TEF	chr22:41763336-41795332	Barretts	Cancer	OK	11.7466	3.57637	-1.71567	-1.61627	5e-05	0.00245342	yes
REP15	REP15	REP15	chr12:27849427-27850566	Barretts	Cancer	OK	32.561	9.77496	-1.73598	-1.13729	0.00015	0.00568375	yes
ELOVL4	ELOVL4	ELOVL4	chr6:80624528-80657315	Barretts	Cancer	OK	3.33683	0.995116	-1.74554	-0.860127	0.00165	0.0316119	yes
TST	TST	TST	chr22:37406899-37425863	Barretts	Cancer	OK	130.18	38.7129	-1.74963	-1.21851	0.001	0.022399	yes
ANXA10	ANXA10	ANXA10	chr4:169013687-169108893	Barretts	Cancer	OK	286.836	85.0475	-1.75388	-1.00425	0.00235	0.0394297	yes
CYBRD1	CYBRD1	CYBRD1	chr2:172378756-172414643	Barretts	Cancer	OK	55.4361	16.2916	-1.7667	-1.25674	0.00165	0.0316119	yes
KRT10	KRT10	KRT10	chr17:38974368-38992526	Barretts	Cancer	OK	28.1677	8.26602	-1.76878	-1.13095	0.00025	0.00848321	yes
SLC17A4	SLC17A4	SLC17A4	chr6:25754926-25781403	Barretts	Cancer	OK	6.0738	1.77977	-1.77091	-1.06571	5e-05	0.00245342	yes
FGFBP1	FGFBP1	FGFBP1	chr4:15937192-15940363	Barretts	Cancer	OK	68.6323	20.0218	-1.77731	-1.00481	0.00175	0.032836	yes
IRX5	IRX5	IRX5	chr16:54965110-54968395	Barretts	Cancer	OK	8.23636	2.40175	-1.77792	-1.164	0.00255	0.0417582	yes
RGS2	RGS2	RGS2	chr1:192778168-192781407	Barretts	Cancer	OK	231.786	67.2205	-1.78582	-1.16361	0.0009	0.0210221	yes
LOC729966	LOC729966	LOC729966	chr19:18360759-18366229	Barretts	Cancer	OK	30.1359	8.71767	-1.78947	-1.24048	0.00045	0.0129777	yes
PDZD3	PDZD3	PDZD3	chr11:119056165-119060932	Barretts	Cancer	OK	6.75267	1.94912	-1.79263	-1.14595	0.00285	0.0448407	yes
CYP4F12	CYP4F12	CYP4F12	chr19:15783827-15807984	Barretts	Cancer	OK	20.0102	5.72094	-1.80641	-1.44118	5e-05	0.00245342	yes
SPDEF	SPDEF	SPDEF	chr6:34505578-34524110	Barretts	Cancer	OK	20.5474	5.86913	-1.80773	-1.4719	5e-05	0.00245342	yes
CLDN15	CLDN15	CLDN15	chr7:100875372-100882101	Barretts	Cancer	OK	28.998	8.26779	-1.81038	-1.21922	0.0001	0.00419723	yes
FAT2	FAT2	FAT2	chr5:150883652-150948505	Barretts	Cancer	OK	5.14942	1.45444	-1.82394	-1.07134	0.00065	0.016698	yes
NPC1L1	NPC1L1	NPC1L1	chr7:44552134-44580914	Barretts	Cancer	OK	5.08239	1.42888	-1.83063	-1.00585	0.0003	0.00960634	yes
LY6D	LY6D	LY6D	chr8:143866297-143868008	Barretts	Cancer	OK	187.924	52.2983	-1.84531	-1.04896	0.00015	0.00568375	yes
TMEM79	TMEM79	TMEM79	chr1:156252703-156262234	Barretts	Cancer	OK	17.8608	4.94028	-1.85413	-1.18167	0.00085	0.0202001	yes
AKR7A3	AKR7A3	AKR7A3	chr1:19609056-19615280	Barretts	Cancer	OK	127.347	35.2088	-1.85476	-1.74223	5e-05	0.00245342	yes
ATP2A3	ATP2A3	ATP2A3	chr17:3827162-3867758	Barretts	Cancer	OK	72.0202	19.875	-1.85745	-1.43202	5e-05	0.00245342	yes
EREG	EREG	EREG	chr4:75230859-75254477	Barretts	Cancer	OK	13.9356	3.84244	-1.85868	-1.13172	0.00045	0.0129777	yes
ALDOC	ALDOC	ALDOC	chr17:26900132-26903951	Barretts	Cancer	OK	26.2388	7.22728	-1.86018	-1.50703	5e-05	0.00245342	yes
PADI2	PADI2	PADI2	chr1:17393255-17445948	Barretts	Cancer	OK	16.826	4.6239	-1.86351	-1.15897	0.0003	0.00960634	yes
TSPAN1	TSPAN1	TSPAN1	chr1:46640748-46651634	Barretts	Cancer	OK	331.679	90.1172	-1.87991	-1.41398	5e-05	0.00245342	yes
CDHR2	CDHR2	CDHR2	chr5:175969511-176022769	Barretts	Cancer	OK	47.9477	12.9736	-1.88588	-1.5465	5e-05	0.00245342	yes
DENND2C	DENND2C	DENND2C	chr1:115127195-115212732	Barretts	Cancer	OK	8.91267	2.40711	-1.88855	-1.21836	0.0004	0.0119396	yes
SERPINB13	SERPINB13	SERPINB13	chr18:61254533-61266433	Barretts	Cancer	OK	51.6809	13.9257	-1.89189	-1.05215	0.00025	0.00848321	yes
PKP1	PKP1	PKP1	chr1:201252579-201302121	Barretts	Cancer	OK	42.1224	11.3369	-1.89356	-1.04081	0.0001	0.00419723	yes
HIST1H3E	HIST1H3E	HIST1H3E	chr6:26225382-26225844	Barretts	Cancer	OK	28.3418	7.62298	-1.89451	-1.02471	0.0004	0.0119396	yes
DAPL1	DAPL1	DAPL1	chr2:159651828-159672496	Barretts	Cancer	OK	32.8045	8.7522	-1.90618	-1.00903	0.00035	0.0107773	yes
NMUR2	NMUR2	NMUR2	chr5:151771101-151784840	Barretts	Cancer	OK	11.2939	2.98017	-1.92207	-1.14577	5e-05	0.00245342	yes
CHP2	CHP2	CHP2	chr16:23765947-23770256	Barretts	Cancer	OK	38.1772	9.95633	-1.93903	-1.23596	0.0003	0.00960634	yes
APOBEC1	APOBEC1	APOBEC1	chr12:7801995-7818502	Barretts	Cancer	OK	31.9241	8.24938	-1.95229	-1.23297	0.00045	0.0129777	yes
PITX1	PITX1	PITX1	chr5:134363423-134369964	Barretts	Cancer	OK	63.1649	16.2743	-1.95653	-1.43988	5e-05	0.00245342	yes
SSTR1	SSTR1	SSTR1	chr14:38677203-38682268	Barretts	Cancer	OK	8.22245	2.11234	-1.96073	-1.51046	5e-05	0.00245342	yes
SYNGR1	SYNGR1	SYNGR1	chr22:39745953-39781593	Barretts	Cancer	OK	3.73113	0.953655	-1.96808	-1.00669	0.0023	0.0387816	yes
SLC6A12	SLC6A12	SLC6A12	chr12:299242-323371	Barretts	Cancer	OK	2.71048	0.692684	-1.96828	-1.2404	0.0004	0.0119396	yes
KRT15	KRT15	KRT15	chr17:39669996-39675270	Barretts	Cancer	OK	142.471	36.119	-1.97983	-1.05769	0.0002	0.00712324	yes
CALML3	CALML3	CALML3	chr10:5566923-5568225	Barretts	Cancer	OK	149.862	37.2736	-2.00741	-1.09084	0.00015	0.00568375	yes
MSMO1	MSMO1	MSMO1	chr4:166248817-166264314	Barretts	Cancer	OK	99.7968	24.795	-2.00895	-1.89546	5e-05	0.00245342	yes
MYCN	MYCN	MYCN	chr2:16080019-16087129	Barretts	Cancer	OK	5.73577	1.41956	-2.01454	-1.20126	0.00015	0.00568375	yes
KIAA1644	KIAA1644	KIAA1644	chr22:44639556-44708731	Barretts	Cancer	OK	2.02515	0.498682	-2.02184	-1.29132	5e-05	0.00245342	yes
MMP28	MMP28	MMP28	chr17:34092875-34122640	Barretts	Cancer	OK	31.0074	7.61268	-2.02614	-1.59691	0.0001	0.00419723	yes
GDPD2	GDPD2	GDPD2	chrX:69642880-69653241	Barretts	Cancer	OK	9.96572	2.42241	-2.04053	-1.38464	0.0001	0.00419723	yes
HSD17B2	HSD17B2	HSD17B2	chr16:82068857-82132139	Barretts	Cancer	OK	130.393	31.6928	-2.04064	-1.65395	5e-05	0.00245342	yes
LRRC66	LRRC66	LRRC66	chr4:52859865-52883786	Barretts	Cancer	OK	25.332	6.13309	-2.04628	-1.87149	5e-05	0.00245342	yes
FAM46B	FAM46B	FAM46B	chr1:27331510-27339333	Barretts	Cancer	OK	13.6625	3.29451	-2.05208	-1.06688	0.00055	0.014886	yes
KLK12	KLK12	KLK12	chr19:51532347-51538148	Barretts	Cancer	OK	56.2009	13.435	-2.0646	-1.40109	0.0001	0.00419723	yes
SPRR3	SPRR3	SPRR3	chr1:152974222-152976332	Barretts	Cancer	OK	4661.09	1099.92	-2.08327	-0.183684	0.0007	0.0175528	yes
SPINK7	SPINK7	SPINK7	chr5:147691989-147695481	Barretts	Cancer	OK	166.638	39.1584	-2.08932	-1.16589	5e-05	0.00245342	yes
LDHD	LDHD	LDHD	chr16:75145757-75150670	Barretts	Cancer	OK	19.9596	4.68823	-2.08997	-1.74371	5e-05	0.00245342	yes
NPDC1	NPDC1	NPDC1	chr9:139933908-139940676	Barretts	Cancer	OK	29.2135	6.85676	-2.09104	-1.69147	5e-05	0.00245342	yes
SCN7A	SCN7A	SCN7A	chr2:167260082-167343481	Barretts	Cancer	OK	3.6483	0.847421	-2.10607	-1.40058	5e-05	0.00245342	yes
RASD1	RASD1	RASD1	chr17:17397752-17399709	Barretts	Cancer	OK	6.05498	1.3741	-2.13964	-1.41096	5e-05	0.00245342	yes
DPT	DPT	DPT	chr1:168664694-168698442	Barretts	Cancer	OK	28.3993	6.43955	-2.14083	-1.3517	5e-05	0.00245342	yes
AQP5	AQP5	AQP5	chr12:50355278-50359465	Barretts	Cancer	OK	18.3043	4.14459	-2.14289	-1.28727	5e-05	0.00245342	yes
TTLL6	TTLL6	TTLL6	chr17:46839592-46894469	Barretts	Cancer	OK	7.91284	1.77742	-2.15441	-1.42856	0.0004	0.0119396	yes
BNIPL	BNIPL	BNIPL	chr1:151009028-151020076	Barretts	Cancer	OK	14.6151	3.27791	-2.15661	-1.16654	0.001	0.022399	yes
CAPN9	CAPN9	CAPN9	chr1:230883129-230937749	Barretts	Cancer	OK	31.0606	6.96494	-2.1569	-1.7053	5e-05	0.00245342	yes
B3GNT6	B3GNT6	B3GNT6	chr11:76745434-76753005	Barretts	Cancer	OK	11.5405	2.57334	-2.16498	-1.438	5e-05	0.00245342	yes
MALL	MALL	MALL	chr2:110841446-110874143	Barretts	Cancer	OK	63.1068	14.0451	-2.16773	-1.89415	5e-05	0.00245342	yes
RAB3B	RAB3B	RAB3B	chr1:52373627-52456436	Barretts	Cancer	OK	8.63761	1.91142	-2.17599	-1.2718	5e-05	0.00245342	yes
SPINK4	SPINK4	SPINK4	chr9:33240195-33248565	Barretts	Cancer	OK	281.984	61.7869	-2.19024	-1.53465	5e-05	0.00245342	yes
CRISP3	CRISP3	CRISP3	chr6:49695091-49712168	Barretts	Cancer	OK	48.1244	10.5016	-2.19616	-1.24432	0.0002	0.00712324	yes
C9orf169	C9orf169	C9orf169	chr9:140119643-140120763	Barretts	Cancer	OK	69.3124	15.0944	-2.1991	-1.18673	0.00015	0.00568375	yes
ABP1	ABP1	ABP1	chr7:150549564-150558379	Barretts	Cancer	OK	145.735	31.3752	-2.21565	-1.78739	5e-05	0.00245342	yes
ADIRF	ADIRF	ADIRF	chr10:88728187-88769960	Barretts	Cancer	OK	127.191	27.3547	-2.21713	-1.76224	5e-05	0.00245342	yes
FMO5	FMO5	FMO5	chr1:146655883-146697230	Barretts	Cancer	OK	81.4641	17.442	-2.2236	-1.96962	5e-05	0.00245342	yes
COL17A1	COL17A1	COL17A1	chr10:105791045-105845638	Barretts	Cancer	OK	85.1888	17.8785	-2.25244	-1.95872	5e-05	0.00245342	yes
ADH1B	ADH1B	ADH1B	chr4:100227526-100242572	Barretts	Cancer	OK	37.1404	7.78266	-2.25466	-1.82241	5e-05	0.00245342	yes
EMP1	EMP1	EMP1	chr12:13349601-13369708	Barretts	Cancer	OK	496.675	103.663	-2.2604	-0.662758	0.0029	0.0453657	yes
SBSN	SBSN	SBSN	chr19:36014268-36019253	Barretts	Cancer	OK	202.177	41.2027	-2.29481	-1.00123	0.0018	0.0333611	yes
TM4SF20	TM4SF20	TM4SF20	chr2:228226873-228244022	Barretts	Cancer	OK	113.079	22.9844	-2.29861	-1.41198	5e-05	0.00245342	yes
TRIM40	TRIM40	TRIM40	chr6_ssto_hap7:1434969-1446965	Barretts	Cancer	OK	4.45683	0.894436	-2.31697	-1.28095	5e-05	0.00245342	yes
SLC25A34	SLC25A34	SLC25A34	chr1:16062808-16067884	Barretts	Cancer	OK	3.6957	0.712413	-2.37506	-1.3737	5e-05	0.00245342	yes
BTNL8	BTNL8	BTNL8	chr5:180326076-180377906	Barretts	Cancer	OK	60.9707	11.5979	-2.39425	-2.00568	5e-05	0.00245342	yes
GDPD3	GDPD3	GDPD3	chr16:30116130-30124878	Barretts	Cancer	OK	44.5992	8.35553	-2.41621	-1.45695	0.0001	0.00419723	yes
FAM25A	FAM25A	FAM25A	chr10:88780045-88784487	Barretts	Cancer	OK	268.799	50.1003	-2.42363	-1.23632	5e-05	0.00245342	yes
SLC28A2	SLC28A2	SLC28A2	chr15:45544427-45568132	Barretts	Cancer	OK	44.0989	8.11926	-2.44132	-1.77392	5e-05	0.00245342	yes
CDHR5	CDHR5	CDHR5	chr11:616564-625067	Barretts	Cancer	OK	66.5221	11.9737	-2.47397	-2.01496	5e-05	0.00245342	yes
CLIC3	CLIC3	CLIC3	chr9:139889059-139891024	Barretts	Cancer	OK	47.4712	8.44214	-2.49137	-1.4642	5e-05	0.00245342	yes
MYO1A	MYO1A	MYO1A	chr12:57422300-57444549	Barretts	Cancer	OK	73.1179	12.9745	-2.49455	-2.01319	5e-05	0.00245342	yes
ACY3	ACY3	ACY3	chr11:67410025-67418130	Barretts	Cancer	OK	32.045	5.61404	-2.51299	-1.26155	5e-05	0.00245342	yes
HOPX	HOPX	HOPX	chr4:57514153-57547872	Barretts	Cancer	OK	238.551	41.7728	-2.51366	-1.27754	0.00185	0.0337829	yes
NAT2	NAT2	NAT2	chr8:18248754-18258723	Barretts	Cancer	OK	19.7966	3.42842	-2.52963	-1.50216	5e-05	0.00245342	yes
RRAD	RRAD	RRAD	chr16:66955581-66959439	Barretts	Cancer	OK	14.9037	2.57879	-2.5309	-1.30985	5e-05	0.00245342	yes
FABP2	FABP2	FABP2	chr4:120238404-120243316	Barretts	Cancer	OK	86.4654	14.7495	-2.55145	-1.49324	5e-05	0.00245342	yes
PCK1	PCK1	PCK1	chr20:56136136-56141513	Barretts	Cancer	OK	19.284	3.27631	-2.55726	-1.30226	5e-05	0.00245342	yes
SLITRK6	SLITRK6	SLITRK6	chr13:86366921-86373483	Barretts	Cancer	OK	8.71683	1.44473	-2.59301	-1.75484	5e-05	0.00245342	yes
CIDEC	CIDEC	CIDEC	chr3:9908393-9921938	Barretts	Cancer	OK	22.8253	3.78088	-2.59384	-1.65669	5e-05	0.00245342	yes
B3GALT5	B3GALT5	B3GALT5	chr21:41029253-41034815	Barretts	Cancer	OK	32.1419	5.32071	-2.59476	-2.21431	5e-05	0.00245342	yes
COL4A6	COL4A6	COL4A6	chrX:107398836-107682704	Barretts	Cancer	OK	5.48637	0.907863	-2.59531	-1.7645	5e-05	0.00245342	yes
DYNAP	DYNAP	DYNAP	chr18:52258389-52266724	Barretts	Cancer	OK	7.16075	1.17854	-2.60311	-1.30014	5e-05	0.00245342	yes
SLC16A9	SLC16A9	SLC16A9	chr10:61410521-61469649	Barretts	Cancer	OK	14.3536	2.27946	-2.65464	-1.84409	5e-05	0.00245342	yes
GPA33	GPA33	GPA33	chr1:167022081-167059868	Barretts	Cancer	OK	119.807	17.8014	-2.75065	-2.03448	5e-05	0.00245342	yes
CRNN	CRNN	CRNN	chr1:152381718-152386750	Barretts	Cancer	OK	1744.58	257.758	-2.75879	-0.227811	0.001	0.022399	yes
CHST5	CHST5	CHST5	chr16:75562427-75569068	Barretts	Cancer	OK	16.2389	2.38998	-2.76438	-1.82642	5e-05	0.00245342	yes
GJB6	GJB6	GJB6	chr13:20796100-20806534	Barretts	Cancer	OK	77.4929	11.1572	-2.79609	-1.57911	5e-05	0.00245342	yes
CRCT1	CRCT1	CRCT1	chr1:152486977-152488481	Barretts	Cancer	OK	151.345	21.6044	-2.80844	-1.47874	5e-05	0.00245342	yes
LRRC31	LRRC31	LRRC31	chr3:169557028-169587660	Barretts	Cancer	OK	32.6786	4.6643	-2.80861	-1.89017	5e-05	0.00245342	yes
KRT6C	KRT6C	KRT6C	chr12:52862299-52867569	Barretts	Cancer	OK	343.226	47.8196	-2.84348	-0.971436	0.00145	0.0289173	yes
PPP1R3C	PPP1R3C	PPP1R3C	chr10:93388196-93392858	Barretts	Cancer	OK	41.0802	5.69553	-2.85054	-2.0685	5e-05	0.00245342	yes
BTNL3	BTNL3	BTNL3	chr5:180415844-180433727	Barretts	Cancer	OK	32.7585	4.33856	-2.91658	-2.30753	5e-05	0.00245342	yes
TM4SF4	TM4SF4	TM4SF4	chr3:149192367-149221181	Barretts	Cancer	OK	165.013	21.068	-2.96945	-1.61863	5e-05	0.00245342	yes
SULT1B1	SULT1B1	SULT1B1	chr4:70592685-70626430	Barretts	Cancer	OK	86.6779	10.9022	-2.99105	-2.35428	5e-05	0.00245342	yes
RBP2	RBP2	RBP2	chr3:139171725-139195352	Barretts	Cancer	OK	112.73	14.0324	-3.00604	-1.00348	0.0009	0.0210221	yes
ZNF365	ZNF365	ZNF365	chr10:64133915-64431771	Barretts	Cancer	OK	6.20598	0.745154	-3.05805	-1.4296	5e-05	0.00245342	yes
GPT	GPT	GPT	chr8:145729464-145732555	Barretts	Cancer	OK	15.5775	1.85002	-3.07384	-1.98598	5e-05	0.00245342	yes
ADH6	ADH6	ADH6	chr4:100010007-100222513	Barretts	Cancer	OK	23.5532	2.71807	-3.11526	-1.38279	0.00055	0.014886	yes
NR1H4	NR1H4	NR1H4	chr12:100867550-100957645	Barretts	Cancer	OK	5.15735	0.575849	-3.16287	-1.49922	0.0002	0.00712324	yes
LEFTY1	LEFTY1	LEFTY1	chr1:226073981-226076846	Barretts	Cancer	OK	43.5382	4.54566	-3.25972	-1.96195	5e-05	0.00245342	yes
KRT4	KRT4	KRT4	chr12:53200326-53207900	Barretts	Cancer	OK	4343.01	450.549	-3.26894	-0.40539	5e-05	0.00245342	yes
MEP1A	MEP1A	MEP1A	chr6:46761093-46807519	Barretts	Cancer	OK	125.602	12.9361	-3.27938	-1.89836	5e-05	0.00245342	yes
ABCG2	ABCG2	ABCG2	chr4:89011415-89152474	Barretts	Cancer	OK	22.2878	2.26782	-3.29688	-2.47905	5e-05	0.00245342	yes
PHGR1	PHGR1	PHGR1	chr15:40643233-40648634	Barretts	Cancer	OK	849.545	82.3624	-3.36663	-1.88046	5e-05	0.00245342	yes
ITLN1	ITLN1	ITLN1	chr1:160846329-160854960	Barretts	Cancer	OK	213.934	19.9241	-3.42458	-2.11891	5e-05	0.00245342	yes
APOC3	APOC3	APOC3	chr11:116700623-116703787	Barretts	Cancer	OK	25.0666	2.25116	-3.47703	-1.36379	0.0005	0.0140629	yes
ALDOB	ALDOB	ALDOB	chr9:104182841-104198062	Barretts	Cancer	OK	319.875	27.3196	-3.5495	-1.18564	5e-05	0.00245342	yes
LGALS7	LGALS7	LGALS7	chr19:39261607-39264157	Barretts	Cancer	OK	21.6849	1.40487	-3.94818	-1.61793	0.00055	0.014886	yes
DSG1	DSG1	DSG1	chr18:28898051-28937393	Barretts	Cancer	OK	26.3354	1.46822	-4.16486	-2.11773	5e-05	0.00245342	yes
SLC26A3	SLC26A3	SLC26A3	chr7:107405911-107443678	Barretts	Cancer	OK	68.6636	3.61202	-4.24867	-2.2996	5e-05	0.00245342	yes
CYP3A4	CYP3A4	CYP3A4	chr7:99354582-99381811	Barretts	Cancer	OK	26.4119	0.889783	-4.89159	-2.54071	0.0006	0.0157396	yes
APOB	APOB	APOB	chr2:21224300-21266945	Barretts	Cancer	OK	61.2802	0.803646	-6.25272	-1.08923	5e-05	0.00245342	yes
ADH4	ADH4	ADH4	chr4:100010007-100222513	Barretts	Cancer	OK	53.5409	0.596332	-6.48838	-2.04965	0.0011	0.0237047	yes
DEFA6	DEFA6	DEFA6	chr8:6782215-6783598	Barretts	Cancer	OK	201.833	2.03467	-6.63222	-2.02475	5e-05	0.00245342	yes
CA1	CA1	CA1	chr8:86240457-86290342	Barretts	Cancer	OK	307.892	1.34788	-7.83559	-2.98806	0.0003	0.00960634	yes
DEFA5	DEFA5	DEFA5	chr8:6912828-6914259	Barretts	Cancer	OK	761.068	1.09443	-9.4417	-1.91462	0.00015	0.00568375	yes
BPIFB2	BPIFB2	BPIFB2	chr20:31595383-31611515	Barretts	Cancer	OK	18.8068	0.00359149	-12.3544	-0.399145	5e-05	0.00245342	yes
VTRNA1-1	VTRNA1-1	VTRNA1-1	chr5:140090860-140090958	Barretts	Cancer	OK	366.132	0	-12.3771	inf	0.00045	0.0129777	yes
