# Supplementary material for: Repurposing of KLF5 activates a cell cycle signature during the progression from a precursor state to Oesophageal Adenocarcinoma
Source: bioRxiv preprint, doi:10.1101/2020.02.10.941872, version 2 (2020-08-27)
Supplement: Supplementary Table 2 [file 941872_file06.xlsx]

## Sheet: Legend
Table S2. Differentially accessible regions within ± 250 kb of TSS of a DEG (A) Total accessible regions from BO (n=4) and OAC (n=6) samples. (B) Significantly differentially accessible open regions (+2x; Q-value<0.1). (C) Significantly differentially accessible closed regions (-2x; Q-value<0.1).

## Sheet: S2A All accessible regions 
test_id	gene_id	gene	locus	sample_1	sample_2	status	value_1	value_2	log2(fold_change)	test_stat	p_value	q_value	significant
chr10_1001091_1001592	chr10_1001091_1001592	-	chr10:1001090-1001592	Barretts	OAC	OK	35.9398	15.2188	-1.23973	-1.14407	0.0302	0.218497	no
chr10_1001659_1002160	chr10_1001659_1002160	-	chr10:1001658-1002160	Barretts	OAC	OK	23.8052	16.4702	-0.531415	-0.469599	0.33385	0.641069	no
chr10_1016605_1017106	chr10_1016605_1017106	-	chr10:1016604-1017106	Barretts	OAC	OK	28.1746	43.6652	0.632086	0.647943	0.194	0.502938	no
chr10_1017518_1018019	chr10_1017518_1018019	-	chr10:1017517-1018019	Barretts	OAC	OK	65.1778	94.2328	0.531849	0.651485	0.1829	0.489354	no
chr10_101861211_101861712	chr10_101861211_101861712	-	chr10:101861210-101861712	Barretts	OAC	OK	51.2875	37.2081	-0.462989	-0.463741	0.332	0.639431	no
chr10_101906025_101906526	chr10_101906025_101906526	-	chr10:101906024-101907018	Barretts	OAC	OK	16.4643	12.3172	-0.418667	-0.267052	0.64025	0.839638	no
chr10_101906517_101907018	chr10_101906517_101907018	-	chr10:101906024-101907018	Barretts	OAC	OK	18.5497	13.2954	-0.480469	-0.294707	0.5285	0.778849	no
chr10_101927561_101928062	chr10_101927561_101928062	-	chr10:101927560-101928062	Barretts	OAC	OK	34.0044	32.0896	-0.0836129	-0.0829252	0.8669	0.946149	no
chr10_101935568_101936069	chr10_101935568_101936069	-	chr10:101935567-101936069	Barretts	OAC	OK	42.7673	47.3651	0.147318	0.155744	0.76325	0.900366	no
chr10_101939328_101939829	chr10_101939328_101939829	-	chr10:101939327-101940186	Barretts	OAC	OK	26.3424	29.8303	0.17939	0.114314	0.8185	0.926071	no
chr10_101939685_101940186	chr10_101939685_101940186	-	chr10:101939327-101940186	Barretts	OAC	OK	33.258	59.1965	0.831812	0.714114	0.1667	0.46885	no
chr10_101943232_101943733	chr10_101943232_101943733	-	chr10:101943231-101943733	Barretts	OAC	OK	36.3791	57.8574	0.669393	0.732923	0.14165	0.434776	no
chr10_101945026_101945527	chr10_101945026_101945527	-	chr10:101945025-101946391	Barretts	OAC	OK	36.6045	39.4088	0.106498	0.0609456	0.9077	0.963768	no
chr10_101945313_101945814	chr10_101945313_101945814	-	chr10:101945025-101946391	Barretts	OAC	OK	37.7327	36.9066	-0.0319383	-0.0175707	0.9752	0.986971	no
chr10_101945621_101946122	chr10_101945621_101946122	-	chr10:101945025-101946391	Barretts	OAC	OK	122.173	163.348	0.419024	0.437354	0.37165	0.670744	no
chr10_101945890_101946391	chr10_101945890_101946391	-	chr10:101945025-101946391	Barretts	OAC	OK	40.7489	42.6455	0.0656328	0.0360546	0.9422	0.978943	no
chr10_101988592_101989093	chr10_101988592_101989093	-	chr10:101988591-101989624	Barretts	OAC	OK	22.3954	54.6141	1.28607	0.8202	0.1125	0.395385	no
chr10_101988870_101989371	chr10_101988870_101989371	-	chr10:101988591-101989624	Barretts	OAC	OK	13.1278	34.801	1.4065	0.644566	0.2549	0.567709	no
chr10_101989123_101989624	chr10_101989123_101989624	-	chr10:101988591-101989624	Barretts	OAC	OK	79.7415	68.0892	-0.227906	-0.211723	0.66485	0.851468	no
chr10_1019911_1020412	chr10_1019911_1020412	-	chr10:1019910-1020412	Barretts	OAC	OK	64.5826	206.314	1.67563	2.24605	5e-05	0.00707764	yes
chr10_102027222_102027723	chr10_102027222_102027723	-	chr10:102027221-102027723	Barretts	OAC	OK	96.5545	91.6812	-0.0747168	-0.0956974	0.8467	0.937656	no
chr10_102045733_102046234	chr10_102045733_102046234	-	chr10:102045732-102046949	Barretts	OAC	OK	39.0865	51.9473	0.410381	0.27193	0.59105	0.813146	no
chr10_102045952_102046453	chr10_102045952_102046453	-	chr10:102045732-102046949	Barretts	OAC	OK	33.0969	50.2094	0.601264	0.358906	0.47355	0.743964	no
chr10_102046211_102046712	chr10_102046211_102046712	-	chr10:102045732-102046949	Barretts	OAC	OK	81.2218	116.093	0.515343	0.462609	0.34515	0.651098	no
chr10_102046448_102046949	chr10_102046448_102046949	-	chr10:102045732-102046949	Barretts	OAC	OK	48.2036	42.9436	-0.166697	-0.095952	0.8702	0.947237	no
chr10_102059792_102060293	chr10_102059792_102060293	-	chr10:102059791-102060293	Barretts	OAC	OK	18.1675	13.3299	-0.446697	-0.376547	0.44985	0.728257	no
chr10_102060894_102061395	chr10_102060894_102061395	-	chr10:102060893-102061395	Barretts	OAC	OK	17.8669	20.5577	0.20239	0.184259	0.7109	0.875197	no
chr10_102071084_102071585	chr10_102071084_102071585	-	chr10:102071083-102071585	Barretts	OAC	OK	64.6751	62.336	-0.0531436	-0.0619085	0.8998	0.959952	no
chr10_102086687_102087188	chr10_102086687_102087188	-	chr10:102086686-102087188	Barretts	OAC	OK	28.3126	85.2735	1.59065	1.63212	0.00175	0.0625652	no
chr10_102098128_102098629	chr10_102098128_102098629	-	chr10:102098127-102098629	Barretts	OAC	OK	36.5049	30.9817	-0.236672	-0.250765	0.6155	0.826873	no
chr10_102100825_102101326	chr10_102100825_102101326	-	chr10:102100824-102101326	Barretts	OAC	OK	55.1023	28.4805	-0.952141	-1.03	0.0473	0.266302	no
chr10_102102047_102102548	chr10_102102047_102102548	-	chr10:102102046-102102548	Barretts	OAC	OK	80.6573	70.8538	-0.186959	-0.230708	0.6391	0.839234	no
chr10_102106044_102106545	chr10_102106044_102106545	-	chr10:102106043-102107045	Barretts	OAC	OK	38.1471	53.6264	0.491369	0.34346	0.48625	0.752642	no
chr10_102106544_102107045	chr10_102106544_102107045	-	chr10:102106043-102107045	Barretts	OAC	OK	93.9232	97.6922	0.0567624	0.0655212	0.8979	0.9591	no
chr10_102124506_102125007	chr10_102124506_102125007	-	chr10:102124505-102125007	Barretts	OAC	OK	103.939	207.631	0.998288	1.4153	0.0054	0.104991	no
chr10_102130307_102130808	chr10_102130307_102130808	-	chr10:102130306-102131439	Barretts	OAC	OK	49.0244	81.9552	0.741335	0.587135	0.24375	0.556532	no
chr10_102130701_102131202	chr10_102130701_102131202	-	chr10:102130306-102131439	Barretts	OAC	OK	35.4453	62.5553	0.819538	0.498254	0.33025	0.637965	no
chr10_102130938_102131439	chr10_102130938_102131439	-	chr10:102130306-102131439	Barretts	OAC	OK	78.6934	195.044	1.30948	1.42465	0.00715	0.119701	no
chr10_102132965_102133466	chr10_102132965_102133466	-	chr10:102132964-102133466	Barretts	OAC	OK	242.886	379.8	0.644961	1.08966	0.0307	0.219876	no
chr10_102193487_102193988	chr10_102193487_102193988	-	chr10:102193486-102193988	Barretts	OAC	OK	72.4762	71.9024	-0.0114674	-0.0140696	0.9861	0.989111	no
chr10_102214392_102214893	chr10_102214392_102214893	-	chr10:102214391-102214893	Barretts	OAC	OK	18.3629	29.3867	0.678367	0.63818	0.19695	0.50715	no
chr10_102241181_102241682	chr10_102241181_102241682	-	chr10:102241180-102241682	Barretts	OAC	OK	110.079	104.155	-0.0798144	-0.105901	0.82655	0.929681	no
chr10_102241891_102242392	chr10_102241891_102242392	-	chr10:102241890-102242735	Barretts	OAC	OK	22.1212	33.7048	0.607526	0.305234	0.57465	0.804829	no
chr10_102242072_102242573	chr10_102242072_102242573	-	chr10:102241890-102242735	Barretts	OAC	OK	74.4083	43.8528	-0.762794	-0.590875	0.23945	0.552816	no
chr10_102242234_102242735	chr10_102242234_102242735	-	chr10:102241890-102242735	Barretts	OAC	OK	19.0019	27.8297	0.550478	0.290908	0.57175	0.803385	no
chr10_102268407_102268908	chr10_102268407_102268908	-	chr10:102268406-102268908	Barretts	OAC	OK	36.908	23.6148	-0.644239	-0.669197	0.1794	0.485511	no
chr10_102270230_102270731	chr10_102270230_102270731	-	chr10:102270229-102271260	Barretts	OAC	OK	7.6366	19.7618	1.37171	0.591579	0.3691	0.66879	no
chr10_102270399_102270900	chr10_102270399_102270900	-	chr10:102270229-102271260	Barretts	OAC	OK	29.2066	12.6774	-1.20403	-0.593876	0.2328	0.545529	no
chr10_102270759_102271260	chr10_102270759_102271260	-	chr10:102270229-102271260	Barretts	OAC	OK	42.4048	21.8304	-0.957889	-0.656681	0.2241	0.536441	no
chr10_102278422_102278923	chr10_102278422_102278923	-	chr10:102278421-102278923	Barretts	OAC	OK	37.3445	17.2805	-1.11175	-1.10397	0.0305	0.219164	no
chr10_102278926_102279427	chr10_102278926_102279427	-	chr10:102278925-102279427	Barretts	OAC	OK	30.2381	20.2601	-0.577724	-0.579276	0.25375	0.566852	no
chr10_102288982_102289483	chr10_102288982_102289483	-	chr10:102288981-102289930	Barretts	OAC	OK	33.6912	31.4974	-0.0971392	-0.0584468	0.9142	0.966549	no
chr10_102289429_102289930	chr10_102289429_102289930	-	chr10:102288981-102289930	Barretts	OAC	OK	71.0725	64.0464	-0.150173	-0.14331	0.7675	0.902472	no
chr10_102295314_102295815	chr10_102295314_102295815	-	chr10:102295313-102295815	Barretts	OAC	OK	140.456	161.046	0.197352	0.284336	0.57265	0.803903	no
chr10_102314546_102315047	chr10_102314546_102315047	-	chr10:102314545-102315047	Barretts	OAC	OK	21.9211	37.5338	0.775869	0.688211	0.16995	0.473781	no
chr10_102321692_102322193	chr10_102321692_102322193	-	chr10:102321691-102322193	Barretts	OAC	OK	73.6213	72.542	-0.0213064	-0.0256734	0.95715	0.983211	no
chr10_102329663_102330164	chr10_102329663_102330164	-	chr10:102329662-102330358	Barretts	OAC	OK	16.8535	7.06253	-1.25479	-0.621184	0.2425	0.555658	no
chr10_102329857_102330358	chr10_102329857_102330358	-	chr10:102329662-102330358	Barretts	OAC	OK	15.1579	16.6241	0.133212	0.0801737	0.8667	0.946143	no
chr10_1030227_1030728	chr10_1030227_1030728	-	chr10:1030226-1030728	Barretts	OAC	OK	35.9057	72.2714	1.00921	1.1216	0.0279	0.210974	no
chr10_1032298_1032799	chr10_1032298_1032799	-	chr10:1032297-1032799	Barretts	OAC	OK	39.5747	76.5303	0.951454	1.05742	0.0384	0.243254	no
chr10_1033722_1034223	chr10_1033722_1034223	-	chr10:1033721-1034834	Barretts	OAC	OK	39.994	67.1512	0.74763	0.480618	0.36825	0.668223	no
chr10_1034046_1034547	chr10_1034046_1034547	-	chr10:1033721-1034834	Barretts	OAC	OK	151.137	238.969	0.660973	0.849804	0.08505	0.34863	no
chr10_1034333_1034834	chr10_1034333_1034834	-	chr10:1033721-1034834	Barretts	OAC	OK	44.9551	60.2682	0.422913	0.264673	0.6282	0.833467	no
chr10_103911088_103911589	chr10_103911088_103911589	-	chr10:103911087-103912696	Barretts	OAC	OK	31.5247	46.3047	0.554677	0.272051	0.73195	0.88666	no
chr10_103911257_103911758	chr10_103911257_103911758	-	chr10:103911087-103912696	Barretts	OAC	OK	20.8692	64.1652	1.62041	0.728723	0.24345	0.556416	no
chr10_103911538_103912039	chr10_103911538_103912039	-	chr10:103911087-103912696	Barretts	OAC	OK	51.5067	119.918	1.21922	0.761872	0.18295	0.489375	no
chr10_103911778_103912279	chr10_103911778_103912279	-	chr10:103911087-103912696	Barretts	OAC	OK	184.859	347.356	0.909991	1.07161	0.02875	0.213872	no
chr10_103912195_103912696	chr10_103912195_103912696	-	chr10:103911087-103912696	Barretts	OAC	OK	42.9959	74.9748	0.802206	0.429071	0.4255	0.711831	no
chr10_103929149_103929650	chr10_103929149_103929650	-	chr10:103929148-103929898	Barretts	OAC	OK	68.3319	82.5583	0.272856	0.284797	0.57175	0.803385	no
chr10_103929397_103929898	chr10_103929397_103929898	-	chr10:103929148-103929898	Barretts	OAC	OK	15.9735	30.1354	0.915783	0.440032	0.41775	0.70592	no
chr10_103948232_103948733	chr10_103948232_103948733	-	chr10:103948231-103949105	Barretts	OAC	OK	29.9688	28.7778	-0.0585028	-0.0484809	0.92175	0.970026	no
chr10_103948604_103949105	chr10_103948604_103949105	-	chr10:103948231-103949105	Barretts	OAC	OK	28.1019	13.3916	-1.06933	-0.676411	0.1785	0.484468	no
chr10_103985730_103986231	chr10_103985730_103986231	-	chr10:103985729-103986231	Barretts	OAC	OK	191.157	276.798	0.534074	0.85482	0.0877	0.353089	no
chr10_103989458_103989959	chr10_103989458_103989959	-	chr10:103989457-103989959	Barretts	OAC	OK	61.5599	77.3183	0.328818	0.390204	0.4357	0.719152	no
chr10_103990122_103990623	chr10_103990122_103990623	-	chr10:103990121-103990623	Barretts	OAC	OK	61.6249	50.5602	-0.285511	-0.328963	0.51455	0.769031	no
chr10_103991491_103991992	chr10_103991491_103991992	-	chr10:103991490-103991992	Barretts	OAC	OK	55.8331	62.248	0.156907	0.181186	0.71445	0.877365	no
chr10_103995216_103995717	chr10_103995216_103995717	-	chr10:103995215-103995717	Barretts	OAC	OK	56.1267	54.4577	-0.0435513	-0.0496488	0.91715	0.968052	no
chr10_104001182_104001683	chr10_104001182_104001683	-	chr10:104001181-104001683	Barretts	OAC	OK	89.7299	131.441	0.550754	0.723909	0.14355	0.437676	no
chr10_104004913_104005414	chr10_104004913_104005414	-	chr10:104004912-104005741	Barretts	OAC	OK	347.257	580.863	0.742192	1.30485	0.0099	0.134768	no
chr10_104005240_104005741	chr10_104005240_104005741	-	chr10:104004912-104005741	Barretts	OAC	OK	49.837	95.3321	0.935744	0.589981	0.2489	0.56233	no
chr10_104028709_104029210	chr10_104028709_104029210	-	chr10:104028708-104029210	Barretts	OAC	OK	12.8311	8.27803	-0.632281	-0.497307	0.3372	0.643643	no
chr10_104070220_104070721	chr10_104070220_104070721	-	chr10:104070219-104070947	Barretts	OAC	OK	13.0778	18.6337	0.510788	0.312474	0.54745	0.789698	no
chr10_104070446_104070947	chr10_104070446_104070947	-	chr10:104070219-104070947	Barretts	OAC	OK	12.7403	9.42336	-0.435084	-0.224818	0.6835	0.861101	no
chr10_104106964_104107465	chr10_104106964_104107465	-	chr10:104106963-104107465	Barretts	OAC	OK	26.9931	21.1792	-0.349942	-0.334559	0.50455	0.763234	no
chr10_104127761_104128262	chr10_104127761_104128262	-	chr10:104127760-104128262	Barretts	OAC	OK	23.6758	18.23	-0.377096	-0.35557	0.4764	0.746354	no
chr10_104134948_104135449	chr10_104134948_104135449	-	chr10:104134947-104135449	Barretts	OAC	OK	17.4712	16.5778	-0.0757201	-0.0680226	0.882	0.95178	no
chr10_104153592_104154093	chr10_104153592_104154093	-	chr10:104153591-104154971	Barretts	OAC	OK	58.5099	153.092	1.38765	0.999657	0.0469	0.265381	no
chr10_104153881_104154382	chr10_104153881_104154382	-	chr10:104153591-104154971	Barretts	OAC	OK	125.928	297.909	1.24227	1.35482	0.00955	0.132755	no
chr10_104154097_104154598	chr10_104154097_104154598	-	chr10:104153591-104154971	Barretts	OAC	OK	92.3079	167.142	0.856551	0.753182	0.1599	0.460359	no
chr10_104154470_104154971	chr10_104154470_104154971	-	chr10:104153591-104154971	Barretts	OAC	OK	54.202	78.1727	0.528317	0.313384	0.53825	0.784782	no
chr10_104155181_104155682	chr10_104155181_104155682	-	chr10:104155180-104155682	Barretts	OAC	OK	111.404	213.029	0.935246	1.32687	0.00765	0.122365	no
chr10_104159132_104159633	chr10_104159132_104159633	-	chr10:104159131-104159633	Barretts	OAC	OK	105.54	198.403	0.910641	1.27538	0.0102	0.136609	no
chr10_104180315_104180816	chr10_104180315_104180816	-	chr10:104180314-104181466	Barretts	OAC	OK	80.4949	133.964	0.734877	0.637557	0.20255	0.513946	no
chr10_104180657_104181158	chr10_104180657_104181158	-	chr10:104180314-104181466	Barretts	OAC	OK	128.211	213.679	0.736922	0.810863	0.10795	0.38841	no
chr10_104180965_104181466	chr10_104180965_104181466	-	chr10:104180314-104181466	Barretts	OAC	OK	86.132	146.437	0.765664	0.672905	0.1948	0.504149	no
chr10_104181474_104181975	chr10_104181474_104181975	-	chr10:104181473-104181975	Barretts	OAC	OK	70.7813	56.4868	-0.325454	-0.368895	0.4584	0.733533	no
chr10_104182337_104182838	chr10_104182337_104182838	-	chr10:104182336-104182838	Barretts	OAC	OK	87.6286	197.324	1.17109	1.6217	0.002	0.0667088	no
chr10_104192235_104192736	chr10_104192235_104192736	-	chr10:104192234-104192736	Barretts	OAC	OK	142.502	201.894	0.502614	0.740165	0.1313	0.42229	no
chr10_104201809_104202310	chr10_104201809_104202310	-	chr10:104201808-104202310	Barretts	OAC	NOTEST	10.1995	11.1754	0.131829	0	1	1	no
chr10_104209261_104209762	chr10_104209261_104209762	-	chr10:104209260-104209762	Barretts	OAC	OK	83.7919	134.025	0.677618	0.886284	0.0729	0.322721	no
chr10_104210002_104210503	chr10_104210002_104210503	-	chr10:104210001-104210503	Barretts	OAC	OK	115.13	214.082	0.894895	1.29146	0.0103	0.136791	no
chr10_104211029_104211530	chr10_104211029_104211530	-	chr10:104211028-104211530	Barretts	OAC	OK	65.4849	96.6357	0.561393	0.677952	0.18145	0.487503	no
chr10_104220854_104221355	chr10_104220854_104221355	-	chr10:104220853-104221355	Barretts	OAC	OK	111.854	145.189	0.376318	0.515694	0.30395	0.615644	no
chr10_104238639_104239140	chr10_104238639_104239140	-	chr10:104238638-104239337	Barretts	OAC	OK	48.5023	96.1454	0.987165	0.907632	0.0897	0.356283	no
chr10_104238836_104239337	chr10_104238836_104239337	-	chr10:104238638-104239337	Barretts	OAC	OK	34.4273	34.9577	0.0220586	0.0127712	0.98335	0.988799	no
chr10_104252810_104253311	chr10_104252810_104253311	-	chr10:104252809-104253311	Barretts	OAC	OK	23.4416	16.3782	-0.517294	-0.482649	0.32565	0.634287	no
chr10_104261689_104262190	chr10_104261689_104262190	-	chr10:104261688-104262873	Barretts	OAC	OK	336.518	682.697	1.02056	1.41727	0.0046	0.0988773	no
chr10_104262010_104262511	chr10_104262010_104262511	-	chr10:104261688-104262873	Barretts	OAC	OK	73.7727	126.877	0.782266	0.452764	0.3947	0.688279	no
chr10_104262372_104262873	chr10_104262372_104262873	-	chr10:104261688-104262873	Barretts	OAC	OK	307.03	558.073	0.862076	1.11121	0.0283	0.212522	no
chr10_104263387_104263888	chr10_104263387_104263888	-	chr10:104263386-104263888	Barretts	OAC	OK	232.603	533.476	1.19755	2.07912	0.0001	0.0118442	yes
chr10_104299760_104300261	chr10_104299760_104300261	-	chr10:104299759-104300261	Barretts	OAC	OK	33.4615	19.4276	-0.784392	-0.768258	0.1308	0.421421	no
chr10_104306347_104306848	chr10_104306347_104306848	-	chr10:104306346-104306848	Barretts	OAC	OK	31.7035	12.3441	-1.36083	-1.27	0.0164	0.166983	no
chr10_104343525_104344026	chr10_104343525_104344026	-	chr10:104343524-104344026	Barretts	OAC	OK	60.391	51.0857	-0.241415	-0.283975	0.55995	0.797586	no
chr10_104352968_104353469	chr10_104352968_104353469	-	chr10:104352967-104353469	Barretts	OAC	OK	21.731	20.0734	-0.114472	-0.111181	0.81605	0.925378	no
chr10_104356146_104356647	chr10_104356146_104356647	-	chr10:104356145-104356647	Barretts	OAC	OK	65.6089	56.1855	-0.223694	-0.259466	0.59935	0.817748	no
chr10_104359349_104359850	chr10_104359349_104359850	-	chr10:104359348-104359951	Barretts	OAC	OK	43.3559	33.8107	-0.35875	-0.285363	0.5817	0.808179	no
chr10_104359450_104359951	chr10_104359450_104359951	-	chr10:104359348-104359951	Barretts	OAC	OK	14.8935	12.5222	-0.250193	-0.0920385	0.83675	0.934367	no
chr10_104364128_104364629	chr10_104364128_104364629	-	chr10:104364127-104364629	Barretts	OAC	OK	27.1056	27.8634	0.0397795	0.0401158	0.93695	0.976782	no
chr10_104376117_104376618	chr10_104376117_104376618	-	chr10:104376116-104376618	Barretts	OAC	OK	22.0651	9.42942	-1.22652	-1.06847	0.04735	0.266498	no
chr10_104379994_104380495	chr10_104379994_104380495	-	chr10:104379993-104380495	Barretts	OAC	OK	39.7203	15.6187	-1.3466	-1.29013	0.0126	0.150156	no
chr10_104387494_104387995	chr10_104387494_104387995	-	chr10:104387493-104387995	Barretts	OAC	OK	33.9583	29.4217	-0.206884	-0.216229	0.6633	0.850797	no
chr10_104401751_104402252	chr10_104401751_104402252	-	chr10:104401750-104402508	Barretts	OAC	OK	196.199	353.822	0.850704	1.26619	0.0134	0.15324	no
chr10_104402007_104402508	chr10_104402007_104402508	-	chr10:104401750-104402508	Barretts	OAC	OK	45.63	95.1221	1.0598	0.700073	0.19615	0.505913	no
chr10_104404552_104405053	chr10_104404552_104405053	-	chr10:104404551-104405053	Barretts	OAC	OK	103.262	134.994	0.38658	0.521533	0.29535	0.60673	no
chr10_105025434_105025935	chr10_105025434_105025935	-	chr10:105025433-105025935	Barretts	OAC	OK	22.9963	16.3784	-0.489608	-0.459907	0.35965	0.662596	no
chr10_105041482_105041983	chr10_105041482_105041983	-	chr10:105041481-105041983	Barretts	OAC	OK	17.5288	7.32283	-1.25926	-0.998139	0.06145	0.298898	no
chr10_105110162_105110663	chr10_105110162_105110663	-	chr10:105110161-105111167	Barretts	OAC	OK	21.6992	22.534	0.0544569	0.028254	0.95335	0.982351	no
chr10_105110409_105110910	chr10_105110409_105110910	-	chr10:105110161-105111167	Barretts	OAC	OK	21.5758	18.7927	-0.199241	-0.103743	0.8501	0.939628	no
chr10_105110666_105111167	chr10_105110666_105111167	-	chr10:105110161-105111167	Barretts	OAC	OK	52.5243	54.8113	0.0614874	0.0546753	0.9127	0.965785	no
chr10_105127471_105127972	chr10_105127471_105127972	-	chr10:105127470-105128715	Barretts	OAC	OK	93.3226	120.052	0.363362	0.313612	0.52345	0.775444	no
chr10_105127876_105128377	chr10_105127876_105128377	-	chr10:105127470-105128715	Barretts	OAC	OK	34.9208	51.003	0.546496	0.285924	0.5971	0.816438	no
chr10_105128214_105128715	chr10_105128214_105128715	-	chr10:105127470-105128715	Barretts	OAC	OK	131.735	190.734	0.533918	0.635254	0.21135	0.523804	no
chr10_105156101_105156602	chr10_105156101_105156602	-	chr10:105156100-105156602	Barretts	OAC	OK	221.59	383.149	0.790014	1.32343	0.0092	0.131566	no
chr10_105176490_105176991	chr10_105176490_105176991	-	chr10:105176489-105176991	Barretts	OAC	OK	22.3637	20.6842	-0.112627	-0.11038	0.82405	0.92885	no
chr10_105210727_105211228	chr10_105210727_105211228	-	chr10:105210726-105211228	Barretts	OAC	OK	64.5324	52.368	-0.301338	-0.348927	0.48825	0.753893	no
chr10_105211936_105212437	chr10_105211936_105212437	-	chr10:105211935-105212437	Barretts	OAC	OK	72.5124	45.2348	-0.680796	-0.782786	0.1229	0.409651	no
chr10_105218511_105219012	chr10_105218511_105219012	-	chr10:105218510-105219012	Barretts	OAC	OK	42.4089	17.8747	-1.24645	-1.26294	0.0145	0.157886	no
chr10_105230729_105231230	chr10_105230729_105231230	-	chr10:105230728-105231438	Barretts	OAC	OK	35.6086	20.4789	-0.79809	-0.553885	0.30035	0.611518	no
chr10_105230937_105231438	chr10_105230937_105231438	-	chr10:105230728-105231438	Barretts	OAC	OK	57.537	36.4554	-0.658358	-0.609592	0.2223	0.534669	no
chr10_105236161_105236662	chr10_105236161_105236662	-	chr10:105236160-105236662	Barretts	OAC	OK	34.1706	23.2313	-0.556686	-0.569346	0.2597	0.572794	no
chr10_105238803_105239304	chr10_105238803_105239304	-	chr10:105238802-105239304	Barretts	OAC	OK	63.2779	54.6497	-0.211488	-0.242927	0.6312	0.835061	no
chr10_105241622_105242123	chr10_105241622_105242123	-	chr10:105241621-105242123	Barretts	OAC	OK	32.7967	30.2975	-0.114356	-0.121884	0.81005	0.922569	no
chr10_105245418_105245919	chr10_105245418_105245919	-	chr10:105245417-105245919	Barretts	OAC	OK	46.2873	31.2175	-0.568263	-0.614596	0.22535	0.537696	no
chr10_105254017_105254518	chr10_105254017_105254518	-	chr10:105254016-105254518	Barretts	OAC	OK	39.2645	20.819	-0.915324	-0.96283	0.0581	0.291563	no
chr10_105267277_105267778	chr10_105267277_105267778	-	chr10:105267276-105267778	Barretts	OAC	OK	30.3251	17.889	-0.761438	-0.751131	0.1389	0.431547	no
chr10_105272325_105272826	chr10_105272325_105272826	-	chr10:105272324-105272826	Barretts	OAC	OK	55.6658	45.0925	-0.303902	-0.325738	0.52205	0.774234	no
chr10_105305423_105305924	chr10_105305423_105305924	-	chr10:105305422-105305924	Barretts	OAC	OK	50.3689	30.2121	-0.737409	-0.800061	0.10555	0.384101	no
chr10_105308800_105309301	chr10_105308800_105309301	-	chr10:105308799-105309301	Barretts	OAC	OK	34.7074	26.0726	-0.412706	-0.416784	0.4034	0.69532	no
chr10_105314602_105315103	chr10_105314602_105315103	-	chr10:105314601-105315103	Barretts	OAC	OK	42.2082	29.1468	-0.534184	-0.574873	0.2482	0.561368	no
chr10_105317179_105317680	chr10_105317179_105317680	-	chr10:105317178-105317680	Barretts	OAC	OK	54.6133	31.0754	-0.813481	-0.862839	0.0807	0.34021	no
chr10_105324826_105325327	chr10_105324826_105325327	-	chr10:105324825-105325327	Barretts	OAC	OK	31.5127	15.8363	-0.9927	-0.935734	0.06915	0.315465	no
chr10_105330732_105331233	chr10_105330732_105331233	-	chr10:105330731-105331233	Barretts	OAC	OK	29.6878	23.4074	-0.342904	-0.341837	0.4719	0.742376	no
chr10_105338537_105339038	chr10_105338537_105339038	-	chr10:105338536-105339038	Barretts	OAC	OK	69.3578	66.3851	-0.0631988	-0.0708296	0.88845	0.954805	no
chr10_105348794_105349295	chr10_105348794_105349295	-	chr10:105348793-105349295	Barretts	OAC	OK	47.0773	16.759	-1.49009	-1.47776	0.00735	0.1205	no
chr10_105352436_105352937	chr10_105352436_105352937	-	chr10:105352435-105352937	Barretts	OAC	OK	57.9347	31.6967	-0.870092	-0.941363	0.06125	0.298426	no
chr10_105358517_105359018	chr10_105358517_105359018	-	chr10:105358516-105359018	Barretts	OAC	OK	50.6053	41.652	-0.280902	-0.305259	0.5301	0.780085	no
chr10_105405093_105405594	chr10_105405093_105405594	-	chr10:105405092-105405594	Barretts	OAC	OK	27.9337	11.6097	-1.26668	-1.13746	0.02975	0.216818	no
chr10_105411575_105412076	chr10_105411575_105412076	-	chr10:105411574-105412076	Barretts	OAC	OK	40.6101	14.6283	-1.47308	-1.41355	0.00955	0.132755	no
chr10_105412424_105412925	chr10_105412424_105412925	-	chr10:105412423-105412925	Barretts	OAC	OK	32.6374	21.1154	-0.628234	-0.615467	0.2286	0.541407	no
chr10_105413336_105413837	chr10_105413336_105413837	-	chr10:105413335-105414021	Barretts	OAC	OK	112.869	78.9741	-0.515198	-0.536321	0.274	0.586285	no
chr10_105413520_105414021	chr10_105413520_105414021	-	chr10:105413335-105414021	Barretts	OAC	OK	39.1765	29.0205	-0.432916	-0.235138	0.6597	0.849309	no
chr10_105417915_105418416	chr10_105417915_105418416	-	chr10:105417914-105418416	Barretts	OAC	OK	67.1975	78.2497	0.219678	0.261752	0.5946	0.814783	no
chr10_105419595_105420096	chr10_105419595_105420096	-	chr10:105419594-105420393	Barretts	OAC	OK	105.325	220.322	1.06476	1.33589	0.00895	0.130291	no
chr10_105419892_105420393	chr10_105419892_105420393	-	chr10:105419594-105420393	Barretts	OAC	OK	49.3166	59.3593	0.267401	0.178196	0.70525	0.87284	no
chr10_105423545_105424046	chr10_105423545_105424046	-	chr10:105423544-105424046	Barretts	OAC	OK	49.7404	29.5824	-0.749677	-0.778977	0.1101	0.392015	no
chr10_105428309_105428810	chr10_105428309_105428810	-	chr10:105428308-105428810	Barretts	OAC	OK	68.1113	77.6987	0.189996	0.225932	0.64585	0.841873	no
chr10_105437796_105438297	chr10_105437796_105438297	-	chr10:105437795-105438297	Barretts	OAC	OK	62.7675	54.7577	-0.196956	-0.220257	0.65475	0.847163	no
chr10_105445830_105446331	chr10_105445830_105446331	-	chr10:105445829-105446331	Barretts	OAC	OK	54.2915	55.2188	0.0244341	0.0285972	0.9471	0.980342	no
chr10_105448192_105448693	chr10_105448192_105448693	-	chr10:105448191-105448693	Barretts	OAC	OK	25.2799	33.1589	0.391408	0.40383	0.4198	0.707511	no
chr10_105452666_105453167	chr10_105452666_105453167	-	chr10:105452665-105453167	Barretts	OAC	OK	36.3423	28.8011	-0.335524	-0.32956	0.50025	0.761051	no
chr10_105455391_105455892	chr10_105455391_105455892	-	chr10:105455390-105455892	Barretts	OAC	OK	59.7793	98.4913	0.720352	0.864348	0.08975	0.356314	no
chr10_105456134_105456635	chr10_105456134_105456635	-	chr10:105456133-105456635	Barretts	OAC	OK	87.6674	108.857	0.312328	0.406573	0.41155	0.701022	no
chr10_105475940_105476441	chr10_105475940_105476441	-	chr10:105475939-105476441	Barretts	OAC	OK	72.4268	123.244	0.766919	0.969108	0.0528	0.280617	no
chr10_105478740_105479241	chr10_105478740_105479241	-	chr10:105478739-105479241	Barretts	OAC	OK	36.7166	31.4951	-0.221302	-0.226349	0.6582	0.848794	no
chr10_105495687_105496188	chr10_105495687_105496188	-	chr10:105495686-105496188	Barretts	OAC	OK	82.3724	64.3761	-0.355636	-0.373349	0.44825	0.72708	no
chr10_105496461_105496962	chr10_105496461_105496962	-	chr10:105496460-105496962	Barretts	OAC	OK	57.6476	87.541	0.6027	0.733454	0.1322	0.423424	no
chr10_105600023_105600524	chr10_105600023_105600524	-	chr10:105600022-105600524	Barretts	OAC	OK	14.4653	26.2347	0.858879	0.780836	0.1184	0.403536	no
chr10_105602317_105602818	chr10_105602317_105602818	-	chr10:105602316-105602818	Barretts	OAC	OK	35.0354	39.3209	0.16648	0.179646	0.71095	0.875228	no
chr10_105605696_105606197	chr10_105605696_105606197	-	chr10:105605695-105606197	Barretts	OAC	OK	30.8439	18.0793	-0.770648	-0.726141	0.1473	0.442979	no
chr10_105613572_105614073	chr10_105613572_105614073	-	chr10:105613571-105614073	Barretts	OAC	OK	31.6827	32.9477	0.0564861	0.0587454	0.91175	0.965531	no
chr10_105615093_105615594	chr10_105615093_105615594	-	chr10:105615092-105615594	Barretts	OAC	OK	26.3243	43.5375	0.725862	0.767263	0.13145	0.422616	no
chr10_105618952_105619453	chr10_105618952_105619453	-	chr10:105618951-105619453	Barretts	OAC	OK	44.5313	49.5047	0.152746	0.170547	0.7299	0.885256	no
chr10_105631834_105632335	chr10_105631834_105632335	-	chr10:105631833-105632335	Barretts	OAC	OK	28.5342	18.5008	-0.625101	-0.58908	0.24	0.553206	no
chr10_105644352_105644853	chr10_105644352_105644853	-	chr10:105644351-105644853	Barretts	OAC	OK	37.8774	54	0.511623	0.575184	0.232	0.544901	no
chr10_105647697_105648198	chr10_105647697_105648198	-	chr10:105647696-105648485	Barretts	OAC	OK	27.784	58.8299	1.08229	0.671603	0.2082	0.520605	no
chr10_105647881_105648382	chr10_105647881_105648382	-	chr10:105647696-105648485	Barretts	OAC	OK	48.6845	91.5382	0.910911	0.732896	0.15	0.446894	no
chr10_105647984_105648485	chr10_105647984_105648485	-	chr10:105647696-105648485	Barretts	OAC	OK	21.2029	15.0824	-0.491399	-0.17847	0.7475	0.893377	no
chr10_105649858_105650359	chr10_105649858_105650359	-	chr10:105649857-105650497	Barretts	OAC	OK	168.522	280.731	0.73625	1.03708	0.04295	0.255746	no
chr10_105649996_105650497	chr10_105649996_105650497	-	chr10:105649857-105650497	Barretts	OAC	OK	36.3763	123.777	1.76667	1.08324	0.0505	0.274296	no
chr10_105667762_105668263	chr10_105667762_105668263	-	chr10:105667761-105668468	Barretts	OAC	OK	30.7577	52.0252	0.758263	0.46238	0.3838	0.679706	no
chr10_105667967_105668468	chr10_105667967_105668468	-	chr10:105667761-105668468	Barretts	OAC	OK	85.3623	203.792	1.25542	1.54267	0.00315	0.0827219	no
chr10_105677109_105677610	chr10_105677109_105677610	-	chr10:105677108-105678477	Barretts	OAC	OK	26.2791	55.1208	1.06868	0.438044	0.5688	0.801709	no
chr10_105677319_105677820	chr10_105677319_105677820	-	chr10:105677108-105678477	Barretts	OAC	OK	56.0834	80.7263	0.525464	0.264675	0.62065	0.829168	no
chr10_105677785_105678286	chr10_105677785_105678286	-	chr10:105677108-105678477	Barretts	OAC	OK	293.462	471.872	0.685223	0.862721	0.08485	0.348302	no
chr10_105677976_105678477	chr10_105677976_105678477	-	chr10:105677108-105678477	Barretts	OAC	OK	208.576	360.265	0.788486	0.85495	0.0931	0.361984	no
chr10_105681430_105681931	chr10_105681430_105681931	-	chr10:105681429-105681931	Barretts	OAC	OK	44.0775	74.4153	0.755559	0.872436	0.0829	0.344439	no
chr10_105689286_105689787	chr10_105689286_105689787	-	chr10:105689285-105689787	Barretts	OAC	OK	31.9232	24.2907	-0.394199	-0.381012	0.46175	0.735278	no
chr10_105695809_105696310	chr10_105695809_105696310	-	chr10:105695808-105696310	Barretts	OAC	OK	17.6158	10.0532	-0.809215	-0.667211	0.1633	0.464996	no
chr10_105726306_105726807	chr10_105726306_105726807	-	chr10:105726305-105727602	Barretts	OAC	OK	31.475	36.7602	0.22394	0.1136	0.816	0.925378	no
chr10_105726582_105727083	chr10_105726582_105727083	-	chr10:105726305-105727602	Barretts	OAC	OK	63.9439	102.034	0.674172	0.59775	0.24405	0.556536	no
chr10_105726875_105727376	chr10_105726875_105727376	-	chr10:105726305-105727602	Barretts	OAC	OK	32.1197	52.312	0.703685	0.428674	0.39315	0.686814	no
chr10_105727101_105727602	chr10_105727101_105727602	-	chr10:105726305-105727602	Barretts	OAC	OK	31.0566	26.793	-0.213044	-0.112628	0.83915	0.935201	no
chr10_105743120_105743621	chr10_105743120_105743621	-	chr10:105743119-105743621	Barretts	OAC	OK	27.9745	14.9297	-0.905928	-0.867747	0.0931	0.361984	no
chr10_105786488_105786989	chr10_105786488_105786989	-	chr10:105786487-105786989	Barretts	OAC	OK	13.4952	21.0747	0.643062	0.533235	0.2851	0.596871	no
chr10_105787836_105788337	chr10_105787836_105788337	-	chr10:105787835-105788337	Barretts	OAC	OK	30.0706	19.125	-0.652895	-0.653724	0.18765	0.494409	no
chr10_105805147_105805648	chr10_105805147_105805648	-	chr10:105805146-105805648	Barretts	OAC	OK	33.5459	39.8255	0.247558	0.269264	0.57845	0.806809	no
chr10_105812200_105812701	chr10_105812200_105812701	-	chr10:105812199-105812701	Barretts	OAC	OK	76.9477	177.29	1.20416	1.58307	0.0018	0.0635052	no
chr10_105818991_105819492	chr10_105818991_105819492	-	chr10:105818990-105819492	Barretts	OAC	OK	13.83	5.62993	-1.29661	-0.833019	0.10125	0.376721	no
chr10_105829241_105829742	chr10_105829241_105829742	-	chr10:105829240-105829742	Barretts	OAC	OK	30.8386	34.9327	0.179839	0.169223	0.73055	0.885643	no
chr10_105830779_105831280	chr10_105830779_105831280	-	chr10:105830778-105831280	Barretts	OAC	OK	21.1339	8.96179	-1.2377	-1.06697	0.0521	0.278683	no
chr10_105836448_105836949	chr10_105836448_105836949	-	chr10:105836447-105836949	Barretts	OAC	OK	21.4961	19.7045	-0.125549	-0.122204	0.80225	0.919339	no
chr10_105837008_105837509	chr10_105837008_105837509	-	chr10:105837007-105837509	Barretts	OAC	OK	25.1339	21.7033	-0.211724	-0.203373	0.67425	0.856763	no
chr10_105845700_105846201	chr10_105845700_105846201	-	chr10:105845699-105846201	Barretts	OAC	OK	25.468	19.2947	-0.400478	-0.397597	0.4241	0.710973	no
chr10_105869467_105869968	chr10_105869467_105869968	-	chr10:105869466-105869968	Barretts	OAC	OK	51.251	35.2686	-0.539197	-0.555855	0.27685	0.588767	no
chr10_105877473_105877974	chr10_105877473_105877974	-	chr10:105877472-105877974	Barretts	OAC	OK	51.8721	71.6022	0.465043	0.544142	0.26855	0.581883	no
chr10_105880402_105880903	chr10_105880402_105880903	-	chr10:105880401-105881084	Barretts	OAC	OK	89.734	79.8634	-0.16812	-0.158529	0.75325	0.895669	no
chr10_105880583_105881084	chr10_105880583_105881084	-	chr10:105880401-105881084	Barretts	OAC	OK	47.4752	122.447	1.36691	1.13386	0.0569	0.289294	no
chr10_105881473_105881974	chr10_105881473_105881974	-	chr10:105881472-105881974	Barretts	OAC	OK	389.085	721.412	0.890737	1.68582	0.0007	0.0383261	yes
chr10_105930596_105931097	chr10_105930596_105931097	-	chr10:105930595-105931097	Barretts	OAC	NOTEST	10.4712	6.95342	-0.590634	0	1	1	no
chr10_105959253_105959754	chr10_105959253_105959754	-	chr10:105959252-105959754	Barretts	OAC	OK	21.5021	12.8396	-0.743878	-0.636081	0.19895	0.509693	no
chr10_105969329_105969830	chr10_105969329_105969830	-	chr10:105969328-105969830	Barretts	OAC	OK	17.4243	8.6917	-1.00339	-0.807062	0.0936	0.362875	no
chr10_105980226_105980727	chr10_105980226_105980727	-	chr10:105980225-105980727	Barretts	OAC	OK	22.5926	23.1324	0.0340612	0.0321635	0.9633	0.985372	no
chr10_105991433_105991934	chr10_105991433_105991934	-	chr10:105991432-105992427	Barretts	OAC	OK	23.0301	35.114	0.608523	0.240108	0.66365	0.850904	no
chr10_105991624_105992125	chr10_105991624_105992125	-	chr10:105991432-105992427	Barretts	OAC	OK	32.2711	61.6862	0.934705	0.432186	0.43695	0.719986	no
chr10_105991926_105992427	chr10_105991926_105992427	-	chr10:105991432-105992427	Barretts	OAC	OK	257.685	451.516	0.809167	1.29273	0.01165	0.145092	no
chr10_106002734_106003235	chr10_106002734_106003235	-	chr10:106002733-106003235	Barretts	OAC	OK	22.288	14.1329	-0.657212	-0.587905	0.23255	0.545501	no
chr10_106014342_106014843	chr10_106014342_106014843	-	chr10:106014341-106015249	Barretts	OAC	OK	74.0422	76.6169	0.0493149	0.0545295	0.91485	0.966996	no
chr10_106014748_106015249	chr10_106014748_106015249	-	chr10:106014341-106015249	Barretts	OAC	OK	23.0478	29.1834	0.340523	0.193474	0.72055	0.8802	no
chr10_106028586_106029087	chr10_106028586_106029087	-	chr10:106028585-106029087	Barretts	OAC	OK	375.321	647.722	0.787249	1.43512	0.00465	0.0992779	no
chr10_106034400_106034901	chr10_106034400_106034901	-	chr10:106034399-106035298	Barretts	OAC	OK	57.0939	60.2458	0.0775245	0.0628473	0.89695	0.958438	no
chr10_106034643_106035144	chr10_106034643_106035144	-	chr10:106034399-106035298	Barretts	OAC	OK	48.0476	75.4863	0.651751	0.470384	0.34405	0.650055	no
chr10_106034797_106035298	chr10_106034797_106035298	-	chr10:106034399-106035298	Barretts	OAC	OK	32.2281	7.69503	-2.06632	-0.802348	0.2361	0.548135	no
chr10_106051102_106051603	chr10_106051102_106051603	-	chr10:106051101-106051603	Barretts	OAC	OK	145.151	156.045	0.104407	0.149702	0.76115	0.899558	no
chr10_106060469_106060970	chr10_106060469_106060970	-	chr10:106060468-106060970	Barretts	OAC	OK	37.5038	23.8651	-0.652135	-0.669882	0.18255	0.488965	no
chr10_106065293_106065794	chr10_106065293_106065794	-	chr10:106065292-106066038	Barretts	OAC	OK	68.8711	71.5423	0.0548975	0.0602175	0.89985	0.95996	no
chr10_106065537_106066038	chr10_106065537_106066038	-	chr10:106065292-106066038	Barretts	OAC	OK	14.5679	20.8441	0.516846	0.256357	0.66875	0.853418	no
chr10_106088545_106089046	chr10_106088545_106089046	-	chr10:106088544-106089299	Barretts	OAC	OK	27.4999	15.0823	-0.86657	-0.544002	0.27225	0.585167	no
chr10_106088798_106089299	chr10_106088798_106089299	-	chr10:106088544-106089299	Barretts	OAC	OK	40.6254	21.5045	-0.917744	-0.739686	0.16525	0.467176	no
chr10_106091218_106091719	chr10_106091218_106091719	-	chr10:106091217-106091719	Barretts	OAC	OK	73.3901	81.7196	0.155097	0.183978	0.6969	0.868245	no
chr10_1082187_1082688	chr10_1082187_1082688	-	chr10:1082186-1082688	Barretts	OAC	OK	62.2605	39.1363	-0.669811	-0.73874	0.1463	0.441346	no
chr10_1094721_1095222	chr10_1094721_1095222	-	chr10:1094720-1095537	Barretts	OAC	OK	285.29	489.185	0.77795	1.05864	0.03505	0.233725	no
chr10_1095036_1095537	chr10_1095036_1095537	-	chr10:1094720-1095537	Barretts	OAC	OK	343.74	505.53	0.556479	0.803126	0.10595	0.384833	no
chr10_1102096_1102597	chr10_1102096_1102597	-	chr10:1102095-1103427	Barretts	OAC	OK	50.8504	80.6139	0.66477	0.470388	0.3331	0.640451	no
chr10_1102535_1103036	chr10_1102535_1103036	-	chr10:1102095-1103427	Barretts	OAC	OK	107.849	121.376	0.170469	0.177009	0.71305	0.876543	no
chr10_1102772_1103273	chr10_1102772_1103273	-	chr10:1102095-1103427	Barretts	OAC	OK	9.41744	53.5311	2.50697	1.03397	0.24915	0.562494	no
chr10_1102926_1103427	chr10_1102926_1103427	-	chr10:1102095-1103427	Barretts	OAC	OK	20.7495	31.8087	0.616345	0.29349	0.61725	0.827356	no
chr10_1109418_1109919	chr10_1109418_1109919	-	chr10:1109417-1109919	Barretts	OAC	OK	20.6332	19.3785	-0.0905081	-0.0764733	0.8706	0.947406	no
chr10_1120265_1120766	chr10_1120265_1120766	-	chr10:1120264-1120766	Barretts	OAC	OK	17.1271	21.6967	0.341192	0.305917	0.53645	0.783996	no
chr10_112029283_112029784	chr10_112029283_112029784	-	chr10:112029282-112029784	Barretts	OAC	OK	35.144	29.9927	-0.228665	-0.226507	0.63585	0.837585	no
chr10_112039081_112039582	chr10_112039081_112039582	-	chr10:112039080-112039582	Barretts	OAC	OK	30.481	27.2548	-0.161402	-0.165934	0.7225	0.881068	no
chr10_112064048_112064549	chr10_112064048_112064549	-	chr10:112064047-112065071	Barretts	OAC	OK	34.2486	44.6023	0.381074	0.188838	0.71815	0.878687	no
chr10_112064232_112064733	chr10_112064232_112064733	-	chr10:112064047-112065071	Barretts	OAC	OK	22.8438	72.891	1.67393	0.817284	0.15035	0.447516	no
chr10_112064570_112065071	chr10_112064570_112065071	-	chr10:112064047-112065071	Barretts	OAC	OK	162.383	324.652	0.999496	1.41337	0.0054	0.104991	no
chr10_112065800_112066301	chr10_112065800_112066301	-	chr10:112065799-112066301	Barretts	OAC	OK	51.6711	80.702	0.643246	0.755171	0.1348	0.426147	no
chr10_112071056_112071557	chr10_112071056_112071557	-	chr10:112071055-112071557	Barretts	OAC	OK	32.9454	28.1909	-0.224848	-0.236928	0.6413	0.839998	no
chr10_112087260_112087761	chr10_112087260_112087761	-	chr10:112087259-112087761	Barretts	OAC	OK	31.338	25.6792	-0.287312	-0.294106	0.55585	0.795259	no
chr10_112113076_112113577	chr10_112113076_112113577	-	chr10:112113075-112113577	Barretts	OAC	OK	33.9181	31.7095	-0.0971372	-0.0981048	0.841	0.935962	no
chr10_112116204_112116705	chr10_112116204_112116705	-	chr10:112116203-112116705	Barretts	OAC	OK	91.3977	105.563	0.207879	0.270158	0.58755	0.811666	no
chr10_112123552_112124053	chr10_112123552_112124053	-	chr10:112123551-112124053	Barretts	OAC	OK	39.8322	13.2451	-1.58848	-1.49119	0.00465	0.0992779	no
chr10_112136055_112136556	chr10_112136055_112136556	-	chr10:112136054-112136556	Barretts	OAC	OK	24.7136	34.0646	0.462968	0.443046	0.3838	0.679706	no
chr10_112155290_112155791	chr10_112155290_112155791	-	chr10:112155289-112156141	Barretts	OAC	OK	43.9448	73.4548	0.741164	0.464448	0.3782	0.675853	no
chr10_112155468_112155969	chr10_112155468_112155969	-	chr10:112155289-112156141	Barretts	OAC	OK	93.1941	212.652	1.19019	1.23318	0.01865	0.177005	no
chr10_112155640_112156141	chr10_112155640_112156141	-	chr10:112155289-112156141	Barretts	OAC	OK	75.1621	115.738	0.622783	0.57477	0.26525	0.578622	no
chr10_112158370_112158871	chr10_112158370_112158871	-	chr10:112158369-112158871	Barretts	OAC	OK	121.464	266.499	1.13361	1.66735	0.0013	0.0536994	no
chr10_112159043_112159544	chr10_112159043_112159544	-	chr10:112159042-112159544	Barretts	OAC	OK	39.5886	85.9185	1.11788	1.26921	0.01495	0.160527	no
chr10_112167787_112168288	chr10_112167787_112168288	-	chr10:112167786-112168477	Barretts	OAC	OK	21.3493	34.9842	0.71251	0.511947	0.34845	0.65344	no
chr10_112167976_112168477	chr10_112167976_112168477	-	chr10:112167786-112168477	Barretts	OAC	OK	30.8447	36.4102	0.23932	0.18711	0.70335	0.872069	no
chr10_112170018_112170519	chr10_112170018_112170519	-	chr10:112170017-112170674	Barretts	OAC	OK	50.7563	63.975	0.333922	0.291888	0.5689	0.801709	no
chr10_112170173_112170674	chr10_112170173_112170674	-	chr10:112170017-112170674	Barretts	OAC	OK	45.8734	97.8022	1.09221	1.02251	0.05205	0.278587	no
chr10_112174174_112174675	chr10_112174174_112174675	-	chr10:112174173-112174813	Barretts	OAC	OK	33.4951	22.3438	-0.584073	-0.317054	0.5657	0.799984	no
chr10_112174312_112174813	chr10_112174312_112174813	-	chr10:112174173-112174813	Barretts	OAC	OK	51.1201	90.851	0.829612	0.794896	0.11005	0.391997	no
chr10_112177108_112177609	chr10_112177108_112177609	-	chr10:112177107-112177609	Barretts	OAC	OK	69.2896	65.3272	-0.084956	-0.1003	0.84155	0.936185	no
chr10_112193461_112193962	chr10_112193461_112193962	-	chr10:112193460-112193962	Barretts	OAC	OK	30.7375	14.1915	-1.11497	-1.04083	0.04005	0.248242	no
chr10_112206769_112207270	chr10_112206769_112207270	-	chr10:112206768-112207270	Barretts	OAC	OK	19.8618	17.3565	-0.194521	-0.178843	0.71315	0.876572	no
chr10_112220116_112220617	chr10_112220116_112220617	-	chr10:112220115-112220617	Barretts	OAC	OK	44.7227	21.2924	-1.07067	-1.11094	0.03355	0.229119	no
chr10_112247240_112247741	chr10_112247240_112247741	-	chr10:112247239-112247741	Barretts	OAC	OK	32.4968	20.0141	-0.699283	-0.68309	0.1834	0.489697	no
chr10_112256985_112257486	chr10_112256985_112257486	-	chr10:112256984-112257810	Barretts	OAC	OK	36.7913	38.2871	0.0574966	0.0324046	0.9521	0.981776	no
chr10_112257309_112257810	chr10_112257309_112257810	-	chr10:112256984-112257810	Barretts	OAC	OK	150.419	178.695	0.248514	0.334897	0.50465	0.763244	no
chr10_112257867_112258368	chr10_112257867_112258368	-	chr10:112257866-112258368	Barretts	OAC	OK	48.1738	29.3738	-0.713719	-0.769975	0.12775	0.416449	no
chr10_112260900_112261401	chr10_112260900_112261401	-	chr10:112260899-112261401	Barretts	OAC	OK	67.476	79.1052	0.229399	0.279146	0.56535	0.799814	no
chr10_112264094_112264595	chr10_112264094_112264595	-	chr10:112264093-112264595	Barretts	OAC	OK	34.0346	40.6732	0.257076	0.270173	0.5891	0.812421	no
chr10_112268877_112269378	chr10_112268877_112269378	-	chr10:112268876-112269378	Barretts	OAC	OK	17.5382	16.1307	-0.120686	-0.101393	0.8327	0.932622	no
chr10_112282005_112282506	chr10_112282005_112282506	-	chr10:112282004-112282799	Barretts	OAC	OK	20.0226	22.4167	0.162946	0.0801438	0.8732	0.948107	no
chr10_112282298_112282799	chr10_112282298_112282799	-	chr10:112282004-112282799	Barretts	OAC	OK	93.7566	80.0375	-0.228244	-0.261382	0.59985	0.818174	no
chr10_112285132_112285633	chr10_112285132_112285633	-	chr10:112285131-112286074	Barretts	OAC	OK	21.7713	10.3495	-1.07286	-0.584436	0.2753	0.587444	no
chr10_112285343_112285844	chr10_112285343_112285844	-	chr10:112285131-112286074	Barretts	OAC	NOTEST	6.59547	4.76357	-0.469431	0	1	1	no
chr10_112285573_112286074	chr10_112285573_112286074	-	chr10:112285131-112286074	Barretts	OAC	OK	28.3924	19.5546	-0.537998	-0.407032	0.4365	0.719654	no
chr10_112287408_112287909	chr10_112287408_112287909	-	chr10:112287407-112287909	Barretts	OAC	OK	30.8151	26.157	-0.236438	-0.22884	0.65365	0.846589	no
chr10_112289984_112290485	chr10_112289984_112290485	-	chr10:112289983-112290485	Barretts	OAC	OK	44.789	35.154	-0.349457	-0.372264	0.45545	0.731447	no
chr10_112295583_112296084	chr10_112295583_112296084	-	chr10:112295582-112296084	Barretts	OAC	OK	31.6312	20.838	-0.602129	-0.602254	0.22035	0.53211	no
chr10_112316021_112316522	chr10_112316021_112316522	-	chr10:112316020-112316522	Barretts	OAC	OK	13.5374	11.1322	-0.282207	-0.223829	0.6431	0.840396	no
chr10_112326903_112327404	chr10_112326903_112327404	-	chr10:112326902-112328326	Barretts	OAC	OK	142.677	185.659	0.379897	0.41932	0.40665	0.697796	no
chr10_112327184_112327685	chr10_112327184_112327685	-	chr10:112326902-112328326	Barretts	OAC	OK	83.7201	111.586	0.414505	0.353453	0.4728	0.7433	no
chr10_112327428_112327929	chr10_112327428_112327929	-	chr10:112326902-112328326	Barretts	OAC	OK	68.1903	69.0537	0.0181519	0.0127661	0.98	0.987851	no
chr10_112327651_112328152	chr10_112327651_112328152	-	chr10:112326902-112328326	Barretts	OAC	OK	25.4254	43.3927	0.771179	0.298571	0.63915	0.839234	no
chr10_112327825_112328326	chr10_112327825_112328326	-	chr10:112326902-112328326	Barretts	OAC	OK	34.8167	37.3813	0.102534	0.0485094	0.9306	0.973886	no
chr10_112369358_112369859	chr10_112369358_112369859	-	chr10:112369357-112369859	Barretts	OAC	OK	22.8471	9.43104	-1.27652	-1.10155	0.0413	0.251073	no
chr10_112369963_112370464	chr10_112369963_112370464	-	chr10:112369962-112370464	Barretts	OAC	OK	41.7355	24.3064	-0.779938	-0.807208	0.11285	0.395673	no
chr10_112379884_112380385	chr10_112379884_112380385	-	chr10:112379883-112380385	Barretts	OAC	OK	19.3002	12.912	-0.579897	-0.511749	0.3141	0.624149	no
chr10_112385168_112385669	chr10_112385168_112385669	-	chr10:112385167-112385669	Barretts	OAC	OK	36.2726	25.1824	-0.526467	-0.539483	0.282	0.593557	no
chr10_112385686_112386187	chr10_112385686_112386187	-	chr10:112385685-112386187	Barretts	OAC	OK	36.27	9.58039	-1.92062	-1.61915	0.00345	0.0863666	no
chr10_112389465_112389966	chr10_112389465_112389966	-	chr10:112389464-112389966	Barretts	OAC	OK	46.6433	27.7316	-0.750139	-0.725517	0.12605	0.413969	no
chr10_112394443_112394944	chr10_112394443_112394944	-	chr10:112394442-112394944	Barretts	OAC	OK	17.9519	14.9239	-0.266513	-0.225225	0.6509	0.844787	no
chr10_112397304_112397805	chr10_112397304_112397805	-	chr10:112397303-112397805	Barretts	OAC	OK	22.5846	9.41042	-1.26301	-1.09286	0.0413	0.251073	no
chr10_112400956_112401457	chr10_112400956_112401457	-	chr10:112400955-112401457	Barretts	OAC	NOTEST	12.1817	10.4237	-0.224851	0	1	1	no
chr10_112403482_112403983	chr10_112403482_112403983	-	chr10:112403481-112404326	Barretts	OAC	OK	33.4236	19.2513	-0.795911	-0.608525	0.2416	0.554984	no
chr10_112403825_112404326	chr10_112403825_112404326	-	chr10:112403481-112404326	Barretts	OAC	OK	43.3198	11.1688	-1.95555	-1.33071	0.02085	0.185545	no
chr10_112411291_112411792	chr10_112411291_112411792	-	chr10:112411290-112411792	Barretts	OAC	OK	16.7542	11.1883	-0.582528	-0.522016	0.31605	0.626051	no
chr10_112417996_112418497	chr10_112417996_112418497	-	chr10:112417995-112418497	Barretts	OAC	OK	40.1241	18.2138	-1.13944	-1.13591	0.0267	0.206427	no
chr10_112424646_112425147	chr10_112424646_112425147	-	chr10:112424645-112425147	Barretts	OAC	OK	19.1362	40.039	1.0651	1.04597	0.0412	0.251073	no
chr10_112431742_112432243	chr10_112431742_112432243	-	chr10:112431741-112432493	Barretts	OAC	OK	69.5355	51.8738	-0.422743	-0.38777	0.45025	0.728391	no
chr10_112431992_112432493	chr10_112431992_112432493	-	chr10:112431741-112432493	Barretts	OAC	OK	55.0423	31.3614	-0.811552	-0.553185	0.25735	0.569994	no
chr10_112439341_112439842	chr10_112439341_112439842	-	chr10:112439340-112439842	Barretts	OAC	OK	23.0827	7.84099	-1.5577	-1.1987	0.0241	0.196905	no
chr10_112440715_112441216	chr10_112440715_112441216	-	chr10:112440714-112441216	Barretts	OAC	OK	31.8253	14.7749	-1.10702	-1.08039	0.03505	0.233725	no
chr10_1124468_1124969	chr10_1124468_1124969	-	chr10:1124467-1125081	Barretts	OAC	OK	14.8186	36.2074	1.28888	0.864155	0.1085	0.389383	no
chr10_1124580_1125081	chr10_1124580_1125081	-	chr10:1124467-1125081	Barretts	OAC	OK	20.966	7.23509	-1.53497	-0.545127	0.18745	0.494274	no
chr10_112485687_112486188	chr10_112485687_112486188	-	chr10:112485686-112486188	Barretts	OAC	OK	32.7908	11.602	-1.49892	-1.34491	0.0128	0.150734	no
chr10_112493247_112493748	chr10_112493247_112493748	-	chr10:112493246-112493748	Barretts	OAC	OK	25.1332	23.9482	-0.0696796	-0.0658938	0.89555	0.957891	no
chr10_112499398_112499899	chr10_112499398_112499899	-	chr10:112499397-112499899	Barretts	OAC	OK	30.4797	24.2275	-0.331205	-0.332122	0.50375	0.762877	no
chr10_112506042_112506543	chr10_112506042_112506543	-	chr10:112506041-112506543	Barretts	OAC	OK	42.0033	40.9441	-0.036847	-0.0396882	0.93405	0.975626	no
chr10_112518588_112519089	chr10_112518588_112519089	-	chr10:112518587-112519089	Barretts	OAC	OK	23.4081	12.8163	-0.869023	-0.804324	0.11995	0.405969	no
chr10_112524064_112524565	chr10_112524064_112524565	-	chr10:112524063-112524565	Barretts	OAC	OK	17.6506	23.4097	0.407389	0.376023	0.4601	0.734312	no
chr10_112534309_112534810	chr10_112534309_112534810	-	chr10:112534308-112535155	Barretts	OAC	OK	30.1055	23.7726	-0.340728	-0.212722	0.67115	0.854758	no
chr10_112534654_112535155	chr10_112534654_112535155	-	chr10:112534308-112535155	Barretts	OAC	OK	42.8522	70.409	0.71639	0.653189	0.2057	0.517624	no
chr10_112553524_112554025	chr10_112553524_112554025	-	chr10:112553523-112554025	Barretts	OAC	OK	12.9402	4.88835	-1.40444	-0.849799	0.09835	0.371488	no
chr10_112562342_112562843	chr10_112562342_112562843	-	chr10:112562341-112562843	Barretts	OAC	OK	40.0531	36.5749	-0.131062	-0.140424	0.77375	0.905573	no
chr10_112563526_112564027	chr10_112563526_112564027	-	chr10:112563525-112564027	Barretts	OAC	OK	45.7021	49.6639	0.119935	0.135701	0.7753	0.906169	no
chr10_112573708_112574209	chr10_112573708_112574209	-	chr10:112573707-112574209	Barretts	OAC	OK	19.4475	35.5808	0.871516	0.82362	0.0865	0.351225	no
chr10_112578543_112579044	chr10_112578543_112579044	-	chr10:112578542-112579044	Barretts	OAC	OK	54.2239	64.6657	0.254073	0.286148	0.56165	0.7983	no
chr10_112593673_112594174	chr10_112593673_112594174	-	chr10:112593672-112595084	Barretts	OAC	OK	77.7435	102.814	0.403243	0.364864	0.4561	0.732005	no
chr10_112593957_112594458	chr10_112593957_112594458	-	chr10:112593672-112595084	Barretts	OAC	OK	34.9827	30.0162	-0.220897	-0.119801	0.83215	0.9324	no
chr10_112594356_112594857	chr10_112594356_112594857	-	chr10:112593672-112595084	Barretts	OAC	OK	16.9088	40.3827	1.25596	0.52504	0.2939	0.605385	no
chr10_112594583_112595084	chr10_112594583_112595084	-	chr10:112593672-112595084	Barretts	OAC	OK	29.74	37.8432	0.347631	0.17393	0.7752	0.906083	no
chr10_112600027_112600528	chr10_112600027_112600528	-	chr10:112600026-112600528	Barretts	OAC	OK	79.7078	160.14	1.00654	1.30666	0.0096	0.132919	no
chr10_112605406_112605907	chr10_112605406_112605907	-	chr10:112605405-112605907	Barretts	OAC	OK	138.027	187.376	0.440981	0.622788	0.207	0.519282	no
chr10_112605969_112606470	chr10_112605969_112606470	-	chr10:112605968-112606470	Barretts	OAC	OK	84.0267	75.6442	-0.151619	-0.184781	0.70675	0.873144	no
chr10_112612017_112612518	chr10_112612017_112612518	-	chr10:112612016-112612518	Barretts	OAC	OK	46.9306	94.2688	1.00625	1.2021	0.01705	0.16973	no
chr10_112617282_112617783	chr10_112617282_112617783	-	chr10:112617281-112617783	Barretts	OAC	OK	88.8749	128.212	0.528685	0.691453	0.16225	0.463636	no
chr10_112617954_112618455	chr10_112617954_112618455	-	chr10:112617953-112618455	Barretts	OAC	OK	122.619	163.77	0.417493	0.571546	0.24405	0.556536	no
chr10_112624336_112624837	chr10_112624336_112624837	-	chr10:112624335-112624837	Barretts	OAC	OK	39.3756	47.4482	0.269052	0.296133	0.5486	0.790603	no
chr10_112625138_112625639	chr10_112625138_112625639	-	chr10:112625137-112625639	Barretts	OAC	OK	33.0277	42.1705	0.352561	0.383738	0.4392	0.721577	no
chr10_112631334_112631835	chr10_112631334_112631835	-	chr10:112631333-112632281	Barretts	OAC	OK	169.984	318.889	0.90766	1.31438	0.00945	0.132422	no
chr10_112631780_112632281	chr10_112631780_112632281	-	chr10:112631333-112632281	Barretts	OAC	OK	58.3994	59.8184	0.034637	0.0215904	0.9643	0.985816	no
chr10_112678156_112678657	chr10_112678156_112678657	-	chr10:112678155-112679746	Barretts	OAC	OK	227.09	356.44	0.650392	0.601462	0.2334	0.545906	no
chr10_112678423_112678924	chr10_112678423_112678924	-	chr10:112678155-112679746	Barretts	OAC	OK	92.3085	178.074	0.94794	0.519014	0.34355	0.649216	no
chr10_112678854_112679355	chr10_112678854_112679355	-	chr10:112678155-112679746	Barretts	OAC	OK	654.814	953.618	0.542325	0.841246	0.09695	0.369405	no
chr10_112679245_112679746	chr10_112679245_112679746	-	chr10:112678155-112679746	Barretts	OAC	OK	93.4734	161.932	0.79276	0.484101	0.34485	0.650884	no
chr10_112683843_112684344	chr10_112683843_112684344	-	chr10:112683842-112684344	Barretts	OAC	OK	41.4395	41.0744	-0.0127673	-0.013735	0.9758	0.987045	no
chr10_112835795_112836296	chr10_112835795_112836296	-	chr10:112835794-112837337	Barretts	OAC	OK	65.5183	58.8545	-0.154745	-0.10241	0.84085	0.935884	no
chr10_112836050_112836551	chr10_112836050_112836551	-	chr10:112835794-112837337	Barretts	OAC	OK	67.0899	42.3415	-0.664023	-0.357733	0.40605	0.697385	no
chr10_112836378_112836879	chr10_112836378_112836879	-	chr10:112835794-112837337	Barretts	OAC	OK	57.8952	78.0283	0.430555	0.297029	0.63705	0.838344	no
chr10_112836544_112837045	chr10_112836544_112837045	-	chr10:112835794-112837337	Barretts	OAC	OK	87.2972	63.373	-0.462067	-0.310757	0.4961	0.759149	no
chr10_112836836_112837337	chr10_112836836_112837337	-	chr10:112835794-112837337	Barretts	OAC	OK	32.6743	28.178	-0.213588	-0.0895987	0.87765	0.949691	no
chr10_112837440_112837941	chr10_112837440_112837941	-	chr10:112837439-112837941	Barretts	OAC	OK	52.4751	37.5143	-0.484191	-0.48895	0.32895	0.636974	no
chr10_112851576_112852077	chr10_112851576_112852077	-	chr10:112851575-112852077	Barretts	OAC	OK	17.3849	14.6715	-0.244813	-0.206434	0.68935	0.864033	no
chr10_112858748_112859249	chr10_112858748_112859249	-	chr10:112858747-112859249	Barretts	OAC	OK	61.2398	81.6063	0.414212	0.488595	0.31705	0.626792	no
chr10_112859910_112860411	chr10_112859910_112860411	-	chr10:112859909-112860411	Barretts	OAC	OK	47.4187	63.9837	0.432248	0.478467	0.3238	0.632586	no
chr10_112862810_112863311	chr10_112862810_112863311	-	chr10:112862809-112863311	Barretts	OAC	OK	61.1059	54.0931	-0.175867	-0.196067	0.68985	0.86441	no
chr10_112888460_112888961	chr10_112888460_112888961	-	chr10:112888459-112888961	Barretts	OAC	OK	89.8404	158.672	0.820615	1.07931	0.02785	0.210824	no
chr10_112890988_112891489	chr10_112890988_112891489	-	chr10:112890987-112891489	Barretts	OAC	OK	81.1346	65.7164	-0.304064	-0.364023	0.4649	0.737428	no
chr10_112905922_112906423	chr10_112905922_112906423	-	chr10:112905921-112906423	Barretts	OAC	OK	27.526	13.1004	-1.07118	-0.973975	0.058	0.29144	no
chr10_112944114_112944615	chr10_112944114_112944615	-	chr10:112944113-112944615	Barretts	OAC	OK	19.2278	25.4103	0.402218	0.363142	0.4719	0.742376	no
chr10_112967266_112967767	chr10_112967266_112967767	-	chr10:112967265-112967767	Barretts	OAC	OK	42.9425	16.7513	-1.35813	-1.36355	0.0118	0.145968	no
chr10_113009681_113010182	chr10_113009681_113010182	-	chr10:113009680-113010182	Barretts	OAC	OK	67.7397	29.934	-1.17821	-1.18607	0.02425	0.197344	no
chr10_113041209_113041710	chr10_113041209_113041710	-	chr10:113041208-113041710	Barretts	OAC	OK	42.7832	14.2311	-1.588	-1.51199	0.006	0.11008	no
chr10_113076354_113076855	chr10_113076354_113076855	-	chr10:113076353-113076855	Barretts	OAC	OK	20.7864	12.3973	-0.745611	-0.648628	0.2157	0.52791	no
chr10_1153534_1154035	chr10_1153534_1154035	-	chr10:1153533-1154035	Barretts	OAC	OK	48.1645	44.8133	-0.104043	-0.115214	0.8165	0.925583	no
chr10_1155961_1156462	chr10_1155961_1156462	-	chr10:1155960-1156462	Barretts	OAC	OK	60.3923	41.7218	-0.533565	-0.605368	0.2202	0.531895	no
chr10_115925143_115925644	chr10_115925143_115925644	-	chr10:115925142-115925644	Barretts	OAC	OK	10.3259	14.2897	0.468709	0.385262	0.44555	0.725635	no
chr10_115933507_115934008	chr10_115933507_115934008	-	chr10:115933506-115934882	Barretts	OAC	OK	50.4174	80.7022	0.678686	0.361729	0.48565	0.752326	no
chr10_115933846_115934347	chr10_115933846_115934347	-	chr10:115933506-115934882	Barretts	OAC	OK	375.663	587.322	0.644711	1.01987	0.041	0.250606	no
chr10_115934213_115934714	chr10_115934213_115934714	-	chr10:115933506-115934882	Barretts	OAC	OK	38.5761	83.5299	1.11459	0.504619	0.3719	0.670826	no
chr10_115934381_115934882	chr10_115934381_115934882	-	chr10:115933506-115934882	Barretts	OAC	OK	55.6315	71.8376	0.368836	0.196745	0.71625	0.877811	no
chr10_115938788_115939289	chr10_115938788_115939289	-	chr10:115938787-115939289	Barretts	OAC	OK	36.13	29.4027	-0.297251	-0.274868	0.5803	0.807739	no
chr10_115941604_115942105	chr10_115941604_115942105	-	chr10:115941603-115942274	Barretts	OAC	OK	16.0724	10.5963	-0.601028	-0.326893	0.53635	0.783996	no
chr10_115941773_115942274	chr10_115941773_115942274	-	chr10:115941603-115942274	Barretts	OAC	OK	13.5812	21.5855	0.668454	0.433614	0.39905	0.691364	no
chr10_115966707_115967208	chr10_115966707_115967208	-	chr10:115966706-115967208	Barretts	OAC	OK	27.5701	10.4209	-1.40362	-1.1797	0.0369	0.238348	no
chr10_115998784_115999285	chr10_115998784_115999285	-	chr10:115998783-115999773	Barretts	OAC	OK	24.1162	32.5766	0.433834	0.209836	0.6745	0.856893	no
chr10_115999053_115999554	chr10_115999053_115999554	-	chr10:115998783-115999773	Barretts	OAC	OK	40.7794	32.6468	-0.320902	-0.205437	0.7039	0.872316	no
chr10_115999272_115999773	chr10_115999272_115999773	-	chr10:115998783-115999773	Barretts	OAC	OK	56.3121	42.9126	-0.392043	-0.311721	0.55135	0.792566	no
chr10_116004899_116005400	chr10_116004899_116005400	-	chr10:116004898-116005701	Barretts	OAC	OK	34.4916	32.0706	-0.104995	-0.0833223	0.8624	0.944236	no
chr10_116005200_116005701	chr10_116005200_116005701	-	chr10:116004898-116005701	Barretts	OAC	OK	27.3735	29.0823	0.0873631	0.0629008	0.9	0.95996	no
chr10_116006617_116007118	chr10_116006617_116007118	-	chr10:116006616-116007118	Barretts	OAC	OK	41.1993	56.0655	0.444493	0.4992	0.32365	0.632408	no
chr10_116010069_116010570	chr10_116010069_116010570	-	chr10:116010068-116010570	Barretts	OAC	OK	38.0555	15.3615	-1.30879	-1.16589	0.0313	0.221981	no
chr10_116017958_116018459	chr10_116017958_116018459	-	chr10:116017957-116018459	Barretts	OAC	OK	32.2284	30.1814	-0.0946731	-0.0928866	0.85425	0.940866	no
chr10_116026194_116026695	chr10_116026194_116026695	-	chr10:116026193-116026695	Barretts	OAC	OK	74.8106	62.2225	-0.265806	-0.287446	0.56075	0.798072	no
chr10_116063644_116064145	chr10_116063644_116064145	-	chr10:116063643-116064145	Barretts	OAC	OK	69.4536	45.8102	-0.60038	-0.699159	0.15695	0.456432	no
chr10_116064214_116064715	chr10_116064214_116064715	-	chr10:116064213-116064715	Barretts	OAC	OK	69.8139	51.442	-0.440568	-0.50914	0.2997	0.611088	no
chr10_116080380_116080881	chr10_116080380_116080881	-	chr10:116080379-116080881	Barretts	OAC	OK	70.0277	120.735	0.785841	0.978669	0.0452	0.260675	no
chr10_116097190_116097691	chr10_116097190_116097691	-	chr10:116097189-116097691	Barretts	OAC	OK	25.7633	10.156	-1.34298	-1.1291	0.02825	0.212375	no
chr10_116103166_116103667	chr10_116103166_116103667	-	chr10:116103165-116103923	Barretts	OAC	OK	25.095	12.3297	-1.02526	-0.484811	0.29695	0.608284	no
chr10_116103422_116103923	chr10_116103422_116103923	-	chr10:116103165-116103923	Barretts	OAC	OK	30.5086	31.3895	0.0410644	0.0313459	0.95075	0.981634	no
chr10_116127443_116127944	chr10_116127443_116127944	-	chr10:116127442-116127944	Barretts	OAC	OK	43.8859	27.3763	-0.680826	-0.705094	0.16925	0.472738	no
chr10_116131877_116132378	chr10_116131877_116132378	-	chr10:116131876-116132378	Barretts	OAC	OK	53.4774	43.2238	-0.307103	-0.324101	0.50125	0.761684	no
chr10_1161407_1161908	chr10_1161407_1161908	-	chr10:1161406-1161908	Barretts	OAC	OK	27.4108	19.852	-0.465459	-0.451261	0.37755	0.675316	no
chr10_116146172_116146673	chr10_116146172_116146673	-	chr10:116146171-116146673	Barretts	OAC	OK	22.8096	18.6275	-0.292209	-0.277427	0.56645	0.800265	no
chr10_116157338_116157839	chr10_116157338_116157839	-	chr10:116157337-116157839	Barretts	OAC	OK	53.0776	30.8859	-0.781157	-0.826049	0.09465	0.365197	no
chr10_116164006_116164507	chr10_116164006_116164507	-	chr10:116164005-116164507	Barretts	OAC	OK	96.4306	82.3749	-0.227286	-0.284744	0.56625	0.800265	no
chr10_116164739_116165240	chr10_116164739_116165240	-	chr10:116164738-116165240	Barretts	OAC	OK	70.3314	53.447	-0.39606	-0.46375	0.35045	0.655155	no
chr10_116167883_116168384	chr10_116167883_116168384	-	chr10:116167882-116168384	Barretts	OAC	OK	53.0709	14.6363	-1.85838	-1.73993	0.00205	0.0673444	no
chr10_116173133_116173634	chr10_116173133_116173634	-	chr10:116173132-116173634	Barretts	OAC	OK	53.7766	34.301	-0.648728	-0.659477	0.18715	0.494119	no
chr10_116201844_116202345	chr10_116201844_116202345	-	chr10:116201843-116202345	Barretts	OAC	OK	26.3893	20.3981	-0.37152	-0.329517	0.51055	0.767075	no
chr10_116218660_116219161	chr10_116218660_116219161	-	chr10:116218659-116219161	Barretts	OAC	OK	21.164	26.9955	0.351106	0.359941	0.47635	0.746309	no
chr10_116231033_116231534	chr10_116231033_116231534	-	chr10:116231032-116231534	Barretts	OAC	OK	76.7682	59.9021	-0.357901	-0.428973	0.3796	0.677	no
chr10_116239106_116239607	chr10_116239106_116239607	-	chr10:116239105-116239607	Barretts	OAC	OK	31.7931	26.0539	-0.287216	-0.271755	0.57395	0.804431	no
chr10_116249176_116249677	chr10_116249176_116249677	-	chr10:116249175-116249677	Barretts	OAC	OK	27.2602	11.9793	-1.18625	-1.06647	0.03485	0.233395	no
chr10_116259394_116259895	chr10_116259394_116259895	-	chr10:116259393-116259895	Barretts	OAC	OK	232.225	283.262	0.286612	0.466123	0.3474	0.652772	no
chr10_116267180_116267681	chr10_116267180_116267681	-	chr10:116267179-116267681	Barretts	OAC	OK	215.824	374.264	0.7942	1.31677	0.008	0.12481	no
chr10_116278226_116278727	chr10_116278226_116278727	-	chr10:116278225-116278727	Barretts	OAC	OK	84.4794	84.9763	0.00846078	0.0106069	0.98715	0.989359	no
chr10_116278961_116279462	chr10_116278961_116279462	-	chr10:116278960-116279462	Barretts	OAC	OK	107.365	164.718	0.617471	0.857672	0.08095	0.340604	no
chr10_116279608_116280109	chr10_116279608_116280109	-	chr10:116279607-116280109	Barretts	OAC	OK	102.72	133.472	0.377821	0.506757	0.3028	0.614351	no
chr10_116286158_116286659	chr10_116286158_116286659	-	chr10:116286157-116286903	Barretts	OAC	OK	46.4206	55.9452	0.269247	0.201842	0.68885	0.863717	no
chr10_116286402_116286903	chr10_116286402_116286903	-	chr10:116286157-116286903	Barretts	OAC	OK	87.7222	141.293	0.68768	0.801578	0.1111	0.393523	no
chr10_116298189_116298690	chr10_116298189_116298690	-	chr10:116298188-116298690	Barretts	OAC	OK	93.7842	114.05	0.282244	0.358598	0.46535	0.737772	no
chr10_116301077_116301578	chr10_116301077_116301578	-	chr10:116301076-116301578	Barretts	OAC	OK	101.262	125.691	0.311792	0.413454	0.38465	0.680174	no
chr10_116303949_116304450	chr10_116303949_116304450	-	chr10:116303948-116304450	Barretts	OAC	OK	54.4374	57.9508	0.0902298	0.0983107	0.84195	0.936271	no
chr10_116306797_116307298	chr10_116306797_116307298	-	chr10:116306796-116307645	Barretts	OAC	OK	131.683	108.3	-0.282034	-0.327893	0.5242	0.775993	no
chr10_116307144_116307645	chr10_116307144_116307645	-	chr10:116306796-116307645	Barretts	OAC	OK	54.4921	44.5957	-0.289144	-0.185748	0.6914	0.864983	no
chr10_116363676_116364177	chr10_116363676_116364177	-	chr10:116363675-116364177	Barretts	OAC	OK	39.8944	52.7798	0.4038	0.427357	0.3834	0.679359	no
chr10_116372934_116373435	chr10_116372934_116373435	-	chr10:116372933-116373785	Barretts	OAC	OK	66.5304	77.9239	0.228052	0.218239	0.6749	0.856998	no
chr10_116373284_116373785	chr10_116373284_116373785	-	chr10:116372933-116373785	Barretts	OAC	OK	54.277	47.0685	-0.205578	-0.149577	0.75395	0.896092	no
chr10_116375819_116376320	chr10_116375819_116376320	-	chr10:116375818-116376320	Barretts	OAC	OK	11.9253	12.5415	0.0726787	0.0585702	0.9285	0.973012	no
chr10_116383616_116384117	chr10_116383616_116384117	-	chr10:116383615-116384117	Barretts	OAC	OK	41.4154	52.3916	0.339166	0.365879	0.45135	0.728964	no
chr10_116391663_116392164	chr10_116391663_116392164	-	chr10:116391662-116392164	Barretts	OAC	OK	70.7905	53.8944	-0.39342	-0.448569	0.3628	0.664812	no
chr10_116392926_116393427	chr10_116392926_116393427	-	chr10:116392925-116393427	Barretts	OAC	OK	25.4587	34.6712	0.445579	0.461175	0.3442	0.650268	no
chr10_116395543_116396044	chr10_116395543_116396044	-	chr10:116395542-116396044	Barretts	OAC	OK	36.6094	21.9494	-0.738032	-0.724364	0.14345	0.437563	no
chr10_116409176_116409677	chr10_116409176_116409677	-	chr10:116409175-116409677	Barretts	OAC	OK	30.4301	20.5654	-0.565281	-0.533946	0.28915	0.600655	no
chr10_1195676_1196177	chr10_1195676_1196177	-	chr10:1195675-1196177	Barretts	OAC	OK	62.1972	22.7058	-1.45379	-1.55393	0.004	0.0922437	no
chr10_1205415_1205916	chr10_1205415_1205916	-	chr10:1205414-1205916	Barretts	OAC	OK	21.7505	19.4167	-0.163753	-0.144536	0.7747	0.906041	no
chr10_1208526_1209027	chr10_1208526_1209027	-	chr10:1208525-1209282	Barretts	OAC	OK	19.2442	16.3629	-0.233991	-0.142775	0.76895	0.903169	no
chr10_1208781_1209282	chr10_1208781_1209282	-	chr10:1208525-1209282	Barretts	OAC	OK	30.8322	14.7008	-1.06855	-0.751033	0.16155	0.462585	no
chr10_1228992_1229493	chr10_1228992_1229493	-	chr10:1228991-1229493	Barretts	OAC	OK	35.2538	14.7749	-1.25463	-1.21959	0.0223	0.190794	no
chr10_123996836_123997337	chr10_123996836_123997337	-	chr10:123996835-123997337	Barretts	OAC	OK	22.9234	54.6837	1.25429	1.11551	0.03145	0.22214	no
chr10_124017942_124018443	chr10_124017942_124018443	-	chr10:124017941-124018443	Barretts	OAC	OK	31.5702	12.9197	-1.28899	-1.17585	0.029	0.214768	no
chr10_124023870_124024371	chr10_124023870_124024371	-	chr10:124023869-124024371	Barretts	OAC	OK	53.1126	71.6108	0.431121	0.466994	0.3619	0.664106	no
chr10_124027215_124027716	chr10_124027215_124027716	-	chr10:124027214-124027974	Barretts	OAC	OK	24.9966	57.5972	1.20427	0.80768	0.18615	0.492937	no
chr10_124027473_124027974	chr10_124027473_124027974	-	chr10:124027214-124027974	Barretts	OAC	OK	49.533	96.3537	0.959951	0.890917	0.0672	0.311258	no
chr10_124036307_124036808	chr10_124036307_124036808	-	chr10:124036306-124036808	Barretts	OAC	OK	27.1785	53.3363	0.97265	0.976932	0.0575	0.290604	no
chr10_124039114_124039615	chr10_124039114_124039615	-	chr10:124039113-124039615	Barretts	OAC	OK	45.848	63.4386	0.468501	0.492894	0.31915	0.628766	no
chr10_124050272_124050773	chr10_124050272_124050773	-	chr10:124050271-124050773	Barretts	OAC	OK	32.675	66.1402	1.01734	1.05473	0.043	0.255957	no
chr10_124053042_124053543	chr10_124053042_124053543	-	chr10:124053041-124053974	Barretts	OAC	OK	34.9542	82.2533	1.23461	0.719634	0.1232	0.410023	no
chr10_124053473_124053974	chr10_124053473_124053974	-	chr10:124053041-124053974	Barretts	OAC	OK	50.002	227.78	2.18759	2.15656	0.0003	0.0240152	yes
chr10_124058249_124058750	chr10_124058249_124058750	-	chr10:124058248-124059001	Barretts	OAC	OK	60.4045	87.4931	0.534512	0.548118	0.2898	0.601571	no
chr10_124058500_124059001	chr10_124058500_124059001	-	chr10:124058248-124059001	Barretts	OAC	OK	26.764	27.0715	0.0164791	0.00863655	0.9836	0.988799	no
chr10_124067412_124067913	chr10_124067412_124067913	-	chr10:124067411-124067913	Barretts	OAC	OK	37.463	70.4402	0.910933	0.951973	0.0554	0.286137	no
chr10_124069711_124070212	chr10_124069711_124070212	-	chr10:124069710-124070623	Barretts	OAC	OK	64.5458	133.831	1.05202	0.893212	0.0636	0.303952	no
chr10_124070122_124070623	chr10_124070122_124070623	-	chr10:124069710-124070623	Barretts	OAC	OK	73.8288	200.8	1.4435	1.49269	0.00635	0.112989	no
chr10_124083743_124084244	chr10_124083743_124084244	-	chr10:124083742-124084244	Barretts	OAC	OK	27.4496	43.4118	0.661298	0.629374	0.206	0.518042	no
chr10_124091125_124091626	chr10_124091125_124091626	-	chr10:124091124-124091626	Barretts	OAC	OK	36.3088	64.2591	0.823582	0.921133	0.0647	0.306112	no
chr10_124098350_124098851	chr10_124098350_124098851	-	chr10:124098349-124099059	Barretts	OAC	OK	78.237	152.501	0.962899	0.873669	0.07495	0.327837	no
chr10_124098558_124099059	chr10_124098558_124099059	-	chr10:124098349-124099059	Barretts	OAC	OK	71.3764	112.266	0.653404	0.519587	0.33135	0.638866	no
chr10_124104153_124104654	chr10_124104153_124104654	-	chr10:124104152-124104654	Barretts	OAC	OK	65.2335	199.383	1.61186	2.0451	0.0003	0.0240152	yes
chr10_124107994_124108495	chr10_124107994_124108495	-	chr10:124107993-124108898	Barretts	OAC	OK	34.0634	71.1332	1.0623	0.891633	0.09775	0.370523	no
chr10_124108397_124108898	chr10_124108397_124108898	-	chr10:124107993-124108898	Barretts	OAC	OK	17.7216	65.6491	1.88927	1.31609	0.012	0.146722	no
chr10_124110309_124110810	chr10_124110309_124110810	-	chr10:124110308-124110810	Barretts	OAC	OK	45.0435	112.052	1.31478	1.48417	0.0044	0.0964841	no
chr10_124127812_124128313	chr10_124127812_124128313	-	chr10:124127811-124128313	Barretts	OAC	OK	24.115	12.1238	-0.992092	-0.889476	0.09285	0.361658	no
chr10_124133110_124133611	chr10_124133110_124133611	-	chr10:124133109-124133611	Barretts	OAC	OK	26.9918	45.606	0.756701	0.752923	0.13755	0.429308	no
chr10_124133850_124134351	chr10_124133850_124134351	-	chr10:124133849-124135052	Barretts	OAC	OK	349.589	591.782	0.759405	1.24021	0.01365	0.154375	no
chr10_124134226_124134727	chr10_124134226_124134727	-	chr10:124133849-124135052	Barretts	OAC	OK	17.1333	74.3572	2.11767	0.883055	0.2522	0.566076	no
chr10_124134414_124134915	chr10_124134414_124134915	-	chr10:124133849-124135052	Barretts	OAC	OK	36.4532	63.3879	0.79816	0.346653	0.50965	0.766644	no
chr10_124134551_124135052	chr10_124134551_124135052	-	chr10:124133849-124135052	Barretts	OAC	OK	51.8762	113.212	1.12588	0.665756	0.2352	0.547432	no
chr10_124201420_124201921	chr10_124201420_124201921	-	chr10:124201419-124201921	Barretts	OAC	OK	40.3732	43.6159	0.111457	0.113846	0.8145	0.92475	no
chr10_124206510_124207011	chr10_124206510_124207011	-	chr10:124206509-124207011	Barretts	OAC	OK	22.1756	9.77429	-1.18191	-1.05573	0.0439	0.257821	no
chr10_124220836_124221337	chr10_124220836_124221337	-	chr10:124220835-124221778	Barretts	OAC	OK	34.2849	61.3301	0.839022	0.663257	0.2371	0.549687	no
chr10_124221277_124221778	chr10_124221277_124221778	-	chr10:124220835-124221778	Barretts	OAC	OK	52.7871	43.6562	-0.273999	-0.194373	0.6535	0.846552	no
chr10_124235688_124236189	chr10_124235688_124236189	-	chr10:124235687-124236189	Barretts	OAC	OK	38.7035	11.5973	-1.73867	-1.58406	0.00605	0.110648	no
chr10_124246824_124247325	chr10_124246824_124247325	-	chr10:124246823-124247325	Barretts	OAC	OK	42.395	19.9364	-1.08849	-1.09397	0.03765	0.240824	no
chr10_124255426_124255927	chr10_124255426_124255927	-	chr10:124255425-124255927	Barretts	OAC	OK	13.9912	17.08	0.287783	0.242024	0.6245	0.831377	no
chr10_124264022_124264523	chr10_124264022_124264523	-	chr10:124264021-124264523	Barretts	OAC	OK	74.5336	41.6489	-0.839614	-0.937605	0.06615	0.308995	no
chr10_124285270_124285771	chr10_124285270_124285771	-	chr10:124285269-124285771	Barretts	OAC	OK	38.4839	28.0413	-0.456699	-0.458469	0.36495	0.665809	no
chr10_124291295_124291796	chr10_124291295_124291796	-	chr10:124291294-124291943	Barretts	OAC	OK	25.2126	40.6271	0.6883	0.443667	0.4232	0.710064	no
chr10_124291442_124291943	chr10_124291442_124291943	-	chr10:124291294-124291943	Barretts	OAC	OK	28.165	64.3344	1.19169	0.886633	0.0775	0.334164	no
chr10_124292032_124292533	chr10_124292032_124292533	-	chr10:124292031-124292825	Barretts	OAC	OK	11.5169	40.5943	1.81752	1.10251	0.0343	0.231696	no
chr10_124292324_124292825	chr10_124292324_124292825	-	chr10:124292031-124292825	Barretts	OAC	OK	15.2078	33.1165	1.12274	0.718634	0.18315	0.489459	no
chr10_124316948_124317449	chr10_124316948_124317449	-	chr10:124316947-124317449	Barretts	OAC	OK	19.1121	26.6112	0.477553	0.45086	0.36825	0.668223	no
chr10_124335823_124336324	chr10_124335823_124336324	-	chr10:124335822-124336324	Barretts	OAC	OK	23.4737	20.1851	-0.217757	-0.210575	0.6564	0.847975	no
chr10_124349561_124350062	chr10_124349561_124350062	-	chr10:124349560-124350062	Barretts	OAC	OK	27.2575	8.06127	-1.75757	-1.40499	0.0112	0.142546	no
chr10_124391470_124391971	chr10_124391470_124391971	-	chr10:124391469-124391971	Barretts	OAC	OK	31.267	17.2447	-0.858483	-0.811744	0.09465	0.365197	no
chr10_124407774_124408275	chr10_124407774_124408275	-	chr10:124407773-124409091	Barretts	OAC	OK	28.1877	17.6129	-0.678436	-0.329052	0.4511	0.728784	no
chr10_124408159_124408660	chr10_124408159_124408660	-	chr10:124407773-124409091	Barretts	OAC	OK	55.2817	35.6516	-0.632836	-0.522779	0.28755	0.599079	no
chr10_124408590_124409091	chr10_124408590_124409091	-	chr10:124407773-124409091	Barretts	OAC	OK	14.021	37.4405	1.41701	0.722691	0.2371	0.549687	no
chr10_124416667_124417168	chr10_124416667_124417168	-	chr10:124416666-124417168	Barretts	OAC	OK	35.3132	16.4538	-1.10179	-1.045	0.04595	0.263083	no
chr10_124448021_124448522	chr10_124448021_124448522	-	chr10:124448020-124448522	Barretts	OAC	OK	27.3392	17.0735	-0.679212	-0.653913	0.19495	0.504425	no
chr10_1244596_1245097	chr10_1244596_1245097	-	chr10:1244595-1245097	Barretts	OAC	OK	38.3353	20.0183	-0.937355	-0.87812	0.0829	0.344439	no
chr10_124463318_124463819	chr10_124463318_124463819	-	chr10:124463317-124463819	Barretts	OAC	OK	64.0723	44.6245	-0.521865	-0.563263	0.2529	0.566333	no
chr10_1250279_1250780	chr10_1250279_1250780	-	chr10:1250278-1251014	Barretts	OAC	OK	25.5356	8.27025	-1.62651	-0.918073	0.0787	0.336298	no
chr10_1250513_1251014	chr10_1250513_1251014	-	chr10:1250278-1251014	Barretts	OAC	OK	15.7428	12.4638	-0.336946	-0.198009	0.71145	0.875627	no
chr10_127844611_127845112	chr10_127844611_127845112	-	chr10:127844610-127845112	Barretts	OAC	OK	22.5156	15.589	-0.530394	-0.466749	0.33615	0.642837	no
chr10_127892771_127893272	chr10_127892771_127893272	-	chr10:127892770-127893272	Barretts	OAC	OK	19.9013	6.80932	-1.54728	-1.20394	0.03965	0.24664	no
chr10_127913185_127913686	chr10_127913185_127913686	-	chr10:127913184-127913686	Barretts	OAC	OK	28.4218	9.31383	-1.60955	-1.32384	0.0107	0.139549	no
chr10_127931447_127931948	chr10_127931447_127931948	-	chr10:127931446-127931948	Barretts	OAC	OK	35.1125	10.0793	-1.80058	-1.58296	0.0057	0.10758	no
chr10_127935960_127936461	chr10_127935960_127936461	-	chr10:127935959-127936461	Barretts	OAC	OK	28.2731	29.9307	0.0821964	0.0799525	0.87335	0.948107	no
chr10_128025875_128026376	chr10_128025875_128026376	-	chr10:128025874-128026376	Barretts	OAC	OK	35.7464	22.4621	-0.670305	-0.678049	0.1846	0.490998	no
chr10_128039074_128039575	chr10_128039074_128039575	-	chr10:128039073-128039575	Barretts	OAC	OK	30.058	13.2245	-1.18454	-1.1542	0.02775	0.210525	no
chr10_128065492_128065993	chr10_128065492_128065993	-	chr10:128065491-128065993	Barretts	OAC	OK	27.4168	11.605	-1.24031	-0.99833	0.0469	0.265381	no
chr10_1281042_1281543	chr10_1281042_1281543	-	chr10:1281041-1281543	Barretts	OAC	OK	43.6147	9.63323	-2.17872	-1.83004	0.0036	0.088095	no
chr10_128110316_128110817	chr10_128110316_128110817	-	chr10:128110315-128110817	Barretts	OAC	OK	27.159	7.56211	-1.84457	-1.54262	0.0099	0.134768	no
chr10_128148613_128149114	chr10_128148613_128149114	-	chr10:128148612-128149114	Barretts	OAC	OK	23.9296	27.6123	0.206512	0.200365	0.68995	0.864504	no
chr10_128151902_128152403	chr10_128151902_128152403	-	chr10:128151901-128152403	Barretts	OAC	OK	21.5751	14.0224	-0.62163	-0.561604	0.2605	0.573868	no
chr10_128192612_128193113	chr10_128192612_128193113	-	chr10:128192611-128193739	Barretts	OAC	OK	56.5502	30.978	-0.868287	-0.72776	0.15355	0.452197	no
chr10_128192870_128193371	chr10_128192870_128193371	-	chr10:128192611-128193739	Barretts	OAC	OK	18.6642	13.6499	-0.451382	-0.196498	0.73065	0.885672	no
chr10_128193238_128193739	chr10_128193238_128193739	-	chr10:128192611-128193739	Barretts	OAC	OK	17.265	15.2043	-0.183371	-0.0883235	0.8694	0.946924	no
chr10_128200361_128200862	chr10_128200361_128200862	-	chr10:128200360-128200862	Barretts	OAC	OK	20.3452	9.16672	-1.15021	-0.914727	0.0698	0.316811	no
chr10_128209770_128210271	chr10_128209770_128210271	-	chr10:128209769-128210271	Barretts	OAC	OK	18.6602	8.08744	-1.20621	-0.949581	0.0618	0.299805	no
chr10_128224685_128225186	chr10_128224685_128225186	-	chr10:128224684-128225186	Barretts	OAC	OK	29.3275	10.3439	-1.50347	-1.31086	0.01515	0.161381	no
chr10_128254082_128254583	chr10_128254082_128254583	-	chr10:128254081-128254583	Barretts	OAC	OK	18.1025	7.61354	-1.24955	-1.02715	0.05635	0.288307	no
chr10_128259731_128260232	chr10_128259731_128260232	-	chr10:128259730-128260232	Barretts	OAC	OK	27.3332	10.754	-1.34578	-1.2098	0.02115	0.186405	no
chr10_128286531_128287032	chr10_128286531_128287032	-	chr10:128286530-128287032	Barretts	OAC	OK	41.7368	28.9642	-0.527049	-0.539782	0.2677	0.581489	no
chr10_128319245_128319746	chr10_128319245_128319746	-	chr10:128319244-128319746	Barretts	OAC	OK	20.036	8.1606	-1.29584	-1.00906	0.04805	0.268463	no
chr10_1290299_1290800	chr10_1290299_1290800	-	chr10:1290298-1290800	Barretts	OAC	OK	20.0735	9.28857	-1.11176	-0.952469	0.06235	0.300839	no
chr10_129492764_129493265	chr10_129492764_129493265	-	chr10:129492763-129493265	Barretts	OAC	OK	38.4838	42.0788	0.128839	0.130018	0.79525	0.916535	no
chr10_129510946_129511447	chr10_129510946_129511447	-	chr10:129510945-129511447	Barretts	OAC	OK	24.978	9.99457	-1.32144	-1.12866	0.0292	0.215333	no
chr10_129536721_129537222	chr10_129536721_129537222	-	chr10:129536720-129537222	Barretts	OAC	OK	34.224	15.8908	-1.10681	-1.03414	0.0438	0.257679	no
chr10_129544085_129544586	chr10_129544085_129544586	-	chr10:129544084-129544586	Barretts	OAC	OK	12.7568	2.51006	-2.34547	-0.978843	0.05845	0.292393	no
chr10_129631993_129632494	chr10_129631993_129632494	-	chr10:129631992-129632494	Barretts	OAC	NOTEST	10.9251	4.05332	-1.43046	0	1	1	no
chr10_129632530_129633031	chr10_129632530_129633031	-	chr10:129632529-129633031	Barretts	OAC	OK	32.7486	11.8619	-1.4651	-1.32638	0.0115	0.144359	no
chr10_129652145_129652646	chr10_129652145_129652646	-	chr10:129652144-129653132	Barretts	OAC	OK	85.2055	65.3746	-0.382216	-0.414876	0.39805	0.6908	no
chr10_129652631_129653132	chr10_129652631_129653132	-	chr10:129652144-129653132	Barretts	OAC	OK	24.7136	10.046	-1.29868	-0.540465	0.37995	0.677139	no
chr10_129669822_129670323	chr10_129669822_129670323	-	chr10:129669821-129670518	Barretts	OAC	OK	15.3202	17.7151	0.209553	0.12631	0.80635	0.921574	no
chr10_129670017_129670518	chr10_129670017_129670518	-	chr10:129669821-129670518	Barretts	OAC	OK	31.0587	11.3926	-1.4469	-0.906359	0.1055	0.383959	no
chr10_129670613_129671114	chr10_129670613_129671114	-	chr10:129670612-129671611	Barretts	OAC	OK	40.4741	18.3898	-1.13809	-0.64635	0.30705	0.618863	no
chr10_129671110_129671611	chr10_129671110_129671611	-	chr10:129670612-129671611	Barretts	OAC	OK	96.1153	123.085	0.356812	0.424309	0.38735	0.682296	no
chr10_129677901_129678402	chr10_129677901_129678402	-	chr10:129677900-129678402	Barretts	OAC	OK	27.7376	14.4702	-0.938764	-0.864868	0.08945	0.355736	no
chr10_129679432_129679933	chr10_129679432_129679933	-	chr10:129679431-129679933	Barretts	OAC	OK	121.672	185.133	0.605564	0.83074	0.09505	0.366051	no
chr10_129681033_129681534	chr10_129681033_129681534	-	chr10:129681032-129681534	Barretts	OAC	OK	62.5205	45.8454	-0.447552	-0.505121	0.3223	0.631391	no
chr10_129684798_129685299	chr10_129684798_129685299	-	chr10:129684797-129685299	Barretts	OAC	OK	69.8447	128.157	0.875688	1.10273	0.0283	0.212522	no
chr10_129687035_129687536	chr10_129687035_129687536	-	chr10:129687034-129687536	Barretts	OAC	OK	48.3453	57.6635	0.254283	0.266385	0.58195	0.808291	no
chr10_129691030_129691531	chr10_129691030_129691531	-	chr10:129691029-129691531	Barretts	OAC	OK	70.749	90.856	0.360871	0.434361	0.36955	0.669222	no
chr10_129704767_129705268	chr10_129704767_129705268	-	chr10:129704766-129705474	Barretts	OAC	OK	89.5062	169.286	0.919405	0.787302	0.12	0.405969	no
chr10_129704973_129705474	chr10_129704973_129705474	-	chr10:129704766-129705474	Barretts	OAC	OK	191.911	210.563	0.133809	0.154348	0.75255	0.895353	no
chr10_129710754_129711255	chr10_129710754_129711255	-	chr10:129710753-129711255	Barretts	OAC	OK	25.6708	14.7023	-0.804092	-0.712405	0.16235	0.463884	no
chr10_129712216_129712717	chr10_129712216_129712717	-	chr10:129712215-129712717	Barretts	OAC	OK	23.4857	11.1693	-1.07224	-0.968031	0.0567	0.288952	no
chr10_129718878_129719379	chr10_129718878_129719379	-	chr10:129718877-129719379	Barretts	OAC	OK	29.76	18.1871	-0.710457	-0.682217	0.16825	0.471268	no
chr10_129721122_129721623	chr10_129721122_129721623	-	chr10:129721121-129721623	Barretts	OAC	OK	41.2602	85.5765	1.05246	1.18138	0.0186	0.176771	no
chr10_129723598_129724099	chr10_129723598_129724099	-	chr10:129723597-129724099	Barretts	OAC	OK	37.3492	35.1512	-0.087501	-0.0911019	0.8518	0.93999	no
chr10_129737948_129738449	chr10_129737948_129738449	-	chr10:129737947-129738449	Barretts	OAC	OK	26.2928	13.1854	-0.995731	-0.900483	0.08365	0.345822	no
chr10_129743593_129744094	chr10_129743593_129744094	-	chr10:129743592-129744094	Barretts	OAC	OK	44.947	57.5678	0.357039	0.404625	0.42	0.707696	no
chr10_129760363_129760864	chr10_129760363_129760864	-	chr10:129760362-129760864	Barretts	OAC	OK	34.3238	10.9685	-1.64584	-1.43752	0.00935	0.132244	no
chr10_12976725_12977226	chr10_12976725_12977226	-	chr10:12976724-12977226	Barretts	OAC	OK	31.7006	33.4788	0.0787371	0.069525	0.8896	0.955393	no
chr10_129772062_129772563	chr10_129772062_129772563	-	chr10:129772061-129772563	Barretts	OAC	OK	22.0591	7.84726	-1.49111	-1.18196	0.03	0.218001	no
chr10_129775842_129776343	chr10_129775842_129776343	-	chr10:129775841-129776343	Barretts	OAC	OK	33.3564	41.2788	0.307435	0.330422	0.50205	0.761992	no
chr10_129781567_129782068	chr10_129781567_129782068	-	chr10:129781566-129782430	Barretts	OAC	OK	24.8255	23.2129	-0.0968972	-0.0522267	0.9197	0.969304	no
chr10_129781929_129782430	chr10_129781929_129782430	-	chr10:129781566-129782430	Barretts	OAC	OK	51.7633	77.1507	0.575749	0.587883	0.246	0.558933	no
chr10_129794789_129795290	chr10_129794789_129795290	-	chr10:129794788-129795290	Barretts	OAC	NOTEST	10.879	5.21978	-1.05948	0	1	1	no
chr10_129809506_129810007	chr10_129809506_129810007	-	chr10:129809505-129810007	Barretts	OAC	OK	98.562	110.043	0.158965	0.207818	0.67325	0.85618	no
chr10_129820586_129821087	chr10_129820586_129821087	-	chr10:129820585-129821087	Barretts	OAC	OK	28.6461	16.1438	-0.827358	-0.780875	0.10975	0.39173	no
chr10_129833756_129834257	chr10_129833756_129834257	-	chr10:129833755-129834257	Barretts	OAC	OK	44.001	32.5633	-0.43429	-0.462045	0.36135	0.663792	no
chr10_129835349_129835850	chr10_129835349_129835850	-	chr10:129835348-129835850	Barretts	OAC	OK	57.5176	27.8559	-1.04602	-1.04374	0.0352	0.234053	no
chr10_129845559_129846060	chr10_129845559_129846060	-	chr10:129845558-129846060	Barretts	OAC	OK	335.885	374.129	0.155565	0.253912	0.60415	0.820856	no
chr10_129867515_129868016	chr10_129867515_129868016	-	chr10:129867514-129868016	Barretts	OAC	OK	66.3332	37.7767	-0.812233	-0.904537	0.07805	0.335166	no
chr10_129876653_129877154	chr10_129876653_129877154	-	chr10:129876652-129877154	Barretts	OAC	OK	30.9604	31.4347	0.0219356	0.0230787	0.97045	0.986408	no
chr10_129884561_129885062	chr10_129884561_129885062	-	chr10:129884560-129885062	Barretts	OAC	OK	25.8469	10.1129	-1.3538	-1.15733	0.02495	0.199726	no
chr10_129886524_129887025	chr10_129886524_129887025	-	chr10:129886523-129887025	Barretts	OAC	OK	41.3693	34.0522	-0.280812	-0.289972	0.5567	0.795658	no
chr10_129893249_129893750	chr10_129893249_129893750	-	chr10:129893248-129894156	Barretts	OAC	OK	18.6147	3.34552	-2.47614	-0.927008	0.06695	0.310762	no
chr10_129893424_129893925	chr10_129893424_129893925	-	chr10:129893248-129894156	Barretts	OAC	NOTEST	9.29252	3.49292	-1.41164	0	1	1	no
chr10_129893655_129894156	chr10_129893655_129894156	-	chr10:129893248-129894156	Barretts	OAC	OK	25.1122	12.2841	-1.03159	-0.769786	0.1354	0.427035	no
chr10_129924220_129924721	chr10_129924220_129924721	-	chr10:129924219-129925360	Barretts	OAC	OK	39.6707	32.8421	-0.272526	-0.126705	0.8168	0.925706	no
chr10_129924574_129925075	chr10_129924574_129925075	-	chr10:129924219-129925360	Barretts	OAC	OK	140.808	161.753	0.200065	0.23728	0.64405	0.840943	no
chr10_129924859_129925360	chr10_129924859_129925360	-	chr10:129924219-129925360	Barretts	OAC	OK	45.0695	49.1988	0.126473	0.084637	0.87095	0.947634	no
chr10_13002459_13002960	chr10_13002459_13002960	-	chr10:13002458-13002960	Barretts	OAC	OK	47.4373	17.1557	-1.46733	-1.45872	0.0065	0.114257	no
chr10_13015096_13015597	chr10_13015096_13015597	-	chr10:13015095-13015597	Barretts	OAC	OK	50.0027	27.5576	-0.859555	-0.818417	0.1191	0.404654	no
chr10_13017172_13017673	chr10_13017172_13017673	-	chr10:13017171-13017673	Barretts	OAC	OK	26.3276	6.17537	-2.09198	-1.59489	0.01245	0.149289	no
chr10_13082188_13082689	chr10_13082188_13082689	-	chr10:13082187-13082689	Barretts	OAC	OK	61.4228	42.4997	-0.531323	-0.598882	0.22005	0.531718	no
chr10_13096022_13096523	chr10_13096022_13096523	-	chr10:13096021-13096523	Barretts	OAC	OK	22.855	8.71675	-1.39065	-1.15626	0.0341	0.231063	no
chr10_13116779_13117280	chr10_13116779_13117280	-	chr10:13116778-13117280	Barretts	OAC	OK	38.6492	25.198	-0.617127	-0.631406	0.2062	0.518358	no
chr10_13140978_13141479	chr10_13140978_13141479	-	chr10:13140977-13141479	Barretts	OAC	OK	52.261	43.866	-0.252632	-0.281197	0.56505	0.799649	no
chr10_13141560_13142061	chr10_13141560_13142061	-	chr10:13141559-13142871	Barretts	OAC	OK	59.0883	68.1291	0.205399	0.136943	0.77445	0.905997	no
chr10_13141811_13142312	chr10_13141811_13142312	-	chr10:13141559-13142871	Barretts	OAC	OK	75.6085	146.237	0.951689	0.8514	0.0975	0.370326	no
chr10_13142196_13142697	chr10_13142196_13142697	-	chr10:13141559-13142871	Barretts	OAC	OK	38.2907	43.0769	0.169921	0.0868324	0.8693	0.946908	no
chr10_13142370_13142871	chr10_13142370_13142871	-	chr10:13141559-13142871	Barretts	OAC	OK	42.4632	66.1825	0.640236	0.389516	0.46765	0.739465	no
chr10_1314892_1315393	chr10_1314892_1315393	-	chr10:1314891-1315393	Barretts	OAC	OK	41.6685	15.0397	-1.47018	-1.38304	0.01075	0.139887	no
chr10_13149531_13150032	chr10_13149531_13150032	-	chr10:13149530-13150446	Barretts	OAC	OK	58.0368	121.527	1.06623	1.0526	0.0428	0.2555	no
chr10_13149945_13150446	chr10_13149945_13150446	-	chr10:13149530-13150446	Barretts	OAC	OK	68.7665	83.3321	0.277166	0.254527	0.59665	0.816143	no
chr10_13157812_13158313	chr10_13157812_13158313	-	chr10:13157811-13158313	Barretts	OAC	OK	47.7968	43.9986	-0.119459	-0.130856	0.79685	0.917344	no
chr10_13158359_13158860	chr10_13158359_13158860	-	chr10:13158358-13158860	Barretts	OAC	OK	34.1925	36.2547	0.0844876	0.0881832	0.8597	0.943352	no
chr10_13203181_13203682	chr10_13203181_13203682	-	chr10:13203180-13203682	Barretts	OAC	OK	369.119	407.535	0.142835	0.256847	0.60295	0.820025	no
chr10_13261859_13262360	chr10_13261859_13262360	-	chr10:13261858-13262360	Barretts	OAC	OK	33.9148	37.506	0.145208	0.156091	0.74645	0.89291	no
chr10_13312827_13313328	chr10_13312827_13313328	-	chr10:13312826-13313328	Barretts	OAC	OK	41.3025	40.7789	-0.0184062	-0.0202354	0.97795	0.98745	no
chr10_13313488_13313989	chr10_13313488_13313989	-	chr10:13313487-13313989	Barretts	OAC	OK	37.5433	54.4071	0.535238	0.590417	0.234	0.546443	no
chr10_1331827_1332328	chr10_1331827_1332328	-	chr10:1331826-1332328	Barretts	OAC	OK	46.1586	24.8388	-0.894006	-0.939983	0.06475	0.306265	no
chr10_13325211_13325712	chr10_13325211_13325712	-	chr10:13325210-13325712	Barretts	OAC	OK	35.0246	36.7704	0.070173	0.0674547	0.89265	0.956793	no
chr10_13341369_13341870	chr10_13341369_13341870	-	chr10:13341368-13342366	Barretts	OAC	OK	92.7177	117.891	0.346536	0.332513	0.5139	0.768753	no
chr10_13341865_13342366	chr10_13341865_13342366	-	chr10:13341368-13342366	Barretts	OAC	OK	150.833	225.355	0.579251	0.755462	0.12935	0.419154	no
chr10_13343931_13344432	chr10_13343931_13344432	-	chr10:13343930-13344698	Barretts	OAC	OK	91.186	132.28	0.536708	0.492557	0.33105	0.63859	no
chr10_13344197_13344698	chr10_13344197_13344698	-	chr10:13343930-13344698	Barretts	OAC	OK	181.582	342.681	0.916239	1.312	0.01045	0.137785	no
chr10_13352563_13353064	chr10_13352563_13353064	-	chr10:13352562-13353064	Barretts	OAC	OK	24.3882	11.1234	-1.13258	-1.02395	0.0525	0.279705	no
chr10_13379843_13380344	chr10_13379843_13380344	-	chr10:13379842-13380344	Barretts	OAC	OK	30.9925	6.28338	-2.30231	-1.70742	0.00865	0.128393	no
chr10_13389107_13389608	chr10_13389107_13389608	-	chr10:13389106-13390569	Barretts	OAC	OK	30.8169	28.9182	-0.0917424	-0.0403257	0.9488	0.980709	no
chr10_13389209_13389710	chr10_13389209_13389710	-	chr10:13389106-13390569	Barretts	OAC	OK	31.2426	39.8844	0.352313	0.178703	0.7271	0.883675	no
chr10_13389595_13390096	chr10_13389595_13390096	-	chr10:13389106-13390569	Barretts	OAC	OK	55.5893	80.8088	0.539707	0.402586	0.4279	0.713959	no
chr10_13389764_13390265	chr10_13389764_13390265	-	chr10:13389106-13390569	Barretts	OAC	OK	33.1751	36.9279	0.154609	0.0754811	0.88205	0.951805	no
chr10_13390068_13390569	chr10_13390068_13390569	-	chr10:13389106-13390569	Barretts	OAC	OK	85.1881	83.8976	-0.0220228	-0.0187331	0.9716	0.986424	no
chr10_13391873_13392374	chr10_13391873_13392374	-	chr10:13391872-13392374	Barretts	OAC	OK	55.4182	45.6302	-0.280372	-0.312921	0.51625	0.770382	no
chr10_1339695_1340196	chr10_1339695_1340196	-	chr10:1339694-1340196	Barretts	OAC	OK	27.1089	16.1229	-0.749651	-0.717204	0.15835	0.458398	no
chr10_13407208_13407709	chr10_13407208_13407709	-	chr10:13407207-13407709	Barretts	OAC	OK	16.6055	6.82418	-1.28294	-0.878953	0.0793	0.337578	no
chr10_13413856_13414357	chr10_13413856_13414357	-	chr10:13413855-13414357	Barretts	OAC	OK	57.8617	67.2121	0.216113	0.256368	0.60035	0.818311	no
chr10_13424734_13425235	chr10_13424734_13425235	-	chr10:13424733-13425891	Barretts	OAC	OK	51.5797	62.8917	0.286068	0.230512	0.6532	0.846384	no
chr10_13425029_13425530	chr10_13425029_13425530	-	chr10:13424733-13425891	Barretts	OAC	OK	39.679	49.58	0.321383	0.22386	0.66535	0.851701	no
chr10_13425390_13425891	chr10_13425390_13425891	-	chr10:13424733-13425891	Barretts	OAC	OK	51.7284	91.7898	0.827377	0.730022	0.13825	0.430564	no
chr10_13432590_13433091	chr10_13432590_13433091	-	chr10:13432589-13433592	Barretts	OAC	OK	15.7854	21.5881	0.451643	0.316574	0.547	0.789376	no
chr10_13433091_13433592	chr10_13433091_13433592	-	chr10:13432589-13433592	Barretts	OAC	OK	18.3978	9.33283	-0.979144	-0.525445	0.2706	0.583385	no
chr10_13442419_13442920	chr10_13442419_13442920	-	chr10:13442418-13442920	Barretts	OAC	OK	41.3948	19.5394	-1.08306	-1.01593	0.0384	0.243254	no
chr10_13446703_13447204	chr10_13446703_13447204	-	chr10:13446702-13447204	Barretts	OAC	OK	95.7953	36.8394	-1.3787	-1.52433	0.00515	0.103721	no
chr10_13456823_13457324	chr10_13456823_13457324	-	chr10:13456822-13457324	Barretts	OAC	OK	79.3123	82.7378	0.0610024	0.0746646	0.88655	0.953912	no
chr10_13459494_13459995	chr10_13459494_13459995	-	chr10:13459493-13459995	Barretts	OAC	OK	25.4727	15.3987	-0.726144	-0.687831	0.16305	0.46493	no
chr10_13481575_13482076	chr10_13481575_13482076	-	chr10:13481574-13482076	Barretts	OAC	OK	34.1055	18.5878	-0.875647	-0.900679	0.0773	0.333756	no
chr10_13482148_13482649	chr10_13482148_13482649	-	chr10:13482147-13482878	Barretts	OAC	OK	40.4556	24.0695	-0.749134	-0.472879	0.342	0.648387	no
chr10_13482377_13482878	chr10_13482377_13482878	-	chr10:13482147-13482878	Barretts	OAC	OK	48.0191	41.825	-0.199241	-0.164716	0.7409	0.890379	no
chr10_13495824_13496325	chr10_13495824_13496325	-	chr10:13495823-13496325	Barretts	OAC	OK	23.5527	19.4046	-0.279489	-0.228166	0.62915	0.834124	no
chr10_13525909_13526410	chr10_13525909_13526410	-	chr10:13525908-13526410	Barretts	OAC	OK	63.1679	56.8329	-0.152464	-0.167281	0.73305	0.887191	no
chr10_13542317_13542818	chr10_13542317_13542818	-	chr10:13542316-13542818	Barretts	OAC	OK	22.3757	10.6932	-1.06524	-0.870009	0.078	0.335075	no
chr10_13570328_13570829	chr10_13570328_13570829	-	chr10:13570327-13571550	Barretts	OAC	OK	26.0293	16.3862	-0.667654	-0.292962	0.6226	0.830438	no
chr10_13570481_13570982	chr10_13570481_13570982	-	chr10:13570327-13571550	Barretts	OAC	OK	24.7203	18.9014	-0.387205	-0.136325	0.75975	0.898882	no
chr10_13570848_13571349	chr10_13570848_13571349	-	chr10:13570327-13571550	Barretts	OAC	OK	47.1028	36.4525	-0.369798	-0.227452	0.7103	0.875197	no
chr10_13571049_13571550	chr10_13571049_13571550	-	chr10:13570327-13571550	Barretts	OAC	OK	25.2613	25.9602	0.0393688	0.0187255	0.97045	0.986408	no
chr10_13578670_13579171	chr10_13578670_13579171	-	chr10:13578669-13579171	Barretts	OAC	OK	47.5023	35.2298	-0.431202	-0.460868	0.35685	0.660232	no
chr10_21581719_21582220	chr10_21581719_21582220	-	chr10:21581718-21582220	Barretts	OAC	OK	27.9304	20.5019	-0.446076	-0.441518	0.36965	0.669368	no
chr10_21604230_21604731	chr10_21604230_21604731	-	chr10:21604229-21604731	Barretts	OAC	OK	38.6654	18.2446	-1.08357	-1.11	0.03015	0.218316	no
chr10_21604737_21605238	chr10_21604737_21605238	-	chr10:21604736-21605238	Barretts	OAC	OK	38.6989	17.8788	-1.11404	-1.05823	0.0463	0.263959	no
chr10_21618876_21619377	chr10_21618876_21619377	-	chr10:21618875-21619377	Barretts	OAC	OK	25.466	24.0935	-0.0799331	-0.0773267	0.8834	0.952494	no
chr10_21625700_21626201	chr10_21625700_21626201	-	chr10:21625699-21626201	Barretts	OAC	OK	24.8327	21.1817	-0.229424	-0.216665	0.66835	0.853283	no
chr10_21653300_21653801	chr10_21653300_21653801	-	chr10:21653299-21653801	Barretts	OAC	OK	19.6731	33.0235	0.74727	0.709312	0.15605	0.45545	no
chr10_21661784_21662285	chr10_21661784_21662285	-	chr10:21661783-21662285	Barretts	OAC	OK	97.5263	51.9489	-0.908699	-1.002	0.0506	0.274582	no
chr10_21784502_21785003	chr10_21784502_21785003	-	chr10:21784501-21785003	Barretts	OAC	OK	70.6728	83.7445	0.244841	0.304744	0.5455	0.788944	no
chr10_21785042_21785543	chr10_21785042_21785543	-	chr10:21785041-21785976	Barretts	OAC	OK	54.4331	37.3436	-0.543624	-0.46876	0.3448	0.650836	no
chr10_21785475_21785976	chr10_21785475_21785976	-	chr10:21785041-21785976	Barretts	OAC	OK	61.2149	36.7373	-0.736637	-0.643241	0.2139	0.526316	no
chr10_21786029_21786530	chr10_21786029_21786530	-	chr10:21786028-21786530	Barretts	OAC	OK	48.5761	53.5936	0.141812	0.160736	0.744	0.891945	no
chr10_21794547_21795048	chr10_21794547_21795048	-	chr10:21794546-21795048	Barretts	OAC	NOTEST	12.0298	4.7088	-1.35318	0	1	1	no
chr10_21805073_21805574	chr10_21805073_21805574	-	chr10:21805072-21805574	Barretts	OAC	OK	44.3418	15.7274	-1.49539	-1.5056	0.00365	0.0886334	no
chr10_21805658_21806159	chr10_21805658_21806159	-	chr10:21805657-21806552	Barretts	OAC	OK	48.4718	20.3704	-1.25068	-0.996127	0.06015	0.296002	no
chr10_21806051_21806552	chr10_21806051_21806552	-	chr10:21805657-21806552	Barretts	OAC	OK	31.3591	13.9008	-1.17372	-0.721128	0.1747	0.480067	no
chr10_21814490_21814991	chr10_21814490_21814991	-	chr10:21814489-21815511	Barretts	OAC	OK	54.0754	56.1221	0.0535952	0.0402469	0.93725	0.977036	no
chr10_21814717_21815218	chr10_21814717_21815218	-	chr10:21814489-21815511	Barretts	OAC	OK	45.4777	42.9265	-0.0832888	-0.055297	0.9129	0.965785	no
chr10_21815010_21815511	chr10_21815010_21815511	-	chr10:21814489-21815511	Barretts	OAC	OK	39.1435	38.5386	-0.0224699	-0.0150219	0.9811	0.988174	no
chr10_21815911_21816412	chr10_21815911_21816412	-	chr10:21815910-21816412	Barretts	OAC	OK	41.9263	43.068	0.0387627	0.0419716	0.9343	0.975626	no
chr10_21822238_21822739	chr10_21822238_21822739	-	chr10:21822237-21823305	Barretts	OAC	OK	27.5936	22.9656	-0.264858	-0.102126	0.85435	0.940866	no
chr10_21822455_21822956	chr10_21822455_21822956	-	chr10:21822237-21823305	Barretts	OAC	OK	113.159	109.708	-0.0446853	-0.0399168	0.94075	0.978546	no
chr10_21822804_21823305	chr10_21822804_21823305	-	chr10:21822237-21823305	Barretts	OAC	OK	162.147	299.074	0.883203	1.08952	0.0325	0.225531	no
chr10_21823491_21823992	chr10_21823491_21823992	-	chr10:21823490-21824219	Barretts	OAC	OK	55.9065	41.7351	-0.421756	-0.353066	0.4954	0.758745	no
chr10_21823718_21824219	chr10_21823718_21824219	-	chr10:21823490-21824219	Barretts	OAC	OK	27.4635	34.4063	0.325156	0.189751	0.68525	0.862247	no
chr10_21856077_21856578	chr10_21856077_21856578	-	chr10:21856076-21856578	Barretts	OAC	OK	56.026	24.3304	-1.20333	-1.21638	0.01925	0.178848	no
chr10_21873739_21874240	chr10_21873739_21874240	-	chr10:21873738-21874240	Barretts	OAC	OK	16.5581	13.039	-0.3447	-0.291109	0.57355	0.804388	no
chr10_22013571_22014072	chr10_22013571_22014072	-	chr10:22013570-22014072	Barretts	OAC	OK	44.2045	27.6367	-0.677604	-0.696899	0.16265	0.464246	no
chr10_22016593_22017094	chr10_22016593_22017094	-	chr10:22016592-22017094	Barretts	OAC	OK	53.1646	33.3517	-0.672704	-0.690993	0.1731	0.477819	no
chr10_22021038_22021539	chr10_22021038_22021539	-	chr10:22021037-22021539	Barretts	OAC	OK	29.2894	18.8481	-0.635955	-0.609957	0.223	0.535464	no
chr10_22031536_22032037	chr10_22031536_22032037	-	chr10:22031535-22032037	Barretts	OAC	OK	18.8228	12.2054	-0.624958	-0.533013	0.2997	0.611088	no
chr10_22033114_22033615	chr10_22033114_22033615	-	chr10:22033113-22033615	Barretts	OAC	OK	14.2049	16.7919	0.241376	0.21228	0.65705	0.848154	no
chr10_22043461_22043962	chr10_22043461_22043962	-	chr10:22043460-22043962	Barretts	OAC	OK	27.5561	12.0759	-1.19024	-1.08982	0.03765	0.240824	no
chr10_27207980_27208481	chr10_27207980_27208481	-	chr10:27207979-27208481	Barretts	OAC	NOTEST	4.56311	3.18474	-0.518841	0	1	1	no
chr10_27220127_27220628	chr10_27220127_27220628	-	chr10:27220126-27220628	Barretts	OAC	OK	59.0693	73.0047	0.305581	0.353022	0.4722	0.742714	no
chr10_27388906_27389407	chr10_27388906_27389407	-	chr10:27388905-27389685	Barretts	OAC	OK	88.431	83.4433	-0.0837563	-0.078745	0.8734	0.948107	no
chr10_27389184_27389685	chr10_27389184_27389685	-	chr10:27388905-27389685	Barretts	OAC	OK	123.745	102.464	-0.272242	-0.300262	0.5501	0.791717	no
chr10_27443092_27443593	chr10_27443092_27443593	-	chr10:27443091-27443593	Barretts	OAC	OK	106.71	142.986	0.42218	0.576088	0.2446	0.557024	no
chr10_27443642_27444143	chr10_27443642_27444143	-	chr10:27443641-27445271	Barretts	OAC	OK	38.0598	40.3156	0.083068	0.0439784	0.9354	0.976248	no
chr10_27443920_27444421	chr10_27443920_27444421	-	chr10:27443641-27445271	Barretts	OAC	OK	163.346	217.087	0.410339	0.468368	0.3309	0.638407	no
chr10_27444323_27444824	chr10_27444323_27444824	-	chr10:27443641-27445271	Barretts	OAC	OK	64.0904	70.481	0.137125	0.0873868	0.8807	0.951311	no
chr10_27444770_27445271	chr10_27444770_27445271	-	chr10:27443641-27445271	Barretts	OAC	OK	52.8742	57.0704	0.110178	0.0649122	0.90205	0.960851	no
chr10_27529256_27529757	chr10_27529256_27529757	-	chr10:27529255-27530007	Barretts	OAC	OK	138.749	156.793	0.176387	0.216903	0.6622	0.850294	no
chr10_27529506_27530007	chr10_27529506_27530007	-	chr10:27529255-27530007	Barretts	OAC	OK	70.148	77.7283	0.148038	0.120723	0.8102	0.922677	no
chr10_27530229_27530730	chr10_27530229_27530730	-	chr10:27530228-27531346	Barretts	OAC	OK	35.956	55.4526	0.625025	0.323293	0.55805	0.796508	no
chr10_27530580_27531081	chr10_27530580_27531081	-	chr10:27530228-27531346	Barretts	OAC	OK	56.3167	68.2197	0.276626	0.189468	0.7251	0.882661	no
chr10_27530845_27531346	chr10_27530845_27531346	-	chr10:27530228-27531346	Barretts	OAC	OK	208.121	228.765	0.136442	0.179827	0.7169	0.878082	no
chr10_27541247_27541748	chr10_27541247_27541748	-	chr10:27541246-27542027	Barretts	OAC	OK	88.8273	126.325	0.508064	0.56827	0.2492	0.562534	no
chr10_27541526_27542027	chr10_27541526_27542027	-	chr10:27541246-27542027	Barretts	OAC	OK	29.2762	33.563	0.197141	0.102263	0.8632	0.944692	no
chr10_27547639_27548140	chr10_27547639_27548140	-	chr10:27547638-27548360	Barretts	OAC	OK	29.519	24.7096	-0.256575	-0.198585	0.70175	0.870829	no
chr10_27547859_27548360	chr10_27547859_27548360	-	chr10:27547638-27548360	Barretts	OAC	OK	32.9145	22.988	-0.517843	-0.400204	0.4285	0.714203	no
chr10_27573948_27574449	chr10_27573948_27574449	-	chr10:27573947-27574449	Barretts	OAC	OK	20.7108	13.9957	-0.565392	-0.508626	0.3134	0.623534	no
chr10_27588056_27588557	chr10_27588056_27588557	-	chr10:27588055-27588946	Barretts	OAC	OK	20.5589	23.9924	0.222816	0.13084	0.7712	0.904169	no
chr10_27588445_27588946	chr10_27588445_27588946	-	chr10:27588055-27588946	Barretts	OAC	OK	27.3812	37.2247	0.443073	0.342255	0.5331	0.781626	no
chr10_27608516_27609017	chr10_27608516_27609017	-	chr10:27608515-27609276	Barretts	OAC	OK	45.6725	35.0202	-0.383141	-0.242976	0.65415	0.846861	no
chr10_27608775_27609276	chr10_27608775_27609276	-	chr10:27608515-27609276	Barretts	OAC	OK	96.9436	80.2346	-0.272922	-0.27762	0.57195	0.803406	no
chr10_27643517_27644018	chr10_27643517_27644018	-	chr10:27643516-27644018	Barretts	OAC	OK	23.1496	21.774	-0.0883803	-0.0836079	0.8718	0.947729	no
chr10_27648685_27649186	chr10_27648685_27649186	-	chr10:27648684-27649186	Barretts	OAC	OK	28.5677	16.992	-0.749525	-0.719181	0.14405	0.43828	no
chr10_27649440_27649941	chr10_27649440_27649941	-	chr10:27649439-27649941	Barretts	OAC	OK	54.4146	31.4921	-0.789004	-0.855581	0.08225	0.34346	no
chr10_27672819_27673320	chr10_27672819_27673320	-	chr10:27672818-27673320	Barretts	OAC	OK	38.1238	56.4277	0.56571	0.629829	0.22005	0.531718	no
chr10_30100527_30101028	chr10_30100527_30101028	-	chr10:30100526-30101522	Barretts	OAC	OK	26.244	5.33811	-2.29759	-1.23327	0.03075	0.220053	no
chr10_30101021_30101522	chr10_30101021_30101522	-	chr10:30100526-30101522	Barretts	OAC	OK	23.9303	11.4804	-1.05966	-0.768416	0.1569	0.456432	no
chr10_30106135_30106636	chr10_30106135_30106636	-	chr10:30106134-30106636	Barretts	OAC	OK	16.8726	10.6491	-0.663949	-0.527321	0.27105	0.583957	no
chr10_30115532_30116033	chr10_30115532_30116033	-	chr10:30115531-30116033	Barretts	OAC	OK	14.8737	5.17664	-1.52267	-1.09026	0.0653	0.307364	no
chr10_30130796_30131297	chr10_30130796_30131297	-	chr10:30130795-30131297	Barretts	OAC	OK	63.693	55.9018	-0.188239	-0.201528	0.6935	0.866272	no
chr10_30138278_30138779	chr10_30138278_30138779	-	chr10:30138277-30138779	Barretts	OAC	OK	26.6222	9.11972	-1.54557	-1.31916	0.0175	0.171948	no
chr10_30147326_30147827	chr10_30147326_30147827	-	chr10:30147325-30147827	Barretts	OAC	OK	32.3936	24.9962	-0.374001	-0.381458	0.45015	0.72833	no
chr10_30151766_30152267	chr10_30151766_30152267	-	chr10:30151765-30152267	Barretts	OAC	OK	53.2901	40.1395	-0.408845	-0.432197	0.39555	0.688968	no
chr10_30154499_30155000	chr10_30154499_30155000	-	chr10:30154498-30155000	Barretts	OAC	OK	13.5695	29.1303	1.10215	1.01384	0.05125	0.276173	no
chr10_30170295_30170796	chr10_30170295_30170796	-	chr10:30170294-30170796	Barretts	OAC	OK	32.1653	7.91253	-2.02329	-1.57468	0.00595	0.109509	no
chr10_30197871_30198372	chr10_30197871_30198372	-	chr10:30197870-30198372	Barretts	OAC	OK	29.2665	11.7734	-1.31372	-1.12864	0.03195	0.223721	no
chr10_30235989_30236490	chr10_30235989_30236490	-	chr10:30235988-30236490	Barretts	OAC	OK	35.3368	16.5649	-1.09304	-1.04394	0.0453	0.260776	no
chr10_30237721_30238222	chr10_30237721_30238222	-	chr10:30237720-30238222	Barretts	OAC	OK	12.6383	1.60187	-2.97998	-1.14638	0.12385	0.411008	no
chr10_30240529_30241030	chr10_30240529_30241030	-	chr10:30240528-30241030	Barretts	OAC	OK	20.8761	6.68059	-1.6438	-1.23611	0.02845	0.213005	no
chr10_30248659_30249160	chr10_30248659_30249160	-	chr10:30248658-30249160	Barretts	OAC	OK	29.9615	5.50696	-2.44378	-1.63309	0.008	0.12481	no
chr10_30287191_30287692	chr10_30287191_30287692	-	chr10:30287190-30287692	Barretts	OAC	OK	71.3763	42.6937	-0.74142	-0.812486	0.11345	0.396483	no
chr10_30291284_30291785	chr10_30291284_30291785	-	chr10:30291283-30291785	Barretts	OAC	OK	63.2877	37.6439	-0.749508	-0.822226	0.10545	0.383857	no
chr10_30315996_30316497	chr10_30315996_30316497	-	chr10:30315995-30316656	Barretts	OAC	OK	69.6555	34.7626	-1.0027	-0.886372	0.10175	0.377572	no
chr10_30316155_30316656	chr10_30316155_30316656	-	chr10:30315995-30316656	Barretts	OAC	OK	57.2875	20.1021	-1.51087	-0.982252	0.0468	0.265289	no
chr10_30327549_30328050	chr10_30327549_30328050	-	chr10:30327548-30328050	Barretts	OAC	OK	22.3985	6.36837	-1.81441	-1.32357	0.01995	0.181573	no
chr10_30330759_30331260	chr10_30330759_30331260	-	chr10:30330758-30331260	Barretts	OAC	OK	30.0961	6.2845	-2.25971	-1.67147	0.00715	0.119701	no
chr10_30336824_30337325	chr10_30336824_30337325	-	chr10:30336823-30337325	Barretts	OAC	OK	30.2661	12.9593	-1.22371	-1.05188	0.0447	0.259294	no
chr10_30338033_30338534	chr10_30338033_30338534	-	chr10:30338032-30338534	Barretts	OAC	OK	22.8096	4.63008	-2.30053	-1.6297	0.02025	0.182728	no
chr10_30347793_30348294	chr10_30347793_30348294	-	chr10:30347792-30348769	Barretts	OAC	OK	48.8627	17.7371	-1.46196	-0.897417	0.0768	0.332628	no
chr10_30348268_30348769	chr10_30348268_30348769	-	chr10:30347792-30348769	Barretts	OAC	OK	80.1899	37.2869	-1.10475	-1.06719	0.0459	0.262926	no
chr10_30357408_30357909	chr10_30357408_30357909	-	chr10:30357407-30357909	Barretts	OAC	OK	55.621	32.3555	-0.781619	-0.77115	0.1285	0.417799	no
chr10_30388619_30389120	chr10_30388619_30389120	-	chr10:30388618-30389120	Barretts	OAC	OK	24.3635	35.8515	0.55731	0.492268	0.34075	0.647156	no
chr10_30423247_30423748	chr10_30423247_30423748	-	chr10:30423246-30423748	Barretts	OAC	OK	30.4187	8.72392	-1.80191	-1.35505	0.01365	0.154375	no
chr10_30440912_30441413	chr10_30440912_30441413	-	chr10:30440911-30441413	Barretts	OAC	OK	41.5635	35.5155	-0.22687	-0.231452	0.648	0.842908	no
chr10_30449355_30449856	chr10_30449355_30449856	-	chr10:30449354-30449856	Barretts	OAC	OK	41.6913	12.152	-1.77855	-1.38766	0.01655	0.167384	no
chr10_30471664_30472165	chr10_30471664_30472165	-	chr10:30471663-30472165	Barretts	OAC	OK	32.6295	24.4681	-0.415272	-0.397045	0.42235	0.709527	no
chr10_30475471_30475972	chr10_30475471_30475972	-	chr10:30475470-30476123	Barretts	OAC	OK	47.7372	40.5094	-0.236856	-0.218677	0.6573	0.848193	no
chr10_30475622_30476123	chr10_30475622_30476123	-	chr10:30475470-30476123	Barretts	OAC	OK	20.1893	14.4438	-0.483138	-0.240906	0.6665	0.852364	no
chr10_30488221_30488722	chr10_30488221_30488722	-	chr10:30488220-30488722	Barretts	OAC	OK	31.9693	15.341	-1.0593	-1.02658	0.04695	0.265577	no
chr10_30508780_30509281	chr10_30508780_30509281	-	chr10:30508779-30509487	Barretts	OAC	OK	25.8928	3.26076	-2.98927	-1.09129	0.06315	0.303061	no
chr10_30508986_30509487	chr10_30508986_30509487	-	chr10:30508779-30509487	Barretts	OAC	OK	17.2699	10.555	-0.710329	-0.42357	0.38625	0.681496	no
chr10_30519890_30520391	chr10_30519890_30520391	-	chr10:30519889-30520391	Barretts	OAC	OK	50.2639	43.6085	-0.204912	-0.227895	0.64525	0.8415	no
chr10_30529963_30530464	chr10_30529963_30530464	-	chr10:30529962-30530464	Barretts	OAC	OK	41.7368	15.8061	-1.40084	-1.42114	0.0079	0.124196	no
chr10_30536608_30537109	chr10_30536608_30537109	-	chr10:30536607-30537109	Barretts	OAC	OK	37.953	28.4495	-0.415809	-0.428843	0.39	0.684264	no
chr10_30560756_30561257	chr10_30560756_30561257	-	chr10:30560755-30561257	Barretts	OAC	OK	19.7494	23.5564	0.254314	0.238876	0.6238	0.831113	no
chr10_43832275_43832776	chr10_43832275_43832776	-	chr10:43832274-43832776	Barretts	OAC	OK	26.4414	25.3386	-0.0614642	-0.0622076	0.89425	0.95734	no
chr10_43836000_43836501	chr10_43836000_43836501	-	chr10:43835999-43836501	Barretts	OAC	OK	91.9379	152.397	0.7291	0.956675	0.0555	0.286314	no
chr10_43843840_43844341	chr10_43843840_43844341	-	chr10:43843839-43844341	Barretts	OAC	OK	95.8564	142.543	0.572455	0.767891	0.12615	0.414141	no
chr10_43845591_43846092	chr10_43845591_43846092	-	chr10:43845590-43846092	Barretts	OAC	OK	33.655	56.8508	0.756358	0.833386	0.09775	0.370523	no
chr10_43851309_43851810	chr10_43851309_43851810	-	chr10:43851308-43851810	Barretts	OAC	OK	107.567	135.525	0.333321	0.456031	0.3653	0.665994	no
chr10_43857352_43857853	chr10_43857352_43857853	-	chr10:43857351-43858384	Barretts	OAC	OK	38.9709	78.2461	1.00562	0.572852	0.2587	0.571493	no
chr10_43857580_43858081	chr10_43857580_43858081	-	chr10:43857351-43858384	Barretts	OAC	OK	134.212	294.098	1.13178	1.36325	0.0093	0.131912	no
chr10_43857883_43858384	chr10_43857883_43858384	-	chr10:43857351-43858384	Barretts	OAC	OK	70.1421	116.855	0.736361	0.588951	0.2399	0.553158	no
chr10_43866832_43867333	chr10_43866832_43867333	-	chr10:43866831-43867333	Barretts	OAC	OK	33.8886	60.2027	0.829027	0.88746	0.071	0.319138	no
chr10_43870876_43871377	chr10_43870876_43871377	-	chr10:43870875-43871377	Barretts	OAC	OK	50.1139	57.7441	0.204463	0.236556	0.63205	0.835554	no
chr10_43872696_43873197	chr10_43872696_43873197	-	chr10:43872695-43873197	Barretts	OAC	OK	47.8645	102.774	1.10244	1.33463	0.0073	0.120417	no
chr10_43878889_43879390	chr10_43878889_43879390	-	chr10:43878888-43879390	Barretts	OAC	OK	24.7866	26.3964	0.0907828	0.0919755	0.85115	0.939651	no
chr10_43891434_43891935	chr10_43891434_43891935	-	chr10:43891433-43893048	Barretts	OAC	OK	87.0547	126.1	0.534574	0.378262	0.46195	0.735462	no
chr10_43891597_43892098	chr10_43891597_43892098	-	chr10:43891433-43893048	Barretts	OAC	OK	65.1085	97.9876	0.589752	0.313337	0.52195	0.774234	no
chr10_43891996_43892497	chr10_43891996_43892497	-	chr10:43891433-43893048	Barretts	OAC	OK	51.7554	110.472	1.0939	0.70262	0.17695	0.482782	no
chr10_43892244_43892745	chr10_43892244_43892745	-	chr10:43891433-43893048	Barretts	OAC	OK	16.7805	49.0854	1.54851	0.53103	0.53795	0.784673	no
chr10_43892416_43892917	chr10_43892416_43892917	-	chr10:43891433-43893048	Barretts	OAC	OK	50.7657	107.533	1.08285	0.575426	0.32005	0.629506	no
chr10_43892547_43893048	chr10_43892547_43893048	-	chr10:43891433-43893048	Barretts	OAC	OK	161.773	280.555	0.794316	0.823687	0.0978	0.370523	no
chr10_43903010_43903511	chr10_43903010_43903511	-	chr10:43903009-43903965	Barretts	OAC	OK	79.3143	172.617	1.12192	1.20532	0.01815	0.174687	no
chr10_43903464_43903965	chr10_43903464_43903965	-	chr10:43903009-43903965	Barretts	OAC	OK	67.5939	87.799	0.37731	0.319856	0.5342	0.78225	no
chr10_43904153_43904654	chr10_43904153_43904654	-	chr10:43904152-43905246	Barretts	OAC	OK	151.872	274.254	0.852663	0.952163	0.06115	0.298105	no
chr10_43904480_43904981	chr10_43904480_43904981	-	chr10:43904152-43905246	Barretts	OAC	OK	178.367	346.755	0.959065	1.15193	0.02565	0.202398	no
chr10_43904745_43905246	chr10_43904745_43905246	-	chr10:43904152-43905246	Barretts	OAC	OK	49.7263	97.242	0.967569	0.577088	0.24395	0.556532	no
chr10_43912156_43912657	chr10_43912156_43912657	-	chr10:43912155-43912657	Barretts	OAC	OK	7.9614	50.1257	2.65446	2.12141	0.0053	0.104269	no
chr10_43915805_43916306	chr10_43915805_43916306	-	chr10:43915804-43916924	Barretts	OAC	OK	99.0546	169.521	0.77517	0.875042	0.08755	0.353018	no
chr10_43916202_43916703	chr10_43916202_43916703	-	chr10:43915804-43916924	Barretts	OAC	OK	50.8003	122.664	1.27181	1.04653	0.04125	0.251073	no
chr10_43916423_43916924	chr10_43916423_43916924	-	chr10:43915804-43916924	Barretts	OAC	OK	34.9345	42.0362	0.266978	0.152059	0.7655	0.901547	no
chr10_43931723_43932224	chr10_43931723_43932224	-	chr10:43931722-43933039	Barretts	OAC	OK	50.6965	89.2998	0.816769	0.491767	0.3315	0.638927	no
chr10_43931998_43932499	chr10_43931998_43932499	-	chr10:43931722-43933039	Barretts	OAC	OK	142.747	241.708	0.759804	0.799024	0.1058	0.384649	no
chr10_43932286_43932787	chr10_43932286_43932787	-	chr10:43931722-43933039	Barretts	OAC	OK	134.951	190.086	0.494215	0.506899	0.32065	0.63001	no
chr10_43932538_43933039	chr10_43932538_43933039	-	chr10:43931722-43933039	Barretts	OAC	OK	51.2681	97.7132	0.930492	0.601352	0.25395	0.566901	no
chr10_43950792_43951293	chr10_43950792_43951293	-	chr10:43950791-43951519	Barretts	OAC	OK	177.232	294.896	0.734566	0.827656	0.10025	0.375245	no
chr10_43951018_43951519	chr10_43951018_43951519	-	chr10:43950791-43951519	Barretts	OAC	OK	222.132	471.928	1.08715	1.48286	0.00385	0.090462	no
chr10_43957419_43957920	chr10_43957419_43957920	-	chr10:43957418-43957920	Barretts	OAC	OK	42.626	39.5144	-0.109356	-0.118226	0.81615	0.925431	no
chr10_44069813_44070314	chr10_44069813_44070314	-	chr10:44069812-44070314	Barretts	OAC	OK	128.407	175.379	0.44975	0.630678	0.2004	0.511151	no
chr10_44081365_44081866	chr10_44081365_44081866	-	chr10:44081364-44081866	Barretts	OAC	OK	21.6192	39.3239	0.863093	0.829233	0.1056	0.384162	no
chr10_44082132_44082633	chr10_44082132_44082633	-	chr10:44082131-44082633	Barretts	OAC	OK	22.1756	18.8439	-0.234872	-0.218067	0.65835	0.848794	no
chr10_44090452_44090953	chr10_44090452_44090953	-	chr10:44090451-44091070	Barretts	OAC	OK	44.0627	28.021	-0.653049	-0.383252	0.4814	0.749645	no
chr10_44090569_44091070	chr10_44090569_44091070	-	chr10:44090451-44091070	Barretts	OAC	OK	35.9457	46.5928	0.374288	0.227554	0.62235	0.830229	no
chr10_44101632_44102133	chr10_44101632_44102133	-	chr10:44101631-44102410	Barretts	OAC	OK	91.1358	75.8174	-0.26549	-0.274115	0.5894	0.812481	no
chr10_44101909_44102410	chr10_44101909_44102410	-	chr10:44101631-44102410	Barretts	OAC	OK	45.1852	43.8451	-0.0434347	-0.030392	0.95315	0.982283	no
chr10_44143656_44144157	chr10_44143656_44144157	-	chr10:44143655-44145050	Barretts	OAC	OK	35.5256	23.9073	-0.571406	-0.228876	0.6461	0.841982	no
chr10_44143864_44144365	chr10_44143864_44144365	-	chr10:44143655-44145050	Barretts	OAC	OK	18.9277	57.0252	1.5911	0.725753	0.30815	0.619467	no
chr10_44144112_44144613	chr10_44144112_44144613	-	chr10:44143655-44145050	Barretts	OAC	OK	243.39	230.598	-0.0778894	-0.107697	0.82585	0.929408	no
chr10_44144549_44145050	chr10_44144549_44145050	-	chr10:44143655-44145050	Barretts	OAC	OK	27.6042	25.1418	-0.134803	-0.0560615	0.923	0.970578	no
chr10_44167048_44167549	chr10_44167048_44167549	-	chr10:44167047-44167549	Barretts	OAC	OK	52.281	44.6059	-0.229054	-0.253771	0.62065	0.829168	no
chr10_44183760_44184261	chr10_44183760_44184261	-	chr10:44183759-44184261	Barretts	OAC	OK	47.0258	69.3525	0.560496	0.623835	0.22095	0.53282	no
chr10_44184967_44185468	chr10_44184967_44185468	-	chr10:44184966-44186277	Barretts	OAC	OK	66.4657	83.0785	0.321864	0.258017	0.60745	0.823155	no
chr10_44185454_44185955	chr10_44185454_44185955	-	chr10:44184966-44186277	Barretts	OAC	OK	151.258	178.365	0.237825	0.294508	0.55075	0.792194	no
chr10_44185776_44186277	chr10_44185776_44186277	-	chr10:44184966-44186277	Barretts	OAC	OK	39.464	34.5012	-0.193887	-0.105624	0.8305	0.931506	no
chr10_44196667_44197168	chr10_44196667_44197168	-	chr10:44196666-44197168	Barretts	OAC	OK	23.2253	10.4462	-1.15271	-0.940299	0.0615	0.299058	no
chr10_44197657_44198158	chr10_44197657_44198158	-	chr10:44197656-44198158	Barretts	OAC	OK	32.454	18.8252	-0.785731	-0.774287	0.1199	0.405969	no
chr10_44203083_44203584	chr10_44203083_44203584	-	chr10:44203082-44203584	Barretts	OAC	OK	25.4266	12.6414	-1.00818	-0.894982	0.0744	0.326662	no
chr10_44210512_44211013	chr10_44210512_44211013	-	chr10:44210511-44211013	Barretts	OAC	NOTEST	11.5571	9.872	-0.227365	0	1	1	no
chr10_44277369_44277870	chr10_44277369_44277870	-	chr10:44277368-44277870	Barretts	OAC	OK	76.2762	57.4266	-0.409514	-0.474425	0.32835	0.636484	no
chr10_44280643_44281144	chr10_44280643_44281144	-	chr10:44280642-44281144	Barretts	OAC	OK	19.0364	7.86626	-1.27501	-0.977634	0.0559	0.287696	no
chr10_45647257_45647758	chr10_45647257_45647758	-	chr10:45647256-45647758	Barretts	OAC	OK	18.0262	10.4597	-0.785258	-0.656916	0.19475	0.504057	no
chr10_45651170_45651671	chr10_45651170_45651671	-	chr10:45651169-45651671	Barretts	OAC	OK	24.7992	15.857	-0.645174	-0.590088	0.2548	0.567668	no
chr10_45701088_45701589	chr10_45701088_45701589	-	chr10:45701087-45701589	Barretts	OAC	OK	21.0804	10.9958	-0.938946	-0.781019	0.12505	0.412318	no
chr10_45730622_45731123	chr10_45730622_45731123	-	chr10:45730621-45731123	Barretts	OAC	OK	45.0501	43.2848	-0.0576717	-0.0636142	0.8997	0.959952	no
chr10_45745206_45745707	chr10_45745206_45745707	-	chr10:45745205-45745707	Barretts	OAC	OK	15.4434	22.1827	0.522447	0.488184	0.35155	0.655722	no
chr10_45745774_45746275	chr10_45745774_45746275	-	chr10:45745773-45746275	Barretts	OAC	OK	25.2363	19.0093	-0.408798	-0.366466	0.4762	0.746208	no
chr10_45761500_45762001	chr10_45761500_45762001	-	chr10:45761499-45762001	Barretts	OAC	OK	19.8472	7.43975	-1.41561	-1.0628	0.05435	0.284085	no
chr10_45775471_45775972	chr10_45775471_45775972	-	chr10:45775470-45775972	Barretts	OAC	OK	35.0989	37.821	0.107762	0.0989864	0.8384	0.935119	no
chr10_45857511_45858012	chr10_45857511_45858012	-	chr10:45857510-45858372	Barretts	OAC	NOTEST	10.4609	10.3495	-0.0154478	0	1	1	no
chr10_45857871_45858372	chr10_45857871_45858372	-	chr10:45857510-45858372	Barretts	OAC	OK	22.0814	28.0435	0.344834	0.280055	0.58885	0.812334	no
chr10_45869057_45869558	chr10_45869057_45869558	-	chr10:45869056-45869879	Barretts	OAC	OK	62.0583	30.5032	-1.02466	-0.552711	0.2139	0.526316	no
chr10_45869268_45869769	chr10_45869268_45869769	-	chr10:45869056-45869879	Barretts	OAC	OK	14.6799	49.3154	1.7482	0.776757	0.21135	0.523804	no
chr10_45869378_45869879	chr10_45869378_45869879	-	chr10:45869056-45869879	Barretts	OAC	OK	52.3921	46.6364	-0.167893	-0.133525	0.79475	0.916232	no
chr10_45870063_45870564	chr10_45870063_45870564	-	chr10:45870062-45870564	Barretts	OAC	OK	53.9446	47.9572	-0.16973	-0.188747	0.7045	0.872594	no
chr10_45874381_45874882	chr10_45874381_45874882	-	chr10:45874380-45874882	Barretts	OAC	OK	35.9299	26.5548	-0.43621	-0.449144	0.36065	0.663491	no
chr10_45899415_45899916	chr10_45899415_45899916	-	chr10:45899414-45899916	Barretts	OAC	OK	23.2982	27.9389	0.262058	0.241564	0.63885	0.839234	no
chr10_45904315_45904816	chr10_45904315_45904816	-	chr10:45904314-45904816	Barretts	OAC	OK	17.9144	20.8991	0.222328	0.204406	0.6778	0.858455	no
chr10_45914322_45914823	chr10_45914322_45914823	-	chr10:45914321-45915212	Barretts	OAC	OK	79.3693	60.018	-0.403184	-0.408988	0.414	0.702823	no
chr10_45914711_45915212	chr10_45914711_45915212	-	chr10:45914321-45915212	Barretts	OAC	OK	55.0806	42.337	-0.379624	-0.314854	0.5254	0.776482	no
chr10_45915913_45916414	chr10_45915913_45916414	-	chr10:45915912-45916414	Barretts	OAC	OK	79.0773	51.2221	-0.626497	-0.724775	0.13635	0.428402	no
chr10_45921504_45922005	chr10_45921504_45922005	-	chr10:45921503-45922005	Barretts	OAC	OK	54.4996	59.6838	0.131095	0.148045	0.7678	0.902642	no
chr10_45938990_45939491	chr10_45938990_45939491	-	chr10:45938989-45939600	Barretts	OAC	OK	12.1419	28.9818	1.25516	0.701044	0.22035	0.53211	no
chr10_45939099_45939600	chr10_45939099_45939600	-	chr10:45938989-45939600	Barretts	OAC	OK	27.8638	14.5655	-0.935842	-0.548755	0.34815	0.653335	no
chr10_45948454_45948955	chr10_45948454_45948955	-	chr10:45948453-45948955	Barretts	OAC	OK	26.7842	18.032	-0.570823	-0.528117	0.29485	0.606302	no
chr10_45960373_45960874	chr10_45960373_45960874	-	chr10:45960372-45960874	Barretts	OAC	OK	56.379	60.633	0.104946	0.121887	0.7988	0.918226	no
chr10_46009642_46010143	chr10_46009642_46010143	-	chr10:46009641-46010143	Barretts	OAC	OK	20.0071	8.54184	-1.2279	-0.997246	0.04855	0.269506	no
chr10_46071338_46071839	chr10_46071338_46071839	-	chr10:46071337-46071839	Barretts	OAC	OK	13.688	8.19881	-0.739425	-0.555738	0.24975	0.563045	no
chr10_46076113_46076614	chr10_46076113_46076614	-	chr10:46076112-46077085	Barretts	OAC	OK	59.0205	23.9566	-1.30079	-1.15234	0.033	0.227055	no
chr10_46076584_46077085	chr10_46076584_46077085	-	chr10:46076112-46077085	Barretts	OAC	OK	22.3316	10.0136	-1.15713	-0.57661	0.2064	0.518561	no
chr10_46089809_46090310	chr10_46089809_46090310	-	chr10:46089808-46090588	Barretts	OAC	OK	38.7623	97.4188	1.32954	0.959183	0.0638	0.30421	no
chr10_46090087_46090588	chr10_46090087_46090588	-	chr10:46089808-46090588	Barretts	OAC	OK	135.252	199.021	0.557271	0.742437	0.14475	0.438989	no
chr10_46095996_46096497	chr10_46095996_46096497	-	chr10:46095995-46096883	Barretts	OAC	OK	18.5381	7.91866	-1.22716	-0.717141	0.20275	0.51399	no
chr10_46096199_46096700	chr10_46096199_46096700	-	chr10:46095995-46096883	Barretts	OAC	NOTEST	8.16806	5.46813	-0.578947	0	1	1	no
chr10_46096382_46096883	chr10_46096382_46096883	-	chr10:46095995-46096883	Barretts	OAC	NOTEST	9.25996	8.02708	-0.206129	0	1	1	no
chr10_5325128_5325629	chr10_5325128_5325629	-	chr10:5325127-5325882	Barretts	OAC	OK	19.1582	20.1528	0.073018	0.0451284	0.9331	0.975039	no
chr10_5325381_5325882	chr10_5325381_5325882	-	chr10:5325127-5325882	Barretts	OAC	OK	34.83	35.3858	0.0228405	0.0195442	0.97725	0.987229	no
chr10_5333617_5334118	chr10_5333617_5334118	-	chr10:5333616-5334118	Barretts	OAC	OK	43.8893	49.1402	0.163034	0.18066	0.7254	0.88275	no
chr10_5335549_5336050	chr10_5335549_5336050	-	chr10:5335548-5336498	Barretts	OAC	OK	35.5597	21.8542	-0.702331	-0.449108	0.38405	0.679911	no
chr10_5335997_5336498	chr10_5335997_5336498	-	chr10:5335548-5336498	Barretts	OAC	OK	42.2564	49.5437	0.229531	0.20552	0.6809	0.860004	no
chr10_5356797_5357298	chr10_5356797_5357298	-	chr10:5356796-5357298	Barretts	OAC	OK	31.7792	13.4148	-1.24425	-1.1618	0.0294	0.215439	no
chr10_5385462_5385963	chr10_5385462_5385963	-	chr10:5385461-5385963	Barretts	OAC	OK	13.9364	5.98035	-1.22056	-0.823128	0.10985	0.391805	no
chr10_5406915_5407416	chr10_5406915_5407416	-	chr10:5406914-5407883	Barretts	OAC	OK	24.4498	11.4075	-1.09984	-0.715882	0.1597	0.460087	no
chr10_5407382_5407883	chr10_5407382_5407883	-	chr10:5406914-5407883	Barretts	OAC	OK	33.0545	16.231	-1.0261	-0.809074	0.1214	0.40811	no
chr10_5444731_5445232	chr10_5444731_5445232	-	chr10:5444730-5445232	Barretts	OAC	OK	30.5855	22.7945	-0.424166	-0.42174	0.3942	0.687786	no
chr10_5446551_5447052	chr10_5446551_5447052	-	chr10:5446550-5447052	Barretts	OAC	OK	37.0854	24.8482	-0.577711	-0.60413	0.2179	0.53009	no
chr10_5454232_5454733	chr10_5454232_5454733	-	chr10:5454231-5455013	Barretts	OAC	OK	86.8482	87.8384	0.0163569	0.0172983	0.9699	0.986408	no
chr10_5454512_5455013	chr10_5454512_5455013	-	chr10:5454231-5455013	Barretts	OAC	OK	40.3874	54.6033	0.435085	0.316252	0.53035	0.780196	no
chr10_5488308_5488809	chr10_5488308_5488809	-	chr10:5488307-5488809	Barretts	OAC	OK	91.3903	267.085	1.54719	2.20121	5e-05	0.00707764	yes
chr10_5508004_5508505	chr10_5508004_5508505	-	chr10:5508003-5508954	Barretts	OAC	OK	36.0198	30.4316	-0.243219	-0.137607	0.7944	0.916123	no
chr10_5508235_5508736	chr10_5508235_5508736	-	chr10:5508003-5508954	Barretts	OAC	OK	17.1806	33.1217	0.946993	0.304856	0.4745	0.744717	no
chr10_5508453_5508954	chr10_5508453_5508954	-	chr10:5508003-5508954	Barretts	OAC	OK	88.0563	108.134	0.296318	0.313953	0.549	0.790951	no
chr10_5530222_5530723	chr10_5530222_5530723	-	chr10:5530221-5531181	Barretts	OAC	OK	76.1122	183.342	1.26834	1.19616	0.02285	0.19294	no
chr10_5530680_5531181	chr10_5530680_5531181	-	chr10:5530221-5531181	Barretts	OAC	OK	131.075	194.518	0.569514	0.638683	0.19465	0.503873	no
chr10_5538259_5538760	chr10_5538259_5538760	-	chr10:5538258-5538760	Barretts	OAC	OK	30.4449	57.9109	0.927635	0.992333	0.0465	0.264622	no
chr10_5545381_5545882	chr10_5545381_5545882	-	chr10:5545380-5545882	Barretts	OAC	OK	55.3405	89.676	0.696386	0.815332	0.09715	0.369803	no
chr10_5545900_5546401	chr10_5545900_5546401	-	chr10:5545899-5546401	Barretts	OAC	OK	16.6324	32.8538	0.982063	0.912287	0.0754	0.328937	no
chr10_5560064_5560565	chr10_5560064_5560565	-	chr10:5560063-5560565	Barretts	OAC	OK	23.4416	17.0724	-0.457406	-0.425262	0.3847	0.680174	no
chr10_5566500_5567001	chr10_5566500_5567001	-	chr10:5566499-5567001	Barretts	OAC	OK	25.9553	14.3826	-0.851702	-0.721213	0.1497	0.446535	no
chr10_5569771_5570272	chr10_5569771_5570272	-	chr10:5569770-5570272	Barretts	OAC	OK	26.5794	16.3869	-0.697767	-0.630633	0.1931	0.501763	no
chr10_5576230_5576731	chr10_5576230_5576731	-	chr10:5576229-5576731	Barretts	OAC	OK	45.4183	44.5286	-0.0285428	-0.0296361	0.94745	0.980381	no
chr10_5587843_5588344	chr10_5587843_5588344	-	chr10:5587842-5588344	Barretts	OAC	OK	144.387	220.497	0.610812	0.904392	0.06705	0.310811	no
chr10_5588715_5589216	chr10_5588715_5589216	-	chr10:5588714-5589216	Barretts	OAC	OK	131.798	219.829	0.73805	1.08557	0.0287	0.213774	no
chr10_5589877_5590378	chr10_5589877_5590378	-	chr10:5589876-5590378	Barretts	OAC	OK	121.976	223.46	0.87342	1.28541	0.01125	0.142921	no
chr10_5590451_5590952	chr10_5590451_5590952	-	chr10:5590450-5591244	Barretts	OAC	OK	38.1754	92.8105	1.28164	0.982086	0.06445	0.305677	no
chr10_5590743_5591244	chr10_5590743_5591244	-	chr10:5590450-5591244	Barretts	OAC	OK	89.8832	201.482	1.16453	1.41414	0.00645	0.113722	no
chr10_5605986_5606487	chr10_5605986_5606487	-	chr10:5605985-5606487	Barretts	OAC	OK	44.8332	38.1134	-0.234271	-0.250067	0.6222	0.830061	no
chr10_5616524_5617025	chr10_5616524_5617025	-	chr10:5616523-5617025	Barretts	OAC	OK	30.7408	21.4018	-0.522419	-0.516314	0.301	0.612197	no
chr10_5618635_5619136	chr10_5618635_5619136	-	chr10:5618634-5619136	Barretts	OAC	OK	23.4114	13.2377	-0.822559	-0.75175	0.14085	0.434119	no
chr10_5624668_5625169	chr10_5624668_5625169	-	chr10:5624667-5625169	Barretts	OAC	OK	29.2266	64.3945	1.13966	1.17364	0.0259	0.203449	no
chr10_5625527_5626028	chr10_5625527_5626028	-	chr10:5625526-5626244	Barretts	OAC	OK	42.7477	19.2047	-1.15439	-0.854268	0.15595	0.455387	no
chr10_5625743_5626244	chr10_5625743_5626244	-	chr10:5625526-5626244	Barretts	OAC	OK	12.9965	18.7188	0.526357	0.252809	0.5677	0.801061	no
chr10_5626975_5627476	chr10_5626975_5627476	-	chr10:5626974-5627476	Barretts	OAC	OK	34.7196	83.7766	1.2708	1.35048	0.00985	0.134768	no
chr10_5651824_5652325	chr10_5651824_5652325	-	chr10:5651823-5652325	Barretts	OAC	OK	71.3952	153.384	1.10325	1.44972	0.004	0.0922437	no
chr10_5652582_5653083	chr10_5652582_5653083	-	chr10:5652581-5653083	Barretts	OAC	OK	97.4015	209.208	1.10292	1.56559	0.00185	0.0644852	no
chr10_5653802_5654303	chr10_5653802_5654303	-	chr10:5653801-5654303	Barretts	OAC	OK	45.8006	58.7346	0.358843	0.41266	0.3961	0.689443	no
chr10_5665016_5665517	chr10_5665016_5665517	-	chr10:5665015-5665517	Barretts	OAC	OK	97.9622	146.73	0.582869	0.782535	0.11545	0.398754	no
chr10_5671750_5672251	chr10_5671750_5672251	-	chr10:5671749-5672251	Barretts	OAC	OK	59.3045	67.6401	0.189737	0.226298	0.63865	0.83921	no
chr10_5674323_5674824	chr10_5674323_5674824	-	chr10:5674322-5674824	Barretts	OAC	OK	56.1586	83.4354	0.571152	0.691465	0.1611	0.462085	no
chr10_5682048_5682549	chr10_5682048_5682549	-	chr10:5682047-5682549	Barretts	OAC	OK	30.5159	16.3797	-0.897651	-0.799456	0.1191	0.404654	no
chr10_5687190_5687691	chr10_5687190_5687691	-	chr10:5687189-5687691	Barretts	OAC	OK	39.7057	58.6925	0.56383	0.622277	0.1934	0.502093	no
chr10_5688484_5688985	chr10_5688484_5688985	-	chr10:5688483-5688985	Barretts	OAC	OK	53.6534	32.5545	-0.720815	-0.702819	0.16545	0.467486	no
chr10_5696109_5696610	chr10_5696109_5696610	-	chr10:5696108-5696610	Barretts	OAC	OK	26.5486	32.3544	0.285325	0.282398	0.5683	0.801577	no
chr10_5701123_5701624	chr10_5701123_5701624	-	chr10:5701122-5701624	Barretts	OAC	OK	38.585	31.0955	-0.311336	-0.328152	0.50555	0.763941	no
chr10_5701781_5702282	chr10_5701781_5702282	-	chr10:5701780-5702282	Barretts	OAC	OK	80.9506	95.3148	0.235659	0.299436	0.55335	0.793606	no
chr10_5708096_5708597	chr10_5708096_5708597	-	chr10:5708095-5708835	Barretts	OAC	OK	28.3507	31.9813	0.173842	0.10604	0.83925	0.935201	no
chr10_5708334_5708835	chr10_5708334_5708835	-	chr10:5708095-5708835	Barretts	OAC	OK	67.5933	89.7006	0.408237	0.443858	0.37475	0.673212	no
chr10_5726372_5726873	chr10_5726372_5726873	-	chr10:5726371-5727619	Barretts	OAC	OK	211.289	237.177	0.166742	0.228566	0.6425	0.840306	no
chr10_5726760_5727261	chr10_5726760_5727261	-	chr10:5726371-5727619	Barretts	OAC	OK	48.142	55.2593	0.198919	0.123146	0.81125	0.923181	no
chr10_5727118_5727619	chr10_5727118_5727619	-	chr10:5726371-5727619	Barretts	OAC	OK	46.0322	57.0571	0.309763	0.187391	0.7174	0.878355	no
chr10_5734530_5735031	chr10_5734530_5735031	-	chr10:5734529-5735031	Barretts	OAC	OK	66.1036	45.4581	-0.540193	-0.618993	0.21225	0.524702	no
chr10_5757721_5758222	chr10_5757721_5758222	-	chr10:5757720-5758222	Barretts	OAC	OK	23.222	18.6104	-0.319383	-0.296219	0.54455	0.788421	no
chr10_58120870_58121371	chr10_58120870_58121371	-	chr10:58120869-58121371	Barretts	OAC	OK	542.621	626.658	0.207735	0.383622	0.42115	0.708468	no
chr10_58207326_58207827	chr10_58207326_58207827	-	chr10:58207325-58207827	Barretts	OAC	OK	10.4745	15.9394	0.605709	0.495331	0.33645	0.643012	no
chr10_58364695_58365196	chr10_58364695_58365196	-	chr10:58364694-58365196	Barretts	OAC	OK	26.5933	21.7003	-0.293353	-0.275493	0.57575	0.805139	no
chr10_5854923_5855424	chr10_5854923_5855424	-	chr10:5854922-5856067	Barretts	OAC	OK	50.7407	60.0198	0.242294	0.125828	0.81835	0.926071	no
chr10_5855208_5855709	chr10_5855208_5855709	-	chr10:5854922-5856067	Barretts	OAC	OK	123.69	231.384	0.903561	0.821075	0.09425	0.364461	no
chr10_5855428_5855929	chr10_5855428_5855929	-	chr10:5854922-5856067	Barretts	OAC	OK	183.66	231.85	0.336153	0.345169	0.5102	0.766941	no
chr10_5855566_5856067	chr10_5855566_5856067	-	chr10:5854922-5856067	Barretts	OAC	OK	49.5197	59.2085	0.257802	0.136976	0.79555	0.916632	no
chr10_5874859_5875360	chr10_5874859_5875360	-	chr10:5874858-5875360	Barretts	OAC	OK	85.0469	98.4547	0.211202	0.266466	0.5906	0.812913	no
chr10_5882185_5882686	chr10_5882185_5882686	-	chr10:5882184-5882908	Barretts	OAC	OK	21.2755	17.0488	-0.319523	-0.195792	0.72825	0.884425	no
chr10_5882407_5882908	chr10_5882407_5882908	-	chr10:5882184-5882908	Barretts	OAC	OK	29.0802	10.2897	-1.49883	-0.690141	0.1599	0.460359	no
chr10_5894337_5894838	chr10_5894337_5894838	-	chr10:5894336-5894838	Barretts	OAC	OK	41.2474	35.9771	-0.197226	-0.210191	0.6735	0.856185	no
chr10_5895207_5895708	chr10_5895207_5895708	-	chr10:5895206-5895881	Barretts	OAC	OK	17.3508	20.9279	0.270424	0.132101	0.74995	0.894402	no
chr10_5895380_5895881	chr10_5895380_5895881	-	chr10:5895206-5895881	Barretts	OAC	OK	16.2401	28.1397	0.793052	0.497196	0.47145	0.742037	no
chr10_5903179_5903680	chr10_5903179_5903680	-	chr10:5903178-5903680	Barretts	OAC	OK	31.3528	56.1953	0.841853	0.852047	0.08885	0.354768	no
chr10_5915410_5915911	chr10_5915410_5915911	-	chr10:5915409-5915911	Barretts	OAC	OK	46.7412	23.4212	-0.996877	-1.06454	0.04045	0.249301	no
chr10_5917997_5918498	chr10_5917997_5918498	-	chr10:5917996-5918498	Barretts	OAC	OK	9.23206	14.6913	0.670242	0.524325	0.3056	0.617256	no
chr10_5924886_5925387	chr10_5924886_5925387	-	chr10:5924885-5925387	Barretts	OAC	OK	24.2335	27.1281	0.162783	0.164933	0.73555	0.888054	no
chr10_5930807_5931308	chr10_5930807_5931308	-	chr10:5930806-5931525	Barretts	OAC	OK	43.4383	48.6641	0.16389	0.133311	0.78355	0.910431	no
chr10_5931024_5931525	chr10_5931024_5931525	-	chr10:5930806-5931525	Barretts	OAC	OK	38.8921	50.2038	0.368321	0.304731	0.56595	0.800175	no
chr10_5931731_5932232	chr10_5931731_5932232	-	chr10:5931730-5932232	Barretts	OAC	OK	490.929	660.633	0.428335	0.822641	0.0909	0.357946	no
chr10_5985467_5985968	chr10_5985467_5985968	-	chr10:5985466-5985968	Barretts	OAC	OK	38.3627	54.5099	0.506814	0.547734	0.2819	0.59349	no
chr10_5986297_5986798	chr10_5986297_5986798	-	chr10:5986296-5987028	Barretts	OAC	OK	49.1792	70.7491	0.524664	0.47584	0.35235	0.6563	no
chr10_5986527_5987028	chr10_5986527_5987028	-	chr10:5986296-5987028	Barretts	OAC	OK	45.1381	59.0802	0.38833	0.324887	0.5241	0.775911	no
chr10_5991279_5991780	chr10_5991279_5991780	-	chr10:5991278-5991780	Barretts	OAC	OK	24.3407	46.0996	0.921384	0.93842	0.06365	0.303952	no
chr10_5992326_5992827	chr10_5992326_5992827	-	chr10:5992325-5992977	Barretts	OAC	OK	23.9677	29.4059	0.295016	0.203599	0.6636	0.8509	no
chr10_5992476_5992977	chr10_5992476_5992977	-	chr10:5992325-5992977	Barretts	OAC	OK	20.3895	19.6798	-0.0511062	-0.0312493	0.95765	0.983444	no
chr10_5992988_5993489	chr10_5992988_5993489	-	chr10:5992987-5993883	Barretts	OAC	OK	28.3802	59.0377	1.05675	0.863759	0.08595	0.349971	no
chr10_5993382_5993883	chr10_5993382_5993883	-	chr10:5992987-5993883	Barretts	OAC	OK	39.5183	53.5146	0.437411	0.38348	0.46345	0.736469	no
chr10_6013176_6013677	chr10_6013176_6013677	-	chr10:6013175-6013677	Barretts	OAC	OK	86.276	91.7229	0.0883225	0.111735	0.826	0.929427	no
chr10_6018776_6019277	chr10_6018776_6019277	-	chr10:6018775-6020235	Barretts	OAC	OK	41.8351	42.1615	0.011212	0.00609901	0.98915	0.990117	no
chr10_6018986_6019487	chr10_6018986_6019487	-	chr10:6018775-6020235	Barretts	OAC	OK	45.6536	37.3338	-0.290246	-0.150591	0.7672	0.902244	no
chr10_6019362_6019863	chr10_6019362_6019863	-	chr10:6018775-6020235	Barretts	OAC	OK	51.0931	114.795	1.16786	0.89735	0.09065	0.357731	no
chr10_6019588_6020089	chr10_6019588_6020089	-	chr10:6018775-6020235	Barretts	OAC	OK	110.825	141.847	0.356054	0.351079	0.4866	0.752904	no
chr10_6019734_6020235	chr10_6019734_6020235	-	chr10:6018775-6020235	Barretts	OAC	OK	40.1935	49.4247	0.298268	0.14027	0.8068	0.921577	no
chr10_6041367_6041868	chr10_6041367_6041868	-	chr10:6041366-6041868	Barretts	OAC	OK	30.9684	18.5408	-0.740089	-0.726089	0.15965	0.460019	no
chr10_6047930_6048431	chr10_6047930_6048431	-	chr10:6047929-6048431	Barretts	OAC	OK	18.3602	9.48964	-0.95216	-0.769505	0.1257	0.413287	no
chr10_6056032_6056533	chr10_6056032_6056533	-	chr10:6056031-6056533	Barretts	OAC	OK	39.0784	23.1155	-0.757512	-0.782657	0.11215	0.394753	no
chr10_6059652_6060153	chr10_6059652_6060153	-	chr10:6059651-6060153	Barretts	OAC	OK	20.8734	14.7691	-0.499077	-0.437075	0.3643	0.66546	no
chr10_6092607_6093108	chr10_6092607_6093108	-	chr10:6092606-6093447	Barretts	OAC	OK	74.5289	79.7815	0.0982547	0.102452	0.8326	0.932544	no
chr10_6092946_6093447	chr10_6092946_6093447	-	chr10:6092606-6093447	Barretts	OAC	OK	33.4012	33.2442	-0.00679862	-0.00415114	0.9829	0.988606	no
chr10_6095819_6096320	chr10_6095819_6096320	-	chr10:6095818-6096626	Barretts	OAC	OK	52.398	63.2937	0.27255	0.266544	0.602	0.819245	no
chr10_6096125_6096626	chr10_6096125_6096626	-	chr10:6095818-6096626	Barretts	OAC	OK	27.7156	28.2591	0.0280206	0.0181955	0.97645	0.987045	no
chr10_6110294_6110795	chr10_6110294_6110795	-	chr10:6110293-6110795	Barretts	OAC	OK	38.6934	11.8047	-1.71273	-1.54926	0.0059	0.109282	no
chr10_6116847_6117348	chr10_6116847_6117348	-	chr10:6116846-6117348	Barretts	OAC	OK	21.8462	11.1358	-0.972179	-0.848889	0.10535	0.383574	no
chr10_61268063_61268564	chr10_61268063_61268564	-	chr10:61268062-61268564	Barretts	OAC	OK	23.1128	14.5422	-0.668448	-0.596378	0.2358	0.547804	no
chr10_6128266_6128767	chr10_6128266_6128767	-	chr10:6128265-6128767	Barretts	OAC	OK	76.5059	79.4293	0.0541004	0.0674281	0.8933	0.956976	no
chr10_61296783_61297284	chr10_61296783_61297284	-	chr10:61296782-61297284	Barretts	OAC	OK	17.0561	4.68869	-1.86303	-1.34212	0.03665	0.237836	no
chr10_6130623_6131124	chr10_6130623_6131124	-	chr10:6130622-6131124	Barretts	OAC	OK	142.622	289.992	1.02382	1.57262	0.002	0.0667088	no
chr10_6131317_6131818	chr10_6131317_6131818	-	chr10:6131316-6131818	Barretts	OAC	OK	46.6562	46.6708	0.000451318	0.000492684	0.9812	0.988174	no
chr10_61368463_61368964	chr10_61368463_61368964	-	chr10:61368462-61368964	Barretts	OAC	OK	33.4091	51.1796	0.615326	0.528271	0.29515	0.606605	no
chr10_61382081_61382582	chr10_61382081_61382582	-	chr10:61382080-61382582	Barretts	OAC	OK	35.9011	39.9524	0.154256	0.167405	0.73055	0.885643	no
chr10_61385702_61386203	chr10_61385702_61386203	-	chr10:61385701-61386203	Barretts	OAC	OK	68.6046	50.178	-0.451251	-0.528498	0.274	0.586285	no
chr10_61438531_61439032	chr10_61438531_61439032	-	chr10:61438530-61439032	Barretts	OAC	OK	59.6091	39.1022	-0.60828	-0.650798	0.1903	0.497756	no
chr10_6144048_6144549	chr10_6144048_6144549	-	chr10:6144047-6144549	Barretts	OAC	OK	31.2971	27.1969	-0.20259	-0.203001	0.68475	0.861834	no
chr10_61461990_61462491	chr10_61461990_61462491	-	chr10:61461989-61462491	Barretts	OAC	OK	26.2105	21.1539	-0.309223	-0.271523	0.59425	0.81462	no
chr10_61468453_61468954	chr10_61468453_61468954	-	chr10:61468452-61468954	Barretts	OAC	OK	46.6855	25.2535	-0.88649	-0.886397	0.0806	0.340077	no
chr10_61469013_61469514	chr10_61469013_61469514	-	chr10:61469012-61469924	Barretts	OAC	OK	56.142	36.5511	-0.619165	-0.461565	0.34525	0.651098	no
chr10_61469423_61469924	chr10_61469423_61469924	-	chr10:61469012-61469924	Barretts	OAC	OK	54.5036	73.0006	0.421558	0.389365	0.44025	0.722042	no
chr10_61483724_61484225	chr10_61483724_61484225	-	chr10:61483723-61484493	Barretts	OAC	OK	111.716	115.864	0.0525955	0.0604962	0.8991	0.959852	no
chr10_61483992_61484493	chr10_61483992_61484493	-	chr10:61483723-61484493	Barretts	OAC	OK	52.6233	68.5712	0.381902	0.311608	0.5514	0.792605	no
chr10_61504410_61504911	chr10_61504410_61504911	-	chr10:61504409-61504911	Barretts	OAC	OK	36.7338	21.239	-0.790396	-0.793017	0.11955	0.405392	no
chr10_61508506_61509007	chr10_61508506_61509007	-	chr10:61508505-61509007	Barretts	OAC	OK	40.0123	23.65	-0.758602	-0.775982	0.1209	0.407352	no
chr10_6152473_6152974	chr10_6152473_6152974	-	chr10:6152472-6152974	Barretts	OAC	OK	14.2155	16.2777	0.195431	0.169316	0.73395	0.88754	no
chr10_61532899_61533400	chr10_61532899_61533400	-	chr10:61532898-61533400	Barretts	OAC	OK	26.4763	11.7859	-1.16764	-1.05081	0.04355	0.257241	no
chr10_61564769_61565270	chr10_61564769_61565270	-	chr10:61564768-61565270	Barretts	OAC	OK	34.8259	24.9722	-0.479837	-0.487821	0.31875	0.628432	no
chr10_61569056_61569557	chr10_61569056_61569557	-	chr10:61569055-61569557	Barretts	OAC	OK	49.413	57.4924	0.218483	0.245695	0.6246	0.831447	no
chr10_61591361_61591862	chr10_61591361_61591862	-	chr10:61591360-61591862	Barretts	OAC	OK	12.7507	9.56745	-0.414374	-0.338789	0.5175	0.771306	no
chr10_61593498_61593999	chr10_61593498_61593999	-	chr10:61593497-61593999	Barretts	OAC	OK	40.0282	26.9595	-0.570221	-0.558618	0.2552	0.56805	no
chr10_61603365_61603866	chr10_61603365_61603866	-	chr10:61603364-61603866	Barretts	OAC	OK	16.5279	7.16025	-1.20682	-0.922337	0.07125	0.31956	no
chr10_61612794_61613295	chr10_61612794_61613295	-	chr10:61612793-61613295	Barretts	OAC	OK	15.6315	7.26311	-1.1058	-0.865453	0.11135	0.393848	no
chr10_61613822_61614323	chr10_61613822_61614323	-	chr10:61613821-61614323	Barretts	OAC	OK	29.8477	12.4912	-1.25671	-1.16149	0.0267	0.206427	no
chr10_6161915_6162416	chr10_6161915_6162416	-	chr10:6161914-6162416	Barretts	OAC	OK	50.3341	42.0027	-0.261054	-0.287268	0.57245	0.80372	no
chr10_61624806_61625307	chr10_61624806_61625307	-	chr10:61624805-61625307	Barretts	OAC	OK	58.5211	70.603	0.270772	0.322854	0.5102	0.766941	no
chr10_6162523_6163024	chr10_6162523_6163024	-	chr10:6162522-6163024	Barretts	OAC	OK	27.4075	11.4925	-1.25388	-1.11099	0.0304	0.218852	no
chr10_61636467_61636968	chr10_61636467_61636968	-	chr10:61636466-61636968	Barretts	OAC	NOTEST	8.40394	4.95524	-0.76211	0	1	1	no
chr10_61653786_61654287	chr10_61653786_61654287	-	chr10:61653785-61654287	Barretts	OAC	OK	59.3313	48.023	-0.30507	-0.330849	0.5113	0.767203	no
chr10_61655351_61655852	chr10_61655351_61655852	-	chr10:61655350-61655852	Barretts	OAC	OK	99.5155	128.863	0.372842	0.490474	0.32505	0.633748	no
chr10_61660047_61660548	chr10_61660047_61660548	-	chr10:61660046-61660548	Barretts	OAC	OK	17.8126	22.2236	0.319199	0.284289	0.5719	0.803406	no
chr10_61666128_61666629	chr10_61666128_61666629	-	chr10:61666127-61666969	Barretts	OAC	OK	325.358	398.906	0.294022	0.462898	0.3579	0.660946	no
chr10_61666468_61666969	chr10_61666468_61666969	-	chr10:61666127-61666969	Barretts	OAC	OK	85.6447	99.4904	0.216194	0.154819	0.74565	0.892663	no
chr10_61668133_61668634	chr10_61668133_61668634	-	chr10:61668132-61668634	Barretts	OAC	OK	49.2248	76.6594	0.639077	0.733087	0.14525	0.439817	no
chr10_6167666_6168167	chr10_6167666_6168167	-	chr10:6167665-6168167	Barretts	OAC	OK	19.5185	6.41464	-1.6054	-1.18987	0.03155	0.222441	no
chr10_6182101_6182602	chr10_6182101_6182602	-	chr10:6182100-6182853	Barretts	OAC	OK	18.411	15.6262	-0.236601	-0.121835	0.8014	0.919115	no
chr10_6182352_6182853	chr10_6182352_6182853	-	chr10:6182100-6182853	Barretts	OAC	OK	36.6597	38.0061	0.052033	0.0454808	0.93085	0.973886	no
chr10_6186572_6187073	chr10_6186572_6187073	-	chr10:6186571-6187313	Barretts	OAC	OK	102.923	143.392	0.478397	0.56287	0.26845	0.581812	no
chr10_6186812_6187313	chr10_6186812_6187313	-	chr10:6186571-6187313	Barretts	OAC	OK	61.363	73.4959	0.260293	0.217044	0.66245	0.850333	no
chr10_6193295_6193796	chr10_6193295_6193796	-	chr10:6193294-6193796	Barretts	OAC	OK	58.9001	45.9241	-0.359017	-0.411597	0.40695	0.698035	no
chr10_6205466_6205967	chr10_6205466_6205967	-	chr10:6205465-6205967	Barretts	OAC	OK	182.022	324.111	0.832376	1.32876	0.0077	0.122714	no
chr10_6212458_6212959	chr10_6212458_6212959	-	chr10:6212457-6212959	Barretts	OAC	OK	36.5049	22.3282	-0.709225	-0.691459	0.1604	0.461112	no
chr10_62147267_62147768	chr10_62147267_62147768	-	chr10:62147266-62147768	Barretts	OAC	OK	56.7037	38.1405	-0.572118	-0.551699	0.24875	0.562174	no
chr10_62148644_62149145	chr10_62148644_62149145	-	chr10:62148643-62149145	Barretts	OAC	OK	36.0122	12.6652	-1.50762	-1.3769	0.013	0.151755	no
chr10_62152054_62152555	chr10_62152054_62152555	-	chr10:62152053-62152555	Barretts	OAC	OK	43.7479	76.9929	0.815511	0.93314	0.0702	0.317674	no
chr10_62174625_62175126	chr10_62174625_62175126	-	chr10:62174624-62175126	Barretts	OAC	OK	23.3311	12.978	-0.846183	-0.798152	0.1176	0.402029	no
chr10_62206543_62207044	chr10_62206543_62207044	-	chr10:62206542-62207044	Barretts	OAC	OK	24.3928	28.6709	0.23313	0.217135	0.66295	0.850599	no
chr10_6224296_6224797	chr10_6224296_6224797	-	chr10:6224295-6224797	Barretts	OAC	OK	29.6971	16.4862	-0.849063	-0.77754	0.11205	0.39468	no
chr10_6225157_6225658	chr10_6225157_6225658	-	chr10:6225156-6225658	Barretts	OAC	OK	14.6266	5.19452	-1.49353	-1.10541	0.0603	0.296159	no
chr10_62281723_62282224	chr10_62281723_62282224	-	chr10:62281722-62282224	Barretts	OAC	OK	12.8278	9.41205	-0.446688	-0.341259	0.48035	0.749004	no
chr10_62309415_62309916	chr10_62309415_62309916	-	chr10:62309414-62309916	Barretts	OAC	OK	34.224	36.7045	0.100949	0.108575	0.82805	0.930411	no
chr10_62315419_62315920	chr10_62315419_62315920	-	chr10:62315418-62316390	Barretts	OAC	OK	12.0424	12.7583	0.0833035	0.0547033	0.9148	0.966996	no
chr10_62315889_62316390	chr10_62315889_62316390	-	chr10:62315418-62316390	Barretts	OAC	NOTEST	8.86711	8.97613	0.0176294	0	1	1	no
chr10_62332162_62332663	chr10_62332162_62332663	-	chr10:62332161-62333048	Barretts	OAC	OK	47.207	39.1306	-0.270703	-0.258381	0.61145	0.825438	no
chr10_62332547_62333048	chr10_62332547_62333048	-	chr10:62332161-62333048	Barretts	OAC	OK	22.8899	13.1873	-0.795562	-0.468875	0.33725	0.643668	no
chr10_62370831_62371332	chr10_62370831_62371332	-	chr10:62370830-62371599	Barretts	OAC	OK	18.8339	6.96171	-1.43582	-0.579039	0.3557	0.65905	no
chr10_62370964_62371465	chr10_62370964_62371465	-	chr10:62370830-62371599	Barretts	OAC	OK	27.8149	30.9446	0.153831	0.0966341	0.8457	0.937298	no
chr10_62371098_62371599	chr10_62371098_62371599	-	chr10:62370830-62371599	Barretts	OAC	OK	46.6583	25.8764	-0.850496	-0.644719	0.2045	0.516284	no
chr10_62387472_62387973	chr10_62387472_62387973	-	chr10:62387471-62387973	Barretts	OAC	OK	28.079	22.1406	-0.342798	-0.329509	0.5028	0.762442	no
chr10_6243405_6243906	chr10_6243405_6243906	-	chr10:6243404-6243906	Barretts	OAC	OK	82.7106	124.289	0.587554	0.743549	0.1317	0.422873	no
chr10_6244569_6245070	chr10_6244569_6245070	-	chr10:6244568-6245715	Barretts	OAC	OK	157.886	288.434	0.869358	1.16783	0.02155	0.18765	no
chr10_6245044_6245545	chr10_6245044_6245545	-	chr10:6244568-6245715	Barretts	OAC	OK	59.1444	43.3555	-0.448028	-0.277235	0.6051	0.821409	no
chr10_6245214_6245715	chr10_6245214_6245715	-	chr10:6244568-6245715	Barretts	OAC	OK	44.4443	72.8601	0.71313	0.462848	0.3641	0.665373	no
chr10_62467541_62468042	chr10_62467541_62468042	-	chr10:62467540-62468042	Barretts	OAC	OK	16.5614	22.5809	0.447276	0.406561	0.4033	0.695233	no
chr10_62492367_62492868	chr10_62492367_62492868	-	chr10:62492366-62493530	Barretts	OAC	OK	46.7333	43.3635	-0.10797	-0.0585414	0.90465	0.96212	no
chr10_62492601_62493102	chr10_62492601_62493102	-	chr10:62492366-62493530	Barretts	OAC	OK	23.07	24.9186	0.111208	0.0457612	0.9326	0.97478	no
chr10_62492773_62493274	chr10_62492773_62493274	-	chr10:62492366-62493530	Barretts	OAC	OK	34.0572	36.5727	0.102807	0.0518925	0.9195	0.969304	no
chr10_62493029_62493530	chr10_62493029_62493530	-	chr10:62492366-62493530	Barretts	OAC	OK	127.483	176.057	0.465743	0.54232	0.292	0.603838	no
chr10_62513526_62514027	chr10_62513526_62514027	-	chr10:62513525-62514027	Barretts	OAC	OK	23.3826	33.2782	0.509141	0.489969	0.31075	0.621536	no
chr10_62517362_62517863	chr10_62517362_62517863	-	chr10:62517361-62517863	Barretts	OAC	OK	17.9538	26.4752	0.56035	0.521758	0.31035	0.621342	no
chr10_62528510_62529011	chr10_62528510_62529011	-	chr10:62528509-62529011	Barretts	OAC	OK	28.9419	27.9433	-0.0506587	-0.0535161	0.9114	0.965436	no
chr10_62537852_62538353	chr10_62537852_62538353	-	chr10:62537851-62538754	Barretts	OAC	OK	333.128	406.662	0.287754	0.491519	0.3265	0.635072	no
chr10_62538253_62538754	chr10_62538253_62538754	-	chr10:62537851-62538754	Barretts	OAC	OK	35.8614	56.6613	0.659934	0.350006	0.51705	0.77108	no
chr10_62576262_62576763	chr10_62576262_62576763	-	chr10:62576261-62576763	Barretts	OAC	OK	36.3924	27.0048	-0.430422	-0.443808	0.36495	0.665809	no
chr10_62630043_62630544	chr10_62630043_62630544	-	chr10:62630042-62630544	Barretts	OAC	OK	18.2352	12.4381	-0.551953	-0.457252	0.35975	0.662662	no
chr10_6264223_6264724	chr10_6264223_6264724	-	chr10:6264222-6264724	Barretts	OAC	OK	25.3582	9.872	-1.36104	-1.13789	0.0333	0.228172	no
chr10_62642775_62643276	chr10_62642775_62643276	-	chr10:62642774-62643276	Barretts	OAC	OK	30.9604	25.2409	-0.294662	-0.299859	0.5458	0.789083	no
chr10_62668626_62669127	chr10_62668626_62669127	-	chr10:62668625-62669127	Barretts	OAC	OK	13.1691	7.2235	-0.866391	-0.607284	0.2063	0.518497	no
chr10_62670127_62670628	chr10_62670127_62670628	-	chr10:62670126-62670628	Barretts	OAC	OK	34.9791	33.0133	-0.0834484	-0.0827883	0.85555	0.941532	no
chr10_62703017_62703518	chr10_62703017_62703518	-	chr10:62703016-62704771	Barretts	OAC	OK	34.277	50.2767	0.552651	0.296595	0.5851	0.810339	no
chr10_62703235_62703736	chr10_62703235_62703736	-	chr10:62703016-62704771	Barretts	OAC	OK	30.969	42.2466	0.448008	0.21822	0.68725	0.863079	no
chr10_62703448_62703949	chr10_62703448_62703949	-	chr10:62703016-62704771	Barretts	OAC	OK	30.9416	52.2758	0.756595	0.358615	0.57585	0.805176	no
chr10_62703768_62704269	chr10_62703768_62704269	-	chr10:62703016-62704771	Barretts	OAC	OK	97.7748	155.71	0.671326	0.605701	0.2196	0.531405	no
chr10_62704035_62704536	chr10_62704035_62704536	-	chr10:62703016-62704771	Barretts	OAC	OK	40.965	46.9821	0.197722	0.107362	0.837	0.934492	no
chr10_62704270_62704771	chr10_62704270_62704771	-	chr10:62703016-62704771	Barretts	OAC	OK	53.5068	67.2315	0.329416	0.218011	0.6635	0.850897	no
chr10_62715621_62716122	chr10_62715621_62716122	-	chr10:62715620-62716362	Barretts	OAC	OK	35.4317	39.0826	0.141487	0.0936197	0.85845	0.942906	no
chr10_62715861_62716362	chr10_62715861_62716362	-	chr10:62715620-62716362	Barretts	OAC	OK	34.9298	69.3792	0.990045	0.701391	0.1449	0.439177	no
chr10_62723837_62724338	chr10_62723837_62724338	-	chr10:62723836-62724338	Barretts	OAC	OK	52.5776	33.8582	-0.634944	-0.688202	0.164	0.465732	no
chr10_62737371_62737872	chr10_62737371_62737872	-	chr10:62737370-62737872	Barretts	OAC	OK	40.4957	43.3356	0.0977843	0.106857	0.82925	0.930824	no
chr10_62738468_62738969	chr10_62738468_62738969	-	chr10:62738467-62738969	Barretts	OAC	OK	33.7983	38.9336	0.204066	0.214866	0.6642	0.851136	no
chr10_62749091_62749592	chr10_62749091_62749592	-	chr10:62749090-62749810	Barretts	OAC	OK	114.802	117.71	0.0360886	0.0409212	0.9392	0.977986	no
chr10_62749309_62749810	chr10_62749309_62749810	-	chr10:62749090-62749810	Barretts	OAC	OK	38.6282	78.5959	1.0248	0.707065	0.1563	0.455759	no
chr10_62758587_62759088	chr10_62758587_62759088	-	chr10:62758586-62759088	Barretts	OAC	OK	43.9434	46.5299	0.0825131	0.0882503	0.86635	0.945973	no
chr10_62760661_62761162	chr10_62760661_62761162	-	chr10:62760660-62761817	Barretts	OAC	OK	56.7112	63.1179	0.154416	0.107402	0.8292	0.930824	no
chr10_62761048_62761549	chr10_62761048_62761549	-	chr10:62760660-62761817	Barretts	OAC	OK	62.4113	88.9008	0.51039	0.408649	0.4473	0.726649	no
chr10_62761316_62761817	chr10_62761316_62761817	-	chr10:62760660-62761817	Barretts	OAC	OK	33.499	47.5161	0.504297	0.30951	0.55125	0.79252	no
chr10_62780450_62780951	chr10_62780450_62780951	-	chr10:62780449-62780951	Barretts	OAC	OK	28.2625	16.7054	-0.758572	-0.67911	0.1761	0.481785	no
chr10_6281121_6281622	chr10_6281121_6281622	-	chr10:6281120-6281622	Barretts	OAC	OK	25.8356	45.4501	0.81492	0.833692	0.1033	0.380228	no
chr10_6297412_6297913	chr10_6297412_6297913	-	chr10:6297411-6298122	Barretts	OAC	OK	14.3566	23.3356	0.700814	0.419731	0.42415	0.710973	no
chr10_6297621_6298122	chr10_6297621_6298122	-	chr10:6297411-6298122	Barretts	OAC	OK	28.355	19.9547	-0.506876	-0.337451	0.4839	0.751075	no
chr10_6298265_6298766	chr10_6298265_6298766	-	chr10:6298264-6298766	Barretts	OAC	OK	21.0154	19.3066	-0.122354	-0.118625	0.8038	0.920539	no
chr10_6308966_6309467	chr10_6308966_6309467	-	chr10:6308965-6309607	Barretts	OAC	OK	15.3215	16.5028	0.107148	0.0528331	0.92025	0.96959	no
chr10_6309106_6309607	chr10_6309106_6309607	-	chr10:6308965-6309607	Barretts	OAC	OK	48.1383	57.8034	0.263969	0.269051	0.58815	0.812049	no
chr10_6317123_6317624	chr10_6317123_6317624	-	chr10:6317122-6317624	Barretts	OAC	OK	111.633	250.434	1.16566	1.68235	0.0011	0.0496812	yes
chr10_6321367_6321868	chr10_6321367_6321868	-	chr10:6321366-6321868	Barretts	OAC	OK	31.8535	102.572	1.68711	1.94496	0.00035	0.0260979	yes
chr10_6329276_6329777	chr10_6329276_6329777	-	chr10:6329275-6329777	Barretts	OAC	OK	79.8038	99.1905	0.313745	0.389503	0.43865	0.721422	no
chr10_6333205_6333706	chr10_6333205_6333706	-	chr10:6333204-6333706	Barretts	OAC	OK	30.5749	39.1991	0.358476	0.378862	0.4541	0.730715	no
chr10_6338859_6339360	chr10_6338859_6339360	-	chr10:6338858-6339360	Barretts	OAC	OK	25.6073	50.7933	0.988083	1.0469	0.0402	0.248508	no
chr10_6339992_6340493	chr10_6339992_6340493	-	chr10:6339991-6340493	Barretts	OAC	OK	37.2211	78.2707	1.07235	1.16631	0.023	0.193549	no
chr10_6341176_6341677	chr10_6341176_6341677	-	chr10:6341175-6341677	Barretts	OAC	OK	70.3755	160.57	1.19006	1.58097	0.0017	0.0617283	no
chr10_64133854_64134355	chr10_64133854_64134355	-	chr10:64133853-64134355	Barretts	OAC	OK	45.1397	27.9895	-0.689512	-0.688946	0.16715	0.469584	no
chr10_64143736_64144237	chr10_64143736_64144237	-	chr10:64143735-64144237	Barretts	OAC	OK	35.1459	35.6496	0.0205293	0.0218798	0.9725	0.986525	no
chr10_64214321_64214822	chr10_64214321_64214822	-	chr10:64214320-64214822	Barretts	OAC	OK	42.6901	22.6837	-0.912244	-0.87417	0.08205	0.343036	no
chr10_64251736_64252237	chr10_64251736_64252237	-	chr10:64251735-64252237	Barretts	OAC	OK	33.4729	20.1669	-0.731005	-0.691539	0.16805	0.470935	no
chr10_64323840_64324341	chr10_64323840_64324341	-	chr10:64323839-64324341	Barretts	OAC	OK	24.749	10.0279	-1.30335	-1.11195	0.03535	0.234379	no
chr10_64353716_64354217	chr10_64353716_64354217	-	chr10:64353715-64354451	Barretts	OAC	OK	82.2081	42.4789	-0.952534	-1.00334	0.04445	0.25862	no
chr10_64353950_64354451	chr10_64353950_64354451	-	chr10:64353715-64354451	Barretts	OAC	OK	15.4323	8.06227	-0.936693	-0.36965	0.54005	0.785597	no
chr10_64370363_64370864	chr10_64370363_64370864	-	chr10:64370362-64370864	Barretts	OAC	OK	46.3254	26.1494	-0.825028	-0.8569	0.0815	0.342009	no
chr10_64378657_64379158	chr10_64378657_64379158	-	chr10:64378656-64379158	Barretts	OAC	OK	30.5875	12.3636	-1.30685	-1.16443	0.0251	0.200466	no
chr10_64387549_64388050	chr10_64387549_64388050	-	chr10:64387548-64388050	Barretts	OAC	NOTEST	10.2851	9.27401	-0.149285	0	1	1	no
chr10_64392196_64392697	chr10_64392196_64392697	-	chr10:64392195-64392697	Barretts	OAC	OK	25.3884	22.4459	-0.177716	-0.170069	0.73655	0.888463	no
chr10_64397068_64397569	chr10_64397068_64397569	-	chr10:64397067-64397569	Barretts	OAC	OK	46.6032	44.0621	-0.080888	-0.0874144	0.85925	0.943249	no
chr10_64409527_64410028	chr10_64409527_64410028	-	chr10:64409526-64410028	Barretts	OAC	OK	20.0855	12.1526	-0.724891	-0.635374	0.20785	0.520178	no
chr10_64417472_64417973	chr10_64417472_64417973	-	chr10:64417471-64417973	Barretts	OAC	OK	25.9594	29.4284	0.180952	0.182003	0.70695	0.873175	no
chr10_64441146_64441647	chr10_64441146_64441647	-	chr10:64441145-64441647	Barretts	OAC	OK	37.9228	20.7224	-0.871873	-0.891678	0.0735	0.324346	no
chr10_64504908_64505409	chr10_64504908_64505409	-	chr10:64504907-64505409	Barretts	OAC	OK	28.9164	20.1839	-0.518681	-0.507009	0.30155	0.612743	no
chr10_64525395_64525896	chr10_64525395_64525896	-	chr10:64525394-64525896	Barretts	OAC	OK	12.1911	9.79328	-0.31596	-0.26555	0.5996	0.817929	no
chr10_64526118_64526619	chr10_64526118_64526619	-	chr10:64526117-64526619	Barretts	OAC	OK	23.71	36.6157	0.626965	0.607474	0.21545	0.527792	no
chr10_69983290_69983791	chr10_69983290_69983791	-	chr10:69983289-69983791	Barretts	OAC	OK	27.9745	23.4168	-0.256569	-0.260932	0.599	0.81764	no
chr10_69990766_69991267	chr10_69990766_69991267	-	chr10:69990765-69991544	Barretts	OAC	OK	43.3325	47.81	0.141865	0.102041	0.82815	0.930433	no
chr10_69991043_69991544	chr10_69991043_69991544	-	chr10:69990765-69991544	Barretts	OAC	OK	67.6907	83.6487	0.305386	0.312233	0.5487	0.790649	no
chr10_70061901_70062402	chr10_70061901_70062402	-	chr10:70061900-70062402	Barretts	OAC	OK	46.7806	38.4293	-0.283706	-0.303529	0.54125	0.786292	no
chr10_70063479_70063980	chr10_70063479_70063980	-	chr10:70063478-70063980	Barretts	OAC	OK	21.2304	24.4725	0.205033	0.201917	0.6791	0.859101	no
chr10_70074620_70075121	chr10_70074620_70075121	-	chr10:70074619-70075260	Barretts	OAC	OK	31.246	19.5131	-0.679229	-0.305044	0.51235	0.76772	no
chr10_70074759_70075260	chr10_70074759_70075260	-	chr10:70074619-70075260	Barretts	OAC	OK	37.7799	35.6977	-0.0817845	-0.053144	0.92045	0.969625	no
chr10_70075276_70075777	chr10_70075276_70075777	-	chr10:70075275-70075777	Barretts	OAC	OK	16.9041	19.7735	0.226192	0.208607	0.66965	0.854003	no
chr10_70078364_70078865	chr10_70078364_70078865	-	chr10:70078363-70078865	Barretts	OAC	OK	6.54809	17.2011	1.39335	1.09936	0.0514	0.276596	no
chr10_70078915_70079416	chr10_70078915_70079416	-	chr10:70078914-70079416	Barretts	OAC	OK	37.7115	40.201	0.0922281	0.100527	0.83625	0.934288	no
chr10_70090479_70090980	chr10_70090479_70090980	-	chr10:70090478-70090980	Barretts	OAC	OK	27.6686	49.3058	0.83351	0.843135	0.08895	0.354879	no
chr10_70091176_70091677	chr10_70091176_70091677	-	chr10:70091175-70092306	Barretts	OAC	OK	85.4709	127.291	0.574627	0.482142	0.33835	0.644425	no
chr10_70091416_70091917	chr10_70091416_70091917	-	chr10:70091175-70092306	Barretts	OAC	OK	123.772	224.583	0.859558	0.914024	0.0684	0.31404	no
chr10_70091561_70092062	chr10_70091561_70092062	-	chr10:70091175-70092306	Barretts	OAC	OK	65.9247	105.118	0.673116	0.479944	0.3542	0.657495	no
chr10_70091805_70092306	chr10_70091805_70092306	-	chr10:70091175-70092306	Barretts	OAC	OK	59.3685	86.7471	0.547119	0.34893	0.5279	0.778294	no
chr10_70108132_70108633	chr10_70108132_70108633	-	chr10:70108131-70108633	Barretts	OAC	OK	32.3194	14.463	-1.16003	-1.09265	0.02925	0.215337	no
chr10_70166062_70166563	chr10_70166062_70166563	-	chr10:70166061-70167296	Barretts	OAC	OK	40.2041	39.1352	-0.038876	-0.0234976	0.96055	0.98441	no
chr10_70166436_70166937	chr10_70166436_70166937	-	chr10:70166061-70167296	Barretts	OAC	OK	57.472	50.2498	-0.193743	-0.134717	0.78065	0.908792	no
chr10_70166795_70167296	chr10_70166795_70167296	-	chr10:70166061-70167296	Barretts	OAC	OK	127.582	143.715	0.171778	0.20195	0.69025	0.864601	no
chr10_70231261_70231762	chr10_70231261_70231762	-	chr10:70231260-70232021	Barretts	OAC	OK	49.6422	51.1303	0.0426098	0.0369081	0.9414	0.978696	no
chr10_70231520_70232021	chr10_70231520_70232021	-	chr10:70231260-70232021	Barretts	OAC	OK	75.0241	50.4342	-0.572952	-0.556735	0.26905	0.582315	no
chr10_70286655_70287156	chr10_70286655_70287156	-	chr10:70286654-70287602	Barretts	OAC	OK	44.0101	71.8977	0.708113	0.401518	0.4281	0.713985	no
chr10_70287101_70287602	chr10_70287101_70287602	-	chr10:70286654-70287602	Barretts	OAC	OK	249.746	348.97	0.482645	0.752745	0.13605	0.427884	no
chr10_70310450_70310951	chr10_70310450_70310951	-	chr10:70310449-70310951	Barretts	OAC	OK	45.8447	28.3	-0.695954	-0.755998	0.13455	0.425859	no
chr10_70314743_70315244	chr10_70314743_70315244	-	chr10:70314742-70315244	Barretts	OAC	OK	23.5949	44.9413	0.929566	0.905162	0.0764	0.331597	no
chr10_70319851_70320352	chr10_70319851_70320352	-	chr10:70319850-70320805	Barretts	OAC	OK	50.3242	34.8701	-0.529265	-0.451024	0.36345	0.665101	no
chr10_70320304_70320805	chr10_70320304_70320805	-	chr10:70319850-70320805	Barretts	OAC	OK	50.6991	21.0193	-1.27025	-0.902814	0.131	0.421792	no
chr10_70359089_70359590	chr10_70359089_70359590	-	chr10:70359088-70359590	Barretts	OAC	OK	41.1363	33.9737	-0.275995	-0.279621	0.5638	0.799283	no
chr10_70359971_70360472	chr10_70359971_70360472	-	chr10:70359970-70360472	Barretts	OAC	OK	99.0591	72.8477	-0.443406	-0.539927	0.254	0.566901	no
chr10_70377291_70377792	chr10_70377291_70377792	-	chr10:70377290-70377792	Barretts	OAC	OK	25.1548	24.1593	-0.0582574	-0.05567	0.90515	0.962416	no
chr10_70480623_70481124	chr10_70480623_70481124	-	chr10:70480622-70481466	Barretts	OAC	OK	252.406	378.952	0.586269	0.945101	0.05905	0.293329	no
chr10_70480965_70481466	chr10_70480965_70481466	-	chr10:70480622-70481466	Barretts	OAC	OK	44.9937	68.9279	0.615366	0.368691	0.4634	0.736457	no
chr10_70565091_70565592	chr10_70565091_70565592	-	chr10:70565090-70565592	Barretts	OAC	OK	26.6852	44.8256	0.748284	0.784982	0.12205	0.408509	no
chr10_70586746_70587247	chr10_70586746_70587247	-	chr10:70586745-70587472	Barretts	OAC	OK	30.8919	37.7631	0.289749	0.194242	0.7035	0.872099	no
chr10_70586971_70587472	chr10_70586971_70587472	-	chr10:70586745-70587472	Barretts	OAC	OK	37.7517	50.4738	0.418996	0.325902	0.52025	0.772939	no
chr10_70587884_70588385	chr10_70587884_70588385	-	chr10:70587883-70588385	Barretts	OAC	OK	35.0053	20.7822	-0.752228	-0.763332	0.1182	0.40317	no
chr10_70631620_70632121	chr10_70631620_70632121	-	chr10:70631619-70632121	Barretts	OAC	NOTEST	11.3736	7.19936	-0.659751	0	1	1	no
chr10_70636242_70636743	chr10_70636242_70636743	-	chr10:70636241-70636743	Barretts	OAC	OK	31.265	25.9808	-0.267102	-0.264169	0.6037	0.820532	no
chr10_70638127_70638628	chr10_70638127_70638628	-	chr10:70638126-70638628	Barretts	OAC	OK	17.5093	31.7399	0.858171	0.691622	0.17325	0.477968	no
chr10_70660388_70660889	chr10_70660388_70660889	-	chr10:70660387-70661642	Barretts	OAC	OK	43.9506	90.2779	1.03849	0.643027	0.19905	0.509693	no
chr10_70660695_70661196	chr10_70660695_70661196	-	chr10:70660387-70661642	Barretts	OAC	OK	259.569	373.469	0.524867	0.823713	0.10265	0.378837	no
chr10_70661141_70661642	chr10_70661141_70661642	-	chr10:70660387-70661642	Barretts	OAC	OK	44.8773	65.4803	0.545075	0.325849	0.52395	0.775755	no
chr10_70715650_70716151	chr10_70715650_70716151	-	chr10:70715649-70716630	Barretts	OAC	OK	68.7319	129.831	0.917584	0.919832	0.06605	0.308807	no
chr10_70715897_70716398	chr10_70715897_70716398	-	chr10:70715649-70716630	Barretts	OAC	OK	35.2559	53.0385	0.589175	0.337462	0.5367	0.784171	no
chr10_70716129_70716630	chr10_70716129_70716630	-	chr10:70715649-70716630	Barretts	OAC	OK	49.6762	106.109	1.09493	0.953165	0.06005	0.295765	no
chr10_70748238_70748739	chr10_70748238_70748739	-	chr10:70748237-70749237	Barretts	OAC	OK	172.32	211.425	0.29505	0.39603	0.42595	0.712105	no
chr10_70748574_70749075	chr10_70748574_70749075	-	chr10:70748237-70749237	Barretts	OAC	OK	64.4734	60.1155	-0.100967	-0.0693493	0.8968	0.958425	no
chr10_70748736_70749237	chr10_70748736_70749237	-	chr10:70748237-70749237	Barretts	OAC	OK	37.2088	40.6915	0.129081	0.066345	0.89625	0.958102	no
chr10_70821310_70821811	chr10_70821310_70821811	-	chr10:70821309-70822056	Barretts	OAC	OK	52.7279	50.5137	-0.0618918	-0.0582451	0.90955	0.964621	no
chr10_70821555_70822056	chr10_70821555_70822056	-	chr10:70821309-70822056	Barretts	OAC	OK	26.2095	23.592	-0.151795	-0.0880442	0.8655	0.945668	no
chr10_70845828_70846329	chr10_70845828_70846329	-	chr10:70845827-70846329	Barretts	OAC	OK	16.8225	30.9783	0.880867	0.843438	0.10025	0.375245	no
chr10_70853006_70853507	chr10_70853006_70853507	-	chr10:70853005-70853507	Barretts	OAC	OK	35.7531	38.3782	0.102221	0.109791	0.82335	0.928395	no
chr10_70882987_70883488	chr10_70882987_70883488	-	chr10:70882986-70883488	Barretts	OAC	OK	49.3508	80.0735	0.698251	0.836805	0.09165	0.359234	no
chr10_70883579_70884080	chr10_70883579_70884080	-	chr10:70883578-70884441	Barretts	OAC	OK	312.282	592.706	0.924466	1.54758	0.0024	0.0719835	no
chr10_70883940_70884441	chr10_70883940_70884441	-	chr10:70883578-70884441	Barretts	OAC	OK	62.9189	118.553	0.913969	0.593244	0.2379	0.550991	no
chr10_70939153_70939654	chr10_70939153_70939654	-	chr10:70939152-70940750	Barretts	OAC	OK	20.4829	31.6444	0.627532	0.307218	0.6423	0.840204	no
chr10_70939452_70939953	chr10_70939452_70939953	-	chr10:70939152-70940750	Barretts	OAC	OK	59.3898	82.933	0.481732	0.385903	0.43885	0.721473	no
chr10_70939745_70940246	chr10_70939745_70940246	-	chr10:70939152-70940750	Barretts	OAC	OK	75.0307	88.1892	0.233122	0.199598	0.71645	0.877933	no
chr10_70940015_70940516	chr10_70940015_70940516	-	chr10:70939152-70940750	Barretts	OAC	OK	17.1339	26.5926	0.634177	0.253702	0.61105	0.825208	no
chr10_70940249_70940750	chr10_70940249_70940750	-	chr10:70939152-70940750	Barretts	OAC	OK	12.869	24.8116	0.94711	0.342539	0.57295	0.80413	no
chr10_70976868_70977369	chr10_70976868_70977369	-	chr10:70976867-70977369	Barretts	OAC	OK	44.7811	76.0818	0.764663	0.890759	0.0798	0.338712	no
chr10_70979823_70980324	chr10_70979823_70980324	-	chr10:70979822-70980324	Barretts	OAC	OK	37.8346	61.9262	0.710844	0.814895	0.09905	0.372878	no
chr10_70982317_70982818	chr10_70982317_70982818	-	chr10:70982316-70982818	Barretts	OAC	OK	74.5076	182.622	1.2934	1.71906	0.0009	0.0437096	yes
chr10_70989066_70989567	chr10_70989066_70989567	-	chr10:70989065-70989567	Barretts	OAC	OK	101.181	207.583	1.03675	1.46459	0.00325	0.0836449	no
chr10_70992003_70992504	chr10_70992003_70992504	-	chr10:70992002-70992504	Barretts	OAC	OK	34.7329	47.5809	0.454078	0.477422	0.3431	0.649105	no
chr10_70997268_70997769	chr10_70997268_70997769	-	chr10:70997267-70997769	Barretts	OAC	OK	55.2188	36.8244	-0.584498	-0.64329	0.212	0.524495	no
chr10_71025303_71025804	chr10_71025303_71025804	-	chr10:71025302-71025804	Barretts	OAC	OK	27.5621	14.2952	-0.947153	-0.906193	0.0746	0.327087	no
chr10_71076948_71077449	chr10_71076948_71077449	-	chr10:71076947-71078757	Barretts	OAC	OK	36.486	56.2046	0.623346	0.29733	0.60555	0.8218	no
chr10_71077212_71077713	chr10_71077212_71077713	-	chr10:71076947-71078757	Barretts	OAC	OK	15.7992	40.9132	1.37272	0.541599	0.5016	0.76184	no
chr10_71077440_71077941	chr10_71077440_71077941	-	chr10:71076947-71078757	Barretts	OAC	OK	38.749	43.2682	0.159146	0.0646654	0.9044	0.961971	no
chr10_71077562_71078063	chr10_71077562_71078063	-	chr10:71076947-71078757	Barretts	OAC	OK	28.7907	64.7435	1.16913	0.528733	0.3262	0.63479	no
chr10_71077827_71078328	chr10_71077827_71078328	-	chr10:71076947-71078757	Barretts	OAC	OK	61.6874	55.9837	-0.139971	-0.070998	0.9016	0.960754	no
chr10_71077959_71078460	chr10_71077959_71078460	-	chr10:71076947-71078757	Barretts	OAC	OK	16.2342	51.4748	1.66483	0.673317	0.3468	0.652419	no
chr10_71078256_71078757	chr10_71078256_71078757	-	chr10:71076947-71078757	Barretts	OAC	OK	205.919	290.69	0.497408	0.574273	0.2539	0.566901	no
chr10_71079022_71079523	chr10_71079022_71079523	-	chr10:71079021-71079523	Barretts	OAC	OK	59.6051	67.9252	0.188512	0.221637	0.657	0.848121	no
chr10_71087684_71088185	chr10_71087684_71088185	-	chr10:71087683-71088185	Barretts	OAC	OK	61.7755	84.7507	0.456191	0.539877	0.27115	0.584028	no
chr10_71092929_71093430	chr10_71092929_71093430	-	chr10:71092928-71093430	Barretts	OAC	OK	24.9037	25.7114	0.0460511	0.043844	0.92215	0.970241	no
chr10_71094134_71094635	chr10_71094134_71094635	-	chr10:71094133-71094635	Barretts	OAC	OK	46.6101	38.7244	-0.267399	-0.279534	0.5614	0.79828	no
chr10_73599777_73600278	chr10_73599777_73600278	-	chr10:73599776-73600649	Barretts	OAC	OK	19.3758	11.2532	-0.78392	-0.479121	0.3895	0.683834	no
chr10_73600148_73600649	chr10_73600148_73600649	-	chr10:73599776-73600649	Barretts	OAC	OK	13.7242	18.4882	0.429889	0.270031	0.57105	0.803082	no
chr10_73610306_73610807	chr10_73610306_73610807	-	chr10:73610305-73610807	Barretts	OAC	OK	25.4521	56.25	1.14407	1.19972	0.01875	0.177277	no
chr10_73610860_73611361	chr10_73610860_73611361	-	chr10:73610859-73611361	Barretts	OAC	OK	228.402	333.014	0.544006	0.913844	0.0695	0.316191	no
chr10_73620102_73620603	chr10_73620102_73620603	-	chr10:73620101-73620603	Barretts	OAC	OK	59.0059	101.885	0.788009	0.967029	0.0554	0.286137	no
chr10_73625526_73626027	chr10_73625526_73626027	-	chr10:73625525-73626027	Barretts	OAC	OK	20.8621	26.6983	0.355863	0.340655	0.493	0.757434	no
chr10_73631004_73631505	chr10_73631004_73631505	-	chr10:73631003-73631505	Barretts	OAC	OK	86.0292	141.318	0.71605	0.961507	0.0572	0.289972	no
chr10_73633500_73634001	chr10_73633500_73634001	-	chr10:73633499-73634001	Barretts	OAC	OK	34.5186	33.8595	-0.0278131	-0.0283434	0.96565	0.986075	no
chr10_73634411_73634912	chr10_73634411_73634912	-	chr10:73634410-73634912	Barretts	OAC	OK	39.519	62.7934	0.668068	0.757514	0.12825	0.417454	no
chr10_73637516_73638017	chr10_73637516_73638017	-	chr10:73637515-73638017	Barretts	OAC	OK	17.6788	18.474	0.0634725	0.0564359	0.9112	0.9654	no
chr10_73648357_73648858	chr10_73648357_73648858	-	chr10:73648356-73649112	Barretts	OAC	OK	52.3958	66.5193	0.344322	0.317275	0.54065	0.786043	no
chr10_73648611_73649112	chr10_73648611_73649112	-	chr10:73648356-73649112	Barretts	OAC	OK	35.7984	40.1026	0.163802	0.109941	0.8219	0.927812	no
chr10_73653572_73654073	chr10_73653572_73654073	-	chr10:73653571-73654073	Barretts	OAC	OK	24.4899	17.0242	-0.524604	-0.496928	0.32305	0.63198	no
chr10_73656106_73656607	chr10_73656106_73656607	-	chr10:73656105-73656607	Barretts	OAC	OK	49.5542	55.2679	0.157434	0.179987	0.7106	0.875197	no
chr10_73664420_73664921	chr10_73664420_73664921	-	chr10:73664419-73664921	Barretts	OAC	OK	22.7018	20.0588	-0.178571	-0.169916	0.72655	0.883346	no
chr10_73675610_73676111	chr10_73675610_73676111	-	chr10:73675609-73676111	Barretts	OAC	OK	23.4857	16.3963	-0.518415	-0.492095	0.316	0.626051	no
chr10_73682906_73683407	chr10_73682906_73683407	-	chr10:73682905-73683407	Barretts	OAC	OK	15.7821	12.009	-0.394175	-0.325567	0.50765	0.765553	no
chr10_73687371_73687872	chr10_73687371_73687872	-	chr10:73687370-73687872	Barretts	OAC	OK	20.1571	6.91381	-1.54374	-1.21756	0.0299	0.217592	no
chr10_73723987_73724488	chr10_73723987_73724488	-	chr10:73723986-73725337	Barretts	OAC	OK	56.5389	40.4295	-0.483836	-0.379409	0.44005	0.721986	no
chr10_73724428_73724929	chr10_73724428_73724929	-	chr10:73723986-73725337	Barretts	OAC	OK	33.9816	25.4139	-0.419138	-0.24948	0.6348	0.837057	no
chr10_73724836_73725337	chr10_73724836_73725337	-	chr10:73723986-73725337	Barretts	OAC	OK	38.6367	37.3669	-0.0482082	-0.0357038	0.9446	0.979612	no
chr10_73735291_73735792	chr10_73735291_73735792	-	chr10:73735290-73736289	Barretts	OAC	OK	41.6605	32.8054	-0.344749	-0.274688	0.57735	0.806119	no
chr10_73735788_73736289	chr10_73735788_73736289	-	chr10:73735290-73736289	Barretts	OAC	OK	37.5675	46.1978	0.29834	0.249943	0.6239	0.831122	no
chr10_73758243_73758744	chr10_73758243_73758744	-	chr10:73758242-73759035	Barretts	OAC	OK	29.9598	12.2807	-1.28663	-0.77273	0.15535	0.454664	no
chr10_73758534_73759035	chr10_73758534_73759035	-	chr10:73758242-73759035	Barretts	OAC	OK	48.0424	26.1431	-0.877878	-0.768624	0.12465	0.412014	no
chr10_73786415_73786916	chr10_73786415_73786916	-	chr10:73786414-73786916	Barretts	OAC	OK	34.9987	17.0311	-1.03913	-1.0213	0.04665	0.264827	no
chr10_73787784_73788285	chr10_73787784_73788285	-	chr10:73787783-73788285	Barretts	OAC	OK	31.9245	26.3069	-0.279224	-0.279132	0.586	0.810876	no
chr10_73804002_73804503	chr10_73804002_73804503	-	chr10:73804001-73804940	Barretts	OAC	OK	18.2473	4.76642	-1.93671	-0.645005	0.3143	0.624361	no
chr10_73804157_73804658	chr10_73804157_73804658	-	chr10:73804001-73804940	Barretts	OAC	OK	24.2169	31.9488	0.399747	0.248195	0.5795	0.807206	no
chr10_73804439_73804940	chr10_73804439_73804940	-	chr10:73804001-73804940	Barretts	OAC	OK	33.4426	11.1981	-1.57843	-0.925883	0.1508	0.448204	no
chr10_73808237_73808738	chr10_73808237_73808738	-	chr10:73808236-73808738	Barretts	OAC	OK	76.7912	74.8345	-0.0372373	-0.0462913	0.9271	0.972365	no
chr10_73816700_73817201	chr10_73816700_73817201	-	chr10:73816699-73817201	Barretts	OAC	OK	41.5019	29.5568	-0.489686	-0.499821	0.3225	0.631526	no
chr10_73840436_73840937	chr10_73840436_73840937	-	chr10:73840435-73840937	Barretts	OAC	OK	39.221	24.5206	-0.677634	-0.679042	0.1672	0.469611	no
chr10_73841717_73842218	chr10_73841717_73842218	-	chr10:73841716-73842218	Barretts	OAC	OK	54.114	62.9671	0.218595	0.25191	0.61425	0.826548	no
chr10_73847161_73847662	chr10_73847161_73847662	-	chr10:73847160-73847662	Barretts	OAC	OK	54.412	38.1453	-0.512421	-0.541452	0.2621	0.575463	no
chr10_73849369_73849870	chr10_73849369_73849870	-	chr10:73849368-73849870	Barretts	OAC	OK	23.9691	20.0486	-0.257672	-0.250969	0.60905	0.824137	no
chr10_73857327_73857828	chr10_73857327_73857828	-	chr10:73857326-73858815	Barretts	OAC	OK	41.8207	85.1043	1.02501	0.553937	0.31015	0.621256	no
chr10_73857466_73857967	chr10_73857466_73857967	-	chr10:73857326-73858815	Barretts	OAC	OK	102.844	151.577	0.559592	0.507567	0.30685	0.618567	no
chr10_73857726_73858227	chr10_73857726_73858227	-	chr10:73857326-73858815	Barretts	OAC	OK	23.7809	31.2482	0.393973	0.174723	0.7888	0.913121	no
chr10_73858057_73858558	chr10_73858057_73858558	-	chr10:73857326-73858815	Barretts	OAC	OK	28.9578	30.652	0.082026	0.0356834	0.95165	0.981744	no
chr10_73858188_73858689	chr10_73858188_73858689	-	chr10:73857326-73858815	Barretts	OAC	OK	20.3494	68.3857	1.74871	0.684669	0.28035	0.591476	no
chr10_73858314_73858815	chr10_73858314_73858815	-	chr10:73857326-73858815	Barretts	OAC	OK	66.266	69.5386	0.0695438	0.0478529	0.92095	0.969764	no
chr10_73858991_73859492	chr10_73858991_73859492	-	chr10:73858990-73859492	Barretts	OAC	OK	26.0257	39.4033	0.598379	0.603302	0.2132	0.525559	no
chr10_73894811_73895312	chr10_73894811_73895312	-	chr10:73894810-73895641	Barretts	OAC	OK	19.9361	12.2215	-0.70596	-0.387595	0.32065	0.63001	no
chr10_73895140_73895641	chr10_73895140_73895641	-	chr10:73894810-73895641	Barretts	OAC	OK	16.3727	7.80487	-1.06884	-0.588556	0.38505	0.680378	no
chr10_73930038_73930539	chr10_73930038_73930539	-	chr10:73930037-73930539	Barretts	OAC	OK	37.2099	57.4984	0.627836	0.701395	0.165	0.466783	no
chr10_73930836_73931337	chr10_73930836_73931337	-	chr10:73930835-73931337	Barretts	OAC	OK	48.5984	83.3702	0.778625	0.917815	0.0603	0.296159	no
chr10_73946317_73946818	chr10_73946317_73946818	-	chr10:73946316-73946818	Barretts	OAC	OK	24.6747	18.7368	-0.397158	-0.351429	0.47655	0.746354	no
chr10_73975527_73976028	chr10_73975527_73976028	-	chr10:73975526-73976324	Barretts	OAC	OK	93.4126	145.513	0.639465	0.719913	0.14925	0.445957	no
chr10_73975823_73976324	chr10_73975823_73976324	-	chr10:73975526-73976324	Barretts	OAC	OK	57.7884	106.255	0.878685	0.77549	0.12975	0.419864	no
chr10_74008473_74008974	chr10_74008473_74008974	-	chr10:74008472-74008974	Barretts	OAC	OK	110.898	161.527	0.542544	0.756018	0.12275	0.409308	no
chr10_74014489_74014990	chr10_74014489_74014990	-	chr10:74014488-74015242	Barretts	OAC	OK	9.13958	31.0175	1.76288	0.86256	0.1587	0.458678	no
chr10_74014741_74015242	chr10_74014741_74015242	-	chr10:74014488-74015242	Barretts	OAC	OK	51.7093	69.5211	0.427026	0.44862	0.36265	0.664642	no
chr10_74020346_74020847	chr10_74020346_74020847	-	chr10:74020345-74020847	Barretts	OAC	OK	106.193	185.636	0.80579	1.11426	0.02975	0.216818	no
chr10_74021306_74021807	chr10_74021306_74021807	-	chr10:74021305-74021807	Barretts	OAC	OK	39.0912	74.1399	0.923404	1.03227	0.0432	0.256315	no
chr10_74023265_74023766	chr10_74023265_74023766	-	chr10:74023264-74023766	Barretts	OAC	OK	52.7932	72.6326	0.460265	0.537393	0.2783	0.589932	no
chr10_74032605_74033106	chr10_74032605_74033106	-	chr10:74032604-74033106	Barretts	OAC	OK	98.707	119.479	0.275529	0.365744	0.44815	0.72708	no
chr10_74033365_74033866	chr10_74033365_74033866	-	chr10:74033364-74033866	Barretts	OAC	OK	357.031	571.298	0.678193	1.24908	0.01385	0.155026	no
chr10_74035727_74036228	chr10_74035727_74036228	-	chr10:74035726-74036228	Barretts	OAC	OK	43.0257	49.4636	0.201169	0.221031	0.66435	0.851203	no
chr10_74045804_74046305	chr10_74045804_74046305	-	chr10:74045803-74046305	Barretts	OAC	OK	22.8397	13.4621	-0.76264	-0.66979	0.1776	0.483405	no
chr10_74051910_74052411	chr10_74051910_74052411	-	chr10:74051909-74052411	Barretts	OAC	OK	52.6989	83.6579	0.666729	0.798259	0.1154	0.398754	no
chr10_74057618_74058119	chr10_74057618_74058119	-	chr10:74057617-74058119	Barretts	OAC	OK	184.962	335.034	0.857076	1.40041	0.00525	0.104269	no
chr10_74068250_74068751	chr10_74068250_74068751	-	chr10:74068249-74068751	Barretts	OAC	OK	97.0683	177.317	0.869257	1.18252	0.02015	0.182392	no
chr10_74069068_74069569	chr10_74069068_74069569	-	chr10:74069067-74069569	Barretts	OAC	OK	46.296	74.229	0.681095	0.787065	0.11525	0.398653	no
chr10_74070318_74070819	chr10_74070318_74070819	-	chr10:74070317-74070819	Barretts	OAC	OK	38.2878	36.3887	-0.0733919	-0.0788381	0.8757	0.949051	no
chr10_74079252_74079753	chr10_74079252_74079753	-	chr10:74079251-74080044	Barretts	OAC	OK	60.6024	85.6303	0.498746	0.447765	0.3769	0.674971	no
chr10_74079389_74079890	chr10_74079389_74079890	-	chr10:74079251-74080044	Barretts	OAC	OK	22.5832	53.7957	1.25224	0.500979	0.32255	0.631526	no
chr10_74079543_74080044	chr10_74079543_74080044	-	chr10:74079251-74080044	Barretts	OAC	OK	43.1886	58.0261	0.426052	0.297069	0.56635	0.800265	no
chr10_74080399_74080900	chr10_74080399_74080900	-	chr10:74080398-74081048	Barretts	OAC	OK	46.417	71.353	0.620318	0.49266	0.3134	0.623534	no
chr10_74080547_74081048	chr10_74080547_74081048	-	chr10:74080398-74081048	Barretts	OAC	OK	36.3505	48.5665	0.417985	0.26878	0.6294	0.834296	no
chr10_74084903_74085404	chr10_74084903_74085404	-	chr10:74084902-74085404	Barretts	OAC	OK	51.7422	32.2	-0.68428	-0.702254	0.1576	0.457291	no
chr10_74088001_74088502	chr10_74088001_74088502	-	chr10:74088000-74088502	Barretts	OAC	OK	66.4352	75.6807	0.187978	0.220421	0.6678	0.853081	no
chr10_74091291_74091792	chr10_74091291_74091792	-	chr10:74091290-74092131	Barretts	OAC	OK	83.9909	147.572	0.813118	0.706704	0.1988	0.509503	no
chr10_74091630_74092131	chr10_74091630_74092131	-	chr10:74091290-74092131	Barretts	OAC	OK	141.116	260.567	0.884779	1.04284	0.031	0.220979	no
chr10_74096786_74097287	chr10_74096786_74097287	-	chr10:74096785-74097287	Barretts	OAC	OK	56.0127	62.4164	0.156171	0.182008	0.716	0.877782	no
chr10_75423382_75423883	chr10_75423382_75423883	-	chr10:75423381-75423883	Barretts	OAC	OK	25.0082	26.1968	0.0669944	0.0660468	0.8973	0.958724	no
chr10_75489780_75490281	chr10_75489780_75490281	-	chr10:75489779-75490527	Barretts	OAC	OK	36.8012	41.2872	0.165941	0.115935	0.82585	0.929408	no
chr10_75490026_75490527	chr10_75490026_75490527	-	chr10:75489779-75490527	Barretts	OAC	OK	71.9205	94.0542	0.38709	0.415731	0.4011	0.693466	no
chr10_75503542_75504043	chr10_75503542_75504043	-	chr10:75503541-75504787	Barretts	OAC	OK	56.3744	65.3278	0.212657	0.158111	0.75265	0.895353	no
chr10_75503897_75504398	chr10_75503897_75504398	-	chr10:75503541-75504787	Barretts	OAC	OK	113.53	152.176	0.422668	0.490633	0.32	0.629444	no
chr10_75504286_75504787	chr10_75504286_75504787	-	chr10:75503541-75504787	Barretts	OAC	OK	43.5194	53.9549	0.310095	0.212001	0.67685	0.857969	no
chr10_75519208_75519709	chr10_75519208_75519709	-	chr10:75519207-75519709	Barretts	OAC	OK	22.353	22.2525	-0.0064993	-0.00627295	0.9656	0.986075	no
chr10_75528642_75529143	chr10_75528642_75529143	-	chr10:75528641-75529143	Barretts	OAC	OK	36.4561	20.3883	-0.838422	-0.832991	0.0903	0.357078	no
chr10_75532014_75532515	chr10_75532014_75532515	-	chr10:75532013-75533178	Barretts	OAC	OK	69.071	118.305	0.776363	0.677085	0.1761	0.481785	no
chr10_75532205_75532706	chr10_75532205_75532706	-	chr10:75532013-75533178	Barretts	OAC	OK	48.4786	36.5771	-0.406408	-0.207824	0.71625	0.877811	no
chr10_75532497_75532998	chr10_75532497_75532998	-	chr10:75532013-75533178	Barretts	OAC	OK	63.491	108.135	0.768204	0.602274	0.2233	0.535705	no
chr10_75532677_75533178	chr10_75532677_75533178	-	chr10:75532013-75533178	Barretts	OAC	OK	69.9114	82.3965	0.237056	0.164701	0.73975	0.889795	no
chr10_75541553_75542054	chr10_75541553_75542054	-	chr10:75541552-75542054	Barretts	OAC	OK	93.5185	90.7838	-0.0428171	-0.0547681	0.9125	0.965749	no
chr10_75544803_75545304	chr10_75544803_75545304	-	chr10:75544802-75546240	Barretts	OAC	OK	126.31	162.397	0.362554	0.398881	0.425	0.711523	no
chr10_75545103_75545604	chr10_75545103_75545604	-	chr10:75544802-75546240	Barretts	OAC	OK	77.8748	91.3219	0.229805	0.190664	0.70085	0.87055	no
chr10_75545313_75545814	chr10_75545313_75545814	-	chr10:75544802-75546240	Barretts	OAC	OK	24.2846	50.5452	1.05753	0.468689	0.44825	0.72708	no
chr10_75545739_75546240	chr10_75545739_75546240	-	chr10:75544802-75546240	Barretts	OAC	OK	42.2063	89.5225	1.08479	0.706281	0.19065	0.498148	no
chr10_75570505_75571006	chr10_75570505_75571006	-	chr10:75570504-75571905	Barretts	OAC	OK	47.7986	49.0212	0.0364379	0.0192198	0.97165	0.986424	no
chr10_75570782_75571283	chr10_75570782_75571283	-	chr10:75570504-75571905	Barretts	OAC	OK	46.2777	45.7019	-0.0180621	-0.00919587	0.9878	0.989662	no
chr10_75571121_75571622	chr10_75571121_75571622	-	chr10:75570504-75571905	Barretts	OAC	OK	41.022	93.2875	1.18528	0.661976	0.2369	0.549516	no
chr10_75571404_75571905	chr10_75571404_75571905	-	chr10:75570504-75571905	Barretts	OAC	OK	247.101	412.325	0.738679	1.09469	0.0296	0.216404	no
chr10_75579183_75579684	chr10_75579183_75579684	-	chr10:75579182-75579684	Barretts	OAC	OK	87.5776	105.302	0.265895	0.3398	0.5023	0.762172	no
chr10_75608763_75609264	chr10_75608763_75609264	-	chr10:75608762-75609264	Barretts	OAC	OK	61.4368	78.5361	0.354253	0.42056	0.39535	0.688792	no
chr10_75614045_75614546	chr10_75614045_75614546	-	chr10:75614044-75614546	Barretts	OAC	OK	27.7181	4.19691	-2.72343	-1.71736	0.0136	0.15416	no
chr10_75625450_75625951	chr10_75625450_75625951	-	chr10:75625449-75625951	Barretts	OAC	OK	50.2974	27.0093	-0.897025	-0.92697	0.06555	0.307667	no
chr10_75631648_75632149	chr10_75631648_75632149	-	chr10:75631647-75632149	Barretts	OAC	OK	102.864	129.232	0.329223	0.446076	0.3758	0.67418	no
chr10_75634147_75634648	chr10_75634147_75634648	-	chr10:75634146-75634969	Barretts	OAC	OK	128.389	115.882	-0.147867	-0.169868	0.73355	0.887457	no
chr10_75634468_75634969	chr10_75634468_75634969	-	chr10:75634146-75634969	Barretts	OAC	OK	53.1266	68.4523	0.365664	0.292868	0.5778	0.806322	no
chr10_75639326_75639827	chr10_75639326_75639827	-	chr10:75639325-75639827	Barretts	OAC	OK	72.467	121.506	0.745628	0.958229	0.05115	0.276173	no
chr10_75645740_75646241	chr10_75645740_75646241	-	chr10:75645739-75646241	Barretts	OAC	OK	53.5799	76.737	0.518231	0.603616	0.2373	0.550041	no
chr10_75647443_75647944	chr10_75647443_75647944	-	chr10:75647442-75647944	Barretts	OAC	OK	42.3661	37.3705	-0.181012	-0.195902	0.70355	0.872099	no
chr10_75648269_75648770	chr10_75648269_75648770	-	chr10:75648268-75649237	Barretts	OAC	OK	20.674	36.4873	0.819579	0.554551	0.29175	0.603608	no
chr10_75648736_75649237	chr10_75648736_75649237	-	chr10:75648268-75649237	Barretts	OAC	OK	47.9945	57.9919	0.27298	0.267137	0.5959	0.815662	no
chr10_75659112_75659613	chr10_75659112_75659613	-	chr10:75659111-75659613	Barretts	OAC	OK	28.2704	28.7737	0.0254554	0.025785	0.97055	0.986408	no
chr10_75668799_75669300	chr10_75668799_75669300	-	chr10:75668798-75669300	Barretts	OAC	OK	28.8295	45.7153	0.665131	0.689657	0.158	0.457917	no
chr10_75670588_75671089	chr10_75670588_75671089	-	chr10:75670587-75671521	Barretts	OAC	OK	49.6852	18.2739	-1.44304	-0.873972	0.098	0.370809	no
chr10_75670760_75671261	chr10_75670760_75671261	-	chr10:75670587-75671521	Barretts	OAC	OK	16.1702	28.2528	0.805059	0.374444	0.48335	0.750845	no
chr10_75671020_75671521	chr10_75671020_75671521	-	chr10:75670587-75671521	Barretts	OAC	OK	44.5318	32.5213	-0.453452	-0.339897	0.49805	0.759729	no
chr10_75691979_75692480	chr10_75691979_75692480	-	chr10:75691978-75692480	Barretts	OAC	OK	72.4918	91.4926	0.335836	0.418174	0.39125	0.685145	no
chr10_75700281_75700782	chr10_75700281_75700782	-	chr10:75700280-75700782	Barretts	OAC	OK	62.3345	68.5027	0.136129	0.164423	0.73355	0.887457	no
chr10_75716392_75716893	chr10_75716392_75716893	-	chr10:75716391-75716893	Barretts	OAC	OK	43.1936	38.4988	-0.166004	-0.174648	0.729	0.884745	no
chr10_75717037_75717538	chr10_75717037_75717538	-	chr10:75717036-75717538	Barretts	OAC	OK	25.6876	17.0638	-0.590136	-0.571609	0.24395	0.556532	no
chr10_75724990_75725491	chr10_75724990_75725491	-	chr10:75724989-75726245	Barretts	OAC	OK	18.0898	23.154	0.356079	0.158046	0.78335	0.910383	no
chr10_75725452_75725953	chr10_75725452_75725953	-	chr10:75724989-75726245	Barretts	OAC	OK	29.1946	22.1404	-0.399019	-0.210402	0.7215	0.880711	no
chr10_75725744_75726245	chr10_75725744_75726245	-	chr10:75724989-75726245	Barretts	OAC	OK	60.7348	94.0525	0.630942	0.622601	0.20885	0.521357	no
chr10_75729315_75729816	chr10_75729315_75729816	-	chr10:75729314-75729816	Barretts	OAC	OK	17.7216	20.0549	0.178448	0.173132	0.72955	0.885045	no
chr10_75751570_75752071	chr10_75751570_75752071	-	chr10:75751569-75752071	Barretts	OAC	OK	31.0756	19.7091	-0.656915	-0.64281	0.1935	0.502278	no
chr10_75757485_75757986	chr10_75757485_75757986	-	chr10:75757484-75758329	Barretts	OAC	OK	378.181	689.072	0.865579	1.55497	0.002	0.0667088	no
chr10_75757828_75758329	chr10_75757828_75758329	-	chr10:75757484-75758329	Barretts	OAC	OK	56.5851	87.6492	0.631317	0.385849	0.45295	0.729944	no
chr10_75758734_75759235	chr10_75758734_75759235	-	chr10:75758733-75759235	Barretts	OAC	OK	47.6718	106.078	1.15392	1.39737	0.00645	0.113722	no
chr10_75777923_75778424	chr10_75777923_75778424	-	chr10:75777922-75778424	Barretts	OAC	OK	42.5101	45.3461	0.0931731	0.102289	0.83	0.93128	no
chr10_75816222_75816723	chr10_75816222_75816723	-	chr10:75816221-75816723	Barretts	OAC	OK	14.4292	37.7307	1.38675	1.19243	0.02495	0.199726	no
chr10_75837733_75838234	chr10_75837733_75838234	-	chr10:75837732-75838234	Barretts	OAC	OK	25.5283	33.1099	0.375164	0.36621	0.4691	0.740492	no
chr10_75840913_75841414	chr10_75840913_75841414	-	chr10:75840912-75841414	Barretts	OAC	OK	28.5342	28.8691	0.0168334	0.0177503	0.9702	0.986408	no
chr10_75878504_75879005	chr10_75878504_75879005	-	chr10:75878503-75879005	Barretts	OAC	OK	17.2302	14.2485	-0.274136	-0.246983	0.61675	0.827071	no
chr10_75909888_75910389	chr10_75909888_75910389	-	chr10:75909887-75911610	Barretts	OAC	OK	22.6025	47.6422	1.07576	0.462005	0.4824	0.750218	no
chr10_75910097_75910598	chr10_75910097_75910598	-	chr10:75909887-75911610	Barretts	OAC	OK	58.2334	78.8777	0.43777	0.281404	0.5736	0.804426	no
chr10_75910283_75910784	chr10_75910283_75910784	-	chr10:75909887-75911610	Barretts	OAC	OK	55.9795	72.7481	0.378013	0.22633	0.6414	0.840003	no
chr10_75910638_75911139	chr10_75910638_75911139	-	chr10:75909887-75911610	Barretts	OAC	OK	144.826	235.538	0.701644	0.790002	0.11535	0.398754	no
chr10_75910926_75911427	chr10_75910926_75911427	-	chr10:75909887-75911610	Barretts	OAC	OK	63.613	81.0708	0.349862	0.224431	0.67485	0.856998	no
chr10_75911109_75911610	chr10_75911109_75911610	-	chr10:75909887-75911610	Barretts	OAC	OK	43.4375	43.3923	-0.00150133	-0.000735629	0.9884	0.98985	no
chr10_789247_789748	chr10_789247_789748	-	chr10:789246-789748	Barretts	OAC	OK	18.7057	36.3694	0.959247	0.863814	0.0882	0.353755	no
chr10_789803_790304	chr10_789803_790304	-	chr10:789802-790304	Barretts	OAC	OK	13.8775	12.7459	-0.122707	-0.108607	0.83055	0.931506	no
chr10_818074_818575	chr10_818074_818575	-	chr10:818073-818575	Barretts	OAC	OK	26.9315	16.2263	-0.730959	-0.661884	0.18555	0.492246	no
chr10_821325_821826	chr10_821325_821826	-	chr10:821324-821826	Barretts	OAC	OK	42.251	29.948	-0.496528	-0.515746	0.29215	0.603897	no
chr10_830303_830804	chr10_830303_830804	-	chr10:830302-831144	Barretts	OAC	OK	34.0042	21.8499	-0.638081	-0.396031	0.47	0.740994	no
chr10_830643_831144	chr10_830643_831144	-	chr10:830302-831144	Barretts	OAC	OK	69.7218	58.9257	-0.242713	-0.239379	0.62275	0.830508	no
chr10_834720_835221	chr10_834720_835221	-	chr10:834719-835828	Barretts	OAC	OK	24.9097	18.3816	-0.43845	-0.219609	0.66395	0.850972	no
chr10_834909_835410	chr10_834909_835410	-	chr10:834719-835828	Barretts	OAC	OK	31.6906	19.4812	-0.70197	-0.378583	0.5127	0.76798	no
chr10_835327_835828	chr10_835327_835828	-	chr10:834719-835828	Barretts	OAC	OK	53.2407	62.8071	0.238398	0.21363	0.66375	0.850904	no
chr10_835926_836427	chr10_835926_836427	-	chr10:835925-836427	Barretts	OAC	OK	44.9739	36.7862	-0.289921	-0.291194	0.54985	0.791494	no
chr10_840430_840931	chr10_840430_840931	-	chr10:840429-840931	Barretts	OAC	OK	37.9195	23.1782	-0.710172	-0.692468	0.1704	0.474276	no
chr10_856170_856671	chr10_856170_856671	-	chr10:856169-856671	Barretts	OAC	OK	17.4987	15.3758	-0.186582	-0.168784	0.73035	0.885555	no
chr10_88515328_88515829	chr10_88515328_88515829	-	chr10:88515327-88515829	Barretts	OAC	OK	67.8215	72.6357	0.0989349	0.120745	0.80905	0.922473	no
chr10_88515960_88516461	chr10_88515960_88516461	-	chr10:88515959-88516461	Barretts	OAC	OK	164.292	222.012	0.434377	0.645833	0.1982	0.508789	no
chr10_88526197_88526698	chr10_88526197_88526698	-	chr10:88526196-88526698	Barretts	OAC	OK	11.1038	33.9898	1.61404	1.40403	0.0092	0.131566	no
chr10_88534848_88535349	chr10_88534848_88535349	-	chr10:88534847-88535349	Barretts	OAC	OK	27.0466	8.56156	-1.6595	-1.33829	0.0183	0.175356	no
chr10_88546080_88546581	chr10_88546080_88546581	-	chr10:88546079-88546581	Barretts	OAC	OK	34.6921	48.4213	0.481035	0.488301	0.33445	0.641347	no
chr10_88583874_88584375	chr10_88583874_88584375	-	chr10:88583873-88584375	Barretts	OAC	OK	14.3957	12.147	-0.245031	-0.200885	0.68015	0.859682	no
chr10_88622548_88623049	chr10_88622548_88623049	-	chr10:88622547-88623049	Barretts	OAC	OK	25.6481	27.1887	0.0841539	0.0837362	0.8589	0.943098	no
chr10_88659384_88659885	chr10_88659384_88659885	-	chr10:88659383-88659885	Barretts	OAC	OK	24.6445	29.28	0.248648	0.249552	0.6079	0.823477	no
chr10_88682325_88682826	chr10_88682325_88682826	-	chr10:88682324-88682826	Barretts	OAC	OK	34.147	35.3351	0.0493433	0.046214	0.92425	0.971101	no
chr10_88699108_88699609	chr10_88699108_88699609	-	chr10:88699107-88699609	Barretts	OAC	OK	114.375	163.899	0.519034	0.727661	0.14005	0.432995	no
chr10_88705296_88705797	chr10_88705296_88705797	-	chr10:88705295-88705797	Barretts	OAC	OK	25.2511	15.4339	-0.710241	-0.656884	0.1938	0.502644	no
chr10_88718137_88718638	chr10_88718137_88718638	-	chr10:88718136-88719338	Barretts	OAC	OK	43.1448	27.5959	-0.644735	-0.441647	0.3794	0.676886	no
chr10_88718590_88719091	chr10_88718590_88719091	-	chr10:88718136-88719338	Barretts	OAC	OK	41.686	33.7185	-0.306021	-0.222948	0.67075	0.85475	no
chr10_88718837_88719338	chr10_88718837_88719338	-	chr10:88718136-88719338	Barretts	OAC	OK	37.9262	38.8842	0.0359901	0.0263686	0.955	0.982945	no
chr10_88720099_88720600	chr10_88720099_88720600	-	chr10:88720098-88720600	Barretts	OAC	OK	61.5654	87.8849	0.513495	0.631524	0.2074	0.519974	no
chr10_88726253_88726754	chr10_88726253_88726754	-	chr10:88726252-88726754	Barretts	OAC	OK	72.3284	84.0766	0.217144	0.269679	0.5822	0.808509	no
chr10_88727871_88728372	chr10_88727871_88728372	-	chr10:88727870-88728372	Barretts	OAC	OK	70.2603	113.525	0.692234	0.873846	0.08185	0.342611	no
chr10_88730762_88731263	chr10_88730762_88731263	-	chr10:88730761-88731644	Barretts	OAC	OK	111.623	168.537	0.594424	0.718582	0.1535	0.452176	no
chr10_88731143_88731644	chr10_88731143_88731644	-	chr10:88730761-88731644	Barretts	OAC	OK	77.0571	125.116	0.699264	0.721185	0.15525	0.454601	no
chr10_88739732_88740233	chr10_88739732_88740233	-	chr10:88739731-88740395	Barretts	OAC	OK	42.3553	29.7633	-0.509007	-0.381234	0.47555	0.745626	no
chr10_88739894_88740395	chr10_88739894_88740395	-	chr10:88739731-88740395	Barretts	OAC	OK	20.8421	25.0049	0.262708	0.134217	0.7769	0.907004	no
chr10_88768027_88768528	chr10_88768027_88768528	-	chr10:88768026-88768528	Barretts	OAC	OK	32.7058	55.4913	0.762717	0.839789	0.09405	0.364133	no
chr10_88779775_88780276	chr10_88779775_88780276	-	chr10:88779774-88780276	Barretts	OAC	OK	32.9775	19.3987	-0.76552	-0.785591	0.1209	0.407352	no
chr10_88797893_88798394	chr10_88797893_88798394	-	chr10:88797892-88798930	Barretts	OAC	OK	22.9199	15.5174	-0.562709	-0.273587	0.5811	0.808045	no
chr10_88798121_88798622	chr10_88798121_88798622	-	chr10:88797892-88798930	Barretts	OAC	OK	27.702	13.3048	-1.05804	-0.512623	0.35485	0.658175	no
chr10_88798429_88798930	chr10_88798429_88798930	-	chr10:88797892-88798930	Barretts	OAC	OK	49.2319	37.8742	-0.378378	-0.313308	0.5495	0.791213	no
chr10_88853577_88854078	chr10_88853577_88854078	-	chr10:88853576-88854256	Barretts	OAC	OK	28.8475	52.1832	0.855141	0.560998	0.30395	0.615644	no
chr10_88853755_88854256	chr10_88853755_88854256	-	chr10:88853576-88854256	Barretts	OAC	OK	37.0747	75.7734	1.03125	0.795713	0.1025	0.37858	no
chr10_88854443_88854944	chr10_88854443_88854944	-	chr10:88854442-88855464	Barretts	OAC	OK	108.209	272.297	1.33137	1.30878	0.0143	0.157232	no
chr10_88854606_88855107	chr10_88854606_88855107	-	chr10:88854442-88855464	Barretts	OAC	OK	93.4474	131.577	0.493685	0.331533	0.49795	0.75971	no
chr10_88854963_88855464	chr10_88854963_88855464	-	chr10:88854442-88855464	Barretts	OAC	OK	134.51	208.189	0.630182	0.655722	0.1862	0.492941	no
chr10_88960671_88961172	chr10_88960671_88961172	-	chr10:88960670-88961172	Barretts	OAC	OK	30.4704	31.9369	0.0678181	0.072065	0.8841	0.952949	no
chr10_88963142_88963643	chr10_88963142_88963643	-	chr10:88963141-88963893	Barretts	OAC	OK	50.1177	60.4091	0.269444	0.268219	0.593	0.81422	no
chr10_88963392_88963893	chr10_88963392_88963893	-	chr10:88963141-88963893	Barretts	OAC	OK	21.4173	20.7813	-0.0434938	-0.0239141	0.96895	0.986294	no
chr10_88974331_88974832	chr10_88974331_88974832	-	chr10:88974330-88974832	Barretts	OAC	OK	34.1457	23.9971	-0.508843	-0.509476	0.296	0.607411	no
chr10_88975822_88976323	chr10_88975822_88976323	-	chr10:88975821-88976323	Barretts	OAC	OK	24.7833	26.0214	0.0703345	0.0681713	0.8964	0.958174	no
chr10_89260286_89260787	chr10_89260286_89260787	-	chr10:89260285-89260787	Barretts	OAC	OK	22.8866	19.7681	-0.21133	-0.190998	0.69035	0.864632	no
chr10_89264347_89264848	chr10_89264347_89264848	-	chr10:89264346-89265495	Barretts	OAC	OK	92.489	105.652	0.191961	0.204814	0.6836	0.861103	no
chr10_89264761_89265262	chr10_89264761_89265262	-	chr10:89264346-89265495	Barretts	OAC	OK	36.431	26.9336	-0.435757	-0.232483	0.6486	0.843342	no
chr10_89264994_89265495	chr10_89264994_89265495	-	chr10:89264346-89265495	Barretts	OAC	OK	58.1038	48.8764	-0.249495	-0.18742	0.70335	0.872069	no
chr10_89320583_89321084	chr10_89320583_89321084	-	chr10:89320582-89321084	Barretts	OAC	OK	11.2203	13.2858	0.24377	0.198944	0.6917	0.865203	no
chr10_89338755_89339256	chr10_89338755_89339256	-	chr10:89338754-89339256	Barretts	OAC	OK	30.137	22.5496	-0.41843	-0.411212	0.40645	0.697624	no
chr10_89345850_89346351	chr10_89345850_89346351	-	chr10:89345849-89346351	Barretts	OAC	OK	45.9632	46.7744	0.0252394	0.0279059	0.9474	0.980381	no
chr10_89356084_89356585	chr10_89356084_89356585	-	chr10:89356083-89356585	Barretts	OAC	OK	22.1421	21.297	-0.0561416	-0.0517473	0.9094	0.96455	no
chr10_89378496_89378997	chr10_89378496_89378997	-	chr10:89378495-89378997	Barretts	OAC	OK	47.272	30.2157	-0.645687	-0.690154	0.1632	0.464996	no
chr10_89395413_89395914	chr10_89395413_89395914	-	chr10:89395412-89395914	Barretts	OAC	OK	46.6301	54.5641	0.226691	0.255989	0.60745	0.823155	no
chr10_89413922_89414423	chr10_89413922_89414423	-	chr10:89413921-89414423	Barretts	OAC	OK	26.7185	24.9169	-0.100717	-0.0928711	0.8474	0.937958	no
chr10_89419214_89419715	chr10_89419214_89419715	-	chr10:89419213-89420144	Barretts	OAC	OK	46.7022	33.4994	-0.479354	-0.341515	0.5174	0.77128	no
chr10_89419320_89419821	chr10_89419320_89419821	-	chr10:89419213-89420144	Barretts	OAC	OK	27.5916	27.9163	0.0168781	0.00951114	0.9848	0.988927	no
chr10_89419643_89420144	chr10_89419643_89420144	-	chr10:89419213-89420144	Barretts	OAC	OK	35.2699	29.8715	-0.239667	-0.165837	0.74055	0.890143	no
chr10_89451214_89451715	chr10_89451214_89451715	-	chr10:89451213-89451715	Barretts	OAC	OK	22.6228	28.715	0.344028	0.34184	0.48565	0.752326	no
chr10_89453701_89454202	chr10_89453701_89454202	-	chr10:89453700-89454644	Barretts	OAC	OK	18.9431	8.03127	-1.23797	-0.593558	0.24455	0.55702	no
chr10_89453998_89454499	chr10_89453998_89454499	-	chr10:89453700-89454644	Barretts	OAC	OK	23.8075	20.3036	-0.229678	-0.151759	0.76375	0.900437	no
chr10_89454143_89454644	chr10_89454143_89454644	-	chr10:89453700-89454644	Barretts	OAC	OK	16.8946	9.75689	-0.792067	-0.380238	0.4908	0.755822	no
chr10_89454793_89455294	chr10_89454793_89455294	-	chr10:89454792-89455294	Barretts	OAC	OK	29.693	16.5461	-0.84363	-0.803054	0.1021	0.378025	no
chr10_89461187_89461688	chr10_89461187_89461688	-	chr10:89461186-89461688	Barretts	OAC	OK	29.4213	34.4306	0.226831	0.237378	0.64025	0.839638	no
chr10_89494916_89495417	chr10_89494916_89495417	-	chr10:89494915-89495417	Barretts	OAC	OK	32.5698	18.8868	-0.786152	-0.790553	0.10705	0.387052	no
chr10_89577753_89578254	chr10_89577753_89578254	-	chr10:89577752-89578711	Barretts	OAC	OK	142.742	183.27	0.360558	0.456193	0.37305	0.671926	no
chr10_89578210_89578711	chr10_89578210_89578711	-	chr10:89577752-89578711	Barretts	OAC	OK	52.7309	56.131	0.0901504	0.056037	0.91215	0.965631	no
chr10_89601979_89602480	chr10_89601979_89602480	-	chr10:89601978-89602480	Barretts	OAC	OK	94.0307	220.451	1.22926	1.75169	0.00075	0.0391552	yes
chr10_89604941_89605442	chr10_89604941_89605442	-	chr10:89604940-89605442	Barretts	OAC	OK	25.4299	64.7962	1.34939	1.47792	0.00475	0.100428	no
chr10_89610469_89610970	chr10_89610469_89610970	-	chr10:89610468-89610970	Barretts	OAC	OK	30.4663	39.7571	0.383998	0.388609	0.42895	0.714376	no
chr10_89621242_89621743	chr10_89621242_89621743	-	chr10:89621241-89623482	Barretts	OAC	OK	47.1965	107.068	1.18178	0.701607	0.1785	0.484468	no
chr10_89621622_89622123	chr10_89621622_89622123	-	chr10:89621241-89623482	Barretts	OAC	OK	57.7482	67.2563	0.219894	0.117102	0.82865	0.930694	no
chr10_89621899_89622400	chr10_89621899_89622400	-	chr10:89621241-89623482	Barretts	OAC	OK	157.389	306.422	0.961182	1.05431	0.0358	0.235702	no
chr10_89622306_89622807	chr10_89622306_89622807	-	chr10:89621241-89623482	Barretts	OAC	OK	46.742	55.791	0.255312	0.124138	0.8393	0.935201	no
chr10_89622648_89623149	chr10_89622648_89623149	-	chr10:89621241-89623482	Barretts	OAC	OK	52.5701	74.1933	0.497048	0.249536	0.6548	0.847165	no
chr10_89622981_89623482	chr10_89622981_89623482	-	chr10:89621241-89623482	Barretts	OAC	OK	139.805	229.413	0.714534	0.694809	0.1681	0.470999	no
chr10_90188187_90188688	chr10_90188187_90188688	-	chr10:90188186-90188688	Barretts	OAC	OK	19.5171	18.0043	-0.116398	-0.106969	0.8287	0.930717	no
chr10_90197189_90197690	chr10_90197189_90197690	-	chr10:90197188-90197690	Barretts	OAC	OK	33.4729	34.9246	0.06125	0.063561	0.90205	0.960851	no
chr10_90217398_90217899	chr10_90217398_90217899	-	chr10:90217397-90217899	Barretts	OAC	OK	27.9211	11.2254	-1.31459	-1.14551	0.02705	0.207841	no
chr10_90234270_90234771	chr10_90234270_90234771	-	chr10:90234269-90234771	Barretts	OAC	OK	37.8164	35.9664	-0.0723619	-0.0735271	0.8806	0.951242	no
chr10_90312877_90313378	chr10_90312877_90313378	-	chr10:90312876-90313378	Barretts	OAC	OK	51.6799	27.0479	-0.934084	-0.992777	0.0465	0.264622	no
chr10_90342628_90343129	chr10_90342628_90343129	-	chr10:90342627-90343336	Barretts	OAC	OK	53.7973	26.8275	-1.00382	-0.774339	0.14455	0.438919	no
chr10_90342835_90343336	chr10_90342835_90343336	-	chr10:90342627-90343336	Barretts	OAC	OK	57.6062	22.0194	-1.38745	-0.993259	0.0544	0.284304	no
chr10_90415298_90415799	chr10_90415298_90415799	-	chr10:90415297-90415799	Barretts	OAC	OK	38.5729	19.3025	-0.998796	-0.859003	0.08685	0.351866	no
chr10_90462641_90463142	chr10_90462641_90463142	-	chr10:90462640-90463460	Barretts	OAC	OK	26.9279	27.5411	0.0324813	0.0168677	0.97535	0.986971	no
chr10_90462959_90463460	chr10_90462959_90463460	-	chr10:90462640-90463460	Barretts	OAC	OK	68.4451	142.138	1.05428	1.21001	0.0184	0.175734	no
chr10_90485736_90486237	chr10_90485736_90486237	-	chr10:90485735-90486237	Barretts	OAC	OK	22.0919	8.95714	-1.30241	-1.1012	0.03225	0.224737	no
chr10_90488119_90488620	chr10_90488119_90488620	-	chr10:90488118-90488620	Barretts	OAC	OK	25.8831	28.2971	0.128645	0.12238	0.8067	0.921577	no
chr10_90490997_90491498	chr10_90490997_90491498	-	chr10:90490996-90491498	Barretts	OAC	OK	47.5377	46.5138	-0.0314139	-0.0333847	0.9424	0.979005	no
chr10_90503715_90504216	chr10_90503715_90504216	-	chr10:90503714-90504216	Barretts	OAC	OK	39.7954	18.3059	-1.12029	-1.12337	0.0296	0.216404	no
chr10_90551605_90552106	chr10_90551605_90552106	-	chr10:90551604-90552106	Barretts	OAC	OK	18.3917	12.7271	-0.531149	-0.438092	0.3655	0.666044	no
chr10_90552418_90552919	chr10_90552418_90552919	-	chr10:90552417-90552919	Barretts	OAC	OK	16.005	22.6131	0.498632	0.465726	0.3431	0.649105	no
chr10_90569935_90570436	chr10_90569935_90570436	-	chr10:90569934-90570436	Barretts	OAC	OK	36.9962	23.9452	-0.627645	-0.64292	0.2039	0.515516	no
chr10_90595291_90595792	chr10_90595291_90595792	-	chr10:90595290-90595792	Barretts	OAC	OK	58.7286	57.637	-0.0270676	-0.0306049	0.9521	0.981776	no
chr10_90608170_90608671	chr10_90608170_90608671	-	chr10:90608169-90608671	Barretts	OAC	OK	24.2335	37.6459	0.635492	0.654545	0.19005	0.497625	no
chr10_90611375_90611876	chr10_90611375_90611876	-	chr10:90611374-90611876	Barretts	OAC	OK	117.264	251.808	1.10256	1.62631	0.002	0.0667088	no
chr10_90612009_90612510	chr10_90612009_90612510	-	chr10:90612008-90612510	Barretts	OAC	OK	33.8478	33.1512	-0.0300019	-0.0315116	0.95375	0.982588	no
chr10_90625229_90625730	chr10_90625229_90625730	-	chr10:90625228-90625730	Barretts	OAC	OK	23.9283	13.3669	-0.840048	-0.769429	0.1164	0.399969	no
chr10_90639658_90640159	chr10_90639658_90640159	-	chr10:90639657-90640935	Barretts	OAC	OK	49.7485	44.6787	-0.155067	-0.0913371	0.863	0.944596	no
chr10_90639925_90640426	chr10_90639925_90640426	-	chr10:90639657-90640935	Barretts	OAC	OK	58.8378	78.5058	0.416056	0.300232	0.5517	0.79284	no
chr10_90640189_90640690	chr10_90640189_90640690	-	chr10:90639657-90640935	Barretts	OAC	OK	61.496	98.6409	0.681692	0.516036	0.3054	0.617037	no
chr10_90640434_90640935	chr10_90640434_90640935	-	chr10:90639657-90640935	Barretts	OAC	OK	96.2032	102.786	0.0954832	0.0826976	0.86345	0.944723	no
chr10_90656048_90656549	chr10_90656048_90656549	-	chr10:90656047-90656549	Barretts	OAC	OK	78.9868	105.338	0.415344	0.523621	0.29495	0.606302	no
chr10_90657245_90657746	chr10_90657245_90657746	-	chr10:90657244-90657746	Barretts	OAC	OK	47.0384	40.2733	-0.224016	-0.235393	0.6281	0.833398	no
chr10_90663358_90663859	chr10_90663358_90663859	-	chr10:90663357-90664126	Barretts	OAC	OK	25.895	15.9831	-0.696127	-0.413963	0.4306	0.715224	no
chr10_90663625_90664126	chr10_90663625_90664126	-	chr10:90663357-90664126	Barretts	OAC	OK	28.3448	16.8294	-0.7521	-0.475184	0.36	0.66282	no
chr10_91226265_91226766	chr10_91226265_91226766	-	chr10:91226264-91226766	Barretts	OAC	OK	31.7049	35.0552	0.144922	0.149956	0.76735	0.902359	no
chr10_91228317_91228818	chr10_91228317_91228818	-	chr10:91228316-91228818	Barretts	OAC	OK	27.5273	21.626	-0.348098	-0.342511	0.48275	0.750561	no
chr10_91237743_91238244	chr10_91237743_91238244	-	chr10:91237742-91238244	Barretts	OAC	OK	21.0642	23.9686	0.186354	0.169718	0.7383	0.889095	no
chr10_91265449_91265950	chr10_91265449_91265950	-	chr10:91265448-91265950	Barretts	OAC	OK	20.4255	16.8284	-0.279479	-0.243865	0.6119	0.825523	no
chr10_91313122_91313623	chr10_91313122_91313623	-	chr10:91313121-91313623	Barretts	OAC	OK	77.1736	72.8421	-0.0833349	-0.0963866	0.8471	0.937835	no
chr10_91339959_91340460	chr10_91339959_91340460	-	chr10:91339958-91340460	Barretts	OAC	OK	24.3125	7.43863	-1.70859	-1.27638	0.01895	0.177912	no
chr10_91349065_91349566	chr10_91349065_91349566	-	chr10:91349064-91349566	Barretts	OAC	OK	14.1687	3.2876	-2.1076	-1.11435	0.0499	0.272824	no
chr10_91403612_91404113	chr10_91403612_91404113	-	chr10:91403611-91405258	Barretts	OAC	OK	285.465	341.9	0.260261	0.353304	0.48235	0.750174	no
chr10_91403860_91404361	chr10_91403860_91404361	-	chr10:91403611-91405258	Barretts	OAC	OK	55.7097	56.4422	0.0188473	0.00909333	0.9849	0.988927	no
chr10_91404051_91404552	chr10_91404051_91404552	-	chr10:91403611-91405258	Barretts	OAC	OK	36.6094	42.3545	0.210303	0.0959805	0.91185	0.965531	no
chr10_91404322_91404823	chr10_91404322_91404823	-	chr10:91403611-91405258	Barretts	OAC	OK	28.966	40.5228	0.484373	0.222082	0.7665	0.901784	no
chr10_91404594_91405095	chr10_91404594_91405095	-	chr10:91403611-91405258	Barretts	OAC	OK	35.2778	55.8427	0.662609	0.28351	0.6211	0.829388	no
chr10_91404757_91405258	chr10_91404757_91405258	-	chr10:91403611-91405258	Barretts	OAC	OK	68.257	65.5521	-0.0583355	-0.0318961	0.9483	0.980571	no
chr10_91428325_91428826	chr10_91428325_91428826	-	chr10:91428324-91429067	Barretts	OAC	OK	44.7112	45.7667	0.0336629	0.0219843	0.96665	0.986226	no
chr10_91428566_91429067	chr10_91428566_91429067	-	chr10:91428324-91429067	Barretts	OAC	OK	25.5115	31.9247	0.323523	0.15322	0.7552	0.896763	no
chr10_91460742_91461243	chr10_91460742_91461243	-	chr10:91460741-91461807	Barretts	OAC	OK	90.473	87.1645	-0.0537465	-0.0297031	0.9513	0.981744	no
chr10_91461004_91461505	chr10_91461004_91461505	-	chr10:91460741-91461807	Barretts	OAC	OK	583.997	600.591	0.0404208	0.0688269	0.89535	0.957846	no
chr10_91461306_91461807	chr10_91461306_91461807	-	chr10:91460741-91461807	Barretts	OAC	OK	71.1201	64.8246	-0.133716	-0.062398	0.9066	0.963246	no
chr10_91500794_91501295	chr10_91500794_91501295	-	chr10:91500793-91501295	Barretts	OAC	OK	26.5525	7.32911	-1.85714	-1.50302	0.0127	0.150473	no
chr10_91544797_91545298	chr10_91544797_91545298	-	chr10:91544796-91545298	Barretts	OAC	OK	18.7707	104.258	2.4736	2.4168	0.00015	0.015408	yes
chr10_91553333_91553834	chr10_91553333_91553834	-	chr10:91553332-91553834	Barretts	OAC	OK	56.024	35.5262	-0.657159	-0.723461	0.14725	0.442946	no
chr10_91574847_91575348	chr10_91574847_91575348	-	chr10:91574846-91575348	Barretts	OAC	OK	43.1567	16.4606	-1.39056	-1.37643	0.0081	0.125192	no
chr10_91596746_91597247	chr10_91596746_91597247	-	chr10:91596745-91597856	Barretts	OAC	OK	79.3844	34.1016	-1.21902	-0.943823	0.0622	0.300448	no
chr10_91597033_91597534	chr10_91597033_91597534	-	chr10:91596745-91597856	Barretts	OAC	OK	40.3731	25.5144	-0.662081	-0.375196	0.5007	0.761403	no
chr10_91597355_91597856	chr10_91597355_91597856	-	chr10:91596745-91597856	Barretts	OAC	OK	48.3165	25.1975	-0.939234	-0.590321	0.2242	0.536496	no
chr10_91613433_91613934	chr10_91613433_91613934	-	chr10:91613432-91614114	Barretts	OAC	OK	11.2003	15.2999	0.449983	0.209646	0.69515	0.867182	no
chr10_91613613_91614114	chr10_91613613_91614114	-	chr10:91613432-91614114	Barretts	OAC	OK	22.4205	18.6844	-0.262986	-0.167032	0.74955	0.894322	no
chr10_91621641_91622142	chr10_91621641_91622142	-	chr10:91621640-91622142	Barretts	OAC	OK	37.3986	47.8851	0.356594	0.353326	0.48645	0.752751	no
chr10_93169174_93169675	chr10_93169174_93169675	-	chr10:93169173-93170643	Barretts	OAC	OK	101.608	120.507	0.246105	0.199915	0.6775	0.858356	no
chr10_93169407_93169908	chr10_93169407_93169908	-	chr10:93169173-93170643	Barretts	OAC	OK	61.6807	50.9089	-0.276901	-0.143893	0.78795	0.912711	no
chr10_93169585_93170086	chr10_93169585_93170086	-	chr10:93169173-93170643	Barretts	OAC	OK	60.9333	53.3683	-0.191247	-0.105922	0.8403	0.935541	no
chr10_93169835_93170336	chr10_93169835_93170336	-	chr10:93169173-93170643	Barretts	OAC	OK	108.775	140.078	0.364881	0.308995	0.56235	0.798587	no
chr10_93170142_93170643	chr10_93170142_93170643	-	chr10:93169173-93170643	Barretts	OAC	OK	96.8334	85.1202	-0.186003	-0.141158	0.7762	0.906612	no
chr10_93236158_93236659	chr10_93236158_93236659	-	chr10:93236157-93236659	Barretts	OAC	OK	30.4328	24.9628	-0.285848	-0.279002	0.56515	0.799726	no
chr10_93316364_93316865	chr10_93316364_93316865	-	chr10:93316363-93317076	Barretts	OAC	OK	117.307	129.594	0.143699	0.168531	0.732	0.88666	no
chr10_93316575_93317076	chr10_93316575_93317076	-	chr10:93316363-93317076	Barretts	OAC	OK	58.0056	58.8687	0.0213083	0.0161473	0.97265	0.986525	no
chr10_93326345_93326846	chr10_93326345_93326846	-	chr10:93326344-93326846	Barretts	OAC	OK	20.4859	8.16413	-1.32726	-1.05492	0.0433	0.256558	no
chr10_93350736_93351237	chr10_93350736_93351237	-	chr10:93350735-93351584	Barretts	OAC	OK	28.8736	19.9427	-0.533886	-0.315254	0.4966	0.75938	no
chr10_93351083_93351584	chr10_93351083_93351584	-	chr10:93350735-93351584	Barretts	OAC	OK	56.0213	48.8565	-0.197425	-0.190378	0.7127	0.876391	no
chr10_93357060_93357561	chr10_93357060_93357561	-	chr10:93357059-93357561	Barretts	OAC	OK	34.2621	33.5194	-0.031617	-0.0309811	0.95155	0.981744	no
chr10_93363607_93364108	chr10_93363607_93364108	-	chr10:93363606-93364108	Barretts	OAC	OK	21.4673	21.1777	-0.0195894	-0.01937	0.9581	0.983477	no
chr10_93368484_93368985	chr10_93368484_93368985	-	chr10:93368483-93368985	Barretts	OAC	OK	36.764	19.7919	-0.893381	-0.827652	0.1011	0.376323	no
chr10_93373063_93373564	chr10_93373063_93373564	-	chr10:93373062-93373865	Barretts	OAC	OK	34.1581	26.4054	-0.371396	-0.230466	0.64665	0.842067	no
chr10_93373364_93373865	chr10_93373364_93373865	-	chr10:93373062-93373865	Barretts	OAC	OK	55.3055	47.1623	-0.22979	-0.206978	0.7006	0.87055	no
chr10_93392693_93393194	chr10_93392693_93393194	-	chr10:93392692-93393194	Barretts	OAC	OK	161.465	246.65	0.611247	0.915867	0.06785	0.31302	no
chr10_93395074_93395575	chr10_93395074_93395575	-	chr10:93395073-93395575	Barretts	OAC	OK	37.6316	50.1669	0.41479	0.452584	0.37725	0.675161	no
chr10_93403439_93403940	chr10_93403439_93403940	-	chr10:93403438-93403940	Barretts	OAC	OK	32.0858	34.5502	0.106759	0.11255	0.8222	0.92794	no
chr10_93431750_93432251	chr10_93431750_93432251	-	chr10:93431749-93432538	Barretts	OAC	OK	24.5513	10.4222	-1.23615	-0.877099	0.09325	0.362284	no
chr10_93432037_93432538	chr10_93432037_93432538	-	chr10:93431749-93432538	Barretts	OAC	OK	22.3351	5.73596	-1.96121	-1.08934	0.07175	0.320523	no
chr10_93441400_93441901	chr10_93441400_93441901	-	chr10:93441399-93442148	Barretts	OAC	OK	18.8657	9.61368	-0.972608	-0.613194	0.2299	0.543032	no
chr10_93441647_93442148	chr10_93441647_93442148	-	chr10:93441399-93442148	Barretts	OAC	OK	27.2763	9.75776	-1.48302	-1.0463	0.07145	0.320004	no
chr10_93449476_93449977	chr10_93449476_93449977	-	chr10:93449475-93449977	Barretts	OAC	OK	34.8868	6.46052	-2.43296	-1.86537	0.00475	0.100428	no
chr10_93504680_93505181	chr10_93504680_93505181	-	chr10:93504679-93505403	Barretts	OAC	NOTEST	10.9758	4.32342	-1.34408	0	1	1	no
chr10_93504902_93505403	chr10_93504902_93505403	-	chr10:93504679-93505403	Barretts	OAC	OK	46.1162	46.5924	0.0148206	0.0148317	0.98155	0.988219	no
chr10_93509330_93509831	chr10_93509330_93509831	-	chr10:93509329-93509831	Barretts	OAC	OK	9.98449	15.9111	0.672269	0.557903	0.2566	0.569347	no
chr10_93548213_93548714	chr10_93548213_93548714	-	chr10:93548212-93548714	Barretts	OAC	OK	30.8344	73.1192	1.24571	1.2141	0.01805	0.174496	no
chr10_93555974_93556475	chr10_93555974_93556475	-	chr10:93555973-93556475	Barretts	OAC	OK	58.7408	106.848	0.863121	1.03026	0.0395	0.246323	no
chr10_93557887_93558388	chr10_93557887_93558388	-	chr10:93557886-93558922	Barretts	OAC	OK	125.071	145.871	0.22194	0.266381	0.5893	0.812477	no
chr10_93558165_93558666	chr10_93558165_93558666	-	chr10:93557886-93558922	Barretts	OAC	OK	21.9749	43.3034	0.978625	0.523161	0.34515	0.651098	no
chr10_93558421_93558922	chr10_93558421_93558922	-	chr10:93557886-93558922	Barretts	OAC	OK	28.5897	43.2597	0.597525	0.338225	0.51425	0.768847	no
chr10_93623768_93624269	chr10_93623768_93624269	-	chr10:93623767-93624269	Barretts	OAC	OK	16.2735	10.8034	-0.591033	-0.475649	0.328	0.636363	no
chr10_93640024_93640525	chr10_93640024_93640525	-	chr10:93640023-93640525	Barretts	OAC	OK	29.999	19.3998	-0.628869	-0.633485	0.2141	0.526473	no
chr10_94157590_94158091	chr10_94157590_94158091	-	chr10:94157589-94158091	Barretts	OAC	OK	19.4395	5.68853	-1.77286	-1.18983	0.02905	0.21491	no
chr10_94172728_94173229	chr10_94172728_94173229	-	chr10:94172727-94173229	Barretts	OAC	OK	15.183	17.0004	0.163118	0.137656	0.78465	0.910982	no
chr10_94194731_94195232	chr10_94194731_94195232	-	chr10:94194730-94195232	Barretts	OAC	OK	26.7782	23.5951	-0.182568	-0.184728	0.71575	0.877755	no
chr10_94276741_94277242	chr10_94276741_94277242	-	chr10:94276740-94277242	Barretts	OAC	OK	43.7393	29.0176	-0.592002	-0.632963	0.2083	0.520681	no
chr10_94333035_94333536	chr10_94333035_94333536	-	chr10:94333034-94334546	Barretts	OAC	OK	36.9509	32.3194	-0.19321	-0.0956865	0.88425	0.952998	no
chr10_94333217_94333718	chr10_94333217_94333718	-	chr10:94333034-94334546	Barretts	OAC	OK	39.5687	51.2213	0.372386	0.211557	0.6786	0.858906	no
chr10_94333571_94334072	chr10_94333571_94334072	-	chr10:94333034-94334546	Barretts	OAC	OK	147.636	178.291	0.272191	0.325334	0.5114	0.767221	no
chr10_94334045_94334546	chr10_94334045_94334546	-	chr10:94333034-94334546	Barretts	OAC	OK	87.0112	103.531	0.250791	0.222044	0.6526	0.846111	no
chr10_94351230_94351731	chr10_94351230_94351731	-	chr10:94351229-94351731	Barretts	OAC	OK	211.268	306.961	0.538983	0.881014	0.0755	0.329168	no
chr10_94352541_94353042	chr10_94352541_94353042	-	chr10:94352540-94353501	Barretts	OAC	OK	156.962	241.193	0.619771	0.875794	0.08435	0.347479	no
chr10_94353000_94353501	chr10_94353000_94353501	-	chr10:94352540-94353501	Barretts	OAC	OK	29.9448	44.672	0.577065	0.300351	0.5867	0.811264	no
chr10_94404168_94404669	chr10_94404168_94404669	-	chr10:94404167-94404669	Barretts	OAC	OK	27.8862	28.2073	0.0165186	0.0168297	0.9689	0.986294	no
chr10_94448933_94449434	chr10_94448933_94449434	-	chr10:94448932-94449811	Barretts	OAC	OK	56.1078	63.602	0.18087	0.140706	0.7785	0.907495	no
chr10_94449310_94449811	chr10_94449310_94449811	-	chr10:94448932-94449811	Barretts	OAC	OK	114.077	171.504	0.58823	0.736157	0.1397	0.432527	no
chr10_94450008_94450509	chr10_94450008_94450509	-	chr10:94450007-94450509	Barretts	OAC	OK	69.6157	80.6389	0.212063	0.255708	0.6055	0.821792	no
chr10_94459117_94459618	chr10_94459117_94459618	-	chr10:94459116-94459618	Barretts	OAC	OK	44.9911	23.2096	-0.954916	-0.976257	0.0497	0.272458	no
chr10_94461982_94462483	chr10_94461982_94462483	-	chr10:94461981-94462483	Barretts	OAC	OK	17.6808	15.8267	-0.159821	-0.148668	0.77075	0.904037	no
chr10_94507309_94507810	chr10_94507309_94507810	-	chr10:94507308-94507810	Barretts	OAC	OK	46.9608	19.3576	-1.27856	-1.25238	0.01715	0.170336	no
chr10_94515983_94516484	chr10_94515983_94516484	-	chr10:94515982-94516484	Barretts	OAC	OK	35.2109	15.5867	-1.1757	-1.05883	0.0432	0.256315	no
chr10_94516766_94517267	chr10_94516766_94517267	-	chr10:94516765-94517267	Barretts	OAC	OK	66.433	27.9547	-1.24881	-1.33811	0.0082	0.126011	no
chr10_94547203_94547704	chr10_94547203_94547704	-	chr10:94547202-94547704	Barretts	OAC	OK	11.9695	8.19859	-0.545913	-0.411889	0.4033	0.695233	no
chr10_94569556_94570057	chr10_94569556_94570057	-	chr10:94569555-94570057	Barretts	OAC	OK	48.7997	58.7507	0.267733	0.288033	0.56075	0.798072	no
chr10_94588760_94589261	chr10_94588760_94589261	-	chr10:94588759-94589261	Barretts	OAC	OK	15.521	122.964	2.98594	3.14195	5e-05	0.00707764	yes
chr10_94602791_94603292	chr10_94602791_94603292	-	chr10:94602790-94603292	Barretts	OAC	OK	62.8715	52.5734	-0.258075	-0.291435	0.5645	0.799538	no
chr10_95008229_95008730	chr10_95008229_95008730	-	chr10:95008228-95009108	Barretts	OAC	OK	16.9617	5.57738	-1.60462	-0.847241	0.11005	0.391997	no
chr10_95008607_95009108	chr10_95008607_95009108	-	chr10:95008228-95009108	Barretts	OAC	OK	31.2014	11.8685	-1.39447	-1.14485	0.03985	0.247486	no
chr10_95013946_95014447	chr10_95013946_95014447	-	chr10:95013945-95014447	Barretts	OAC	OK	18.4694	8.31489	-1.15137	-0.905968	0.07575	0.329597	no
chr10_95048714_95049215	chr10_95048714_95049215	-	chr10:95048713-95049215	Barretts	OAC	OK	49.8923	46.4808	-0.102181	-0.116502	0.8112	0.923155	no
chr10_95093316_95093817	chr10_95093316_95093817	-	chr10:95093315-95093817	Barretts	OAC	OK	25.4601	4.60594	-2.46667	-1.71769	0.01465	0.158528	no
chr10_95094681_95095182	chr10_95094681_95095182	-	chr10:95094680-95095182	Barretts	OAC	OK	26.813	13.0881	-1.03468	-0.981932	0.06105	0.29807	no
chr10_95117374_95117875	chr10_95117374_95117875	-	chr10:95117373-95117875	Barretts	OAC	OK	30.0338	14.5463	-1.04593	-0.981927	0.0502	0.273734	no
chr10_95123627_95124128	chr10_95123627_95124128	-	chr10:95123626-95124128	Barretts	OAC	OK	23.2186	18.8826	-0.298228	-0.267486	0.58425	0.809741	no
chr10_95136064_95136565	chr10_95136064_95136565	-	chr10:95136063-95136565	Barretts	OAC	OK	45.2442	34.1182	-0.407193	-0.430042	0.3815	0.678201	no
chr10_95136585_95137086	chr10_95136585_95137086	-	chr10:95136584-95137086	Barretts	OAC	OK	27.2161	22.434	-0.278771	-0.256684	0.58745	0.811657	no
chr10_95143734_95144235	chr10_95143734_95144235	-	chr10:95143733-95144235	Barretts	OAC	OK	53.2786	70.2931	0.399826	0.461179	0.3352	0.64176	no
chr10_95172766_95173267	chr10_95172766_95173267	-	chr10:95172765-95173707	Barretts	OAC	OK	24.3227	17.5206	-0.473247	-0.353702	0.49505	0.758609	no
chr10_95173206_95173707	chr10_95173206_95173707	-	chr10:95172765-95173707	Barretts	OAC	OK	28.7818	11.6045	-1.31047	-0.823449	0.108	0.38843	no
chr10_95177204_95177705	chr10_95177204_95177705	-	chr10:95177203-95177705	Barretts	OAC	OK	22.993	21.3576	-0.106447	-0.101958	0.8324	0.932496	no
chr10_95184756_95185257	chr10_95184756_95185257	-	chr10:95184755-95185257	Barretts	OAC	OK	44.6404	93.1316	1.06092	1.23913	0.0176	0.172396	no
chr10_95185803_95186304	chr10_95185803_95186304	-	chr10:95185802-95186304	Barretts	OAC	OK	14.5871	34.2309	1.23061	1.11419	0.02745	0.209481	no
chr10_95196932_95197433	chr10_95196932_95197433	-	chr10:95196931-95197433	Barretts	OAC	OK	41.0614	96.9238	1.23907	1.45337	0.0054	0.104991	no
chr10_95198163_95198664	chr10_95198163_95198664	-	chr10:95198162-95199160	Barretts	OAC	OK	12.3622	34.7609	1.49152	0.828944	0.1639	0.465676	no
chr10_95198403_95198904	chr10_95198403_95198904	-	chr10:95198162-95199160	Barretts	OAC	OK	20.1609	47.9721	1.25064	0.646473	0.19215	0.500377	no
chr10_95198659_95199160	chr10_95198659_95199160	-	chr10:95198162-95199160	Barretts	OAC	OK	24.3124	48.9036	1.00825	0.608678	0.2712	0.584098	no
chr10_95205220_95205721	chr10_95205220_95205721	-	chr10:95205219-95205721	Barretts	OAC	OK	142.917	319.978	1.1628	1.78541	0.0006	0.0357149	yes
chr10_95218470_95218971	chr10_95218470_95218971	-	chr10:95218469-95218971	Barretts	OAC	OK	61.8807	159.575	1.36667	1.71864	0.0016	0.0597162	no
chr10_95225426_95225927	chr10_95225426_95225927	-	chr10:95225425-95226601	Barretts	OAC	OK	49.2434	140.175	1.50923	1.29958	0.0143	0.157232	no
chr10_95225729_95226230	chr10_95225729_95226230	-	chr10:95225425-95226601	Barretts	OAC	OK	35.5583	56.6174	0.671058	0.432238	0.39965	0.691956	no
chr10_95226100_95226601	chr10_95226100_95226601	-	chr10:95225425-95226601	Barretts	OAC	OK	72.3053	116.594	0.689317	0.650681	0.20395	0.515568	no
chr10_95230384_95230885	chr10_95230384_95230885	-	chr10:95230383-95230885	Barretts	OAC	OK	29.1496	51.2722	0.814702	0.865245	0.08115	0.341116	no
chr10_95235466_95235967	chr10_95235466_95235967	-	chr10:95235465-95236150	Barretts	OAC	OK	28.1838	98.1222	1.79971	1.17101	0.06575	0.30819	no
chr10_95235649_95236150	chr10_95235649_95236150	-	chr10:95235465-95236150	Barretts	OAC	OK	32.4148	47.7742	0.559577	0.347005	0.47325	0.74366	no
chr10_95241849_95242350	chr10_95241849_95242350	-	chr10:95241848-95243082	Barretts	OAC	OK	30.4426	39.9976	0.393823	0.293106	0.56645	0.800265	no
chr10_95242256_95242757	chr10_95242256_95242757	-	chr10:95241848-95243082	Barretts	OAC	OK	42.3787	27.7268	-0.612057	-0.424902	0.38005	0.677283	no
chr10_95242581_95243082	chr10_95242581_95243082	-	chr10:95241848-95243082	Barretts	OAC	OK	12.9809	26.0129	1.00283	0.42366	0.423	0.710036	no
chr10_95255642_95256143	chr10_95255642_95256143	-	chr10:95255641-95256517	Barretts	OAC	OK	34.7999	40.5069	0.219087	0.115803	0.82475	0.929184	no
chr10_95256016_95256517	chr10_95256016_95256517	-	chr10:95255641-95256517	Barretts	OAC	OK	230.687	271.728	0.236227	0.369713	0.4517	0.72911	no
chr10_95301679_95302180	chr10_95301679_95302180	-	chr10:95301678-95302648	Barretts	OAC	OK	38.174	47.232	0.307175	0.276226	0.5735	0.804383	no
chr10_95302147_95302648	chr10_95302147_95302648	-	chr10:95301678-95302648	Barretts	OAC	OK	27.4563	24.4216	-0.168981	-0.116916	0.81715	0.925706	no
chr10_95314491_95314992	chr10_95314491_95314992	-	chr10:95314490-95314992	Barretts	OAC	OK	47.4716	62.9058	0.406127	0.456725	0.37155	0.670647	no
chr10_95326116_95326617	chr10_95326116_95326617	-	chr10:95326115-95326895	Barretts	OAC	OK	36.3081	85.6177	1.23762	1.19909	0.0258	0.20303	no
chr10_95326394_95326895	chr10_95326394_95326895	-	chr10:95326115-95326895	Barretts	OAC	OK	25.3556	32.7973	0.371272	0.237599	0.6255	0.832171	no
chr10_95338751_95339252	chr10_95338751_95339252	-	chr10:95338750-95339252	Barretts	OAC	OK	78.3819	132.567	0.758126	0.988776	0.0457	0.262255	no
chr10_95351053_95351554	chr10_95351053_95351554	-	chr10:95351052-95351554	Barretts	OAC	OK	61.8591	61.411	-0.0104894	-0.0121544	0.9847	0.988927	no
chr10_95360459_95360960	chr10_95360459_95360960	-	chr10:95360458-95361373	Barretts	OAC	OK	38.2756	12.8659	-1.57287	-0.942026	0.1269	0.415116	no
chr10_95360872_95361373	chr10_95360872_95361373	-	chr10:95360458-95361373	Barretts	OAC	OK	54.4288	37.8167	-0.525347	-0.494688	0.3238	0.632586	no
chr10_95390859_95391360	chr10_95390859_95391360	-	chr10:95390858-95391360	Barretts	OAC	OK	34.6318	13.8788	-1.31921	-1.21994	0.02225	0.190741	no
chr10_95462111_95462612	chr10_95462111_95462612	-	chr10:95462110-95462911	Barretts	OAC	OK	109.163	166.247	0.606847	0.757503	0.1309	0.421665	no
chr10_95462410_95462911	chr10_95462410_95462911	-	chr10:95462110-95462911	Barretts	OAC	OK	50.9224	30.8621	-0.722468	-0.427379	0.4258	0.712059	no
chr10_95479042_95479543	chr10_95479042_95479543	-	chr10:95479041-95479543	Barretts	OAC	OK	17.8019	7.91416	-1.16952	-0.905851	0.07675	0.332536	no
chr10_95502354_95502855	chr10_95502354_95502855	-	chr10:95502353-95502855	Barretts	OAC	OK	26.0954	24.7838	-0.0743949	-0.0757937	0.8791	0.950295	no
chr10_95506440_95506941	chr10_95506440_95506941	-	chr10:95506439-95506941	Barretts	OAC	OK	32.1902	23.2989	-0.466362	-0.480362	0.3283	0.636458	no
chr10_95509085_95509586	chr10_95509085_95509586	-	chr10:95509084-95509586	Barretts	OAC	OK	43.1594	25.3135	-0.76977	-0.72918	0.12715	0.415349	no
chr10_95511555_95512056	chr10_95511555_95512056	-	chr10:95511554-95512056	Barretts	OAC	OK	23.9329	28.3398	0.243834	0.245012	0.6257	0.832211	no
chr10_95522627_95523128	chr10_95522627_95523128	-	chr10:95522626-95523128	Barretts	OAC	OK	17.417	13.933	-0.321987	-0.273604	0.586	0.810876	no
chr10_95561124_95561625	chr10_95561124_95561625	-	chr10:95561123-95561625	Barretts	OAC	OK	20.1478	7.42732	-1.43971	-1.1175	0.04085	0.250172	no
chr10_95573182_95573683	chr10_95573182_95573683	-	chr10:95573181-95573683	Barretts	OAC	OK	42.5389	34.3926	-0.306685	-0.329515	0.51335	0.768425	no
chr10_95575878_95576379	chr10_95575878_95576379	-	chr10:95575877-95576379	Barretts	OAC	OK	40.2512	22.3986	-0.845624	-0.841414	0.0902	0.356966	no
chr10_95597586_95598087	chr10_95597586_95598087	-	chr10:95597585-95598087	Barretts	OAC	OK	28.9847	14.3318	-1.01608	-0.856246	0.0896	0.356089	no
chr10_95616404_95616905	chr10_95616404_95616905	-	chr10:95616403-95616905	Barretts	OAC	OK	22.9562	19.7578	-0.216463	-0.15798	0.7288	0.88466	no
chr10_95624678_95625179	chr10_95624678_95625179	-	chr10:95624677-95625179	Barretts	OAC	OK	14.4338	6.58238	-1.13277	-0.828161	0.10635	0.385602	no
chr10_95631172_95631673	chr10_95631172_95631673	-	chr10:95631171-95632007	Barretts	OAC	OK	19.0039	28.6437	0.591923	0.431721	0.4161	0.704362	no
chr10_95631506_95632007	chr10_95631506_95632007	-	chr10:95631171-95632007	Barretts	OAC	OK	15.6186	44.8607	1.52219	1.14789	0.03085	0.220542	no
chr10_95653439_95653940	chr10_95653439_95653940	-	chr10:95653438-95654187	Barretts	OAC	OK	81.2152	85.0473	0.0665155	0.0707575	0.88965	0.955417	no
chr10_95653686_95654187	chr10_95653686_95654187	-	chr10:95653438-95654187	Barretts	OAC	OK	64.3084	40.9498	-0.651152	-0.511797	0.29275	0.604487	no
chr10_95676267_95676768	chr10_95676267_95676768	-	chr10:95676266-95677191	Barretts	OAC	OK	24.324	10.1046	-1.26737	-0.871949	0.08715	0.352421	no
chr10_95676690_95677191	chr10_95676690_95677191	-	chr10:95676266-95677191	Barretts	OAC	OK	21.4758	10.0986	-1.08856	-0.720088	0.18775	0.494429	no
chr10_95751478_95751979	chr10_95751478_95751979	-	chr10:95751477-95751979	Barretts	OAC	OK	61.1749	60.0003	-0.027972	-0.0330101	0.9444	0.979609	no
chr10_95753433_95753934	chr10_95753433_95753934	-	chr10:95753432-95754367	Barretts	OAC	OK	65.1539	111.316	0.772736	0.826785	0.09865	0.371962	no
chr10_95753656_95754157	chr10_95753656_95754157	-	chr10:95753432-95754367	Barretts	OAC	OK	16.5703	37.9329	1.19485	0.569857	0.3429	0.649079	no
chr10_95753866_95754367	chr10_95753866_95754367	-	chr10:95753432-95754367	Barretts	OAC	OK	24.9874	38.7222	0.631959	0.338802	0.50325	0.762749	no
chr10_95760319_95760820	chr10_95760319_95760820	-	chr10:95760318-95760820	Barretts	OAC	OK	25.4345	23.4889	-0.114811	-0.111295	0.82285	0.928248	no
chr10_95766851_95767352	chr10_95766851_95767352	-	chr10:95766850-95767352	Barretts	OAC	OK	75.7915	136.021	0.843722	1.10364	0.02425	0.197344	no
chr10_95777820_95778321	chr10_95777820_95778321	-	chr10:95777819-95778321	Barretts	OAC	OK	41.5125	24.2434	-0.775954	-0.804285	0.12115	0.407918	no
chr10_95801741_95802242	chr10_95801741_95802242	-	chr10:95801740-95802242	Barretts	OAC	OK	38.6372	26.2689	-0.556634	-0.56768	0.26185	0.575205	no
chr10_95835992_95836493	chr10_95835992_95836493	-	chr10:95835991-95836493	Barretts	OAC	OK	20.1584	10.6825	-0.916137	-0.799594	0.10925	0.390746	no
chr10_95843628_95844129	chr10_95843628_95844129	-	chr10:95843627-95844129	Barretts	OAC	OK	29.8436	8.19142	-1.86524	-1.45649	0.0063	0.112907	no
chr10_96066644_96067145	chr10_96066644_96067145	-	chr10:96066643-96067145	Barretts	OAC	OK	18.4661	3.86548	-2.25616	-1.31072	0.03245	0.225409	no
chr10_96122209_96122710	chr10_96122209_96122710	-	chr10:96122208-96122996	Barretts	OAC	OK	25.3533	40.0266	0.658785	0.34438	0.53765	0.784531	no
chr10_96122495_96122996	chr10_96122495_96122996	-	chr10:96122208-96122996	Barretts	OAC	OK	137.485	212.173	0.625971	0.888008	0.0781	0.335215	no
chr10_96140651_96141152	chr10_96140651_96141152	-	chr10:96140650-96141152	Barretts	OAC	OK	35.1841	33.1866	-0.0843208	-0.0865952	0.85955	0.94334	no
chr10_96161931_96162432	chr10_96161931_96162432	-	chr10:96161930-96163228	Barretts	OAC	OK	146.377	237.831	0.700248	0.897413	0.06925	0.315631	no
chr10_96162263_96162764	chr10_96162263_96162764	-	chr10:96161930-96163228	Barretts	OAC	OK	73.2053	71.0408	-0.0433004	-0.0339211	0.9469	0.980339	no
chr10_96162622_96163123	chr10_96162622_96163123	-	chr10:96161930-96163228	Barretts	OAC	OK	16.2345	29.6358	0.86828	0.255855	0.6756	0.857227	no
chr10_96162727_96163228	chr10_96162727_96163228	-	chr10:96161930-96163228	Barretts	OAC	OK	43.2024	28.9583	-0.577135	-0.301426	0.6367	0.838139	no
chr10_96163271_96163772	chr10_96163271_96163772	-	chr10:96163270-96163772	Barretts	OAC	OK	68.7963	93.9206	0.44911	0.557809	0.2684	0.581812	no
chr10_96304956_96305457	chr10_96304956_96305457	-	chr10:96304955-96306015	Barretts	OAC	OK	30.9233	39.4365	0.350837	0.201348	0.7086	0.874313	no
chr10_96305181_96305682	chr10_96305181_96305682	-	chr10:96304955-96306015	Barretts	OAC	OK	45.7566	55.6774	0.283112	0.173486	0.71705	0.878143	no
chr10_96305356_96305857	chr10_96305356_96305857	-	chr10:96304955-96306015	Barretts	OAC	OK	50.8898	38.341	-0.408488	-0.274985	0.6084	0.823705	no
chr10_96305514_96306015	chr10_96305514_96306015	-	chr10:96304955-96306015	Barretts	OAC	OK	31.1892	24.7321	-0.334661	-0.180995	0.7649	0.901211	no
chr10_96437385_96437886	chr10_96437385_96437886	-	chr10:96437384-96437886	Barretts	OAC	OK	43.5666	32.9942	-0.401007	-0.434083	0.3898	0.684223	no
chr10_96440256_96440757	chr10_96440256_96440757	-	chr10:96440255-96440757	Barretts	OAC	OK	48.7991	100.375	1.04047	1.27095	0.01105	0.14136	no
chr10_96442328_96442829	chr10_96442328_96442829	-	chr10:96442327-96442829	Barretts	OAC	OK	28.7906	39.3891	0.452196	0.468736	0.3487	0.653709	no
chr10_96442984_96443485	chr10_96442984_96443485	-	chr10:96442983-96443485	Barretts	OAC	OK	34.923	36.2739	0.0547563	0.0586904	0.90965	0.964668	no
chr10_96522107_96522608	chr10_96522107_96522608	-	chr10:96522106-96522608	Barretts	OAC	OK	19.406	21.9069	0.174881	0.161674	0.7516	0.89502	no
chr10_96537790_96538291	chr10_96537790_96538291	-	chr10:96537789-96538291	Barretts	OAC	OK	33.2748	39.2293	0.237505	0.24131	0.62775	0.833251	no
chr10_96662331_96662832	chr10_96662331_96662832	-	chr10:96662330-96662832	Barretts	OAC	OK	55.2055	48.2591	-0.19401	-0.214741	0.6684	0.853284	no
chr10_970372_970873	chr10_970372_970873	-	chr10:970371-970873	Barretts	OAC	OK	24.2242	29.6365	0.290928	0.283193	0.58015	0.807692	no
chr10_970900_971401	chr10_970900_971401	-	chr10:970899-971401	Barretts	OAC	NOTEST	11.0216	11.8726	0.107305	0	1	1	no
chr10_972168_972669	chr10_972168_972669	-	chr10:972167-972669	Barretts	OAC	OK	32.5283	28.3014	-0.200822	-0.208213	0.6726	0.85576	no
chr10_976520_977021	chr10_976520_977021	-	chr10:976519-977361	Barretts	OAC	OK	50.9252	88.089	0.790583	0.736538	0.1492	0.445922	no
chr10_976860_977361	chr10_976860_977361	-	chr10:976519-977361	Barretts	OAC	OK	51.6553	63.5739	0.299517	0.260988	0.60145	0.818977	no
chr10_977515_978016	chr10_977515_978016	-	chr10:977514-978387	Barretts	OAC	OK	329.12	544.389	0.726026	1.1954	0.0165	0.167365	no
chr10_977886_978387	chr10_977886_978387	-	chr10:977514-978387	Barretts	OAC	OK	52.3408	124.021	1.24457	0.823685	0.13055	0.421005	no
chr10_984840_985341	chr10_984840_985341	-	chr10:984839-985341	Barretts	OAC	OK	16.1912	19.3054	0.253799	0.226337	0.6394	0.839404	no
chr10_989967_990468	chr10_989967_990468	-	chr10:989966-990948	Barretts	OAC	OK	16.49	20.9062	0.342338	0.158655	0.7957	0.916659	no
chr10_990296_990797	chr10_990296_990797	-	chr10:989966-990948	Barretts	OAC	OK	61.4383	61.4311	-0.000169017	-0.000154241	0.9883	0.989828	no
chr10_990447_990948	chr10_990447_990948	-	chr10:989966-990948	Barretts	OAC	OK	9.52882	26.862	1.4952	0.684004	0.2983	0.609589	no
chr11_102470237_102470738	chr11_102470237_102470738	-	chr11:102470236-102471006	Barretts	OAC	OK	48.7375	65.7491	0.431939	0.379201	0.44435	0.724602	no
chr11_102470505_102471006	chr11_102470505_102471006	-	chr11:102470236-102471006	Barretts	OAC	OK	25.2826	60.4239	1.25698	0.887826	0.0974	0.370148	no
chr11_102473796_102474297	chr11_102473796_102474297	-	chr11:102473795-102474297	Barretts	OAC	OK	36.4293	39.9875	0.134451	0.145659	0.77255	0.904899	no
chr11_102477900_102478401	chr11_102477900_102478401	-	chr11:102477899-102478401	Barretts	OAC	OK	19.4743	7.8718	-1.30681	-1.0272	0.05595	0.287698	no
chr11_102483636_102484137	chr11_102483636_102484137	-	chr11:102483635-102484137	Barretts	OAC	OK	46.8898	41.8185	-0.165132	-0.179701	0.72515	0.882661	no
chr11_102486159_102486660	chr11_102486159_102486660	-	chr11:102486158-102486660	Barretts	OAC	OK	25.3877	22.9751	-0.144057	-0.142387	0.7776	0.907241	no
chr11_102492993_102493494	chr11_102492993_102493494	-	chr11:102492992-102493494	Barretts	OAC	OK	24.5441	28.3528	0.208117	0.201276	0.67955	0.859328	no
chr11_102494672_102495173	chr11_102494672_102495173	-	chr11:102494671-102495173	Barretts	OAC	OK	15.594	15.9089	0.0288461	0.0273142	0.9528	0.982103	no
chr11_102501267_102501768	chr11_102501267_102501768	-	chr11:102501266-102501768	Barretts	OAC	OK	17.4671	16.2608	-0.103247	-0.0892336	0.85705	0.94229	no
chr11_102511519_102512020	chr11_102511519_102512020	-	chr11:102511518-102512020	Barretts	OAC	OK	22.5806	14.9042	-0.599371	-0.547828	0.2706	0.583385	no
chr11_102537001_102537502	chr11_102537001_102537502	-	chr11:102537000-102537502	Barretts	OAC	OK	35.1031	19.32	-0.861503	-0.870407	0.08855	0.354465	no
chr11_102553962_102554463	chr11_102553962_102554463	-	chr11:102553961-102554463	Barretts	OAC	OK	26.2881	14.6638	-0.842157	-0.795689	0.10755	0.387973	no
chr11_102603923_102604424	chr11_102603923_102604424	-	chr11:102603922-102604424	Barretts	OAC	OK	40.0531	44.265	0.144251	0.160741	0.74075	0.89032	no
chr11_102617395_102617896	chr11_102617395_102617896	-	chr11:102617394-102618289	Barretts	OAC	OK	8.93864	31.5303	1.81861	0.946482	0.0492	0.27134	no
chr11_102617788_102618289	chr11_102617788_102618289	-	chr11:102617394-102618289	Barretts	OAC	OK	16.3037	43.5335	1.41692	1.08317	0.0658	0.308217	no
chr11_102647157_102647658	chr11_102647157_102647658	-	chr11:102647156-102647658	Barretts	OAC	NOTEST	11.8135	9.4753	-0.318192	0	1	1	no
chr11_102651102_102651603	chr11_102651102_102651603	-	chr11:102651101-102651603	Barretts	OAC	OK	34.2161	36.4669	0.0919151	0.0966197	0.8497	0.939399	no
chr11_102654418_102654919	chr11_102654418_102654919	-	chr11:102654417-102655037	Barretts	OAC	OK	40.1837	32.6673	-0.298764	-0.19131	0.70005	0.870115	no
chr11_102654536_102655037	chr11_102654536_102655037	-	chr11:102654417-102655037	Barretts	OAC	OK	25.6734	15.0237	-0.773032	-0.322513	0.52245	0.774555	no
chr11_102664299_102664800	chr11_102664299_102664800	-	chr11:102664298-102665411	Barretts	OAC	OK	72.8217	46.5397	-0.645905	-0.472737	0.36185	0.664085	no
chr11_102664645_102665146	chr11_102664645_102665146	-	chr11:102664298-102665411	Barretts	OAC	OK	76.2548	43.2189	-0.819164	-0.638984	0.21675	0.52877	no
chr11_102664910_102665411	chr11_102664910_102665411	-	chr11:102664298-102665411	Barretts	OAC	OK	24.052	43.9969	0.871244	0.441092	0.368	0.668013	no
chr11_102668648_102669149	chr11_102668648_102669149	-	chr11:102668647-102669512	Barretts	OAC	OK	53.2481	103.257	0.955434	0.960473	0.05875	0.292842	no
chr11_102669011_102669512	chr11_102669011_102669512	-	chr11:102668647-102669512	Barretts	OAC	OK	32.297	40.6943	0.333428	0.224042	0.6847	0.861834	no
chr11_102678634_102679135	chr11_102678634_102679135	-	chr11:102678633-102679135	Barretts	OAC	OK	101.633	161.009	0.66377	0.880312	0.08035	0.339639	no
chr11_102690185_102690686	chr11_102690185_102690686	-	chr11:102690184-102690686	Barretts	OAC	OK	54.0035	66.234	0.294518	0.342486	0.4847	0.751747	no
chr11_102702029_102702530	chr11_102702029_102702530	-	chr11:102702028-102702530	Barretts	OAC	OK	19.3277	33.227	0.78169	0.709865	0.15225	0.450246	no
chr11_102703269_102703770	chr11_102703269_102703770	-	chr11:102703268-102703770	Barretts	OAC	OK	21.7572	24.8128	0.189595	0.165338	0.742	0.890961	no
chr11_102724653_102725154	chr11_102724653_102725154	-	chr11:102724652-102725154	Barretts	OAC	OK	59.4819	117.689	0.984451	1.22031	0.01625	0.166478	no
chr11_102734137_102734638	chr11_102734137_102734638	-	chr11:102734136-102734638	Barretts	OAC	OK	15.9214	18.8763	0.245608	0.216132	0.66105	0.850166	no
chr11_102753364_102753865	chr11_102753364_102753865	-	chr11:102753363-102753865	Barretts	OAC	OK	19.1469	25.9243	0.437194	0.405367	0.4302	0.715017	no
chr11_102776556_102777057	chr11_102776556_102777057	-	chr11:102776555-102777057	Barretts	OAC	OK	23.2962	29.0968	0.320764	0.310212	0.51895	0.772112	no
chr11_102785421_102785922	chr11_102785421_102785922	-	chr11:102785420-102785922	Barretts	OAC	OK	44.2045	35.026	-0.335768	-0.361611	0.46875	0.740196	no
chr11_102800644_102801145	chr11_102800644_102801145	-	chr11:102800643-102801145	Barretts	OAC	OK	58.1001	34.7748	-0.740499	-0.777247	0.11485	0.39802	no
chr11_102811663_102812164	chr11_102811663_102812164	-	chr11:102811662-102812164	Barretts	OAC	OK	44.8117	39.6651	-0.176004	-0.191765	0.6873	0.863079	no
chr11_102816976_102817477	chr11_102816976_102817477	-	chr11:102816975-102817477	Barretts	OAC	OK	18.5892	12.2855	-0.597511	-0.52679	0.2766	0.588767	no
chr11_102845599_102846100	chr11_102845599_102846100	-	chr11:102845598-102846100	Barretts	OAC	OK	76.6178	51.1059	-0.584188	-0.668423	0.18405	0.490321	no
chr11_102866929_102867430	chr11_102866929_102867430	-	chr11:102866928-102867430	Barretts	OAC	OK	29.5759	37.3222	0.335612	0.352772	0.46915	0.740492	no
chr11_102906632_102907133	chr11_102906632_102907133	-	chr11:102906631-102907133	Barretts	OAC	OK	48.8492	56.9348	0.220976	0.24886	0.62365	0.831104	no
chr11_102915249_102915750	chr11_102915249_102915750	-	chr11:102915248-102915750	Barretts	OAC	OK	8.22712	17.8894	1.12065	0.843405	0.0959	0.367617	no
chr11_102940034_102940535	chr11_102940034_102940535	-	chr11:102940033-102940535	Barretts	OAC	OK	30.0231	29.5494	-0.0229444	-0.0235168	0.96955	0.986408	no
chr11_102962112_102962613	chr11_102962112_102962613	-	chr11:102962111-102962613	Barretts	OAC	OK	52.49	67.6916	0.366934	0.425382	0.3898	0.684223	no
chr11_102962665_102963166	chr11_102962665_102963166	-	chr11:102962664-102963523	Barretts	OAC	OK	262.705	400.836	0.609568	1.00402	0.04275	0.255473	no
chr11_102963022_102963523	chr11_102963022_102963523	-	chr11:102962664-102963523	Barretts	OAC	OK	24.2577	50.2937	1.05194	0.523195	0.4331	0.71724	no
chr11_102979595_102980096	chr11_102979595_102980096	-	chr11:102979594-102980706	Barretts	OAC	OK	52.8148	47.0573	-0.166523	-0.0978723	0.84675	0.937656	no
chr11_102979875_102980376	chr11_102979875_102980376	-	chr11:102979594-102980706	Barretts	OAC	OK	189.303	248.039	0.389873	0.5279	0.2939	0.605385	no
chr11_102980205_102980706	chr11_102980205_102980706	-	chr11:102979594-102980706	Barretts	OAC	OK	49.7879	54.6522	0.134484	0.0788823	0.8872	0.954375	no
chr11_10314905_10315406	chr11_10314905_10315406	-	chr11:10314904-10316036	Barretts	OAC	OK	69.099	147.502	1.094	1.02707	0.0408	0.250086	no
chr11_10315249_10315750	chr11_10315249_10315750	-	chr11:10314904-10316036	Barretts	OAC	OK	44.4746	101	1.1833	0.865301	0.11635	0.399969	no
chr11_10315535_10316036	chr11_10315535_10316036	-	chr11:10314904-10316036	Barretts	OAC	OK	46.4911	68.0763	0.550199	0.386458	0.4367	0.719841	no
chr11_10324261_10324762	chr11_10324261_10324762	-	chr11:10324260-10324762	Barretts	OAC	OK	81.1915	126.934	0.644675	0.838357	0.09085	0.35783	no
chr11_10325312_10325813	chr11_10325312_10325813	-	chr11:10325311-10325813	Barretts	OAC	OK	47.4014	87.5413	0.885035	1.03967	0.0412	0.251073	no
chr11_10326125_10326626	chr11_10326125_10326626	-	chr11:10326124-10326813	Barretts	OAC	OK	60.9606	130.853	1.102	1.10124	0.0315	0.222223	no
chr11_10326312_10326813	chr11_10326312_10326813	-	chr11:10326124-10326813	Barretts	OAC	OK	60.7069	141.105	1.21683	1.2435	0.0193	0.179026	no
chr11_10328772_10329273	chr11_10328772_10329273	-	chr11:10328771-10329979	Barretts	OAC	OK	56.1942	139.845	1.31534	1.17266	0.0305	0.219164	no
chr11_10329255_10329756	chr11_10329255_10329756	-	chr11:10328771-10329979	Barretts	OAC	OK	74.9575	144.334	0.945261	0.936653	0.068	0.313504	no
chr11_10329478_10329979	chr11_10329478_10329979	-	chr11:10328771-10329979	Barretts	OAC	OK	53.34	82.2276	0.624405	0.491523	0.3325	0.639933	no
chr11_10330623_10331124	chr11_10330623_10331124	-	chr11:10330622-10331124	Barretts	OAC	OK	47.8706	73.0202	0.609157	0.703462	0.15845	0.45842	no
chr11_10339117_10339618	chr11_10339117_10339618	-	chr11:10339116-10339618	Barretts	OAC	OK	24.9385	21.6464	-0.20425	-0.1991	0.6859	0.862409	no
chr11_10339951_10340452	chr11_10339951_10340452	-	chr11:10339950-10340452	Barretts	OAC	OK	17.6078	15.0744	-0.224114	-0.203027	0.67655	0.857776	no
chr11_10344347_10344848	chr11_10344347_10344848	-	chr11:10344346-10344848	Barretts	OAC	OK	53.5201	67.8197	0.341623	0.398576	0.42775	0.71391	no
chr11_10347900_10348401	chr11_10347900_10348401	-	chr11:10347899-10348401	Barretts	OAC	OK	64.8188	112.758	0.798743	1.00101	0.04055	0.24952	no
chr11_10370185_10370686	chr11_10370185_10370686	-	chr11:10370184-10370686	Barretts	OAC	OK	17.2804	9.28745	-0.895781	-0.761661	0.1369	0.42866	no
chr11_10373195_10373696	chr11_10373195_10373696	-	chr11:10373194-10373696	Barretts	OAC	OK	42.3776	99.1191	1.22586	1.39024	0.0066	0.11497	no
chr11_10387914_10388415	chr11_10387914_10388415	-	chr11:10387913-10388941	Barretts	OAC	OK	25.854	32.2214	0.317631	0.183828	0.7352	0.887942	no
chr11_10388104_10388605	chr11_10388104_10388605	-	chr11:10387913-10388941	Barretts	OAC	OK	46.1108	68.668	0.574531	0.489867	0.31935	0.62893	no
chr11_10388440_10388941	chr11_10388440_10388941	-	chr11:10387913-10388941	Barretts	OAC	OK	28.7637	21.7207	-0.405179	-0.219815	0.6711	0.854758	no
chr11_104005460_104005961	chr11_104005460_104005961	-	chr11:104005459-104005961	Barretts	OAC	OK	22.7385	35.8995	0.658825	0.65282	0.1826	0.488965	no
chr11_104034609_104035110	chr11_104034609_104035110	-	chr11:104034608-104035250	Barretts	OAC	OK	44.7864	33.799	-0.406079	-0.209314	0.66235	0.850333	no
chr11_104034749_104035250	chr11_104034749_104035250	-	chr11:104034608-104035250	Barretts	OAC	OK	90.9455	133.028	0.548653	0.595285	0.2353	0.547592	no
chr11_10404005_10404506	chr11_10404005_10404506	-	chr11:10404004-10404506	Barretts	OAC	OK	27.0313	57.2828	1.08347	1.13279	0.0252	0.200621	no
chr11_10409293_10409794	chr11_10409293_10409794	-	chr11:10409292-10409794	Barretts	OAC	OK	21.4325	20.3856	-0.0722444	-0.0688317	0.88375	0.952724	no
chr11_10419994_10420495	chr11_10419994_10420495	-	chr11:10419993-10420495	Barretts	OAC	OK	25.839	18.7252	-0.464571	-0.441314	0.3827	0.679086	no
chr11_10427660_10428161	chr11_10427660_10428161	-	chr11:10427659-10428161	Barretts	OAC	OK	47.7527	42.255	-0.17646	-0.199907	0.68305	0.86091	no
chr11_10429271_10429772	chr11_10429271_10429772	-	chr11:10429270-10429772	Barretts	OAC	OK	28.1218	14.6497	-0.940818	-0.855451	0.08765	0.353089	no
chr11_10434787_10435288	chr11_10434787_10435288	-	chr11:10434786-10435288	Barretts	OAC	OK	29.7219	36.9852	0.315424	0.326434	0.51325	0.768408	no
chr11_10436144_10436645	chr11_10436144_10436645	-	chr11:10436143-10436645	Barretts	OAC	OK	39.4165	15.3157	-1.36379	-1.30627	0.01475	0.159115	no
chr11_10436678_10437179	chr11_10436678_10437179	-	chr11:10436677-10437179	Barretts	OAC	OK	23.2508	20.3353	-0.193291	-0.185078	0.712	0.876024	no
chr11_10471944_10472445	chr11_10471944_10472445	-	chr11:10471943-10473061	Barretts	OAC	OK	57.7413	63.9099	0.146437	0.107965	0.8395	0.935211	no
chr11_10472195_10472696	chr11_10472195_10472696	-	chr11:10471943-10473061	Barretts	OAC	OK	11.0567	27.1382	1.2954	0.373328	0.4579	0.733238	no
chr11_10472389_10472890	chr11_10472389_10472890	-	chr11:10471943-10473061	Barretts	OAC	OK	45.9115	68.0583	0.567915	0.34346	0.54495	0.78864	no
chr11_10472560_10473061	chr11_10472560_10473061	-	chr11:10471943-10473061	Barretts	OAC	OK	72.7652	80.0967	0.138495	0.107068	0.82585	0.929408	no
chr11_10476297_10476798	chr11_10476297_10476798	-	chr11:10476296-10476798	Barretts	OAC	OK	35.7352	29.5373	-0.274808	-0.284394	0.56645	0.800265	no
chr11_10477306_10477807	chr11_10477306_10477807	-	chr11:10477305-10478092	Barretts	OAC	OK	78.8853	48.8706	-0.690791	-0.648015	0.2063	0.518497	no
chr11_10477591_10478092	chr11_10477591_10478092	-	chr11:10477305-10478092	Barretts	OAC	OK	47.5769	30.056	-0.662607	-0.445618	0.3647	0.665701	no
chr11_10509641_10510142	chr11_10509641_10510142	-	chr11:10509640-10510142	Barretts	OAC	OK	84.9895	136.874	0.687497	0.890035	0.0842	0.347189	no
chr11_10510638_10511139	chr11_10510638_10511139	-	chr11:10510637-10511409	Barretts	OAC	OK	160.731	213.908	0.412346	0.512792	0.29425	0.605676	no
chr11_10510908_10511409	chr11_10510908_10511409	-	chr11:10510637-10511409	Barretts	OAC	OK	73.7124	100.063	0.440929	0.358317	0.5123	0.76772	no
chr11_10525857_10526358	chr11_10525857_10526358	-	chr11:10525856-10526358	Barretts	OAC	OK	18.4279	10.1035	-0.867041	-0.678266	0.1699	0.47368	no
chr11_10548757_10549258	chr11_10548757_10549258	-	chr11:10548756-10549258	Barretts	OAC	OK	20.6109	41.0043	0.992364	0.991032	0.0486	0.269568	no
chr11_10562033_10562534	chr11_10562033_10562534	-	chr11:10562032-10563052	Barretts	OAC	OK	33.7594	43.0179	0.349647	0.162013	0.75115	0.894945	no
chr11_10562265_10562766	chr11_10562265_10562766	-	chr11:10562032-10563052	Barretts	OAC	OK	55.0613	92.6912	0.751393	0.570499	0.25915	0.572016	no
chr11_10562551_10563052	chr11_10562551_10563052	-	chr11:10562032-10563052	Barretts	OAC	OK	167.032	231.157	0.468749	0.61105	0.23345	0.545987	no
chr11_10578173_10578674	chr11_10578173_10578674	-	chr11:10578172-10578674	Barretts	OAC	OK	15.0645	13.6794	-0.139148	-0.124021	0.8117	0.923479	no
chr11_10582527_10583028	chr11_10582527_10583028	-	chr11:10582526-10583028	Barretts	OAC	OK	29.3845	55.8242	0.925834	0.96433	0.06165	0.299453	no
chr11_10603194_10603695	chr11_10603194_10603695	-	chr11:10603193-10603695	Barretts	OAC	OK	23.0627	19.5365	-0.239383	-0.227439	0.6477	0.842738	no
chr11_10608048_10608549	chr11_10608048_10608549	-	chr11:10608047-10608549	Barretts	OAC	OK	22.4287	19.426	-0.207356	-0.198015	0.6842	0.861484	no
chr11_10615977_10616478	chr11_10615977_10616478	-	chr11:10615976-10616478	Barretts	OAC	OK	27.2489	24.0611	-0.179495	-0.165663	0.7472	0.893264	no
chr11_10625859_10626360	chr11_10625859_10626360	-	chr11:10625858-10626360	Barretts	OAC	OK	21.4928	15.4304	-0.478078	-0.454098	0.37425	0.672835	no
chr11_10650033_10650534	chr11_10650033_10650534	-	chr11:10650032-10650534	Barretts	OAC	OK	36.92	8.96896	-2.04139	-1.76588	0.00345	0.0863666	no
chr11_10654784_10655285	chr11_10654784_10655285	-	chr11:10654783-10655285	Barretts	OAC	OK	16.0144	5.36337	-1.57816	-0.999336	0.05525	0.285787	no
chr11_10669014_10669515	chr11_10669014_10669515	-	chr11:10669013-10669515	Barretts	OAC	OK	25.6937	12.7388	-1.01219	-0.938564	0.0562	0.288048	no
chr11_10681208_10681709	chr11_10681208_10681709	-	chr11:10681207-10681709	Barretts	OAC	OK	34.3179	36.2915	0.080674	0.085729	0.86235	0.944236	no
chr11_10690676_10691177	chr11_10690676_10691177	-	chr11:10690675-10691177	Barretts	OAC	OK	20.9062	12.1824	-0.779136	-0.674449	0.1867	0.493417	no
chr11_10696058_10696559	chr11_10696058_10696559	-	chr11:10696057-10697189	Barretts	OAC	OK	24.9981	18.3837	-0.443392	-0.266384	0.5987	0.817374	no
chr11_10696321_10696822	chr11_10696321_10696822	-	chr11:10696057-10697189	Barretts	OAC	OK	22.479	16.4964	-0.446428	-0.258778	0.705	0.872809	no
chr11_10696688_10697189	chr11_10696688_10697189	-	chr11:10696057-10697189	Barretts	OAC	OK	19.6581	13.9083	-0.499176	-0.222045	0.6321	0.835554	no
chr11_10709840_10710341	chr11_10709840_10710341	-	chr11:10709839-10710341	Barretts	OAC	OK	21.9098	9.23552	-1.24631	-0.996948	0.0538	0.282995	no
chr11_10724927_10725428	chr11_10724927_10725428	-	chr11:10724926-10725428	Barretts	OAC	OK	14.4311	4.83804	-1.57669	-1.07584	0.0696	0.316233	no
chr11_10743698_10744199	chr11_10743698_10744199	-	chr11:10743697-10744199	Barretts	OAC	OK	19.6476	8.21092	-1.25874	-0.990976	0.07125	0.31956	no
chr11_10757219_10757720	chr11_10757219_10757720	-	chr11:10757218-10758066	Barretts	OAC	OK	129.662	181.544	0.48556	0.640287	0.19895	0.509693	no
chr11_10757565_10758066	chr11_10757565_10758066	-	chr11:10757218-10758066	Barretts	OAC	OK	50.2833	68.3567	0.443004	0.34209	0.49645	0.759318	no
chr11_10772273_10772774	chr11_10772273_10772774	-	chr11:10772272-10773005	Barretts	OAC	OK	61.3446	124.1	1.0165	0.841539	0.0901	0.356814	no
chr11_10772504_10773005	chr11_10772504_10773005	-	chr11:10772272-10773005	Barretts	OAC	OK	117.113	190.621	0.702804	0.83907	0.1058	0.384649	no
chr11_10806152_10806653	chr11_10806152_10806653	-	chr11:10806151-10806653	Barretts	OAC	OK	22.6549	7.33628	-1.6267	-1.32356	0.01735	0.171539	no
chr11_108288243_108288744	chr11_108288243_108288744	-	chr11:108288242-108288744	Barretts	OAC	OK	31.599	37.7915	0.258183	0.278689	0.5689	0.801709	no
chr11_108311516_108312017	chr11_108311516_108312017	-	chr11:108311515-108312296	Barretts	OAC	OK	29.8873	41.8012	0.484012	0.370827	0.4618	0.735324	no
chr11_108311795_108312296	chr11_108311795_108312296	-	chr11:108311515-108312296	Barretts	OAC	OK	17.9818	31.993	0.831219	0.479678	0.3433	0.649144	no
chr11_108337711_108338212	chr11_108337711_108338212	-	chr11:108337710-108338473	Barretts	OAC	OK	63.4934	127.398	1.00466	0.742522	0.14675	0.441976	no
chr11_108337972_108338473	chr11_108337972_108338473	-	chr11:108337710-108338473	Barretts	OAC	OK	305.3	487.452	0.675031	1.12706	0.0255	0.201838	no
chr11_108367880_108368381	chr11_108367880_108368381	-	chr11:108367879-108368795	Barretts	OAC	OK	34.3801	33.3124	-0.0455119	-0.0246091	0.96475	0.985973	no
chr11_108368294_108368795	chr11_108368294_108368795	-	chr11:108367879-108368795	Barretts	OAC	OK	155.159	182.928	0.237532	0.329896	0.50505	0.76365	no
chr11_108368839_108369340	chr11_108368839_108369340	-	chr11:108368838-108369592	Barretts	OAC	OK	47.2454	58.882	0.317653	0.276834	0.5857	0.810691	no
chr11_108369091_108369592	chr11_108369091_108369592	-	chr11:108368838-108369592	Barretts	OAC	OK	54.2109	44.3063	-0.291073	-0.236117	0.62765	0.833214	no
chr11_108379903_108380404	chr11_108379903_108380404	-	chr11:108379902-108380404	Barretts	OAC	OK	19.2547	12.8551	-0.582875	-0.535237	0.2946	0.605976	no
chr11_108408732_108409233	chr11_108408732_108409233	-	chr11:108408731-108409233	Barretts	OAC	OK	55.6846	99.8677	0.842739	0.981227	0.05275	0.280565	no
chr11_108420588_108421089	chr11_108420588_108421089	-	chr11:108420587-108421089	Barretts	OAC	OK	29.0544	17.4171	-0.738249	-0.653884	0.1738	0.478916	no
chr11_108422151_108422652	chr11_108422151_108422652	-	chr11:108422150-108423053	Barretts	OAC	OK	19.1018	14.7293	-0.375026	-0.186883	0.7017	0.870829	no
chr11_108422401_108422902	chr11_108422401_108422902	-	chr11:108422150-108423053	Barretts	OAC	NOTEST	9.55087	7.02574	-0.442982	0	1	1	no
chr11_108422552_108423053	chr11_108422552_108423053	-	chr11:108422150-108423053	Barretts	OAC	OK	40.3095	34.7329	-0.214817	-0.170639	0.7367	0.888521	no
chr11_108441626_108442127	chr11_108441626_108442127	-	chr11:108441625-108442127	Barretts	OAC	OK	65.3276	22.085	-1.56463	-1.68889	0.00225	0.0700801	no
chr11_108442555_108443056	chr11_108442555_108443056	-	chr11:108442554-108443056	Barretts	OAC	NOTEST	12.3504	11.6669	-0.0821368	0	1	1	no
chr11_108457335_108457836	chr11_108457335_108457836	-	chr11:108457334-108457836	Barretts	OAC	OK	54.252	47.8415	-0.181413	-0.204068	0.6708	0.85475	no
chr11_108463503_108464004	chr11_108463503_108464004	-	chr11:108463502-108464788	Barretts	OAC	OK	56.8187	59.6758	0.070781	0.0314285	0.96225	0.984981	no
chr11_108463865_108464366	chr11_108463865_108464366	-	chr11:108463502-108464788	Barretts	OAC	OK	59.1548	77.0574	0.381438	0.182332	0.7619	0.899809	no
chr11_108464287_108464788	chr11_108464287_108464788	-	chr11:108463502-108464788	Barretts	OAC	OK	498.631	797.022	0.676648	1.15895	0.02055	0.184146	no
chr11_108487286_108487787	chr11_108487286_108487787	-	chr11:108487285-108487787	Barretts	OAC	OK	26.3833	63.1332	1.25877	1.31901	0.01265	0.150289	no
chr11_108491565_108492066	chr11_108491565_108492066	-	chr11:108491564-108492066	Barretts	OAC	OK	20.6471	34.348	0.734286	0.71285	0.1549	0.454073	no
chr11_108494863_108495364	chr11_108494863_108495364	-	chr11:108494862-108495364	Barretts	OAC	OK	30.894	23.4214	-0.399501	-0.374978	0.4389	0.721473	no
chr11_108518719_108519220	chr11_108518719_108519220	-	chr11:108518718-108519442	Barretts	OAC	OK	20.3665	15.9394	-0.353601	-0.171477	0.7422	0.891049	no
chr11_108518941_108519442	chr11_108518941_108519442	-	chr11:108518718-108519442	Barretts	OAC	OK	52.683	53.4562	0.0210203	0.0205219	0.96815	0.986294	no
chr11_108525627_108526128	chr11_108525627_108526128	-	chr11:108525626-108526128	Barretts	OAC	OK	25.3923	23.6496	-0.102578	-0.0997039	0.84405	0.936832	no
chr11_108535421_108535922	chr11_108535421_108535922	-	chr11:108535420-108535922	Barretts	OAC	OK	281.831	406.795	0.529472	0.918548	0.05895	0.293293	no
chr11_108540426_108540927	chr11_108540426_108540927	-	chr11:108540425-108540927	Barretts	OAC	OK	37.5393	53.1545	0.501791	0.518199	0.31425	0.624361	no
chr11_108568537_108569038	chr11_108568537_108569038	-	chr11:108568536-108569038	Barretts	OAC	OK	43.7191	41.3073	-0.0818651	-0.0885119	0.8584	0.942881	no
chr11_108766518_108767019	chr11_108766518_108767019	-	chr11:108766517-108767019	Barretts	OAC	OK	32.5665	48.4696	0.573693	0.610349	0.22455	0.536789	no
chr11_1108572_1109073	chr11_1108572_1109073	-	chr11:1108571-1109073	Barretts	OAC	OK	66.8475	88.6536	0.407305	0.507484	0.3095	0.620997	no
chr11_1112924_1113425	chr11_1112924_1113425	-	chr11:1112923-1113563	Barretts	OAC	OK	90.3519	46.1347	-0.969703	-0.774725	0.2554	0.568059	no
chr11_1113062_1113563	chr11_1113062_1113563	-	chr11:1112923-1113563	Barretts	OAC	OK	53.6476	40.3743	-0.410077	-0.239975	0.55375	0.793722	no
chr11_1122012_1122513	chr11_1122012_1122513	-	chr11:1122011-1122513	Barretts	OAC	OK	56.1928	43.5646	-0.367229	-0.388554	0.42085	0.70834	no
chr11_1123542_1124043	chr11_1123542_1124043	-	chr11:1123541-1124043	Barretts	OAC	OK	131.954	92.2158	-0.516946	-0.633768	0.2037	0.51531	no
chr11_1125238_1125739	chr11_1125238_1125739	-	chr11:1125237-1125739	Barretts	OAC	OK	33.3444	33.2298	-0.00496939	-0.00480354	0.97585	0.987045	no
chr11_1133348_1133849	chr11_1133348_1133849	-	chr11:1133347-1133849	Barretts	OAC	OK	41.8347	29.1111	-0.523133	-0.53938	0.27265	0.585521	no
chr11_113923005_113923506	chr11_113923005_113923506	-	chr11:113923004-113923506	Barretts	OAC	OK	33.5525	17.5763	-0.932789	-0.892387	0.08175	0.342398	no
chr11_113931098_113931599	chr11_113931098_113931599	-	chr11:113931097-113931599	Barretts	OAC	OK	48.9973	22.6379	-1.11396	-1.13457	0.02915	0.215192	no
chr11_113946550_113947051	chr11_113946550_113947051	-	chr11:113946549-113947051	Barretts	OAC	OK	26.2092	16.7082	-0.649514	-0.631068	0.199	0.509693	no
chr11_113950935_113951436	chr11_113950935_113951436	-	chr11:113950934-113951436	Barretts	OAC	OK	35.5027	23.5907	-0.589711	-0.520089	0.2987	0.610049	no
chr11_113956611_113957112	chr11_113956611_113957112	-	chr11:113956610-113957112	Barretts	OAC	OK	46.1151	20.8174	-1.14745	-1.17752	0.0244	0.198055	no
chr11_114014855_114015356	chr11_114014855_114015356	-	chr11:114014854-114015356	Barretts	OAC	OK	22.7352	4.3512	-2.38544	-1.55305	0.01855	0.176682	no
chr11_114030615_114031116	chr11_114030615_114031116	-	chr11:114030614-114031116	Barretts	OAC	OK	157.401	230.529	0.550506	0.820739	0.096	0.367757	no
chr11_114033420_114033921	chr11_114033420_114033921	-	chr11:114033419-114033921	Barretts	OAC	OK	45.2107	45.1077	-0.00329089	-0.00361537	0.9781	0.987572	no
chr11_114049838_114050339	chr11_114049838_114050339	-	chr11:114049837-114050339	Barretts	OAC	OK	59.8284	96.7494	0.693421	0.801285	0.10635	0.385602	no
chr11_114051133_114051634	chr11_114051133_114051634	-	chr11:114051132-114051634	Barretts	OAC	OK	46.6701	33.9885	-0.457452	-0.496532	0.32355	0.632346	no
chr11_114067032_114067533	chr11_114067032_114067533	-	chr11:114067031-114067533	Barretts	OAC	OK	55.0171	42.4303	-0.374784	-0.410585	0.4021	0.694282	no
chr11_114080541_114081042	chr11_114080541_114081042	-	chr11:114080540-114081042	Barretts	OAC	OK	29.138	26.112	-0.158189	-0.150992	0.75805	0.898279	no
chr11_114128442_114128943	chr11_114128442_114128943	-	chr11:114128441-114128943	Barretts	OAC	OK	28.8235	32.7785	0.185506	0.183538	0.71205	0.876024	no
chr11_114129872_114130373	chr11_114129872_114130373	-	chr11:114129871-114130373	Barretts	OAC	OK	38.7718	24.5546	-0.659012	-0.656753	0.1817	0.487642	no
chr11_114131668_114132169	chr11_114131668_114132169	-	chr11:114131667-114132169	Barretts	OAC	OK	60.2939	47.4326	-0.346134	-0.393826	0.4285	0.714203	no
chr11_114133360_114133861	chr11_114133360_114133861	-	chr11:114133359-114133861	Barretts	OAC	OK	45.7356	33.6518	-0.442634	-0.472745	0.3447	0.650753	no
chr11_114151294_114151795	chr11_114151294_114151795	-	chr11:114151293-114151795	Barretts	OAC	OK	60.4815	80.597	0.414232	0.48086	0.34695	0.652525	no
chr11_114165581_114166082	chr11_114165581_114166082	-	chr11:114165580-114166255	Barretts	OAC	OK	11.0801	43.5253	1.97388	1.07375	0.1252	0.412461	no
chr11_114165754_114166255	chr11_114165754_114166255	-	chr11:114165580-114166255	Barretts	OAC	OK	25.8231	35.3486	0.452987	0.324079	0.5316	0.781108	no
chr11_114178202_114178703	chr11_114178202_114178703	-	chr11:114178201-114178703	Barretts	OAC	OK	38.6404	47.4873	0.297432	0.293015	0.55595	0.795304	no
chr11_114186454_114186955	chr11_114186454_114186955	-	chr11:114186453-114187093	Barretts	OAC	OK	31.1268	56.5131	0.860428	0.636209	0.1834	0.489697	no
chr11_114186592_114187093	chr11_114186592_114187093	-	chr11:114186453-114187093	Barretts	OAC	OK	49.3088	17.5544	-1.49001	-0.877087	0.1729	0.477456	no
chr11_114189164_114189665	chr11_114189164_114189665	-	chr11:114189163-114189665	Barretts	OAC	OK	20.38	14.837	-0.457953	-0.420313	0.4069	0.698018	no
chr11_114210908_114211409	chr11_114210908_114211409	-	chr11:114210907-114211409	Barretts	OAC	OK	62.3759	31.139	-1.00227	-1.11351	0.02515	0.200589	no
chr11_114229408_114229909	chr11_114229408_114229909	-	chr11:114229407-114229909	Barretts	OAC	OK	12.6383	16.5065	0.385235	0.340509	0.4978	0.759581	no
chr11_114238248_114238749	chr11_114238248_114238749	-	chr11:114238247-114238749	Barretts	OAC	OK	19.3364	4.13092	-2.22678	-1.41442	0.02705	0.207841	no
chr11_1142609_1143110	chr11_1142609_1143110	-	chr11:1142608-1143110	Barretts	OAC	OK	62.0668	71.8712	0.211592	0.248182	0.62545	0.832171	no
chr11_114270557_114271058	chr11_114270557_114271058	-	chr11:114270556-114271824	Barretts	OAC	OK	62.6204	89.841	0.520742	0.331471	0.5022	0.762153	no
chr11_114271010_114271511	chr11_114271010_114271511	-	chr11:114270556-114271824	Barretts	OAC	OK	336.759	544.53	0.693295	1.12833	0.02465	0.198649	no
chr11_114271323_114271824	chr11_114271323_114271824	-	chr11:114270556-114271824	Barretts	OAC	OK	65.1451	91.8075	0.494956	0.31237	0.5448	0.788521	no
chr11_114309876_114310377	chr11_114309876_114310377	-	chr11:114309875-114310835	Barretts	OAC	OK	368.859	509.499	0.466012	0.759692	0.13255	0.423727	no
chr11_114310334_114310835	chr11_114310334_114310835	-	chr11:114309875-114310835	Barretts	OAC	OK	76.929	105.134	0.45063	0.296557	0.5501	0.791717	no
chr11_1144644_1145145	chr11_1144644_1145145	-	chr11:1144643-1145413	Barretts	OAC	OK	66.5199	86.1479	0.373028	0.340342	0.5193	0.772294	no
chr11_1144912_1145413	chr11_1144912_1145413	-	chr11:1144643-1145413	Barretts	OAC	OK	65.3683	86.3265	0.401212	0.361646	0.46945	0.740675	no
chr11_1146140_1146641	chr11_1146140_1146641	-	chr11:1146139-1146641	Barretts	OAC	OK	75.625	95.8487	0.341895	0.422087	0.39795	0.690695	no
chr11_1147815_1148316	chr11_1147815_1148316	-	chr11:1147814-1148316	Barretts	OAC	OK	128.553	214.005	0.735284	1.06369	0.03245	0.225409	no
chr11_1151193_1151694	chr11_1151193_1151694	-	chr11:1151192-1152230	Barretts	OAC	OK	124.487	119.868	-0.054546	-0.0590426	0.90395	0.961698	no
chr11_1151468_1151969	chr11_1151468_1151969	-	chr11:1151192-1152230	Barretts	OAC	OK	48.4324	47.9618	-0.0140883	-0.0092854	0.98745	0.989496	no
chr11_1151729_1152230	chr11_1151729_1152230	-	chr11:1151192-1152230	Barretts	OAC	OK	47.162	41.2461	-0.193365	-0.123311	0.8058	0.921224	no
chr11_1162338_1162839	chr11_1162338_1162839	-	chr11:1162337-1162839	Barretts	OAC	OK	81.4637	35.4983	-1.19841	-1.16449	0.0282	0.212137	no
chr11_116450395_116450896	chr11_116450395_116450896	-	chr11:116450394-116450896	Barretts	OAC	OK	38.9232	7.76228	-2.32608	-1.89535	0.0034	0.0857312	no
chr11_116450908_116451409	chr11_116450908_116451409	-	chr11:116450907-116451409	Barretts	OAC	OK	26.4374	7.60172	-1.79818	-1.34833	0.0138	0.155026	no
chr11_116453315_116453816	chr11_116453315_116453816	-	chr11:116453314-116453816	Barretts	OAC	OK	30.6665	14.0606	-1.125	-1.07667	0.0367	0.23785	no
chr11_116476200_116476701	chr11_116476200_116476701	-	chr11:116476199-116476701	Barretts	OAC	OK	43.9448	25.7012	-0.773855	-0.760225	0.14125	0.434506	no
chr11_116512203_116512704	chr11_116512203_116512704	-	chr11:116512202-116512704	Barretts	OAC	OK	61.4736	51.0675	-0.267561	-0.309581	0.53735	0.784484	no
chr11_116528902_116529403	chr11_116528902_116529403	-	chr11:116528901-116529403	Barretts	OAC	OK	21.7217	33.9312	0.643475	0.596989	0.2425	0.555658	no
chr11_116531687_116532188	chr11_116531687_116532188	-	chr11:116531686-116532188	Barretts	OAC	OK	25.6542	12.594	-1.02645	-0.955383	0.0635	0.303952	no
chr11_116558583_116559084	chr11_116558583_116559084	-	chr11:116558582-116559084	Barretts	OAC	OK	29.9206	15.915	-0.910755	-0.861933	0.0907	0.357766	no
chr11_116562355_116562856	chr11_116562355_116562856	-	chr11:116562354-116562856	Barretts	OAC	OK	73.7831	56.9608	-0.37332	-0.446921	0.3612	0.663792	no
chr11_116564209_116564710	chr11_116564209_116564710	-	chr11:116564208-116564710	Barretts	OAC	OK	153.558	102.527	-0.582777	-0.792383	0.1147	0.397817	no
chr11_116567113_116567614	chr11_116567113_116567614	-	chr11:116567112-116567614	Barretts	OAC	OK	58.6591	18.0326	-1.70175	-1.70913	0.00115	0.0504349	no
chr11_116567696_116568197	chr11_116567696_116568197	-	chr11:116567695-116568197	Barretts	OAC	OK	30.6939	31.1251	0.0201252	0.02039	0.972	0.986498	no
chr11_116577946_116578447	chr11_116577946_116578447	-	chr11:116577945-116578447	Barretts	OAC	OK	71.4272	108.139	0.598345	0.746234	0.12565	0.41324	no
chr11_116578455_116578956	chr11_116578455_116578956	-	chr11:116578454-116578956	Barretts	OAC	OK	47.9342	34.4772	-0.475413	-0.516029	0.297	0.608284	no
chr11_116587292_116587793	chr11_116587292_116587793	-	chr11:116587291-116587793	Barretts	OAC	OK	62.3653	31.1507	-1.00148	-1.08425	0.03385	0.230355	no
chr11_116603344_116603845	chr11_116603344_116603845	-	chr11:116603343-116603845	Barretts	OAC	OK	89.2968	73.3617	-0.283581	-0.34849	0.481	0.749547	no
chr11_116613476_116613977	chr11_116613476_116613977	-	chr11:116613475-116613977	Barretts	OAC	OK	46.7899	59.741	0.352523	0.392355	0.4462	0.726055	no
chr11_116643237_116643738	chr11_116643237_116643738	-	chr11:116643236-116644018	Barretts	OAC	OK	68.1894	121.613	0.834678	0.764395	0.13245	0.423524	no
chr11_116643517_116644018	chr11_116643517_116644018	-	chr11:116643236-116644018	Barretts	OAC	OK	135.836	211.614	0.639568	0.814772	0.10295	0.379397	no
chr11_116658515_116659016	chr11_116658515_116659016	-	chr11:116658514-116659460	Barretts	OAC	OK	64.7965	138.093	1.09165	1.01636	0.0428	0.2555	no
chr11_116658770_116659271	chr11_116658770_116659271	-	chr11:116658514-116659460	Barretts	OAC	OK	51.7843	72.3658	0.482793	0.349814	0.4796	0.748437	no
chr11_116658959_116659460	chr11_116658959_116659460	-	chr11:116658514-116659460	Barretts	OAC	OK	30.0549	44.9316	0.580131	0.304734	0.6682	0.853216	no
chr11_116661920_116662421	chr11_116661920_116662421	-	chr11:116661919-116662421	Barretts	OAC	OK	60.1828	109.4	0.862187	1.04527	0.04155	0.252065	no
chr11_116678834_116679335	chr11_116678834_116679335	-	chr11:116678833-116680015	Barretts	OAC	OK	87.3581	187.6	1.10264	1.06733	0.03655	0.237674	no
chr11_116678997_116679498	chr11_116678997_116679498	-	chr11:116678833-116680015	Barretts	OAC	OK	46.0512	107.224	1.21932	0.836024	0.0996	0.373817	no
chr11_116679311_116679812	chr11_116679311_116679812	-	chr11:116678833-116680015	Barretts	OAC	OK	20.6206	68.7867	1.73805	0.838772	0.178	0.483964	no
chr11_116679514_116680015	chr11_116679514_116680015	-	chr11:116678833-116680015	Barretts	OAC	OK	30.4926	87.6376	1.52309	0.93302	0.1064	0.385743	no
chr11_116684478_116684979	chr11_116684478_116684979	-	chr11:116684477-116684979	Barretts	OAC	OK	28.3736	38.6194	0.444779	0.466494	0.3536	0.657187	no
chr11_116699654_116700155	chr11_116699654_116700155	-	chr11:116699653-116700155	Barretts	OAC	OK	47.0765	48.6256	0.0467084	0.0523077	0.91775	0.96845	no
chr11_116706594_116707095	chr11_116706594_116707095	-	chr11:116706593-116707095	Barretts	OAC	OK	118.629	180.756	0.607585	0.854945	0.08525	0.348997	no
chr11_116709351_116709852	chr11_116709351_116709852	-	chr11:116709350-116709852	Barretts	OAC	OK	38.3004	22.7485	-0.751591	-0.76285	0.12515	0.412374	no
chr11_116713654_116714155	chr11_116713654_116714155	-	chr11:116713653-116714155	Barretts	OAC	OK	37.0613	68.0611	0.876918	0.972739	0.04635	0.264157	no
chr11_116723036_116723537	chr11_116723036_116723537	-	chr11:116723035-116723537	Barretts	OAC	OK	61.2065	78.675	0.36222	0.431373	0.38645	0.681607	no
chr11_116724179_116724680	chr11_116724179_116724680	-	chr11:116724178-116725004	Barretts	OAC	OK	61.3043	67.7452	0.14413	0.139316	0.77995	0.908463	no
chr11_116724503_116725004	chr11_116724503_116725004	-	chr11:116724178-116725004	Barretts	OAC	OK	28.7625	35.0614	0.285697	0.182924	0.73095	0.885943	no
chr11_116750498_116750999	chr11_116750498_116750999	-	chr11:116750497-116750999	Barretts	OAC	OK	26.8658	27.1487	0.015109	0.0148294	0.9698	0.986408	no
chr11_116800784_116801285	chr11_116800784_116801285	-	chr11:116800783-116801285	Barretts	OAC	OK	38.4825	14.1552	-1.44287	-1.30122	0.01175	0.145608	no
chr11_116843396_116843897	chr11_116843396_116843897	-	chr11:116843395-116843897	Barretts	OAC	OK	12.485	15.366	0.299545	0.250665	0.6245	0.831377	no
chr11_116860733_116861234	chr11_116860733_116861234	-	chr11:116860732-116861234	Barretts	OAC	OK	25.3227	23.427	-0.112258	-0.110114	0.8225	0.928113	no
chr11_116890163_116890664	chr11_116890163_116890664	-	chr11:116890162-116890664	Barretts	OAC	OK	40.343	38.5827	-0.0643653	-0.0682379	0.8906	0.955936	no
chr11_116897255_116897756	chr11_116897255_116897756	-	chr11:116897254-116897756	Barretts	OAC	OK	13.4999	9.1186	-0.566061	-0.462752	0.3723	0.671339	no
chr11_116915876_116916377	chr11_116915876_116916377	-	chr11:116915875-116916377	Barretts	OAC	OK	23.3719	35.6456	0.608947	0.625315	0.2219	0.534408	no
chr11_116948829_116949330	chr11_116948829_116949330	-	chr11:116948828-116949330	Barretts	OAC	OK	19.9517	23.4258	0.231584	0.203796	0.6867	0.862885	no
chr11_116968134_116968635	chr11_116968134_116968635	-	chr11:116968133-116969564	Barretts	OAC	OK	35.5986	49.0631	0.462817	0.239675	0.66245	0.850333	no
chr11_116968455_116968956	chr11_116968455_116968956	-	chr11:116968133-116969564	Barretts	OAC	OK	40.3213	61.9509	0.619581	0.377029	0.4355	0.719075	no
chr11_116968670_116969171	chr11_116968670_116969171	-	chr11:116968133-116969564	Barretts	OAC	OK	20.9714	29.927	0.513023	0.225336	0.76515	0.901416	no
chr11_116968918_116969419	chr11_116968918_116969419	-	chr11:116968133-116969564	Barretts	OAC	OK	7.90861	72.2408	3.19132	0.803779	0.20895	0.521357	no
chr11_116969063_116969564	chr11_116969063_116969564	-	chr11:116968133-116969564	Barretts	OAC	OK	96.9688	151.702	0.645652	0.601689	0.2534	0.566654	no
chr11_116976642_116977143	chr11_116976642_116977143	-	chr11:116976641-116977143	Barretts	OAC	OK	39.1768	56.6446	0.531938	0.592369	0.2496	0.562926	no
chr11_117009561_117010062	chr11_117009561_117010062	-	chr11:117009560-117010062	Barretts	OAC	OK	14.6233	23.2291	0.667668	0.566403	0.2553	0.568055	no
chr11_117014456_117014957	chr11_117014456_117014957	-	chr11:117014455-117016098	Barretts	OAC	OK	37.5669	86.0004	1.19488	0.729043	0.1759	0.481578	no
chr11_117014699_117015200	chr11_117014699_117015200	-	chr11:117014455-117016098	Barretts	OAC	OK	130.196	236.218	0.859433	0.906093	0.07265	0.322352	no
chr11_117014982_117015483	chr11_117014982_117015483	-	chr11:117014455-117016098	Barretts	OAC	OK	65.6946	93.6393	0.51134	0.378005	0.4629	0.736099	no
chr11_117015233_117015734	chr11_117015233_117015734	-	chr11:117014455-117016098	Barretts	OAC	OK	20.7972	46.4601	1.15961	0.517594	0.4099	0.700164	no
chr11_117015597_117016098	chr11_117015597_117016098	-	chr11:117014455-117016098	Barretts	OAC	OK	39.6017	41.7735	0.0770241	0.0374051	0.94815	0.980503	no
chr11_117049213_117049714	chr11_117049213_117049714	-	chr11:117049212-117049714	Barretts	OAC	OK	157.234	229.477	0.54544	0.827759	0.0993	0.373335	no
chr11_117055875_117056376	chr11_117055875_117056376	-	chr11:117055874-117056376	Barretts	OAC	OK	119.672	184.882	0.627517	0.843404	0.09005	0.356814	no
chr11_117069600_117070101	chr11_117069600_117070101	-	chr11:117069599-117070370	Barretts	OAC	OK	39.6875	23.1144	-0.779891	-0.539433	0.26135	0.574759	no
chr11_117069869_117070370	chr11_117069869_117070370	-	chr11:117069599-117070370	Barretts	OAC	OK	52.699	36.6755	-0.522959	-0.468634	0.36795	0.668013	no
chr11_117077448_117077949	chr11_117077448_117077949	-	chr11:117077447-117077949	Barretts	OAC	OK	16.7415	22.4268	0.421793	0.36613	0.46145	0.735069	no
chr11_117092281_117092782	chr11_117092281_117092782	-	chr11:117092280-117093099	Barretts	OAC	OK	70.1572	47.348	-0.567287	-0.561223	0.273	0.58569	no
chr11_117092598_117093099	chr11_117092598_117093099	-	chr11:117092280-117093099	Barretts	OAC	OK	27.6653	30.4776	0.139674	0.0903137	0.8556	0.941549	no
chr11_117097080_117097581	chr11_117097080_117097581	-	chr11:117097079-117097581	Barretts	OAC	OK	65.1114	88.268	0.438979	0.542197	0.27825	0.589932	no
chr11_117102540_117103041	chr11_117102540_117103041	-	chr11:117102539-117103553	Barretts	OAC	OK	57.5672	102.04	0.82582	0.595955	0.22415	0.536487	no
chr11_117102785_117103286	chr11_117102785_117103286	-	chr11:117102539-117103553	Barretts	OAC	OK	59.8383	86.9724	0.539489	0.404228	0.42875	0.714317	no
chr11_117103052_117103553	chr11_117103052_117103553	-	chr11:117102539-117103553	Barretts	OAC	OK	109.689	178.092	0.699194	0.711556	0.1768	0.4826	no
chr11_117170188_117170689	chr11_117170188_117170689	-	chr11:117170187-117171438	Barretts	OAC	OK	27.0464	16.478	-0.714889	-0.446842	0.39175	0.685607	no
chr11_117170444_117170945	chr11_117170444_117170945	-	chr11:117170187-117171438	Barretts	OAC	OK	30.7745	16.8583	-0.868273	-0.576573	0.26805	0.581632	no
chr11_117170937_117171438	chr11_117170937_117171438	-	chr11:117170187-117171438	Barretts	OAC	OK	34.1739	19.515	-0.808308	-0.575011	0.25375	0.566852	no
chr11_117183723_117184224	chr11_117183723_117184224	-	chr11:117183722-117184224	Barretts	OAC	OK	26.9288	17.0982	-0.6553	-0.627205	0.2242	0.536496	no
chr11_117186266_117186767	chr11_117186266_117186767	-	chr11:117186265-117187247	Barretts	OAC	OK	49.2002	36.4742	-0.431788	-0.293606	0.5527	0.793523	no
chr11_117186746_117187247	chr11_117186746_117187247	-	chr11:117186265-117187247	Barretts	OAC	OK	75.9548	100.406	0.402634	0.420627	0.39685	0.690024	no
chr11_117198276_117198777	chr11_117198276_117198777	-	chr11:117198275-117199030	Barretts	OAC	OK	230.446	326.024	0.50055	0.715259	0.15505	0.454359	no
chr11_117198529_117199030	chr11_117198529_117199030	-	chr11:117198275-117199030	Barretts	OAC	OK	104.258	165.655	0.66802	0.639029	0.2171	0.529031	no
chr11_117296883_117297384	chr11_117296883_117297384	-	chr11:117296882-117297384	Barretts	OAC	OK	46.6575	38.5986	-0.273561	-0.297734	0.56435	0.799538	no
chr11_117308990_117309491	chr11_117308990_117309491	-	chr11:117308989-117309491	Barretts	OAC	OK	28.7887	11.5968	-1.31177	-1.11352	0.0438	0.257679	no
chr11_117314176_117314677	chr11_117314176_117314677	-	chr11:117314175-117314677	Barretts	OAC	OK	48.2709	30.6642	-0.654598	-0.63984	0.20305	0.514263	no
chr11_117328000_117328501	chr11_117328000_117328501	-	chr11:117327999-117329019	Barretts	OAC	OK	24.4075	12.2939	-0.989381	-0.545466	0.37455	0.673027	no
chr11_117328120_117328621	chr11_117328120_117328621	-	chr11:117327999-117329019	Barretts	OAC	OK	13.8658	6.67235	-1.05527	-0.310119	0.46395	0.736894	no
chr11_117328518_117329019	chr11_117328518_117329019	-	chr11:117327999-117329019	Barretts	OAC	OK	44.9085	13.7736	-1.70508	-1.18432	0.05465	0.285054	no
chr11_117339574_117340075	chr11_117339574_117340075	-	chr11:117339573-117340075	Barretts	OAC	OK	23.9376	10.4751	-1.19231	-1.03226	0.04425	0.258189	no
chr11_117344497_117344998	chr11_117344497_117344998	-	chr11:117344496-117344998	Barretts	OAC	OK	33.4072	7.88525	-2.08293	-1.62315	0.00585	0.108935	no
chr11_117349149_117349650	chr11_117349149_117349650	-	chr11:117349148-117349650	Barretts	OAC	OK	18.3509	14.4696	-0.342823	-0.303685	0.5381	0.784694	no
chr11_118790480_118790981	chr11_118790480_118790981	-	chr11:118790479-118790981	Barretts	OAC	OK	96.6411	347.496	1.84629	2.65387	5e-05	0.00707764	yes
chr11_118792700_118793201	chr11_118792700_118793201	-	chr11:118792699-118793201	Barretts	OAC	OK	70.9996	149.643	1.07565	1.36864	0.00715	0.119701	no
chr11_118796472_118796973	chr11_118796472_118796973	-	chr11:118796471-118796973	Barretts	OAC	OK	91.8046	174.172	0.923875	1.25403	0.01385	0.155026	no
chr11_118798673_118799174	chr11_118798673_118799174	-	chr11:118798672-118799595	Barretts	OAC	OK	129.608	475.186	1.87434	2.54023	5e-05	0.00707764	yes
chr11_118799094_118799595	chr11_118799094_118799595	-	chr11:118798672-118799595	Barretts	OAC	OK	71.2825	213.743	1.58426	1.48919	0.00495	0.101993	no
chr11_118800091_118800592	chr11_118800091_118800592	-	chr11:118800090-118800592	Barretts	OAC	OK	67.2994	182.552	1.43964	1.89689	0.00025	0.0213894	yes
chr11_118800809_118801310	chr11_118800809_118801310	-	chr11:118800808-118801310	Barretts	OAC	OK	111.54	260.298	1.2226	1.80397	0.0006	0.0357149	yes
chr11_118809143_118809644	chr11_118809143_118809644	-	chr11:118809142-118809644	Barretts	OAC	OK	31.1693	74.1619	1.25055	1.34532	0.00815	0.125519	no
chr11_118827178_118827679	chr11_118827178_118827679	-	chr11:118827177-118827679	Barretts	OAC	OK	74.2846	120.977	0.703593	0.910323	0.06625	0.308995	no
chr11_118832142_118832643	chr11_118832142_118832643	-	chr11:118832141-118832643	Barretts	OAC	OK	36.0075	26.8303	-0.424436	-0.428499	0.38825	0.683109	no
chr11_118858869_118859370	chr11_118858869_118859370	-	chr11:118858868-118859597	Barretts	OAC	OK	14.9183	15.0593	0.0135662	0.00931663	0.9608	0.984521	no
chr11_118859096_118859597	chr11_118859096_118859597	-	chr11:118858868-118859597	Barretts	OAC	OK	13.0595	10.6716	-0.291319	-0.163357	0.7278	0.884156	no
chr11_118868502_118869003	chr11_118868502_118869003	-	chr11:118868501-118869003	Barretts	OAC	OK	143.944	212.621	0.562775	0.834925	0.0925	0.361103	no
chr11_118888903_118889404	chr11_118888903_118889404	-	chr11:118888902-118889666	Barretts	OAC	OK	135.167	200.163	0.566433	0.722183	0.1513	0.448962	no
chr11_118889165_118889666	chr11_118889165_118889666	-	chr11:118888902-118889666	Barretts	OAC	OK	61.1909	134.458	1.13577	0.997028	0.04955	0.27215	no
chr11_118891703_118892204	chr11_118891703_118892204	-	chr11:118891702-118892204	Barretts	OAC	OK	50.2954	82.0819	0.706637	0.828108	0.0984	0.371515	no
chr11_118897643_118898144	chr11_118897643_118898144	-	chr11:118897642-118898144	Barretts	OAC	OK	31.3306	58.8936	0.910538	0.999001	0.04845	0.269337	no
chr11_118899975_118900476	chr11_118899975_118900476	-	chr11:118899974-118900476	Barretts	OAC	OK	67.1975	101.69	0.597701	0.75123	0.12325	0.41015	no
chr11_118900967_118901468	chr11_118900967_118901468	-	chr11:118900966-118901940	Barretts	OAC	OK	54.9072	105.133	0.937152	0.649517	0.2348	0.547086	no
chr11_118901294_118901795	chr11_118901294_118901795	-	chr11:118900966-118901940	Barretts	OAC	OK	109.084	226.758	1.05571	0.904536	0.0747	0.327278	no
chr11_118901439_118901940	chr11_118901439_118901940	-	chr11:118900966-118901940	Barretts	OAC	OK	126.498	247.74	0.969714	0.925238	0.07645	0.33169	no
chr11_118926996_118927497	chr11_118926996_118927497	-	chr11:118926995-118928313	Barretts	OAC	OK	74.044	87.4995	0.240893	0.15133	0.75755	0.897992	no
chr11_118927372_118927873	chr11_118927372_118927873	-	chr11:118926995-118928313	Barretts	OAC	OK	40.6929	103.302	1.34402	0.731256	0.19645	0.506387	no
chr11_118927812_118928313	chr11_118927812_118928313	-	chr11:118926995-118928313	Barretts	OAC	OK	292.598	683.994	1.22506	1.91627	0.00035	0.0260979	yes
chr11_118938205_118938706	chr11_118938205_118938706	-	chr11:118938204-118938706	Barretts	OAC	OK	107.883	180.97	0.74628	1.0369	0.03605	0.236454	no
chr11_118948496_118948997	chr11_118948496_118948997	-	chr11:118948495-118948997	Barretts	OAC	OK	19.4776	16.9777	-0.198178	-0.185209	0.7126	0.87633	no
chr11_118955336_118955837	chr11_118955336_118955837	-	chr11:118955335-118956066	Barretts	OAC	OK	81.3422	191.82	1.23768	1.17896	0.0223	0.190794	no
chr11_118955565_118956066	chr11_118955565_118956066	-	chr11:118955335-118956066	Barretts	OAC	OK	114.528	163.211	0.511039	0.526509	0.3053	0.616979	no
chr11_118965042_118965543	chr11_118965042_118965543	-	chr11:118965041-118966560	Barretts	OAC	OK	40.9601	63.0214	0.621622	0.311541	0.645	0.841332	no
chr11_118965232_118965733	chr11_118965232_118965733	-	chr11:118965041-118966560	Barretts	OAC	OK	13.4895	40.9319	1.60139	0.489429	0.48235	0.750174	no
chr11_118965478_118965979	chr11_118965478_118965979	-	chr11:118965041-118966560	Barretts	OAC	OK	39.1649	133.976	1.77434	1.03101	0.096	0.367757	no
chr11_118965708_118966209	chr11_118965708_118966209	-	chr11:118965041-118966560	Barretts	OAC	OK	54.979	97.5921	0.827884	0.472995	0.3683	0.668244	no
chr11_118966059_118966560	chr11_118966059_118966560	-	chr11:118965041-118966560	Barretts	OAC	OK	226.699	575.386	1.34375	1.86887	0.0003	0.0240152	yes
chr11_118971960_118972461	chr11_118971960_118972461	-	chr11:118971959-118973608	Barretts	OAC	OK	24.8474	81.3216	1.71054	0.908824	0.21035	0.522529	no
chr11_118972115_118972616	chr11_118972115_118972616	-	chr11:118971959-118973608	Barretts	OAC	OK	32.9007	47.7075	0.536099	0.267841	0.64365	0.840578	no
chr11_118972329_118972830	chr11_118972329_118972830	-	chr11:118971959-118973608	Barretts	OAC	OK	39.4985	115.107	1.54311	0.938894	0.1364	0.428484	no
chr11_118972697_118973198	chr11_118972697_118973198	-	chr11:118971959-118973608	Barretts	OAC	OK	98.5401	246.29	1.32158	1.28984	0.0084	0.12701	no
chr11_118973107_118973608	chr11_118973107_118973608	-	chr11:118971959-118973608	Barretts	OAC	OK	36.4665	96.0431	1.39711	0.874112	0.0936	0.362875	no
chr11_118977762_118978263	chr11_118977762_118978263	-	chr11:118977761-118978263	Barretts	OAC	OK	147.712	268.814	0.863822	1.3281	0.00855	0.12778	no
chr11_118978831_118979332	chr11_118978831_118979332	-	chr11:118978830-118979332	Barretts	OAC	OK	69.1786	88.8345	0.360796	0.442759	0.35515	0.658451	no
chr11_118991925_118992426	chr11_118991925_118992426	-	chr11:118991924-118992901	Barretts	OAC	OK	300.168	716.793	1.25579	2.11083	5e-05	0.00707764	yes
chr11_118992250_118992751	chr11_118992250_118992751	-	chr11:118991924-118992901	Barretts	OAC	OK	63.9399	109.911	0.781549	0.488362	0.342	0.648387	no
chr11_118992400_118992901	chr11_118992400_118992901	-	chr11:118991924-118992901	Barretts	OAC	OK	12.1903	16.7987	0.462619	0.139375	0.83585	0.934051	no
chr11_119005041_119005542	chr11_119005041_119005542	-	chr11:119005040-119005542	Barretts	OAC	OK	40.0551	19.5687	-1.03344	-1.0734	0.03895	0.245532	no
chr11_119015480_119015981	chr11_119015480_119015981	-	chr11:119015479-119015981	Barretts	OAC	OK	44.9516	54.6789	0.282612	0.317013	0.51945	0.77241	no
chr11_119019527_119020028	chr11_119019527_119020028	-	chr11:119019526-119020196	Barretts	OAC	OK	54.1577	21.7327	-1.3173	-0.818211	0.07955	0.338104	no
chr11_119019695_119020196	chr11_119019695_119020196	-	chr11:119019526-119020196	Barretts	OAC	OK	23.6175	25.2509	0.096477	0.0544765	0.9223	0.97037	no
chr11_119027763_119028264	chr11_119027763_119028264	-	chr11:119027762-119028264	Barretts	OAC	OK	21.8007	16.9665	-0.361687	-0.346989	0.50075	0.761446	no
chr11_119038629_119039130	chr11_119038629_119039130	-	chr11:119038628-119039130	Barretts	OAC	OK	81.493	102.147	0.325906	0.406373	0.4228	0.710005	no
chr11_119039175_119039676	chr11_119039175_119039676	-	chr11:119039174-119040080	Barretts	OAC	OK	70.5451	107.675	0.610068	0.532281	0.25445	0.567396	no
chr11_119039401_119039902	chr11_119039401_119039902	-	chr11:119039174-119040080	Barretts	OAC	OK	37.5135	94.7505	1.33672	0.853537	0.17735	0.483192	no
chr11_119039579_119040080	chr11_119039579_119040080	-	chr11:119039174-119040080	Barretts	OAC	OK	38.6589	35.2823	-0.131853	-0.0695333	0.88885	0.955	no
chr11_119050628_119051129	chr11_119050628_119051129	-	chr11:119050627-119051129	Barretts	OAC	OK	24.905	14.8046	-0.750391	-0.704887	0.165	0.466783	no
chr11_119055895_119056396	chr11_119055895_119056396	-	chr11:119055894-119056396	Barretts	OAC	OK	42.3313	58.9776	0.478442	0.538067	0.268	0.581632	no
chr11_119062046_119062547	chr11_119062046_119062547	-	chr11:119062045-119062547	Barretts	OAC	OK	43.1073	52.7689	0.291756	0.32032	0.51925	0.772294	no
chr11_119066348_119066849	chr11_119066348_119066849	-	chr11:119066347-119066849	Barretts	OAC	OK	61.5352	133.444	1.11675	1.433	0.00505	0.103251	no
chr11_119067506_119068007	chr11_119067506_119068007	-	chr11:119067505-119068007	Barretts	OAC	OK	60.6575	94.74	0.643288	0.793904	0.1156	0.398754	no
chr11_119076405_119076906	chr11_119076405_119076906	-	chr11:119076404-119077953	Barretts	OAC	OK	85.1514	223.626	1.39299	1.28592	0.0154	0.162898	no
chr11_119076692_119077193	chr11_119076692_119077193	-	chr11:119076404-119077953	Barretts	OAC	OK	81.4145	188.11	1.20822	1.06285	0.04845	0.269337	no
chr11_119076987_119077488	chr11_119076987_119077488	-	chr11:119076404-119077953	Barretts	OAC	OK	43.6755	63.0796	0.53035	0.321707	0.5433	0.787823	no
chr11_119077452_119077953	chr11_119077452_119077953	-	chr11:119076404-119077953	Barretts	OAC	OK	44.1537	66.4117	0.588903	0.302604	0.5674	0.800957	no
chr11_119089110_119089611	chr11_119089110_119089611	-	chr11:119089109-119089611	Barretts	OAC	OK	16.6719	23.6912	0.506934	0.450538	0.36715	0.667166	no
chr11_119140807_119141308	chr11_119140807_119141308	-	chr11:119140806-119141308	Barretts	OAC	NOTEST	4.97085	3.10088	-0.680817	0	1	1	no
chr11_119155205_119155706	chr11_119155205_119155706	-	chr11:119155204-119155706	Barretts	OAC	OK	31.4471	16.3952	-0.939657	-0.895919	0.0694	0.316025	no
chr11_119185703_119186204	chr11_119185703_119186204	-	chr11:119185702-119186641	Barretts	OAC	OK	42.7731	32.2416	-0.407781	-0.312504	0.52295	0.775033	no
chr11_119185945_119186446	chr11_119185945_119186446	-	chr11:119185702-119186641	Barretts	OAC	OK	11.0738	13.685	0.305442	0.123627	0.86435	0.945183	no
chr11_119186140_119186641	chr11_119186140_119186641	-	chr11:119185702-119186641	Barretts	OAC	OK	41.3772	34.9901	-0.241888	-0.18371	0.71285	0.876421	no
chr11_119191644_119192145	chr11_119191644_119192145	-	chr11:119191643-119192753	Barretts	OAC	OK	62.6028	38.451	-0.703204	-0.510492	0.2962	0.607437	no
chr11_119191822_119192323	chr11_119191822_119192323	-	chr11:119191643-119192753	Barretts	OAC	OK	38.7761	23.4218	-0.727318	-0.398796	0.4885	0.754014	no
chr11_119192252_119192753	chr11_119192252_119192753	-	chr11:119191643-119192753	Barretts	OAC	OK	47.1109	56.4982	0.262145	0.19821	0.6867	0.862885	no
chr11_119204896_119205397	chr11_119204896_119205397	-	chr11:119204895-119205397	Barretts	OAC	OK	193.691	234.088	0.273299	0.42857	0.386	0.681296	no
chr11_119211012_119211513	chr11_119211012_119211513	-	chr11:119211011-119211815	Barretts	OAC	OK	39.873	48.6074	0.285763	0.230606	0.6474	0.842569	no
chr11_119211314_119211815	chr11_119211314_119211815	-	chr11:119211011-119211815	Barretts	OAC	OK	44.0023	40.8596	-0.106907	-0.0846789	0.86775	0.946286	no
chr11_119212261_119212762	chr11_119212261_119212762	-	chr11:119212260-119212762	Barretts	OAC	OK	44.868	53.1049	0.243158	0.272981	0.5779	0.806397	no
chr11_119217743_119218244	chr11_119217743_119218244	-	chr11:119217742-119218244	Barretts	OAC	OK	25.8363	22.4358	-0.203592	-0.202099	0.6868	0.862948	no
chr11_119223519_119224020	chr11_119223519_119224020	-	chr11:119223518-119224020	Barretts	OAC	OK	45.6841	44.8161	-0.0276762	-0.0293543	0.9479	0.980419	no
chr11_119226902_119227403	chr11_119226902_119227403	-	chr11:119226901-119227852	Barretts	OAC	OK	58.078	66.9502	0.205097	0.18855	0.7136	0.876847	no
chr11_119227351_119227852	chr11_119227351_119227852	-	chr11:119226901-119227852	Barretts	OAC	OK	71.1126	80.9919	0.187673	0.179985	0.722	0.88089	no
chr11_119231933_119232434	chr11_119231933_119232434	-	chr11:119231932-119232434	Barretts	OAC	OK	38.1351	25.4104	-0.585702	-0.609824	0.2223	0.534669	no
chr11_119234703_119235204	chr11_119234703_119235204	-	chr11:119234702-119235204	Barretts	OAC	OK	45.8367	67.4649	0.557633	0.615124	0.22405	0.536432	no
chr11_119239095_119239596	chr11_119239095_119239596	-	chr11:119239094-119239596	Barretts	OAC	OK	162.412	213.14	0.392145	0.587493	0.24535	0.557893	no
chr11_119241140_119241641	chr11_119241140_119241641	-	chr11:119241139-119241641	Barretts	OAC	OK	44.3753	71.2711	0.683561	0.786071	0.11415	0.397056	no
chr11_119244797_119245298	chr11_119244797_119245298	-	chr11:119244796-119245298	Barretts	OAC	OK	58.1752	64.9898	0.159809	0.186305	0.71555	0.877695	no
chr11_119246791_119247292	chr11_119246791_119247292	-	chr11:119246790-119247292	Barretts	OAC	OK	60.0055	44.8428	-0.420219	-0.462192	0.3528	0.656717	no
chr11_119252213_119252714	chr11_119252213_119252714	-	chr11:119252212-119252714	Barretts	OAC	OK	222.057	472.778	1.09023	1.86087	0.00045	0.0299616	yes
chr11_119260499_119261000	chr11_119260499_119261000	-	chr11:119260498-119261000	Barretts	OAC	OK	37.9182	19.1977	-0.98196	-1.01263	0.05225	0.279057	no
chr11_119292504_119293005	chr11_119292504_119293005	-	chr11:119292503-119293005	Barretts	OAC	OK	29.0906	14.9832	-0.95721	-0.886424	0.0716	0.320346	no
chr11_119311907_119312408	chr11_119311907_119312408	-	chr11:119311906-119312408	Barretts	OAC	OK	19.485	19.7991	0.0230723	0.0202573	0.96355	0.985476	no
chr11_119330275_119330776	chr11_119330275_119330776	-	chr11:119330274-119330776	Barretts	OAC	OK	27.4195	22.0277	-0.315882	-0.304183	0.5481	0.790275	no
chr11_119345337_119345838	chr11_119345337_119345838	-	chr11:119345336-119345838	Barretts	OAC	OK	47.2507	40.932	-0.207105	-0.231584	0.6445	0.841184	no
chr11_119351937_119352438	chr11_119351937_119352438	-	chr11:119351936-119352438	Barretts	OAC	OK	148.669	190.352	0.356564	0.517149	0.28995	0.601707	no
chr11_119355886_119356387	chr11_119355886_119356387	-	chr11:119355885-119356387	Barretts	OAC	OK	25.5102	24.476	-0.0597056	-0.0570537	0.9014	0.960712	no
chr11_119362756_119363257	chr11_119362756_119363257	-	chr11:119362755-119363478	Barretts	OAC	OK	15.489	4.61696	-1.74623	-0.882976	0.2392	0.552611	no
chr11_119362977_119363478	chr11_119362977_119363478	-	chr11:119362755-119363478	Barretts	OAC	OK	23.7268	7.85966	-1.59398	-1.07522	0.1826	0.488965	no
chr11_119364420_119364921	chr11_119364420_119364921	-	chr11:119364419-119364921	Barretts	OAC	OK	37.4328	29.4493	-0.346069	-0.355068	0.4474	0.726649	no
chr11_119380719_119381220	chr11_119380719_119381220	-	chr11:119380718-119381220	Barretts	OAC	OK	40.4963	37.7828	-0.100061	-0.105953	0.83035	0.931458	no
chr11_119404475_119404976	chr11_119404475_119404976	-	chr11:119404474-119405234	Barretts	OAC	OK	71.193	97.744	0.457274	0.473007	0.34265	0.648888	no
chr11_119404733_119405234	chr11_119404733_119405234	-	chr11:119404474-119405234	Barretts	OAC	OK	62.3902	64.0819	0.0385981	0.0344725	0.94415	0.979508	no
chr11_119408272_119408773	chr11_119408272_119408773	-	chr11:119408271-119408773	Barretts	OAC	OK	55.382	37.883	-0.547867	-0.592631	0.22775	0.54035	no
chr11_119436955_119437456	chr11_119436955_119437456	-	chr11:119436954-119437636	Barretts	OAC	OK	61.8486	97.0543	0.650052	0.622913	0.2331	0.545681	no
chr11_119437135_119437636	chr11_119437135_119437636	-	chr11:119436954-119437636	Barretts	OAC	OK	55.8408	67.0743	0.26444	0.215297	0.6663	0.85229	no
chr11_119441988_119442489	chr11_119441988_119442489	-	chr11:119441987-119442489	Barretts	OAC	OK	19.7079	18.1123	-0.121804	-0.110767	0.82075	0.927145	no
chr11_119443196_119443697	chr11_119443196_119443697	-	chr11:119443195-119443697	Barretts	OAC	OK	30.1685	59.0617	0.969183	1.0533	0.0359	0.236048	no
chr11_119449397_119449898	chr11_119449397_119449898	-	chr11:119449396-119449898	Barretts	OAC	OK	55.1372	107.487	0.963068	1.18319	0.02095	0.185818	no
chr11_119454867_119455368	chr11_119454867_119455368	-	chr11:119454866-119455368	Barretts	OAC	OK	64.8028	125.903	0.95818	1.19148	0.0179	0.174013	no
chr11_119455593_119456094	chr11_119455593_119456094	-	chr11:119455592-119456270	Barretts	OAC	OK	30.9261	39.4613	0.351613	0.254716	0.6264	0.832634	no
chr11_119455769_119456270	chr11_119455769_119456270	-	chr11:119455592-119456270	Barretts	OAC	OK	43.5145	54.9581	0.336835	0.290357	0.55375	0.793722	no
chr11_119461200_119461701	chr11_119461200_119461701	-	chr11:119461199-119461853	Barretts	OAC	OK	44.8156	81.6942	0.866232	0.515541	0.26025	0.573571	no
chr11_119461352_119461853	chr11_119461352_119461853	-	chr11:119461199-119461853	Barretts	OAC	OK	102.113	231.482	1.18074	1.34464	0.0217	0.188391	no
chr11_119486150_119486651	chr11_119486150_119486651	-	chr11:119486149-119486651	Barretts	OAC	OK	60.6087	72.477	0.257998	0.305296	0.5405	0.785956	no
chr11_119496867_119497368	chr11_119496867_119497368	-	chr11:119496866-119497368	Barretts	OAC	OK	17.6519	9.58533	-0.880927	-0.718673	0.1497	0.446535	no
chr11_119497590_119498091	chr11_119497590_119498091	-	chr11:119497589-119498091	Barretts	OAC	OK	29.9823	26.7052	-0.166991	-0.169615	0.7225	0.881068	no
chr11_119522476_119522977	chr11_119522476_119522977	-	chr11:119522475-119522977	Barretts	OAC	OK	29.0899	16.4213	-0.82495	-0.755607	0.13925	0.432056	no
chr11_119534694_119535195	chr11_119534694_119535195	-	chr11:119534693-119535433	Barretts	OAC	OK	37.1304	47.8457	0.365789	0.265808	0.6321	0.835554	no
chr11_119534932_119535433	chr11_119534932_119535433	-	chr11:119534693-119535433	Barretts	OAC	OK	28.5663	42.2451	0.564468	0.33452	0.44315	0.723866	no
chr11_119537040_119537541	chr11_119537040_119537541	-	chr11:119537039-119537541	Barretts	OAC	OK	80.2522	119.583	0.575404	0.750728	0.13205	0.423255	no
chr11_1213179_1213680	chr11_1213179_1213680	-	chr11:1213178-1213680	Barretts	OAC	OK	154.984	64.5651	-1.2633	-1.55552	0.00375	0.0897474	no
chr11_1214304_1214805	chr11_1214304_1214805	-	chr11:1214303-1214805	Barretts	OAC	OK	78.2842	39.8882	-0.972759	-1.06326	0.0413	0.251073	no
chr11_1223301_1223802	chr11_1223301_1223802	-	chr11:1223300-1223802	Barretts	OAC	OK	84.7956	74.3346	-0.189956	-0.219929	0.6717	0.855239	no
chr11_1224179_1224680	chr11_1224179_1224680	-	chr11:1224178-1224680	Barretts	OAC	OK	132.187	129.965	-0.0244499	-0.0336402	0.9467	0.980339	no
chr11_1229702_1230203	chr11_1229702_1230203	-	chr11:1229701-1230203	Barretts	OAC	OK	54.5157	66.9444	0.296291	0.314565	0.53465	0.782613	no
chr11_1240884_1241385	chr11_1240884_1241385	-	chr11:1240883-1241634	Barretts	OAC	OK	52.7964	86.3829	0.710304	0.618214	0.21375	0.526282	no
chr11_1241133_1241634	chr11_1241133_1241634	-	chr11:1240883-1241634	Barretts	OAC	OK	80.5164	83.7645	0.0570574	0.0543366	0.9127	0.965785	no
chr11_1243922_1244423	chr11_1243922_1244423	-	chr11:1243921-1244423	Barretts	OAC	OK	74.6227	87.9166	0.236521	0.28248	0.5545	0.794339	no
chr11_124406387_124406888	chr11_124406387_124406888	-	chr11:124406386-124406888	Barretts	OAC	OK	38.2241	27.4146	-0.479539	-0.496973	0.3105	0.621464	no
chr11_124456089_124456590	chr11_124456089_124456590	-	chr11:124456088-124456590	Barretts	OAC	OK	30.2949	30.7685	0.0223825	0.0230464	0.9717	0.986424	no
chr11_124492277_124492778	chr11_124492277_124492778	-	chr11:124492276-124493262	Barretts	OAC	OK	28.5735	78.8894	1.46515	0.864017	0.12365	0.410736	no
chr11_124492507_124493008	chr11_124492507_124493008	-	chr11:124492276-124493262	Barretts	OAC	OK	125.436	149.77	0.255802	0.291628	0.5566	0.795658	no
chr11_124492761_124493262	chr11_124492761_124493262	-	chr11:124492276-124493262	Barretts	OAC	OK	55.3134	67.4428	0.286036	0.213987	0.6725	0.855757	no
chr11_124509088_124509589	chr11_124509088_124509589	-	chr11:124509087-124509589	Barretts	OAC	OK	22.0524	7.30272	-1.59443	-1.17332	0.0226	0.191899	no
chr11_124514193_124514694	chr11_124514193_124514694	-	chr11:124514192-124514929	Barretts	OAC	OK	80.8836	65.9851	-0.293708	-0.296269	0.5464	0.789217	no
chr11_124514428_124514929	chr11_124514428_124514929	-	chr11:124514192-124514929	Barretts	OAC	OK	21.0293	41.601	0.984215	0.543277	0.29355	0.605103	no
chr11_124543183_124543684	chr11_124543183_124543684	-	chr11:124543182-124544308	Barretts	OAC	OK	54.6345	91.4345	0.742927	0.533135	0.29295	0.604582	no
chr11_124543423_124543924	chr11_124543423_124543924	-	chr11:124543182-124544308	Barretts	OAC	OK	120.176	249.192	1.0521	1.15561	0.0245	0.198451	no
chr11_124543656_124544157	chr11_124543656_124544157	-	chr11:124543182-124544308	Barretts	OAC	OK	99.6693	107.852	0.113835	0.0877467	0.85645	0.941957	no
chr11_124543807_124544308	chr11_124543807_124544308	-	chr11:124543182-124544308	Barretts	OAC	OK	16.106	36.9992	1.19989	0.501485	0.56185	0.7983	no
chr11_124587716_124588217	chr11_124587716_124588217	-	chr11:124587715-124588608	Barretts	OAC	OK	38.2785	23.3096	-0.715612	-0.493281	0.3267	0.635195	no
chr11_124588107_124588608	chr11_124588107_124588608	-	chr11:124587715-124588608	Barretts	OAC	OK	56.5279	29.4746	-0.939493	-0.801887	0.12685	0.415116	no
chr11_124594735_124595236	chr11_124594735_124595236	-	chr11:124594734-124595366	Barretts	OAC	OK	20.4591	43.9793	1.10408	0.60908	0.3995	0.691799	no
chr11_124594865_124595366	chr11_124594865_124595366	-	chr11:124594734-124595366	Barretts	OAC	OK	73.9489	43.2086	-0.775209	-0.552618	0.1775	0.483359	no
chr11_124609513_124610014	chr11_124609513_124610014	-	chr11:124609512-124610320	Barretts	OAC	OK	239.875	255.946	0.0935545	0.139517	0.77915	0.907835	no
chr11_124609819_124610320	chr11_124609819_124610320	-	chr11:124609512-124610320	Barretts	OAC	OK	43.3013	59.3476	0.454778	0.257603	0.6005	0.818387	no
chr11_124616403_124616904	chr11_124616403_124616904	-	chr11:124616402-124617225	Barretts	OAC	OK	135.05	235.513	0.802319	0.859842	0.0881	0.353639	no
chr11_124616724_124617225	chr11_124616724_124617225	-	chr11:124616402-124617225	Barretts	OAC	OK	245.219	409.715	0.740552	1.07641	0.03255	0.225563	no
chr11_124621891_124622392	chr11_124621891_124622392	-	chr11:124621890-124622392	Barretts	OAC	OK	108.873	135.269	0.313178	0.404113	0.42455	0.711248	no
chr11_124628174_124628675	chr11_124628174_124628675	-	chr11:124628173-124628675	Barretts	OAC	OK	130.981	206.429	0.656285	0.938723	0.05615	0.287919	no
chr11_124628686_124629187	chr11_124628686_124629187	-	chr11:124628685-124629187	Barretts	OAC	OK	62.5794	93.4842	0.579035	0.67247	0.18315	0.489459	no
chr11_124631946_124632447	chr11_124631946_124632447	-	chr11:124631945-124632662	Barretts	OAC	OK	76.6226	145.932	0.929456	0.930875	0.08795	0.353485	no
chr11_124632161_124632662	chr11_124632161_124632662	-	chr11:124631945-124632662	Barretts	OAC	OK	73.7219	118.375	0.683205	0.608111	0.19535	0.504989	no
chr11_124633000_124633501	chr11_124633000_124633501	-	chr11:124632999-124633501	Barretts	OAC	OK	48.1343	88.953	0.885977	1.01491	0.04545	0.261467	no
chr11_124638786_124639287	chr11_124638786_124639287	-	chr11:124638785-124639287	Barretts	OAC	OK	38.463	42.7026	0.150851	0.154834	0.75085	0.894832	no
chr11_124663471_124663972	chr11_124663471_124663972	-	chr11:124663470-124663972	Barretts	OAC	OK	46.077	33.6807	-0.452123	-0.495637	0.3126	0.622974	no
chr11_124669470_124669971	chr11_124669470_124669971	-	chr11:124669469-124670994	Barretts	OAC	OK	45.7537	37.7896	-0.275896	-0.143072	0.7877	0.912711	no
chr11_124669649_124670150	chr11_124669649_124670150	-	chr11:124669469-124670994	Barretts	OAC	OK	16.2314	41.2002	1.34387	0.526343	0.43095	0.715483	no
chr11_124670069_124670570	chr11_124670069_124670570	-	chr11:124669469-124670994	Barretts	OAC	OK	93.9571	112.348	0.257897	0.244595	0.6364	0.837961	no
chr11_124670326_124670827	chr11_124670326_124670827	-	chr11:124669469-124670994	Barretts	OAC	OK	59.4127	111.345	0.906192	0.65174	0.226	0.538251	no
chr11_124670493_124670994	chr11_124670493_124670994	-	chr11:124669469-124670994	Barretts	OAC	OK	50.8765	40.1495	-0.341618	-0.132435	0.73355	0.887457	no
chr11_124686892_124687393	chr11_124686892_124687393	-	chr11:124686891-124687393	Barretts	OAC	OK	25.7285	19.0422	-0.434162	-0.430168	0.395	0.688492	no
chr11_124693487_124693988	chr11_124693487_124693988	-	chr11:124693486-124694237	Barretts	OAC	OK	20.6992	11.3947	-0.861204	-0.455909	0.4887	0.754155	no
chr11_124693736_124694237	chr11_124693736_124694237	-	chr11:124693486-124694237	Barretts	OAC	OK	34.6587	32.9072	-0.0748104	-0.0612176	0.89425	0.95734	no
chr11_124702411_124702912	chr11_124702411_124702912	-	chr11:124702410-124703043	Barretts	OAC	OK	12.6721	8.28624	-0.612861	-0.227461	0.59735	0.816491	no
chr11_124702542_124703043	chr11_124702542_124703043	-	chr11:124702410-124703043	Barretts	OAC	OK	44.2214	18.7687	-1.23642	-0.989485	0.1134	0.396428	no
chr11_124704377_124704878	chr11_124704377_124704878	-	chr11:124704376-124704878	Barretts	OAC	OK	112.617	82.0433	-0.456969	-0.589929	0.22745	0.539858	no
chr11_124706823_124707324	chr11_124706823_124707324	-	chr11:124706822-124707324	Barretts	OAC	OK	50.2512	53.9433	0.102285	0.115922	0.8146	0.92475	no
chr11_124732897_124733398	chr11_124732897_124733398	-	chr11:124732896-124733604	Barretts	OAC	OK	52.0985	47.173	-0.14328	-0.126727	0.8073	0.921695	no
chr11_124733103_124733604	chr11_124733103_124733604	-	chr11:124732896-124733604	Barretts	OAC	OK	25.5736	27.0889	0.0830458	0.0469747	0.924	0.970985	no
chr11_124745730_124746231	chr11_124745730_124746231	-	chr11:124745729-124746813	Barretts	OAC	OK	65.4857	63.2799	-0.0494329	-0.0340292	0.9423	0.979005	no
chr11_124746083_124746584	chr11_124746083_124746584	-	chr11:124745729-124746813	Barretts	OAC	OK	162.655	199.368	0.293619	0.347318	0.4827	0.750561	no
chr11_124746312_124746813	chr11_124746312_124746813	-	chr11:124745729-124746813	Barretts	OAC	OK	99.4067	193.496	0.960885	0.978056	0.0569	0.289294	no
chr11_124752149_124752650	chr11_124752149_124752650	-	chr11:124752148-124752650	Barretts	OAC	OK	27.0386	34.5891	0.355299	0.364791	0.45275	0.729892	no
chr11_124770364_124770865	chr11_124770364_124770865	-	chr11:124770363-124770865	Barretts	OAC	OK	25.6481	17.0925	-0.585493	-0.567281	0.25255	0.566169	no
chr11_124785862_124786363	chr11_124785862_124786363	-	chr11:124785861-124786363	Barretts	OAC	OK	22.9642	11.2757	-1.02617	-0.842241	0.08505	0.34863	no
[truncated: 33,221 more rows]

## Sheet: S2B 2x open regions
chr	start	end
chr4	69462867	69463369	chr4_69462868_69463369
chr5	10315920	10316725	chr5_10316224_10316725
chr7	97602511	97603013	chr7_97602512_97603013
chr5	10315920	10316725	chr5_10315921_10316422
chr10	94588759	94589261	chr10_94588760_94589261
chr11	125727178	125727968	chr11_125727467_125727968
chr19	49004640	49005792	chr19_49005072_49005573
chr7	100546645	100547320	chr7_100546819_100547320
chr8	15890250	15890752	chr8_15890251_15890752
chr20	62184607	62185781	chr20_62184608_62185109
chr19	3284371	3285701	chr19_3285200_3285701
chr20	23317034	23317536	chr20_23317035_23317536
chr1	87624684	87625483	chr1_87624982_87625483
chr19	4310213	4311149	chr19_4310648_4311149
chr7	77110849	77111739	chr7_77110850_77111351
chr3	120341568	120342662	chr3_120342161_120342662
chr19	30369815	30370317	chr19_30369816_30370317
chr8	145690583	145691734	chr8_145691021_145691522
chr11	76934807	76935309	chr11_76934808_76935309
chr3	87146787	87147289	chr3_87146788_87147289
chr1	207405424	207405926	chr1_207405425_207405926
chr7	100825675	100826177	chr7_100825676_100826177
chr11	73072765	73073568	chr11_73073067_73073568
chr13	29284210	29284712	chr13_29284211_29284712
chr10	91544796	91545298	chr10_91544797_91545298
chr1	36335101	36335603	chr1_36335102_36335603
chr1	151583581	151584083	chr1_151583582_151584083
chr19	703569	704342	chr19_703841_704342
chr8	124593281	124593783	chr8_124593282_124593783
chr7	73699141	73699643	chr7_73699142_73699643
chr11	75384986	75385488	chr11_75384987_75385488
chr8	47987078	47987871	chr8_47987370_47987871
chr11	68890124	68890976	chr11_68890125_68890626
chr6	34499491	34499993	chr6_34499492_34499993
chr20	30815044	30816158	chr20_30815453_30815954
chr8	143758339	143759269	chr8_143758340_143758841
chr1	150943631	150944133	chr1_150943632_150944133
chr5	38634883	38635385	chr5_38634884_38635385
chr17	73092114	73092616	chr17_73092115_73092616
chr19	30332497	30332999	chr19_30332498_30332999
chr11	67764141	67765225	chr11_67764441_67764942
chr12	96021790	96022292	chr12_96021791_96022292
chr4	120023776	120024278	chr4_120023777_120024278
chr3	42925825	42926327	chr3_42925826_42926327
chr7	99276610	99277112	chr7_99276611_99277112
chr16	29888768	29889270	chr16_29888769_29889270
chr12	2888408	2888910	chr12_2888409_2888910
chr8	8639775	8640277	chr8_8639776_8640277
chr17	57860205	57860707	chr17_57860206_57860707
chr19	17007822	17008852	chr19_17007823_17008324
chr17	73083514	73084452	chr17_73083708_73084209
chr20	61195868	61196370	chr20_61195869_61196370
chr20	62572960	62573462	chr20_62572961_62573462
chr5	138032145	138032647	chr5_138032146_138032647
chr19	10371702	10372204	chr19_10371703_10372204
chr15	91056634	91057136	chr15_91056635_91057136
chr7	97580765	97581267	chr7_97580766_97581267
chr7	16801831	16802333	chr7_16801832_16802333
chr8	11218391	11218893	chr8_11218392_11218893
chr7	99283871	99284373	chr7_99283872_99284373
chr8	145555344	145555986	chr8_145555345_145555846
chr5	114404379	114404881	chr5_114404380_114404881
chr11	68886584	68887086	chr11_68886585_68887086
chr1	201986319	201986821	chr1_201986320_201986821
chr1	202501193	202501796	chr1_202501194_202501695
chr10	124053041	124053974	chr10_124053473_124053974
chr1	43889245	43889747	chr1_43889246_43889747
chr19	14675019	14675521	chr19_14675020_14675521
chr5	42931589	42932091	chr5_42931590_42932091
chr13	29119730	29120232	chr13_29119731_29120232
chr7	99349217	99349719	chr7_99349218_99349719
chr7	92264343	92264845	chr7_92264344_92264845
chr11	68598536	68599038	chr11_68598537_68599038
chr16	75174519	75175021	chr16_75174520_75175021
chr5	126199618	126200120	chr5_126199619_126200120
chr7	117075506	117076008	chr7_117075507_117076008
chr11	67120274	67121383	chr11_67120882_67121383
chr4	85420406	85420908	chr4_85420407_85420908
chr19	38997442	38998258	chr19_38997617_38998118
chr20	18073466	18073968	chr20_18073467_18073968
chr13	29148723	29149831	chr13_29148724_29149225
chr7	89905553	89906055	chr7_89905554_89906055
chr16	31149927	31150649	chr16_31149928_31150429
chr7	89860560	89861062	chr7_89860561_89861062
chr20	30815044	30816158	chr20_30815657_30816158
chr12	52537340	52537842	chr12_52537341_52537842
chr11	67764141	67765225	chr11_67764142_67764643
chr7	100844160	100844662	chr7_100844161_100844662
chr19	36334705	36335207	chr19_36334706_36335207
chr9	22112845	22113347	chr9_22112846_22113347
chr16	57326448	57326950	chr16_57326449_57326950
chr22	38614498	38615000	chr22_38614499_38615000
chr11	69453668	69454170	chr11_69453669_69454170
chr20	62173259	62173761	chr20_62173260_62173761
chr9	92171204	92171930	chr9_92171205_92171706
chr13	52430068	52430727	chr13_52430069_52430570
chr7	73246422	73246924	chr7_73246423_73246924
chr5	150464936	150465727	chr5_150465226_150465727
chr3	182928708	182929586	chr3_182929085_182929586
chr11	67141079	67142050	chr11_67141080_67141581
chr7	100787240	100787742	chr7_100787241_100787742
chr8	11219153	11219655	chr8_11219154_11219655
chr5	14342337	14342839	chr5_14342338_14342839
chr15	77448298	77448800	chr15_77448299_77448800
chr7	92274784	92275470	chr7_92274969_92275470
chr7	99291001	99291503	chr7_99291002_99291503
chr12	52540980	52541482	chr12_52540981_52541482
chr19	39894106	39894843	chr19_39894342_39894843
chr15	91382629	91383474	chr15_91382973_91383474
chr11	73020219	73020721	chr11_73020220_73020721
chr1	202018142	202018750	chr1_202018143_202018644
chr11	67746137	67746747	chr11_67746246_67746747
chr11	2788243	2788745	chr11_2788244_2788745
chr7	89840790	89841769	chr7_89840791_89841292
chr11	67124256	67124758	chr11_67124257_67124758
chr20	30299786	30300862	chr20_30300361_30300862
chr11	355533	356567	chr11_355847_356348
chr15	91659601	91660103	chr15_91659602_91660103
chr11	67122013	67122515	chr11_67122014_67122515
chr1	151167619	151168121	chr1_151167620_151168121
chr12	14818817	14819319	chr12_14818818_14819319
chr3	184241578	184242080	chr3_184241579_184242080
chr1	156426139	156427788	chr1_156427287_156427788
chr3	182970677	182971179	chr3_182970678_182971179
chr1	183149875	183150377	chr1_183149876_183150377
chr11	69926845	69927347	chr11_69926846_69927347
chr11	75054540	75055042	chr11_75054541_75055042
chr15	45122911	45123413	chr15_45122912_45123413
chr7	90225102	90226092	chr7_90225350_90225851
chr15	31083333	31083835	chr15_31083334_31083835
chr9	22085102	22085604	chr9_22085103_22085604
chr17	55491102	55491873	chr17_55491372_55491873
chr7	90038924	90039426	chr7_90038925_90039426
chr20	32384290	32385069	chr20_32384291_32384792
chr11	67112723	67113225	chr11_67112724_67113225
chr7	73701211	73702071	chr7_73701570_73702071
chr1	151653203	151653705	chr1_151653204_151653705
chr20	32377340	32377842	chr20_32377341_32377842
chr17	38256762	38257755	chr17_38257254_38257755
chr9	104089656	104090158	chr9_104089657_104090158
chr19	44128012	44128514	chr19_44128013_44128514
chr8	8313270	8314011	chr8_8313510_8314011
chr3	170048078	170048580	chr3_170048079_170048580
chr19	16933880	16934382	chr19_16933881_16934382
chr7	23749475	23749977	chr7_23749476_23749977
chr8	48647670	48648172	chr8_48647671_48648172
chr19	17728196	17728698	chr19_17728197_17728698
chr2	111056593	111057095	chr2_111056594_111057095
chr1	26216656	26217454	chr1_26216953_26217454
chr16	29911178	29912101	chr16_29911600_29912101
chr1	33225633	33226389	chr1_33225634_33226135
chr19	50320548	50321050	chr19_50320549_50321050
chr17	72987681	72988183	chr17_72987682_72988183
chr11	76674427	76675255	chr11_76674428_76674929
chr17	57930534	57931340	chr17_57930535_57931036
chr11	69259110	69259612	chr11_69259111_69259612
chr11	75048318	75048820	chr11_75048319_75048820
chr19	15562781	15563729	chr19_15562969_15563470
chr4	56936173	56936675	chr4_56936174_56936675
chr7	100728408	100729221	chr7_100728409_100728910
chr17	73155160	73156014	chr17_73155513_73156014
chr7	100887427	100888628	chr7_100887853_100888354
chr7	100808667	100809169	chr7_100808668_100809169
chr19	39901466	39902249	chr19_39901748_39902249
chr7	73157137	73157639	chr7_73157138_73157639
chr11	125384102	125384926	chr11_125384103_125384604
chr11	68548286	68548788	chr11_68548287_68548788
chr20	61408074	61408576	chr20_61408075_61408576
chr11	75097934	75098436	chr11_75097935_75098436
chr6	2849000	2849502	chr6_2849001_2849502
chr11	118798672	118799595	chr11_118798673_118799174
chr4	57228818	57229675	chr4_57229174_57229675
chr7	23510646	23511148	chr7_23510647_23511148
chr11	68776194	68776696	chr11_68776195_68776696
chr11	65190128	65190830	chr11_65190129_65190630
chr11	67080074	67080576	chr11_67080075_67080576
chr15	45737439	45738248	chr15_45737440_45737941
chr8	11759716	11760218	chr8_11759717_11760218
chr11	61582516	61583018	chr11_61582517_61583018
chr20	30284890	30285392	chr20_30284891_30285392
chr7	99427137	99427639	chr7_99427138_99427639
chr11	76797830	76798570	chr11_76798069_76798570
chr1	155156224	155156726	chr1_155156225_155156726
chr17	55453022	55453524	chr17_55453023_55453524
chr8	8800009	8800511	chr8_8800010_8800511
chr7	100895095	100895946	chr7_100895445_100895946
chr11	118790479	118790981	chr11_118790480_118790981
chr17	38254314	38254816	chr17_38254315_38254816
chr16	30752742	30753244	chr16_30752743_30753244
chr11	64937381	64937883	chr11_64937382_64937883
chr11	67231326	67233153	chr11_67231327_67231828
chr11	74243505	74244007	chr11_74243506_74244007
chr14	56442812	56443750	chr14_56442813_56443314
chr7	48039629	48040131	chr7_48039630_48040131
chr1	155098285	155099481	chr1_155098286_155098787
chr7	100835656	100836158	chr7_100835657_100836158
chr19	47792595	47793460	chr19_47792959_47793460
chr7	99349985	99350487	chr7_99349986_99350487
chr7	73245005	73245507	chr7_73245006_73245507
chr14	24776943	24777751	chr14_24776944_24777445
chr15	91675274	91675776	chr15_91675275_91675776
chr12	53289569	53290381	chr12_53289880_53290381
chr6	123067783	123068285	chr6_123067784_123068285
chr5	40641414	40641916	chr5_40641415_40641916
chr1	46008137	46008639	chr1_46008138_46008639
chr9	33186346	33186848	chr9_33186347_33186848
chr7	16707603	16708105	chr7_16707604_16708105
chr7	87364639	87365141	chr7_87364640_87365141
chr11	76786538	76787040	chr11_76786539_76787040
chr11	65149151	65150475	chr11_65149647_65150148
chr2	97170915	97171417	chr2_97170916_97171417
chr8	81191607	81192109	chr8_81191608_81192109
chr17	73120302	73120804	chr17_73120303_73120804
chr8	95210678	95211180	chr8_95210679_95211180
chr1	155156751	155157253	chr1_155156752_155157253
chr11	76902991	76903493	chr11_76902992_76903493
chr6	138111446	138111948	chr6_138111447_138111948
chr11	61523822	61524695	chr11_61523823_61524324
chr4	74965274	74965776	chr4_74965275_74965776
chr1	202087580	202088470	chr1_202087969_202088470
chr7	99160462	99160964	chr7_99160463_99160964
chr7	89817555	89818057	chr7_89817556_89818057
chr20	61283283	61284333	chr20_61283435_61283936
chr1	201977222	201977724	chr1_201977223_201977724
chr5	43402553	43403362	chr5_43402861_43403362
chr1	156718368	156718870	chr1_156718369_156718870
chr2	112732568	112733070	chr2_112732569_112733070
chr1	161712898	161713400	chr1_161712899_161713400
chr7	99612962	99613464	chr7_99612963_99613464
chr7	99370130	99370632	chr7_99370131_99370632
chr12	53298516	53299200	chr12_53298699_53299200
chr20	30198308	30198810	chr20_30198309_30198810
chr1	156099962	156100464	chr1_156099963_156100464
chr2	228683319	228683821	chr2_228683320_228683821
chr20	61371605	61372107	chr20_61371606_61372107
chr20	32261991	32262958	chr20_32261992_32262493
chr20	62318020	62318786	chr20_62318021_62318522
chr7	92336694	92337196	chr7_92336695_92337196
chr8	143858243	143858964	chr8_143858463_143858964
chr20	31766443	31766945	chr20_31766444_31766945
chr19	52229208	52229710	chr19_52229209_52229710
chr2	238873650	238874152	chr2_238873651_238874152
chr7	35051703	35052205	chr7_35051704_35052205
chr1	192708509	192709011	chr1_192708510_192709011
chr11	67615955	67616457	chr11_67615956_67616457
chr20	33113415	33114220	chr20_33113719_33114220
chr11	67983445	67984551	chr11_67983446_67983947
chr20	47903618	47904120	chr20_47903619_47904120
chr11	65189435	65189937	chr11_65189436_65189937
chr11	75245156	75245658	chr11_75245157_75245658
chr12	53318807	53319309	chr12_53318808_53319309
chr8	81319369	81319871	chr8_81319370_81319871
chr11	74294053	74294555	chr11_74294054_74294555
chr1	36866208	36867412	chr1_36866555_36867056
chr11	67495581	67496083	chr11_67495582_67496083
chr20	52739943	52740633	chr20_52740132_52740633
chr11	67141079	67142050	chr11_67141549_67142050
chr7	100660263	100661159	chr7_100660658_100661159
chr7	44787824	44788925	chr7_44787825_44788326
chr8	11161857	11162359	chr8_11161858_11162359
chr16	29910373	29911166	chr16_29910665_29911166
chr11	63705912	63706569	chr11_63705913_63706414
chr19	18496714	18497216	chr19_18496715_18497216
chr11	73018340	73019125	chr11_73018341_73018842
chr7	99277410	99277912	chr7_99277411_99277912
chr7	16718447	16718949	chr7_16718448_16718949
chr19	48901550	48902479	chr19_48901978_48902479
chr8	126137774	126138569	chr8_126137775_126138276
chr7	16844378	16844880	chr7_16844379_16844880
chr17	73178447	73179448	chr17_73178947_73179448
chr4	8201715	8202217	chr4_8201716_8202217
chr3	9684030	9684767	chr3_9684266_9684767
chr11	76673907	76674409	chr11_76673908_76674409
chr1	160068240	160069074	chr1_160068241_160068742
chr17	73075471	73075973	chr17_73075472_73075973
chr6	137558433	137558935	chr6_137558434_137558935
chr12	13043638	13044678	chr12_13044177_13044678
chr6	41487067	41488170	chr6_41487068_41487569
chr8	81348010	81348512	chr8_81348011_81348512
chr15	45740205	45740707	chr15_45740206_45740707
chr19	703569	704342	chr19_703570_704071
chr7	90054652	90055154	chr7_90054653_90055154
chr11	67858102	67858604	chr11_67858103_67858604
chr20	60987526	60988028	chr20_60987527_60988028
chr20	30200564	30201066	chr20_30200565_30201066
chr7	48179719	48180221	chr7_48179720_48180221
chr11	76499201	76500187	chr11_76499686_76500187
chr16	68233973	68234475	chr16_68233974_68234475
chr17	26763518	26764020	chr17_26763519_26764020
chr1	207082613	207083115	chr1_207082614_207083115
chr14	39673107	39673609	chr14_39673108_39673609
chr20	32978558	32979060	chr20_32978559_32979060
chr20	30292277	30292779	chr20_30292278_30292779
chr11	129149210	129149919	chr11_129149211_129149712
chr8	145638266	145639236	chr8_145638267_145638768
chr17	49223438	49223940	chr17_49223439_49223940
chr19	49363242	49363744	chr19_49363243_49363744
chr9	123895332	123896132	chr9_123895333_123895834
chr7	100626687	100627189	chr7_100626688_100627189
chr7	73184415	73185324	chr7_73184416_73184917
chr5	10307499	10308215	chr5_10307714_10308215
chr7	26240889	26241842	chr7_26240890_26241391
chr7	73265011	73265513	chr7_73265012_73265513
chr11	67340106	67340608	chr11_67340107_67340608
chr7	100875337	100876171	chr7_100875670_100876171
chr11	69452848	69453350	chr11_69452849_69453350
chr20	33917269	33917771	chr20_33917270_33917771
chr1	31324841	31325343	chr1_31324842_31325343
chr11	69484908	69485410	chr11_69484909_69485410
chr2	9304190	9304692	chr2_9304191_9304692
chr7	15435793	15436295	chr7_15435794_15436295
chr10	6321366	6321868	chr10_6321367_6321868
chr11	70328207	70328947	chr11_70328208_70328709
chr17	57923530	57924032	chr17_57923531_57924032
chr17	38255126	38255793	chr17_38255292_38255793
chr22	38674684	38675186	chr22_38674685_38675186
chr11	67113411	67113913	chr11_67113412_67113913
chr5	912212	912981	chr5_912480_912981
chr16	433227	433729	chr16_433228_433729
chr7	97715510	97716012	chr7_97715511_97716012
chr17	46993153	46993655	chr17_46993154_46993655
chr10	1019910	1020412	chr10_1019911_1020412
chr7	89783499	89784250	chr7_89783500_89784001
chr9	22108990	22109492	chr9_22108991_22109492
chr11	69294229	69295040	chr11_69294539_69295040
chr19	47734432	47734934	chr19_47734433_47734934
chr15	78673997	78674499	chr15_78673998_78674499
chr19	12951317	12952298	chr19_12951318_12951819
chr20	56269982	56270484	chr20_56269983_56270484
chr5	42932113	42932615	chr5_42932114_42932615
chr1	156629734	156630236	chr1_156629735_156630236
chr11	67007145	67007647	chr11_67007146_67007647
chr17	49199002	49199504	chr17_49199003_49199504
chr19	39900056	39901000	chr19_39900057_39900558
chr11	393160	393662	chr11_393161_393662
chr11	68816050	68816552	chr11_68816051_68816552
chr19	49163091	49163593	chr19_49163092_49163593
chr11	67348797	67349299	chr11_67348798_67349299
chr16	31007663	31008895	chr16_31008394_31008895
chr6	33041230	33041732	chr6_33041231_33041732
chr20	62168540	62169670	chr20_62168999_62169500
chr21	42931883	42932385	chr21_42931884_42932385
chr11	129013168	129013670	chr11_129013169_129013670
chr1	201992054	201992556	chr1_201992055_201992556
chr19	49240643	49241145	chr19_49240644_49241145
chr8	145577931	145578433	chr8_145577932_145578433
chr20	32431666	32432168	chr20_32431667_32432168
chr11	67034908	67035410	chr11_67034909_67035410
chr11	73094106	73094608	chr11_73094107_73094608
chr11	76799597	76800099	chr11_76799598_76800099
chr20	32319650	32320628	chr20_32319651_32320152
chr2	27543844	27544346	chr2_27543845_27544346
chr20	44539340	44540294	chr20_44539341_44539842
chr17	73149762	73150993	chr17_73150492_73150993
chr7	29633032	29633534	chr7_29633033_29633534
chr7	99552831	99553333	chr7_99552832_99553333
chr7	100797476	100797978	chr7_100797477_100797978
chr15	59575785	59576603	chr15_59576102_59576603
chr1	211776706	211777208	chr1_211776707_211777208
chr5	10301940	10302442	chr5_10301941_10302442
chr7	73416963	73417465	chr7_73416964_73417465
chr11	76303960	76304462	chr11_76303961_76304462
chr16	30085844	30086346	chr16_30085845_30086346
chr8	95218759	95219261	chr8_95218760_95219261
chr7	92462177	92463008	chr7_92462178_92462679
chr11	68518796	68519298	chr11_68518797_68519298
chr11	75034566	75035068	chr11_75034567_75035068
chr10	124104152	124104654	chr10_124104153_124104654
chr20	30196260	30196762	chr20_30196261_30196762
chr21	43135807	43136309	chr21_43135808_43136309
chr9	22103948	22104450	chr9_22103949_22104450
chr6	30080764	30081518	chr6_30080765_30081266
chr20	31762900	31763402	chr20_31762901_31763402
chr7	16717605	16718107	chr7_16717606_16718107
chr17	38332540	38333434	chr17_38332541_38333042
chr8	124631864	124632366	chr8_124631865_124632366
chr8	11816340	11816842	chr8_11816341_11816842
chr20	35972791	35973293	chr20_35972792_35973293
chr1	151971350	151971852	chr1_151971351_151971852
chr9	35115697	35116730	chr9_35116031_35116532
chr11	68611275	68611777	chr11_68611276_68611777
chr7	73247505	73248007	chr7_73247506_73248007
chr21	47724733	47725235	chr21_47724734_47725235
chr3	127465335	127466042	chr3_127465336_127465837
chr19	49866725	49867227	chr19_49866726_49867227
chr17	62675928	62676430	chr17_62675929_62676430
chr19	49981951	49982453	chr19_49981952_49982453
chr3	169386766	169387268	chr3_169386767_169387268
chr8	101315234	101315736	chr8_101315235_101315736
chr20	2607489	2607991	chr20_2607490_2607991
chr1	161582067	161582842	chr1_161582068_161582569
chr11	67070182	67071163	chr11_67070662_67071163
chr14	24861443	24861945	chr14_24861444_24861945
chr10	102086686	102087188	chr10_102086687_102087188
chr20	62496213	62496715	chr20_62496214_62496715
chr11	67168816	67169637	chr11_67169136_67169637
chr11	67980057	67980559	chr11_67980058_67980559
chr20	52684107	52684609	chr20_52684108_52684609
chr4	149519872	149520374	chr4_149519873_149520374
chr7	95237994	95238496	chr7_95237995_95238496
chr7	26318938	26319440	chr7_26318939_26319440
chr7	100540042	100540544	chr7_100540043_100540544
chr7	73149040	73149878	chr7_73149041_73149542
chr19	17007822	17008852	chr19_17007980_17008481
chr11	75082961	75083694	chr11_75083193_75083694
chr7	100860592	100861094	chr7_100860593_100861094
chr14	34507815	34508317	chr14_34507816_34508317
chr1	155162409	155163980	chr1_155162614_155163115
chr8	8414406	8414908	chr8_8414407_8414908
chr3	170074372	170075681	chr3_170074783_170075284
chr11	65138498	65139000	chr11_65138499_65139000
chr2	9282682	9283184	chr2_9282683_9283184
chr21	44859242	44859744	chr21_44859243_44859744
chr6	133008375	133008877	chr6_133008376_133008877
chr8	8547252	8547754	chr8_8547253_8547754
chr15	40398672	40399427	chr15_40398926_40399427
chr11	64122488	64122990	chr11_64122489_64122990
chr7	73693931	73694433	chr7_73693932_73694433
chr7	99317853	99318355	chr7_99317854_99318355
chr3	170075834	170076524	chr3_170075835_170076336
chr7	73588206	73589455	chr7_73588207_73588708
chr7	99296753	99297255	chr7_99296754_99297255
chr2	85534029	85534531	chr2_85534030_85534531
chr9	21853407	21853909	chr9_21853408_21853909
chr2	28884775	28885505	chr2_28884776_28885277
chr11	64623750	64624546	chr11_64624045_64624546
chr11	76091290	76092876	chr11_76091987_76092488
chr11	1855274	1855776	chr11_1855275_1855776
chr15	55806634	55807136	chr15_55806635_55807136
chr11	34296251	34297038	chr11_34296252_34296753
chr8	11801069	11801571	chr8_11801070_11801571
chr19	3481614	3482116	chr19_3481615_3482116
chr2	112416983	112417485	chr2_112416984_112417485
chr11	69451237	69451739	chr11_69451238_69451739
chr7	44679302	44679804	chr7_44679303_44679804
chr11	68868816	68869318	chr11_68868817_68869318
chr5	76126918	76127420	chr5_76126919_76127420
chr17	62502006	62503539	chr17_62502319_62502820
chr19	52205474	52206720	chr19_52205475_52205976
chr22	43336232	43336734	chr22_43336233_43336734
chr8	85983655	85984157	chr8_85983656_85984157
chr17	72977957	72978747	chr17_72978246_72978747
chr7	50624193	50624695	chr7_50624194_50624695
chr8	101372952	101373454	chr8_101372953_101373454
chr1	155099568	155100070	chr1_155099569_155100070
chr12	64846523	64847025	chr12_64846524_64847025
chr15	59158325	59158827	chr15_59158326_59158827
chr21	44762969	44763471	chr21_44762970_44763471
chr6	30123978	30124480	chr6_30123979_30124480
chr2	113401860	113402362	chr2_113401861_113402362
chr11	68822685	68823187	chr11_68822686_68823187
chr5	40841019	40841521	chr5_40841020_40841521
chr3	50306163	50306859	chr3_50306164_50306665
chr7	73393341	73393843	chr7_73393342_73393843
chr5	14305092	14305594	chr5_14305093_14305594
chr10	5488307	5488809	chr10_5488308_5488809
chr20	31062659	31063578	chr20_31063077_31063578
chr5	39256420	39256922	chr5_39256421_39256922
chr20	62168540	62169670	chr20_62169169_62169670
chr3	170048874	170049376	chr3_170048875_170049376
chr7	100887427	100888628	chr7_100888127_100888628
chr11	73018340	73019125	chr11_73018624_73019125
chr2	228410726	228411403	chr2_228410727_228411228
chr1	154943033	154943535	chr1_154943034_154943535
chr16	57338041	57338543	chr16_57338042_57338543
chr7	44678729	44679231	chr7_44678730_44679231
chr7	92076487	92076989	chr7_92076488_92076989
chrX	152989811	152990591	chrX_152989812_152990313
chr1	47655687	47656354	chr1_47655688_47656189
chr15	42684701	42685203	chr15_42684702_42685203
chr12	12956077	12956579	chr12_12956078_12956579
chr12	48213564	48214262	chr12_48213565_48214066
chr17	79884154	79884879	chr17_79884155_79884656
chr7	92392825	92393327	chr7_92392826_92393327
chr17	57407839	57408341	chr17_57407840_57408341
chr16	31484070	31484572	chr16_31484071_31484572
chr9	33185822	33186324	chr9_33185823_33186324
chr9	124048830	124050055	chr9_124049189_124049690
chr11	67331125	67331627	chr11_67331126_67331627
chr11	34255553	34256374	chr11_34255873_34256374
chr14	100706633	100707135	chr14_100706634_100707135
chr7	73374807	73375309	chr7_73374808_73375309
chr11	75041206	75041708	chr11_75041207_75041708
chr7	92327763	92328265	chr7_92327764_92328265
chr1	151973961	151974463	chr1_151973962_151974463
chr6	41025516	41026018	chr6_41025517_41026018
chr20	32030977	32031915	chr20_32031414_32031915
chr7	89975707	89976494	chr7_89975708_89976209
chr20	62170010	62170512	chr20_62170011_62170512
chr12	52615724	52616226	chr12_52615725_52616226
chr11	68606550	68607202	chr11_68606551_68607052
chr11	61739178	61739680	chr11_61739179_61739680
chr1	156030659	156031161	chr1_156030660_156031161
chr17	39810290	39810792	chr17_39810291_39810792
chr11	67397694	67398472	chr11_67397695_67398196
chr7	89699483	89699985	chr7_89699484_89699985
chr20	30148535	30149037	chr20_30148536_30149037
chr5	850553	851055	chr5_850554_851055
chr20	30181094	30181962	chr20_30181095_30181596
chr5	102769812	102770314	chr5_102769813_102770314
chr8	101321575	101322975	chr8_101322067_101322568
chr19	47731090	47731592	chr19_47731091_47731592
chr11	68624964	68625466	chr11_68624965_68625466
chr1	223902951	223903453	chr1_223902952_223903453
chr16	30345909	30346991	chr16_30345910_30346411
chr9	35186508	35187010	chr9_35186509_35187010
chr11	64140322	64141249	chr11_64140323_64140824
chr19	49004640	49005792	chr19_49005291_49005792
chr8	145692952	145693454	chr8_145692953_145693454
chr15	91400496	91400998	chr15_91400497_91400998
chr11	68579913	68580415	chr11_68579914_68580415
chr21	42934013	42934515	chr21_42934014_42934515
chr7	73265747	73266249	chr7_73265748_73266249
chr20	56268009	56268792	chr20_56268010_56268511
chr7	72971285	72972570	chr7_72971286_72971787
chr6	33557884	33558386	chr6_33557885_33558386
chr5	42944995	42945497	chr5_42944996_42945497
chr11	71791523	71792025	chr11_71791524_71792025
chr12	96026931	96027433	chr12_96026932_96027433
chr6	30130705	30131515	chr6_30130842_30131343
chr3	184279017	184279693	chr3_184279192_184279693
chr11	75445539	75446260	chr11_75445759_75446260
chr11	72905608	72906110	chr11_72905609_72906110
chr3	10233641	10234143	chr3_10233642_10234143
chr1	151482437	151482939	chr1_151482438_151482939
chr11	67890396	67890898	chr11_67890397_67890898
chr6	32938422	32938924	chr6_32938423_32938924
chr5	890925	891687	chr5_891186_891687
chr16	2906228	2906730	chr16_2906229_2906730
chr7	107939578	107940080	chr7_107939579_107940080
chr4	100191187	100191689	chr4_100191188_100191689
chr7	89858940	89859442	chr7_89858941_89859442
chr11	76774379	76774881	chr11_76774380_76774881
chr2	74922784	74923286	chr2_74922785_74923286
chr8	143757444	143757946	chr8_143757445_143757946
chr4	8535646	8536335	chr4_8535834_8536335
chr3	170025653	170026155	chr3_170025654_170026155
chr3	182983749	182984251	chr3_182983750_182984251
chr11	61523822	61524695	chr11_61524194_61524695
chr6	33282181	33282683	chr6_33282182_33282683
chr20	30310485	30312022	chr20_30311224_30311725
chr7	73707012	73707514	chr7_73707013_73707514
chr1	20822625	20823127	chr1_20822626_20823127
chr1	202075386	202076177	chr1_202075387_202075888
chr7	100743352	100743854	chr7_100743353_100743854
chr17	39678054	39679144	chr17_39678055_39678556
chr11	76302275	76302777	chr11_76302276_76302777
chr8	126203950	126204452	chr8_126203951_126204452
chr1	156075994	156076496	chr1_156075995_156076496
chr3	38034116	38034618	chr3_38034117_38034618
chr8	143761572	143762309	chr8_143761573_143762074
chr7	108168654	108169156	chr7_108168655_108169156
chr16	3208542	3209044	chr16_3208543_3209044
chr11	68811419	68812122	chr11_68811621_68812122
chr19	45350789	45351291	chr19_45350790_45351291
chr20	34195226	34195728	chr20_34195227_34195728
chr22	38559959	38560461	chr22_38559960_38560461
chr17	55498471	55498973	chr17_55498472_55498973
chr21	44726913	44727415	chr21_44726914_44727415
chr19	49841779	49843087	chr19_49842586_49843087
chr11	65264685	65265443	chr11_65264942_65265443
chr11	45944841	45945343	chr11_45944842_45945343
chr13	31404640	31405142	chr13_31404641_31405142
chr6	30059459	30060295	chr6_30059460_30059961
chr16	23741058	23741560	chr16_23741059_23741560
chr7	99516479	99517482	chr7_99516981_99517482
chr13	21134699	21135201	chr13_21134700_21135201
chr12	52542232	52542734	chr12_52542233_52542734
chr20	30181094	30181962	chr20_30181461_30181962
chr11	67981026	67981528	chr11_67981027_67981528
chr9	21831985	21832487	chr9_21831986_21832487
chr17	79702515	79703017	chr17_79702516_79703017
chr11	67182473	67182975	chr11_67182474_67182975
chr15	42349133	42350112	chr15_42349611_42350112
chr16	30751638	30752391	chr16_30751639_30752140
chr11	74176367	74176869	chr11_74176368_74176869
chr3	184276996	184277498	chr3_184276997_184277498
chr2	110858731	110859445	chr2_110858944_110859445
chr9	22088583	22089085	chr9_22088584_22089085
chr11	67236595	67237097	chr11_67236596_67237097
chr16	30907348	30907850	chr16_30907349_30907850
chr15	80881024	80881526	chr15_80881025_80881526
chr7	99435529	99436031	chr7_99435530_99436031
chr7	90040764	90041266	chr7_90040765_90041266
chr11	69416076	69416578	chr11_69416077_69416578
chr1	10819474	10820258	chr1_10819475_10819976
chr9	110251628	110252832	chr9_110251892_110252393
chr2	157191980	157192482	chr2_157191981_157192482
chr7	100806070	100806572	chr7_100806071_100806572
chr11	69455689	69456191	chr11_69455690_69456191
chr17	76136052	76137089	chr17_76136406_76136907
chr3	149186219	149186721	chr3_149186220_149186721
chr20	35931961	35932463	chr20_35931962_35932463
chr20	30160303	30161420	chr20_30160598_30161099
chr5	42887176	42887678	chr5_42887177_42887678
chr22	19946784	19947286	chr22_19946785_19947286
chr6	151362038	151362540	chr6_151362039_151362540
chr1	208356175	208356677	chr1_208356176_208356677
chr12	53321008	53321510	chr12_53321009_53321510
chr1	154944990	154945492	chr1_154944991_154945492
chr3	182962853	182963355	chr3_182962854_182963355
chr15	77361937	77362439	chr15_77361938_77362439
chr2	190365555	190366057	chr2_190365556_190366057
chr9	124048830	124050055	chr9_124049554_124050055
chr11	2933692	2934550	chr11_2933693_2934194
chr11	118800090	118800592	chr11_118800091_118800592
chr4	75096858	75097360	chr4_75096859_75097360
chr4	53617135	53618124	chr4_53617623_53618124
chr11	19450155	19450657	chr11_19450156_19450657
chr20	33293097	33293934	chr20_33293098_33293599
chr16	30131561	30132063	chr16_30131562_30132063
chr7	50494305	50494807	chr7_50494306_50494807
chr20	44600333	44601398	chr20_44600334_44600835
chr1	44013872	44014374	chr1_44013873_44014374
chr1	33472755	33473257	chr1_33472756_33473257
chr7	23505042	23505544	chr7_23505043_23505544
chr8	145550321	145550823	chr8_145550322_145550823
chr6	3258896	3259638	chr6_3258897_3259398
chr20	62313765	62314267	chr20_62313766_62314267
chr1	156474603	156475496	chr1_156474995_156475496
chr7	89874191	89874693	chr7_89874192_89874693
chr7	99606060	99606562	chr7_99606061_99606562
chr17	7166318	7166820	chr17_7166319_7166820
chr11	67187928	67189044	chr11_67188543_67189044
chr12	52629680	52630182	chr12_52629681_52630182
chr17	46985470	46985972	chr17_46985471_46985972
chr3	172406311	172406813	chr3_172406312_172406813
chr11	72852737	72854015	chr11_72853325_72853826
chr9	22041763	22042265	chr9_22041764_22042265
chr20	47894462	47895280	chr20_47894463_47894964
chr8	48388854	48389356	chr8_48388855_48389356
chr19	39897134	39897636	chr19_39897135_39897636
chr17	27073593	27074721	chr17_27073594_27074095
chr19	55591449	55592331	chr19_55591450_55591951
chr15	40294399	40294901	chr15_40294400_40294901
chr7	100720548	100721311	chr7_100720810_100721311
chr2	47587400	47587902	chr2_47587401_47587902
chr19	39889141	39889643	chr19_39889142_39889643
chr8	48281833	48282335	chr8_48281834_48282335
chr6	31913119	31913915	chr6_31913414_31913915
chr17	76330652	76331154	chr17_76330653_76331154
chr1	183439223	183439725	chr1_183439224_183439725
chr1	156473024	156473526	chr1_156473025_156473526
chr20	52686895	52687397	chr20_52686896_52687397
chr17	76194928	76195430	chr17_76194929_76195430
chr7	99591622	99592124	chr7_99591623_99592124
chr5	38599006	38599508	chr5_38599007_38599508
chr11	62327953	62328455	chr11_62327954_62328455
chr17	73074864	73075366	chr17_73074865_73075366
chr19	51505786	51506288	chr19_51505787_51506288
chr3	189114709	189115211	chr3_189114710_189115211
chr12	52562072	52562574	chr12_52562073_52562574
chr20	34203676	34204604	chr20_34204103_34204604
chr19	55677297	55678705	chr19_55677821_55678322
chr2	47496377	47497321	chr2_47496820_47497321
chr11	63948945	63949447	chr11_63948946_63949447
chr5	38854077	38854579	chr5_38854078_38854579
chr20	33914836	33915338	chr20_33914837_33915338
chr7	100738040	100738542	chr7_100738041_100738542
chr2	74919028	74919530	chr2_74919029_74919530
chr11	75132912	75133753	chr11_75133252_75133753
chr14	74238428	74238930	chr14_74238429_74238930
chr19	45268165	45268667	chr19_45268166_45268667
chr1	156471009	156471511	chr1_156471010_156471511
chr7	77304136	77304638	chr7_77304137_77304638
chr20	30191845	30192347	chr20_30191846_30192347
chr6	26052862	26053364	chr6_26052863_26053364
chr19	3285716	3286218	chr19_3285717_3286218
chr5	10353552	10354054	chr5_10353553_10354054
chr7	44787824	44788925	chr7_44788086_44788587
chr7	23762111	23762613	chr7_23762112_23762613
chr3	48700954	48701815	chr3_48700955_48701456
chr7	29602349	29604099	chr7_29603122_29603623
chr20	1309621	1310123	chr20_1309622_1310123
chr3	182984895	182985397	chr3_182984896_182985397
chr11	74257777	74258279	chr11_74257778_74258279
chr7	99573236	99574080	chr7_99573579_99574080
chr20	30190584	30191086	chr20_30190585_30191086
chr1	155162409	155163980	chr1_155163091_155163592
chr20	32890360	32891451	chr20_32890950_32891451
chr11	69488948	69490440	chr11_69489939_69490440
chr5	1093394	1093896	chr5_1093395_1093896
chr8	48739018	48739520	chr8_48739019_48739520
chr20	3792304	3792806	chr20_3792305_3792806
chr17	38296224	38297268	chr17_38296225_38296726
chr19	2034549	2035617	chr19_2034786_2035287
chr7	92218915	92219977	chr7_92219476_92219977
chr1	159894133	159894635	chr1_159894134_159894635
chr20	62497010	62497512	chr20_62497011_62497512
chr17	57408689	57409191	chr17_57408690_57409191
chr6	2960567	2961069	chr6_2960568_2961069
chr9	19404274	19404776	chr9_19404275_19404776
chr6	30068464	30068966	chr6_30068465_30068966
chr11	69715183	69715685	chr11_69715184_69715685
chr19	14608202	14608704	chr19_14608203_14608704
chr4	48095870	48096372	chr4_48095871_48096372
chr17	39845393	39845895	chr17_39845394_39845895
chr20	62176445	62177242	chr20_62176446_62176947
chr2	42283015	42283517	chr2_42283016_42283517
chr9	35111451	35111953	chr9_35111452_35111953
chr19	6765972	6766474	chr19_6765973_6766474
chr1	214724190	214725482	chr1_214724981_214725482
chr11	75497424	75497926	chr11_75497425_75497926
chr9	33229305	33229807	chr9_33229306_33229807
chr2	74600194	74600696	chr2_74600195_74600696
chr20	3725552	3726054	chr20_3725553_3726054
chr19	47931386	47931888	chr19_47931387_47931888
chr13	43632359	43632861	chr13_43632360_43632861
chr11	62320542	62321342	chr11_62320841_62321342
chr1	154946024	154947674	chr1_154946702_154947203
chr19	6372949	6373723	chr19_6373222_6373723
chr7	29409650	29410581	chr7_29410080_29410581
chr11	65186039	65186856	chr11_65186355_65186856
chr14	74262632	74263134	chr14_74262633_74263134
chr7	35043266	35043768	chr7_35043267_35043768
chr11	65183734	65184236	chr11_65183735_65184236
chr1	2509667	2510169	chr1_2509668_2510169
chr7	95060136	95060638	chr7_95060137_95060638
chr15	41253108	41253610	chr15_41253109_41253610
chr19	18175462	18175964	chr19_18175463_18175964
chr11	65186039	65186856	chr11_65186040_65186541
chr8	101315834	101316336	chr8_101315835_101316336
chr1	167051828	167052330	chr1_167051829_167052330
chr10	95218469	95218971	chr10_95218470_95218971
chr19	30335034	30336284	chr19_30335783_30336284
chr16	89555500	89556002	chr16_89555501_89556002
chr16	31142152	31142654	chr16_31142153_31142654
chr4	53739292	53739794	chr4_53739293_53739794
chr20	33166859	33167615	chr20_33166860_33167361
chr7	73241969	73242958	chr7_73242457_73242958
chr1	156470453	156470955	chr1_156470454_156470955
chr9	33211295	33212532	chr9_33211597_33212098
chr17	73042612	73043397	chr17_73042896_73043397
chr20	47804219	47805276	chr20_47804775_47805276
chr1	161053151	161053653	chr1_161053152_161053653
chr11	75035137	75035639	chr11_75035138_75035639
chr11	67195373	67196154	chr11_67195653_67196154
chr15	40390858	40391360	chr15_40390859_40391360
chr14	34521750	34522252	chr14_34521751_34522252
chr11	67914403	67914905	chr11_67914404_67914905
chr7	99620213	99620715	chr7_99620214_99620715
chr11	65254912	65255414	chr11_65254913_65255414
chr11	67373760	67374559	chr11_67374058_67374559
chr12	53289059	53289561	chr12_53289060_53289561
chr19	10402912	10403414	chr19_10402913_10403414
chr1	155151965	155152467	chr1_155151966_155152467
chr1	159899204	159899706	chr1_159899205_159899706
chr8	101408143	101408645	chr8_101408144_101408645
chr1	154904263	154905035	chr1_154904534_154905035
chr6	30488821	30489323	chr6_30488822_30489323
chr7	73153031	73153533	chr7_73153032_73153533
chr21	43126697	43127199	chr21_43126698_43127199
chr3	189110667	189111169	chr3_189110668_189111169
chr21	42879575	42880935	chr21_42879878_42880379
chr1	155107436	155107938	chr1_155107437_155107938
chr1	201430226	201430728	chr1_201430227_201430728
chr18	19315106	19315971	chr18_19315470_19315971
chr7	97714891	97715393	chr7_97714892_97715393
chr6	27720811	27721313	chr6_27720812_27721313
chr9	33329915	33330417	chr9_33329916_33330417
chr5	34466627	34467129	chr5_34466628_34467129
chr11	68608267	68608769	chr11_68608268_68608769
chr2	128458086	128458588	chr2_128458087_128458588
chr16	2907782	2909252	chr16_2908478_2908979
chr15	91412855	91413357	chr15_91412856_91413357
chr8	110436880	110437382	chr8_110436881_110437382
chr11	118965041	118966560	chr11_118966059_118966560
chr1	10839844	10840346	chr1_10839845_10840346
chr16	2955312	2956193	chr16_2955313_2955814
chr20	36793548	36794050	chr20_36793549_36794050
chrX	152735391	152736673	chrX_152735912_152736413
chr17	76311444	76311946	chr17_76311445_76311946
chr1	155100095	155100597	chr1_155100096_155100597
chr16	30107402	30107904	chr16_30107403_30107904
chr17	39684425	39684927	chr17_39684426_39684927
chr3	170052592	170053094	chr3_170052593_170053094
chr16	29605789	29607132	chr16_29606631_29607132
chr7	97735412	97736774	chr7_97735860_97736361
chr11	76571598	76572674	chr11_76571599_76572100
chr9	22098620	22099122	chr9_22098621_22099122
chr16	30907887	30908733	chr16_30908232_30908733
chr17	76183127	76183629	chr17_76183128_76183629
chr17	46678971	46679473	chr17_46678972_46679473
chr1	207489873	207490375	chr1_207489874_207490375
chr11	70005652	70006548	chr11_70005653_70006154
chr2	85812074	85812878	chr2_85812075_85812576
chr3	172409104	172409606	chr3_172409105_172409606
chr20	44883981	44884483	chr20_44883982_44884483
chr7	99437215	99437717	chr7_99437216_99437717
chr20	31053314	31053816	chr20_31053315_31053816
chr6	24504879	24505381	chr6_24504880_24505381
chr1	155101459	155101961	chr1_155101460_155101961
chr7	100781682	100782184	chr7_100781683_100782184
chr1	94083111	94083613	chr1_94083112_94083613
chr14	67708266	67708768	chr14_67708267_67708768
chr11	75236450	75237287	chr11_75236786_75237287
chr15	80888770	80889272	chr15_80888771_80889272
chr3	149057638	149058140	chr3_149057639_149058140
chr1	208374532	208375034	chr1_208374533_208375034
chr1	209825628	209826130	chr1_209825629_209826130
chr4	52886353	52886855	chr4_52886354_52886855
chr19	4052320	4052822	chr19_4052321_4052822
chr1	156023388	156024192	chr1_156023389_156023890
chr21	43099037	43099539	chr21_43099038_43099539
chr6	30687779	30688281	chr6_30687780_30688281
chr11	76746535	76747037	chr11_76746536_76747037
chr1	183129028	183129530	chr1_183129029_183129530
chr11	67177482	67177984	chr11_67177483_67177984
chr17	38474171	38474673	chr17_38474172_38474673
chr11	69311907	69312409	chr11_69311908_69312409
chr1	155164455	155164957	chr1_155164456_155164957
chr10	124110308	124110810	chr10_124110309_124110810
chr16	2264700	2265412	chr16_2264701_2265202
chr19	55718446	55718948	chr19_55718447_55718948
chr16	31153485	31154376	chr16_31153486_31153987
chr20	32307933	32308435	chr20_32307934_32308435
chr17	39686304	39686806	chr17_39686305_39686806
chr1	164620480	164621298	chr1_164620797_164621298
chr20	32321524	32322026	chr20_32321525_32322026
chr19	49141306	49141808	chr19_49141307_49141808
chr11	62623253	62623755	chr11_62623254_62623755
chr8	48265739	48266241	chr8_48265740_48266241
chr11	76756969	76757471	chr11_76756970_76757471
chr1	207193336	207193838	chr1_207193337_207193838
chr8	104426717	104428070	chr8_104427166_104427667
chr7	73097268	73098066	chr7_73097565_73098066
chr11	68742074	68742576	chr11_68742075_68742576
chr20	34127489	34127991	chr20_34127490_34127991
chr1	26677982	26678484	chr1_26677983_26678484
chr17	76958313	76958815	chr17_76958314_76958815
chr11	75139191	75139693	chr11_75139192_75139693
chr22	36699861	36700363	chr22_36699862_36700363
chr19	3006093	3006595	chr19_3006094_3006595
chr12	95598113	95598615	chr12_95598114_95598615
chr6	138132480	138132982	chr6_138132481_138132982
chr20	30307072	30307574	chr20_30307073_30307574
chr9	22008522	22009596	chr9_22009095_22009596
chr11	72938830	72939332	chr11_72938831_72939332
chr7	38199631	38200133	chr7_38199632_38200133
chr2	27578886	27580174	chr2_27579673_27580174
chr20	30249291	30249793	chr20_30249292_30249793
chr1	55261777	55262279	chr1_55261778_55262279
chr20	61586908	61587410	chr20_61586909_61587410
chr19	55586925	55587427	chr19_55586926_55587427
chr11	67346926	67347428	chr11_67346927_67347428
chr8	104220103	104220605	chr8_104220104_104220605
chr2	47596064	47596566	chr2_47596065_47596566
chr10	70982316	70982818	chr10_70982317_70982818
chr18	19179967	19181386	chr18_19180531_19181032
chr6	3363475	3363977	chr6_3363476_3363977
chr19	18746725	18747450	chr19_18746949_18747450
chr1	151485964	151486728	chr1_151486227_151486728
chr8	145547645	145548147	chr8_145547646_145548147
chr19	11376343	11376845	chr19_11376344_11376845
chr5	150462836	150463338	chr5_150462837_150463338
chr12	52426620	52427122	chr12_52426621_52427122
chr19	55849962	55850464	chr19_55849963_55850464
chr8	143809609	143810111	chr8_143809610_143810111
chr3	184032137	184033160	chr3_184032138_184032639
chr8	145673688	145674190	chr8_145673689_145674190
chr11	65236246	65236748	chr11_65236247_65236748
chr8	86463991	86464493	chr8_86463992_86464493
chr3	149191391	149191893	chr3_149191392_149191893
chr17	46948894	46949396	chr17_46948895_46949396
chr5	149891293	149891795	chr5_149891294_149891795
chr7	72992815	72993317	chr7_72992816_72993317
chr17	79980722	79981224	chr17_79980723_79981224
chr7	48127681	48129400	chr7_48128391_48128892
chr20	33264327	33265246	chr20_33264745_33265246
chr19	43969572	43970074	chr19_43969573_43970074
chr19	47777240	47778579	chr19_47777241_47777742
chr8	145703117	145703912	chr8_145703118_145703619
chr1	156542156	156542658	chr1_156542157_156542658
chr15	45406163	45406665	chr15_45406164_45406665
chr5	34686864	34687784	chr5_34686865_34687366
chr7	107652903	107653405	chr7_107652904_107653405
chr21	44866039	44866833	chr21_44866040_44866541
chr20	61276400	61276902	chr20_61276401_61276902
chr16	29984799	29985301	chr16_29984800_29985301
chr11	64622360	64622862	chr11_64622361_64622862
chr1	201374467	201374969	chr1_201374468_201374969
chr16	31146818	31147320	chr16_31146819_31147320
chr11	34264712	34265633	chr11_34265132_34265633
chr17	79818455	79818957	chr17_79818456_79818957
chr7	44620977	44622621	chr7_44621649_44622150
chr16	85646519	85647021	chr16_85646520_85647021
chr20	47893941	47894443	chr20_47893942_47894443
chr20	35579487	35580428	chr20_35579927_35580428
chr7	73121493	73121995	chr7_73121494_73121995
chr11	71813827	71814663	chr11_71814162_71814663
chr11	76777072	76777574	chr11_76777073_76777574
chr19	13095926	13096428	chr19_13095927_13096428
chr7	36330996	36331498	chr7_36330997_36331498
chr20	47894462	47895280	chr20_47894779_47895280
chr22	19949781	19950940	chr22_19950439_19950940
chr6	26021476	26022433	chr6_26021477_26021978
chr11	65418966	65419468	chr11_65418967_65419468
chr7	77321385	77321887	chr7_77321386_77321887
chr19	18630869	18631371	chr19_18630870_18631371
chr3	172574848	172575350	chr3_172574849_172575350
chr12	53300891	53301393	chr12_53300892_53301393
chr21	42932597	42933099	chr21_42932598_42933099
chr6	31846535	31847037	chr6_31846536_31847037
chr20	47562410	47562912	chr20_47562411_47562912
chr7	44645904	44646718	chr7_44646217_44646718
chr7	77325404	77325906	chr7_77325405_77325906
chr17	57922916	57923418	chr17_57922917_57923418
chr20	32274123	32274625	chr20_32274124_32274625
chr8	145980637	145981139	chr8_145980638_145981139
chr20	56193067	56193569	chr20_56193068_56193569
chr16	28834823	28835976	chr16_28835119_28835620
chr6	151038511	151039013	chr6_151038512_151039013
chr1	161359557	161360517	chr1_161359558_161360059
chr11	712747	713249	chr11_712748_713249
chr1	211821619	211822121	chr1_211821620_211822121
chr1	156721335	156721837	chr1_156721336_156721837
chr11	118991924	118992901	chr11_118991925_118992426
chr10	105667761	105668468	chr10_105667967_105668468
chr2	228682768	228683270	chr2_228682769_228683270
chr20	33893428	33893930	chr20_33893429_33893930
chr1	207406015	207406517	chr1_207406016_207406517
chr11	65239462	65239964	chr11_65239463_65239964
chr7	48183821	48184323	chr7_48183822_48184323
chr1	10815923	10816425	chr1_10815924_10816425
chr14	24615751	24616253	chr14_24615752_24616253
chr19	6730337	6730839	chr19_6730338_6730839
chr3	38032545	38033047	chr3_38032546_38033047
chr19	49198936	49199885	chr19_49198937_49199438
chr2	97222199	97222969	chr2_97222468_97222969
chr6	31845336	31845838	chr6_31845337_31845838
chr11	70245778	70246280	chr11_70245779_70246280
chr8	124549804	124550306	chr8_124549805_124550306
chr22	43522776	43523278	chr22_43522777_43523278
chr20	61583776	61584278	chr20_61583777_61584278
chr12	53342573	53343075	chr12_53342574_53343075
chr1	203259503	203260005	chr1_203259504_203260005
chr11	75095478	75095980	chr11_75095479_75095980
chr19	18391010	18391512	chr19_18391011_18391512
chr5	38636664	38637166	chr5_38636665_38637166
chr11	68722694	68723196	chr11_68722695_68723196
chr12	49741427	49741929	chr12_49741428_49741929
chr6	3160356	3160858	chr6_3160357_3160858
chr4	154126853	154127355	chr4_154126854_154127355
chr19	11199899	11200401	chr19_11199900_11200401
chr17	57914732	57915357	chr17_57914856_57915357
chr11	67442000	67442502	chr11_67442001_67442502
chr14	95064991	95066399	chr14_95065454_95065955
chr11	129152975	129153477	chr11_129152976_129153477
chr11	65374181	65374932	chr11_65374431_65374932
chr20	44440872	44441796	chr20_44440873_44441374
chr1	156441234	156441736	chr1_156441235_156441736
chr5	38845696	38846578	chr5_38845697_38846198
chr11	61515064	61515566	chr11_61515065_61515566
chr9	35072467	35072969	chr9_35072468_35072969
chr19	44179484	44179986	chr19_44179485_44179986
chr1	202076354	202076856	chr1_202076355_202076856
chr6	160211146	160211648	chr6_160211147_160211648
chr11	61519781	61520283	chr11_61519782_61520283
chr8	145654661	145655163	chr8_145654662_145655163
chr20	34205459	34205961	chr20_34205460_34205961
chr12	48214328	48214830	chr12_48214329_48214830
chr11	67350820	67351459	chr11_67350958_67351459
chr16	75340111	75340613	chr16_75340112_75340613
chr10	89601978	89602480	chr10_89601979_89602480
chr11	67426793	67427295	chr11_67426794_67427295
chr5	175972618	175973120	chr5_175972619_175973120
chr1	201978645	201979898	chr1_201979397_201979898
chr1	43148548	43149050	chr1_43148549_43149050
chr3	184520962	184521464	chr3_184520963_184521464
chr15	41137646	41138507	chr15_41138006_41138507
chr11	64102480	64102982	chr11_64102481_64102982
chr12	97092711	97093213	chr12_97092712_97093213
chr11	118926995	118928313	chr11_118927812_118928313
chr19	49137657	49138159	chr19_49137658_49138159
chr12	48218865	48219367	chr12_48218866_48219367
chr7	44677576	44678078	chr7_44677577_44678078
chr1	161135560	161136412	chr1_161135911_161136412
chr20	35807180	35808238	chr20_35807181_35807682
chr11	118800808	118801310	chr11_118800809_118801310
chr1	154989741	154990243	chr1_154989742_154990243
chr7	97739866	97740368	chr7_97739867_97740368
chr14	20886593	20887095	chr14_20886594_20887095
chr19	4539859	4540361	chr19_4539860_4540361
chr5	162861326	162861828	chr5_162861327_162861828
chr2	74684518	74685020	chr2_74684519_74685020
chr13	31317699	31318201	chr13_31317700_31318201
chr20	62495421	62495923	chr20_62495422_62495923
chr15	41198192	41198966	chr15_41198465_41198966
chr9	108061671	108062173	chr9_108061672_108062173
chr1	160990884	160991386	chr1_160990885_160991386
chr1	45272857	45273790	chr1_45272858_45273359
chr20	62165315	62165817	chr20_62165316_62165817
chr12	120130728	120131230	chr12_120130729_120131230
chr19	45245106	45245608	chr19_45245107_45245608
chr7	73207866	73208368	chr7_73207867_73208368
chr16	8962371	8963229	chr16_8962728_8963229
chr20	55204993	55205495	chr20_55204994_55205495
chr1	207205639	207206403	chr1_207205902_207206403
chr6	30523852	30525004	chr6_30524148_30524649
chr9	100908391	100908893	chr9_100908392_100908893
chr3	169755604	169756106	chr3_169755605_169756106
chr20	32241895	32242397	chr20_32241896_32242397
chr17	49230559	49231395	chr17_49230560_49231061
chr7	17139011	17139513	chr7_17139012_17139513
chr16	2955312	2956193	chr16_2955692_2956193
chr11	2800434	2800936	chr11_2800435_2800936
chr11	67776011	67776513	chr11_67776012_67776513
chr2	113449969	113450471	chr2_113449970_113450471
chr8	95204033	95204535	chr8_95204034_95204535
chr17	38256762	38257755	chr17_38256763_38257264
chr1	207200506	207201008	chr1_207200507_207201008
chr16	68269877	68270379	chr16_68269878_68270379
chr13	52553024	52553526	chr13_52553025_52553526
chr10	105812199	105812701	chr10_105812200_105812701
chr7	44601811	44602313	chr7_44601812_44602313
chr7	44801293	44801795	chr7_44801294_44801795
chr20	34204666	34205168	chr20_34204667_34205168
chr20	62525611	62526593	chr20_62526092_62526593
chr1	151812062	151812906	chr1_151812063_151812564
chr20	35971890	35972392	chr20_35971891_35972392
chr6	32939304	32940261	chr6_32939305_32939806
chr16	57299895	57300397	chr16_57299896_57300397
chr22	41844122	41844826	chr22_41844325_41844826
chr1	226233915	226234417	chr1_226233916_226234417
chr6	26056444	26056946	chr6_26056445_26056946
chr20	56284872	56285374	chr20_56284873_56285374
chr10	104263386	104263888	chr10_104263387_104263888
chr8	95254221	95254723	chr8_95254222_95254723
chr7	73187873	73188375	chr7_73187874_73188375
chr6	31782266	31782768	chr6_31782267_31782768
chr12	133380942	133381444	chr12_133380943_133381444
chr14	78088853	78089355	chr14_78088854_78089355
chr9	97567853	97568355	chr9_97567854_97568355
chr22	47004995	47005497	chr22_47004996_47005497
chr9	35115697	35116730	chr9_35115698_35116199
chr1	16126548	16127050	chr1_16126549_16127050
chr9	110349458	110350300	chr9_110349799_110350300
chr16	67438577	67439079	chr16_67438578_67439079
chr15	45742041	45742543	chr15_45742042_45742543
chr11	67397152	67397654	chr11_67397153_67397654
chr17	76313493	76313995	chr17_76313494_76313995
chr11	73881934	73882436	chr11_73881935_73882436
chr20	60813147	60813649	chr20_60813148_60813649
chr10	6341175	6341677	chr10_6341176_6341677
chr1	156631037	156631539	chr1_156631038_156631539
chr20	30192729	30193509	chr20_30192730_30193231
chr17	76310107	76310779	chr17_76310108_76310609
chr16	68420453	68420955	chr16_68420454_68420955
chr11	75037068	75037570	chr11_75037069_75037570
chr11	67350055	67350557	chr11_67350056_67350557
chr17	66097525	66098305	chr17_66097526_66098027
chr11	64019721	64020223	chr11_64019722_64020223
chr11	64038742	64039244	chr11_64038743_64039244
chr14	90863020	90863522	chr14_90863021_90863522
chr20	30467314	30468180	chr20_30467315_30467816
chr20	44407612	44408517	chr20_44407613_44408114
chr2	27309237	27309739	chr2_27309238_27309739
chr14	24563169	24564019	chr14_24563170_24563671
chr1	155055434	155055936	chr1_155055435_155055936
chr11	2950711	2951213	chr11_2950712_2951213
chr1	156094894	156095396	chr1_156094895_156095396
chr5	135416122	135416624	chr5_135416123_135416624
chr2	85640930	85641432	chr2_85640931_85641432
chr14	90849411	90849913	chr14_90849412_90849913
chr11	75051611	75052113	chr11_75051612_75052113
chr1	160068240	160069074	chr1_160068573_160069074
chr19	49197678	49198180	chr19_49197679_49198180
chr15	91497809	91498706	chr15_91497810_91498311
chr1	159930436	159931237	chr1_159930437_159930938
chr12	52430535	52431037	chr12_52430536_52431037
chr19	50030915	50031417	chr19_50030916_50031417
chr19	49285605	49286107	chr19_49285606_49286107
chr9	22117992	22118494	chr9_22117993_22118494
chr6	30850406	30850908	chr6_30850407_30850908
chr17	39652970	39653472	chr17_39652971_39653472
chr1	151485445	151485947	chr1_151485446_151485947
chr3	182817146	182817648	chr3_182817147_182817648
chr19	47729262	47729764	chr19_47729263_47729764
chr3	184283427	184283929	chr3_184283428_184283929
chr11	69639770	69640272	chr11_69639771_69640272
chr1	201449532	201450240	chr1_201449533_201450034
chr2	85580982	85582327	chr2_85581461_85581962
chr10	104182336	104182838	chr10_104182337_104182838
chr16	67051746	67052248	chr16_67051747_67052248
chr7	73038639	73039141	chr7_73038640_73039141
chr1	205718110	205719695	chr1_205718452_205718953
chr16	2924767	2925269	chr16_2924768_2925269
chr6	26189078	26189580	chr6_26189079_26189580
chr7	92053596	92054296	chr7_92053795_92054296
chr1	207182736	207183238	chr1_207182737_207183238
chr17	57183956	57184610	chr17_57184109_57184610
chr16	2932071	2933389	chr16_2932508_2933009
chr7	39772457	39773262	chr7_39772761_39773262
chr10	6317122	6317624	chr10_6317123_6317624
chr16	31143058	31143560	chr16_31143059_31143560
chr9	140330406	140330908	chr9_140330407_140330908
chr17	40259647	40260149	chr17_40259648_40260149
chr10	95205219	95205721	chr10_95205220_95205721
chr9	33329102	33329604	chr9_33329103_33329604
chr15	69886696	69887452	chr15_69886697_69887198
chr17	73284811	73285858	chr17_73285357_73285858
chr19	15666538	15667040	chr19_15666539_15667040
chr11	64614503	64615005	chr11_64614504_64615005
chr11	76806718	76807220	chr11_76806719_76807220
chr17	57906163	57907023	chr17_57906522_57907023
chr17	39700781	39701283	chr17_39700782_39701283
chr21	42738563	42739065	chr21_42738564_42739065
chr8	145721235	145722020	chr8_145721236_145721737
chr8	145747574	145748076	chr8_145747575_145748076
chr20	32900407	32900909	chr20_32900408_32900909
chr11	65318298	65318800	chr11_65318299_65318800
chr11	73309009	73309872	chr11_73309010_73309511
chr3	183003541	183004361	chr3_183003542_183004043
chr16	3109210	3109712	chr16_3109211_3109712
chr1	46151759	46152519	chr1_46152018_46152519
chr6	44204711	44206093	chr6_44205127_44205628
chr2	112677714	112678216	chr2_112677715_112678216
chr1	31320237	31320739	chr1_31320238_31320739
chr17	39807661	39808163	chr17_39807662_39808163
chr16	28857200	28858088	chr16_28857587_28858088
chr19	36235722	36236653	chr19_36236152_36236653
chr11	64036949	64038181	chr11_64037321_64037822
chr7	72935885	72937273	chr7_72936442_72936943
chr16	89571703	89572205	chr16_89571704_89572205
chr8	145641758	145642260	chr8_145641759_145642260
chr7	73139993	73140495	chr7_73139994_73140495
chr7	73081823	73082325	chr7_73081824_73082325
chr16	85648558	85649060	chr16_85648559_85649060
chr6	31707408	31707910	chr6_31707409_31707910
chr11	68778362	68778864	chr11_68778363_68778864
chr11	64901813	64902884	chr11_64902383_64902884
chr6	30712063	30712565	chr6_30712064_30712565
chr7	99155980	99156482	chr7_99155981_99156482
chr10	112158369	112158871	chr10_112158370_112158871
chr1	151803090	151803592	chr1_151803091_151803592
chr17	39844740	39845242	chr17_39844741_39845242
chr11	71823200	71824084	chr11_71823201_71823702
chr19	3708113	3708615	chr19_3708114_3708615
chr1	209829090	209829592	chr1_209829091_209829592
chr8	145726276	145726778	chr8_145726277_145726778
chr9	19397849	19398351	chr9_19397850_19398351
chr1	214680332	214680834	chr1_214680333_214680834
chr15	44067572	44068074	chr15_44067573_44068074
chr13	52769556	52770058	chr13_52769557_52770058
chr1	17231141	17231936	chr1_17231142_17231643
chr11	65121890	65122392	chr11_65121891_65122392
chrX	153637416	153637918	chrX_153637417_153637918
chr16	29827129	29828411	chr16_29827130_29827631
chr2	110371440	110372425	chr2_110371441_110371942
chr20	1310661	1311163	chr20_1310662_1311163
chr15	45722418	45722920	chr15_45722419_45722920
chr11	64656348	64656850	chr11_64656349_64656850
chr20	32398780	32399282	chr20_32398781_32399282
chr3	10240615	10241117	chr3_10240616_10241117
chr1	150980596	150981414	chr1_150980597_150981098
chr12	57481365	57481867	chr12_57481366_57481867
chr8	144349346	144349848	chr8_144349347_144349848
chr11	74204050	74205028	chr11_74204051_74204552
chr7	150759342	150759844	chr7_150759343_150759844
chr20	30326380	30327225	chr20_30326724_30327225
chr1	156719406	156719908	chr1_156719407_156719908
chr11	76758558	76759060	chr11_76758559_76759060
chr16	31159446	31159948	chr16_31159447_31159948
chr3	195603470	195603972	chr3_195603471_195603972
chr20	32077459	32078726	chr20_32077460_32077961
chr1	156695547	156696049	chr1_156695548_156696049
chr1	154973944	154975213	chr1_154974424_154974925
chr16	377241	378099	chr16_377242_377743
chr1	207204028	207204530	chr1_207204029_207204530
chr19	49140672	49141174	chr19_49140673_49141174
chr17	27073003	27073505	chr17_27073004_27073505
chr13	31406918	31407420	chr13_31406919_31407420
chr8	124428295	124429442	chr8_124428587_124429088
chr11	821176	821678	chr11_821177_821678
chr2	113998462	113998964	chr2_113998463_113998964
chr8	145697622	145698124	chr8_145697623_145698124
chr19	39888267	39888769	chr19_39888268_39888769
chr6	31869818	31870320	chr6_31869819_31870320
chr7	16792990	16794309	chr7_16792991_16793492
chr1	201368287	201368789	chr1_201368288_201368789
chr10	5651823	5652325	chr10_5651824_5652325
chr10	5652581	5653083	chr10_5652582_5653083
chr10	90611374	90611876	chr10_90611375_90611876
chr15	77376111	77376613	chr15_77376112_77376613
chr11	62358960	62359802	chr11_62358961_62359462
chr6	33290623	33291558	chr6_33290624_33291125
chr11	62366573	62367075	chr11_62366574_62367075
chr19	45228343	45228845	chr19_45228344_45228845
chrX	153718843	153719345	chrX_153718844_153719345
chr1	154973408	154973910	chr1_154973409_154973910
chr3	184037760	184038262	chr3_184037761_184038262
chr14	38678089	38678591	chr14_38678090_38678591
chr13	20748998	20749500	chr13_20748999_20749500
chr19	18364436	18364938	chr19_18364437_18364938
chr16	31140037	31140834	chr16_31140038_31140539
chr7	36429048	36430260	chr7_36429049_36429550
chr9	133320011	133320513	chr9_133320012_133320513
chr1	211688516	211689213	chr1_211688517_211689018
chr11	73087076	73088756	chr11_73087077_73087578
chr1	208417558	208418060	chr1_208417559_208418060
chr11	119252212	119252714	chr11_119252213_119252714
chr14	24657847	24658349	chr14_24657848_24658349
chr16	81482013	81482515	chr16_81482014_81482515
chr2	85726144	85726646	chr2_85726145_85726646
chr8	86148774	86149276	chr8_86148775_86149276
chr2	9277014	9277982	chr2_9277015_9277516
chr10	43950791	43951519	chr10_43951018_43951519
chr1	33182162	33182664	chr1_33182163_33182664
chr13	52768367	52768869	chr13_52768368_52768869
chr16	30007243	30007745	chr16_30007244_30007745
chr16	67232763	67233265	chr16_67232764_67233265
chr16	30905236	30905738	chr16_30905237_30905738
chr1	156307621	156308818	chr1_156307900_156308401
chr19	54668315	54668817	chr19_54668316_54668817
chr6	24668643	24669145	chr6_24668644_24669145
chr6	86388319	86389345	chr6_86388320_86388821
chr11	65625542	65626044	chr11_65625543_65626044
chr12	69080401	69081212	chr12_69080402_69080903
chr11	70079540	70080042	chr11_70079541_70080042
chr19	45273750	45274252	chr19_45273751_45274252
chr11	2951888	2952390	chr11_2951889_2952390
chr6	3063813	3064795	chr6_3063814_3064315
chr17	57784661	57785163	chr17_57784662_57785163
chr19	33793294	33793796	chr19_33793295_33793796
chr17	57925017	57925519	chr17_57925018_57925519
chr6	36711595	36712097	chr6_36711596_36712097
chr20	30150597	30151099	chr20_30150598_30151099
chr17	17614171	17614673	chr17_17614172_17614673
chr16	75339154	75339656	chr16_75339155_75339656
chr11	64660777	64661279	chr11_64660778_64661279
chr6	52284501	52285327	chr6_52284826_52285327
chr17	79700698	79701200	chr17_79700699_79701200
chr12	120426147	120427954	chr12_120426473_120426974
chr19	49127277	49127779	chr19_49127278_49127779
chr7	36329746	36330248	chr7_36329747_36330248
chr19	10806306	10806808	chr19_10806307_10806808
chr19	2168855	2169357	chr19_2168856_2169357
chr5	172234132	172234634	chr5_172234133_172234634
chr11	76155571	76157114	chr11_76155572_76156073
chr9	35161678	35162527	chr9_35161679_35162180
chr17	73400988	73402112	chr17_73401611_73402112
chr19	34850039	34850541	chr19_34850040_34850541
chr1	94050529	94051031	chr1_94050530_94051031
chr2	46338	46840	chr2_46339_46840
chr19	49118053	49118555	chr19_49118054_49118555
chr19	10654213	10654715	chr19_10654214_10654715
chr19	10676544	10677046	chr19_10676545_10677046
chr6	31926580	31927082	chr6_31926581_31927082
chr1	159880118	159880620	chr1_159880119_159880620
chr11	64645979	64646792	chr11_64645980_64646481
chr1	45139642	45140478	chr1_45139977_45140478
chr16	30772948	30773770	chr16_30773269_30773770
chr16	75150421	75150923	chr16_75150422_75150923
chr19	5827842	5828344	chr19_5827843_5828344
chr1	202074821	202075323	chr1_202074822_202075323
chr1	151138201	151138703	chr1_151138202_151138703
chr14	24900851	24901353	chr14_24900852_24901353
chr22	20067344	20068266	chr22_20067345_20067846
chr2	96873841	96874916	chr2_96874415_96874916
chr11	623895	624397	chr11_623896_624397
chr17	7165651	7166153	chr17_7165652_7166153
chr14	20811233	20811735	chr14_20811234_20811735
chr17	79870514	79871016	chr17_79870515_79871016
chr15	91478172	91479006	chr15_91478173_91478674
chr19	12847548	12848199	chr19_12847698_12848199
chr2	113402782	113403578	chr2_113403077_113403578
chr6	44233031	44233533	chr6_44233032_44233533
chr7	92463047	92463549	chr7_92463048_92463549
chr4	39640086	39641433	chr4_39640435_39640936
chr6	32920779	32921281	chr6_32920780_32921281
chr16	75497652	75498938	chr16_75498437_75498938
chr14	100611417	100611919	chr14_100611418_100611919
chr9	35102952	35103454	chr9_35102953_35103454
chr11	9587500	9588002	chr11_9587501_9588002
chr5	140018714	140019216	chr5_140018715_140019216
chr6	26123065	26123567	chr6_26123066_26123567
chr11	64889501	64890003	chr11_64889502_64890003
chr2	74753173	74753675	chr2_74753174_74753675
chr9	36487592	36488094	chr9_36487593_36488094
chr10	70989065	70989567	chr10_70989066_70989567
chr1	152009254	152009756	chr1_152009255_152009756
chr1	209826288	209826790	chr1_209826289_209826790
chr20	32254043	32255396	chr20_32254394_32254895
chr19	55791379	55791881	chr19_55791380_55791881
chr1	183155053	183155555	chr1_183155054_183155555
chr8	67525408	67525910	chr8_67525409_67525910
chr1	226084741	226085243	chr1_226084742_226085243
chr11	67272644	67273146	chr11_67272645_67273146
chr13	47181834	47182336	chr13_47181835_47182336
chr3	37901810	37902802	chr3_37901811_37902312
chr3	184059631	184060133	chr3_184059632_184060133
chr8	145743058	145743560	chr8_145743059_145743560
chr1	156095955	156096457	chr1_156095956_156096457
chr1	226186952	226187454	chr1_226186953_226187454
chr2	9319906	9320408	chr2_9319907_9320408
chr5	693293	693795	chr5_693294_693795
chr1	209824484	209824986	chr1_209824485_209824986
chr7	64498271	64499659	chr7_64498272_64498773
chr10	6130622	6131124	chr10_6130623_6131124
chr17	76778021	76778810	chr17_76778309_76778810
chr10	104261688	104262873	chr10_104261689_104262190
chr8	99837406	99838534	chr8_99838033_99838534
chr3	188884762	188885264	chr3_188884763_188885264
chr17	7117535	7118037	chr17_7117536_7118037
chr19	55972881	55973383	chr19_55972882_55973383
chr22	31045295	31045797	chr22_31045296_31045797
chr16	75283888	75284390	chr16_75283889_75284390
chr11	62340918	62342241	chr11_62341278_62341779
chr11	69257995	69258497	chr11_69257996_69258497
chr9	19380083	19380874	chr9_19380084_19380585
chr1	226315441	226315943	chr1_226315442_226315943
chr18	19252791	19253293	chr18_19252792_19253293
chr19	11266361	11266863	chr19_11266362_11266863
chr6	31794529	31795550	chr6_31795049_31795550
chr11	67797759	67798611	chr11_67797760_67798261
chr14	20929029	20930288	chr14_20929662_20930163
chr18	19284203	19285049	chr18_19284548_19285049
chr11	65655822	65656324	chr11_65655823_65656324
chr19	909138	909640	chr19_909139_909640
chr16	29822397	29822899	chr16_29822398_29822899
chr12	49524986	49525488	chr12_49524987_49525488
chr8	56986572	56987431	chr8_56986930_56987431
chr3	38028312	38028814	chr3_38028313_38028814
chr11	45868692	45869194	chr11_45868693_45869194
chr17	41150004	41150506	chr17_41150005_41150506
chr9	136127655	136128157	chr9_136127656_136128157
chr4	39528948	39530017	chr4_39528949_39529450

## Sheet: S2C 2x closed regions
chr	start	end
chr11	1213178	1213680	chr11_1213179_1213680
chr4	48904262	48904764	chr4_48904263_48904764
chr1	92149018	92149520	chr1_92149019_92149520
chr17	4498328	4498830	chr17_4498329_4498830
chr5	10457887	10458389	chr5_10457888_10458389
chr10	1195675	1196177	chr10_1195676_1196177
chr18	45728256	45728758	chr18_45728257_45728758
chr14	52535677	52536179	chr14_52535678_52536179
chr22	20230989	20231491	chr22_20230990_20231491
chr10	21805072	21805574	chr10_21805073_21805574
chr19	33300092	33300594	chr19_33300093_33300594
chr5	766366	766868	chr5_766367_766868
chr8	41488114	41488616	chr8_41488115_41488616
chr16	57168832	57169334	chr16_57168833_57169334
chr5	74659421	74659923	chr5_74659422_74659923
chr19	38633004	38633506	chr19_38633005_38633506
chr1	27961421	27961923	chr1_27961422_27961923
chr14	74868016	74868518	chr14_74868017_74868518
chr1	2435975	2436477	chr1_2435976_2436477
chr11	108441625	108442127	chr11_108441626_108442127
chr4	110919917	110920419	chr4_110919918_110920419
chr5	841753	842255	chr5_841754_842255
chr17	17307052	17307554	chr17_17307053_17307554
chr10	112123551	112124053	chr10_112123552_112124053
chr9	137821012	137821514	chr9_137821013_137821514
chr2	16209765	16210267	chr2_16209766_16210267
chr2	163260300	163260802	chr2_163260301_163260802
chr1	40090992	40091494	chr1_40090993_40091494
chr11	33890330	33890832	chr11_33890331_33890832
chr3	152678989	152679491	chr3_152678990_152679491
chr16	85495317	85495819	chr16_85495318_85495819
chr20	44314517	44315019	chr20_44314518_44315019
chr1	164409384	164409886	chr1_164409385_164409886
chr22	37212971	37213473	chr22_37212972_37213473
chr8	24051918	24052420	chr8_24051919_24052420
chr14	97064747	97065249	chr14_97064748_97065249
chr2	98329633	98330135	chr2_98329634_98330135
chr19	34120301	34120803	chr19_34120302_34120803
chr2	128438700	128439202	chr2_128438701_128439202
chr9	136391703	136392205	chr9_136391704_136392205
chr14	78335026	78335528	chr14_78335027_78335528
chr17	77122188	77122690	chr17_77122189_77122690
chr1	31255685	31256187	chr1_31255686_31256187
chr11	32194293	32194795	chr11_32194294_32194795
chr6	39016131	39016633	chr6_39016132_39016633
chr11	116567112	116567614	chr11_116567113_116567614
chr12	27763235	27763737	chr12_27763236_27763737
chr12	52889095	52889597	chr12_52889096_52889597
chr3	184409677	184410179	chr3_184409678_184410179
chr1	43205801	43206303	chr1_43205802_43206303
chr17	3773997	3774499	chr17_3773998_3774499
chr7	73436449	73436951	chr7_73436450_73436951
chr8	70475140	70475642	chr8_70475141_70475642
chr14	95099359	95099861	chr14_95099360_95099861
chr2	241873540	241874042	chr2_241873541_241874042
chr22	37140358	37140860	chr22_37140359_37140860
chr22	43653571	43654073	chr22_43653572_43654073
chr2	21068042	21068544	chr2_21068043_21068544
chr5	172064060	172064562	chr5_172064061_172064562
chr18	45871911	45872413	chr18_45871912_45872413
chr9	136437814	136438316	chr9_136437815_136438316
chr3	44753897	44754399	chr3_44753898_44754399
chr11	1393152	1393654	chr11_1393153_1393654
chr19	35786600	35787102	chr19_35786601_35787102
chr5	172013114	172013616	chr5_172013115_172013616
chr20	6021556	6022058	chr20_6021557_6022058
chr8	131457249	131457751	chr8_131457250_131457751
chr11	72109005	72109507	chr11_72109006_72109507
chr16	81204356	81204858	chr16_81204357_81204858
chr2	119565987	119566489	chr2_119565988_119566489
chr15	81143288	81143790	chr15_81143289_81143790
chr14	96518049	96518551	chr14_96518050_96518551
chr4	6404485	6404987	chr4_6404486_6404987
chr10	116167882	116168384	chr10_116167883_116168384
chr22	36932707	36933209	chr22_36932708_36933209
chr9	139052214	139052716	chr9_139052215_139052716
chr22	42121440	42121942	chr22_42121441_42121942
chr19	52034751	52035253	chr19_52034752_52035253
chr9	36818459	36818961	chr9_36818460_36818961
chr22	19879329	19879831	chr22_19879330_19879831
chr20	25450597	25451099	chr20_25450598_25451099
chr16	88825720	88826222	chr16_88825721_88826222
chr17	3598027	3598529	chr17_3598028_3598529
chr6	160252246	160252748	chr6_160252247_160252748
chr1	23144862	23145364	chr1_23144863_23145364
chr19	54850165	54850667	chr19_54850166_54850667
chr8	1982627	1983129	chr8_1982628_1983129
chr17	7051160	7051662	chr17_7051161_7051662
chr1	16263631	16264133	chr1_16263632_16264133
chr16	31382909	31383411	chr16_31382910_31383411
chr10	112385685	112386187	chr10_112385686_112386187
chr1	20737585	20738087	chr1_20737586_20738087
chr5	175940819	175941321	chr5_175940820_175941321
chr6	25652429	25652931	chr6_25652430_25652931
chr19	45321845	45322347	chr19_45321846_45322347
chr22	43684951	43685453	chr22_43684952_43685453
chr20	6054808	6055310	chr20_6054809_6055310
chr20	48049933	48050435	chr20_48049934_48050435
chr9	139166563	139167065	chr9_139166564_139167065
chr1	31202696	31203198	chr1_31202697_31203198
chr17	4487806	4488308	chr17_4487807_4488308
chr20	21083327	21083829	chr20_21083328_21083829
chr6	134395369	134395871	chr6_134395370_134395871
chr1	2381133	2381635	chr1_2381134_2381635
chr9	136425351	136425853	chr9_136425352_136425853
chr16	57166265	57166767	chr16_57166266_57166767
chr17	46828496	46828998	chr17_46828497_46828998
chr11	10650032	10650534	chr11_10650033_10650534
chr9	136532825	136533327	chr9_136532826_136533327
chr1	31136312	31136814	chr1_31136313_31136814
chr20	3643908	3644410	chr20_3643909_3644410
chr1	230992742	230993244	chr1_230992743_230993244
chr12	52817812	52818314	chr12_52817813_52818314
chr14	74442748	74443250	chr14_74442749_74443250
chr17	35014577	35015079	chr17_35014578_35015079
chr22	40020370	40020872	chr22_40020371_40020872
chr6	3516270	3516772	chr6_3516271_3516772
chr8	124247752	124248254	chr8_124247753_124248254
chr1	37000502	37001004	chr1_37000503_37001004
chr9	139073813	139074315	chr9_139073814_139074315
chr11	65803410	65803912	chr11_65803411_65803912
chr1	26002913	26003415	chr1_26002914_26003415
chr1	170463434	170463936	chr1_170463435_170463936
chr2	31619934	31620436	chr2_31619935_31620436
chr12	4700310	4700812	chr12_4700311_4700812
chr9	90504556	90505058	chr9_90504557_90505058
chr11	33071406	33071908	chr11_33071407_33071908
chr5	150499533	150500035	chr5_150499534_150500035
chr18	45816660	45817162	chr18_45816661_45817162
chr3	137785755	137786257	chr3_137785756_137786257
chr1	162115122	162115624	chr1_162115123_162115624
chr19	33144129	33144631	chr19_33144130_33144631
chr10	1281041	1281543	chr10_1281042_1281543
chr1	26070507	26071009	chr1_26070508_26071009
chr1	109894013	109894515	chr1_109894014_109894515
chr2	241653736	241654238	chr2_241653737_241654238
chr2	128420405	128420907	chr2_128420406_128420907
chr22	23933233	23933735	chr22_23933234_23933735
chr20	44808417	44808919	chr20_44808418_44808919
chr7	155187764	155188266	chr7_155187765_155188266
chr9	133501566	133502068	chr9_133501567_133502068
chr20	25513087	25513589	chr20_25513088_25513589
chr22	37464895	37465397	chr22_37464896_37465397
chr9	101469053	101469555	chr9_101469054_101469555
chr1	23574954	23575456	chr1_23574955_23575456
chr1	17439049	17439551	chr1_17439050_17439551
chr11	116450394	116450896	chr11_116450395_116450896
chr5	134405213	134405715	chr5_134405214_134405715
chr2	119825950	119826452	chr2_119825951_119826452
chr11	2011985	2012487	chr11_2011986_2012487
chr2	241872958	241873460	chr2_241872959_241873460
chr6	3644761	3645263	chr6_3644762_3645263
chr1	6342611	6343113	chr1_6342612_6343113
chr22	37542042	37542544	chr22_37542043_37542544
chr17	35184218	35184720	chr17_35184219_35184720
chr9	34578002	34578504	chr9_34578003_34578504
chr2	241721808	241722310	chr2_241721809_241722310
chr22	39605630	39606132	chr22_39605631_39606132
chr2	102505847	102506349	chr2_102505848_102506349
chr19	34121786	34122288	chr19_34121787_34122288
chr5	176152524	176153026	chr5_176152525_176153026
chr2	71831907	71832409	chr2_71831908_71832409
chr19	35089337	35089839	chr19_35089338_35089839
chr12	66797510	66798012	chr12_66797511_66798012
chr5	178581900	178582402	chr5_178581901_178582402
chr2	16171850	16172352	chr2_16171851_16172352
chr1	13840297	13840799	chr1_13840298_13840799
chr1	2694553	2695055	chr1_2694554_2695055
