# Supplementary material for: Repurposing of KLF5 activates a cell cycle signature during the progression from a precursor state to Oesophageal Adenocarcinoma
Source: bioRxiv preprint, doi:10.1101/2020.02.10.941872, version 2 (2020-08-27)
Supplement: Supplementary Table 4 [file 941872_file08.xlsx]

## Sheet: Legend
Table S4 siKLF5 RNA-seq analysis. Significant differentially expressed genes with siKLF5 treatment (±1.3x, Q-value<0.05)

## Sheet: S4 siKLF5 RNA-seq
test_id	gene_id	gene	locus	sample_1	sample_2	value_1	value_2	log2(fold_change)	test_stat	p_value	q_value	significant
CCL24	CCL24	CCL24	chr7:75441113-75443033	siKLF5	siNT	0	1.05597	inf	#NAME?	5e-05	0.000141705	yes
ALPPL2	ALPPL2	ALPPL2	chr2:233271551-233275424	siKLF5	siNT	0.105892	5.07353	5.58233	8.92491	5e-05	0.000141705	yes
KRT6A	KRT6A	KRT6A	chr12:52880957-52887181	siKLF5	siNT	0.108205	5.1227	5.56507	8.91367	5e-05	0.000141705	yes
ALPP	ALPP	ALPP	chr2:233243347-233247599	siKLF5	siNT	0.12129	3.68975	4.927	8.51023	5e-05	0.000141705	yes
FGF18	FGF18	FGF18	chr5:170846666-170884630	siKLF5	siNT	0.145742	3.99319	4.77605	7.5111	5e-05	0.000141705	yes
KRT17	KRT17	KRT17	chr17:39775691-39780882	siKLF5	siNT	0.898507	19.0673	4.40743	14.1046	5e-05	0.000141705	yes
SPRR1B	SPRR1B	SPRR1B	chr1:153003678-153005376	siKLF5	siNT	0.352387	6.23536	4.14524	4.9582	0.00015	0.000398712	yes
ITGB7	ITGB7	ITGB7	chr12:53585106-53601000	siKLF5	siNT	0.96214	16.97	4.1406	17.0978	5e-05	0.000141705	yes
KLK10	KLK10	KLK10	chr19:51515999-51523431	siKLF5	siNT	8.16078	113.345	3.79588	22.2899	5e-05	0.000141705	yes
KRT6B	KRT6B	KRT6B	chr12:52840434-52845910	siKLF5	siNT	4.73251	63.6111	3.7486	20.2587	5e-05	0.000141705	yes
ANO1	ANO1	ANO1	chr11:69924407-70035652	siKLF5	siNT	4.15136	54.4784	3.71403	20.9532	5e-05	0.000141705	yes
LCK	LCK	LCK	chr1:32716839-32751766	siKLF5	siNT	0.263706	3.29734	3.6443	7.59979	5e-05	0.000141705	yes
TNNC1	TNNC1	TNNC1	chr3:52485106-52488057	siKLF5	siNT	0.886685	8.83072	3.31604	6.5295	5e-05	0.000141705	yes
SMPD3	SMPD3	SMPD3	chr16:68392229-68482409	siKLF5	siNT	0.274878	2.62766	3.25691	10.728	5e-05	0.000141705	yes
MYO1A	MYO1A	MYO1A	chr12:57422300-57444549	siKLF5	siNT	1.40056	13.3355	3.2512	16.1215	5e-05	0.000141705	yes
KRT4	KRT4	KRT4	chr12:53200326-53207900	siKLF5	siNT	0.124246	1.12013	3.17239	4.87194	5e-05	0.000141705	yes
PHGR1	PHGR1	PHGR1	chr15:40643233-40648634	siKLF5	siNT	70.7533	523.945	2.88855	16.4198	5e-05	0.000141705	yes
CLIC5	CLIC5	CLIC5	chr6:45866189-46048085	siKLF5	siNT	0.238747	1.68127	2.816	5.80586	5e-05	0.000141705	yes
SCEL	SCEL	SCEL	chr13:78109808-78219398	siKLF5	siNT	2.8257	19.5252	2.78866	14.6391	5e-05	0.000141705	yes
PRKCDBP	PRKCDBP	PRKCDBP	chr11:6340175-6341740	siKLF5	siNT	1.37942	9.37694	2.76506	8.31945	5e-05	0.000141705	yes
RBP1	RBP1	RBP1	chr3:139236275-139258671	siKLF5	siNT	0.163663	1.09843	2.74665	2.1908	0.00155	0.00345216	yes
CDH17	CDH17	CDH17	chr8:95139393-95229531	siKLF5	siNT	16.714	109.792	2.71565	16.6455	5e-05	0.000141705	yes
KRT13	KRT13	KRT13	chr17:39657232-39661865	siKLF5	siNT	0.427847	2.75013	2.68433	6.21233	5e-05	0.000141705	yes
EMP1	EMP1	EMP1	chr12:13349601-13369708	siKLF5	siNT	5.15595	32.7275	2.66619	14.8314	5e-05	0.000141705	yes
SLC9A3	SLC9A3	SLC9A3	chr5:473333-524549	siKLF5	siNT	1.44566	9.06422	2.64845	12.0871	5e-05	0.000141705	yes
UCA1	UCA1	UCA1	chr19:15939756-15947131	siKLF5	siNT	0.788994	4.93122	2.64386	9.16664	5e-05	0.000141705	yes
MMP28	MMP28	MMP28	chr17:34092875-34122640	siKLF5	siNT	4.39911	27.1055	2.6233	10.4885	5e-05	0.000141705	yes
FGF19	FGF19	FGF19	chr11:69513005-69519106	siKLF5	siNT	1.84185	11.2938	2.61631	11.8063	5e-05	0.000141705	yes
RABL2B	RABL2B	RABL2B	chr22:51195513-51238065	siKLF5	siNT	0.634866	3.86359	2.60542	6.52099	5e-05	0.000141705	yes
TRIM29	TRIM29	TRIM29	chr11:119981993-120008863	siKLF5	siNT	1.81449	10.9524	2.5936	12.6678	5e-05	0.000141705	yes
KRT16	KRT16	KRT16	chr17:39766030-39769079	siKLF5	siNT	6.90347	41.3378	2.58207	13.9289	5e-05	0.000141705	yes
RAPGEFL1	RAPGEFL1	RAPGEFL1	chr17:38334241-38351906	siKLF5	siNT	2.0087	11.9059	2.56734	12.9995	5e-05	0.000141705	yes
KLF5	KLF5	KLF5	chr13:73633141-73651676	siKLF5	siNT	30.0061	177.508	2.56456	15.8271	5e-05	0.000141705	yes
SLC6A20	SLC6A20	SLC6A20	chr3:45796940-45838035	siKLF5	siNT	0.293922	1.62401	2.46606	8.19476	5e-05	0.000141705	yes
LPAR5	LPAR5	LPAR5	chr12:6728000-6745297	siKLF5	siNT	0.95224	5.25096	2.46319	9.71178	5e-05	0.000141705	yes
UNC5B	UNC5B	UNC5B	chr10:72972291-73062635	siKLF5	siNT	0.893288	4.73223	2.40532	11.9331	5e-05	0.000141705	yes
CDA	CDA	CDA	chr1:20915443-20945400	siKLF5	siNT	0.833079	4.40941	2.40406	5.49971	5e-05	0.000141705	yes
GLI2	GLI2	GLI2	chr2:121554866-121750229	siKLF5	siNT	0.295206	1.48353	2.32924	8.47408	5e-05	0.000141705	yes
FAIM2	FAIM2	FAIM2	chr12:50260678-50297760	siKLF5	siNT	0.807979	3.90087	2.27141	10.2043	5e-05	0.000141705	yes
NTSR1	NTSR1	NTSR1	chr20:61340188-61394123	siKLF5	siNT	1.31253	6.23351	2.2477	10.913	5e-05	0.000141705	yes
DPCR1	DPCR1	DPCR1	chr6_qbl_hap6:2201749-2214969	siKLF5	siNT	0.350146	1.62359	2.21316	7.69909	5e-05	0.000141705	yes
FGFBP1	FGFBP1	FGFBP1	chr4:15937192-15940363	siKLF5	siNT	0.294073	1.35822	2.20747	3.73227	5e-05	0.000141705	yes
FAM83A	FAM83A	FAM83A	chr8:124194751-124222318	siKLF5	siNT	0.686456	3.17031	2.20739	7.33439	5e-05	0.000141705	yes
GPR161	GPR161	GPR161	chr1:168048779-168106905	siKLF5	siNT	1.93847	8.71783	2.16905	12.1435	5e-05	0.000141705	yes
PITX1	PITX1	PITX1	chr5:134363423-134369964	siKLF5	siNT	2.46492	11.0017	2.15811	10.5553	5e-05	0.000141705	yes
PTRF	PTRF	PTRF	chr17:40554466-40575338	siKLF5	siNT	2.74976	12.2176	2.15158	11.3438	5e-05	0.000141705	yes
SULT2B1	SULT2B1	SULT2B1	chr19:49055428-49102684	siKLF5	siNT	17.7682	77.9686	2.1336	12.18	5e-05	0.000141705	yes
LINC00483	LINC00483	LINC00483	chr17:48838394-48844876	siKLF5	siNT	0.338154	1.44744	2.09775	2.69893	0.0004	0.000994575	yes
PPP1R1B	PPP1R1B	PPP1R1B	chr17:37783176-37792878	siKLF5	siNT	0.248793	1.05012	2.07754	2.85215	5e-05	0.000141705	yes
GUCA2A	GUCA2A	GUCA2A	chr1:42628361-42630395	siKLF5	siNT	3.09457	13.0196	2.07287	6.20314	5e-05	0.000141705	yes
DOCK11	DOCK11	DOCK11	chrX:117629871-117820123	siKLF5	siNT	0.811196	3.39949	2.06719	10.1839	5e-05	0.000141705	yes
C19orf21	C19orf21	C19orf21	chr19:751145-764318	siKLF5	siNT	13.434	55.8825	2.05651	12.3589	5e-05	0.000141705	yes
IL1RN	IL1RN	IL1RN	chr2:113875469-113891593	siKLF5	siNT	2.37523	9.85874	2.05333	9.01394	5e-05	0.000141705	yes
ABP1	ABP1	ABP1	chr7:150549564-150558379	siKLF5	siNT	0.512094	2.12381	2.05217	5.88281	5e-05	0.000141705	yes
ALOX5	ALOX5	ALOX5	chr10:45869623-45941567	siKLF5	siNT	0.920768	3.7937	2.0427	7.50974	5e-05	0.000141705	yes
SULT1B1	SULT1B1	SULT1B1	chr4:70592685-70626430	siKLF5	siNT	1.98856	8.16737	2.03815	7.68162	5e-05	0.000141705	yes
PI3	PI3	PI3	chr20:43803539-43805185	siKLF5	siNT	3.60913	14.7079	2.02687	6.19955	5e-05	0.000141705	yes
FSTL3	FSTL3	FSTL3	chr19:676388-683392	siKLF5	siNT	5.40577	21.7747	2.01008	11.0016	5e-05	0.000141705	yes
CREB3L1	CREB3L1	CREB3L1	chr11:46299227-46342972	siKLF5	siNT	24.7084	99.4652	2.00919	12.3408	5e-05	0.000141705	yes
AIM1L	AIM1L	AIM1L	chr1:26648349-26680621	siKLF5	siNT	1.00744	4.02177	1.99714	9.55623	5e-05	0.000141705	yes
GJB3	GJB3	GJB3	chr1:35246789-35251967	siKLF5	siNT	6.07688	24.2477	1.99644	10.5751	5e-05	0.000141705	yes
TNK2	TNK2	TNK2	chr3:195590235-195635880	siKLF5	siNT	3.66498	14.4592	1.98012	11.1249	5e-05	0.000141705	yes
DNMT3B	DNMT3B	DNMT3B	chr20:31350190-31397162	siKLF5	siNT	1.57061	6.1455	1.9682	9.59681	5e-05	0.000141705	yes
COL9A3	COL9A3	COL9A3	chr20:61448413-61493115	siKLF5	siNT	5.45871	21.2347	1.95979	7.93257	5e-05	0.000141705	yes
MAPK14	MAPK14	MAPK14	chr6:35995453-36079013	siKLF5	siNT	3.03834	11.4279	1.91121	10.4414	5e-05	0.000141705	yes
MSLN	MSLN	MSLN	chr16:810764-818865	siKLF5	siNT	5.67842	20.9345	1.88232	10.1253	5e-05	0.000141705	yes
SDCBP2	SDCBP2	SDCBP2	chr20:1290554-1373816	siKLF5	siNT	9.08266	33.4115	1.87916	3.10126	5e-05	0.000141705	yes
PRODH	PRODH	PRODH	chr22:18900286-18924066	siKLF5	siNT	58.9181	215.927	1.87376	11.5692	5e-05	0.000141705	yes
SPNS2	SPNS2	SPNS2	chr17:4402128-4458681	siKLF5	siNT	4.37405	15.8835	1.86049	7.13591	5e-05	0.000141705	yes
CDH11	CDH11	CDH11	chr16:64980682-65155919	siKLF5	siNT	1.87644	6.8107	1.85981	9.09042	5e-05	0.000141705	yes
HSD11B2	HSD11B2	HSD11B2	chr16:67465035-67471454	siKLF5	siNT	5.51645	19.8694	1.84874	9.60688	5e-05	0.000141705	yes
VSTM2L	VSTM2L	VSTM2L	chr20:36531498-36573747	siKLF5	siNT	0.690785	2.45842	1.83142	5.52842	5e-05	0.000141705	yes
FSCN1	FSCN1	FSCN1	chr7:5632435-5646287	siKLF5	siNT	3.20852	11.3703	1.82529	9.34618	5e-05	0.000141705	yes
TLN2	TLN2	TLN2	chr15:62939509-63136829	siKLF5	siNT	2.02378	7.12564	1.81597	10.5631	5e-05	0.000141705	yes
KLK1	KLK1	KLK1	chr19:51322403-51327043	siKLF5	siNT	0.916472	3.21668	1.81141	4.01011	5e-05	0.000141705	yes
PLEKHD1	PLEKHD1	PLEKHD1	chr14:69951470-69995215	siKLF5	siNT	0.382504	1.32764	1.79531	3.97968	5e-05	0.000141705	yes
HTR1D	HTR1D	HTR1D	chr1:23518387-23521222	siKLF5	siNT	1.4563	5.03285	1.78907	8.01251	5e-05	0.000141705	yes
CDR2L	CDR2L	CDR2L	chr17:72983726-73001892	siKLF5	siNT	8.64589	29.6992	1.78034	10.5346	5e-05	0.000141705	yes
MGLL	MGLL	MGLL	chr3:127407904-127542093	siKLF5	siNT	4.73353	16.2151	1.77635	10.2076	5e-05	0.000141705	yes
ZNF185	ZNF185	ZNF185	chrX:152082985-152142025	siKLF5	siNT	5.15619	17.6133	1.77228	9.98521	5e-05	0.000141705	yes
MAFB	MAFB	MAFB	chr20:39314516-39317876	siKLF5	siNT	1.11012	3.76367	1.76142	7.66268	5e-05	0.000141705	yes
C15orf52	C15orf52	C15orf52	chr15:40623652-40633168	siKLF5	siNT	1.7862	6.05323	1.76081	9.16829	5e-05	0.000141705	yes
INHBB	INHBB	INHBB	chr2:121103718-121109383	siKLF5	siNT	2.69047	9.05532	1.75091	8.90603	5e-05	0.000141705	yes
COL17A1	COL17A1	COL17A1	chr10:105791045-105845638	siKLF5	siNT	0.85184	2.865	1.74988	8.25821	5e-05	0.000141705	yes
ACE	ACE	ACE	chr17:61554421-61575741	siKLF5	siNT	2.31642	7.75756	1.7437	9.31479	5e-05	0.000141705	yes
MTMR11	MTMR11	MTMR11	chr1:149900542-149908791	siKLF5	siNT	3.01395	10.0079	1.73141	8.71195	5e-05	0.000141705	yes
ARAP3	ARAP3	ARAP3	chr5:141032967-141061800	siKLF5	siNT	0.78646	2.60058	1.72539	7.81155	5e-05	0.000141705	yes
RABL2A	RABL2A	RABL2A	chr2:114384816-114400975	siKLF5	siNT	0.31495	1.03829	1.72102	3.08978	5e-05	0.000141705	yes
TFF1	TFF1	TFF1	chr21:43782390-43786644	siKLF5	siNT	927.845	3057.07	1.72019	10.6119	5e-05	0.000141705	yes
HKDC1	HKDC1	HKDC1	chr10:70980058-71027315	siKLF5	siNT	4.13988	13.5892	1.7148	9.50403	5e-05	0.000141705	yes
KIAA1199	KIAA1199	KIAA1199	chr15:81071711-81243999	siKLF5	siNT	12.7127	41.6747	1.7129	10.5992	5e-05	0.000141705	yes
C10orf54	C10orf54	C10orf54	chr10:73156690-73575704	siKLF5	siNT	1.95145	6.38525	1.7102	8.78046	5e-05	0.000141705	yes
ERN2	ERN2	ERN2	chr16:23690200-23724821	siKLF5	siNT	8.85683	28.9719	1.70979	5.24214	5e-05	0.000141705	yes
ENTPD8	ENTPD8	ENTPD8	chr9:140317846-140335901	siKLF5	siNT	0.313182	1.02308	1.70785	2.31907	0.00275	0.00580682	yes
MARCH3	MARCH3	MARCH3	chr5:126203405-126366440	siKLF5	siNT	0.443705	1.4446	1.703	5.75786	5e-05	0.000141705	yes
PRRX2	PRRX2	PRRX2	chr9:132427919-132484951	siKLF5	siNT	1.14052	3.7074	1.70071	5.14367	5e-05	0.000141705	yes
ARC	ARC	ARC	chr8:143692404-143695833	siKLF5	siNT	0.418107	1.35759	1.6991	4.96177	5e-05	0.000141705	yes
SEMA3B	SEMA3B	SEMA3B	chr3:50305039-50314572	siKLF5	siNT	5.94866	19.3073	1.69851	9.54068	5e-05	0.000141705	yes
TARS	TARS	TARS	chr5:33440801-33468196	siKLF5	siNT	27.9609	90.5439	1.69521	10.472	5e-05	0.000141705	yes
NOTUM	NOTUM	NOTUM	chr17:79910382-79919057	siKLF5	siNT	17.727	57.1378	1.6885	10.1086	5e-05	0.000141705	yes
C20orf118	C20orf118	C20orf118	chr20:35504569-35580246	siKLF5	siNT	0.953265	3.04196	1.67405	2.91985	5e-05	0.000141705	yes
SHF	SHF	SHF	chr15:45459411-45493373	siKLF5	siNT	0.866232	2.74455	1.66374	5.9352	5e-05	0.000141705	yes
HAP1	HAP1	HAP1	chr17:39878890-39890898	siKLF5	siNT	0.712209	2.24813	1.65835	6.45567	5e-05	0.000141705	yes
CEACAM5	CEACAM5	CEACAM5	chr19:42212529-42234437	siKLF5	siNT	7.65008	24.1009	1.65554	9.71618	5e-05	0.000141705	yes
SOX8	SOX8	SOX8	chr16:1031807-1036979	siKLF5	siNT	0.727269	2.28531	1.65183	5.95888	5e-05	0.000141705	yes
JDP2	JDP2	JDP2	chr14:75894508-75939404	siKLF5	siNT	1.19973	3.76774	1.65099	7.53935	5e-05	0.000141705	yes
ADIRF	ADIRF	ADIRF	chr10:88728187-88769960	siKLF5	siNT	2.8326	8.88588	1.64939	5.07495	5e-05	0.000141705	yes
ZNF503	ZNF503	ZNF503	chr10:77157602-77168740	siKLF5	siNT	3.7767	11.7809	1.64126	8.4089	5e-05	0.000141705	yes
DOK7	DOK7	DOK7	chr4:3465032-3496209	siKLF5	siNT	0.502664	1.56173	1.63548	4.52679	5e-05	0.000141705	yes
PLEKHA4	PLEKHA4	PLEKHA4	chr19:49340353-49371884	siKLF5	siNT	1.01623	3.15648	1.63508	6.56739	5e-05	0.000141705	yes
TMPRSS4	TMPRSS4	TMPRSS4	chr11:117886486-117990556	siKLF5	siNT	23.9799	74.4373	1.6342	10.0789	5e-05	0.000141705	yes
CEACAM6	CEACAM6	CEACAM6	chr19:42259397-42276113	siKLF5	siNT	284.418	881.062	1.63123	9.73876	5e-05	0.000141705	yes
SEMA5A	SEMA5A	SEMA5A	chr5:9035137-9546233	siKLF5	siNT	2.59307	8.03248	1.63119	9.67938	5e-05	0.000141705	yes
EFNB2	EFNB2	EFNB2	chr13:107142078-107187388	siKLF5	siNT	21.0629	65.1424	1.62889	10.0922	5e-05	0.000141705	yes
BHLHE41	BHLHE41	BHLHE41	chr12:26272958-26278003	siKLF5	siNT	0.840276	2.57556	1.61595	6.63686	5e-05	0.000141705	yes
IRX4	IRX4	IRX4	chr5:1877540-1882880	siKLF5	siNT	1.35362	4.14508	1.61458	6.41528	5e-05	0.000141705	yes
CORO1A	CORO1A	CORO1A	chr16:30194730-30200575	siKLF5	siNT	1.17431	3.5598	1.59998	5.55724	5e-05	0.000141705	yes
UPK1A	UPK1A	UPK1A	chr19:36157714-36169367	siKLF5	siNT	0.428718	1.28814	1.58719	2.86661	5e-05	0.000141705	yes
SPON2	SPON2	SPON2	chr4:1160720-1202750	siKLF5	siNT	1.15757	3.42129	1.56344	5.15935	5e-05	0.000141705	yes
RASD1	RASD1	RASD1	chr17:17397752-17399709	siKLF5	siNT	0.376738	1.1126	1.5623	3.23076	5e-05	0.000141705	yes
GPRC5A	GPRC5A	GPRC5A	chr12:13043955-13066600	siKLF5	siNT	36.3442	107.265	1.56138	9.67842	5e-05	0.000141705	yes
ASPHD2	ASPHD2	ASPHD2	chr22:26825279-26840978	siKLF5	siNT	1.83576	5.38105	1.55151	7.42621	5e-05	0.000141705	yes
ALS2CL	ALS2CL	ALS2CL	chr3:46710484-46735194	siKLF5	siNT	0.751868	2.20104	1.54963	6.63879	5e-05	0.000141705	yes
GRHL3	GRHL3	GRHL3	chr1:24645811-24741587	siKLF5	siNT	3.45131	10.0158	1.53707	6.24949	5e-05	0.000141705	yes
TUBB6	TUBB6	TUBB6	chr18:12308256-12326568	siKLF5	siNT	0.612591	1.77705	1.53649	4.10615	5e-05	0.000141705	yes
P2RY2	P2RY2	P2RY2	chr11:72929343-72947395	siKLF5	siNT	1.71806	4.97183	1.533	6.7986	5e-05	0.000141705	yes
SCN1B	SCN1B	SCN1B	chr19:35521591-35531353	siKLF5	siNT	0.921737	2.661	1.52954	4.27484	5e-05	0.000141705	yes
GDPD3	GDPD3	GDPD3	chr16:30116130-30124878	siKLF5	siNT	8.81163	25.1566	1.51346	7.61654	5e-05	0.000141705	yes
RAP1GAP2	RAP1GAP2	RAP1GAP2	chr17:2699731-2941035	siKLF5	siNT	0.867606	2.47574	1.51275	7.29332	5e-05	0.000141705	yes
PTGER2	PTGER2	PTGER2	chr14:52781015-52795322	siKLF5	siNT	0.653895	1.86498	1.51202	4.8733	5e-05	0.000141705	yes
PSCA	PSCA	PSCA	chr8:143751725-143764145	siKLF5	siNT	5.45392	15.5453	1.51111	7.02892	5e-05	0.000141705	yes
LOC283174	LOC283174	LOC283174	chr11:133766329-133771635	siKLF5	siNT	3.08244	8.7782	1.50985	8.43751	5e-05	0.000141705	yes
EFNB1	EFNB1	EFNB1	chrX:68048839-68062006	siKLF5	siNT	21.0596	59.8169	1.50608	9.26284	5e-05	0.000141705	yes
CRISPLD2	CRISPLD2	CRISPLD2	chr16:84853586-84943116	siKLF5	siNT	1.60437	4.53541	1.49923	7.37094	5e-05	0.000141705	yes
PODXL	PODXL	PODXL	chr7:131185020-131241376	siKLF5	siNT	2.7163	7.65021	1.49386	8.3134	5e-05	0.000141705	yes
IGSF9B	IGSF9B	IGSF9B	chr11:133785184-133826880	siKLF5	siNT	2.12195	5.97026	1.4924	8.28265	5e-05	0.000141705	yes
ABLIM3	ABLIM3	ABLIM3	chr5:148521053-148639999	siKLF5	siNT	0.774345	2.16728	1.48483	6.18746	5e-05	0.000141705	yes
EPB41L4B	EPB41L4B	EPB41L4B	chr9:111934253-112083021	siKLF5	siNT	10.1476	28.3762	1.48354	8.89367	5e-05	0.000141705	yes
SLC16A1	SLC16A1	SLC16A1	chr1:113454469-113498975	siKLF5	siNT	3.87924	10.8215	1.48005	8.16241	5e-05	0.000141705	yes
NES	NES	NES	chr1:156638555-156647189	siKLF5	siNT	1.84003	5.12052	1.47656	7.71215	5e-05	0.000141705	yes
CAPN9	CAPN9	CAPN9	chr1:230883129-230937749	siKLF5	siNT	1.08614	3.01798	1.47438	5.54251	5e-05	0.000141705	yes
KLK11	KLK11	KLK11	chr19:51525486-51531290	siKLF5	siNT	1.45089	4.02735	1.47289	4.48398	5e-05	0.000141705	yes
ETS1	ETS1	ETS1	chr11:128328655-128457453	siKLF5	siNT	1.71906	4.74103	1.46358	7.46273	5e-05	0.000141705	yes
B3GNT7	B3GNT7	B3GNT7	chr2:232260334-232265875	siKLF5	siNT	3.05654	8.41321	1.46076	7.70502	5e-05	0.000141705	yes
MYH14	MYH14	MYH14	chr19:50706884-50813801	siKLF5	siNT	25.9695	71.397	1.45905	9.07532	5e-05	0.000141705	yes
LEF1	LEF1	LEF1	chr4:108968700-109097586	siKLF5	siNT	1.88928	5.17815	1.4546	6.82091	5e-05	0.000141705	yes
EPB41L1	EPB41L1	EPB41L1	chr20:34679425-34820721	siKLF5	siNT	19.269	52.6956	1.4514	8.99958	5e-05	0.000141705	yes
BHLHE40	BHLHE40	BHLHE40	chr3:5021096-5026865	siKLF5	siNT	7.21986	19.6358	1.44345	8.27955	5e-05	0.000141705	yes
IL22RA1	IL22RA1	IL22RA1	chr1:24446260-24469775	siKLF5	siNT	2.73545	7.43574	1.4427	7.16979	5e-05	0.000141705	yes
GSDMB	GSDMB	GSDMB	chr17:38060847-38074903	siKLF5	siNT	2.01249	5.46666	1.44168	5.69327	5e-05	0.000141705	yes
KIF21B	KIF21B	KIF21B	chr1:200938513-200992828	siKLF5	siNT	1.26112	3.42492	1.44136	7.66724	5e-05	0.000141705	yes
ATAD3B	ATAD3B	ATAD3B	chr1:1407163-1431582	siKLF5	siNT	1.81357	4.9223	1.4405	6.4458	5e-05	0.000141705	yes
KRT23	KRT23	KRT23	chr17:39078951-39093836	siKLF5	siNT	0.713967	1.93004	1.4347	4.42527	5e-05	0.000141705	yes
CDX2	CDX2	CDX2	chr13:28536204-28543505	siKLF5	siNT	0.761522	2.04539	1.42542	4.71957	5e-05	0.000141705	yes
DNAJA4	DNAJA4	DNAJA4	chr15:78556486-78574538	siKLF5	siNT	1.00517	2.69179	1.42113	5.67307	5e-05	0.000141705	yes
CYP4F3	CYP4F3	CYP4F3	chr19:15751706-15771570	siKLF5	siNT	12.0165	32.1571	1.42012	8.47409	5e-05	0.000141705	yes
NKD2	NKD2	NKD2	chr5:1009076-1038927	siKLF5	siNT	5.55184	14.8138	1.4159	7.3097	5e-05	0.000141705	yes
VSNL1	VSNL1	VSNL1	chr2:17721806-17837706	siKLF5	siNT	0.628301	1.67467	1.41435	3.99472	5e-05	0.000141705	yes
MTSS1	MTSS1	MTSS1	chr8:125563027-125740730	siKLF5	siNT	5.82691	15.5088	1.41228	8.31304	5e-05	0.000141705	yes
HR	HR	HR	chr8:21971931-21988565	siKLF5	siNT	9.58103	25.4904	1.4117	8.5752	5e-05	0.000141705	yes
PTPRU	PTPRU	PTPRU	chr1:29563027-29653325	siKLF5	siNT	4.57894	12.1746	1.41079	8.23644	5e-05	0.000141705	yes
FOLR1	FOLR1	FOLR1	chr11:71900601-71907367	siKLF5	siNT	0.50184	1.33382	1.41027	2.16491	0.00035	0.000877178	yes
KRTAP3-2	KRTAP3-2	KRTAP3-2	chr17:39155444-39156138	siKLF5	siNT	0.528453	1.40154	1.40717	1.95199	0.0042	0.00851157	yes
C2orf54	C2orf54	C2orf54	chr2:241825464-241835573	siKLF5	siNT	1.607	4.2573	1.40557	5.83999	5e-05	0.000141705	yes
OAF	OAF	OAF	chr11:120081746-120100650	siKLF5	siNT	2.77225	7.34368	1.40545	6.53139	5e-05	0.000141705	yes
DAB2	DAB2	DAB2	chr5:39371775-39425335	siKLF5	siNT	0.688705	1.8196	1.40166	5.6734	5e-05	0.000141705	yes
C3orf70	C3orf70	C3orf70	chr3:184795837-184870802	siKLF5	siNT	0.800445	2.10683	1.3962	6.47628	5e-05	0.000141705	yes
PLCD3	PLCD3	PLCD3	chr17:43189007-43209891	siKLF5	siNT	56.5372	147.872	1.38708	8.6245	5e-05	0.000141705	yes
TTYH1	TTYH1	TTYH1	chr19:54926604-54947899	siKLF5	siNT	2.34026	6.11231	1.38505	6.08355	5e-05	0.000141705	yes
KIAA1467	KIAA1467	KIAA1467	chr12:13197314-13236383	siKLF5	siNT	0.706531	1.8393	1.38033	5.71395	5e-05	0.000141705	yes
FERMT1	FERMT1	FERMT1	chr20:6055491-6104191	siKLF5	siNT	14.7387	38.3544	1.37978	8.51093	5e-05	0.000141705	yes
CADPS	CADPS	CADPS	chr3:62384020-62861064	siKLF5	siNT	2.56606	6.67579	1.37938	7.50099	5e-05	0.000141705	yes
TGM2	TGM2	TGM2	chr20:36756863-36793700	siKLF5	siNT	1.34659	3.49488	1.37593	5.16304	5e-05	0.000141705	yes
MUC1	MUC1	MUC1	chr1:155158299-155162706	siKLF5	siNT	183.711	471.886	1.361	8.32203	5e-05	0.000141705	yes
HERPUD2	HERPUD2	HERPUD2	chr7:35672269-35734772	siKLF5	siNT	2.92761	7.47343	1.35205	6.77263	5e-05	0.000141705	yes
RNF24	RNF24	RNF24	chr20:3912068-3996216	siKLF5	siNT	3.40546	8.68857	1.35127	7.03404	5e-05	0.000141705	yes
MYO15B	MYO15B	MYO15B	chr17:73584138-73663269	siKLF5	siNT	1.14123	2.91003	1.35045	4.97249	5e-05	0.000141705	yes
RNF39	RNF39	RNF39	chr6_ssto_hap7:1365371-1374068	siKLF5	siNT	2.16059	5.50066	1.34818	2.72992	5e-05	0.000141705	yes
RAB37	RAB37	RAB37	chr17:72667255-72743474	siKLF5	siNT	4.85145	12.2266	1.33354	7.02612	5e-05	0.000141705	yes
GPD1	GPD1	GPD1	chr12:50497601-50505103	siKLF5	siNT	0.441079	1.10772	1.32849	3.7979	5e-05	0.000141705	yes
GRAMD1B	GRAMD1B	GRAMD1B	chr11:123396527-123493518	siKLF5	siNT	4.31718	10.8247	1.32616	7.02612	5e-05	0.000141705	yes
MVP	MVP	MVP	chr16:29827527-29859360	siKLF5	siNT	23.8964	59.7396	1.32189	6.97419	5e-05	0.000141705	yes
HRASLS2	HRASLS2	HRASLS2	chr11:63014620-63330855	siKLF5	siNT	1.35577	3.38662	1.32074	1.66718	0.01935	0.0338425	yes
PDLIM7	PDLIM7	PDLIM7	chr5:176910394-176924602	siKLF5	siNT	15.0342	37.4526	1.31681	7.26021	5e-05	0.000141705	yes
MSX2	MSX2	MSX2	chr5:174151574-174157902	siKLF5	siNT	9.08355	22.6212	1.31635	7.44542	5e-05	0.000141705	yes
ALDH3A1	ALDH3A1	ALDH3A1	chr17:19641297-19651746	siKLF5	siNT	1847.81	4582.02	1.31017	6.93861	5e-05	0.000141705	yes
SLC6A9	SLC6A9	SLC6A9	chr1:44457279-44497164	siKLF5	siNT	2.07644	5.14192	1.30819	5.19096	5e-05	0.000141705	yes
WNT7B	WNT7B	WNT7B	chr22:46316247-46373008	siKLF5	siNT	2.63855	6.51824	1.30474	6.77655	5e-05	0.000141705	yes
ABLIM1	ABLIM1	ABLIM1	chr10:116190868-116444414	siKLF5	siNT	25.1613	62.1447	1.30443	8.12094	5e-05	0.000141705	yes
OSBPL7	OSBPL7	OSBPL7	chr17:45884732-45899147	siKLF5	siNT	3.90798	9.63284	1.30154	7.07757	5e-05	0.000141705	yes
RNF223	RNF223	RNF223	chr1:1007125-1009687	siKLF5	siNT	1.51511	3.73439	1.30145	3.96971	5e-05	0.000141705	yes
KLF13	KLF13	KLF13	chr15:31619082-31670102	siKLF5	siNT	12.7483	31.3953	1.30024	8.04301	5e-05	0.000141705	yes
EFNA3	EFNA3	EFNA3	chr1:155051347-155060014	siKLF5	siNT	11.0799	27.2861	1.30022	7.30795	5e-05	0.000141705	yes
KRT19	KRT19	KRT19	chr17:39679868-39684641	siKLF5	siNT	564.884	1390.14	1.29921	7.79783	5e-05	0.000141705	yes
IHH	IHH	IHH	chr2:219919141-219925238	siKLF5	siNT	4.52866	11.1181	1.29575	6.55214	5e-05	0.000141705	yes
GPA33	GPA33	GPA33	chr1:167022081-167059868	siKLF5	siNT	0.996518	2.44464	1.29465	4.93508	5e-05	0.000141705	yes
BCL3	BCL3	BCL3	chr19:45251977-45263301	siKLF5	siNT	8.03187	19.6481	1.29058	7.01192	5e-05	0.000141705	yes
UNC13D	UNC13D	UNC13D	chr17:73823307-73840798	siKLF5	siNT	15.5574	38.0301	1.28954	7.91587	5e-05	0.000141705	yes
FAM46B	FAM46B	FAM46B	chr1:27331510-27339333	siKLF5	siNT	1.17768	2.87566	1.28795	4.91646	5e-05	0.000141705	yes
SLK	SLK	SLK	chr10:105727469-105787342	siKLF5	siNT	11.6959	28.5409	1.28703	7.88675	5e-05	0.000141705	yes
CLRN3	CLRN3	CLRN3	chr10:129676113-129691211	siKLF5	siNT	7.59198	18.4342	1.27983	6.25882	5e-05	0.000141705	yes
TMEM164	TMEM164	TMEM164	chrX:109245862-109421016	siKLF5	siNT	7.72947	18.7408	1.27774	7.63145	5e-05	0.000141705	yes
SEMA6B	SEMA6B	SEMA6B	chr19:4542599-4559771	siKLF5	siNT	0.937718	2.27248	1.27704	5.40927	5e-05	0.000141705	yes
PCSK7	PCSK7	PCSK7	chr11:117075787-117102811	siKLF5	siNT	13.7572	33.2579	1.27351	7.70098	5e-05	0.000141705	yes
PLAC8	PLAC8	PLAC8	chr4:84011210-84035911	siKLF5	siNT	2.93064	7.05437	1.2673	5.34156	5e-05	0.000141705	yes
LINC00857	LINC00857	LINC00857	chr10:81967465-81979413	siKLF5	siNT	0.982958	2.3637	1.26585	4.45282	5e-05	0.000141705	yes
SLC45A3	SLC45A3	SLC45A3	chr1:205626980-205649630	siKLF5	siNT	4.98248	11.9681	1.26426	7.01779	5e-05	0.000141705	yes
KIAA1211	KIAA1211	KIAA1211	chr4:57036360-57196890	siKLF5	siNT	2.11628	5.0804	1.26341	6.93401	5e-05	0.000141705	yes
PMP22	PMP22	PMP22	chr17:15133095-15168644	siKLF5	siNT	1.62375	3.89654	1.26286	4.67885	5e-05	0.000141705	yes
KLK6	KLK6	KLK6	chr19:51461886-51472929	siKLF5	siNT	51.8099	124.322	1.26278	7.78488	5e-05	0.000141705	yes
KRT8	KRT8	KRT8	chr12:53290970-53346685	siKLF5	siNT	1097.57	2631.36	1.26149	5.69256	5e-05	0.000141705	yes
IGFBP6	IGFBP6	IGFBP6	chr12:53491435-53496128	siKLF5	siNT	2.52594	6.03885	1.25745	4.39391	5e-05	0.000141705	yes
TFAP2A	TFAP2A	TFAP2A	chr6:10396915-10419797	siKLF5	siNT	0.752884	1.79239	1.25139	4.45304	5e-05	0.000141705	yes
PTPRN2	PTPRN2	PTPRN2	chr7:157331749-158380482	siKLF5	siNT	3.45321	8.19805	1.24734	6.74272	5e-05	0.000141705	yes
FAM3D	FAM3D	FAM3D	chr3:58619669-58652561	siKLF5	siNT	2.97152	7.04709	1.24583	5.15654	5e-05	0.000141705	yes
EPHA2	EPHA2	EPHA2	chr1:16450831-16482582	siKLF5	siNT	16.9808	40.2392	1.2447	7.63746	5e-05	0.000141705	yes
HTR1B	HTR1B	HTR1B	chr6:78171947-78173120	siKLF5	siNT	0.633265	1.49948	1.24358	2.62767	5e-05	0.000141705	yes
PPL	PPL	PPL	chr16:4932507-4987136	siKLF5	siNT	9.34151	22.0742	1.24063	7.57321	5e-05	0.000141705	yes
NKD1	NKD1	NKD1	chr16:50582240-50674771	siKLF5	siNT	0.922831	2.1732	1.23568	6.14758	5e-05	0.000141705	yes
BPIFB1	BPIFB1	BPIFB1	chr20:31870940-31897684	siKLF5	siNT	1.61251	3.78248	1.23002	4.63964	5e-05	0.000141705	yes
LMNA	LMNA	LMNA	chr1:156052368-156109880	siKLF5	siNT	367.167	860.841	1.22931	7.26857	5e-05	0.000141705	yes
SLC35E4	SLC35E4	SLC35E4	chr22:31031792-31043862	siKLF5	siNT	1.14098	2.67357	1.22849	4.73934	5e-05	0.000141705	yes
C1orf226	C1orf226	C1orf226	chr1:162348695-162356608	siKLF5	siNT	3.13538	7.3441	1.22795	6.21478	5e-05	0.000141705	yes
CAPG	CAPG	CAPG	chr2:85621870-85641197	siKLF5	siNT	41.6949	97.6426	1.22764	7.39893	5e-05	0.000141705	yes
LAT2	LAT2	LAT2	chr7:73624086-73644164	siKLF5	siNT	1.1766	2.74824	1.22388	4.47076	5e-05	0.000141705	yes
BMP7	BMP7	BMP7	chr20:55743808-55841707	siKLF5	siNT	11.0679	25.7144	1.2162	7.32736	5e-05	0.000141705	yes
TRERF1	TRERF1	TRERF1	chr6:42192668-42419783	siKLF5	siNT	2.20252	5.10809	1.21363	6.74006	5e-05	0.000141705	yes
ENO2	ENO2	ENO2	chr12:7023613-7032859	siKLF5	siNT	4.39829	10.1984	1.21332	6.27261	5e-05	0.000141705	yes
MGAT3	MGAT3	MGAT3	chr22:39853324-39888199	siKLF5	siNT	7.6323	17.673	1.21136	7.25092	5e-05	0.000141705	yes
EPS8L1	EPS8L1	EPS8L1	chr19:55587220-55599291	siKLF5	siNT	11.7979	27.3183	1.21134	7.05635	5e-05	0.000141705	yes
GLRX	GLRX	GLRX	chr5:95149552-95158577	siKLF5	siNT	0.499734	1.1563	1.21028	1.9737	0.00135	0.00304202	yes
DNM3	DNM3	DNM3	chr1:171810620-172381857	siKLF5	siNT	0.660472	1.52027	1.20276	5.45684	5e-05	0.000141705	yes
APCDD1	APCDD1	APCDD1	chr18:10454624-10488698	siKLF5	siNT	6.20323	14.2741	1.20231	6.60414	5e-05	0.000141705	yes
TMEM246	TMEM246	TMEM246	chr9:104237607-104249475	siKLF5	siNT	15.5908	35.6443	1.19298	7.02148	5e-05	0.000141705	yes
FLNB	FLNB	FLNB	chr3:57994126-58157982	siKLF5	siNT	25.5898	58.4404	1.19139	7.41976	5e-05	0.000141705	yes
CARD6	CARD6	CARD6	chr5:40841409-40855456	siKLF5	siNT	0.713762	1.62924	1.19068	4.6434	5e-05	0.000141705	yes
MDFI	MDFI	MDFI	chr6:41606194-41621982	siKLF5	siNT	21.4211	48.8638	1.18973	7.00445	5e-05	0.000141705	yes
CHAC1	CHAC1	CHAC1	chr15:41245635-41248717	siKLF5	siNT	9.0655	20.6675	1.18891	6.31178	5e-05	0.000141705	yes
SERPINB5	SERPINB5	SERPINB5	chr18:61144143-61172318	siKLF5	siNT	27.4352	62.5096	1.18805	7.29588	5e-05	0.000141705	yes
GAST	GAST	GAST	chr17:39868577-39872221	siKLF5	siNT	3.58285	8.13336	1.18274	3.02581	5e-05	0.000141705	yes
CCND1	CCND1	CCND1	chr11:69455872-69469242	siKLF5	siNT	83.8043	190.145	1.18201	7.30423	5e-05	0.000141705	yes
NOS1AP	NOS1AP	NOS1AP	chr1:162039580-162339813	siKLF5	siNT	0.777229	1.76269	1.18136	4.86947	5e-05	0.000141705	yes
ZNF114	ZNF114	ZNF114	chr19:48774653-48790863	siKLF5	siNT	3.0842	6.99058	1.18051	5.56532	5e-05	0.000141705	yes
RHOV	RHOV	RHOV	chr15:41164411-41166487	siKLF5	siNT	4.29364	9.72074	1.17887	5.63934	5e-05	0.000141705	yes
ZBTB7C	ZBTB7C	ZBTB7C	chr18:45553638-45663680	siKLF5	siNT	2.21327	5.00269	1.17652	5.96838	5e-05	0.000141705	yes
GAL	GAL	GAL	chr11:68451982-68458643	siKLF5	siNT	1.38073	3.10799	1.17055	2.75728	5e-05	0.000141705	yes
CLTB	CLTB	CLTB	chr5:175819455-175843570	siKLF5	siNT	75.2377	169.139	1.16868	7.18611	5e-05	0.000141705	yes
C12orf36	C12orf36	C12orf36	chr12:13523604-13529679	siKLF5	siNT	1.8606	4.18167	1.16831	5.55248	5e-05	0.000141705	yes
VIPR1	VIPR1	VIPR1	chr3:42530790-42579065	siKLF5	siNT	7.46986	16.7834	1.16788	6.56801	5e-05	0.000141705	yes
FEZF1	FEZF1	FEZF1	chr7:121941447-121950131	siKLF5	siNT	0.594206	1.33341	1.16609	2.74882	5e-05	0.000141705	yes
MICAL2	MICAL2	MICAL2	chr11:12132137-12285331	siKLF5	siNT	7.50272	16.8126	1.16405	6.82143	5e-05	0.000141705	yes
STC2	STC2	STC2	chr5:172741725-172756506	siKLF5	siNT	3.70163	8.29291	1.16372	6.58129	5e-05	0.000141705	yes
PCBP4	PCBP4	PCBP4	chr3:51989329-52001482	siKLF5	siNT	5.52637	12.3589	1.16115	6.02011	5e-05	0.000141705	yes
KRT18	KRT18	KRT18	chr12:53290970-53346685	siKLF5	siNT	631.41	1406.17	1.15512	3.39367	5e-05	0.000141705	yes
KCND3	KCND3	KCND3	chr1:112318453-112531777	siKLF5	siNT	1.13116	2.51301	1.15161	4.47844	5e-05	0.000141705	yes
TCF7	TCF7	TCF7	chr5:133450401-133483920	siKLF5	siNT	4.55329	10.1118	1.15106	6.06111	5e-05	0.000141705	yes
MXD1	MXD1	MXD1	chr2:70142172-70170076	siKLF5	siNT	3.05528	6.78052	1.15009	6.43082	5e-05	0.000141705	yes
WNT10B	WNT10B	WNT10B	chr12:49359122-49365641	siKLF5	siNT	0.537483	1.19	1.14667	3.2019	5e-05	0.000141705	yes
SLC16A3	SLC16A3	SLC16A3	chr17:80186281-80197375	siKLF5	siNT	16.1091	35.6238	1.14496	6.7942	5e-05	0.000141705	yes
KRT15	KRT15	KRT15	chr17:39669996-39675270	siKLF5	siNT	0.672363	1.48682	1.14491	3.12108	5e-05	0.000141705	yes
LOC115110	LOC115110	LOC115110	chr1:2481358-2484284	siKLF5	siNT	0.467898	1.03387	1.14379	2.91011	5e-05	0.000141705	yes
ROCK2	ROCK2	ROCK2	chr2:11321777-11484711	siKLF5	siNT	12.2826	27.1328	1.14343	7.03942	5e-05	0.000141705	yes
NDUFAF3	NDUFAF3	NDUFAF3	chr3:49044636-49060926	siKLF5	siNT	21.2654	46.9189	1.14166	3.3645	5e-05	0.000141705	yes
EPS8L3	EPS8L3	EPS8L3	chr1:110292701-110306644	siKLF5	siNT	13.2635	29.2442	1.14069	6.64976	5e-05	0.000141705	yes
BDKRB2	BDKRB2	BDKRB2	chr14:96671134-96710666	siKLF5	siNT	2.73142	6.00572	1.13669	5.97067	5e-05	0.000141705	yes
IFITM2	IFITM2	IFITM2	chr11:308106-309410	siKLF5	siNT	8.79726	19.3042	1.13379	5.20581	5e-05	0.000141705	yes
C6orf132	C6orf132	C6orf132	chr6:42068856-42110715	siKLF5	siNT	30.3363	66.5481	1.13335	7.06187	5e-05	0.000141705	yes
TMC7	TMC7	TMC7	chr16:18995255-19075262	siKLF5	siNT	2.40624	5.26261	1.129	5.84821	5e-05	0.000141705	yes
SOX13	SOX13	SOX13	chr1:204042245-204096871	siKLF5	siNT	9.32089	20.3736	1.12816	6.73054	5e-05	0.000141705	yes
N4BP3	N4BP3	N4BP3	chr5:177540555-177553107	siKLF5	siNT	1.17795	2.57464	1.1281	5.42045	5e-05	0.000141705	yes
PARP12	PARP12	PARP12	chr7:139723548-139763521	siKLF5	siNT	1.65748	3.61237	1.12395	5.31438	5e-05	0.000141705	yes
GTF2IRD1	GTF2IRD1	GTF2IRD1	chr7:73868119-74016920	siKLF5	siNT	4.81529	10.4892	1.12322	6.16819	5e-05	0.000141705	yes
LGALS4	LGALS4	LGALS4	chr19:39292310-39303740	siKLF5	siNT	410.216	892.434	1.12136	6.89085	5e-05	0.000141705	yes
JHDM1D	JHDM1D	JHDM1D	chr7:139784545-139876741	siKLF5	siNT	2.50671	5.45016	1.1205	6.43702	5e-05	0.000141705	yes
FMN1	FMN1	FMN1	chr15:33057746-33360085	siKLF5	siNT	2.18822	4.75441	1.11951	6.5319	5e-05	0.000141705	yes
KLF9	KLF9	KLF9	chr9:72999512-73029573	siKLF5	siNT	0.765745	1.66067	1.11682	4.81723	5e-05	0.000141705	yes
SEC62	SEC62	SEC62	chr3:169684579-169716161	siKLF5	siNT	10.0432	21.7581	1.11533	6.83596	5e-05	0.000141705	yes
TNS4	TNS4	TNS4	chr17:38632079-38657854	siKLF5	siNT	43.5484	94.3	1.11464	6.94819	5e-05	0.000141705	yes
POLR3K	POLR3K	POLR3K	chr16:96978-103632	siKLF5	siNT	24.5349	53.026	1.11187	6.12034	5e-05	0.000141705	yes
CARD11	CARD11	CARD11	chr7:2945709-3083509	siKLF5	siNT	9.42428	20.3664	1.11173	6.66524	5e-05	0.000141705	yes
TANC1	TANC1	TANC1	chr2:159825145-160089170	siKLF5	siNT	4.63817	10.0051	1.10911	6.56694	5e-05	0.000141705	yes
C9orf152	C9orf152	C9orf152	chr9:112961845-112970413	siKLF5	siNT	26.7034	57.5798	1.10854	6.80456	5e-05	0.000141705	yes
PRSS33	PRSS33	PRSS33	chr16:2833953-2836708	siKLF5	siNT	0.553285	1.19157	1.10676	2.62742	5e-05	0.000141705	yes
CLSPN	CLSPN	CLSPN	chr1:36197712-36235551	siKLF5	siNT	2.80255	6.02257	1.10364	6.36516	5e-05	0.000141705	yes
SLC4A11	SLC4A11	SLC4A11	chr20:3208062-3219887	siKLF5	siNT	4.95054	10.6356	1.10325	6.07065	5e-05	0.000141705	yes
VDR	VDR	VDR	chr12:48235319-48298814	siKLF5	siNT	7.68923	16.4984	1.10141	6.56979	5e-05	0.000141705	yes
SEMA4G	SEMA4G	SEMA4G	chr10:102732285-102747272	siKLF5	siNT	11.0392	23.6571	1.09964	4.45824	5e-05	0.000141705	yes
S100A2	S100A2	S100A2	chr1:153533584-153538306	siKLF5	siNT	3.566	7.63584	1.09848	4.2343	5e-05	0.000141705	yes
PAQR5	PAQR5	PAQR5	chr15:69591293-69699976	siKLF5	siNT	0.580205	1.2403	1.09606	4.32496	5e-05	0.000141705	yes
ABCG1	ABCG1	ABCG1	chr21:43619798-43717354	siKLF5	siNT	6.5366	13.9727	1.096	6.15221	5e-05	0.000141705	yes
FAM83H	FAM83H	FAM83H	chr8:144806102-144815914	siKLF5	siNT	29.3832	62.7609	1.09488	6.81706	5e-05	0.000141705	yes
C15orf38	C15orf38	C15orf38	chr15:90373830-90456222	siKLF5	siNT	3.77433	8.06151	1.09483	2.04501	0.0022	0.00475499	yes
SLC26A9	SLC26A9	SLC26A9	chr1:205882176-205912588	siKLF5	siNT	5.05842	10.7816	1.09181	6.32831	5e-05	0.000141705	yes
CYP4F12	CYP4F12	CYP4F12	chr19:15783827-15807984	siKLF5	siNT	9.01229	19.1889	1.09031	5.93161	5e-05	0.000141705	yes
LGALS9	LGALS9	LGALS9	chr17:25958173-25976586	siKLF5	siNT	10.5406	22.4322	1.08961	6.09473	5e-05	0.000141705	yes
EHD2	EHD2	EHD2	chr19:48216600-48246391	siKLF5	siNT	4.74714	10.1011	1.08938	6.02203	5e-05	0.000141705	yes
KCNC4	KCNC4	KCNC4	chr1:110753335-110776674	siKLF5	siNT	1.04544	2.21985	1.08636	4.74709	5e-05	0.000141705	yes
MFNG	MFNG	MFNG	chr22:37865100-37882478	siKLF5	siNT	1.43802	3.0515	1.08543	4.17938	5e-05	0.000141705	yes
PPP1R18	PPP1R18	PPP1R18	chr6_ssto_hap7:1976469-1979473	siKLF5	siNT	1.29058	2.736	1.08405	4.51957	5e-05	0.000141705	yes
E2F2	E2F2	E2F2	chr1:23832919-23857712	siKLF5	siNT	3.36956	7.13807	1.08298	6.02806	5e-05	0.000141705	yes
SURF6	SURF6	SURF6	chr9:136197551-136203047	siKLF5	siNT	31.1707	65.9841	1.08193	6.63979	5e-05	0.000141705	yes
SYK	SYK	SYK	chr9:93564011-93660842	siKLF5	siNT	11.8941	25.1444	1.07999	6.55287	5e-05	0.000141705	yes
ZFP91	ZFP91	ZFP91	chr11:58346586-58393205	siKLF5	siNT	11.0568	23.3321	1.07738	6.53778	5e-05	0.000141705	yes
DNAJC15	DNAJC15	DNAJC15	chr13:43597361-43683306	siKLF5	siNT	3.95139	8.33717	1.0772	5.56974	5e-05	0.000141705	yes
ST6GALNAC1	ST6GALNAC1	ST6GALNAC1	chr17:74620844-74639894	siKLF5	siNT	12.9485	27.3127	1.07678	6.34693	5e-05	0.000141705	yes
CKMT1A	CKMT1A	CKMT1A	chr15:43985083-43991420	siKLF5	siNT	6.57099	13.8577	1.07651	5.58949	5e-05	0.000141705	yes
EPAS1	EPAS1	EPAS1	chr2:46524540-46613842	siKLF5	siNT	6.54114	13.7905	1.07606	6.37101	5e-05	0.000141705	yes
AXIN2	AXIN2	AXIN2	chr17:63524682-63557740	siKLF5	siNT	19.9091	41.9729	1.07603	6.64348	5e-05	0.000141705	yes
VASP	VASP	VASP	chr19:46010687-46030240	siKLF5	siNT	36.6466	77.0896	1.07286	6.6188	5e-05	0.000141705	yes
CBS	CBS	CBS	chr21:44473300-44496472	siKLF5	siNT	23.631	49.6683	1.07164	6.54673	5e-05	0.000141705	yes
PKM	PKM	PKM	chr15:72491369-72523727	siKLF5	siNT	886.453	1860.61	1.06966	5.97544	5e-05	0.000141705	yes
MAP3K6	MAP3K6	MAP3K6	chr1:27681669-27693337	siKLF5	siNT	3.03904	6.37016	1.06771	5.70401	5e-05	0.000141705	yes
CNNM4	CNNM4	CNNM4	chr2:97426638-97477628	siKLF5	siNT	4.65892	9.75408	1.06601	6.09232	5e-05	0.000141705	yes
ITGB4	ITGB4	ITGB4	chr17:73717515-73753899	siKLF5	siNT	39.1555	81.9395	1.06534	6.63651	5e-05	0.000141705	yes
S100A11	S100A11	S100A11	chr1:152004981-152009511	siKLF5	siNT	1220.93	2547.96	1.06136	6.50956	5e-05	0.000141705	yes
EHBP1L1	EHBP1L1	EHBP1L1	chr11:65343508-65360116	siKLF5	siNT	4.99652	10.3935	1.05668	6.12467	5e-05	0.000141705	yes
SLC22A3	SLC22A3	SLC22A3	chr6:160769404-160873611	siKLF5	siNT	3.33128	6.92936	1.05664	5.47103	5e-05	0.000141705	yes
PITPNM3	PITPNM3	PITPNM3	chr17:6354582-6459877	siKLF5	siNT	1.78516	3.71295	1.05651	5.64491	5e-05	0.000141705	yes
EFNA2	EFNA2	EFNA2	chr19:1286152-1301429	siKLF5	siNT	1.67668	3.47883	1.05299	4.27075	5e-05	0.000141705	yes
LAMA3	LAMA3	LAMA3	chr18:21269561-21535029	siKLF5	siNT	12.2134	25.329	1.05233	6.33072	5e-05	0.000141705	yes
MCM2	MCM2	MCM2	chr3:127317199-127341278	siKLF5	siNT	34.3426	71.1841	1.05156	6.51577	5e-05	0.000141705	yes
NBL1	NBL1	NBL1	chr1:19923470-19984949	siKLF5	siNT	23.7006	49.1057	1.05097	3.99789	5e-05	0.000141705	yes
TMEM92	TMEM92	TMEM92	chr17:48348766-48358846	siKLF5	siNT	3.6814	7.62569	1.05061	5.35253	5e-05	0.000141705	yes
HNF4A	HNF4A	HNF4A	chr20:42984440-43061485	siKLF5	siNT	10.6081	21.9272	1.04756	5.90721	5e-05	0.000141705	yes
SP6	SP6	SP6	chr17:45922279-45933240	siKLF5	siNT	1.09551	2.2626	1.04638	4.5223	5e-05	0.000141705	yes
KCTD15	KCTD15	KCTD15	chr19:34287750-34306666	siKLF5	siNT	6.0072	12.3936	1.04483	5.93854	5e-05	0.000141705	yes
SH3D21	SH3D21	SH3D21	chr1:36771993-36786948	siKLF5	siNT	0.874067	1.80229	1.04402	3.61091	5e-05	0.000141705	yes
CLIC3	CLIC3	CLIC3	chr9:139889059-139891024	siKLF5	siNT	31.2456	64.3973	1.04335	5.86884	5e-05	0.000141705	yes
S100A5	S100A5	S100A5	chr1:153509622-153514241	siKLF5	siNT	2.46187	5.07165	1.0427	2.97451	5e-05	0.000141705	yes
JPH1	JPH1	JPH1	chr8:75146938-75233562	siKLF5	siNT	5.22457	10.7404	1.03967	5.9451	5e-05	0.000141705	yes
C1QTNF1	C1QTNF1	C1QTNF1	chr17:77015290-77045870	siKLF5	siNT	1.11617	2.29244	1.03833	3.88365	5e-05	0.000141705	yes
TGFB1I1	TGFB1I1	TGFB1I1	chr16:31483475-31489281	siKLF5	siNT	0.561375	1.151	1.03586	2.35192	5e-05	0.000141705	yes
CD55	CD55	CD55	chr1:207494816-207534311	siKLF5	siNT	6.39362	13.0958	1.0344	5.77703	5e-05	0.000141705	yes
ONECUT3	ONECUT3	ONECUT3	chr19:1753661-1775444	siKLF5	siNT	1.48826	3.04608	1.03333	3.52777	5e-05	0.000141705	yes
KIAA0040	KIAA0040	KIAA0040	chr1:175126122-175162229	siKLF5	siNT	3.16292	6.46458	1.0313	5.56282	5e-05	0.000141705	yes
FOSB	FOSB	FOSB	chr19:45971252-45978437	siKLF5	siNT	0.525133	1.07289	1.03074	3.47561	5e-05	0.000141705	yes
MLXIPL	MLXIPL	MLXIPL	chr7:73007523-73038870	siKLF5	siNT	2.4345	4.96388	1.02784	4.99317	5e-05	0.000141705	yes
ZNF703	ZNF703	ZNF703	chr8:37553300-37556396	siKLF5	siNT	28.8423	58.5997	1.02271	6.2221	5e-05	0.000141705	yes
ACTN1	ACTN1	ACTN1	chr14:69340839-69446083	siKLF5	siNT	43.5124	88.1867	1.01914	6.3544	5e-05	0.000141705	yes
ACTN4	ACTN4	ACTN4	chr19:39138266-39235114	siKLF5	siNT	206.293	416.812	1.0147	6.08898	5e-05	0.000141705	yes
DQX1	DQX1	DQX1	chr2:74745257-74753408	siKLF5	siNT	1.09127	2.20485	1.01467	3.91563	5e-05	0.000141705	yes
GCC2	GCC2	GCC2	chr2:109065576-109125854	siKLF5	siNT	2.10779	4.25561	1.01364	5.50168	5e-05	0.000141705	yes
SULT1E1	SULT1E1	SULT1E1	chr4:70706929-70725870	siKLF5	siNT	0.943643	1.9039	1.01264	3.10539	5e-05	0.000141705	yes
DLC1	DLC1	DLC1	chr8:12940871-13372429	siKLF5	siNT	0.62964	1.26839	1.0104	4.19817	5e-05	0.000141705	yes
KLC1	KLC1	KLC1	chr14:104095524-104181823	siKLF5	siNT	18.3255	36.9036	1.00991	4.89496	5e-05	0.000141705	yes
FAM98B	FAM98B	FAM98B	chr15:38746327-38777063	siKLF5	siNT	9.74031	19.59	1.00808	5.10813	5e-05	0.000141705	yes
PP7080	PP7080	PP7080	chr5:470624-473080	siKLF5	siNT	5.28096	10.5958	1.00462	4.97309	5e-05	0.000141705	yes
S100A16	S100A16	S100A16	chr1:153579366-153585514	siKLF5	siNT	278.448	558.53	1.00423	6.25183	5e-05	0.000141705	yes
CLDN1	CLDN1	CLDN1	chr3:190023489-190040235	siKLF5	siNT	0.975797	1.95584	1.00313	4.03082	5e-05	0.000141705	yes
PID1	PID1	PID1	chr2:229888688-230136057	siKLF5	siNT	1.28988	2.58252	1.00154	4.01824	5e-05	0.000141705	yes
HPDL	HPDL	HPDL	chr1:45792544-45794346	siKLF5	siNT	6.41978	12.8279	0.998691	5.159	5e-05	0.000141705	yes
NOXO1	NOXO1	NOXO1	chr16:2028917-2031550	siKLF5	siNT	3.27115	6.52984	0.997249	4.51313	5e-05	0.000141705	yes
LINC00641	LINC00641	LINC00641	chr14:21668237-21675059	siKLF5	siNT	0.95078	1.89633	0.996023	3.55819	5e-05	0.000141705	yes
S100A6	S100A6	S100A6	chr1:153507075-153508717	siKLF5	siNT	1763.45	3515.45	0.995308	5.97489	5e-05	0.000141705	yes
UHRF1	UHRF1	UHRF1	chr19:4909509-4962165	siKLF5	siNT	13.78	27.4656	0.995048	6.04563	5e-05	0.000141705	yes
USP7	USP7	USP7	chr16:8985950-9057341	siKLF5	siNT	18.4481	36.766	0.994902	6.16962	5e-05	0.000141705	yes
FAM155A	FAM155A	FAM155A	chr13:107820878-108519460	siKLF5	siNT	2.81435	5.60565	0.994079	5.14419	5e-05	0.000141705	yes
CD82	CD82	CD82	chr11:44587140-44641315	siKLF5	siNT	29.3762	58.4979	0.993738	5.98318	5e-05	0.000141705	yes
SH2B2	SH2B2	SH2B2	chr7:101928404-101962178	siKLF5	siNT	1.15838	2.30659	0.993646	3.43185	5e-05	0.000141705	yes
AUTS2	AUTS2	AUTS2	chr7:69063904-70257885	siKLF5	siNT	4.53305	9.01258	0.991459	5.7772	5e-05	0.000141705	yes
MBD6	MBD6	MBD6	chr12:57916658-57941114	siKLF5	siNT	4.494	8.90771	0.987054	3.33402	5e-05	0.000141705	yes
ZNF385A	ZNF385A	ZNF385A	chr12:54762919-54785083	siKLF5	siNT	4.42213	8.75948	0.986102	5.0002	5e-05	0.000141705	yes
C14orf80	C14orf80	C14orf80	chr14:105956191-105965585	siKLF5	siNT	5.98526	11.8489	0.98527	4.90204	5e-05	0.000141705	yes
KCNN4	KCNN4	KCNN4	chr19:44270684-44285409	siKLF5	siNT	23.6515	46.8177	0.985121	5.96501	5e-05	0.000141705	yes
GDPD5	GDPD5	GDPD5	chr11:75145684-75236599	siKLF5	siNT	1.49187	2.95136	0.984264	4.41499	5e-05	0.000141705	yes
RRP9	RRP9	RRP9	chr3:51967441-51975957	siKLF5	siNT	14.3529	28.3812	0.983595	5.56352	5e-05	0.000141705	yes
C4BPB	C4BPB	C4BPB	chr1:207262211-207273337	siKLF5	siNT	8.96678	17.7208	0.982781	4.65427	5e-05	0.000141705	yes
SH3D19	SH3D19	SH3D19	chr4:152041432-152149182	siKLF5	siNT	11.5782	22.8622	0.981556	5.95999	5e-05	0.000141705	yes
CDKN1C	CDKN1C	CDKN1C	chr11:2904447-2906995	siKLF5	siNT	3.56366	7.02449	0.979033	4.58844	5e-05	0.000141705	yes
FAM110C	FAM110C	FAM110C	chr2:38813-46588	siKLF5	siNT	1.89643	3.73254	0.976872	4.71298	5e-05	0.000141705	yes
MALL	MALL	MALL	chr2:110841446-110874143	siKLF5	siNT	7.85037	15.4332	0.975205	5.58614	5e-05	0.000141705	yes
DMBX1	DMBX1	DMBX1	chr1:46972667-46979886	siKLF5	siNT	0.685835	1.34596	0.9727	3.21424	5e-05	0.000141705	yes
GAN	GAN	GAN	chr16:81348570-81413803	siKLF5	siNT	1.75739	3.44198	0.969806	4.74363	5e-05	0.000141705	yes
HSPA1A	HSPA1A	HSPA1A	chr6_qbl_hap6:3076937-3079366	siKLF5	siNT	16.5967	32.4698	0.968201	5.73836	5e-05	0.000141705	yes
ST3GAL1	ST3GAL1	ST3GAL1	chr8:134467090-134584183	siKLF5	siNT	28.6231	55.9708	0.967495	6.02588	5e-05	0.000141705	yes
MEX3C	MEX3C	MEX3C	chr18:48700919-48724051	siKLF5	siNT	3.25607	6.36302	0.966579	5.17915	5e-05	0.000141705	yes
BCL2L1	BCL2L1	BCL2L1	chr20:30252260-30310656	siKLF5	siNT	44.2498	86.4532	0.966248	6.0068	5e-05	0.000141705	yes
IQGAP3	IQGAP3	IQGAP3	chr1:156495196-156542396	siKLF5	siNT	13.7072	26.7673	0.965539	5.95726	5e-05	0.000141705	yes
UPK3B	UPK3B	UPK3B	chr7:76139744-76157199	siKLF5	siNT	2.10602	4.11158	0.965175	3.6869	5e-05	0.000141705	yes
GRB7	GRB7	GRB7	chr17:37894161-37903538	siKLF5	siNT	458.732	894.538	0.963489	5.74763	5e-05	0.000141705	yes
FOXC1	FOXC1	FOXC1	chr6:1610680-1614129	siKLF5	siNT	4.911	9.5761	0.963422	5.3076	5e-05	0.000141705	yes
HNRNPH3	HNRNPH3	HNRNPH3	chr10:70042416-70102953	siKLF5	siNT	36.0134	70.1858	0.962647	5.76537	5e-05	0.000141705	yes
FXYD1	FXYD1	FXYD1	chr19:35629731-35633954	siKLF5	siNT	1.46723	2.85921	0.962522	1.64584	0.00595	0.0116747	yes
MGAT5B	MGAT5B	MGAT5B	chr17:74864797-74946471	siKLF5	siNT	0.67099	1.30646	0.961303	3.59722	5e-05	0.000141705	yes
AVPI1	AVPI1	AVPI1	chr10:99437180-99447015	siKLF5	siNT	5.6588	11.0114	0.960432	4.56549	5e-05	0.000141705	yes
CEP128	CEP128	CEP128	chr14:80962820-81405884	siKLF5	siNT	1.20221	2.33757	0.959318	4.38358	5e-05	0.000141705	yes
FOSL2	FOSL2	FOSL2	chr2:28615778-28637516	siKLF5	siNT	18.3838	35.69	0.95709	5.87868	5e-05	0.000141705	yes
MYO1E	MYO1E	MYO1E	chr15:59428167-59665071	siKLF5	siNT	3.14115	6.09624	0.956627	5.24239	5e-05	0.000141705	yes
FA2H	FA2H	FA2H	chr16:74746855-74808729	siKLF5	siNT	13.823	26.7263	0.951184	5.59349	5e-05	0.000141705	yes
RUNX2	RUNX2	RUNX2	chr6:44794466-45518819	siKLF5	siNT	1.59524	3.07792	0.948185	3.38465	5e-05	0.000141705	yes
CKMT1B	CKMT1B	CKMT1B	chr15:43663312-43910998	siKLF5	siNT	9.30065	17.938	0.947613	2.1165	0.00035	0.000877178	yes
PPP3CA	PPP3CA	PPP3CA	chr4:101944586-102268628	siKLF5	siNT	18.8309	36.3053	0.947075	5.84465	5e-05	0.000141705	yes
LGR5	LGR5	LGR5	chr12:71833812-71978621	siKLF5	siNT	3.90443	7.52454	0.94649	4.90189	5e-05	0.000141705	yes
SYT17	SYT17	SYT17	chr16:19179637-19278554	siKLF5	siNT	1.22137	2.3527	0.945816	3.32763	5e-05	0.000141705	yes
OTUD3	OTUD3	OTUD3	chr1:20208887-20239437	siKLF5	siNT	1.48795	2.86413	0.944774	4.80485	5e-05	0.000141705	yes
ARHGEF2	ARHGEF2	ARHGEF2	chr1:155916629-155948336	siKLF5	siNT	13.6886	26.3466	0.944641	5.73795	5e-05	0.000141705	yes
FOXO4	FOXO4	FOXO4	chrX:70315998-70323384	siKLF5	siNT	2.20038	4.23479	0.944539	4.51918	5e-05	0.000141705	yes
ATP2A3	ATP2A3	ATP2A3	chr17:3827162-3867758	siKLF5	siNT	19.9277	38.3371	0.943968	5.81406	5e-05	0.000141705	yes
FAM160A2	FAM160A2	FAM160A2	chr11:6232563-6255941	siKLF5	siNT	4.04017	7.76548	0.942659	5.05037	5e-05	0.000141705	yes
HK1	HK1	HK1	chr10:71029755-71161637	siKLF5	siNT	17.6534	33.9194	0.942166	5.75435	5e-05	0.000141705	yes
SLC7A7	SLC7A7	SLC7A7	chr14:23242431-23289020	siKLF5	siNT	37.5835	72.1593	0.941088	5.78842	5e-05	0.000141705	yes
TAF8	TAF8	TAF8	chr6:42018250-42048644	siKLF5	siNT	8.58926	16.4776	0.939897	5.58662	5e-05	0.000141705	yes
STRIP2	STRIP2	STRIP2	chr7:129074273-129128239	siKLF5	siNT	0.887425	1.70114	0.938803	3.28689	5e-05	0.000141705	yes
FGFRL1	FGFRL1	FGFRL1	chr4:1005609-1020686	siKLF5	siNT	22.8588	43.8182	0.938778	5.76664	5e-05	0.000141705	yes
PROX1	PROX1	PROX1	chr1:214161277-214214847	siKLF5	siNT	0.571154	1.09337	0.936829	4.25999	5e-05	0.000141705	yes
PDLIM2	PDLIM2	PDLIM2	chr8:22436253-22455538	siKLF5	siNT	7.3791	14.1107	0.935272	4.9131	5e-05	0.000141705	yes
VSTM5	VSTM5	VSTM5	chr11:93553734-93583668	siKLF5	siNT	1.05347	2.01406	0.934958	1.57791	0.009	0.0169343	yes
CAPN5	CAPN5	CAPN5	chr11:76777991-76837198	siKLF5	siNT	32.9001	62.8649	0.934165	5.82072	5e-05	0.000141705	yes
MICAL1	MICAL1	MICAL1	chr6:109765265-109777190	siKLF5	siNT	1.30191	2.48363	0.931816	4.17129	5e-05	0.000141705	yes
ARHGAP27	ARHGAP27	ARHGAP27	chr17_ctg5_hap1:121842-125407	siKLF5	siNT	5.46513	10.4212	0.931196	4.3612	5e-05	0.000141705	yes
TBC1D2B	TBC1D2B	TBC1D2B	chr15:78287326-78369994	siKLF5	siNT	1.6514	3.14763	0.930572	4.74807	5e-05	0.000141705	yes
S100A10	S100A10	S100A10	chr1:151955385-151966714	siKLF5	siNT	569.863	1085.09	0.929132	5.71053	5e-05	0.000141705	yes
LFNG	LFNG	LFNG	chr7:2552162-2568810	siKLF5	siNT	11.716	22.2994	0.928518	5.25751	5e-05	0.000141705	yes
MCM5	MCM5	MCM5	chr22:35796115-35820495	siKLF5	siNT	50.6429	96.3641	0.928137	5.76033	5e-05	0.000141705	yes
EIF5B	EIF5B	EIF5B	chr2:99953833-100016728	siKLF5	siNT	20.5529	39.1026	0.927918	5.72513	5e-05	0.000141705	yes
SPECC1	SPECC1	SPECC1	chr17:19912648-20218072	siKLF5	siNT	7.3557	13.9931	0.927786	5.36652	5e-05	0.000141705	yes
LOC100505806	LOC100505806	LOC100505806	chr5:9546311-9550409	siKLF5	siNT	5.0503	9.6057	0.927522	4.38441	5e-05	0.000141705	yes
ELF4	ELF4	ELF4	chrX:129198894-129244688	siKLF5	siNT	7.24855	13.7832	0.927147	5.43543	5e-05	0.000141705	yes
GARS	GARS	GARS	chr7:30634180-30673648	siKLF5	siNT	57.9893	110.237	0.926747	5.77899	5e-05	0.000141705	yes
ABO	ABO	ABO	chr9:136130562-136150630	siKLF5	siNT	21.8186	41.43	0.925115	5.42463	5e-05	0.000141705	yes
BRCA1	BRCA1	BRCA1	chr17:41196311-41277500	siKLF5	siNT	4.41315	8.352	0.920313	5.04192	5e-05	0.000141705	yes
IGFBP3	IGFBP3	IGFBP3	chr7:45951843-45960871	siKLF5	siNT	0.678239	1.28332	0.920017	2.89291	5e-05	0.000141705	yes
TRIM3	TRIM3	TRIM3	chr11:6469842-6495689	siKLF5	siNT	4.27003	8.0679	0.917947	4.77787	5e-05	0.000141705	yes
MYOF	MYOF	MYOF	chr10:95066185-95242074	siKLF5	siNT	21.2372	40.1161	0.91759	5.70035	5e-05	0.000141705	yes
CYB5R2	CYB5R2	CYB5R2	chr11:7686325-7694821	siKLF5	siNT	5.70888	10.7831	0.917488	4.32258	5e-05	0.000141705	yes
ANXA11	ANXA11	ANXA11	chr10:81914879-81965328	siKLF5	siNT	66.9577	126.374	0.916383	5.7065	5e-05	0.000141705	yes
AMOT	AMOT	AMOT	chrX:112018104-112084043	siKLF5	siNT	5.20395	9.81135	0.914845	5.41266	5e-05	0.000141705	yes
CEP170B	CEP170B	CEP170B	chr14:105331649-105363107	siKLF5	siNT	16.6444	31.3675	0.914237	5.66499	5e-05	0.000141705	yes
KLF2	KLF2	KLF2	chr19:16435650-16438339	siKLF5	siNT	3.91622	7.37142	0.912482	4.19631	5e-05	0.000141705	yes
NXN	NXN	NXN	chr17:702552-882998	siKLF5	siNT	17.331	32.6137	0.912126	5.52192	5e-05	0.000141705	yes
ARHGEF38	ARHGEF38	ARHGEF38	chr4:106473776-106602070	siKLF5	siNT	0.895667	1.68486	0.911593	2.2966	0.0004	0.000994575	yes
C5orf4	C5orf4	C5orf4	chr5:154198051-154230213	siKLF5	siNT	1.36502	2.56475	0.909897	3.87031	5e-05	0.000141705	yes
H19	H19	H19	chr11:2016405-2019065	siKLF5	siNT	0.822693	1.54468	0.908884	2.93548	5e-05	0.000141705	yes
TEAD1	TEAD1	TEAD1	chr11:12695968-12966284	siKLF5	siNT	3.80978	7.14493	0.907211	5.38657	5e-05	0.000141705	yes
HK2	HK2	HK2	chr2:75059781-75120481	siKLF5	siNT	13.7391	25.7437	0.90593	5.6143	5e-05	0.000141705	yes
GLCCI1	GLCCI1	GLCCI1	chr7:8008373-8128709	siKLF5	siNT	0.538563	1.00857	0.905117	3.35261	5e-05	0.000141705	yes
GAL3ST4	GAL3ST4	GAL3ST4	chr7:99756864-99766373	siKLF5	siNT	2.25915	4.23066	0.9051	4.12173	5e-05	0.000141705	yes
PROSER2	PROSER2	PROSER2	chr10:11865396-11936709	siKLF5	siNT	2.94566	5.51513	0.904804	4.55883	5e-05	0.000141705	yes
GNS	GNS	GNS	chr12:65107221-65153226	siKLF5	siNT	25.6257	47.9768	0.904747	5.63576	5e-05	0.000141705	yes
PCK2	PCK2	PCK2	chr14:24563482-24573339	siKLF5	siNT	21.9147	41.0146	0.904243	5.42497	5e-05	0.000141705	yes
MST1R	MST1R	MST1R	chr3:49924435-49941306	siKLF5	siNT	5.73968	10.7373	0.903593	5.23718	5e-05	0.000141705	yes
MBOAT2	MBOAT2	MBOAT2	chr2:8996700-9143876	siKLF5	siNT	2.76455	5.16939	0.90295	4.62154	5e-05	0.000141705	yes
JUNB	JUNB	JUNB	chr19:12902309-12904125	siKLF5	siNT	25.109	46.7591	0.897041	5.36687	5e-05	0.000141705	yes
NR4A1	NR4A1	NR4A1	chr12:52416615-52453291	siKLF5	siNT	1.82528	3.39815	0.896627	3.95822	5e-05	0.000141705	yes
ATG16L1	ATG16L1	ATG16L1	chr2:234160216-234204320	siKLF5	siNT	9.35158	17.4081	0.896473	5.20779	5e-05	0.000141705	yes
AGAP1	AGAP1	AGAP1	chr2:236402732-237040444	siKLF5	siNT	5.3301	9.92108	0.896336	4.44677	5e-05	0.000141705	yes
LOC730183	LOC730183	LOC730183	chr16:30709024-30709810	siKLF5	siNT	0.984426	1.83132	0.895528	1.4154	0.018	0.0316617	yes
CMIP	CMIP	CMIP	chr16:81478774-81745367	siKLF5	siNT	18.4604	34.2655	0.89232	5.48473	5e-05	0.000141705	yes
TCHP	TCHP	TCHP	chr12:110338078-110355874	siKLF5	siNT	1.84614	3.42569	0.891884	4.09194	5e-05	0.000141705	yes
ERF	ERF	ERF	chr19:42751716-42759309	siKLF5	siNT	13.9077	25.8032	0.891662	5.27661	5e-05	0.000141705	yes
OSMR	OSMR	OSMR	chr5:38845959-38935743	siKLF5	siNT	3.13906	5.81945	0.890549	3.75441	5e-05	0.000141705	yes
JUN	JUN	JUN	chr1:59246462-59249785	siKLF5	siNT	9.90178	18.3445	0.889592	5.22894	5e-05	0.000141705	yes
KCTD12	KCTD12	KCTD12	chr13:77454303-77460540	siKLF5	siNT	5.37673	9.94612	0.887405	5.23594	5e-05	0.000141705	yes
PCDH1	PCDH1	PCDH1	chr5:141232672-141257944	siKLF5	siNT	33.2331	61.4596	0.887019	5.48324	5e-05	0.000141705	yes
STK10	STK10	STK10	chr5:171469073-171615346	siKLF5	siNT	3.56706	6.59649	0.886962	5.03384	5e-05	0.000141705	yes
HOXC5	HOXC5	HOXC5	chr12:54410641-54449814	siKLF5	siNT	0.615687	1.13816	0.88643	1.51432	0.01305	0.023719	yes
TFF2	TFF2	TFF2	chr21:43766466-43771208	siKLF5	siNT	14.8927	27.5178	0.885758	4.29044	5e-05	0.000141705	yes
C1orf106	C1orf106	C1orf106	chr1:200860626-200884864	siKLF5	siNT	13.7775	25.447	0.885186	5.36427	5e-05	0.000141705	yes
RHOF	RHOF	RHOF	chr12:122150657-122231594	siKLF5	siNT	6.91393	12.7674	0.884889	3.96584	5e-05	0.000141705	yes
EPHA4	EPHA4	EPHA4	chr2:222282746-222437010	siKLF5	siNT	1.5061	2.77605	0.882213	4.45396	5e-05	0.000141705	yes
ASAP2	ASAP2	ASAP2	chr2:9346893-9545812	siKLF5	siNT	19.525	35.9789	0.881825	5.4496	5e-05	0.000141705	yes
TCOF1	TCOF1	TCOF1	chr5:149737201-149779871	siKLF5	siNT	9.14437	16.8487	0.881681	5.30055	5e-05	0.000141705	yes
CDC25B	CDC25B	CDC25B	chr20:3776400-3786761	siKLF5	siNT	44.2878	81.5923	0.881524	5.51852	5e-05	0.000141705	yes
NCR3LG1	NCR3LG1	NCR3LG1	chr11:17373308-17398868	siKLF5	siNT	4.95305	9.12422	0.881384	5.17287	5e-05	0.000141705	yes
PSAPL1	PSAPL1	PSAPL1	chr4:7194373-7744564	siKLF5	siNT	7.00913	12.9092	0.881091	5.17635	5e-05	0.000141705	yes
PALM	PALM	PALM	chr19:708952-748330	siKLF5	siNT	1.09119	2.00967	0.881054	3.43279	5e-05	0.000141705	yes
RAB11FIP1	RAB11FIP1	RAB11FIP1	chr8:37716464-37757015	siKLF5	siNT	18.0702	33.2588	0.880127	5.39234	5e-05	0.000141705	yes
PMEPA1	PMEPA1	PMEPA1	chr20:56223447-56286592	siKLF5	siNT	3.55714	6.54623	0.879945	4.80685	5e-05	0.000141705	yes
IER5L	IER5L	IER5L	chr9:131937830-131940540	siKLF5	siNT	4.28302	7.86271	0.876397	4.54581	5e-05	0.000141705	yes
CRIP2	CRIP2	CRIP2	chr14:105939274-105946507	siKLF5	siNT	28.8565	52.8803	0.873833	5.11817	5e-05	0.000141705	yes
ARHGEF1	ARHGEF1	ARHGEF1	chr19:42387266-42411604	siKLF5	siNT	21.189	38.8168	0.873364	5.34916	5e-05	0.000141705	yes
FOSL1	FOSL1	FOSL1	chr11:65659691-65667997	siKLF5	siNT	9.0576	16.5834	0.87254	4.68102	5e-05	0.000141705	yes
ARAP2	ARAP2	ARAP2	chr4:36067619-36245979	siKLF5	siNT	1.38989	2.54271	0.871395	4.45926	5e-05	0.000141705	yes
LIF	LIF	LIF	chr22:30636435-30642840	siKLF5	siNT	3.02356	5.52974	0.870963	4.55455	5e-05	0.000141705	yes
FAM83E	FAM83E	FAM83E	chr19:49103856-49116694	siKLF5	siNT	4.91231	8.97856	0.870084	4.33237	5e-05	0.000141705	yes
MINK1	MINK1	MINK1	chr17:4736634-4806369	siKLF5	siNT	12.2004	22.2946	0.869765	5.26347	5e-05	0.000141705	yes
ADAP1	ADAP1	ADAP1	chr7:937536-994289	siKLF5	siNT	43.423	79.2476	0.867909	5.36702	5e-05	0.000141705	yes
POLA1	POLA1	POLA1	chrX:24712063-25015102	siKLF5	siNT	5.16818	9.42825	0.867335	5.02804	5e-05	0.000141705	yes
IQCE	IQCE	IQCE	chr7:2598631-2654368	siKLF5	siNT	4.06901	7.42021	0.866782	5.06936	5e-05	0.000141705	yes
ECM1	ECM1	ECM1	chr1:150480486-150486265	siKLF5	siNT	38.7431	70.6492	0.866736	5.33519	5e-05	0.000141705	yes
DUSP5	DUSP5	DUSP5	chr10:112257624-112271302	siKLF5	siNT	0.861835	1.57147	0.866635	2.97657	5e-05	0.000141705	yes
PTK6	PTK6	PTK6	chr20:62159775-62168723	siKLF5	siNT	17.3129	31.5459	0.865604	5.18181	5e-05	0.000141705	yes
CCDC120	CCDC120	CCDC120	chrX:48910960-48927510	siKLF5	siNT	2.19015	3.98293	0.862804	4.24842	5e-05	0.000141705	yes
DPF1	DPF1	DPF1	chr19:38701648-38720317	siKLF5	siNT	0.698615	1.26945	0.861637	2.52163	5e-05	0.000141705	yes
CEP72	CEP72	CEP72	chr5:612404-653666	siKLF5	siNT	2.64664	4.80716	0.86102	3.98501	5e-05	0.000141705	yes
DCAF4	DCAF4	DCAF4	chr14:73393039-73426357	siKLF5	siNT	5.01047	9.09992	0.860908	4.51963	5e-05	0.000141705	yes
ATAD2	ATAD2	ATAD2	chr8:124332090-124408705	siKLF5	siNT	27.0667	49.1155	0.859661	5.35842	5e-05	0.000141705	yes
SERPINB8	SERPINB8	SERPINB8	chr18:61637262-61656608	siKLF5	siNT	1.08154	1.96092	0.858447	2.68254	5e-05	0.000141705	yes
GOLGA8A	GOLGA8A	GOLGA8A	chr15:34671269-34729667	siKLF5	siNT	0.910493	1.65058	0.858252	3.59186	5e-05	0.000141705	yes
FAM63B	FAM63B	FAM63B	chr15:59063392-59149734	siKLF5	siNT	0.560331	1.01519	0.857404	3.33799	5e-05	0.000141705	yes
TTLL12	TTLL12	TTLL12	chr22:43562627-43583137	siKLF5	siNT	41.8025	75.7233	0.857149	5.33994	5e-05	0.000141705	yes
AMOTL2	AMOTL2	AMOTL2	chr3:134074189-134093406	siKLF5	siNT	6.99899	12.6774	0.857045	5.0689	5e-05	0.000141705	yes
DPYSL2	DPYSL2	DPYSL2	chr8:26371708-26515693	siKLF5	siNT	36.3342	65.6748	0.854012	5.34656	5e-05	0.000141705	yes
AQP5	AQP5	AQP5	chr12:50355278-50359465	siKLF5	siNT	75.104	135.742	0.853901	5.30498	5e-05	0.000141705	yes
KLK8	KLK8	KLK8	chr19:51499263-51504958	siKLF5	siNT	4.33682	7.83166	0.852681	2.51232	5e-05	0.000141705	yes
AATF	AATF	AATF	chr17:35306174-35414171	siKLF5	siNT	14.5692	26.2789	0.850987	4.96226	5e-05	0.000141705	yes
DGKQ	DGKQ	DGKQ	chr4:952671-967348	siKLF5	siNT	4.82083	8.6911	0.850255	4.82789	5e-05	0.000141705	yes
AARS	AARS	AARS	chr16:70286296-70323412	siKLF5	siNT	42.2153	76.0815	0.84978	5.29562	5e-05	0.000141705	yes
ZYX	ZYX	ZYX	chr7:143078359-143220540	siKLF5	siNT	21.4791	38.7069	0.849655	4.21305	5e-05	0.000141705	yes
SLC1A5	SLC1A5	SLC1A5	chr19:47278139-47291842	siKLF5	siNT	241.51	434.926	0.848687	4.97821	5e-05	0.000141705	yes
USH1C	USH1C	USH1C	chr11:17515441-17565963	siKLF5	siNT	23.7215	42.7186	0.848672	5.12879	5e-05	0.000141705	yes
INPP1	INPP1	INPP1	chr2:191208195-191236391	siKLF5	siNT	8.73583	15.7291	0.848419	4.65698	5e-05	0.000141705	yes
FAM171A1	FAM171A1	FAM171A1	chr10:15253643-15413058	siKLF5	siNT	9.60495	17.2858	0.84774	5.0241	5e-05	0.000141705	yes
TTC7A	TTC7A	TTC7A	chr2:47129008-47303275	siKLF5	siNT	13.8922	24.999	0.847598	2.77611	5e-05	0.000141705	yes
AATK	AATK	AATK	chr17:79008946-79156964	siKLF5	siNT	0.61544	1.10746	0.847565	1.29955	0.0265	0.0449213	yes
ZFPM1	ZFPM1	ZFPM1	chr16:88520013-88601574	siKLF5	siNT	8.91513	16.0387	0.84723	4.91367	5e-05	0.000141705	yes
FAM129B	FAM129B	FAM129B	chr9:130267617-130341268	siKLF5	siNT	80.7321	145.191	0.846742	5.30886	5e-05	0.000141705	yes
DBN1	DBN1	DBN1	chr5:176883613-176900694	siKLF5	siNT	8.26981	14.872	0.846676	4.8431	5e-05	0.000141705	yes
RIN3	RIN3	RIN3	chr14:92980124-93155334	siKLF5	siNT	1.69042	3.03568	0.844637	3.90756	5e-05	0.000141705	yes
MTHFD1L	MTHFD1L	MTHFD1L	chr6:151186814-151423023	siKLF5	siNT	11.1926	20.0847	0.84356	4.03745	5e-05	0.000141705	yes
ITGA2	ITGA2	ITGA2	chr5:52285155-52390609	siKLF5	siNT	4.25642	7.63772	0.843501	4.95996	5e-05	0.000141705	yes
STXBP1	STXBP1	STXBP1	chr9:130374485-130454995	siKLF5	siNT	9.00779	16.1623	0.843391	4.97625	5e-05	0.000141705	yes
SLCO2B1	SLCO2B1	SLCO2B1	chr11:74862031-74917445	siKLF5	siNT	15.436	27.6933	0.843235	5.11933	5e-05	0.000141705	yes
RARG	RARG	RARG	chr12:53604349-53626040	siKLF5	siNT	7.06468	12.6669	0.842371	4.70983	5e-05	0.000141705	yes
TIMP2	TIMP2	TIMP2	chr17:76849058-76921472	siKLF5	siNT	30.1069	53.9521	0.841586	5.22328	5e-05	0.000141705	yes
VILL	VILL	VILL	chr3:38035077-38048676	siKLF5	siNT	17.1094	30.6332	0.840306	5.05049	5e-05	0.000141705	yes
NCOR1	NCOR1	NCOR1	chr17:15933407-16118874	siKLF5	siNT	19.0875	34.1746	0.840295	4.48797	5e-05	0.000141705	yes
TJP1	TJP1	TJP1	chr15:29992356-30114706	siKLF5	siNT	15.4538	27.6642	0.840059	5.20509	5e-05	0.000141705	yes
CBX4	CBX4	CBX4	chr17:77806954-77813213	siKLF5	siNT	23.167	41.4604	0.839664	5.10912	5e-05	0.000141705	yes
SCIN	SCIN	SCIN	chr7:12610202-12693228	siKLF5	siNT	2.57089	4.59745	0.838568	4.08742	5e-05	0.000141705	yes
NFIX	NFIX	NFIX	chr19:13106583-13209610	siKLF5	siNT	2.80947	5.0211	0.837703	4.57962	5e-05	0.000141705	yes
NCL	NCL	NCL	chr2:232319458-232329205	siKLF5	siNT	204.77	365.885	0.837383	5.12537	5e-05	0.000141705	yes
SART1	SART1	SART1	chr11:65729159-65747607	siKLF5	siNT	12.4582	22.2295	0.835377	5.00607	5e-05	0.000141705	yes
TAF15	TAF15	TAF15	chr17:34136458-34174246	siKLF5	siNT	34.8416	62.1423	0.834767	5.08641	5e-05	0.000141705	yes
CCDC9	CCDC9	CCDC9	chr19:47759730-47775210	siKLF5	siNT	13.8649	24.7264	0.834615	4.82769	5e-05	0.000141705	yes
MAP7D1	MAP7D1	MAP7D1	chr1:36621802-36646441	siKLF5	siNT	12.2761	21.8887	0.834337	4.96193	5e-05	0.000141705	yes
MCM7	MCM7	MCM7	chr7:99690403-99723128	siKLF5	siNT	82.6419	147.326	0.834068	4.65661	5e-05	0.000141705	yes
SLC16A5	SLC16A5	SLC16A5	chr17:73083821-73102255	siKLF5	siNT	22.0469	39.2854	0.833418	5.01266	5e-05	0.000141705	yes
RAB6B	RAB6B	RAB6B	chr3:133543079-133614691	siKLF5	siNT	1.2373	2.20215	0.831715	3.91361	5e-05	0.000141705	yes
RRP12	RRP12	RRP12	chr10:99116457-99161127	siKLF5	siNT	6.15065	10.9459	0.831582	4.80406	5e-05	0.000141705	yes
SLC1A4	SLC1A4	SLC1A4	chr2:65215578-65251000	siKLF5	siNT	3.72827	6.63073	0.830662	4.58098	5e-05	0.000141705	yes
MCM6	MCM6	MCM6	chr2:136597195-136634047	siKLF5	siNT	23.837	42.3757	0.830033	5.12565	5e-05	0.000141705	yes
PLOD3	PLOD3	PLOD3	chr7:100849257-100867471	siKLF5	siNT	27.3149	48.5249	0.829039	3.11886	5e-05	0.000141705	yes
ZNF296	ZNF296	ZNF296	chr19:45574757-45579688	siKLF5	siNT	4.44675	7.89582	0.828339	3.87392	5e-05	0.000141705	yes
ACOT11	ACOT11	ACOT11	chr1:55013806-55100417	siKLF5	siNT	11.0245	19.574	0.828232	4.88112	5e-05	0.000141705	yes
BCL11B	BCL11B	BCL11B	chr14:99635624-99737822	siKLF5	siNT	1.45473	2.58275	0.828161	4.31364	5e-05	0.000141705	yes
TTYH3	TTYH3	TTYH3	chr7:2671602-2704436	siKLF5	siNT	41.3078	73.2854	0.827113	5.15243	5e-05	0.000141705	yes
SAFB	SAFB	SAFB	chr19:5623045-5668489	siKLF5	siNT	28.3924	50.3653	0.826924	5.10186	5e-05	0.000141705	yes
GPRIN1	GPRIN1	GPRIN1	chr5:176022802-176037131	siKLF5	siNT	1.87188	3.31938	0.826427	3.97971	5e-05	0.000141705	yes
ZAK	ZAK	ZAK	chr2:173940564-174146764	siKLF5	siNT	6.73081	11.9268	0.825354	4.59613	5e-05	0.000141705	yes
HNRNPD	HNRNPD	HNRNPD	chr4:83274466-83295149	siKLF5	siNT	87.0183	154.165	0.825086	5.12811	5e-05	0.000141705	yes
MYO10	MYO10	MYO10	chr5:16662015-16936385	siKLF5	siNT	10.6968	18.9499	0.825019	5.13281	5e-05	0.000141705	yes
ACTB	ACTB	ACTB	chr7:5566778-5570232	siKLF5	siNT	1208.87	2141.09	0.824679	4.6934	5e-05	0.000141705	yes
SHANK3	SHANK3	SHANK3	chr22:51113069-51171640	siKLF5	siNT	0.620961	1.09839	0.822819	3.59196	5e-05	0.000141705	yes
KIAA1161	KIAA1161	KIAA1161	chr9:34368906-34376894	siKLF5	siNT	9.76707	17.2589	0.821339	4.89943	5e-05	0.000141705	yes
MMP15	MMP15	MMP15	chr16:58059281-58080804	siKLF5	siNT	25.9345	45.8201	0.821112	5.09671	5e-05	0.000141705	yes
ADM2	ADM2	ADM2	chr22:50919984-50924866	siKLF5	siNT	2.9585	5.22091	0.819433	4.27616	5e-05	0.000141705	yes
CALB2	CALB2	CALB2	chr16:71392615-71424342	siKLF5	siNT	2.60706	4.59634	0.818065	3.24314	5e-05	0.000141705	yes
HNRNPU	HNRNPU	HNRNPU	chr1:245013601-245027827	siKLF5	siNT	65.6536	115.673	0.817112	5.05511	5e-05	0.000141705	yes
BOP1	BOP1	BOP1	chr8:145486055-145515120	siKLF5	siNT	35.025	61.6658	0.816087	5.01184	5e-05	0.000141705	yes
NUP50	NUP50	NUP50	chr22:45559725-45583890	siKLF5	siNT	16.838	29.6394	0.815795	5.05832	5e-05	0.000141705	yes
LMX1B	LMX1B	LMX1B	chr9:129376721-129463311	siKLF5	siNT	2.85632	5.02703	0.815549	4.48848	5e-05	0.000141705	yes
DNMT1	DNMT1	DNMT1	chr19:10244021-10305755	siKLF5	siNT	16.329	28.7116	0.814199	5.03106	5e-05	0.000141705	yes
FAM222A	FAM222A	FAM222A	chr12:110152186-110211292	siKLF5	siNT	1.41017	2.47947	0.814161	3.52093	5e-05	0.000141705	yes
MYEOV	MYEOV	MYEOV	chr11:69061621-69064754	siKLF5	siNT	4.15083	7.29557	0.813619	4.04729	5e-05	0.000141705	yes
CASP2	CASP2	CASP2	chr7:142985307-143004789	siKLF5	siNT	7.26995	12.7763	0.813456	4.74656	5e-05	0.000141705	yes
LAD1	LAD1	LAD1	chr1:201349965-201368669	siKLF5	siNT	60.7658	106.756	0.812985	5.0727	5e-05	0.000141705	yes
PKMYT1	PKMYT1	PKMYT1	chr16:3019341-3030540	siKLF5	siNT	11.1897	19.649	0.812287	2.70445	5e-05	0.000141705	yes
PTPN12	PTPN12	PTPN12	chr7:77166772-77269388	siKLF5	siNT	20.2424	35.534	0.811823	4.96679	5e-05	0.000141705	yes
DHX9	DHX9	DHX9	chr1:182808438-182857117	siKLF5	siNT	46.4993	81.6029	0.81141	5.0974	5e-05	0.000141705	yes
HNRNPA2B1	HNRNPA2B1	HNRNPA2B1	chr7:26229555-26240413	siKLF5	siNT	158.22	277.633	0.811248	4.965	5e-05	0.000141705	yes
CARS	CARS	CARS	chr11:3022151-3078681	siKLF5	siNT	26.6284	46.6605	0.809237	4.94546	5e-05	0.000141705	yes
SYNGR3	SYNGR3	SYNGR3	chr16:2039945-2044276	siKLF5	siNT	0.595196	1.04251	0.808622	2.1282	0.0003	0.000760714	yes
CORO2A	CORO2A	CORO2A	chr9:100883256-100954956	siKLF5	siNT	18.5299	32.4131	0.80672	4.98426	5e-05	0.000141705	yes
HID1	HID1	HID1	chr17:72946838-72968900	siKLF5	siNT	27.9659	48.8799	0.805572	4.97722	5e-05	0.000141705	yes
IRX5	IRX5	IRX5	chr16:54965110-54968395	siKLF5	siNT	1.13149	1.9772	0.805232	2.7914	5e-05	0.000141705	yes
HSPA1B	HSPA1B	HSPA1B	chr6_qbl_hap6:3089162-3091686	siKLF5	siNT	15.7634	27.5389	0.80489	4.77485	5e-05	0.000141705	yes
ZNF326	ZNF326	ZNF326	chr1:90460677-90494094	siKLF5	siNT	9.1221	15.9234	0.803712	4.55785	5e-05	0.000141705	yes
ATP6V0D1	ATP6V0D1	ATP6V0D1	chr16:67471916-67515089	siKLF5	siNT	22.4136	39.0809	0.802091	4.73078	5e-05	0.000141705	yes
TRIP10	TRIP10	TRIP10	chr19:6739706-6751529	siKLF5	siNT	23.0757	40.2307	0.801918	4.80748	5e-05	0.000141705	yes
VGF	VGF	VGF	chr7:100805789-100808852	siKLF5	siNT	0.997888	1.7388	0.801145	2.92135	5e-05	0.000141705	yes
GAR1	GAR1	GAR1	chr4:110736665-110745893	siKLF5	siNT	17.971	31.2898	0.800023	4.27862	5e-05	0.000141705	yes
MCM3	MCM3	MCM3	chr6:52128811-52149679	siKLF5	siNT	71.5765	124.622	0.800003	5.00233	5e-05	0.000141705	yes
LRRFIP1	LRRFIP1	LRRFIP1	chr2:238536223-238690290	siKLF5	siNT	29.6207	51.5314	0.798845	4.95273	5e-05	0.000141705	yes
TLCD2	TLCD2	TLCD2	chr17:1606083-1613662	siKLF5	siNT	0.692109	1.2036	0.798287	3.39547	5e-05	0.000141705	yes
GNA15	GNA15	GNA15	chr19:3136190-3163766	siKLF5	siNT	1.07277	1.86511	0.797922	2.76187	5e-05	0.000141705	yes
TTC22	TTC22	TTC22	chr1:55246751-55266941	siKLF5	siNT	5.79617	10.0671	0.796479	4.08995	5e-05	0.000141705	yes
DOHH	DOHH	DOHH	chr19:3490818-3500938	siKLF5	siNT	5.71594	9.91759	0.794999	4.0692	5e-05	0.000141705	yes
CTSE	CTSE	CTSE	chr1:206317458-206332104	siKLF5	siNT	498.179	864.076	0.794494	4.72901	5e-05	0.000141705	yes
KLC2	KLC2	KLC2	chr11:66024764-66035332	siKLF5	siNT	8.2789	14.3555	0.794098	4.4625	5e-05	0.000141705	yes
SLC7A6	SLC7A6	SLC7A6	chr16:68298418-68344868	siKLF5	siNT	4.5329	7.85966	0.794033	4.14799	5e-05	0.000141705	yes
CNN2	CNN2	CNN2	chr19:1026297-1039064	siKLF5	siNT	70.1819	121.621	0.793219	4.96011	5e-05	0.000141705	yes
CHAF1A	CHAF1A	CHAF1A	chr19:4402659-4443394	siKLF5	siNT	11.198	19.3971	0.792598	4.69277	5e-05	0.000141705	yes
FAM19A5	FAM19A5	FAM19A5	chr22:48885287-49147744	siKLF5	siNT	1.74878	3.0275	0.791781	3.34171	5e-05	0.000141705	yes
TSEN2	TSEN2	TSEN2	chr3:12525930-12574820	siKLF5	siNT	9.30801	16.1068	0.791127	4.38108	5e-05	0.000141705	yes
PACSIN3	PACSIN3	PACSIN3	chr11:47199072-47208010	siKLF5	siNT	15.6754	27.09	0.789257	4.57604	5e-05	0.000141705	yes
RFX1	RFX1	RFX1	chr19:14072341-14117134	siKLF5	siNT	2.39213	4.13227	0.788639	4.02239	5e-05	0.000141705	yes
ANKRD13B	ANKRD13B	ANKRD13B	chr17:27920526-27948441	siKLF5	siNT	3.66111	6.32433	0.788632	4.02541	5e-05	0.000141705	yes
TRMT6	TRMT6	TRMT6	chr20:5918485-5931173	siKLF5	siNT	12.8897	22.265	0.788564	4.57372	5e-05	0.000141705	yes
GEM	GEM	GEM	chr8:95261484-95274547	siKLF5	siNT	1.88089	3.24753	0.787929	3.30121	5e-05	0.000141705	yes
TFEB	TFEB	TFEB	chr6:41651715-41703997	siKLF5	siNT	27.5177	47.467	0.786565	4.79531	5e-05	0.000141705	yes
NR1D1	NR1D1	NR1D1	chr17:38218445-38256978	siKLF5	siNT	7.35355	12.6725	0.785188	3.19902	5e-05	0.000141705	yes
TSC22D3	TSC22D3	TSC22D3	chrX:106956451-107019017	siKLF5	siNT	3.34394	5.76147	0.78489	3.58515	5e-05	0.000141705	yes
BHLHA15	BHLHA15	BHLHA15	chr7:97841565-97842271	siKLF5	siNT	5.64294	9.71652	0.783993	3.07908	5e-05	0.000141705	yes
RASA4	RASA4	RASA4	chr7:102220092-102257205	siKLF5	siNT	0.677085	1.1651	0.78304	3.23595	5e-05	0.000141705	yes
CXCL1	CXCL1	CXCL1	chr4:74735108-74737019	siKLF5	siNT	3.26317	5.61404	0.782766	3.13749	5e-05	0.000141705	yes
DGKA	DGKA	DGKA	chr12:56324945-56347807	siKLF5	siNT	3.85585	6.63271	0.782549	3.94316	5e-05	0.000141705	yes
ENTPD7	ENTPD7	ENTPD7	chr10:101419262-101515894	siKLF5	siNT	2.3738	4.08287	0.782387	2.44306	0.00015	0.000398712	yes
KIAA1683	KIAA1683	KIAA1683	chr19:18367905-18385319	siKLF5	siNT	0.639262	1.09895	0.781645	2.81242	5e-05	0.000141705	yes
CD3EAP	CD3EAP	CD3EAP	chr19:45882891-45927177	siKLF5	siNT	6.20485	10.6529	0.779784	2.12985	0.00035	0.000877178	yes
MYCL1	MYCL1	MYCL1	chr1:40361095-40367687	siKLF5	siNT	0.826286	1.41842	0.779577	2.88666	5e-05	0.000141705	yes
RBBP8NL	RBBP8NL	RBBP8NL	chr20:60985292-61002629	siKLF5	siNT	1.99239	3.41844	0.778841	3.61216	5e-05	0.000141705	yes
KPNA7	KPNA7	KPNA7	chr7:98771196-98805089	siKLF5	siNT	1.00457	1.72342	0.778702	2.33147	5e-05	0.000141705	yes
SWAP70	SWAP70	SWAP70	chr11:9685627-9774507	siKLF5	siNT	3.54975	6.08189	0.776805	4.27484	5e-05	0.000141705	yes
SLC7A6OS	SLC7A6OS	SLC7A6OS	chr16:68298418-68344868	siKLF5	siNT	4.31547	7.39157	0.776364	1.80806	0.00165	0.00365895	yes
KIF5B	KIF5B	KIF5B	chr10:32297937-32345371	siKLF5	siNT	35.8831	61.4572	0.776278	4.84603	5e-05	0.000141705	yes
TTC9	TTC9	TTC9	chr14:71108503-71142077	siKLF5	siNT	2.98395	5.10984	0.776055	4.22166	5e-05	0.000141705	yes
ATRX	ATRX	ATRX	chrX:76760355-77041719	siKLF5	siNT	4.05162	6.93499	0.775396	4.66331	5e-05	0.000141705	yes
SLC9A3R1	SLC9A3R1	SLC9A3R1	chr17:72744750-72765499	siKLF5	siNT	77.0142	131.816	0.775332	4.82874	5e-05	0.000141705	yes
SFPQ	SFPQ	SFPQ	chr1:35649200-35658743	siKLF5	siNT	65.5426	112.176	0.775259	4.83101	5e-05	0.000141705	yes
TRAF3	TRAF3	TRAF3	chr14:103243815-103377837	siKLF5	siNT	2.17814	3.72585	0.774475	4.27153	5e-05	0.000141705	yes
URB2	URB2	URB2	chr1:229761980-229795946	siKLF5	siNT	7.36417	12.5938	0.774123	4.61438	5e-05	0.000141705	yes
GPR39	GPR39	GPR39	chr2:133174146-133429070	siKLF5	siNT	2.29736	3.92818	0.773883	2.97964	5e-05	0.000141705	yes
TNIK	TNIK	TNIK	chr3:170780291-171178197	siKLF5	siNT	10.3112	17.6096	0.772146	2.94917	5e-05	0.000141705	yes
LCOR	LCOR	LCOR	chr10:98592016-98724198	siKLF5	siNT	2.9259	4.99635	0.771996	4.28108	5e-05	0.000141705	yes
KIAA1211L	KIAA1211L	KIAA1211L	chr2:99410308-99552684	siKLF5	siNT	1.42688	2.43602	0.771658	3.43274	5e-05	0.000141705	yes
RAPGEF4	RAPGEF4	RAPGEF4	chr2:173587917-173917620	siKLF5	siNT	1.06518	1.81841	0.771579	3.39014	5e-05	0.000141705	yes
CTR9	CTR9	CTR9	chr11:10772810-10801290	siKLF5	siNT	16.9257	28.8758	0.770651	4.72774	5e-05	0.000141705	yes
MARC1	MARC1	MARC1	chr1:220960038-220987741	siKLF5	siNT	9.84567	16.7904	0.770076	4.33472	5e-05	0.000141705	yes
YARS	YARS	YARS	chr1:33240839-33324480	siKLF5	siNT	36.594	62.3793	0.769462	4.50136	5e-05	0.000141705	yes
STON2	STON2	STON2	chr14:81726993-81893748	siKLF5	siNT	2.53101	4.31377	0.769236	3.72786	5e-05	0.000141705	yes
GYS1	GYS1	GYS1	chr19:49471381-49496610	siKLF5	siNT	14.4653	24.6477	0.768862	4.62912	5e-05	0.000141705	yes
MSH3	MSH3	MSH3	chr5:79922044-80172634	siKLF5	siNT	1.43673	2.44782	0.768709	1.74581	0.0051	0.0101628	yes
HNRNPAB	HNRNPAB	HNRNPAB	chr5:177631507-177659803	siKLF5	siNT	131.6	224.114	0.76807	4.69099	5e-05	0.000141705	yes
SH2D3A	SH2D3A	SH2D3A	chr19:6752172-6767523	siKLF5	siNT	7.69051	13.094	0.767759	4.22626	5e-05	0.000141705	yes
UNC5A	UNC5A	UNC5A	chr5:176237559-176326333	siKLF5	siNT	2.21819	3.77379	0.766633	3.7276	5e-05	0.000141705	yes
PIK3C2B	PIK3C2B	PIK3C2B	chr1:204391757-204459474	siKLF5	siNT	8.53018	14.4935	0.764756	4.67175	5e-05	0.000141705	yes
MAP3K2	MAP3K2	MAP3K2	chr2:128056244-128100805	siKLF5	siNT	2.82233	4.79478	0.764581	4.471	5e-05	0.000141705	yes
POLD1	POLD1	POLD1	chr19:50887579-50921275	siKLF5	siNT	12.7365	21.6362	0.764473	4.58082	5e-05	0.000141705	yes
SEC24D	SEC24D	SEC24D	chr4:119643977-119757326	siKLF5	siNT	19.3729	32.8952	0.763835	4.69724	5e-05	0.000141705	yes
RTEL1	RTEL1	RTEL1	chr20:62289162-62367494	siKLF5	siNT	2.69205	4.57097	0.763795	2.11422	0.0002	0.000520576	yes
FLNA	FLNA	FLNA	chrX:153576899-153603006	siKLF5	siNT	52.4925	89.1102	0.763481	4.69318	5e-05	0.000141705	yes
SPIRE2	SPIRE2	SPIRE2	chr16:89894906-89937727	siKLF5	siNT	8.87998	15.0729	0.763326	4.42601	5e-05	0.000141705	yes
GPR56	GPR56	GPR56	chr16:57653909-57698944	siKLF5	siNT	37.6337	63.8118	0.761797	4.73295	5e-05	0.000141705	yes
PABPN1	PABPN1	PABPN1	chr14:23775970-23795394	siKLF5	siNT	5.46558	9.26471	0.761371	2.24347	5e-05	0.000141705	yes
SLCO4A1	SLCO4A1	SLCO4A1	chr20:61273796-61303647	siKLF5	siNT	37.4831	63.4864	0.760208	4.56714	5e-05	0.000141705	yes
PRKCD	PRKCD	PRKCD	chr3:53195222-53226733	siKLF5	siNT	14.8418	25.1346	0.760006	4.53237	5e-05	0.000141705	yes
UPF1	UPF1	UPF1	chr19:18942743-18979039	siKLF5	siNT	23.6391	39.993	0.75857	4.71501	5e-05	0.000141705	yes
AKAP2	AKAP2	AKAP2	chr9:112403067-112934791	siKLF5	siNT	2.3749	4.01408	0.757203	4.00882	5e-05	0.000141705	yes
HOMER1	HOMER1	HOMER1	chr5:78669785-78809700	siKLF5	siNT	1.34343	2.27051	0.757093	3.40582	5e-05	0.000141705	yes
PLCB3	PLCB3	PLCB3	chr11:64018994-64036924	siKLF5	siNT	15.4653	26.1347	0.756933	4.66188	5e-05	0.000141705	yes
CTSD	CTSD	CTSD	chr11:1490684-1785501	siKLF5	siNT	428.891	724.721	0.756813	4.49197	5e-05	0.000141705	yes
ZC3H18	ZC3H18	ZC3H18	chr16:88636788-88698372	siKLF5	siNT	15.9006	26.8432	0.755472	4.59437	5e-05	0.000141705	yes
IFFO2	IFFO2	IFFO2	chr1:19230773-19282826	siKLF5	siNT	8.84079	14.9086	0.753892	4.56027	5e-05	0.000141705	yes
COBL	COBL	COBL	chr7:51083908-51384515	siKLF5	siNT	13.3882	22.5737	0.753681	4.62112	5e-05	0.000141705	yes
PDGFA	PDGFA	PDGFA	chr7:536896-559481	siKLF5	siNT	2.55586	4.30575	0.752456	3.49767	5e-05	0.000141705	yes
MAP7D2	MAP7D2	MAP7D2	chrX:20024830-20135114	siKLF5	siNT	1.5306	2.5772	0.751708	3.44362	5e-05	0.000141705	yes
PRKCH	PRKCH	PRKCH	chr14:61788514-62017698	siKLF5	siNT	3.08074	5.18644	0.751466	3.83725	5e-05	0.000141705	yes
BCR	BCR	BCR	chr22:23522551-23660224	siKLF5	siNT	12.081	20.3229	0.750363	4.61508	5e-05	0.000141705	yes
WWC1	WWC1	WWC1	chr5:167719064-167899308	siKLF5	siNT	9.0835	15.276	0.749944	4.56826	5e-05	0.000141705	yes
HMGA1	HMGA1	HMGA1	chr6:34204576-34214008	siKLF5	siNT	490.028	823.627	0.749127	4.47416	5e-05	0.000141705	yes
GRK5	GRK5	GRK5	chr10:120967196-121215131	siKLF5	siNT	18.9437	31.8287	0.748613	4.49839	5e-05	0.000141705	yes
RBM25	RBM25	RBM25	chr14:73525220-73588076	siKLF5	siNT	18.8072	31.5955	0.748432	4.59468	5e-05	0.000141705	yes
HIC2	HIC2	HIC2	chr22:21771692-21805750	siKLF5	siNT	1.77698	2.9848	0.748206	3.91305	5e-05	0.000141705	yes
RRS1	RRS1	RRS1	chr8:67341262-67342968	siKLF5	siNT	30.2624	50.8186	0.747831	4.49331	5e-05	0.000141705	yes
MMP1	MMP1	MMP1	chr11:102654406-102714342	siKLF5	siNT	191.153	320.942	0.747588	4.61518	5e-05	0.000141705	yes
PELP1	PELP1	PELP1	chr17:4574678-4607632	siKLF5	siNT	15.5489	26.1028	0.747394	4.54695	5e-05	0.000141705	yes
SLC3A2	SLC3A2	SLC3A2	chr11:62623483-62656355	siKLF5	siNT	108.502	182.109	0.747083	4.62815	5e-05	0.000141705	yes
HSPA2	HSPA2	HSPA2	chr14:65007185-65009954	siKLF5	siNT	5.21397	8.74658	0.746338	3.99126	5e-05	0.000141705	yes
ABHD4	ABHD4	ABHD4	chr14:23067146-23081265	siKLF5	siNT	21.0575	35.3107	0.745772	4.5056	5e-05	0.000141705	yes
MUC6	MUC6	MUC6	chr11:1012823-1036706	siKLF5	siNT	3.9833	6.67562	0.744939	4.36394	5e-05	0.000141705	yes
NTRK2	NTRK2	NTRK2	chr9:87283465-87638505	siKLF5	siNT	1.61282	2.70169	0.744274	3.7936	5e-05	0.000141705	yes
ST3GAL4	ST3GAL4	ST3GAL4	chr11:126225539-126284536	siKLF5	siNT	28.2493	47.3173	0.744152	4.45491	5e-05	0.000141705	yes
SAFB2	SAFB2	SAFB2	chr19:5587009-5622938	siKLF5	siNT	13.3925	22.4258	0.743736	4.44389	5e-05	0.000141705	yes
RBM28	RBM28	RBM28	chr7:127950435-127983962	siKLF5	siNT	8.49647	14.2256	0.743558	4.236	5e-05	0.000141705	yes
SBF1	SBF1	SBF1	chr22:50781745-50913464	siKLF5	siNT	16.5017	27.6133	0.742752	4.00424	5e-05	0.000141705	yes
PLCG2	PLCG2	PLCG2	chr16:81812898-81991899	siKLF5	siNT	0.99534	1.66421	0.741577	3.06737	5e-05	0.000141705	yes
SP2	SP2	SP2	chr17:45973515-46006323	siKLF5	siNT	7.47593	12.4964	0.741191	4.20259	5e-05	0.000141705	yes
GSN	GSN	GSN	chr9:124030379-124095120	siKLF5	siNT	27.1829	45.4261	0.740821	4.52564	5e-05	0.000141705	yes
HSPBP1	HSPBP1	HSPBP1	chr19:55773590-55791751	siKLF5	siNT	29.5926	49.451	0.740763	4.4476	5e-05	0.000141705	yes
LRRC8A	LRRC8A	LRRC8A	chr9:131644390-131680317	siKLF5	siNT	22.7418	37.9798	0.739884	4.58794	5e-05	0.000141705	yes
MAPK3	MAPK3	MAPK3	chr16:30125425-30134630	siKLF5	siNT	29.7566	49.6862	0.739632	4.47057	5e-05	0.000141705	yes
VCL	VCL	VCL	chr10:75757871-75879914	siKLF5	siNT	21.1992	35.3967	0.739609	4.5849	5e-05	0.000141705	yes
HNRNPM	HNRNPM	HNRNPM	chr19:8509802-8554002	siKLF5	siNT	115.029	191.887	0.73826	4.59088	5e-05	0.000141705	yes
SPRYD3	SPRYD3	SPRYD3	chr12:53436972-53473204	siKLF5	siNT	8.75158	14.5967	0.738029	3.596	5e-05	0.000141705	yes
PKP3	PKP3	PKP3	chr11:394216-404908	siKLF5	siNT	50.0929	83.544	0.73793	4.59189	5e-05	0.000141705	yes
TACC2	TACC2	TACC2	chr10:123748688-124014057	siKLF5	siNT	8.53268	14.219	0.736749	4.03557	5e-05	0.000141705	yes
DVL1	DVL1	DVL1	chr1:1270657-1284492	siKLF5	siNT	12.7694	21.2738	0.736388	4.3471	5e-05	0.000141705	yes
NAB1	NAB1	NAB1	chr2:191513847-191557492	siKLF5	siNT	5.00842	8.33751	0.735262	4.16681	5e-05	0.000141705	yes
LOC100505633	LOC100505633	LOC100505633	chr1:159931013-159948876	siKLF5	siNT	7.49255	12.4627	0.734088	3.46803	5e-05	0.000141705	yes
SGK196	SGK196	SGK196	chr8:42948656-42978323	siKLF5	siNT	6.97046	11.5868	0.733152	3.71531	5e-05	0.000141705	yes
TRIM14	TRIM14	TRIM14	chr9:100818958-100881488	siKLF5	siNT	19.6996	32.7455	0.733128	2.71114	5e-05	0.000141705	yes
EPHB2	EPHB2	EPHB2	chr1:23037330-23241823	siKLF5	siNT	17.7325	29.4676	0.732733	4.51861	5e-05	0.000141705	yes
ITGA3	ITGA3	ITGA3	chr17:48133339-48167849	siKLF5	siNT	33.8369	56.223	0.732564	4.55631	5e-05	0.000141705	yes
TXNIP	TXNIP	TXNIP	chr1:145438461-145442628	siKLF5	siNT	37.8076	62.7707	0.731417	4.53801	5e-05	0.000141705	yes
CDC42BPA	CDC42BPA	CDC42BPA	chr1:227177565-227505826	siKLF5	siNT	11.6203	19.2652	0.729344	4.52069	5e-05	0.000141705	yes
DDR1	DDR1	DDR1	chr6_qbl_hap6:2144847-2160922	siKLF5	siNT	43.8885	72.7258	0.728625	4.50426	5e-05	0.000141705	yes
ARHGDIG	ARHGDIG	ARHGDIG	chr16:330605-333003	siKLF5	siNT	0.63552	1.05305	0.728569	1.27728	0.0278	0.0469049	yes
MFSD2A	MFSD2A	MFSD2A	chr1:40420783-40435628	siKLF5	siNT	4.99335	8.27222	0.728266	3.68907	5e-05	0.000141705	yes
SSBP3	SSBP3	SSBP3	chr1:54692194-54872092	siKLF5	siNT	21.5823	35.7537	0.728244	4.34672	5e-05	0.000141705	yes
LINC00263	LINC00263	LINC00263	chr10:102133332-102148111	siKLF5	siNT	2.53731	4.20285	0.728065	2.46287	5e-05	0.000141705	yes
NUDC	NUDC	NUDC	chr1:27248212-27273362	siKLF5	siNT	63.0431	104.411	0.727862	4.50703	5e-05	0.000141705	yes
PPAN	PPAN	PPAN	chr19:10216898-10230599	siKLF5	siNT	14.1647	23.4554	0.727615	2.03618	0.0007	0.00167213	yes
PLEKHG3	PLEKHG3	PLEKHG3	chr14:65171192-65211060	siKLF5	siNT	3.94516	6.5317	0.727377	4.00242	5e-05	0.000141705	yes
CANT1	CANT1	CANT1	chr17:76987797-77005899	siKLF5	siNT	137.189	227.116	0.727264	4.48105	5e-05	0.000141705	yes
CC2D1A	CC2D1A	CC2D1A	chr19:14016955-14041693	siKLF5	siNT	15.176	25.1221	0.727165	4.3985	5e-05	0.000141705	yes
CPLX1	CPLX1	CPLX1	chr4:778744-819945	siKLF5	siNT	8.64696	14.3031	0.726066	3.99686	5e-05	0.000141705	yes
CEBPA	CEBPA	CEBPA	chr19:33790839-33793430	siKLF5	siNT	17.3704	28.7272	0.725786	4.33189	5e-05	0.000141705	yes
BAIAP2	BAIAP2	BAIAP2	chr17:79008946-79156964	siKLF5	siNT	13.1776	21.7883	0.725461	4.20552	5e-05	0.000141705	yes
PSAT1	PSAT1	PSAT1	chr9:80912058-80945009	siKLF5	siNT	119.162	197.02	0.725414	4.51496	5e-05	0.000141705	yes
SLC2A6	SLC2A6	SLC2A6	chr9:136336215-136344276	siKLF5	siNT	1.49937	2.47719	0.724345	2.96836	5e-05	0.000141705	yes
POP1	POP1	POP1	chr8:99129520-99172069	siKLF5	siNT	7.87495	13.0101	0.724293	4.31752	5e-05	0.000141705	yes
BMS1	BMS1	BMS1	chr10:43277953-43330385	siKLF5	siNT	6.23805	10.3024	0.723819	4.3674	5e-05	0.000141705	yes
PLB1	PLB1	PLB1	chr2:28718937-28866653	siKLF5	siNT	1.53659	2.53612	0.722887	3.47826	5e-05	0.000141705	yes
PRKCZ	PRKCZ	PRKCZ	chr1:1981908-2144159	siKLF5	siNT	17.2216	28.4182	0.722598	2.9948	5e-05	0.000141705	yes
VGLL4	VGLL4	VGLL4	chr3:11314009-11762220	siKLF5	siNT	11.5027	18.9795	0.722471	3.50064	5e-05	0.000141705	yes
COL1A1	COL1A1	COL1A1	chr17:48261456-48279000	siKLF5	siNT	3.44202	5.6788	0.722329	4.05349	5e-05	0.000141705	yes
BLM	BLM	BLM	chr15:91260578-91358686	siKLF5	siNT	7.50987	12.3889	0.722187	4.24745	5e-05	0.000141705	yes
ZBTB7A	ZBTB7A	ZBTB7A	chr19:4045215-4066816	siKLF5	siNT	14.2081	23.4354	0.72198	4.39826	5e-05	0.000141705	yes
CTNNA1	CTNNA1	CTNNA1	chr5:138089106-138270723	siKLF5	siNT	76.4074	126.016	0.721827	4.50016	5e-05	0.000141705	yes
DHX38	DHX38	DHX38	chr16:72118755-72146811	siKLF5	siNT	9.19767	15.1655	0.721449	3.9284	5e-05	0.000141705	yes
SF3A1	SF3A1	SF3A1	chr22:30727976-30773894	siKLF5	siNT	22.088	36.399	0.720639	4.43075	5e-05	0.000141705	yes
KLF3	KLF3	KLF3	chr4:38614321-38703129	siKLF5	siNT	13.6926	22.5572	0.720188	4.42292	5e-05	0.000141705	yes
OSR1	OSR1	OSR1	chr2:19551245-19558372	siKLF5	siNT	2.48899	4.09972	0.719964	3.10229	5e-05	0.000141705	yes
BOD1L1	BOD1L1	BOD1L1	chr4:13570365-13629328	siKLF5	siNT	2.06492	3.39945	0.719216	4.05661	5e-05	0.000141705	yes
EIF3B	EIF3B	EIF3B	chr7:2394473-2420377	siKLF5	siNT	65.2906	107.438	0.718554	4.48594	5e-05	0.000141705	yes
TPM4	TPM4	TPM4	chr19:16178316-16213813	siKLF5	siNT	243.495	400.618	0.718334	4.40103	5e-05	0.000141705	yes
ID1	ID1	ID1	chr20:30193085-30194317	siKLF5	siNT	317.725	522.532	0.717739	4.46782	5e-05	0.000141705	yes
SUPT16H	SUPT16H	SUPT16H	chr14:21819630-21852425	siKLF5	siNT	35.6822	58.6662	0.717323	4.47547	5e-05	0.000141705	yes
NCOR2	NCOR2	NCOR2	chr12:124808956-125052010	siKLF5	siNT	21.1673	34.7976	0.717153	4.45147	5e-05	0.000141705	yes
TRIM26	TRIM26	TRIM26	chr6_ssto_hap7:1482639-1511683	siKLF5	siNT	7.96372	13.0873	0.71665	4.12362	5e-05	0.000141705	yes
FOXP4	FOXP4	FOXP4	chr6:41514163-41570122	siKLF5	siNT	57.0147	93.6861	0.716502	4.45679	5e-05	0.000141705	yes
EIF4G1	EIF4G1	EIF4G1	chr3:184032282-184053146	siKLF5	siNT	104.853	172.279	0.716385	4.41141	5e-05	0.000141705	yes
NCS1	NCS1	NCS1	chr9:132934856-132999583	siKLF5	siNT	4.90957	8.06432	0.715958	4.09539	5e-05	0.000141705	yes
CHTF18	CHTF18	CHTF18	chr16:838621-850733	siKLF5	siNT	4.24701	6.97085	0.714886	3.76304	5e-05	0.000141705	yes
EWSR1	EWSR1	EWSR1	chr22:29663997-29696515	siKLF5	siNT	63.9175	104.91	0.714868	4.45884	5e-05	0.000141705	yes
EXOC2	EXOC2	EXOC2	chr6:485137-693141	siKLF5	siNT	5.45096	8.94575	0.714692	4.08158	5e-05	0.000141705	yes
SFXN3	SFXN3	SFXN3	chr10:102790995-102800998	siKLF5	siNT	4.66945	7.6616	0.714392	3.81805	5e-05	0.000141705	yes
NEBL	NEBL	NEBL	chr10:21068902-21463852	siKLF5	siNT	3.8634	6.33894	0.714371	4.14071	5e-05	0.000141705	yes
PPP2R2C	PPP2R2C	PPP2R2C	chr4:6322304-6565327	siKLF5	siNT	1.11904	1.83572	0.714084	3.09629	5e-05	0.000141705	yes
TNFRSF14	TNFRSF14	TNFRSF14	chr1:2487207-2495267	siKLF5	siNT	4.43986	7.28325	0.714068	3.18114	5e-05	0.000141705	yes
MAD1L1	MAD1L1	MAD1L1	chr7:1855427-2272583	siKLF5	siNT	4.72201	7.74586	0.714025	3.73613	5e-05	0.000141705	yes
PRR15	PRR15	PRR15	chr7:29603426-29606911	siKLF5	siNT	43.6325	71.5722	0.713998	4.36481	5e-05	0.000141705	yes
BAIAP2L2	BAIAP2L2	BAIAP2L2	chr22:38480895-38506676	siKLF5	siNT	19.039	31.2239	0.713689	4.23752	5e-05	0.000141705	yes
IER2	IER2	IER2	chr19:13261281-13265718	siKLF5	siNT	30.0986	49.3538	0.713464	4.33597	5e-05	0.000141705	yes
SHH	SHH	SHH	chr7:155595557-155604967	siKLF5	siNT	3.58655	5.88059	0.713366	3.16325	5e-05	0.000141705	yes
RCN3	RCN3	RCN3	chr19:50030874-50046890	siKLF5	siNT	4.39841	7.21159	0.713335	3.40079	5e-05	0.000141705	yes
NOC2L	NOC2L	NOC2L	chr1:861120-894679	siKLF5	siNT	33.617	55.0731	0.712155	4.37343	5e-05	0.000141705	yes
ATAD3A	ATAD3A	ATAD3A	chr1:1447522-1470067	siKLF5	siNT	11.5462	18.9142	0.712056	4.10353	5e-05	0.000141705	yes
LAMB3	LAMB3	LAMB3	chr1:209788217-209825820	siKLF5	siNT	36.3115	59.4529	0.711322	4.41503	5e-05	0.000141705	yes
PTBP1	PTBP1	PTBP1	chr19:797391-812327	siKLF5	siNT	100.589	164.688	0.711264	4.4002	5e-05	0.000141705	yes
PIP5K1B	PIP5K1B	PIP5K1B	chr9:71320615-71624091	siKLF5	siNT	20.8845	34.18	0.710716	3.73243	5e-05	0.000141705	yes
USP43	USP43	USP43	chr17:9548853-9633003	siKLF5	siNT	1.23758	2.02505	0.710442	3.22062	5e-05	0.000141705	yes
IGFBP2	IGFBP2	IGFBP2	chr2:217498126-217529158	siKLF5	siNT	34.5509	56.5054	0.709665	4.23312	5e-05	0.000141705	yes
STEAP4	STEAP4	STEAP4	chr7:87905743-87936228	siKLF5	siNT	0.955942	1.56311	0.709426	3.02255	5e-05	0.000141705	yes
SLC12A4	SLC12A4	SLC12A4	chr16:67973786-68002597	siKLF5	siNT	1.19726	1.95761	0.709353	3.14955	5e-05	0.000141705	yes
HCFC1	HCFC1	HCFC1	chrX:153213007-153236819	siKLF5	siNT	16.413	26.8362	0.709342	4.41429	5e-05	0.000141705	yes
STAT5B	STAT5B	STAT5B	chr17:40351194-40428424	siKLF5	siNT	8.43789	13.7954	0.709231	4.24251	5e-05	0.000141705	yes
LIG1	LIG1	LIG1	chr19:48618702-48673560	siKLF5	siNT	23.4846	38.3855	0.708844	4.33404	5e-05	0.000141705	yes
MYO1D	MYO1D	MYO1D	chr17:30819627-31203902	siKLF5	siNT	19.2367	31.4208	0.70786	4.38276	5e-05	0.000141705	yes
GPATCH4	GPATCH4	GPATCH4	chr1:156564099-156571279	siKLF5	siNT	28.2713	46.1772	0.707844	4.32586	5e-05	0.000141705	yes
GPX2	GPX2	GPX2	chr14:65381078-65569413	siKLF5	siNT	1287.89	2102.68	0.707221	3.91631	5e-05	0.000141705	yes
SBNO1	SBNO1	SBNO1	chr12:123773655-123834988	siKLF5	siNT	5.81025	9.48413	0.706915	4.32058	5e-05	0.000141705	yes
TFAP2C	TFAP2C	TFAP2C	chr20:55204357-55214338	siKLF5	siNT	3.44572	5.62289	0.706504	3.52914	5e-05	0.000141705	yes
PLK2	PLK2	PLK2	chr5:57749809-57755966	siKLF5	siNT	2.45675	4.00902	0.706498	3.27606	5e-05	0.000141705	yes
SNX8	SNX8	SNX8	chr7:2291404-2354099	siKLF5	siNT	6.73473	10.99	0.706493	4.13246	5e-05	0.000141705	yes
TUBB2A	TUBB2A	TUBB2A	chr6:3153901-3157783	siKLF5	siNT	3.46485	5.65273	0.706156	3.13187	5e-05	0.000141705	yes
SH2D2A	SH2D2A	SH2D2A	chr1:156776034-156851642	siKLF5	siNT	2.65969	4.33905	0.706124	2.83812	5e-05	0.000141705	yes
FAM160B1	FAM160B1	FAM160B1	chr10:116581502-116659586	siKLF5	siNT	1.90966	3.11466	0.705761	3.18073	5e-05	0.000141705	yes
NOD1	NOD1	NOD1	chr7:30464142-30518393	siKLF5	siNT	0.854588	1.3934	0.705306	2.92772	5e-05	0.000141705	yes
FOXA3	FOXA3	FOXA3	chr19:46367517-46377055	siKLF5	siNT	26.1317	42.6053	0.705234	4.24533	5e-05	0.000141705	yes
DNM2	DNM2	DNM2	chr19:10828728-10942586	siKLF5	siNT	39.2386	63.9605	0.70491	4.37337	5e-05	0.000141705	yes
VSIG10L	VSIG10L	VSIG10L	chr19:51834794-51845378	siKLF5	siNT	10.0452	16.3663	0.704232	4.16349	5e-05	0.000141705	yes
NASP	NASP	NASP	chr1:46049659-46084578	siKLF5	siNT	31.6754	51.5985	0.703965	4.25352	5e-05	0.000141705	yes
FAM213B	FAM213B	FAM213B	chr1:2517898-2564481	siKLF5	siNT	14.5866	23.7584	0.703793	4.11349	5e-05	0.000141705	yes
NFKBIB	NFKBIB	NFKBIB	chr19:39369194-39399534	siKLF5	siNT	21.5324	35.0683	0.703659	2.84469	5e-05	0.000141705	yes
H1F0	H1F0	H1F0	chr22:38201113-38203443	siKLF5	siNT	173.452	282.294	0.702665	4.35984	5e-05	0.000141705	yes
TRIM15	TRIM15	TRIM15	chr6_ssto_hap7:1461434-1470925	siKLF5	siNT	2.47296	4.02064	0.701188	3.1296	5e-05	0.000141705	yes
RIMS3	RIMS3	RIMS3	chr1:41086351-41131324	siKLF5	siNT	0.763615	1.24093	0.700506	3.12607	5e-05	0.000141705	yes
GRB10	GRB10	GRB10	chr7:50657759-50861159	siKLF5	siNT	7.27192	11.8133	0.700004	4.15056	5e-05	0.000141705	yes
MPHOSPH8	MPHOSPH8	MPHOSPH8	chr13:20207787-20247599	siKLF5	siNT	8.20953	13.3354	0.699892	4.11501	5e-05	0.000141705	yes
ZNF37A	ZNF37A	ZNF37A	chr10:38383263-38412278	siKLF5	siNT	1.21934	1.98062	0.699847	3.40518	5e-05	0.000141705	yes
NAT10	NAT10	NAT10	chr11:34127110-34168458	siKLF5	siNT	20.8313	33.8364	0.699826	4.31071	5e-05	0.000141705	yes
NOP9	NOP9	NOP9	chr14:24769097-24774374	siKLF5	siNT	13.4856	21.9025	0.699671	4.01716	5e-05	0.000141705	yes
HGS	HGS	HGS	chr17:79650961-79669151	siKLF5	siNT	17.9694	29.1842	0.699648	4.22621	5e-05	0.000141705	yes
DDX11	DDX11	DDX11	chr12:31173696-31257725	siKLF5	siNT	5.94787	9.65795	0.699344	3.87173	5e-05	0.000141705	yes
TMEM241	TMEM241	TMEM241	chr18:20875978-21017925	siKLF5	siNT	3.26247	5.29701	0.699212	3.4913	5e-05	0.000141705	yes
USP2	USP2	USP2	chr11:119225924-119252436	siKLF5	siNT	0.874229	1.41872	0.698501	2.52438	5e-05	0.000141705	yes
RECQL5	RECQL5	RECQL5	chr17:73584138-73663269	siKLF5	siNT	2.88656	4.68275	0.698004	2.06391	0.0002	0.000520576	yes
DDX27	DDX27	DDX27	chr20:47835831-47860614	siKLF5	siNT	20.3194	32.9578	0.697763	4.21652	5e-05	0.000141705	yes
SMG9	SMG9	SMG9	chr19:44235300-44259142	siKLF5	siNT	16.6326	26.971	0.697397	4.12545	5e-05	0.000141705	yes
PLXNA2	PLXNA2	PLXNA2	chr1:208195587-208417665	siKLF5	siNT	3.70942	6.01419	0.697175	4.17141	5e-05	0.000141705	yes
MAP4K4	MAP4K4	MAP4K4	chr2:102314164-102511152	siKLF5	siNT	11.5351	18.7003	0.697025	4.30833	5e-05	0.000141705	yes
DDX51	DDX51	DDX51	chr12:132621139-132628880	siKLF5	siNT	3.14791	5.10311	0.696982	3.75081	5e-05	0.000141705	yes
GOLGA3	GOLGA3	GOLGA3	chr12:133345494-133405426	siKLF5	siNT	6.08956	9.86668	0.696227	3.79646	5e-05	0.000141705	yes
RRBP1	RRBP1	RRBP1	chr20:17594322-17662928	siKLF5	siNT	141.787	229.696	0.696005	4.29203	5e-05	0.000141705	yes
IGFBP4	IGFBP4	IGFBP4	chr17:38599675-38613982	siKLF5	siNT	23.5719	38.173	0.695484	4.19417	5e-05	0.000141705	yes
FUS	FUS	FUS	chr16:31191430-31206192	siKLF5	siNT	37.9177	61.3686	0.694629	4.30907	5e-05	0.000141705	yes
MYC	MYC	MYC	chr8:128748314-128753680	siKLF5	siNT	84.0273	135.99	0.694571	4.33677	5e-05	0.000141705	yes
PLEKHA2	PLEKHA2	PLEKHA2	chr8:38758752-38831430	siKLF5	siNT	7.41088	11.9904	0.694162	4.14145	5e-05	0.000141705	yes
SLC35C1	SLC35C1	SLC35C1	chr11:45825622-45834567	siKLF5	siNT	14.5948	23.6134	0.694156	4.16091	5e-05	0.000141705	yes
CHD4	CHD4	CHD4	chr12:6679247-6716551	siKLF5	siNT	34.5726	55.9362	0.694152	4.33517	5e-05	0.000141705	yes
INF2	INF2	INF2	chr14:105155942-105185947	siKLF5	siNT	29.1495	47.1225	0.692947	4.04807	5e-05	0.000141705	yes
COL6A1	COL6A1	COL6A1	chr21:47401662-47424963	siKLF5	siNT	5.00809	8.09158	0.69216	3.88568	5e-05	0.000141705	yes
CACNG4	CACNG4	CACNG4	chr17:64960979-65029518	siKLF5	siNT	2.48128	4.00896	0.692148	3.36732	5e-05	0.000141705	yes
NFATC1	NFATC1	NFATC1	chr18:77155771-77289323	siKLF5	siNT	1.47026	2.37441	0.691494	3.1349	5e-05	0.000141705	yes
PPP1R13L	PPP1R13L	PPP1R13L	chr19:45882891-45927177	siKLF5	siNT	7.21618	11.6531	0.691409	2.13246	0.00025	0.000640006	yes
TRIM11	TRIM11	TRIM11	chr1:228581376-228594517	siKLF5	siNT	10.4271	16.835	0.691132	3.98404	5e-05	0.000141705	yes
EFHD2	EFHD2	EFHD2	chr1:15736390-15756839	siKLF5	siNT	31.8261	51.3785	0.690955	4.23523	5e-05	0.000141705	yes
IDH3A	IDH3A	IDH3A	chr15:78441718-78462884	siKLF5	siNT	13.3206	21.5025	0.690848	4.0667	5e-05	0.000141705	yes
TLE3	TLE3	TLE3	chr15:70340542-70390256	siKLF5	siNT	6.28885	10.1507	0.690715	4.03623	5e-05	0.000141705	yes
SRRT	SRRT	SRRT	chr7:100472700-100486285	siKLF5	siNT	31.5992	50.9792	0.690019	4.25059	5e-05	0.000141705	yes
TOB2	TOB2	TOB2	chr22:41829491-41843027	siKLF5	siNT	23.4379	37.7947	0.689337	4.27515	5e-05	0.000141705	yes
HNRNPH1	HNRNPH1	HNRNPH1	chr5:179041178-179050722	siKLF5	siNT	81.7874	131.883	0.689312	4.28944	5e-05	0.000141705	yes
TBL1X	TBL1X	TBL1X	chrX:9431334-9687780	siKLF5	siNT	5.77922	9.31699	0.688989	4.05902	5e-05	0.000141705	yes
TEP1	TEP1	TEP1	chr14:20833825-20881579	siKLF5	siNT	1.49768	2.41427	0.688852	3.75799	5e-05	0.000141705	yes
SLC7A5	SLC7A5	SLC7A5	chr16:87863628-87903100	siKLF5	siNT	66.2202	106.733	0.688659	4.28655	5e-05	0.000141705	yes
PWWP2B	PWWP2B	PWWP2B	chr10:134210701-134231358	siKLF5	siNT	9.29177	14.9752	0.688553	3.86601	5e-05	0.000141705	yes
SPDEF	SPDEF	SPDEF	chr6:34505578-34524110	siKLF5	siNT	40.5301	65.314	0.688397	4.2305	5e-05	0.000141705	yes
LZTS2	LZTS2	LZTS2	chr10:102756863-102790914	siKLF5	siNT	5.99924	9.65946	0.687161	3.56163	5e-05	0.000141705	yes
TNRC6B	TNRC6B	TNRC6B	chr22:40440820-40731812	siKLF5	siNT	1.63013	2.62439	0.686996	3.95132	5e-05	0.000141705	yes
GNB1L	GNB1L	GNB1L	chr22:19775933-19842462	siKLF5	siNT	3.6897	5.94009	0.686982	1.31428	0.0222	0.0383089	yes
MDC1	MDC1	MDC1	chr6_ssto_hap7:1999890-2017765	siKLF5	siNT	2.65917	4.27924	0.686382	3.83428	5e-05	0.000141705	yes
SPHK1	SPHK1	SPHK1	chr17:74380689-74383941	siKLF5	siNT	6.25031	10.0581	0.686363	3.48401	5e-05	0.000141705	yes
SMC2	SMC2	SMC2	chr9:106856540-106903700	siKLF5	siNT	15.1204	24.3269	0.686058	4.23668	5e-05	0.000141705	yes
INPP5J	INPP5J	INPP5J	chr22:31518960-31530683	siKLF5	siNT	1.32839	2.13672	0.685717	2.61352	5e-05	0.000141705	yes
NRDE2	NRDE2	NRDE2	chr14:90744397-90798481	siKLF5	siNT	1.71577	2.7589	0.685237	3.18913	5e-05	0.000141705	yes
PRR5	PRR5	PRR5	chr22:45064426-45258664	siKLF5	siNT	6.45568	10.3803	0.685207	2.67073	5e-05	0.000141705	yes
PREX1	PREX1	PREX1	chr20:47240792-47444420	siKLF5	siNT	2.41878	3.88654	0.68421	3.72469	5e-05	0.000141705	yes
CFL1	CFL1	CFL1	chr11:65622284-65625804	siKLF5	siNT	565.567	908.535	0.683843	4.18745	5e-05	0.000141705	yes
GMPPB	GMPPB	GMPPB	chr3:49726949-49761384	siKLF5	siNT	12.195	19.5902	0.683841	2.6176	5e-05	0.000141705	yes
MORC2	MORC2	MORC2	chr22:31318294-31364187	siKLF5	siNT	8.06966	12.9631	0.683832	3.95208	5e-05	0.000141705	yes
SEPT5	SEPT5	SEPT5	chr22:19701986-19712297	siKLF5	siNT	0.687365	1.10402	0.683619	1.61471	0.00755	0.0144382	yes
MTHFD1	MTHFD1	MTHFD1	chr14:64854758-64926725	siKLF5	siNT	36.6056	58.783	0.683332	4.24603	5e-05	0.000141705	yes
CGN	CGN	CGN	chr1:151483861-151511167	siKLF5	siNT	22.2581	35.7376	0.683114	4.24046	5e-05	0.000141705	yes
CAPN1	CAPN1	CAPN1	chr11:64948685-64979477	siKLF5	siNT	56.1536	90.1388	0.682768	4.26978	5e-05	0.000141705	yes
SF1	SF1	SF1	chr11:64532075-64546316	siKLF5	siNT	57.6787	92.5759	0.682598	4.24151	5e-05	0.000141705	yes
PHLDB3	PHLDB3	PHLDB3	chr19:43979254-44008985	siKLF5	siNT	6.064	9.72853	0.681952	3.64979	5e-05	0.000141705	yes
SNRNP200	SNRNP200	SNRNP200	chr2:96940073-96971307	siKLF5	siNT	28.4159	45.5651	0.68123	4.25199	5e-05	0.000141705	yes
MARCH8	MARCH8	MARCH8	chr10:45952816-46090354	siKLF5	siNT	1.45753	2.33601	0.68052	2.70396	5e-05	0.000141705	yes
DCPS	DCPS	DCPS	chr11:126173646-126225482	siKLF5	siNT	41.4299	66.3676	0.679806	4.00952	5e-05	0.000141705	yes
OSBPL2	OSBPL2	OSBPL2	chr20:60813579-60871269	siKLF5	siNT	13.1063	20.9894	0.679397	4.11597	5e-05	0.000141705	yes
SLTM	SLTM	SLTM	chr15:59171243-59225852	siKLF5	siNT	9.48444	15.1866	0.679163	4.01875	5e-05	0.000141705	yes
FLJ22447	FLJ22447	FLJ22447	chr14:62037257-62121431	siKLF5	siNT	1.02732	1.64473	0.678961	1.82314	0.00235	0.00504193	yes
PPP1R12B	PPP1R12B	PPP1R12B	chr1:202317829-202557697	siKLF5	siNT	1.54444	2.47227	0.678747	1.72983	0.00175	0.00385911	yes
CXorf57	CXorf57	CXorf57	chrX:105855159-105922673	siKLF5	siNT	1.38269	2.21203	0.677893	3.02086	5e-05	0.000141705	yes
CAMSAP3	CAMSAP3	CAMSAP3	chr19:7660787-7683196	siKLF5	siNT	5.66102	9.05411	0.677509	3.84217	5e-05	0.000141705	yes
TRIM41	TRIM41	TRIM41	chr5:180650262-180662808	siKLF5	siNT	2.45594	3.92685	0.6771	3.25992	5e-05	0.000141705	yes
FEN1	FEN1	FEN1	chr11:61560108-61564714	siKLF5	siNT	29.1746	46.6281	0.676488	4.12473	5e-05	0.000141705	yes
CEBPB	CEBPB	CEBPB	chr20:48807119-48809227	siKLF5	siNT	20.1491	32.1935	0.676055	4.01351	5e-05	0.000141705	yes
SH3BP1	SH3BP1	SH3BP1	chr22:38035683-38052050	siKLF5	siNT	16.2191	25.9101	0.675821	4.01953	5e-05	0.000141705	yes
BDP1	BDP1	BDP1	chr5:70751441-70863649	siKLF5	siNT	0.826552	1.32021	0.675593	3.35741	5e-05	0.000141705	yes
ADCY6	ADCY6	ADCY6	chr12:49159974-49182820	siKLF5	siNT	3.80759	6.0811	0.675453	3.82624	5e-05	0.000141705	yes
HSPH1	HSPH1	HSPH1	chr13:31710762-31736117	siKLF5	siNT	40.027	63.9265	0.675441	4.20788	5e-05	0.000141705	yes
FAM3C	FAM3C	FAM3C	chr7:120988904-121036422	siKLF5	siNT	10.6356	16.9825	0.675145	3.87242	5e-05	0.000141705	yes
POLR2A	POLR2A	POLR2A	chr17:7387697-7417935	siKLF5	siNT	16.4029	26.19	0.675064	4.18456	5e-05	0.000141705	yes
ITGA6	ITGA6	ITGA6	chr2:173292313-173371181	siKLF5	siNT	102.833	164.148	0.674696	4.12563	5e-05	0.000141705	yes
PTMS	PTMS	PTMS	chr12:6875540-6880118	siKLF5	siNT	97.9279	156.301	0.674531	4.15128	5e-05	0.000141705	yes
DISP2	DISP2	DISP2	chr15:40650433-40663256	siKLF5	siNT	1.28767	2.05513	0.674465	3.12673	5e-05	0.000141705	yes
RBM6	RBM6	RBM6	chr3:49977476-50114685	siKLF5	siNT	6.06979	9.68476	0.674069	3.30754	5e-05	0.000141705	yes
MYBBP1A	MYBBP1A	MYBBP1A	chr17:4402128-4458681	siKLF5	siNT	8.54972	13.6407	0.673971	2.95874	5e-05	0.000141705	yes
MIDN	MIDN	MIDN	chr19:1248551-1259142	siKLF5	siNT	24.721	39.4325	0.673646	4.15823	5e-05	0.000141705	yes
BAG3	BAG3	BAG3	chr10:121410881-121437329	siKLF5	siNT	10.611	16.9252	0.673614	3.86657	5e-05	0.000141705	yes
ESAM	ESAM	ESAM	chr11:124623018-124632223	siKLF5	siNT	4.35161	6.93928	0.673237	3.20308	5e-05	0.000141705	yes
ALDH2	ALDH2	ALDH2	chr12:112204690-112247789	siKLF5	siNT	121.405	193.514	0.672613	4.20619	5e-05	0.000141705	yes
LOC729966	LOC729966	LOC729966	chr19:18360759-18366229	siKLF5	siNT	57.2913	91.2569	0.671617	3.89819	5e-05	0.000141705	yes
GAK	GAK	GAK	chr4:843064-926174	siKLF5	siNT	21.1321	33.6594	0.671574	4.14837	5e-05	0.000141705	yes
MRE11A	MRE11A	MRE11A	chr11:94150468-94227040	siKLF5	siNT	6.23552	9.92386	0.670391	3.90091	5e-05	0.000141705	yes
CCNYL1	CCNYL1	CCNYL1	chr2:208576263-208620896	siKLF5	siNT	3.28612	5.22738	0.669701	3.47537	5e-05	0.000141705	yes
ANP32E	ANP32E	ANP32E	chr1:150190716-150208504	siKLF5	siNT	20.7505	32.9932	0.669019	4.09797	5e-05	0.000141705	yes
MYO9B	MYO9B	MYO9B	chr19:17186590-17324104	siKLF5	siNT	6.67375	10.6088	0.668696	4.0525	5e-05	0.000141705	yes
LMNB2	LMNB2	LMNB2	chr19:2428162-2456966	siKLF5	siNT	67.0824	106.634	0.668666	4.1635	5e-05	0.000141705	yes
MARS	MARS	MARS	chr12:57881735-57914300	siKLF5	siNT	46.0879	73.2295	0.668037	4.04761	5e-05	0.000141705	yes
SYTL1	SYTL1	SYTL1	chr1:27668482-27680423	siKLF5	siNT	7.3133	11.6076	0.66647	3.53676	5e-05	0.000141705	yes
LUC7L2	LUC7L2	LUC7L2	chr7:139025104-139112272	siKLF5	siNT	34.3942	54.5893	0.666453	3.31139	5e-05	0.000141705	yes
PXN	PXN	PXN	chr12:120639093-120703574	siKLF5	siNT	24.5496	38.9564	0.666163	4.03589	5e-05	0.000141705	yes
E2F8	E2F8	E2F8	chr11:19245609-19263202	siKLF5	siNT	9.66409	15.3289	0.665546	3.90661	5e-05	0.000141705	yes
EIF3A	EIF3A	EIF3A	chr10:120794540-120840334	siKLF5	siNT	43.1433	68.428	0.665449	4.14996	5e-05	0.000141705	yes
RAD50	RAD50	RAD50	chr5:131892615-131980313	siKLF5	siNT	5.7336	9.09021	0.664872	3.93101	5e-05	0.000141705	yes
AHDC1	AHDC1	AHDC1	chr1:27860755-27930143	siKLF5	siNT	2.176	3.44846	0.664277	3.55145	5e-05	0.000141705	yes
PSMB2	PSMB2	PSMB2	chr1:36065142-36107445	siKLF5	siNT	13.6002	21.545	0.663727	4.05	5e-05	0.000141705	yes
KAT6B	KAT6B	KAT6B	chr10:76586170-76792380	siKLF5	siNT	2.26756	3.59212	0.663697	3.64483	5e-05	0.000141705	yes
NSUN5	NSUN5	NSUN5	chr7:72716513-72722864	siKLF5	siNT	9.77877	15.4907	0.663682	3.75907	5e-05	0.000141705	yes
SCRIB	SCRIB	SCRIB	chr8:144873089-144897549	siKLF5	siNT	22.3591	35.4141	0.663463	4.10605	5e-05	0.000141705	yes
RTF1	RTF1	RTF1	chr15:41709301-41775761	siKLF5	siNT	14.0865	22.3089	0.663309	4.06348	5e-05	0.000141705	yes
CAMSAP2	CAMSAP2	CAMSAP2	chr1:200708685-200829831	siKLF5	siNT	2.52513	3.99548	0.662008	3.67176	5e-05	0.000141705	yes
SOCS7	SOCS7	SOCS7	chr17:36508006-36561846	siKLF5	siNT	2.68492	4.24685	0.661514	3.72975	5e-05	0.000141705	yes
SLC7A1	SLC7A1	SLC7A1	chr13:30083550-30169825	siKLF5	siNT	31.0819	49.1576	0.661339	4.13062	5e-05	0.000141705	yes
SHB	SHB	SHB	chr9:37915894-38069210	siKLF5	siNT	17.8009	28.146	0.660975	4.0966	5e-05	0.000141705	yes
PAK4	PAK4	PAK4	chr19:39616419-39670046	siKLF5	siNT	37.261	58.9072	0.660777	4.04814	5e-05	0.000141705	yes
TRAM2	TRAM2	TRAM2	chr6:52362199-52441862	siKLF5	siNT	5.8105	9.18475	0.660577	3.93869	5e-05	0.000141705	yes
MCM10	MCM10	MCM10	chr10:13203553-13253104	siKLF5	siNT	9.2166	14.5687	0.660565	3.94871	5e-05	0.000141705	yes
SETD7	SETD7	SETD7	chr4:140427191-140477577	siKLF5	siNT	9.78601	15.4654	0.660252	4.0402	5e-05	0.000141705	yes
BAZ1B	BAZ1B	BAZ1B	chr7:72854727-72936615	siKLF5	siNT	15.9354	25.1836	0.660252	4.08361	5e-05	0.000141705	yes
PHGDH	PHGDH	PHGDH	chr1:120254418-120286849	siKLF5	siNT	22.3352	35.2961	0.660188	3.93063	5e-05	0.000141705	yes
SLC9A3R2	SLC9A3R2	SLC9A3R2	chr16:2076868-2089027	siKLF5	siNT	26.2325	41.4513	0.660062	3.93816	5e-05	0.000141705	yes
GNL3L	GNL3L	GNL3L	chrX:54556643-54593720	siKLF5	siNT	4.30542	6.8018	0.659764	3.89233	5e-05	0.000141705	yes
SMC1A	SMC1A	SMC1A	chrX:53401069-53449618	siKLF5	siNT	10.7296	16.9484	0.65955	4.08648	5e-05	0.000141705	yes
SMC3	SMC3	SMC3	chr10:112327448-112364392	siKLF5	siNT	16.6582	26.309	0.659325	4.02072	5e-05	0.000141705	yes
LOC100128338	LOC100128338	LOC100128338	chr8:144816309-144828507	siKLF5	siNT	24.907	39.3334	0.659206	4.02343	5e-05	0.000141705	yes
PNN	PNN	PNN	chr14:39644386-39652422	siKLF5	siNT	15.5408	24.533	0.658665	3.98354	5e-05	0.000141705	yes
TJP3	TJP3	TJP3	chr19:3708334-3761673	siKLF5	siNT	23.9024	37.7299	0.658555	3.86327	5e-05	0.000141705	yes
IGF2BP2	IGF2BP2	IGF2BP2	chr3:185361526-185542827	siKLF5	siNT	8.02039	12.66	0.658531	3.80568	5e-05	0.000141705	yes
PRICKLE4	PRICKLE4	PRICKLE4	chr6:41748499-41755110	siKLF5	siNT	9.47524	14.9561	0.658503	3.51659	5e-05	0.000141705	yes
PPFIA1	PPFIA1	PPFIA1	chr11:70116805-70230607	siKLF5	siNT	20.6372	32.5727	0.658421	3.99997	5e-05	0.000141705	yes
ZDHHC14	ZDHHC14	ZDHHC14	chr6:157802556-158094977	siKLF5	siNT	5.30635	8.37117	0.65771	3.51037	5e-05	0.000141705	yes
SRD5A1	SRD5A1	SRD5A1	chr5:6633499-6669675	siKLF5	siNT	5.34635	8.42322	0.655819	3.383	5e-05	0.000141705	yes
DDIT4	DDIT4	DDIT4	chr10:74033676-74035797	siKLF5	siNT	31.1231	49.0097	0.65508	3.94833	5e-05	0.000141705	yes
EPRS	EPRS	EPRS	chr1:220046618-220321383	siKLF5	siNT	40.4301	63.6654	0.655079	2.97601	5e-05	0.000141705	yes
VPS16	VPS16	VPS16	chr20:2815960-3019315	siKLF5	siNT	9.85413	15.5159	0.654943	1.96789	0.00065	0.00156242	yes
VARS	VARS	VARS	chr6_ssto_hap7:3076106-3093568	siKLF5	siNT	27.1639	42.7656	0.654763	4.06187	5e-05	0.000141705	yes
FAM111B	FAM111B	FAM111B	chr11:58874657-58894888	siKLF5	siNT	11.1444	17.5434	0.654619	3.86377	5e-05	0.000141705	yes
CCDC86	CCDC86	CCDC86	chr11:60609428-60623444	siKLF5	siNT	16.3304	25.7062	0.654557	3.80928	5e-05	0.000141705	yes
GLDC	GLDC	GLDC	chr9:6532463-6645692	siKLF5	siNT	2.64184	4.15709	0.654032	3.28898	5e-05	0.000141705	yes
S100A14	S100A14	S100A14	chr1:153586731-153588808	siKLF5	siNT	316.427	497.795	0.653679	4.07759	5e-05	0.000141705	yes
HOXB4	HOXB4	HOXB4	chr17:46652868-46655743	siKLF5	siNT	1.12304	1.76639	0.653404	2.2264	0.00015	0.000398712	yes
FAM214B	FAM214B	FAM214B	chr9:35104117-35115893	siKLF5	siNT	1.4982	2.35592	0.653061	2.80834	5e-05	0.000141705	yes
PTBP3	PTBP3	PTBP3	chr9:114758831-115112545	siKLF5	siNT	35.338	55.5516	0.652609	3.59966	5e-05	0.000141705	yes
ANKHD1	ANKHD1	ANKHD1	chr5:139781398-139929163	siKLF5	siNT	7.44467	11.6925	0.651302	2.09529	0.00025	0.000640006	yes
RHOBTB2	RHOBTB2	RHOBTB2	chr8:22844929-22941132	siKLF5	siNT	5.21148	8.17824	0.650098	1.94694	0.001	0.00231362	yes
TCERG1	TCERG1	TCERG1	chr5:145826872-145891069	siKLF5	siNT	13.405	21.0346	0.649998	3.92842	5e-05	0.000141705	yes
CCND3	CCND3	CCND3	chr6:41902670-42016610	siKLF5	siNT	107.259	168.301	0.649944	4.07436	5e-05	0.000141705	yes
EEF1A2	EEF1A2	EEF1A2	chr20:62119364-62130668	siKLF5	siNT	166.42	261.075	0.649632	4.04575	5e-05	0.000141705	yes
MPRIP	MPRIP	MPRIP	chr17:16946073-17095962	siKLF5	siNT	24.371	38.2298	0.649531	4.04949	5e-05	0.000141705	yes
DTL	DTL	DTL	chr1:212113740-212278187	siKLF5	siNT	6.02547	9.4481	0.648949	2.6318	5e-05	0.000141705	yes
CDCP1	CDCP1	CDCP1	chr3:45123768-45187914	siKLF5	siNT	9.45379	14.8237	0.648944	3.55161	5e-05	0.000141705	yes
VPS53	VPS53	VPS53	chr17:411907-618096	siKLF5	siNT	3.86567	6.06104	0.648845	2.67158	5e-05	0.000141705	yes
MAFK	MAFK	MAFK	chr7:1570367-1596066	siKLF5	siNT	8.08108	12.6694	0.648725	2.83504	5e-05	0.000141705	yes
PDXK	PDXK	PDXK	chr21:45138977-45182188	siKLF5	siNT	26.1297	40.9591	0.648495	4.05021	5e-05	0.000141705	yes
SFSWAP	SFSWAP	SFSWAP	chr12:132195631-132284283	siKLF5	siNT	5.71896	8.96361	0.648328	3.5854	5e-05	0.000141705	yes
FOXO1	FOXO1	FOXO1	chr13:41129800-41240734	siKLF5	siNT	1.99026	3.11914	0.648191	3.34498	5e-05	0.000141705	yes
AIFM2	AIFM2	AIFM2	chr10:71812356-71892690	siKLF5	siNT	10.7304	16.8077	0.647426	3.80914	5e-05	0.000141705	yes
SIRT7	SIRT7	SIRT7	chr17:79869814-79876058	siKLF5	siNT	16.3279	25.5679	0.646997	3.71299	5e-05	0.000141705	yes
DDX46	DDX46	DDX46	chr5:134094460-134166812	siKLF5	siNT	12.4732	19.5259	0.646562	3.9436	5e-05	0.000141705	yes
ITPK1	ITPK1	ITPK1	chr14:93403258-93582263	siKLF5	siNT	25.8288	40.4311	0.646485	4.01187	5e-05	0.000141705	yes
CDK11B	CDK11B	CDK11B	chr1:1571099-1655791	siKLF5	siNT	7.38146	11.5532	0.646316	2.56061	5e-05	0.000141705	yes
FLJ22184	FLJ22184	FLJ22184	chr19:7933604-7939326	siKLF5	siNT	0.869094	1.36021	0.646246	2.67393	5e-05	0.000141705	yes
NSUN2	NSUN2	NSUN2	chr5:6599351-6633473	siKLF5	siNT	21.8346	34.1678	0.646025	3.93465	5e-05	0.000141705	yes
RCOR2	RCOR2	RCOR2	chr11:63678692-63684316	siKLF5	siNT	2.08329	3.25955	0.645808	2.86013	5e-05	0.000141705	yes
DHX57	DHX57	DHX57	chr2:39024875-39103021	siKLF5	siNT	3.83104	5.99108	0.645078	3.56923	5e-05	0.000141705	yes
DROSHA	DROSHA	DROSHA	chr5:31400601-31532282	siKLF5	siNT	6.92497	10.8286	0.644968	3.8087	5e-05	0.000141705	yes
UTP3	UTP3	UTP3	chr4:71554195-71556268	siKLF5	siNT	12.1596	19.0111	0.644739	3.66589	5e-05	0.000141705	yes
CAPN2	CAPN2	CAPN2	chr1:223889294-223963720	siKLF5	siNT	27.6187	43.169	0.644347	3.97197	5e-05	0.000141705	yes
UPF2	UPF2	UPF2	chr10:11962020-12085169	siKLF5	siNT	7.84023	12.252	0.644044	3.85272	5e-05	0.000141705	yes
PLK3	PLK3	PLK3	chr1:45266035-45272957	siKLF5	siNT	1.71178	2.67424	0.64363	2.68278	5e-05	0.000141705	yes
MYH9	MYH9	MYH9	chr22:36677322-36784063	siKLF5	siNT	82.7159	129.217	0.643556	3.94013	5e-05	0.000141705	yes
TPM1	TPM1	TPM1	chr15:63334837-63364113	siKLF5	siNT	66.908	104.512	0.643417	3.93177	5e-05	0.000141705	yes
SYNCRIP	SYNCRIP	SYNCRIP	chr6:86317501-86353043	siKLF5	siNT	42.0574	65.6848	0.6432	3.75462	5e-05	0.000141705	yes
GPRIN2	GPRIN2	GPRIN2	chr10:46993545-47000568	siKLF5	siNT	0.937629	1.46436	0.643177	1.91106	0.00165	0.00365895	yes
SDC4	SDC4	SDC4	chr20:43953928-43977064	siKLF5	siNT	38.0578	59.4219	0.642804	3.97566	5e-05	0.000141705	yes
RNF20	RNF20	RNF20	chr9:104296132-104325626	siKLF5	siNT	15.1838	23.6995	0.64232	3.90027	5e-05	0.000141705	yes
THRAP3	THRAP3	THRAP3	chr1:36690016-36770957	siKLF5	siNT	25.5765	39.9207	0.642318	3.98643	5e-05	0.000141705	yes
GIGYF2	GIGYF2	GIGYF2	chr2:233562014-233725289	siKLF5	siNT	6.67302	10.4152	0.642279	3.86904	5e-05	0.000141705	yes
OAS3	OAS3	OAS3	chr12:113376248-113411054	siKLF5	siNT	13.7133	21.3974	0.641857	3.96466	5e-05	0.000141705	yes
HNRNPUL2-BSCL2	HNRNPUL2-BSCL2	HNRNPUL2-BSCL2	chr11:62457733-62494857	siKLF5	siNT	12.5231	19.5302	0.641117	2.4883	5e-05	0.000141705	yes
ORC1	ORC1	ORC1	chr1:52838500-52870143	siKLF5	siNT	4.32049	6.73731	0.640976	3.40861	5e-05	0.000141705	yes
NOP14	NOP14	NOP14	chr4:2937277-2965118	siKLF5	siNT	20.8413	32.4968	0.640854	3.82724	5e-05	0.000141705	yes
ASNS	ASNS	ASNS	chr7:97481428-97501854	siKLF5	siNT	60.5362	94.3486	0.640202	3.97723	5e-05	0.000141705	yes
GTF2F1	GTF2F1	GTF2F1	chr19:6379579-6393291	siKLF5	siNT	24.1586	37.6511	0.640154	3.88495	5e-05	0.000141705	yes
DNAJC2	DNAJC2	DNAJC2	chr7:102937872-102985320	siKLF5	siNT	16.0251	24.9609	0.639336	2.20795	0.00025	0.000640006	yes
CARD10	CARD10	CARD10	chr22:37886399-37915210	siKLF5	siNT	8.05218	12.5399	0.639073	3.71924	5e-05	0.000141705	yes
RAB3D	RAB3D	RAB3D	chr19:11406823-11450344	siKLF5	siNT	13.2051	20.5608	0.638803	3.86866	5e-05	0.000141705	yes
RBM19	RBM19	RBM19	chr12:114254542-114404176	siKLF5	siNT	3.94007	6.13453	0.638733	3.37573	5e-05	0.000141705	yes
AP3B1	AP3B1	AP3B1	chr5:77298149-77590579	siKLF5	siNT	10.6964	16.651	0.638486	3.80405	5e-05	0.000141705	yes
ODC1	ODC1	ODC1	chr2:10580507-10588453	siKLF5	siNT	103.998	161.875	0.638326	3.98162	5e-05	0.000141705	yes
MX2	MX2	MX2	chr21:42733949-42780869	siKLF5	siNT	3.11385	4.84599	0.63809	3.14131	5e-05	0.000141705	yes
DDX54	DDX54	DDX54	chr12:113587662-113623284	siKLF5	siNT	19.8798	30.9383	0.63809	3.92025	5e-05	0.000141705	yes
PHKA1	PHKA1	PHKA1	chrX:71798663-71934029	siKLF5	siNT	5.58132	8.68085	0.63723	3.75786	5e-05	0.000141705	yes
MCM4	MCM4	MCM4	chr8:48872762-48890719	siKLF5	siNT	56.0788	87.2113	0.63706	3.98019	5e-05	0.000141705	yes
KIAA1967	KIAA1967	KIAA1967	chr8:22462144-22526661	siKLF5	siNT	28.1986	43.8513	0.636996	3.64222	5e-05	0.000141705	yes
EPN3	EPN3	EPN3	chr17:48610047-48621111	siKLF5	siNT	28.4199	44.1641	0.635975	3.93698	5e-05	0.000141705	yes
SH2D4A	SH2D4A	SH2D4A	chr8:19171080-19253729	siKLF5	siNT	21.9016	34.0155	0.635155	3.87856	5e-05	0.000141705	yes
FNBP1L	FNBP1L	FNBP1L	chr1:93913687-94020218	siKLF5	siNT	16.3905	25.4477	0.634677	3.84846	5e-05	0.000141705	yes
SHROOM1	SHROOM1	SHROOM1	chr5:132157832-132166590	siKLF5	siNT	1.71116	2.65623	0.634404	2.84895	5e-05	0.000141705	yes
CXCL16	CXCL16	CXCL16	chr17:4634722-4643223	siKLF5	siNT	22.5346	34.9801	0.634393	3.2477	5e-05	0.000141705	yes
CBX1	CBX1	CBX1	chr17:46147413-46178883	siKLF5	siNT	30.9212	47.9582	0.633182	3.86349	5e-05	0.000141705	yes
HNF1A	HNF1A	HNF1A	chr12:121416548-121440314	siKLF5	siNT	8.0407	12.4704	0.633119	3.62708	5e-05	0.000141705	yes
MBNL3	MBNL3	MBNL3	chrX:131503342-131623996	siKLF5	siNT	5.52031	8.56033	0.632918	3.88746	5e-05	0.000141705	yes
KIF3A	KIF3A	KIF3A	chr5:132028322-132073265	siKLF5	siNT	1.37012	2.12442	0.632772	3.09184	5e-05	0.000141705	yes
TRIM31	TRIM31	TRIM31	chr6_ssto_hap7:1401126-1411311	siKLF5	siNT	1.95976	3.03861	0.632736	2.58713	5e-05	0.000141705	yes
MYO1C	MYO1C	MYO1C	chr17:1367479-1396001	siKLF5	siNT	49.633	76.9519	0.632658	3.95481	5e-05	0.000141705	yes
PPP6R1	PPP6R1	PPP6R1	chr19:55741146-55770038	siKLF5	siNT	46.3039	71.7726	0.632301	3.94466	5e-05	0.000141705	yes
SEPT9	SEPT9	SEPT9	chr17:75277491-75496678	siKLF5	siNT	128.943	199.855	0.632216	3.87299	5e-05	0.000141705	yes
ASIC1	ASIC1	ASIC1	chr12:50451419-50477405	siKLF5	siNT	2.90624	4.5043	0.632148	3.23606	5e-05	0.000141705	yes
WASF2	WASF2	WASF2	chr1:27730733-27816678	siKLF5	siNT	15.3933	23.8568	0.6321	3.88597	5e-05	0.000141705	yes
CTTN	CTTN	CTTN	chr11:70244611-70282690	siKLF5	siNT	156.723	242.728	0.631124	3.83327	5e-05	0.000141705	yes
RASAL1	RASAL1	RASAL1	chr12:113536623-113574044	siKLF5	siNT	2.90339	4.49583	0.630848	3.20196	5e-05	0.000141705	yes
ABHD2	ABHD2	ABHD2	chr15:89631380-89745591	siKLF5	siNT	23.0068	35.6082	0.63015	3.93792	5e-05	0.000141705	yes
PSMD1	PSMD1	PSMD1	chr2:231921577-232037540	siKLF5	siNT	33.1761	51.3323	0.629723	3.90113	5e-05	0.000141705	yes
RBM14	RBM14	RBM14	chr11:66384052-66445275	siKLF5	siNT	11.4181	17.6649	0.629561	1.97773	0.00075	0.00178152	yes
ATAD5	ATAD5	ATAD5	chr17:29159022-29222295	siKLF5	siNT	1.93306	2.99028	0.629396	3.27824	5e-05	0.000141705	yes
MDK	MDK	MDK	chr11:46402333-46405387	siKLF5	siNT	347.531	537.535	0.629218	3.90687	5e-05	0.000141705	yes
ZNF414	ZNF414	ZNF414	chr19:8575461-8579048	siKLF5	siNT	4.3662	6.75229	0.628997	2.777	5e-05	0.000141705	yes
CORO7	CORO7	CORO7	chr16:4390251-4466962	siKLF5	siNT	5.10472	7.89343	0.628821	2.34916	0.0002	0.000520576	yes
CNDP2	CNDP2	CNDP2	chr18:72163499-72190689	siKLF5	siNT	6.54748	10.1186	0.628	3.67236	5e-05	0.000141705	yes
RCC2	RCC2	RCC2	chr1:17733250-17766250	siKLF5	siNT	44.2969	68.4267	0.627355	3.91133	5e-05	0.000141705	yes
NHS	NHS	NHS	chrX:17393542-17754113	siKLF5	siNT	1.38342	2.13668	0.627127	3.22139	5e-05	0.000141705	yes
PHLDA2	PHLDA2	PHLDA2	chr11:2949502-2950650	siKLF5	siNT	49.0882	75.7978	0.626778	3.69688	5e-05	0.000141705	yes
WDR4	WDR4	WDR4	chr21:44263189-44299699	siKLF5	siNT	7.84452	12.1099	0.626424	3.2026	5e-05	0.000141705	yes
TFCP2	TFCP2	TFCP2	chr12:51487538-51566926	siKLF5	siNT	8.14962	12.5807	0.626407	3.62857	5e-05	0.000141705	yes
AZI1	AZI1	AZI1	chr17:79163392-79196751	siKLF5	siNT	6.2494	9.64652	0.626291	3.52389	5e-05	0.000141705	yes
KIAA1522	KIAA1522	KIAA1522	chr1:33207511-33240571	siKLF5	siNT	24.1707	37.3014	0.625971	3.89255	5e-05	0.000141705	yes
HYOU1	HYOU1	HYOU1	chr11:118914895-118927925	siKLF5	siNT	64.6043	99.6962	0.625907	3.90119	5e-05	0.000141705	yes
SP1	SP1	SP1	chr12:53773978-53810226	siKLF5	siNT	9.37409	14.4539	0.624709	3.82796	5e-05	0.000141705	yes
LIMS1	LIMS1	LIMS1	chr2:109150810-109303702	siKLF5	siNT	10.629	16.3827	0.624166	3.73346	5e-05	0.000141705	yes
PPIL4	PPIL4	PPIL4	chr6:149825630-149867238	siKLF5	siNT	7.78399	11.996	0.62397	3.45225	5e-05	0.000141705	yes
SART3	SART3	SART3	chr12:108915990-108955165	siKLF5	siNT	9.0967	14.0177	0.623832	3.70103	5e-05	0.000141705	yes
CDT1	CDT1	CDT1	chr16:88870185-88875666	siKLF5	siNT	13.6356	21.0073	0.623509	3.66793	5e-05	0.000141705	yes
MAP3K5	MAP3K5	MAP3K5	chr6:136878186-137113656	siKLF5	siNT	2.82556	4.35308	0.623501	3.34377	5e-05	0.000141705	yes
VIL1	VIL1	VIL1	chr2:219283837-219314248	siKLF5	siNT	62.8318	96.7898	0.62336	3.88963	5e-05	0.000141705	yes
FOXK1	FOXK1	FOXK1	chr7:4721929-4811074	siKLF5	siNT	5.25787	8.09827	0.623137	3.78684	5e-05	0.000141705	yes
KLF10	KLF10	KLF10	chr8:103661004-103667983	siKLF5	siNT	16.4497	25.3359	0.623128	3.7477	5e-05	0.000141705	yes
DHX37	DHX37	DHX37	chr12:125431369-125473667	siKLF5	siNT	6.07288	9.34865	0.622378	3.58828	5e-05	0.000141705	yes
WARS	WARS	WARS	chr14:100800124-100842680	siKLF5	siNT	23.4227	36.0546	0.622279	3.73066	5e-05	0.000141705	yes
HECA	HECA	HECA	chr6:139456248-139501946	siKLF5	siNT	1.70719	2.62581	0.621136	3.09868	5e-05	0.000141705	yes
BRPF1	BRPF1	BRPF1	chr3:9773433-9789699	siKLF5	siNT	2.97489	4.57496	0.620924	3.30589	5e-05	0.000141705	yes
TUBGCP4	TUBGCP4	TUBGCP4	chr15:43663312-43910998	siKLF5	siNT	10.7506	16.5291	0.620593	1.85996	0.00115	0.00263191	yes
LMNB1	LMNB1	LMNB1	chr5:126112314-126172712	siKLF5	siNT	35.426	54.4611	0.620417	3.66793	5e-05	0.000141705	yes
PJA1	PJA1	PJA1	chrX:68380580-68385365	siKLF5	siNT	7.96111	12.2361	0.620099	3.43114	5e-05	0.000141705	yes
PFAS	PFAS	PFAS	chr17:8152595-8173809	siKLF5	siNT	3.02254	4.64515	0.619965	3.37103	5e-05	0.000141705	yes
PSMG1	PSMG1	PSMG1	chr21:40547371-40555440	siKLF5	siNT	34.6023	53.1749	0.619877	3.63917	5e-05	0.000141705	yes
SPATA5	SPATA5	SPATA5	chr4:123844224-124240604	siKLF5	siNT	2.24529	3.4492	0.619362	3.41416	5e-05	0.000141705	yes
FBXL18	FBXL18	FBXL18	chr7:5515427-5553399	siKLF5	siNT	2.60407	3.99974	0.619139	3.48206	5e-05	0.000141705	yes
UCK2	UCK2	UCK2	chr1:165796731-165880855	siKLF5	siNT	27.234	41.8213	0.61883	3.85262	5e-05	0.000141705	yes
LOC646762	LOC646762	LOC646762	chr7:29685537-29727859	siKLF5	siNT	1.4971	2.29887	0.61875	2.97484	5e-05	0.000141705	yes
GLG1	GLG1	GLG1	chr16:74481325-74641042	siKLF5	siNT	16.4941	25.3184	0.618241	3.85358	5e-05	0.000141705	yes
ELF3	ELF3	ELF3	chr1:201979689-201986315	siKLF5	siNT	72.4035	111.071	0.617349	3.87486	5e-05	0.000141705	yes
TOP1MT	TOP1MT	TOP1MT	chr8:144391496-144442147	siKLF5	siNT	14.9333	22.8972	0.61664	3.54778	5e-05	0.000141705	yes
SDCBP	SDCBP	SDCBP	chr8:59465727-59495419	siKLF5	siNT	146.641	224.822	0.616492	3.8679	5e-05	0.000141705	yes
CASZ1	CASZ1	CASZ1	chr1:10696665-10856733	siKLF5	siNT	4.75355	7.28775	0.616467	3.3468	5e-05	0.000141705	yes
CRTC3	CRTC3	CRTC3	chr15:91073117-91188577	siKLF5	siNT	1.12163	1.71956	0.616436	2.78728	5e-05	0.000141705	yes
PRPF19	PRPF19	PRPF19	chr11:60658019-60674061	siKLF5	siNT	39.1611	60.0303	0.61627	3.79984	5e-05	0.000141705	yes
DAZAP1	DAZAP1	DAZAP1	chr19:1407583-1435682	siKLF5	siNT	67.0848	102.818	0.61604	3.84869	5e-05	0.000141705	yes
NUP62	NUP62	NUP62	chr19:50392912-50437193	siKLF5	siNT	36.064	55.2679	0.615881	3.57735	5e-05	0.000141705	yes
LEO1	LEO1	LEO1	chr15:52230221-52263958	siKLF5	siNT	29.0022	44.4386	0.615652	3.73588	5e-05	0.000141705	yes
SLC27A4	SLC27A4	SLC27A4	chr9:131102838-131123749	siKLF5	siNT	27.4094	41.9824	0.615114	3.78722	5e-05	0.000141705	yes
PES1	PES1	PES1	chr22:30972611-31003000	siKLF5	siNT	44.4957	68.1411	0.614859	3.78778	5e-05	0.000141705	yes
CREBBP	CREBBP	CREBBP	chr16:3775055-3930121	siKLF5	siNT	5.39377	8.2571	0.614341	3.73686	5e-05	0.000141705	yes
SPTBN2	SPTBN2	SPTBN2	chr11:66452719-66488870	siKLF5	siNT	11.9459	18.286	0.614224	3.7972	5e-05	0.000141705	yes
UBE2E2	UBE2E2	UBE2E2	chr3:23244783-23648882	siKLF5	siNT	7.26348	11.11	0.613126	3.16756	5e-05	0.000141705	yes
TFIP11	TFIP11	TFIP11	chr22:26879849-26908437	siKLF5	siNT	9.95916	15.2316	0.612975	3.04437	5e-05	0.000141705	yes
HSPA9	HSPA9	HSPA9	chr5:137890570-137911318	siKLF5	siNT	88.4006	135.192	0.612883	3.81624	5e-05	0.000141705	yes
TUBB4B	TUBB4B	TUBB4B	chr9:140135710-140142222	siKLF5	siNT	607.065	928.346	0.612811	3.69936	5e-05	0.000141705	yes
MSH6	MSH6	MSH6	chr2:48010220-48132932	siKLF5	siNT	21.1343	32.2983	0.611873	3.12765	5e-05	0.000141705	yes
ICMT	ICMT	ICMT	chr1:6266188-6296044	siKLF5	siNT	22.6018	34.5366	0.611692	3.77554	5e-05	0.000141705	yes
VPRBP	VPRBP	VPRBP	chr3:51428698-51534018	siKLF5	siNT	4.97372	7.59925	0.611533	2.20781	0.00025	0.000640006	yes
PLA2G10	PLA2G10	PLA2G10	chr16:14766404-14788526	siKLF5	siNT	2.89825	4.42806	0.611494	2.16235	0.0001	0.000273198	yes
ZNRF3	ZNRF3	ZNRF3	chr22:29279754-29453476	siKLF5	siNT	4.41711	6.7482	0.611399	3.55291	5e-05	0.000141705	yes
APAF1	APAF1	APAF1	chr12:99039077-100378432	siKLF5	siNT	3.01673	4.60842	0.611285	3.42943	5e-05	0.000141705	yes
PFKM	PFKM	PFKM	chr12:48436680-48540187	siKLF5	siNT	9.57022	14.6168	0.611004	2.69037	5e-05	0.000141705	yes
HNRNPUL2	HNRNPUL2	HNRNPUL2	chr11:62457733-62494857	siKLF5	siNT	9.11361	13.9159	0.610637	2.21786	0.0001	0.000273198	yes
FBRSL1	FBRSL1	FBRSL1	chr12:133067156-133161773	siKLF5	siNT	6.24772	9.53818	0.610385	3.5251	5e-05	0.000141705	yes
IRX2	IRX2	IRX2	chr5:2746278-2751769	siKLF5	siNT	14.1399	21.5778	0.609774	3.51406	5e-05	0.000141705	yes
RANGAP1	RANGAP1	RANGAP1	chr22:41641614-41682216	siKLF5	siNT	87.9544	134.19	0.609447	3.80244	5e-05	0.000141705	yes
SF3B2	SF3B2	SF3B2	chr11:65819815-65836382	siKLF5	siNT	58.3448	88.9927	0.609083	3.79912	5e-05	0.000141705	yes
EHD4	EHD4	EHD4	chr15:42191638-42264755	siKLF5	siNT	20.9998	32.0259	0.608863	3.6979	5e-05	0.000141705	yes
SSH3	SSH3	SSH3	chr11:67070918-67080078	siKLF5	siNT	25.58	39.0039	0.608602	3.72334	5e-05	0.000141705	yes
SLC35F2	SLC35F2	SLC35F2	chr11:107661716-107729914	siKLF5	siNT	19.286	29.4055	0.608534	3.69722	5e-05	0.000141705	yes
DHX16	DHX16	DHX16	chr6_ssto_hap7:1947095-1973134	siKLF5	siNT	8.34959	12.7304	0.608496	2.98967	5e-05	0.000141705	yes
BMP4	BMP4	BMP4	chr14:54416454-54423554	siKLF5	siNT	61.2077	93.3147	0.60839	3.74944	5e-05	0.000141705	yes
EZR	EZR	EZR	chr6:159186772-159240456	siKLF5	siNT	74.6168	113.757	0.608388	3.79722	5e-05	0.000141705	yes
TONSL	TONSL	TONSL	chr8:145654162-145669812	siKLF5	siNT	9.8546	15.0212	0.608135	3.6221	5e-05	0.000141705	yes
NARS	NARS	NARS	chr18:55267893-55289177	siKLF5	siNT	34.1958	52.1145	0.607867	3.75668	5e-05	0.000141705	yes
FAM91A1	FAM91A1	FAM91A1	chr8:124780881-124827690	siKLF5	siNT	17.1067	26.0697	0.607812	3.75277	5e-05	0.000141705	yes
MYADM	MYADM	MYADM	chr19:54369610-54379689	siKLF5	siNT	62.6941	95.5417	0.607799	3.8022	5e-05	0.000141705	yes
RAPGEF2	RAPGEF2	RAPGEF2	chr4:160188997-160281301	siKLF5	siNT	2.71745	4.14027	0.607474	3.36321	5e-05	0.000141705	yes
IL8	IL8	IL8	chr4:74606222-74609433	siKLF5	siNT	3.35128	5.10506	0.607216	2.69973	5e-05	0.000141705	yes
KPNA6	KPNA6	KPNA6	chr1:32573643-32642168	siKLF5	siNT	8.40641	12.8044	0.607082	3.6984	5e-05	0.000141705	yes
AJUBA	AJUBA	AJUBA	chr14:23440409-23451848	siKLF5	siNT	13.0548	19.8841	0.607036	3.67556	5e-05	0.000141705	yes
DSG2	DSG2	DSG2	chr18:29078026-29136874	siKLF5	siNT	98.8476	150.547	0.606936	3.73237	5e-05	0.000141705	yes
LOC100287314	LOC100287314	LOC100287314	chr12:30948614-30955645	siKLF5	siNT	5.03442	7.66699	0.606834	2.9736	5e-05	0.000141705	yes
TDP1	TDP1	TDP1	chr14:90422245-90511108	siKLF5	siNT	5.43766	8.27948	0.606555	3.36094	5e-05	0.000141705	yes
CEP164	CEP164	CEP164	chr11:117192493-117283982	siKLF5	siNT	1.97351	3.0037	0.605977	3.10931	5e-05	0.000141705	yes
TUBB3	TUBB3	TUBB3	chr16:89988416-90002505	siKLF5	siNT	6.79039	10.3341	0.605853	3.10869	5e-05	0.000141705	yes
ARHGAP39	ARHGAP39	ARHGAP39	chr8:145754562-145838888	siKLF5	siNT	3.07701	4.68255	0.605766	3.27967	5e-05	0.000141705	yes
ZNHIT6	ZNHIT6	ZNHIT6	chr1:86115105-86174116	siKLF5	siNT	2.88444	4.38818	0.605333	3.34131	5e-05	0.000141705	yes
PTGES2	PTGES2	PTGES2	chr9:130882971-130890741	siKLF5	siNT	55.1218	83.8538	0.605252	3.54602	5e-05	0.000141705	yes
AGAP3	AGAP3	AGAP3	chr7:150783825-150841523	siKLF5	siNT	13.4049	20.3875	0.604923	3.39787	5e-05	0.000141705	yes
KPNB1	KPNB1	KPNB1	chr17:45727203-45761004	siKLF5	siNT	69.6273	105.853	0.604342	3.80122	5e-05	0.000141705	yes
RAD54L	RAD54L	RAD54L	chr1:46713366-46769038	siKLF5	siNT	4.14581	6.30152	0.604044	1.90908	0.00095	0.00220834	yes
ZNF787	ZNF787	ZNF787	chr19:56598731-56632649	siKLF5	siNT	27.8121	42.2735	0.604041	3.6319	5e-05	0.000141705	yes
GMDS	GMDS	GMDS	chr6:1624034-2245868	siKLF5	siNT	114.695	174.332	0.604041	3.76017	5e-05	0.000141705	yes
FAM98A	FAM98A	FAM98A	chr2:33808728-33824362	siKLF5	siNT	19.9537	30.3275	0.603967	3.64701	5e-05	0.000141705	yes
UBA1	UBA1	UBA1	chrX:47050198-47074527	siKLF5	siNT	51.126	77.7011	0.603878	3.75816	5e-05	0.000141705	yes
OVOL2	OVOL2	OVOL2	chr20:18004795-18038521	siKLF5	siNT	12.5662	19.0801	0.602515	3.30727	5e-05	0.000141705	yes
BLVRA	BLVRA	BLVRA	chr7:43798271-43846941	siKLF5	siNT	2.2708	3.44716	0.602211	1.9929	0.00095	0.00220834	yes
SERTAD4	SERTAD4	SERTAD4	chr1:210404803-210416440	siKLF5	siNT	4.69811	7.13173	0.602172	2.74405	5e-05	0.000141705	yes
NOTCH1	NOTCH1	NOTCH1	chr9:139388895-139440238	siKLF5	siNT	7.83582	11.8934	0.602003	3.68991	5e-05	0.000141705	yes
PYGB	PYGB	PYGB	chr20:25228705-25371618	siKLF5	siNT	28.0035	42.5006	0.601873	3.04454	5e-05	0.000141705	yes
STK38	STK38	STK38	chr6:36461668-36515247	siKLF5	siNT	11.0194	16.717	0.601274	3.56566	5e-05	0.000141705	yes
PSME3	PSME3	PSME3	chr17:40985158-40995777	siKLF5	siNT	58.8979	89.302	0.600478	3.74525	5e-05	0.000141705	yes
PITPNA	PITPNA	PITPNA	chr17:1420212-1466110	siKLF5	siNT	28.8551	43.7458	0.600319	3.5678	5e-05	0.000141705	yes
STAT3	STAT3	STAT3	chr17:40465342-40540513	siKLF5	siNT	22.7285	34.4573	0.600305	3.7235	5e-05	0.000141705	yes
TPR	TPR	TPR	chr1:185703682-186446655	siKLF5	siNT	14.2072	21.5247	0.59937	2.9712	5e-05	0.000141705	yes
UBTF	UBTF	UBTF	chr17:42282400-42298994	siKLF5	siNT	13.3853	20.2776	0.599244	3.6323	5e-05	0.000141705	yes
ACD	ACD	ACD	chr16:67679029-67694718	siKLF5	siNT	6.42055	9.724	0.598852	3.02214	5e-05	0.000141705	yes
OSBPL10	OSBPL10	OSBPL10	chr3:31702316-32033228	siKLF5	siNT	16.437	24.891	0.598672	3.47414	5e-05	0.000141705	yes
RBM10	RBM10	RBM10	chrX:47004616-47046214	siKLF5	siNT	15.4378	23.3769	0.59861	3.58325	5e-05	0.000141705	yes
MAFG	MAFG	MAFG	chr17:79876144-79885587	siKLF5	siNT	11.7585	17.8037	0.598466	3.61474	5e-05	0.000141705	yes
IGSF3	IGSF3	IGSF3	chr1:117117030-117210314	siKLF5	siNT	4.55659	6.89621	0.597847	3.49656	5e-05	0.000141705	yes
HMGB3	HMGB3	HMGB3	chrX:150151762-150159248	siKLF5	siNT	29.1128	44.0411	0.597198	3.69417	5e-05	0.000141705	yes
STK11IP	STK11IP	STK11IP	chr2:220462595-220481173	siKLF5	siNT	1.37531	2.08052	0.597185	2.64969	5e-05	0.000141705	yes
ENDOD1	ENDOD1	ENDOD1	chr11:94822973-94865815	siKLF5	siNT	12.7114	19.2236	0.596754	3.62645	5e-05	0.000141705	yes
ACIN1	ACIN1	ACIN1	chr14:23527773-23569665	siKLF5	siNT	20.4894	30.9833	0.596617	2.22849	0.00025	0.000640006	yes
FTSJ3	FTSJ3	FTSJ3	chr17:61896792-61909387	siKLF5	siNT	20.7939	31.4387	0.596387	2.49341	5e-05	0.000141705	yes
HELB	HELB	HELB	chr12:66696334-66737423	siKLF5	siNT	0.861654	1.30232	0.595908	2.31033	5e-05	0.000141705	yes
TSPYL2	TSPYL2	TSPYL2	chrX:53111541-53117728	siKLF5	siNT	2.24421	3.39179	0.59584	2.71425	5e-05	0.000141705	yes
SMPD4	SMPD4	SMPD4	chr2:130908964-130948300	siKLF5	siNT	15.9042	24.014	0.594472	2.3508	5e-05	0.000141705	yes
NUP188	NUP188	NUP188	chr9:131707808-131769375	siKLF5	siNT	19.8631	29.9843	0.594118	3.29062	5e-05	0.000141705	yes
TERF2	TERF2	TERF2	chr16:69389463-69419891	siKLF5	siNT	7.08516	10.6942	0.593954	3.32254	5e-05	0.000141705	yes
CCDC64B	CCDC64B	CCDC64B	chr16:3077867-3089133	siKLF5	siNT	4.35504	6.57003	0.593214	2.7634	5e-05	0.000141705	yes
SNRK	SNRK	SNRK	chr3:43328003-43393454	siKLF5	siNT	2.03903	3.0751	0.592748	2.92347	5e-05	0.000141705	yes
GTPBP4	GTPBP4	GTPBP4	chr10:1034348-1063708	siKLF5	siNT	46.7067	70.4145	0.592245	3.67175	5e-05	0.000141705	yes
MMP14	MMP14	MMP14	chr14:23305792-23316803	siKLF5	siNT	5.01699	7.55936	0.591442	3.24392	5e-05	0.000141705	yes
SCAF4	SCAF4	SCAF4	chr21:33043312-33104431	siKLF5	siNT	12.0714	18.187	0.591312	3.56493	5e-05	0.000141705	yes
FKBP4	FKBP4	FKBP4	chr12:2904107-2914587	siKLF5	siNT	55.3081	83.3252	0.591263	3.6932	5e-05	0.000141705	yes
PTPN23	PTPN23	PTPN23	chr3:47422490-47454931	siKLF5	siNT	7.26151	10.9394	0.591199	3.49872	5e-05	0.000141705	yes
MNT	MNT	MNT	chr17:2287353-2304258	siKLF5	siNT	3.57954	5.38982	0.59046	3.23495	5e-05	0.000141705	yes
WWC3	WWC3	WWC3	chrX:9983794-10112518	siKLF5	siNT	3.60249	5.42381	0.590311	3.35046	5e-05	0.000141705	yes
RAB11FIP4	RAB11FIP4	RAB11FIP4	chr17:29718641-29865232	siKLF5	siNT	7.23246	10.8851	0.589797	3.59216	5e-05	0.000141705	yes
NCAPH	NCAPH	NCAPH	chr2:97001483-97041274	siKLF5	siNT	7.79009	11.7243	0.589785	3.46905	5e-05	0.000141705	yes
IER5	IER5	IER5	chr1:181057637-181059979	siKLF5	siNT	10.8693	16.3554	0.589502	3.35226	5e-05	0.000141705	yes
CDC37	CDC37	CDC37	chr19:10501808-10514271	siKLF5	siNT	63.0977	94.9184	0.5891	3.63683	5e-05	0.000141705	yes
ADRA2A	ADRA2A	ADRA2A	chr10:112836789-112840662	siKLF5	siNT	0.683062	1.02726	0.58871	2.15375	0.0003	0.000760714	yes
AKAP11	AKAP11	AKAP11	chr13:42846288-42897403	siKLF5	siNT	8.06438	12.1262	0.588498	3.61946	5e-05	0.000141705	yes
HES7	HES7	HES7	chr17:8023907-8027410	siKLF5	siNT	0.777579	1.16921	0.588475	1.51814	0.0085	0.0160995	yes
HOXC12	HOXC12	HOXC12	chr12:54348713-54350350	siKLF5	siNT	4.21302	6.33455	0.588387	2.22155	0.00025	0.000640006	yes
AGL	AGL	AGL	chr1:100315639-100389579	siKLF5	siNT	3.19003	4.7947	0.58787	3.35475	5e-05	0.000141705	yes
TBC1D1	TBC1D1	TBC1D1	chr4:37892704-38140796	siKLF5	siNT	1.4701	2.20933	0.587696	2.80949	5e-05	0.000141705	yes
GPR110	GPR110	GPR110	chr6:46967812-47010082	siKLF5	siNT	20.7725	31.217	0.587655	3.50827	5e-05	0.000141705	yes
MYO5C	MYO5C	MYO5C	chr15:52484514-52587995	siKLF5	siNT	9.05164	13.6001	0.587368	3.57869	5e-05	0.000141705	yes
ITPR3	ITPR3	ITPR3	chr6:33589155-33664348	siKLF5	siNT	21.0538	31.6328	0.587338	3.66759	5e-05	0.000141705	yes
TBX3	TBX3	TBX3	chr12:115108058-115121969	siKLF5	siNT	22.1975	33.3464	0.587134	3.62469	5e-05	0.000141705	yes
PLEKHA7	PLEKHA7	PLEKHA7	chr11:16809206-17035963	siKLF5	siNT	10.0194	15.0433	0.586324	3.52107	5e-05	0.000141705	yes
KIAA0513	KIAA0513	KIAA0513	chr16:85061409-85127828	siKLF5	siNT	3.95951	5.94437	0.586202	3.39863	5e-05	0.000141705	yes
HSP90AA1	HSP90AA1	HSP90AA1	chr14:102547074-102606086	siKLF5	siNT	281.204	422.083	0.58591	3.53251	5e-05	0.000141705	yes
NOLC1	NOLC1	NOLC1	chr10:103911932-103923627	siKLF5	siNT	33.9967	51.0239	0.58578	3.64548	5e-05	0.000141705	yes
TCF20	TCF20	TCF20	chr22:42556018-42611445	siKLF5	siNT	8.00449	12.012	0.585591	3.56042	5e-05	0.000141705	yes
SLAMF7	SLAMF7	SLAMF7	chr1:160709076-160724601	siKLF5	siNT	1.08534	1.62835	0.585266	2.18968	0.0003	0.000760714	yes
CDC42EP1	CDC42EP1	CDC42EP1	chr22:37956470-37965410	siKLF5	siNT	66.5381	99.8105	0.585011	3.63911	5e-05	0.000141705	yes
CDK12	CDK12	CDK12	chr17:37617738-37690800	siKLF5	siNT	5.51165	8.26579	0.584667	3.5051	5e-05	0.000141705	yes
GPR114	GPR114	GPR114	chr16:57576600-57611100	siKLF5	siNT	3.04763	4.57017	0.584562	2.98993	5e-05	0.000141705	yes
MAP3K10	MAP3K10	MAP3K10	chr19:40697650-40721482	siKLF5	siNT	1.46663	2.19932	0.584549	2.5916	5e-05	0.000141705	yes
ILF3	ILF3	ILF3	chr19:10764936-10803095	siKLF5	siNT	42.3731	63.5389	0.584492	3.50356	5e-05	0.000141705	yes
MYO5B	MYO5B	MYO5B	chr18:47349155-47721451	siKLF5	siNT	5.46533	8.19397	0.584253	3.52937	5e-05	0.000141705	yes
FAM114A1	FAM114A1	FAM114A1	chr4:38869353-38947365	siKLF5	siNT	4.6506	6.96959	0.583657	3.1897	5e-05	0.000141705	yes
WDR36	WDR36	WDR36	chr5:110427869-110466200	siKLF5	siNT	5.43393	8.14089	0.583191	3.43812	5e-05	0.000141705	yes
AP3D1	AP3D1	AP3D1	chr19:2100986-2151556	siKLF5	siNT	30.8619	46.2349	0.583157	3.62608	5e-05	0.000141705	yes
ZNF589	ZNF589	ZNF589	chr3:48282595-48312479	siKLF5	siNT	0.798188	1.1956	0.58293	2.14268	0.0004	0.000994575	yes
MEF2D	MEF2D	MEF2D	chr1:156433512-156470634	siKLF5	siNT	4.04998	6.0659	0.582808	3.3093	5e-05	0.000141705	yes
KIF2A	KIF2A	KIF2A	chr5:61601988-61683011	siKLF5	siNT	4.59575	6.88333	0.582807	3.21171	5e-05	0.000141705	yes
TOP2B	TOP2B	TOP2B	chr3:25469753-25705863	siKLF5	siNT	17.0026	25.4658	0.582805	3.57874	5e-05	0.000141705	yes
EXOSC10	EXOSC10	EXOSC10	chr1:11126675-11159938	siKLF5	siNT	17.6547	26.4416	0.582757	3.51442	5e-05	0.000141705	yes
ANKS6	ANKS6	ANKS6	chr9:101494290-101558794	siKLF5	siNT	10.6655	15.9727	0.582659	3.57688	5e-05	0.000141705	yes
KBTBD11	KBTBD11	KBTBD11	chr8:1922043-1955109	siKLF5	siNT	1.71798	2.57159	0.581953	3.0023	5e-05	0.000141705	yes
IFT81	IFT81	IFT81	chr12:110562139-110656600	siKLF5	siNT	2.46958	3.69648	0.581886	2.64818	5e-05	0.000141705	yes
WDHD1	WDHD1	WDHD1	chr14:55405655-55493819	siKLF5	siNT	4.22932	6.33046	0.581886	3.32768	5e-05	0.000141705	yes
DOK4	DOK4	DOK4	chr16:57496550-57520385	siKLF5	siNT	10.232	15.3138	0.581743	1.98526	0.001	0.00231362	yes
RBM42	RBM42	RBM42	chr19:36119979-36128587	siKLF5	siNT	62.3139	93.2622	0.581738	3.58969	5e-05	0.000141705	yes
TOP1	TOP1	TOP1	chr20:39657461-39753126	siKLF5	siNT	37.7408	56.4633	0.58119	3.61319	5e-05	0.000141705	yes
MLLT4	MLLT4	MLLT4	chr6:168227670-168372700	siKLF5	siNT	19.1453	28.6369	0.580887	3.60454	5e-05	0.000141705	yes
OPTN	OPTN	OPTN	chr10:13142081-13180276	siKLF5	siNT	5.55926	8.31137	0.580192	3.1789	5e-05	0.000141705	yes
DDX42	DDX42	DDX42	chr17:61851566-61896677	siKLF5	siNT	21.8435	32.6567	0.580172	3.57179	5e-05	0.000141705	yes
PNPLA2	PNPLA2	PNPLA2	chr11:818900-825571	siKLF5	siNT	51.3259	76.6988	0.579517	3.59728	5e-05	0.000141705	yes
ZDHHC8P1	ZDHHC8P1	ZDHHC8P1	chr22:23732791-23744799	siKLF5	siNT	4.75493	7.10404	0.579215	2.97669	5e-05	0.000141705	yes
SFN	SFN	SFN	chr1:27189632-27190947	siKLF5	siNT	88.9942	132.928	0.578864	3.57946	5e-05	0.000141705	yes
NUMBL	NUMBL	NUMBL	chr19:41171811-41196556	siKLF5	siNT	3.98503	5.95189	0.578757	3.07163	5e-05	0.000141705	yes
GTF3C2	GTF3C2	GTF3C2	chr2:27548715-27579901	siKLF5	siNT	15.3834	22.9743	0.578644	3.49996	5e-05	0.000141705	yes
CCDC85C	CCDC85C	CCDC85C	chr14:99947738-100070727	siKLF5	siNT	13.6752	20.4177	0.578263	2.67097	5e-05	0.000141705	yes
CNOT1	CNOT1	CNOT1	chr16:58549382-58663790	siKLF5	siNT	26.2371	39.1588	0.57773	3.55252	5e-05	0.000141705	yes
SH3KBP1	SH3KBP1	SH3KBP1	chrX:19552082-19905744	siKLF5	siNT	15.1151	22.5517	0.577238	3.44744	5e-05	0.000141705	yes
DPP9	DPP9	DPP9	chr19:4675243-4723855	siKLF5	siNT	13.3906	19.9755	0.577005	3.49424	5e-05	0.000141705	yes
U2AF1	U2AF1	U2AF1	chr21:44513065-44527688	siKLF5	siNT	157.613	235.093	0.576845	3.58123	5e-05	0.000141705	yes
KIAA0100	KIAA0100	KIAA0100	chr17:26926150-26972177	siKLF5	siNT	39.0664	58.2687	0.576793	3.58732	5e-05	0.000141705	yes
NOC4L	NOC4L	NOC4L	chr12:132628992-132636986	siKLF5	siNT	15.6266	23.3052	0.576645	3.26883	5e-05	0.000141705	yes
TELO2	TELO2	TELO2	chr16:1543351-1662109	siKLF5	siNT	4.30695	6.42314	0.576614	2.53323	5e-05	0.000141705	yes
KHSRP	KHSRP	KHSRP	chr19:6413118-6424822	siKLF5	siNT	41.9234	62.5199	0.57656	3.58346	5e-05	0.000141705	yes
POLRMT	POLRMT	POLRMT	chr19:617222-633568	siKLF5	siNT	13.1224	19.5667	0.576365	3.46371	5e-05	0.000141705	yes
MKI67	MKI67	MKI67	chr10:129894924-129924468	siKLF5	siNT	16.2121	24.1548	0.575245	3.56777	5e-05	0.000141705	yes
SNX18	SNX18	SNX18	chr5:53813588-53842416	siKLF5	siNT	1.74584	2.60062	0.574932	2.81333	5e-05	0.000141705	yes
PSMD11	PSMD11	PSMD11	chr17:30771480-30810337	siKLF5	siNT	19.8093	29.4997	0.574522	3.52184	5e-05	0.000141705	yes
RAB3IL1	RAB3IL1	RAB3IL1	chr11:61664767-61687741	siKLF5	siNT	0.895997	1.3343	0.57452	1.87954	0.00175	0.00385911	yes
HDGF	HDGF	HDGF	chr1:156711898-156722240	siKLF5	siNT	276.051	411.059	0.574413	3.51885	5e-05	0.000141705	yes
CYLD	CYLD	CYLD	chr16:50775960-50835846	siKLF5	siNT	1.09063	1.624	0.574387	2.84887	5e-05	0.000141705	yes
CYP1B1	CYP1B1	CYP1B1	chr2:38294745-38303323	siKLF5	siNT	4.31728	6.42815	0.574282	3.23561	5e-05	0.000141705	yes
OAS1	OAS1	OAS1	chr12:113344738-113357712	siKLF5	siNT	55.8553	83.1623	0.574234	3.52564	5e-05	0.000141705	yes
INCENP	INCENP	INCENP	chr11:61891444-61920635	siKLF5	siNT	16.6253	24.747	0.573875	3.5084	5e-05	0.000141705	yes
RPS6KA1	RPS6KA1	RPS6KA1	chr1:26856248-26901520	siKLF5	siNT	39.3144	58.5006	0.573395	3.56415	5e-05	0.000141705	yes
SSRP1	SSRP1	SSRP1	chr11:57093458-57103351	siKLF5	siNT	63.9888	95.1729	0.572732	3.57146	5e-05	0.000141705	yes
EPS8L2	EPS8L2	EPS8L2	chr11:706119-727727	siKLF5	siNT	32.9708	49.0372	0.572689	3.54274	5e-05	0.000141705	yes
DCLRE1B	DCLRE1B	DCLRE1B	chr1:114447914-114456708	siKLF5	siNT	2.51638	3.74236	0.572597	2.83222	5e-05	0.000141705	yes
XAB2	XAB2	XAB2	chr19:7684410-7694439	siKLF5	siNT	15.3057	22.7578	0.572289	3.38998	5e-05	0.000141705	yes
TIPARP	TIPARP	TIPARP	chr3:156390959-156424557	siKLF5	siNT	12.6374	18.7864	0.571988	3.44372	5e-05	0.000141705	yes
BAG6	BAG6	BAG6	chr6_ssto_hap7:2937601-2956785	siKLF5	siNT	31.8192	47.2996	0.571932	3.52527	5e-05	0.000141705	yes
PHRF1	PHRF1	PHRF1	chr11:576482-612222	siKLF5	siNT	11.5585	17.1808	0.571844	3.48496	5e-05	0.000141705	yes
RELL1	RELL1	RELL1	chr4:37455551-37687999	siKLF5	siNT	7.44464	11.0654	0.571779	1.59749	0.0055	0.0108664	yes
LYN	LYN	LYN	chr8:56792385-56925006	siKLF5	siNT	34.2061	50.8404	0.571723	3.55581	5e-05	0.000141705	yes
NLRP2	NLRP2	NLRP2	chr19:55476651-55512510	siKLF5	siNT	20.9495	31.1367	0.5717	3.51447	5e-05	0.000141705	yes
OGDH	OGDH	OGDH	chr7:44646120-44748669	siKLF5	siNT	36.4421	54.1622	0.57168	3.54939	5e-05	0.000141705	yes
ARF6	ARF6	ARF6	chr14:50359735-50363772	siKLF5	siNT	25.4472	37.8204	0.571657	3.53532	5e-05	0.000141705	yes
LRRC73	LRRC73	LRRC73	chr6:43474702-43478081	siKLF5	siNT	2.97285	4.41673	0.57113	2.49875	5e-05	0.000141705	yes
MESDC1	MESDC1	MESDC1	chr15:81293294-81296345	siKLF5	siNT	8.28224	12.3047	0.571115	3.24308	5e-05	0.000141705	yes
MROH6	MROH6	MROH6	chr8:144648362-144654928	siKLF5	siNT	26.331	39.1139	0.570919	3.51106	5e-05	0.000141705	yes
SCAF1	SCAF1	SCAF1	chr19:50145381-50161906	siKLF5	siNT	15.9834	23.7427	0.570914	3.47488	5e-05	0.000141705	yes
SLC25A25	SLC25A25	SLC25A25	chr9:130830478-130871537	siKLF5	siNT	9.15573	13.6003	0.570888	3.31465	5e-05	0.000141705	yes
MTA2	MTA2	MTA2	chr11:62360674-62369312	siKLF5	siNT	24.2601	36.0308	0.570645	3.49391	5e-05	0.000141705	yes
FKBP9	FKBP9	FKBP9	chr7:32997004-33046543	siKLF5	siNT	29.3647	43.6107	0.570601	3.52833	5e-05	0.000141705	yes
CDC5L	CDC5L	CDC5L	chr6:44355250-44418161	siKLF5	siNT	32.7539	48.6437	0.570584	3.55999	5e-05	0.000141705	yes
ARNT	ARNT	ARNT	chr1:150782180-150849244	siKLF5	siNT	8.9635	13.3092	0.570291	3.405	5e-05	0.000141705	yes
LYAR	LYAR	LYAR	chr4:4269428-4291896	siKLF5	siNT	20.9625	31.1253	0.570279	3.30226	5e-05	0.000141705	yes
NOL9	NOL9	NOL9	chr1:6581406-6614658	siKLF5	siNT	3.33241	4.94628	0.569779	3.21993	5e-05	0.000141705	yes
SLC9A1	SLC9A1	SLC9A1	chr1:27425299-27481621	siKLF5	siNT	17.568	26.0707	0.569484	3.50264	5e-05	0.000141705	yes
BAHCC1	BAHCC1	BAHCC1	chr17:79373539-79433358	siKLF5	siNT	1.78696	2.65091	0.568978	3.13408	5e-05	0.000141705	yes
LDLRAD3	LDLRAD3	LDLRAD3	chr11:35965611-36252841	siKLF5	siNT	1.32059	1.95831	0.568428	2.33672	5e-05	0.000141705	yes
CDC6	CDC6	CDC6	chr17:38444145-38459413	siKLF5	siNT	26.7108	39.585	0.567532	3.48625	5e-05	0.000141705	yes
C17orf96	C17orf96	C17orf96	chr17:36827958-36831187	siKLF5	siNT	1.94559	2.88274	0.567234	2.55177	5e-05	0.000141705	yes
CHERP	CHERP	CHERP	chr19:16607204-16653263	siKLF5	siNT	26.82	39.7283	0.566861	3.43105	5e-05	0.000141705	yes
DYNLL2	DYNLL2	DYNLL2	chr17:56160779-56167618	siKLF5	siNT	42.8019	63.3994	0.566796	3.43857	5e-05	0.000141705	yes
DUS3L	DUS3L	DUS3L	chr19:5785152-5791249	siKLF5	siNT	13.5576	20.0815	0.566769	3.25838	5e-05	0.000141705	yes
PTPN1	PTPN1	PTPN1	chr20:49126890-49201086	siKLF5	siNT	15.9252	23.5881	0.566742	3.41811	5e-05	0.000141705	yes
PFKP	PFKP	PFKP	chr10:3109711-3178997	siKLF5	siNT	62.5964	92.7125	0.566683	3.53167	5e-05	0.000141705	yes
ABCF1	ABCF1	ABCF1	chr6_ssto_hap7:1871447-1891586	siKLF5	siNT	23.5333	34.8543	0.566632	3.49626	5e-05	0.000141705	yes
RNF40	RNF40	RNF40	chr16:30759619-30787628	siKLF5	siNT	12.2275	18.1073	0.566439	3.16344	5e-05	0.000141705	yes
ACLY	ACLY	ACLY	chr17:40023178-40075272	siKLF5	siNT	21.8886	32.4063	0.566095	3.47619	5e-05	0.000141705	yes
MECOM	MECOM	MECOM	chr3:168801286-169381563	siKLF5	siNT	6.20824	9.19135	0.566093	3.27821	5e-05	0.000141705	yes
FRMD3	FRMD3	FRMD3	chr9:85857904-86153348	siKLF5	siNT	17.885	26.4711	0.565666	3.32165	5e-05	0.000141705	yes
TRIM28	TRIM28	TRIM28	chr19:59055835-59062082	siKLF5	siNT	159.686	236.332	0.565575	3.49616	5e-05	0.000141705	yes
CHKA	CHKA	CHKA	chr11:67820325-67888858	siKLF5	siNT	29.0109	42.9331	0.565494	3.43985	5e-05	0.000141705	yes
IKBKAP	IKBKAP	IKBKAP	chr9:111629799-111696608	siKLF5	siNT	9.57129	14.161	0.56514	3.43196	5e-05	0.000141705	yes
SMAD7	SMAD7	SMAD7	chr18:46446222-46477081	siKLF5	siNT	8.414	12.4475	0.564995	3.05938	5e-05	0.000141705	yes
CITED4	CITED4	CITED4	chr1:41326727-41328018	siKLF5	siNT	1.50026	2.21898	0.564686	1.71498	0.0036	0.00741304	yes
NOP2	NOP2	NOP2	chr12:6666035-6677498	siKLF5	siNT	20.9885	31.0433	0.564681	3.40371	5e-05	0.000141705	yes
EFTUD2	EFTUD2	EFTUD2	chr17:42923720-42976993	siKLF5	siNT	49.947	73.8699	0.564589	3.53221	5e-05	0.000141705	yes
BAZ1A	BAZ1A	BAZ1A	chr14:35221936-35344853	siKLF5	siNT	7.25315	10.7264	0.56449	3.35876	5e-05	0.000141705	yes
PLXNA3	PLXNA3	PLXNA3	chrX:153686622-153701985	siKLF5	siNT	2.05818	3.0434	0.564311	2.99971	5e-05	0.000141705	yes
SAMD1	SAMD1	SAMD1	chr19:14199228-14201232	siKLF5	siNT	11.4511	16.9289	0.564011	2.96132	5e-05	0.000141705	yes
LTBP4	LTBP4	LTBP4	chr19:41099071-41135725	siKLF5	siNT	16.1643	23.8924	0.563745	3.47252	5e-05	0.000141705	yes
SMC4	SMC4	SMC4	chr3:160117429-160152741	siKLF5	siNT	36.5411	54.0078	0.563647	3.50777	5e-05	0.000141705	yes
ATP2C2	ATP2C2	ATP2C2	chr16:84402132-84497793	siKLF5	siNT	10.5535	15.5976	0.563604	3.31321	5e-05	0.000141705	yes
RFC1	RFC1	RFC1	chr4:39289068-39368001	siKLF5	siNT	9.60342	14.1906	0.563317	3.37223	5e-05	0.000141705	yes
SEC14L1	SEC14L1	SEC14L1	chr17:75084724-75213181	siKLF5	siNT	9.62567	14.2224	0.563205	3.02048	5e-05	0.000141705	yes
BAIAP2L1	BAIAP2L1	BAIAP2L1	chr7:97910978-98030427	siKLF5	siNT	22.0363	32.552	0.562866	2.07722	0.0006	0.00144989	yes
AEN	AEN	AEN	chr15:89164526-89175512	siKLF5	siNT	10.0699	14.8742	0.562763	3.27184	5e-05	0.000141705	yes
LDLRAP1	LDLRAP1	LDLRAP1	chr1:25870075-25895377	siKLF5	siNT	9.62134	14.211	0.562702	3.23913	5e-05	0.000141705	yes
ARL4C	ARL4C	ARL4C	chr2:235401685-235405693	siKLF5	siNT	9.00013	13.2932	0.562675	3.31314	5e-05	0.000141705	yes
STIP1	STIP1	STIP1	chr11:63953586-63972020	siKLF5	siNT	70.9249	104.742	0.562482	3.50559	5e-05	0.000141705	yes
ESF1	ESF1	ESF1	chr20:13694968-13765579	siKLF5	siNT	6.73745	9.94886	0.562329	3.14637	5e-05	0.000141705	yes
AGPAT2	AGPAT2	AGPAT2	chr9:139567594-139581911	siKLF5	siNT	67.2226	99.2586	0.562247	3.48342	5e-05	0.000141705	yes
PITPNC1	PITPNC1	PITPNC1	chr17:65373396-65693379	siKLF5	siNT	0.787011	1.16183	0.561944	2.41911	5e-05	0.000141705	yes
IQGAP2	IQGAP2	IQGAP2	chr5:75699148-76003957	siKLF5	siNT	8.63095	12.7351	0.561224	3.37339	5e-05	0.000141705	yes
PRPF40A	PRPF40A	PRPF40A	chr2:153508106-153573975	siKLF5	siNT	12.2013	18.0022	0.561141	3.46162	5e-05	0.000141705	yes
PICK1	PICK1	PICK1	chr22:38453261-38471708	siKLF5	siNT	10.2946	15.1878	0.56102	3.12526	5e-05	0.000141705	yes
MBD2	MBD2	MBD2	chr18:51677970-51751158	siKLF5	siNT	6.04665	8.91884	0.56072	3.25965	5e-05	0.000141705	yes
ALS2	ALS2	ALS2	chr2:202564985-202645895	siKLF5	siNT	2.62615	3.87324	0.560594	2.43272	5e-05	0.000141705	yes
MCM8	MCM8	MCM8	chr20:5931297-5975831	siKLF5	siNT	7.90865	11.6642	0.560582	3.23734	5e-05	0.000141705	yes
UBQLN1	UBQLN1	UBQLN1	chr9:86274877-86323168	siKLF5	siNT	46.6573	68.8127	0.560573	3.51377	5e-05	0.000141705	yes
NOL6	NOL6	NOL6	chr9:33461350-33473941	siKLF5	siNT	11.2972	16.6607	0.560491	3.38363	5e-05	0.000141705	yes
SETD1B	SETD1B	SETD1B	chr12:122242637-122270562	siKLF5	siNT	2.38959	3.52404	0.560471	3.11819	5e-05	0.000141705	yes
URGCP	URGCP	URGCP	chr7:43906156-43965996	siKLF5	siNT	10.0879	14.8763	0.560382	1.89456	0.0019	0.0041615	yes
KAT7	KAT7	KAT7	chr17:47865980-47906458	siKLF5	siNT	17.2095	25.3681	0.559813	3.41046	5e-05	0.000141705	yes
KIF13B	KIF13B	KIF13B	chr8:28924794-29120610	siKLF5	siNT	6.74428	9.93961	0.559524	3.39743	5e-05	0.000141705	yes
MTMR10	MTMR10	MTMR10	chr15:31196054-31283807	siKLF5	siNT	5.51364	8.12227	0.558877	2.38184	5e-05	0.000141705	yes
SNRNP70	SNRNP70	SNRNP70	chr19:49588464-49611870	siKLF5	siNT	63.6774	93.7598	0.558187	3.45473	5e-05	0.000141705	yes
TOR4A	TOR4A	TOR4A	chr9:140172279-140177093	siKLF5	siNT	20.9113	30.7888	0.558119	3.42898	5e-05	0.000141705	yes
THOP1	THOP1	THOP1	chr19:2785505-2813599	siKLF5	siNT	15.3343	22.5704	0.557668	3.28896	5e-05	0.000141705	yes
SOLH	SOLH	SOLH	chr16:577855-604636	siKLF5	siNT	12.5042	18.398	0.557133	3.37661	5e-05	0.000141705	yes
GPKOW	GPKOW	GPKOW	chrX:48969021-48980079	siKLF5	siNT	4.57557	6.73122	0.556917	2.93063	5e-05	0.000141705	yes
ABCF2	ABCF2	ABCF2	chr7:150904922-150924317	siKLF5	siNT	29.7304	43.7365	0.556898	3.26725	5e-05	0.000141705	yes
CBL	CBL	CBL	chr11:119076985-119178859	siKLF5	siNT	3.80109	5.59175	0.556886	3.32454	5e-05	0.000141705	yes
FAM101B	FAM101B	FAM101B	chr17:289770-295731	siKLF5	siNT	1.62728	2.39226	0.555908	2.48234	5e-05	0.000141705	yes
POLR1A	POLR1A	POLR1A	chr2:86253450-86333278	siKLF5	siNT	10.4702	15.3912	0.555821	3.39857	5e-05	0.000141705	yes
PDAP1	PDAP1	PDAP1	chr7:98972297-99006305	siKLF5	siNT	49.4788	72.7315	0.555769	2.18643	0.0001	0.000273198	yes
RAVER1	RAVER1	RAVER1	chr19:10426888-10444314	siKLF5	siNT	15.7021	23.0781	0.555571	3.35841	5e-05	0.000141705	yes
NSRP1	NSRP1	NSRP1	chr17:28443824-28513493	siKLF5	siNT	10.8623	15.9644	0.555531	3.17751	5e-05	0.000141705	yes
REPS1	REPS1	REPS1	chr6:139225619-139309398	siKLF5	siNT	10.7542	15.8045	0.555435	3.27878	5e-05	0.000141705	yes
KIF16B	KIF16B	KIF16B	chr20:16252748-16554079	siKLF5	siNT	10.7237	15.7571	0.555193	3.32807	5e-05	0.000141705	yes
BCORL1	BCORL1	BCORL1	chrX:129139163-129192058	siKLF5	siNT	1.80328	2.64963	0.555166	2.91311	5e-05	0.000141705	yes
MFSD12	MFSD12	MFSD12	chr19:3538262-3557571	siKLF5	siNT	18.8587	27.707	0.555016	3.24317	5e-05	0.000141705	yes
FAM155B	FAM155B	FAM155B	chrX:68725077-68752351	siKLF5	siNT	2.24648	3.29977	0.554701	2.71594	5e-05	0.000141705	yes
SLC35A4	SLC35A4	SLC35A4	chr5:139944419-139948683	siKLF5	siNT	23.6146	34.6733	0.554147	3.36569	5e-05	0.000141705	yes
ZNF664	ZNF664	ZNF664	chr12:124457761-124800570	siKLF5	siNT	23.5327	34.5416	0.55367	2.78572	5e-05	0.000141705	yes
PTPRE	PTPRE	PTPRE	chr10:129705324-129884164	siKLF5	siNT	1.57822	2.31571	0.55316	2.65065	5e-05	0.000141705	yes
RARA	RARA	RARA	chr17:38465422-38513895	siKLF5	siNT	6.00489	8.81033	0.553059	3.04118	5e-05	0.000141705	yes
MAP1S	MAP1S	MAP1S	chr19:17830302-17845324	siKLF5	siNT	15.7107	23.0485	0.552922	3.32601	5e-05	0.000141705	yes
CLIP2	CLIP2	CLIP2	chr7:73703804-73820273	siKLF5	siNT	21.8899	32.1119	0.552841	3.443	5e-05	0.000141705	yes
CPLX2	CPLX2	CPLX2	chr5:175223609-175311023	siKLF5	siNT	7.69991	11.2948	0.552742	3.23672	5e-05	0.000141705	yes
RPTOR	RPTOR	RPTOR	chr17:78518624-78940173	siKLF5	siNT	6.22615	9.13281	0.552717	3.32008	5e-05	0.000141705	yes
RFX3	RFX3	RFX3	chr9:3224646-3525983	siKLF5	siNT	0.811993	1.1908	0.552394	1.91848	0.0014	0.00314661	yes
PPARD	PPARD	PPARD	chr6:35310334-35395968	siKLF5	siNT	6.61117	9.695	0.552336	3.09951	5e-05	0.000141705	yes
SLC25A22	SLC25A22	SLC25A22	chr11:790474-798269	siKLF5	siNT	18.399	26.9787	0.552191	3.28719	5e-05	0.000141705	yes
NKRF	NKRF	NKRF	chrX:118722299-118739846	siKLF5	siNT	8.89152	13.0312	0.551471	3.21457	5e-05	0.000141705	yes
CHAF1B	CHAF1B	CHAF1B	chr21:37757688-37789125	siKLF5	siNT	15.5313	22.7591	0.551266	3.225	5e-05	0.000141705	yes
CLASRP	CLASRP	CLASRP	chr19:45542297-45574214	siKLF5	siNT	8.23019	12.0577	0.550951	3.0152	5e-05	0.000141705	yes
GLB1L2	GLB1L2	GLB1L2	chr11:134201767-134246218	siKLF5	siNT	54.0067	79.1181	0.550869	3.43671	5e-05	0.000141705	yes
TOE1	TOE1	TOE1	chr1:45794913-45956840	siKLF5	siNT	3.85688	5.64953	0.550697	1.90498	0.00135	0.00304202	yes
ACTG1	ACTG1	ACTG1	chr17:79476996-79479892	siKLF5	siNT	1670.59	2447.07	0.550696	3.07229	5e-05	0.000141705	yes
CNOT3	CNOT3	CNOT3	chr19:54641435-54663446	siKLF5	siNT	27.7146	40.596	0.550693	3.2558	5e-05	0.000141705	yes
FOXQ1	FOXQ1	FOXQ1	chr6:1312674-1314993	siKLF5	siNT	45.2059	66.2162	0.550674	3.40392	5e-05	0.000141705	yes
RFWD3	RFWD3	RFWD3	chr16:74655296-74700779	siKLF5	siNT	9.18342	13.4512	0.550633	3.29363	5e-05	0.000141705	yes
CHFR	CHFR	CHFR	chr12:133416937-133464204	siKLF5	siNT	6.43842	9.42863	0.550342	3.07022	5e-05	0.000141705	yes
TCF3	TCF3	TCF3	chr19:1609288-1652328	siKLF5	siNT	22.8586	33.4703	0.550146	3.39478	5e-05	0.000141705	yes
OGFR	OGFR	OGFR	chr20:61436176-61445352	siKLF5	siNT	15.3365	22.4516	0.549848	3.22749	5e-05	0.000141705	yes
RXRA	RXRA	RXRA	chr9:137218315-137332431	siKLF5	siNT	32.598	47.7095	0.549493	3.42766	5e-05	0.000141705	yes
BIN1	BIN1	BIN1	chr2:127805598-127864903	siKLF5	siNT	58.1245	85.0634	0.549392	3.40804	5e-05	0.000141705	yes
CTTNBP2NL	CTTNBP2NL	CTTNBP2NL	chr1:112938799-113003786	siKLF5	siNT	3.06168	4.48051	0.54934	3.0245	5e-05	0.000141705	yes
SRGAP1	SRGAP1	SRGAP1	chr12:64238540-64541613	siKLF5	siNT	1.79252	2.62223	0.548803	2.95603	5e-05	0.000141705	yes
CDC42EP4	CDC42EP4	CDC42EP4	chr17:71279762-71308143	siKLF5	siNT	46.0127	67.3029	0.548636	3.41626	5e-05	0.000141705	yes
KIF14	KIF14	KIF14	chr1:200520624-200589862	siKLF5	siNT	3.61007	5.27938	0.54834	3.14329	5e-05	0.000141705	yes
ELAC2	ELAC2	ELAC2	chr17:12692828-12921381	siKLF5	siNT	30.7202	44.9206	0.548189	3.29979	5e-05	0.000141705	yes
WDR1	WDR1	WDR1	chr4:10075962-10118573	siKLF5	siNT	88.2194	128.979	0.547971	3.41105	5e-05	0.000141705	yes
MLPH	MLPH	MLPH	chr2:238395877-238463961	siKLF5	siNT	23.7334	34.6922	0.547693	3.37437	5e-05	0.000141705	yes
YLPM1	YLPM1	YLPM1	chr14:75230068-75304013	siKLF5	siNT	7.44848	10.882	0.546929	3.32292	5e-05	0.000141705	yes
EDC4	EDC4	EDC4	chr16:67906925-67918417	siKLF5	siNT	6.38089	9.32032	0.546623	3.17522	5e-05	0.000141705	yes
KCTD1	KCTD1	KCTD1	chr18:24034873-24237365	siKLF5	siNT	12.3294	18.0084	0.546573	3.06685	5e-05	0.000141705	yes
TARSL2	TARSL2	TARSL2	chr15:102193954-102264645	siKLF5	siNT	4.46926	6.52758	0.546514	2.91071	5e-05	0.000141705	yes
BCL2L2	BCL2L2	BCL2L2	chr14:23775970-23795394	siKLF5	siNT	4.39514	6.41889	0.546415	1.5256	0.0096	0.0179532	yes
RASAL2	RASAL2	RASAL2	chr1:178060642-178448648	siKLF5	siNT	1.93856	2.83105	0.54635	3.02922	5e-05	0.000141705	yes
DNAJC11	DNAJC11	DNAJC11	chr1:6684924-6761966	siKLF5	siNT	18.0123	26.2958	0.545854	3.09645	5e-05	0.000141705	yes
ASS1	ASS1	ASS1	chr9:133320093-133376661	siKLF5	siNT	195.645	285.588	0.545693	3.40017	5e-05	0.000141705	yes
LRCH4	LRCH4	LRCH4	chr7:100171633-100183776	siKLF5	siNT	12.1899	17.7902	0.545393	3.22043	5e-05	0.000141705	yes
APEX1	APEX1	APEX1	chr14:20923289-20925931	siKLF5	siNT	66.7728	97.4195	0.544949	3.36251	5e-05	0.000141705	yes
MLLT1	MLLT1	MLLT1	chr19:6210391-6279959	siKLF5	siNT	11.8021	17.2106	0.544257	3.28283	5e-05	0.000141705	yes
ARHGAP26	ARHGAP26	ARHGAP26	chr5:142150291-142608572	siKLF5	siNT	4.00092	5.8335	0.54403	3.19119	5e-05	0.000141705	yes
CTNND1	CTNND1	CTNND1	chr11:57479994-57586652	siKLF5	siNT	45.1962	65.8673	0.543361	2.5047	5e-05	0.000141705	yes
PRPF6	PRPF6	PRPF6	chr20:62612430-62664453	siKLF5	siNT	46.0321	67.0619	0.542854	3.37425	5e-05	0.000141705	yes
SEMA4B	SEMA4B	SEMA4B	chr15:90728151-90772892	siKLF5	siNT	25.9204	37.7618	0.542842	3.33561	5e-05	0.000141705	yes
CDC42BPB	CDC42BPB	CDC42BPB	chr14:103398715-103523742	siKLF5	siNT	19.2218	27.9983	0.5426	3.37544	5e-05	0.000141705	yes
TEAD3	TEAD3	TEAD3	chr6:35441373-35464861	siKLF5	siNT	7.20982	10.5011	0.542501	3.03521	5e-05	0.000141705	yes
CTNNBL1	CTNNBL1	CTNNBL1	chr20:36322433-36500520	siKLF5	siNT	22.0757	32.1313	0.541523	3.20282	5e-05	0.000141705	yes
PIK3AP1	PIK3AP1	PIK3AP1	chr10:98353068-98480279	siKLF5	siNT	10.2045	14.8509	0.541336	3.25065	5e-05	0.000141705	yes
DAAM2	DAAM2	DAAM2	chr6:39760158-39902290	siKLF5	siNT	1.479	2.15201	0.541064	2.58427	5e-05	0.000141705	yes
SLC52A2	SLC52A2	SLC52A2	chr8:145582216-145584948	siKLF5	siNT	49.0567	71.3691	0.54085	3.29808	5e-05	0.000141705	yes
CCDC22	CCDC22	CCDC22	chrX:49091926-49121288	siKLF5	siNT	4.62079	6.72197	0.540744	2.70858	5e-05	0.000141705	yes
NUDT15	NUDT15	NUDT15	chr13:48611702-48621282	siKLF5	siNT	16.0939	23.4091	0.540554	3.13861	5e-05	0.000141705	yes
LMO7	LMO7	LMO7	chr13:76194569-76434006	siKLF5	siNT	27.2364	39.6078	0.54025	3.36016	5e-05	0.000141705	yes
ADRBK2	ADRBK2	ADRBK2	chr22:25960860-26125258	siKLF5	siNT	2.67802	3.89412	0.540131	3.07708	5e-05	0.000141705	yes
MRGBP	MRGBP	MRGBP	chr20:61427804-61431945	siKLF5	siNT	33.6968	48.987	0.539786	3.25005	5e-05	0.000141705	yes
SF3B4	SF3B4	SF3B4	chr1:149895208-149900144	siKLF5	siNT	59.947	87.1406	0.539658	3.34415	5e-05	0.000141705	yes
KIAA1671	KIAA1671	KIAA1671	chr22:25423940-25593415	siKLF5	siNT	12.481	18.1415	0.539559	3.34527	5e-05	0.000141705	yes
SEPT11	SEPT11	SEPT11	chr4:77870894-77959768	siKLF5	siNT	22.7377	33.0421	0.539217	3.35002	5e-05	0.000141705	yes
HOXC13	HOXC13	HOXC13	chr12:54329111-54340328	siKLF5	siNT	3.14046	4.56317	0.539059	2.44027	5e-05	0.000141705	yes
VPS4B	VPS4B	VPS4B	chr18:61056424-61089752	siKLF5	siNT	9.66986	14.0408	0.53806	3.13889	5e-05	0.000141705	yes
C17orf85	C17orf85	C17orf85	chr17:3710044-3749545	siKLF5	siNT	4.3941	6.37933	0.537838	3.17169	5e-05	0.000141705	yes
CDK2AP2	CDK2AP2	CDK2AP2	chr11:67273960-67276199	siKLF5	siNT	91.0618	132.176	0.537538	3.23343	5e-05	0.000141705	yes
QSER1	QSER1	QSER1	chr11:32914791-33001814	siKLF5	siNT	6.37285	9.24963	0.537457	3.26328	5e-05	0.000141705	yes
SPAG5	SPAG5	SPAG5	chr17:26904582-26926056	siKLF5	siNT	17.7285	25.7179	0.5367	3.27594	5e-05	0.000141705	yes
INTS3	INTS3	INTS3	chr1:153700566-153746555	siKLF5	siNT	10.8442	15.7306	0.536651	3.2236	5e-05	0.000141705	yes
ZC3H13	ZC3H13	ZC3H13	chr13:46536313-46626894	siKLF5	siNT	12.2617	17.7773	0.535877	3.28948	5e-05	0.000141705	yes
TOP2A	TOP2A	TOP2A	chr17:38544772-38574202	siKLF5	siNT	45.0344	65.2798	0.535609	3.34388	5e-05	0.000141705	yes
CAMTA2	CAMTA2	CAMTA2	chr17:4871286-4890960	siKLF5	siNT	5.86417	8.49811	0.535215	3.06076	5e-05	0.000141705	yes
TFG	TFG	TFG	chr3:100428133-100467811	siKLF5	siNT	51.0482	73.9556	0.534801	3.24791	5e-05	0.000141705	yes
DNAJA1	DNAJA1	DNAJA1	chr9:33025208-33039062	siKLF5	siNT	64.737	93.7802	0.534692	3.29594	5e-05	0.000141705	yes
HOXB9	HOXB9	HOXB9	chr17:46698518-46703835	siKLF5	siNT	1.24974	1.80979	0.534204	2.12164	0.00035	0.000877178	yes
FARSA	FARSA	FARSA	chr19:13033283-13044558	siKLF5	siNT	47.7683	69.175	0.534197	3.28374	5e-05	0.000141705	yes
GIT1	GIT1	GIT1	chr17:27900486-27916610	siKLF5	siNT	21.7684	31.5136	0.533743	3.27776	5e-05	0.000141705	yes
SRRM1	SRRM1	SRRM1	chr1:24969593-24999772	siKLF5	siNT	20.9936	30.3852	0.533417	3.27948	5e-05	0.000141705	yes
TRIM2	TRIM2	TRIM2	chr4:154074269-154260474	siKLF5	siNT	15.47	22.3885	0.533283	3.31245	5e-05	0.000141705	yes
ARHGEF16	ARHGEF16	ARHGEF16	chr1:3371146-3397677	siKLF5	siNT	15.4294	22.3292	0.533248	3.18189	5e-05	0.000141705	yes
TJP2	TJP2	TJP2	chr9:71736179-71870124	siKLF5	siNT	58.0587	84.0126	0.533094	3.33265	5e-05	0.000141705	yes
UPF3B	UPF3B	UPF3B	chrX:118967988-118986991	siKLF5	siNT	8.02934	11.6182	0.533033	2.92214	5e-05	0.000141705	yes
FAM102A	FAM102A	FAM102A	chr9:130702860-130742812	siKLF5	siNT	31.79	45.9962	0.53294	3.30178	5e-05	0.000141705	yes
DDX3X	DDX3X	DDX3X	chrX:41192650-41209524	siKLF5	siNT	48.489	70.1561	0.53291	3.32133	5e-05	0.000141705	yes
ZC3H3	ZC3H3	ZC3H3	chr8:144519824-144623620	siKLF5	siNT	9.21048	13.3249	0.532772	3.08389	5e-05	0.000141705	yes
USP5	USP5	USP5	chr12:6961284-6975795	siKLF5	siNT	32.7544	47.3846	0.532728	3.3231	5e-05	0.000141705	yes
CKAP5	CKAP5	CKAP5	chr11:46765083-46867859	siKLF5	siNT	25.8292	37.363	0.532604	3.33311	5e-05	0.000141705	yes
TNFRSF1B	TNFRSF1B	TNFRSF1B	chr1:12227059-12269277	siKLF5	siNT	6.16548	8.9174	0.53241	3.00138	5e-05	0.000141705	yes
CNKSR1	CNKSR1	CNKSR1	chr1:26503980-26516375	siKLF5	siNT	4.50308	6.5128	0.532367	2.69393	5e-05	0.000141705	yes
DGCR5	DGCR5	DGCR5	chr22:18958010-18982142	siKLF5	siNT	3.99453	5.77658	0.532189	2.76286	5e-05	0.000141705	yes
PRKAR1B	PRKAR1B	PRKAR1B	chr7:588833-826116	siKLF5	siNT	14.4586	20.9064	0.532019	2.22266	0.0001	0.000273198	yes
LATS1	LATS1	LATS1	chr6:149979288-150039392	siKLF5	siNT	4.87896	7.05168	0.531393	2.5869	5e-05	0.000141705	yes
ZBTB7B	ZBTB7B	ZBTB7B	chr1:154975105-154991001	siKLF5	siNT	10.6447	15.3846	0.531349	3.12116	5e-05	0.000141705	yes
SDR16C5	SDR16C5	SDR16C5	chr8:57212569-57233241	siKLF5	siNT	5.06559	7.3204	0.531193	2.84562	5e-05	0.000141705	yes
FUBP1	FUBP1	FUBP1	chr1:78413590-78444777	siKLF5	siNT	31.615	45.6844	0.531095	3.27113	5e-05	0.000141705	yes
ZNF696	ZNF696	ZNF696	chr8:144373558-144382120	siKLF5	siNT	3.00353	4.34012	0.531076	2.81466	5e-05	0.000141705	yes
TRIB2	TRIB2	TRIB2	chr2:12856997-12882858	siKLF5	siNT	1.36984	1.9794	0.531058	2.38797	5e-05	0.000141705	yes
INPP4B	INPP4B	INPP4B	chr4:142949181-143767604	siKLF5	siNT	6.66764	9.63191	0.530646	3.02741	5e-05	0.000141705	yes
CSTF2	CSTF2	CSTF2	chrX:100075347-100095923	siKLF5	siNT	20.8959	30.1854	0.530634	3.14502	5e-05	0.000141705	yes
IPO4	IPO4	IPO4	chr14:24641233-24658124	siKLF5	siNT	32.9583	47.6089	0.530589	3.27577	5e-05	0.000141705	yes
TBL3	TBL3	TBL3	chr16:2022063-2028751	siKLF5	siNT	14.1812	20.4841	0.530522	3.11742	5e-05	0.000141705	yes
GPRC5C	GPRC5C	GPRC5C	chr17:72427666-72443568	siKLF5	siNT	42.3512	61.1655	0.530317	3.22322	5e-05	0.000141705	yes
KRI1	KRI1	KRI1	chr19:10654646-10676702	siKLF5	siNT	8.62044	12.4491	0.530204	2.37678	5e-05	0.000141705	yes
DAB2IP	DAB2IP	DAB2IP	chr9:124329398-124547809	siKLF5	siNT	37.4846	54.1257	0.530017	3.21616	5e-05	0.000141705	yes
ETV4	ETV4	ETV4	chr17:41605210-41623800	siKLF5	siNT	33.089	47.7724	0.529826	3.21223	5e-05	0.000141705	yes
SUPT5H	SUPT5H	SUPT5H	chr19:39936185-39967308	siKLF5	siNT	35.8491	51.7551	0.529762	3.2825	5e-05	0.000141705	yes
SBDS	SBDS	SBDS	chr7:66452689-66460588	siKLF5	siNT	69.6276	100.516	0.529694	3.27549	5e-05	0.000141705	yes
RCOR1	RCOR1	RCOR1	chr14:103058995-103196913	siKLF5	siNT	9.84015	14.2033	0.52947	3.20755	5e-05	0.000141705	yes
CCR6	CCR6	CCR6	chr6:167525294-167552629	siKLF5	siNT	1.33713	1.92984	0.529345	2.22408	0.00015	0.000398712	yes
HABP4	HABP4	HABP4	chr9:99212413-99253618	siKLF5	siNT	9.63526	13.9062	0.529329	3.01747	5e-05	0.000141705	yes
KLHDC4	KLHDC4	KLHDC4	chr16:87741417-87799598	siKLF5	siNT	5.78927	8.35537	0.529324	2.64669	5e-05	0.000141705	yes
FOXJ2	FOXJ2	FOXJ2	chr12:8185358-8208118	siKLF5	siNT	6.68508	9.64797	0.52928	3.12104	5e-05	0.000141705	yes
TPX2	TPX2	TPX2	chr20:30326903-30389603	siKLF5	siNT	66.1516	95.4467	0.52892	3.30435	5e-05	0.000141705	yes
LARP1	LARP1	LARP1	chr5:154092461-154197163	siKLF5	siNT	30.5049	44.0072	0.528698	3.30258	5e-05	0.000141705	yes
STXBP5	STXBP5	STXBP5	chr6:147162524-147711612	siKLF5	siNT	2.09375	3.02049	0.528692	2.91556	5e-05	0.000141705	yes
RAD18	RAD18	RAD18	chr3:8918879-9005159	siKLF5	siNT	5.16933	7.45703	0.528625	3.06312	5e-05	0.000141705	yes
PLAUR	PLAUR	PLAUR	chr19:44150246-44174498	siKLF5	siNT	58.3509	84.1727	0.528597	3.21788	5e-05	0.000141705	yes
ORAOV1	ORAOV1	ORAOV1	chr11:69480331-69490165	siKLF5	siNT	8.33949	12.0297	0.528571	2.94492	5e-05	0.000141705	yes
SMARCA4	SMARCA4	SMARCA4	chr19:11071597-11172958	siKLF5	siNT	25.2101	36.365	0.52855	3.28247	5e-05	0.000141705	yes
SAPCD2	SAPCD2	SAPCD2	chr9:139956578-139965028	siKLF5	siNT	57.3933	82.7868	0.528519	3.29948	5e-05	0.000141705	yes
IWS1	IWS1	IWS1	chr2:128238382-128284087	siKLF5	siNT	12.2072	17.6005	0.527884	3.10191	5e-05	0.000141705	yes
ARHGEF11	ARHGEF11	ARHGEF11	chr1:156904631-157015162	siKLF5	siNT	6.22584	8.97326	0.527363	3.14294	5e-05	0.000141705	yes
ISG20	ISG20	ISG20	chr15:89182038-89198879	siKLF5	siNT	23.3866	33.7067	0.527354	2.8998	5e-05	0.000141705	yes
ZC3H4	ZC3H4	ZC3H4	chr19:47567446-47617009	siKLF5	siNT	10.1029	14.56	0.527241	3.2073	5e-05	0.000141705	yes
LRRC16A	LRRC16A	LRRC16A	chr6:25279655-25620758	siKLF5	siNT	12.2015	17.5768	0.526617	3.20251	5e-05	0.000141705	yes
UBAP2L	UBAP2L	UBAP2L	chr1:154179182-154243329	siKLF5	siNT	36.2148	52.1687	0.526605	1.61365	0.0094	0.0176168	yes
PHF8	PHF8	PHF8	chrX:53963112-54071569	siKLF5	siNT	3.09247	4.45474	0.526581	2.83818	5e-05	0.000141705	yes
LRFN1	LRFN1	LRFN1	chr19:39797456-39805976	siKLF5	siNT	2.83298	4.08023	0.52633	2.55821	5e-05	0.000141705	yes
ANP32A	ANP32A	ANP32A	chr15:69070874-69113261	siKLF5	siNT	46.6477	67.1842	0.526316	3.25567	5e-05	0.000141705	yes
KDM2B	KDM2B	KDM2B	chr12:121866899-122018920	siKLF5	siNT	3.67918	5.29888	0.526304	2.92058	5e-05	0.000141705	yes
ZNF148	ZNF148	ZNF148	chr3:124944512-125094198	siKLF5	siNT	3.92624	5.65351	0.526	3.10956	5e-05	0.000141705	yes
RIN1	RIN1	RIN1	chr11:66099541-66104000	siKLF5	siNT	3.47947	5.00968	0.525849	2.57213	5e-05	0.000141705	yes
POLR3E	POLR3E	POLR3E	chr16:22308695-22346424	siKLF5	siNT	11.3638	16.3611	0.525817	3.11407	5e-05	0.000141705	yes
CCDC112	CCDC112	CCDC112	chr5:114602884-114632458	siKLF5	siNT	2.77158	3.98725	0.524685	2.39671	0.0001	0.000273198	yes
TPRG1	TPRG1	TPRG1	chr3:188889762-189041271	siKLF5	siNT	1.7651	2.53899	0.524501	2.4045	5e-05	0.000141705	yes
SIK2	SIK2	SIK2	chr11:111473169-111637169	siKLF5	siNT	6.04223	8.6893	0.524158	1.62881	0.0057	0.0112326	yes
KBTBD8	KBTBD8	KBTBD8	chr3:67048726-67061632	siKLF5	siNT	1.0668	1.53386	0.523879	2.26574	0.00015	0.000398712	yes
XPO5	XPO5	XPO5	chr6:43490067-43543812	siKLF5	siNT	37.5912	54.0477	0.523838	3.27306	5e-05	0.000141705	yes
ARFRP1	ARFRP1	ARFRP1	chr20:62289162-62367494	siKLF5	siNT	8.59234	12.3509	0.52349	1.8191	0.0014	0.00314661	yes
ERBB4	ERBB4	ERBB4	chr2:212240441-213403352	siKLF5	siNT	0.816523	1.17363	0.523406	2.61002	5e-05	0.000141705	yes
ZNF628	ZNF628	ZNF628	chr19:55987698-55995854	siKLF5	siNT	2.67116	3.83921	0.523346	2.62323	5e-05	0.000141705	yes
PRKCG	PRKCG	PRKCG	chr19:54385466-54410901	siKLF5	siNT	1.6356	2.35066	0.523241	2.3139	5e-05	0.000141705	yes
TEAD4	TEAD4	TEAD4	chr12:3068477-3149842	siKLF5	siNT	16.6594	23.942	0.523205	2.99397	5e-05	0.000141705	yes
ALDH1A2	ALDH1A2	ALDH1A2	chr15:58245621-58358121	siKLF5	siNT	3.49189	5.01739	0.52293	2.72121	5e-05	0.000141705	yes
STK24	STK24	STK24	chr13:99102454-99229396	siKLF5	siNT	52.5923	75.5598	0.522769	3.25705	5e-05	0.000141705	yes
C1orf21	C1orf21	C1orf21	chr1:184356149-184598155	siKLF5	siNT	4.42229	6.35273	0.522582	3.13061	5e-05	0.000141705	yes
GMIP	GMIP	GMIP	chr19:19740284-19754455	siKLF5	siNT	8.22236	11.8094	0.522316	3.01022	5e-05	0.000141705	yes
PARP1	PARP1	PARP1	chr1:226548391-226595801	siKLF5	siNT	99.1749	142.431	0.52222	3.24082	5e-05	0.000141705	yes
LRP12	LRP12	LRP12	chr8:105501458-105601252	siKLF5	siNT	1.05214	1.51075	0.521945	2.20834	0.00015	0.000398712	yes
LEMD2	LEMD2	LEMD2	chr6:33738989-33756906	siKLF5	siNT	10.0905	14.4886	0.521918	2.99921	5e-05	0.000141705	yes
C11orf63	C11orf63	C11orf63	chr11:122753472-122830430	siKLF5	siNT	2.82434	4.0532	0.521147	2.18743	0.00015	0.000398712	yes
DNAJC7	DNAJC7	DNAJC7	chr17:40118758-40190044	siKLF5	siNT	26.9324	38.6432	0.520872	2.00903	0.0004	0.000994575	yes
C12orf5	C12orf5	C12orf5	chr12:4430358-4469190	siKLF5	siNT	2.03984	2.92678	0.520862	2.83775	5e-05	0.000141705	yes
TRIM25	TRIM25	TRIM25	chr17:54965269-54991409	siKLF5	siNT	23.2344	33.3292	0.520526	3.2389	5e-05	0.000141705	yes
KIF18B	KIF18B	KIF18B	chr17:43002078-43025079	siKLF5	siNT	17.1407	24.583	0.520235	3.18083	5e-05	0.000141705	yes
CTXN1	CTXN1	CTXN1	chr19:7989380-7991051	siKLF5	siNT	7.39577	10.6058	0.520075	2.48748	5e-05	0.000141705	yes
TBC1D2	TBC1D2	TBC1D2	chr9:100961279-101018003	siKLF5	siNT	3.01291	4.3201	0.519907	2.5558	5e-05	0.000141705	yes
CDK5RAP2	CDK5RAP2	CDK5RAP2	chr9:123151146-123342448	siKLF5	siNT	11.011	15.7879	0.519873	3.15536	5e-05	0.000141705	yes
SON	SON	SON	chr21:34915349-34949812	siKLF5	siNT	23.563	33.7828	0.519767	3.23884	5e-05	0.000141705	yes
AARSD1	AARSD1	AARSD1	chr17:41102542-41132545	siKLF5	siNT	11.705	16.7807	0.519671	2.60395	5e-05	0.000141705	yes
LRP8	LRP8	LRP8	chr1:53692563-53793821	siKLF5	siNT	5.53179	7.93024	0.519618	2.38504	5e-05	0.000141705	yes
GMEB2	GMEB2	GMEB2	chr20:62218954-62258381	siKLF5	siNT	7.64492	10.9589	0.519533	3.02635	5e-05	0.000141705	yes
ARHGAP35	ARHGAP35	ARHGAP35	chr19:47421932-47508333	siKLF5	siNT	16.4448	23.5533	0.518293	3.22935	5e-05	0.000141705	yes
CNOT6	CNOT6	CNOT6	chr5:179921416-180005353	siKLF5	siNT	8.10937	11.6143	0.518241	3.11949	5e-05	0.000141705	yes
UBAP2	UBAP2	UBAP2	chr9:33921690-34048947	siKLF5	siNT	8.25067	11.8131	0.517805	3.04172	5e-05	0.000141705	yes
TNRC18	TNRC18	TNRC18	chr7:5346422-5463177	siKLF5	siNT	9.80239	14.0299	0.517298	3.20138	5e-05	0.000141705	yes
IYD	IYD	IYD	chr6:150690027-150725765	siKLF5	siNT	0.766884	1.09738	0.516982	2.35069	5e-05	0.000141705	yes
FXR2	FXR2	FXR2	chr17:7494547-7536700	siKLF5	siNT	6.13599	8.77993	0.516915	2.1996	0.00025	0.000640006	yes
RASA1	RASA1	RASA1	chr5:86564069-86687743	siKLF5	siNT	3.22965	4.62062	0.516709	2.68224	5e-05	0.000141705	yes
ST14	ST14	ST14	chr11:130029681-130080257	siKLF5	siNT	196.929	281.736	0.516669	3.16917	5e-05	0.000141705	yes
UTP14A	UTP14A	UTP14A	chrX:129040096-129063738	siKLF5	siNT	19.7337	28.2302	0.516577	3.10099	5e-05	0.000141705	yes
PHF14	PHF14	PHF14	chr7:11013498-11209250	siKLF5	siNT	21.1969	30.3174	0.516289	2.84428	5e-05	0.000141705	yes
HNRNPR	HNRNPR	HNRNPR	chr1:23636275-23670853	siKLF5	siNT	68.4772	97.9384	0.516251	3.23743	5e-05	0.000141705	yes
NCBP1	NCBP1	NCBP1	chr9:100263461-100436029	siKLF5	siNT	22.8183	32.6281	0.515927	2.96738	5e-05	0.000141705	yes
ZNF488	ZNF488	ZNF488	chr10:48355088-48373866	siKLF5	siNT	2.46246	3.52073	0.515777	2.48539	5e-05	0.000141705	yes
CDHR5	CDHR5	CDHR5	chr11:616564-625067	siKLF5	siNT	8.19282	11.7108	0.515413	2.90012	5e-05	0.000141705	yes
INPP4A	INPP4A	INPP4A	chr2:99061320-99207496	siKLF5	siNT	2.10872	3.01398	0.515302	2.29455	5e-05	0.000141705	yes
CD24	CD24	CD24	chrY:21094584-21239302	siKLF5	siNT	148.862	212.716	0.514956	3.20401	5e-05	0.000141705	yes
DDX21	DDX21	DDX21	chr10:70715878-70744825	siKLF5	siNT	35.7175	51.0287	0.514681	3.21479	5e-05	0.000141705	yes
ENKD1	ENKD1	ENKD1	chr16:67696849-67700628	siKLF5	siNT	3.60561	5.15023	0.514392	2.21471	0.0001	0.000273198	yes
TNKS1BP1	TNKS1BP1	TNKS1BP1	chr11:57067102-57092413	siKLF5	siNT	14.4364	20.6199	0.514326	3.16585	5e-05	0.000141705	yes
WASF1	WASF1	WASF1	chr6:110421021-110501207	siKLF5	siNT	1.73789	2.48223	0.5143	2.23287	5e-05	0.000141705	yes
GRIPAP1	GRIPAP1	GRIPAP1	chrX:48830133-48858675	siKLF5	siNT	4.15271	5.93049	0.514098	2.67457	5e-05	0.000141705	yes
EVPL	EVPL	EVPL	chr17:74002926-74023507	siKLF5	siNT	5.50407	7.85853	0.513761	3.02358	5e-05	0.000141705	yes
OXSR1	OXSR1	OXSR1	chr3:38207025-38296979	siKLF5	siNT	12.1501	17.3404	0.513164	3.10114	5e-05	0.000141705	yes
HELZ2	HELZ2	HELZ2	chr20:62189438-62205592	siKLF5	siNT	2.36774	3.37871	0.512959	2.81537	5e-05	0.000141705	yes
CTPS1	CTPS1	CTPS1	chr1:41445006-41478235	siKLF5	siNT	14.5965	20.8252	0.512706	3.06491	5e-05	0.000141705	yes
ELMSAN1	ELMSAN1	ELMSAN1	chr14:74181824-74253896	siKLF5	siNT	4.11335	5.86854	0.512688	2.99526	5e-05	0.000141705	yes
KIAA1549	KIAA1549	KIAA1549	chr7:138516126-138666064	siKLF5	siNT	1.68645	2.40595	0.512616	2.87307	5e-05	0.000141705	yes
KLF16	KLF16	KLF16	chr19:1852397-1863564	siKLF5	siNT	10.0059	14.274	0.512545	2.95284	5e-05	0.000141705	yes
HPCAL1	HPCAL1	HPCAL1	chr2:10443029-10567743	siKLF5	siNT	25.863	36.8808	0.511977	3.00546	5e-05	0.000141705	yes
CCNE1	CCNE1	CCNE1	chr19:30302900-30315215	siKLF5	siNT	13.4685	19.2033	0.511762	2.90579	5e-05	0.000141705	yes
HELLS	HELLS	HELLS	chr10:96305573-96361856	siKLF5	siNT	8.34916	11.9034	0.511676	2.9192	5e-05	0.000141705	yes
CDH3	CDH3	CDH3	chr16:68678150-68732957	siKLF5	siNT	1.02032	1.45462	0.511626	2.177	0.0002	0.000520576	yes
CASC3	CASC3	CASC3	chr17:38296506-38328431	siKLF5	siNT	14.2198	20.2696	0.51141	3.09794	5e-05	0.000141705	yes
UBQLN4	UBQLN4	UBQLN4	chr1:156005091-156023516	siKLF5	siNT	38.2176	54.4725	0.511292	3.17927	5e-05	0.000141705	yes
GPHN	GPHN	GPHN	chr14:66974124-67648525	siKLF5	siNT	8.26535	11.7779	0.510933	3.00667	5e-05	0.000141705	yes
LARP4B	LARP4B	LARP4B	chr10:852853-977645	siKLF5	siNT	17.6258	25.1107	0.510616	3.1834	5e-05	0.000141705	yes
FAT1	FAT1	FAT1	chr4:187508936-187644987	siKLF5	siNT	11.649	16.5954	0.510585	3.17926	5e-05	0.000141705	yes
R3HDM1	R3HDM1	R3HDM1	chr2:136289082-136482839	siKLF5	siNT	9.9011	14.1029	0.510332	3.0538	5e-05	0.000141705	yes
PDE4A	PDE4A	PDE4A	chr19:10527448-10580307	siKLF5	siNT	2.96195	4.21837	0.510138	2.6663	5e-05	0.000141705	yes
TOMM40	TOMM40	TOMM40	chr19:45394476-45406946	siKLF5	siNT	98.2626	139.937	0.510065	3.16818	5e-05	0.000141705	yes
RAB35	RAB35	RAB35	chr12:120532898-120554643	siKLF5	siNT	12.8112	18.244	0.510019	3.01334	5e-05	0.000141705	yes
TRMT61A	TRMT61A	TRMT61A	chr14:103995508-104003410	siKLF5	siNT	9.0426	12.8734	0.509587	2.93618	5e-05	0.000141705	yes
KDM5C	KDM5C	KDM5C	chrX:53220502-53254604	siKLF5	siNT	8.15012	11.6025	0.509543	3.07403	5e-05	0.000141705	yes
OTUD7B	OTUD7B	OTUD7B	chr1:149912231-149982686	siKLF5	siNT	4.88381	6.95127	0.509268	2.96404	5e-05	0.000141705	yes
MGRN1	MGRN1	MGRN1	chr16:4674824-4740975	siKLF5	siNT	10.8607	15.4552	0.508971	3.02408	5e-05	0.000141705	yes
PARP16	PARP16	PARP16	chr15:65550436-65579018	siKLF5	siNT	9.50682	13.5277	0.508883	2.8769	5e-05	0.000141705	yes
ATN1	ATN1	ATN1	chr12:7033625-7051484	siKLF5	siNT	16.6914	23.7508	0.508867	3.12368	5e-05	0.000141705	yes
DHX30	DHX30	DHX30	chr3:47844398-47891686	siKLF5	siNT	15.3133	21.7891	0.508813	2.98913	5e-05	0.000141705	yes
XYLT1	XYLT1	XYLT1	chr16:17196180-17564738	siKLF5	siNT	2.19333	3.12054	0.508676	2.84272	5e-05	0.000141705	yes
FBXL19	FBXL19	FBXL19	chr16:30930639-30960104	siKLF5	siNT	5.08173	7.22834	0.508345	2.7118	5e-05	0.000141705	yes
PRMT5	PRMT5	PRMT5	chr14:23389732-23398661	siKLF5	siNT	38.8154	55.207	0.508221	3.1324	5e-05	0.000141705	yes
MON1B	MON1B	MON1B	chr16:77224835-77246976	siKLF5	siNT	8.77107	12.4701	0.507653	2.9012	5e-05	0.000141705	yes
TP53INP2	TP53INP2	TP53INP2	chr20:33292147-33301237	siKLF5	siNT	0.811641	1.15393	0.507636	2.02558	0.0005	0.00122389	yes
MBD1	MBD1	MBD1	chr18:47793251-47808144	siKLF5	siNT	6.42723	9.13726	0.507565	2.69332	5e-05	0.000141705	yes
ATXN7L2	ATXN7L2	ATXN7L2	chr1:110026560-110035420	siKLF5	siNT	0.950447	1.35095	0.507298	1.7002	0.0038	0.00778312	yes
SF3A2	SF3A2	SF3A2	chr19:2236815-2248678	siKLF5	siNT	29.1279	41.402	0.507298	3.02219	5e-05	0.000141705	yes
CLINT1	CLINT1	CLINT1	chr5:157212750-157286183	siKLF5	siNT	18.5166	26.313	0.506957	3.11491	5e-05	0.000141705	yes
KAZALD1	KAZALD1	KAZALD1	chr10:102820998-102825351	siKLF5	siNT	6.50925	9.24861	0.506745	2.72637	5e-05	0.000141705	yes
TRAF3IP1	TRAF3IP1	TRAF3IP1	chr2:239229184-239309541	siKLF5	siNT	3.59366	5.1058	0.506685	2.69678	5e-05	0.000141705	yes
DNAJB1	DNAJB1	DNAJB1	chr19:14625581-14629201	siKLF5	siNT	90.8162	129.02	0.506575	3.16455	5e-05	0.000141705	yes
MEF2A	MEF2A	MEF2A	chr15:100106132-100256629	siKLF5	siNT	4.70594	6.68423	0.506278	2.86859	5e-05	0.000141705	yes
RBM17	RBM17	RBM17	chr10:6130948-6159422	siKLF5	siNT	26.8882	38.1863	0.506082	3.11037	5e-05	0.000141705	yes
ISL2	ISL2	ISL2	chr15:76629146-76634816	siKLF5	siNT	0.933646	1.32541	0.505486	1.46665	0.0141	0.0254094	yes
TOX3	TOX3	TOX3	chr16:52471917-52581714	siKLF5	siNT	9.94889	14.123	0.505437	2.93265	5e-05	0.000141705	yes
SETD1A	SETD1A	SETD1A	chr16:30968614-30995981	siKLF5	siNT	3.8584	5.47664	0.505286	2.87716	5e-05	0.000141705	yes
PACSIN2	PACSIN2	PACSIN2	chr22:43265771-43411184	siKLF5	siNT	40.3605	57.2815	0.505125	3.13275	5e-05	0.000141705	yes
DEGS2	DEGS2	DEGS2	chr14:100612752-100626012	siKLF5	siNT	42.2989	60.0178	0.50477	3.04003	5e-05	0.000141705	yes
NFE2L1	NFE2L1	NFE2L1	chr17:46125685-46138907	siKLF5	siNT	31.0847	44.0934	0.504359	3.14335	5e-05	0.000141705	yes
STRN	STRN	STRN	chr2:37064840-37193615	siKLF5	siNT	4.46653	6.33524	0.504246	3.07088	5e-05	0.000141705	yes
KANK2	KANK2	KANK2	chr19:11274942-11308243	siKLF5	siNT	5.2212	7.40519	0.504157	2.89927	5e-05	0.000141705	yes
LAS1L	LAS1L	LAS1L	chrX:64732461-64754686	siKLF5	siNT	30.3133	42.9795	0.503696	3.05108	5e-05	0.000141705	yes
NIPBL	NIPBL	NIPBL	chr5:36876860-37065921	siKLF5	siNT	3.90878	5.54144	0.503543	2.96797	5e-05	0.000141705	yes
PDPK1	PDPK1	PDPK1	chr16:2587964-2653191	siKLF5	siNT	6.2344	8.83734	0.503362	3.02719	5e-05	0.000141705	yes
UNC119B	UNC119B	UNC119B	chr12:121148237-121161443	siKLF5	siNT	9.84068	13.9485	0.503285	2.99981	5e-05	0.000141705	yes
INTS1	INTS1	INTS1	chr7:1509912-1544018	siKLF5	siNT	25.0045	35.438	0.50311	3.13564	5e-05	0.000141705	yes
DCTN1	DCTN1	DCTN1	chr2:74588280-74621008	siKLF5	siNT	28.3776	40.2126	0.502898	3.13093	5e-05	0.000141705	yes
RGP1	RGP1	RGP1	chr9:35749276-35754274	siKLF5	siNT	6.69866	9.4884	0.502293	2.47159	5e-05	0.000141705	yes
VCP	VCP	VCP	chr9:35056064-35072739	siKLF5	siNT	58.7608	83.2185	0.502051	3.13584	5e-05	0.000141705	yes
PKP4	PKP4	PKP4	chr2:159313475-159537940	siKLF5	siNT	21.0493	29.8037	0.50172	3.10423	5e-05	0.000141705	yes
SP5	SP5	SP5	chr2:171571856-171574498	siKLF5	siNT	2.55887	3.62268	0.501554	2.16903	5e-05	0.000141705	yes
LYPD3	LYPD3	LYPD3	chr19:43964945-43969831	siKLF5	siNT	23.4985	33.2649	0.501435	2.95341	5e-05	0.000141705	yes
ADAR	ADAR	ADAR	chr1:154554533-154600456	siKLF5	siNT	43.2279	61.1887	0.501303	3.12618	5e-05	0.000141705	yes
PPFIBP1	PPFIBP1	PPFIBP1	chr12:27677044-27848497	siKLF5	siNT	5.04132	7.13526	0.501164	2.91229	5e-05	0.000141705	yes
TNPO3	TNPO3	TNPO3	chr7:128594233-128695227	siKLF5	siNT	21.802	30.8546	0.501022	3.11881	5e-05	0.000141705	yes
DTX3L	DTX3L	DTX3L	chr3:122246759-122294049	siKLF5	siNT	3.79589	5.3702	0.500537	2.41901	5e-05	0.000141705	yes
SNX15	SNX15	SNX15	chr11:64781584-64808044	siKLF5	siNT	5.10052	7.21548	0.500451	1.29644	0.02585	0.0439285	yes
DGKD	DGKD	DGKD	chr2:234263152-234380743	siKLF5	siNT	6.06513	8.57924	0.500311	2.9557	5e-05	0.000141705	yes
OPLAH	OPLAH	OPLAH	chr8:145106166-145115584	siKLF5	siNT	5.20768	7.3655	0.500145	2.78598	5e-05	0.000141705	yes
LRWD1	LRWD1	LRWD1	chr7:102105389-102119381	siKLF5	siNT	10.9814	15.5304	0.500027	1.71697	0.004	0.00815198	yes
NABP1	NABP1	NABP1	chr2:192542797-192553248	siKLF5	siNT	2.55265	3.60987	0.499954	2.45294	5e-05	0.000141705	yes
LETM1	LETM1	LETM1	chr4:1813205-1857974	siKLF5	siNT	14.7413	20.8441	0.499774	3.06943	5e-05	0.000141705	yes
UTP15	UTP15	UTP15	chr5:72861597-72877794	siKLF5	siNT	2.92118	4.12926	0.49933	2.51412	5e-05	0.000141705	yes
BCAR1	BCAR1	BCAR1	chr16:75262927-75301951	siKLF5	siNT	34.4635	48.7115	0.499193	3.07597	5e-05	0.000141705	yes
REXO4	REXO4	REXO4	chr9:136243283-136324508	siKLF5	siNT	31.735	44.8458	0.498901	3.00087	5e-05	0.000141705	yes
ZNF784	ZNF784	ZNF784	chr19:56132106-56135941	siKLF5	siNT	2.10292	2.97121	0.498655	2.12325	0.0003	0.000760714	yes
GNL2	GNL2	GNL2	chr1:38022519-38061586	siKLF5	siNT	16.0378	22.6596	0.49864	2.82383	5e-05	0.000141705	yes
KIAA1609	KIAA1609	KIAA1609	chr16:84509965-84538288	siKLF5	siNT	3.59252	5.074	0.498127	2.73505	5e-05	0.000141705	yes
PLA2G4F	PLA2G4F	PLA2G4F	chr15:42433331-42448839	siKLF5	siNT	6.16384	8.7038	0.497817	2.78295	5e-05	0.000141705	yes
LONP1	LONP1	LONP1	chr19:5691844-5720463	siKLF5	siNT	27.0915	38.2457	0.497458	3.02992	5e-05	0.000141705	yes
RALBP1	RALBP1	RALBP1	chr18:9475529-9538106	siKLF5	siNT	66.4975	93.8738	0.497422	3.10512	5e-05	0.000141705	yes
RNPC3	RNPC3	RNPC3	chr1:104068577-104122149	siKLF5	siNT	1.72106	2.42952	0.497374	1.904	0.0013	0.00294014	yes
GSPT1	GSPT1	GSPT1	chr16:11961984-12010519	siKLF5	siNT	22.7774	32.1532	0.497364	3.10053	5e-05	0.000141705	yes
CACTIN	CACTIN	CACTIN	chr19:3607244-3626813	siKLF5	siNT	9.21724	13.0091	0.497109	2.82671	5e-05	0.000141705	yes
ATP1A3	ATP1A3	ATP1A3	chr19:42470733-42498428	siKLF5	siNT	9.19312	12.9741	0.497012	2.90964	5e-05	0.000141705	yes
DBNL	DBNL	DBNL	chr7:44084238-44101315	siKLF5	siNT	31.2309	44.0736	0.496943	3.03184	5e-05	0.000141705	yes
SF3B3	SF3B3	SF3B3	chr16:70557690-70611571	siKLF5	siNT	15.9889	22.5529	0.496242	3.09353	5e-05	0.000141705	yes
TRIM62	TRIM62	TRIM62	chr1:33611002-33647671	siKLF5	siNT	2.49358	3.51702	0.496138	2.44335	5e-05	0.000141705	yes
E2F1	E2F1	E2F1	chr20:32263291-32274210	siKLF5	siNT	12.1462	17.1275	0.495807	2.8836	5e-05	0.000141705	yes
PTK2B	PTK2B	PTK2B	chr8:27168998-27316908	siKLF5	siNT	8.94719	12.6113	0.495212	2.89916	5e-05	0.000141705	yes
PRDM16	PRDM16	PRDM16	chr1:2985741-3355185	siKLF5	siNT	2.14153	3.01733	0.494634	2.74279	5e-05	0.000141705	yes
STRBP	STRBP	STRBP	chr9:125883907-126030855	siKLF5	siNT	11.1257	15.6752	0.494586	3.0331	5e-05	0.000141705	yes
AHSA1	AHSA1	AHSA1	chr14:77924372-77935815	siKLF5	siNT	66.7601	94.053	0.494487	3.04115	5e-05	0.000141705	yes
ARF3	ARF3	ARF3	chr12:49329991-49351252	siKLF5	siNT	145.054	204.332	0.494324	3.05402	5e-05	0.000141705	yes
CAPZB	CAPZB	CAPZB	chr1:19665266-19812066	siKLF5	siNT	117.731	165.813	0.49407	3.06903	5e-05	0.000141705	yes
FAM50A	FAM50A	FAM50A	chrX:153672472-153679002	siKLF5	siNT	34.4822	48.5586	0.493875	2.93364	5e-05	0.000141705	yes
MCM3AP	MCM3AP	MCM3AP	chr21:47649157-47705236	siKLF5	siNT	13.8306	19.4751	0.493763	2.99068	5e-05	0.000141705	yes
CUL3	CUL3	CUL3	chr2:225334866-225450114	siKLF5	siNT	12.8435	18.0683	0.492424	3.03295	5e-05	0.000141705	yes
FMR1	FMR1	FMR1	chrX:146990948-147032647	siKLF5	siNT	8.84138	12.4368	0.492274	2.8932	5e-05	0.000141705	yes
SEC24C	SEC24C	SEC24C	chr10:75504130-75531933	siKLF5	siNT	17.7027	24.8998	0.492171	3.02794	5e-05	0.000141705	yes
GSE1	GSE1	GSE1	chr16:85645028-85709812	siKLF5	siNT	8.17445	11.497	0.492058	2.97973	5e-05	0.000141705	yes
POU2F1	POU2F1	POU2F1	chr1:167190065-167396582	siKLF5	siNT	3.49337	4.91313	0.492021	2.95197	5e-05	0.000141705	yes
NELFA	NELFA	NELFA	chr4:1984440-2010962	siKLF5	siNT	18.2072	25.6055	0.491942	2.92836	5e-05	0.000141705	yes
ANP32B	ANP32B	ANP32B	chr9:100745488-100778224	siKLF5	siNT	239.846	337.303	0.491938	3.05768	5e-05	0.000141705	yes
MGC27345	MGC27345	MGC27345	chr7:127937737-127947816	siKLF5	siNT	0.729812	1.02635	0.491926	2.31172	0.0001	0.000273198	yes
UNC45A	UNC45A	UNC45A	chr15:91473409-91497323	siKLF5	siNT	28.6105	40.234	0.491869	2.79822	5e-05	0.000141705	yes
KDM4B	KDM4B	KDM4B	chr19:4969123-5153608	siKLF5	siNT	3.2933	4.63111	0.491825	2.70923	5e-05	0.000141705	yes
VPS37B	VPS37B	VPS37B	chr12:123349874-123380712	siKLF5	siNT	34.8755	49.0419	0.491802	3.03264	5e-05	0.000141705	yes
ABLIM2	ABLIM2	ABLIM2	chr4:7967036-8160559	siKLF5	siNT	1.20611	1.6957	0.491526	1.87039	0.0011	0.00252595	yes
TTLL4	TTLL4	TTLL4	chr2:219575567-219620138	siKLF5	siNT	3.43029	4.82256	0.49147	2.67941	5e-05	0.000141705	yes
CRNKL1	CRNKL1	CRNKL1	chr20:20015011-20341346	siKLF5	siNT	9.76365	13.7261	0.491424	2.92417	5e-05	0.000141705	yes
RAPH1	RAPH1	RAPH1	chr2:204298538-204400058	siKLF5	siNT	2.94315	4.1372	0.491294	2.33303	0.0001	0.000273198	yes
TRAK1	TRAK1	TRAK1	chr3:42132745-42267382	siKLF5	siNT	25.1081	35.2943	0.491284	3.03087	5e-05	0.000141705	yes
OSBPL3	OSBPL3	OSBPL3	chr7:24836163-25019760	siKLF5	siNT	7.3396	10.314	0.490838	2.94958	5e-05	0.000141705	yes
SEC16A	SEC16A	SEC16A	chr9:139334547-139380519	siKLF5	siNT	34.7187	48.7785	0.490534	3.0524	5e-05	0.000141705	yes
ZCCHC6	ZCCHC6	ZCCHC6	chr9:88902647-88969402	siKLF5	siNT	7.68936	10.803	0.490497	2.92317	5e-05	0.000141705	yes
FANCA	FANCA	FANCA	chr16:89773540-89883065	siKLF5	siNT	7.04894	9.89813	0.48975	1.78329	0.00165	0.00365895	yes
CTDP1	CTDP1	CTDP1	chr18:77439800-77514510	siKLF5	siNT	3.19531	4.48532	0.489254	2.43054	5e-05	0.000141705	yes
ERC1	ERC1	ERC1	chr12:1100403-1605099	siKLF5	siNT	3.60149	5.0546	0.489003	2.84921	5e-05	0.000141705	yes
C2CD2L	C2CD2L	C2CD2L	chr11:118978092-118987827	siKLF5	siNT	3.69612	5.18674	0.488817	2.5277	5e-05	0.000141705	yes
FASN	FASN	FASN	chr17:80036213-80056106	siKLF5	siNT	26.2571	36.8458	0.488796	3.04841	5e-05	0.000141705	yes
PDE4DIP	PDE4DIP	PDE4DIP	chr1:144851423-145076186	siKLF5	siNT	4.19586	5.88726	0.488628	2.71312	5e-05	0.000141705	yes
WNK1	WNK1	WNK1	chr12:862088-1020618	siKLF5	siNT	15.9234	22.34	0.488481	3.02243	5e-05	0.000141705	yes
TRIM8	TRIM8	TRIM8	chr10:104404251-104418076	siKLF5	siNT	18.0377	25.3053	0.488423	2.92698	5e-05	0.000141705	yes
NOM1	NOM1	NOM1	chr7:156742416-156765876	siKLF5	siNT	3.91818	5.49675	0.488395	2.76695	5e-05	0.000141705	yes
HIRA	HIRA	HIRA	chr22:19318223-19419219	siKLF5	siNT	26.3472	36.9538	0.488071	3.0221	5e-05	0.000141705	yes
DHX8	DHX8	DHX8	chr17:41561333-41601680	siKLF5	siNT	9.06189	12.7093	0.487996	2.87943	5e-05	0.000141705	yes
LASP1	LASP1	LASP1	chr17:37026111-37078023	siKLF5	siNT	84.5432	118.563	0.487894	3.03804	5e-05	0.000141705	yes
BCL2L15	BCL2L15	BCL2L15	chr1:114356432-114447741	siKLF5	siNT	3.15862	4.42875	0.487603	2.21068	5e-05	0.000141705	yes
NUAK2	NUAK2	NUAK2	chr1:205271190-205290883	siKLF5	siNT	1.89716	2.65993	0.487547	2.19778	0.0002	0.000520576	yes
DOCK5	DOCK5	DOCK5	chr8:25042286-25270619	siKLF5	siNT	8.87824	12.4468	0.48743	2.97514	5e-05	0.000141705	yes
SUPT6H	SUPT6H	SUPT6H	chr17:26989301-27029249	siKLF5	siNT	17.8358	25.0046	0.487414	3.01825	5e-05	0.000141705	yes
KLC4	KLC4	KLC4	chr6:43027371-43042833	siKLF5	siNT	14.6363	20.517	0.48727	2.82777	5e-05	0.000141705	yes
HSP90AB1	HSP90AB1	HSP90AB1	chr6:44213902-44221625	siKLF5	siNT	1081.78	1516.35	0.487197	2.71421	5e-05	0.000141705	yes
CLASP1	CLASP1	CLASP1	chr2:122095351-122407052	siKLF5	siNT	3.25134	4.55452	0.486264	2.78392	5e-05	0.000141705	yes
SYT7	SYT7	SYT7	chr11:61281187-61348344	siKLF5	siNT	6.3501	8.89465	0.486158	2.87941	5e-05	0.000141705	yes
PPM1B	PPM1B	PPM1B	chr2:44395999-44461742	siKLF5	siNT	17.2481	24.159	0.486126	2.71794	5e-05	0.000141705	yes
SMURF2	SMURF2	SMURF2	chr17:62540734-62658386	siKLF5	siNT	4.20381	5.88686	0.4858	2.62231	5e-05	0.000141705	yes
DLGAP4	DLGAP4	DLGAP4	chr20:34995443-35157040	siKLF5	siNT	13.3899	18.7466	0.485482	2.86967	5e-05	0.000141705	yes
STRN4	STRN4	STRN4	chr19:47222767-47261832	siKLF5	siNT	43.5219	60.9322	0.485465	2.9048	5e-05	0.000141705	yes
JMJD6	JMJD6	JMJD6	chr17:74708913-74722881	siKLF5	siNT	9.97965	13.9675	0.485009	2.61946	5e-05	0.000141705	yes
EFCAB4B	EFCAB4B	EFCAB4B	chr12:3724493-3862366	siKLF5	siNT	7.73385	10.8235	0.484912	2.69965	5e-05	0.000141705	yes
SMARCA5	SMARCA5	SMARCA5	chr4:144434615-144478642	siKLF5	siNT	22.535	31.5372	0.484886	3.02616	5e-05	0.000141705	yes
SMTN	SMTN	SMTN	chr22:31477281-31500610	siKLF5	siNT	14.9185	20.8777	0.48486	2.89825	5e-05	0.000141705	yes
YBX2	YBX2	YBX2	chr17:7191570-7197876	siKLF5	siNT	1.16256	1.62673	0.484668	1.44718	0.01365	0.0246781	yes
DDX24	DDX24	DDX24	chr14:94517267-94547558	siKLF5	siNT	29.7748	41.6626	0.484659	2.98118	5e-05	0.000141705	yes
ZNF710	ZNF710	ZNF710	chr15:90544751-90625432	siKLF5	siNT	6.80029	9.51254	0.484234	2.80589	5e-05	0.000141705	yes
DBNDD2	DBNDD2	DBNDD2	chr20:43990576-44039250	siKLF5	siNT	18.955	26.5117	0.484049	1.84399	0.00185	0.0040614	yes
CTCF	CTCF	CTCF	chr16:67596309-67673088	siKLF5	siNT	17.8466	24.9535	0.483591	2.94841	5e-05	0.000141705	yes
ARFGAP2	ARFGAP2	ARFGAP2	chr11:46958250-47198676	siKLF5	siNT	24.9112	34.8253	0.48334	2.4649	5e-05	0.000141705	yes
HAUS5	HAUS5	HAUS5	chr19:36103645-36116251	siKLF5	siNT	3.7623	5.25915	0.483214	2.60992	5e-05	0.000141705	yes
PSMD2	PSMD2	PSMD2	chr3:184017021-184026840	siKLF5	siNT	106.347	148.619	0.482843	3.01173	5e-05	0.000141705	yes
YTHDC1	YTHDC1	YTHDC1	chr4_ctg9_hap1:6026-45746	siKLF5	siNT	10.3445	14.4509	0.482285	2.92241	5e-05	0.000141705	yes
ZMIZ2	ZMIZ2	ZMIZ2	chr7:44788529-44809479	siKLF5	siNT	14.9381	20.8614	0.481839	2.94344	5e-05	0.000141705	yes
PA2G4	PA2G4	PA2G4	chr12:56498102-56507694	siKLF5	siNT	84.8705	118.487	0.481395	3.0052	5e-05	0.000141705	yes
RHBDF2	RHBDF2	RHBDF2	chr17:74466974-74497509	siKLF5	siNT	8.3567	11.6657	0.481273	2.77288	5e-05	0.000141705	yes
PDCD6IP	PDCD6IP	PDCD6IP	chr3:33840062-33911199	siKLF5	siNT	17.0002	23.7314	0.481247	2.86928	5e-05	0.000141705	yes
GOT2	GOT2	GOT2	chr16:58741034-58768246	siKLF5	siNT	40.7058	56.8119	0.480959	2.97032	5e-05	0.000141705	yes
NPLOC4	NPLOC4	NPLOC4	chr17:79523912-79604138	siKLF5	siNT	21.9387	30.6158	0.480799	2.96701	5e-05	0.000141705	yes
SLC2A1	SLC2A1	SLC2A1	chr1:43391045-43449029	siKLF5	siNT	32.4629	45.2906	0.48042	2.9796	5e-05	0.000141705	yes
C10orf2	C10orf2	C10orf2	chr10:102747292-102754158	siKLF5	siNT	6.89451	9.61884	0.480414	2.34844	5e-05	0.000141705	yes
GSG2	GSG2	GSG2	chr17:3617918-3704537	siKLF5	siNT	3.86222	5.3881	0.480345	1.77419	0.0041	0.0083309	yes
BCL2L2-PABPN1	BCL2L2-PABPN1	BCL2L2-PABPN1	chr14:23775970-23795394	siKLF5	siNT	15.9968	22.3147	0.480207	1.96816	0.0006	0.00144989	yes
CHSY1	CHSY1	CHSY1	chr15:101715927-101792137	siKLF5	siNT	6.69838	9.34243	0.479986	2.78388	5e-05	0.000141705	yes
SMOX	SMOX	SMOX	chr20:4129425-4168394	siKLF5	siNT	4.32123	6.02685	0.479962	2.22395	0.0001	0.000273198	yes
RBPMS	RBPMS	RBPMS	chr8:30239634-30429734	siKLF5	siNT	20.4343	28.4881	0.479365	2.59783	5e-05	0.000141705	yes
SHROOM3	SHROOM3	SHROOM3	chr4:77356252-77704405	siKLF5	siNT	13.8683	19.3322	0.479216	2.98856	5e-05	0.000141705	yes
CERK	CERK	CERK	chr22:47080306-47134152	siKLF5	siNT	8.08722	11.2717	0.478984	2.81394	5e-05	0.000141705	yes
CTBP2	CTBP2	CTBP2	chr10:126676417-126849624	siKLF5	siNT	36.3903	50.713	0.478804	2.97716	5e-05	0.000141705	yes
SRGAP2	SRGAP2	SRGAP2	chr1:206516199-206637783	siKLF5	siNT	2.70699	3.77128	0.478365	2.40321	5e-05	0.000141705	yes
HBEGF	HBEGF	HBEGF	chr5:139712427-139726188	siKLF5	siNT	2.46407	3.43196	0.477992	2.09571	0.0003	0.000760714	yes
IK	IK	IK	chr5:140027383-140042065	siKLF5	siNT	33.2633	46.325	0.477862	2.89631	5e-05	0.000141705	yes
CSDA	CSDA	CSDA	chr12:10851675-10875953	siKLF5	siNT	57.4425	79.9639	0.47723	2.93798	5e-05	0.000141705	yes
ARL10	ARL10	ARL10	chr5:175792501-175800503	siKLF5	siNT	0.808917	1.12598	0.477116	1.48732	0.011	0.020269	yes
PROSER1	PROSER1	PROSER1	chr13:39584001-39612213	siKLF5	siNT	13.7887	19.1933	0.477115	2.91686	5e-05	0.000141705	yes
SNAPC2	SNAPC2	SNAPC2	chr19:7985193-7988136	siKLF5	siNT	7.31375	10.1799	0.477047	2.36004	0.0001	0.000273198	yes
ODF2	ODF2	ODF2	chr9:131217433-131263571	siKLF5	siNT	22.0406	30.6732	0.476816	2.76051	5e-05	0.000141705	yes
CBLC	CBLC	CBLC	chr19:45281125-45303903	siKLF5	siNT	19.2542	26.7936	0.476715	2.73747	5e-05	0.000141705	yes
DUSP6	DUSP6	DUSP6	chr12:89741836-89746296	siKLF5	siNT	34.3287	47.7692	0.476668	2.95037	5e-05	0.000141705	yes
GRHL1	GRHL1	GRHL1	chr2:10091791-10142412	siKLF5	siNT	1.24214	1.72829	0.476521	2.02049	0.0007	0.00167213	yes
KIF1C	KIF1C	KIF1C	chr17:4901242-4931694	siKLF5	siNT	21.5918	30.0356	0.476188	2.97227	5e-05	0.000141705	yes
SGSM1	SGSM1	SGSM1	chr22:25202135-25322813	siKLF5	siNT	0.744917	1.03606	0.475951	2.01699	0.0005	0.00122389	yes
MICALL1	MICALL1	MICALL1	chr22:38302154-38338465	siKLF5	siNT	11.3209	15.743	0.475724	2.85789	5e-05	0.000141705	yes
PARN	PARN	PARN	chr16:14529556-14724128	siKLF5	siNT	9.47561	13.1762	0.475647	2.73947	5e-05	0.000141705	yes
CPSF7	CPSF7	CPSF7	chr11:61170119-61197464	siKLF5	siNT	16.2362	22.5771	0.475644	2.89348	5e-05	0.000141705	yes
PLEK2	PLEK2	PLEK2	chr14:67853699-67878828	siKLF5	siNT	14.2019	19.7469	0.475543	2.61933	5e-05	0.000141705	yes
FUT3	FUT3	FUT3	chr19:5842898-5851485	siKLF5	siNT	10.9313	15.1966	0.475292	2.65427	5e-05	0.000141705	yes
IRF1	IRF1	IRF1	chr5:131817300-131826465	siKLF5	siNT	2.95751	4.10926	0.474495	2.37954	5e-05	0.000141705	yes
CABIN1	CABIN1	CABIN1	chr22:24407764-24574596	siKLF5	siNT	11.7339	16.3029	0.474444	2.89923	5e-05	0.000141705	yes
AMIGO1	AMIGO1	AMIGO1	chr1:110049445-110052336	siKLF5	siNT	0.798757	1.10926	0.473772	1.48624	0.0116	0.021282	yes
USP31	USP31	USP31	chr16:23072727-23160591	siKLF5	siNT	1.22963	1.70752	0.473678	2.48943	0.0001	0.000273198	yes
AXIN1	AXIN1	AXIN1	chr16:337439-402676	siKLF5	siNT	11.5238	16.0024	0.473665	2.80008	5e-05	0.000141705	yes
SYT1	SYT1	SYT1	chr12:79257772-79845788	siKLF5	siNT	0.738386	1.02531	0.473614	1.84766	0.0012	0.00273614	yes
AAMP	AAMP	AAMP	chr2:219128851-219134893	siKLF5	siNT	58.3698	81.0491	0.473573	2.92578	5e-05	0.000141705	yes
ARHGEF35	ARHGEF35	ARHGEF35	chr7:143883175-143892791	siKLF5	siNT	4.20038	5.83215	0.473509	2.35522	0.0001	0.000273198	yes
IMMT	IMMT	IMMT	chr2:86371054-86422893	siKLF5	siNT	55.4274	76.954	0.473397	2.94366	5e-05	0.000141705	yes
TMEM2	TMEM2	TMEM2	chr9:74298281-74383800	siKLF5	siNT	72.3751	100.473	0.473236	2.93141	5e-05	0.000141705	yes
WDR46	WDR46	WDR46	chr6_qbl_hap6:4479118-4489547	siKLF5	siNT	13.8887	19.2804	0.473218	2.75618	5e-05	0.000141705	yes
ZNF598	ZNF598	ZNF598	chr16:2047652-2059822	siKLF5	siNT	14.2369	19.7619	0.473081	2.82911	5e-05	0.000141705	yes
PPARGC1B	PPARGC1B	PPARGC1B	chr5:149109814-149234585	siKLF5	siNT	1.15026	1.59655	0.472997	2.464	5e-05	0.000141705	yes
LLGL2	LLGL2	LLGL2	chr17:73521782-73571290	siKLF5	siNT	66.822	92.7457	0.472958	2.55675	5e-05	0.000141705	yes
SDC1	SDC1	SDC1	chr2:20400557-20425194	siKLF5	siNT	105.645	146.586	0.472525	2.94407	5e-05	0.000141705	yes
MED25	MED25	MED25	chr19:50321535-50340237	siKLF5	siNT	18.596	25.7995	0.472355	2.80408	5e-05	0.000141705	yes
SNAPC4	SNAPC4	SNAPC4	chr9:139270028-139292889	siKLF5	siNT	4.15645	5.76654	0.472354	2.60952	5e-05	0.000141705	yes
PLEKHA6	PLEKHA6	PLEKHA6	chr1:204187978-204329057	siKLF5	siNT	12.1602	16.8698	0.472274	2.90937	5e-05	0.000141705	yes
TAX1BP3	TAX1BP3	TAX1BP3	chr17:3539761-3599698	siKLF5	siNT	43.1371	59.8393	0.472165	2.15027	0.00045	0.00111013	yes
JAK1	JAK1	JAK1	chr1:65210777-65432187	siKLF5	siNT	21.3285	29.5832	0.471998	2.67144	5e-05	0.000141705	yes
DHX29	DHX29	DHX29	chr5:54552072-54603521	siKLF5	siNT	3.90709	5.41881	0.471881	2.57112	5e-05	0.000141705	yes
MKL1	MKL1	MKL1	chr22:40766594-41032690	siKLF5	siNT	5.79848	8.04064	0.471637	1.6682	0.00385	0.00787503	yes
EYA3	EYA3	EYA3	chr1:28296854-28415148	siKLF5	siNT	3.87837	5.3777	0.471538	2.66818	5e-05	0.000141705	yes
SEC61A1	SEC61A1	SEC61A1	chr3:127771211-127790526	siKLF5	siNT	75.7864	105.079	0.471461	2.94363	5e-05	0.000141705	yes
RBL1	RBL1	RBL1	chr20:35626177-35724410	siKLF5	siNT	6.79681	9.42236	0.471232	2.69623	5e-05	0.000141705	yes
STK32C	STK32C	STK32C	chr10:134020995-134121477	siKLF5	siNT	4.06544	5.63443	0.470859	2.24193	0.0001	0.000273198	yes
FBLIM1	FBLIM1	FBLIM1	chr1:16085254-16113084	siKLF5	siNT	16.9884	23.5423	0.470707	2.82784	5e-05	0.000141705	yes
APBB1	APBB1	APBB1	chr11:6416354-6440644	siKLF5	siNT	1.67611	2.32263	0.470642	1.83298	0.0008	0.0018886	yes
MLXIP	MLXIP	MLXIP	chr12:122516651-122628967	siKLF5	siNT	8.522	11.8078	0.470477	2.8137	5e-05	0.000141705	yes
SHC1	SHC1	SHC1	chr1:154934773-154946959	siKLF5	siNT	19.3651	26.8257	0.470159	2.85727	5e-05	0.000141705	yes
HOXC9	HOXC9	HOXC9	chr12:54393876-54397120	siKLF5	siNT	1.11284	1.54141	0.470007	1.35393	0.0197	0.0343763	yes
DDB1	DDB1	DDB1	chr11:61066918-61136975	siKLF5	siNT	37.5283	51.9764	0.469879	2.46513	5e-05	0.000141705	yes
TNRC6C	TNRC6C	TNRC6C	chr17:76000317-76107880	siKLF5	siNT	0.904817	1.25311	0.469811	1.81091	0.0023	0.00494502	yes
PAQR4	PAQR4	PAQR4	chr16:3019341-3030540	siKLF5	siNT	19.123	26.4836	0.469791	2.25655	0.0001	0.000273198	yes
TAOK3	TAOK3	TAOK3	chr12:118587605-118810750	siKLF5	siNT	4.07733	5.64669	0.469781	2.56922	5e-05	0.000141705	yes
RNPEPL1	RNPEPL1	RNPEPL1	chr2:241508003-241518149	siKLF5	siNT	22.6328	31.3429	0.469722	2.86077	5e-05	0.000141705	yes
PPP1R10	PPP1R10	PPP1R10	chr6_ssto_hap7:1900455-1917363	siKLF5	siNT	8.45624	11.7081	0.469424	2.77572	5e-05	0.000141705	yes
DHX33	DHX33	DHX33	chr17:5344231-5372380	siKLF5	siNT	6.01942	8.33407	0.469396	2.74411	5e-05	0.000141705	yes
CIZ1	CIZ1	CIZ1	chr9:130928343-131017527	siKLF5	siNT	48.6032	67.2818	0.469165	2.8601	5e-05	0.000141705	yes
RRP1	RRP1	RRP1	chr21:45209417-45223983	siKLF5	siNT	29.7062	41.1049	0.468548	2.81456	5e-05	0.000141705	yes
CTDNEP1	CTDNEP1	CTDNEP1	chr17:7146905-7155259	siKLF5	siNT	39.9687	55.2948	0.468272	2.86298	5e-05	0.000141705	yes
NCAPD2	NCAPD2	NCAPD2	chr12:6603297-6641132	siKLF5	siNT	46.8242	64.7777	0.468243	2.92264	5e-05	0.000141705	yes
BAZ2A	BAZ2A	BAZ2A	chr12:56915608-57030163	siKLF5	siNT	9.4027	13.0068	0.468124	2.86623	5e-05	0.000141705	yes
GTPBP1	GTPBP1	GTPBP1	chr22:39101806-39129592	siKLF5	siNT	9.0505	12.5174	0.467871	2.796	5e-05	0.000141705	yes
ZSCAN22	ZSCAN22	ZSCAN22	chr19:58838384-58853712	siKLF5	siNT	0.87108	1.20459	0.46766	1.9385	0.001	0.00231362	yes
DNAJC13	DNAJC13	DNAJC13	chr3:132136552-132257876	siKLF5	siNT	10.8088	14.9457	0.46753	2.87389	5e-05	0.000141705	yes
CLOCK	CLOCK	CLOCK	chr4:56294067-56413076	siKLF5	siNT	6.91844	9.56638	0.467526	2.8661	5e-05	0.000141705	yes
SAP130	SAP130	SAP130	chr2:128698790-128784869	siKLF5	siNT	8.40666	11.6239	0.46749	2.73759	5e-05	0.000141705	yes
PDS5B	PDS5B	PDS5B	chr13:33160563-33352158	siKLF5	siNT	10.4354	14.4284	0.467424	2.86705	5e-05	0.000141705	yes
PSMD12	PSMD12	PSMD12	chr17:65336618-65362721	siKLF5	siNT	37.1721	51.3952	0.467415	2.82828	5e-05	0.000141705	yes
UAP1L1	UAP1L1	UAP1L1	chr9:139971952-139978990	siKLF5	siNT	12.0165	16.6142	0.467406	2.76569	5e-05	0.000141705	yes
GINS4	GINS4	GINS4	chr8:41386724-41402565	siKLF5	siNT	6.70475	9.26955	0.467315	2.66494	5e-05	0.000141705	yes
CCAR1	CCAR1	CCAR1	chr10:70480970-70551309	siKLF5	siNT	18.6416	25.7696	0.467141	2.84828	5e-05	0.000141705	yes
CCDC137	CCDC137	CCDC137	chr17:79633760-79640936	siKLF5	siNT	12.346	17.0618	0.466735	2.64769	5e-05	0.000141705	yes
DGKH	DGKH	DGKH	chr13:42614171-42803891	siKLF5	siNT	2.07181	2.8629	0.466584	2.24147	0.0001	0.000273198	yes
SPTAN1	SPTAN1	SPTAN1	chr9:131314836-131419129	siKLF5	siNT	37.5507	51.8871	0.466537	2.39527	5e-05	0.000141705	yes
MED26	MED26	MED26	chr19:16685717-16739015	siKLF5	siNT	3.69086	5.09942	0.466377	2.38375	5e-05	0.000141705	yes
KCNQ1	KCNQ1	KCNQ1	chr11:2466220-2870340	siKLF5	siNT	21.2699	29.3778	0.465914	2.81356	5e-05	0.000141705	yes
GATAD2B	GATAD2B	GATAD2B	chr1:153777202-153895451	siKLF5	siNT	5.61538	7.75587	0.465903	2.77278	5e-05	0.000141705	yes
NFKBIL1	NFKBIL1	NFKBIL1	chr6_ssto_hap7:2845432-2857408	siKLF5	siNT	3.63355	5.01789	0.465701	1.99849	0.0004	0.000994575	yes
CABLES1	CABLES1	CABLES1	chr18:20714527-20840434	siKLF5	siNT	16.9235	23.366	0.465382	2.81501	5e-05	0.000141705	yes
FUBP3	FUBP3	FUBP3	chr9:133454959-133513739	siKLF5	siNT	32.9095	45.4314	0.465185	2.87537	5e-05	0.000141705	yes
EPB41L2	EPB41L2	EPB41L2	chr6:131160487-131384462	siKLF5	siNT	40.9918	56.5813	0.464989	2.87897	5e-05	0.000141705	yes
GIPC1	GIPC1	GIPC1	chr19:14588570-14606961	siKLF5	siNT	132.833	183.346	0.46495	2.89482	5e-05	0.000141705	yes
CTDSP2	CTDSP2	CTDSP2	chr12:58213709-58240747	siKLF5	siNT	14.0666	19.4119	0.464665	2.83931	5e-05	0.000141705	yes
UBE2H	UBE2H	UBE2H	chr7:129470572-129592800	siKLF5	siNT	22.3641	30.8583	0.464477	2.88723	5e-05	0.000141705	yes
BLOC1S3	BLOC1S3	BLOC1S3	chr19:45682002-45685058	siKLF5	siNT	6.65679	9.18509	0.464468	2.5166	5e-05	0.000141705	yes
ARID3B	ARID3B	ARID3B	chr15:74833547-74890472	siKLF5	siNT	1.0492	1.44761	0.464384	2.00854	0.00075	0.00178152	yes
SRSF1	SRSF1	SRSF1	chr17:56078279-56084707	siKLF5	siNT	48.4193	66.8	0.464266	2.89227	5e-05	0.000141705	yes
LOC100134229	LOC100134229	LOC100134229	chr7:139877060-139879440	siKLF5	siNT	4.46418	6.15851	0.464186	2.32028	5e-05	0.000141705	yes
WBP11	WBP11	WBP11	chr12:14939411-14956401	siKLF5	siNT	30.376	41.9035	0.46414	2.84737	5e-05	0.000141705	yes
ZNF384	ZNF384	ZNF384	chr12:6775642-6798738	siKLF5	siNT	11.428	15.7602	0.46371	2.71163	5e-05	0.000141705	yes
USB1	USB1	USB1	chr16:58035276-58055527	siKLF5	siNT	17.6406	24.3245	0.463512	2.73988	5e-05	0.000141705	yes
RNF157	RNF157	RNF157	chr17:74132414-74236390	siKLF5	siNT	2.40075	3.30919	0.462995	2.37503	5e-05	0.000141705	yes
ARHGEF10L	ARHGEF10L	ARHGEF10L	chr1:17866329-18024370	siKLF5	siNT	6.72924	9.27436	0.462804	2.65987	5e-05	0.000141705	yes
SRBD1	SRBD1	SRBD1	chr2:45615818-45838433	siKLF5	siNT	5.36083	7.3875	0.46263	2.55945	5e-05	0.000141705	yes
TCF7L2	TCF7L2	TCF7L2	chr10:114710008-114927436	siKLF5	siNT	7.59136	10.4585	0.46225	2.6691	5e-05	0.000141705	yes
MAP7D3	MAP7D3	MAP7D3	chrX:135295378-135338641	siKLF5	siNT	1.8885	2.60114	0.461903	2.23032	5e-05	0.000141705	yes
SLC44A4	SLC44A4	SLC44A4	chr6_ssto_hap7:3163717-3179566	siKLF5	siNT	36.8826	50.7934	0.4617	2.81861	5e-05	0.000141705	yes
FAM117B	FAM117B	FAM117B	chr2:203499900-203634480	siKLF5	siNT	2.8103	3.87003	0.461618	2.4966	5e-05	0.000141705	yes
ERCC5	ERCC5	ERCC5	chr13:103436630-103528351	siKLF5	siNT	11.4183	15.7232	0.461549	1.5706	0.01225	0.0223776	yes
SLC44A5	SLC44A5	SLC44A5	chr1:75667815-76076799	siKLF5	siNT	0.909148	1.25175	0.461361	1.72086	0.0039	0.00796934	yes
NBEAL1	NBEAL1	NBEAL1	chr2:203879601-204082717	siKLF5	siNT	0.865448	1.19138	0.461114	2.19451	0.0003	0.000760714	yes
CCDC94	CCDC94	CCDC94	chr19:4247110-4269085	siKLF5	siNT	7.83754	10.789	0.461084	2.28462	0.00015	0.000398712	yes
MAEA	MAEA	MAEA	chr4:1283671-1333925	siKLF5	siNT	32.4905	44.7117	0.460637	2.80161	5e-05	0.000141705	yes
PLAA	PLAA	PLAA	chr9:26903367-27062931	siKLF5	siNT	6.81215	9.3714	0.460154	2.48846	0.0001	0.000273198	yes
SH3BP2	SH3BP2	SH3BP2	chr4:2794749-2842823	siKLF5	siNT	3.51335	4.83327	0.460153	2.66286	5e-05	0.000141705	yes
IARS	IARS	IARS	chr9:94972489-95056038	siKLF5	siNT	115.221	158.494	0.460019	2.83849	5e-05	0.000141705	yes
NUP93	NUP93	NUP93	chr16:56764016-56878861	siKLF5	siNT	16.2012	22.2826	0.459814	2.74884	5e-05	0.000141705	yes
AKT1S1	AKT1S1	AKT1S1	chr19:50372296-50380644	siKLF5	siNT	46.0077	63.265	0.459532	2.78624	5e-05	0.000141705	yes
MICALL2	MICALL2	MICALL2	chr7:1473994-1499109	siKLF5	siNT	19.6093	26.9592	0.459239	2.7806	5e-05	0.000141705	yes
TFAP4	TFAP4	TFAP4	chr16:4307186-4323001	siKLF5	siNT	9.21551	12.6694	0.459207	2.52564	5e-05	0.000141705	yes
GMEB1	GMEB1	GMEB1	chr1:28995239-29042115	siKLF5	siNT	3.59136	4.93689	0.459071	2.2648	5e-05	0.000141705	yes
FANCE	FANCE	FANCE	chr6:35420137-35434881	siKLF5	siNT	2.75865	3.79205	0.459016	2.10107	0.00015	0.000398712	yes
PLXNB2	PLXNB2	PLXNB2	chr22:50713407-50746001	siKLF5	siNT	40.009	54.9921	0.4589	2.86527	5e-05	0.000141705	yes
PPP1R13B	PPP1R13B	PPP1R13B	chr14:104200087-104313927	siKLF5	siNT	5.38777	7.40463	0.458739	2.62435	5e-05	0.000141705	yes
BCL9L	BCL9L	BCL9L	chr11:118754474-118781613	siKLF5	siNT	13.1652	18.0933	0.458729	2.83505	5e-05	0.000141705	yes
HEATR2	HEATR2	HEATR2	chr7:588833-826116	siKLF5	siNT	9.56627	13.1451	0.458495	1.80784	0.00135	0.00304202	yes
PPP2R5E	PPP2R5E	PPP2R5E	chr14:63841354-64010079	siKLF5	siNT	13.2586	18.217	0.458363	2.7323	5e-05	0.000141705	yes
KDM1B	KDM1B	KDM1B	chr6:18155618-18224084	siKLF5	siNT	9.26587	12.7277	0.457976	2.68696	5e-05	0.000141705	yes
KALRN	KALRN	KALRN	chr3:123813557-124440036	siKLF5	siNT	15.8	21.6968	0.457559	2.81892	5e-05	0.000141705	yes
FBRS	FBRS	FBRS	chr16:30675777-30682131	siKLF5	siNT	5.90177	8.10407	0.457499	2.46103	5e-05	0.000141705	yes
AKR1B1	AKR1B1	AKR1B1	chr7:134127106-134143888	siKLF5	siNT	7.29868	10.0213	0.457359	2.23571	0.0001	0.000273198	yes
AKAP8L	AKAP8L	AKAP8L	chr19:15490858-15529833	siKLF5	siNT	14.2162	19.5167	0.457172	2.63204	5e-05	0.000141705	yes
SUGP1	SUGP1	SUGP1	chr19:19387321-19431321	siKLF5	siNT	11.6382	15.9773	0.457159	2.57453	5e-05	0.000141705	yes
SLC1A1	SLC1A1	SLC1A1	chr9:4490426-4587469	siKLF5	siNT	3.36668	4.62184	0.457141	2.36653	0.0001	0.000273198	yes
TRIM7	TRIM7	TRIM7	chr5:180620923-180632177	siKLF5	siNT	11.7721	16.1587	0.456941	2.17786	0.0001	0.000273198	yes
KCNK6	KCNK6	KCNK6	chr19:38810483-38819649	siKLF5	siNT	8.86607	12.1689	0.456832	2.57088	5e-05	0.000141705	yes
PRPF31	PRPF31	PRPF31	chr19:54610319-54635150	siKLF5	siNT	36.1141	49.5621	0.456674	2.34134	5e-05	0.000141705	yes
CHD1	CHD1	CHD1	chr5:98190907-98262238	siKLF5	siNT	2.91136	3.99413	0.456187	2.51226	5e-05	0.000141705	yes
IRAK1	IRAK1	IRAK1	chrX:153275956-153285342	siKLF5	siNT	95.9578	131.64	0.45613	2.84044	5e-05	0.000141705	yes
BRD3	BRD3	BRD3	chr9:136890560-136933141	siKLF5	siNT	13.0919	17.9572	0.455889	2.31746	0.00015	0.000398712	yes
MAP3K4	MAP3K4	MAP3K4	chr6:161412821-161538417	siKLF5	siNT	4.02321	5.51774	0.455728	2.5499	5e-05	0.000141705	yes
ZNF282	ZNF282	ZNF282	chr7:148892576-148923339	siKLF5	siNT	9.43631	12.9416	0.455726	2.66747	5e-05	0.000141705	yes
SLC35B4	SLC35B4	SLC35B4	chr7:133974089-134001827	siKLF5	siNT	2.78047	3.8131	0.455636	2.51386	5e-05	0.000141705	yes
CYR61	CYR61	CYR61	chr1:86046443-86049648	siKLF5	siNT	1.46936	2.01493	0.455539	1.78098	0.0021	0.00455569	yes
IRGQ	IRGQ	IRGQ	chr19:44088518-44100287	siKLF5	siNT	1.66818	2.28748	0.455481	2.4654	5e-05	0.000141705	yes
RUVBL2	RUVBL2	RUVBL2	chr19:49497155-49519182	siKLF5	siNT	109.686	150.386	0.45528	2.83487	5e-05	0.000141705	yes
PLEKHG1	PLEKHG1	PLEKHG1	chr6:150920998-151164799	siKLF5	siNT	2.58841	3.54794	0.454916	2.50609	5e-05	0.000141705	yes
ASCC2	ASCC2	ASCC2	chr22:30184596-30234293	siKLF5	siNT	19.3579	26.528	0.454597	2.75075	5e-05	0.000141705	yes
C2orf70	C2orf70	C2orf70	chr2:26785480-26802395	siKLF5	siNT	9.33092	12.7864	0.45452	1.973	0.0007	0.00167213	yes
DDX10	DDX10	DDX10	chr11:108535815-108811648	siKLF5	siNT	14.3904	19.717	0.454328	2.70749	5e-05	0.000141705	yes
SLC6A8	SLC6A8	SLC6A8	chrX:152953751-152962048	siKLF5	siNT	16.3801	22.4414	0.454221	2.72961	5e-05	0.000141705	yes
KCTD17	KCTD17	KCTD17	chr22:37447778-37459430	siKLF5	siNT	4.56685	6.25561	0.453953	2.09906	0.0001	0.000273198	yes
HNRNPA3	HNRNPA3	HNRNPA3	chr2:178077421-178088685	siKLF5	siNT	57.2249	78.3704	0.453665	2.81844	5e-05	0.000141705	yes
ARFGAP1	ARFGAP1	ARFGAP1	chr20:61904164-61921142	siKLF5	siNT	17.336	23.7398	0.453534	2.74113	5e-05	0.000141705	yes
TRIM56	TRIM56	TRIM56	chr7:100728785-100733889	siKLF5	siNT	3.49269	4.78223	0.453347	2.33792	0.0001	0.000273198	yes
RTKN	RTKN	RTKN	chr2:74652987-74669060	siKLF5	siNT	28.8976	39.5661	0.453314	2.75075	5e-05	0.000141705	yes
CCNK	CCNK	CCNK	chr14:99947738-100070727	siKLF5	siNT	25.3764	34.741	0.453153	1.84413	0.00145	0.00325006	yes
RCAN1	RCAN1	RCAN1	chr21:35888783-35987382	siKLF5	siNT	16.0245	21.9315	0.452725	2.65338	5e-05	0.000141705	yes
TPM3	TPM3	TPM3	chr1:154127779-154164609	siKLF5	siNT	292.254	399.889	0.452378	2.73876	5e-05	0.000141705	yes
WAPAL	WAPAL	WAPAL	chr10:88195012-88281541	siKLF5	siNT	8.90693	12.1868	0.45232	2.73592	5e-05	0.000141705	yes
PIK3R4	PIK3R4	PIK3R4	chr3:130397777-130465696	siKLF5	siNT	6.15744	8.42431	0.452227	2.62625	5e-05	0.000141705	yes
GSK3A	GSK3A	GSK3A	chr19:42734337-42746736	siKLF5	siNT	49.0405	67.085	0.452018	2.79479	5e-05	0.000141705	yes
SLC44A2	SLC44A2	SLC44A2	chr19:10713120-10755235	siKLF5	siNT	34.7642	47.5458	0.451717	2.81986	5e-05	0.000141705	yes
TMEM39B	TMEM39B	TMEM39B	chr1:32538502-32568467	siKLF5	siNT	7.53572	10.3057	0.451622	2.34773	5e-05	0.000141705	yes
GEMIN4	GEMIN4	GEMIN4	chr17:647660-655501	siKLF5	siNT	12.5305	17.1351	0.451515	2.69522	5e-05	0.000141705	yes
PRPF4B	PRPF4B	PRPF4B	chr6:4021568-4065217	siKLF5	siNT	7.25183	9.9162	0.451442	2.72497	5e-05	0.000141705	yes
HSD17B4	HSD17B4	HSD17B4	chr5:118788137-118878030	siKLF5	siNT	51.9372	71.0159	0.451375	2.80554	5e-05	0.000141705	yes
CLUH	CLUH	CLUH	chr17:2592679-2614927	siKLF5	siNT	24.1181	32.9757	0.451285	2.80067	5e-05	0.000141705	yes
TBC1D10B	TBC1D10B	TBC1D10B	chr16:30368421-30381522	siKLF5	siNT	16.5419	22.6168	0.451272	2.71577	5e-05	0.000141705	yes
OTUD4	OTUD4	OTUD4	chr4:146054801-146100832	siKLF5	siNT	8.01149	10.9491	0.450666	2.316	5e-05	0.000141705	yes
GPC1	GPC1	GPC1	chr2:241375114-241407495	siKLF5	siNT	6.82782	9.3291	0.450313	2.54747	5e-05	0.000141705	yes
CTSB	CTSB	CTSB	chr8:11700033-11725646	siKLF5	siNT	274.553	375.094	0.450168	2.71803	5e-05	0.000141705	yes
ZGPAT	ZGPAT	ZGPAT	chr20:62289162-62367494	siKLF5	siNT	13.5168	18.465	0.450043	1.65781	0.00475	0.00953026	yes
TRIP12	TRIP12	TRIP12	chr2:230631929-230786655	siKLF5	siNT	16.2286	22.1662	0.449821	2.78469	5e-05	0.000141705	yes
BRI3BP	BRI3BP	BRI3BP	chr12:125478193-125510349	siKLF5	siNT	17.7106	24.1878	0.449667	2.48614	5e-05	0.000141705	yes
DOCK9	DOCK9	DOCK9	chr13:99445740-99738660	siKLF5	siNT	12.2669	16.7531	0.449663	2.73347	5e-05	0.000141705	yes
SREK1	SREK1	SREK1	chr5:65440045-65479444	siKLF5	siNT	3.33686	4.55628	0.449365	2.39258	5e-05	0.000141705	yes
C3orf37	C3orf37	C3orf37	chr3:128997683-129024135	siKLF5	siNT	27.1165	37.019	0.449095	2.67463	5e-05	0.000141705	yes
HDAC4	HDAC4	HDAC4	chr2:239969863-240322643	siKLF5	siNT	3.71652	5.07202	0.448609	2.62568	5e-05	0.000141705	yes
ANKRD11	ANKRD11	ANKRD11	chr16:89334028-89556969	siKLF5	siNT	9.37446	12.7889	0.448088	1.93934	0.0006	0.00144989	yes
NFKB2	NFKB2	NFKB2	chr10:104153866-104162286	siKLF5	siNT	5.16029	7.0398	0.448083	2.38421	0.00015	0.000398712	yes
C9orf114	C9orf114	C9orf114	chr9:131580778-131592100	siKLF5	siNT	11.7784	16.0667	0.447923	2.19435	0.0002	0.000520576	yes
NACC1	NACC1	NACC1	chr19:13229101-13251961	siKLF5	siNT	18.9368	25.8308	0.447899	2.75169	5e-05	0.000141705	yes
TRMT44	TRMT44	TRMT44	chr4:8442531-8478282	siKLF5	siNT	2.18294	2.97648	0.447336	2.00583	0.0005	0.00122389	yes
RAB8A	RAB8A	RAB8A	chr19:16222489-16244445	siKLF5	siNT	53.8166	73.3748	0.447233	2.77099	5e-05	0.000141705	yes
SOX9	SOX9	SOX9	chr17:70117160-70122560	siKLF5	siNT	55.8988	76.2126	0.447212	2.79371	5e-05	0.000141705	yes
PPP1R11	PPP1R11	PPP1R11	chr6_ssto_hap7:1365371-1374068	siKLF5	siNT	23.549	32.1024	0.447018	2.42342	5e-05	0.000141705	yes
SH3PXD2B	SH3PXD2B	SH3PXD2B	chr5:171760502-171881527	siKLF5	siNT	4.64033	6.32552	0.446955	2.62522	5e-05	0.000141705	yes
CLEC16A	CLEC16A	CLEC16A	chr16:11038344-11276046	siKLF5	siNT	4.09746	5.58509	0.44685	2.21417	0.00015	0.000398712	yes
GAS6	GAS6	GAS6	chr13:114518582-114567046	siKLF5	siNT	13.5823	18.5127	0.446793	2.55342	5e-05	0.000141705	yes
CHD7	CHD7	CHD7	chr8:61591323-61780586	siKLF5	siNT	4.28441	5.83946	0.44674	2.68702	5e-05	0.000141705	yes
SND1	SND1	SND1	chr7:127292201-127732659	siKLF5	siNT	80.7086	109.984	0.446493	2.77772	5e-05	0.000141705	yes
RACGAP1	RACGAP1	RACGAP1	chr12:50382944-50419307	siKLF5	siNT	34.7396	47.336	0.446356	2.77336	5e-05	0.000141705	yes
SEMA4D	SEMA4D	SEMA4D	chr9:91975705-92094611	siKLF5	siNT	11.6068	15.8144	0.446271	2.69426	5e-05	0.000141705	yes
SREBF1	SREBF1	SREBF1	chr17:17584786-17740325	siKLF5	siNT	22.9745	31.3007	0.446164	2.02601	0.00025	0.000640006	yes
RELA	RELA	RELA	chr11:65421066-65430443	siKLF5	siNT	22.7545	30.9955	0.445905	2.66494	5e-05	0.000141705	yes
ZFP36L1	ZFP36L1	ZFP36L1	chr14:69254371-69262960	siKLF5	siNT	40.8345	55.6161	0.445711	2.77841	5e-05	0.000141705	yes
TP53BP1	TP53BP1	TP53BP1	chr15:43663312-43910998	siKLF5	siNT	7.22269	9.83539	0.445445	1.59805	0.006	0.0117634	yes
HOXB8	HOXB8	HOXB8	chr17:46689707-46692301	siKLF5	siNT	6.7205	9.15056	0.445291	2.27062	0.0002	0.000520576	yes
PAFAH1B1	PAFAH1B1	PAFAH1B1	chr17:2496922-2588909	siKLF5	siNT	15.8558	21.5887	0.445259	2.7443	5e-05	0.000141705	yes
WDR3	WDR3	WDR3	chr1:118472371-118727848	siKLF5	siNT	13.9747	19.0255	0.445125	2.68229	5e-05	0.000141705	yes
EHF	EHF	EHF	chr11:34642587-34684834	siKLF5	siNT	50.422	68.6347	0.444883	2.76924	5e-05	0.000141705	yes
SSTR1	SSTR1	SSTR1	chr14:38677203-38682268	siKLF5	siNT	3.95925	5.38862	0.444688	2.40941	5e-05	0.000141705	yes
SHMT2	SHMT2	SHMT2	chr12:57623355-57634475	siKLF5	siNT	38.8529	52.8598	0.44415	2.73788	5e-05	0.000141705	yes
ELMO2	ELMO2	ELMO2	chr20:44994689-45035271	siKLF5	siNT	5.48925	7.46803	0.444118	2.45529	5e-05	0.000141705	yes
IGHMBP2	IGHMBP2	IGHMBP2	chr11:68671318-68708069	siKLF5	siNT	4.70818	6.40382	0.443763	2.43779	5e-05	0.000141705	yes
RBM23	RBM23	RBM23	chr14:23369853-23388396	siKLF5	siNT	19.926	27.1018	0.443733	2.65591	5e-05	0.000141705	yes
SEPT8	SEPT8	SEPT8	chr5:132083136-132113561	siKLF5	siNT	10.888	14.8076	0.443602	2.58017	5e-05	0.000141705	yes
FXYD5	FXYD5	FXYD5	chr19:35645624-35660788	siKLF5	siNT	467.634	635.965	0.443566	2.74568	5e-05	0.000141705	yes
CDC14B	CDC14B	CDC14B	chr9:99262394-99382112	siKLF5	siNT	8.51041	11.5721	0.443348	2.63314	5e-05	0.000141705	yes
PORCN	PORCN	PORCN	chrX:48367370-48379202	siKLF5	siNT	1.78446	2.42613	0.443172	1.69173	0.0034	0.00704253	yes
CXXC1	CXXC1	CXXC1	chr18:47808712-47814692	siKLF5	siNT	4.88706	6.64356	0.442988	2.3438	0.0001	0.000273198	yes
AIFM1	AIFM1	AIFM1	chrX:129263337-129299861	siKLF5	siNT	41.0009	55.7354	0.442938	2.72187	5e-05	0.000141705	yes
COPA	COPA	COPA	chr1:160258376-160328742	siKLF5	siNT	40.4567	54.995	0.442921	2.20516	0.0001	0.000273198	yes
PTPN11	PTPN11	PTPN11	chr12:112856535-112947717	siKLF5	siNT	41.3992	56.2706	0.442779	2.65193	5e-05	0.000141705	yes
CCND2	CCND2	CCND2	chr12:4382901-4414522	siKLF5	siNT	1.24564	1.69306	0.442749	2.1161	0.00015	0.000398712	yes
ARID4B	ARID4B	ARID4B	chr1:235330209-235491532	siKLF5	siNT	5.48296	7.45159	0.442594	2.56901	5e-05	0.000141705	yes
MAP2K1	MAP2K1	MAP2K1	chr15:66679210-66790146	siKLF5	siNT	34.3978	46.7477	0.44258	2.52137	5e-05	0.000141705	yes
ALYREF	ALYREF	ALYREF	chr17:79845710-79849462	siKLF5	siNT	126.42	171.8	0.442509	2.74057	5e-05	0.000141705	yes
ADRBK1	ADRBK1	ADRBK1	chr11:67033904-67054029	siKLF5	siNT	45.1285	61.3187	0.442288	2.75546	5e-05	0.000141705	yes
TARDBP	TARDBP	TARDBP	chr1:11072678-11085549	siKLF5	siNT	36.6831	49.843	0.442276	2.7544	5e-05	0.000141705	yes
RNH1	RNH1	RNH1	chr11:494511-507283	siKLF5	siNT	75.086	102.015	0.44216	2.74879	5e-05	0.000141705	yes
PSMC5	PSMC5	PSMC5	chr17:61896792-61909387	siKLF5	siNT	73.8499	100.3	0.441652	2.01384	0.00085	0.00199057	yes
ARHGAP1	ARHGAP1	ARHGAP1	chr11:46698624-46722215	siKLF5	siNT	34.3097	46.5965	0.441604	2.7375	5e-05	0.000141705	yes
LRP10	LRP10	LRP10	chr14:23340959-23347291	siKLF5	siNT	45.015	61.1337	0.441561	2.74758	5e-05	0.000141705	yes
C17orf53	C17orf53	C17orf53	chr17:42219273-42239844	siKLF5	siNT	1.93935	2.63347	0.441394	1.92294	0.0007	0.00167213	yes
KTN1	KTN1	KTN1	chr14:56046924-56151302	siKLF5	siNT	18.4376	25.0366	0.441389	2.70599	5e-05	0.000141705	yes
NUP205	NUP205	NUP205	chr7:135242661-135333499	siKLF5	siNT	20.7949	28.2376	0.441385	2.74533	5e-05	0.000141705	yes
PRPF3	PRPF3	PRPF3	chr1:150293927-150325704	siKLF5	siNT	24.76	33.621	0.441349	2.67268	5e-05	0.000141705	yes
MLKL	MLKL	MLKL	chr16:74705752-74734789	siKLF5	siNT	6.61392	8.97969	0.44116	2.37579	0.00015	0.000398712	yes
RALGPS1	RALGPS1	RALGPS1	chr9:129677052-129985445	siKLF5	siNT	11.2021	15.2086	0.441108	2.18536	0.0002	0.000520576	yes
DDN	DDN	DDN	chr12:49388932-49393088	siKLF5	siNT	1.12176	1.52287	0.441025	1.84125	0.00105	0.00241973	yes
CNOT4	CNOT4	CNOT4	chr7:135046546-135194875	siKLF5	siNT	6.92341	9.39805	0.440879	2.47287	5e-05	0.000141705	yes
RUSC1	RUSC1	RUSC1	chr1:155278538-155300909	siKLF5	siNT	30.2582	41.062	0.440479	1.46421	0.01335	0.024182	yes
CAB39	CAB39	CAB39	chr2:231577556-231685790	siKLF5	siNT	19.8296	26.9085	0.440406	2.7093	5e-05	0.000141705	yes
TLN1	TLN1	TLN1	chr9:35697333-35749225	siKLF5	siNT	11.881	16.121	0.440283	2.03006	0.0009	0.00210086	yes
CTU1	CTU1	CTU1	chr19:51600862-51611647	siKLF5	siNT	4.34968	5.90188	0.440266	2.12085	0.0004	0.000994575	yes
AFAP1	AFAP1	AFAP1	chr4:7755816-7941653	siKLF5	siNT	6.81251	9.24351	0.440256	2.59401	5e-05	0.000141705	yes
ZFP36L2	ZFP36L2	ZFP36L2	chr2:43449540-43453745	siKLF5	siNT	68.0564	92.3404	0.440231	2.74897	5e-05	0.000141705	yes
GLIS2	GLIS2	GLIS2	chr16:4382224-4389598	siKLF5	siNT	2.51669	3.41466	0.440212	2.15424	5e-05	0.000141705	yes
SAMHD1	SAMHD1	SAMHD1	chr20:35504569-35580246	siKLF5	siNT	6.40796	8.69315	0.440012	2.26993	5e-05	0.000141705	yes
WIPF2	WIPF2	WIPF2	chr17:38375573-38438439	siKLF5	siNT	8.95662	12.1505	0.439989	2.64078	5e-05	0.000141705	yes
TACC3	TACC3	TACC3	chr4:1723216-1746905	siKLF5	siNT	36.7344	49.826	0.439768	2.71997	5e-05	0.000141705	yes
PMM2	PMM2	PMM2	chr16:8891669-8943194	siKLF5	siNT	26.9531	36.5519	0.439493	2.66535	5e-05	0.000141705	yes
CHRM1	CHRM1	CHRM1	chr11:62676150-62689012	siKLF5	siNT	3.63522	4.92964	0.439442	2.18338	0.00015	0.000398712	yes
NUB1	NUB1	NUB1	chr7:151038846-151075548	siKLF5	siNT	23.5087	31.8706	0.43903	2.68772	5e-05	0.000141705	yes
ATXN2	ATXN2	ATXN2	chr12:111890017-112037480	siKLF5	siNT	4.32338	5.86092	0.438968	2.43975	5e-05	0.000141705	yes
KPNA1	KPNA1	KPNA1	chr3:122140747-122233786	siKLF5	siNT	13.7226	18.5941	0.438286	2.7153	5e-05	0.000141705	yes
BLCAP	BLCAP	BLCAP	chr20:36145818-36156333	siKLF5	siNT	25.9188	35.117	0.438167	2.6233	5e-05	0.000141705	yes
TSC22D2	TSC22D2	TSC22D2	chr3:150126787-150177615	siKLF5	siNT	5.14343	6.96767	0.437947	2.4263	5e-05	0.000141705	yes
KLHL18	KLHL18	KLHL18	chr3:47205859-47388306	siKLF5	siNT	3.57341	4.84077	0.437936	1.61232	0.0085	0.0160995	yes
SERBP1	SERBP1	SERBP1	chr1:67873492-67896123	siKLF5	siNT	61.9397	83.9052	0.437897	2.70541	5e-05	0.000141705	yes
TMEM131	TMEM131	TMEM131	chr2:98372800-98612354	siKLF5	siNT	7.5737	10.2576	0.437626	2.63206	5e-05	0.000141705	yes
WDR7	WDR7	WDR7	chr18:54318615-54697036	siKLF5	siNT	1.20945	1.63788	0.437479	2.1164	0.00045	0.00111013	yes
CMTM4	CMTM4	CMTM4	chr16:66648652-66730610	siKLF5	siNT	19.4305	26.3114	0.437367	2.62593	5e-05	0.000141705	yes
FAM131C	FAM131C	FAM131C	chr1:16384263-16400127	siKLF5	siNT	2.2455	3.04049	0.437269	1.73291	0.0027	0.00570909	yes
KIF4A	KIF4A	KIF4A	chrX:69509878-69640774	siKLF5	siNT	24.7252	33.4676	0.436783	2.70668	5e-05	0.000141705	yes
PRRC2A	PRRC2A	PRRC2A	chr6_ssto_hap7:2919252-2936356	siKLF5	siNT	28.204	38.1754	0.436744	2.7089	5e-05	0.000141705	yes
RNF168	RNF168	RNF168	chr3:196195656-196230639	siKLF5	siNT	5.08664	6.88452	0.436643	2.5054	5e-05	0.000141705	yes
MED24	MED24	MED24	chr17:38175349-38210889	siKLF5	siNT	12.2379	16.5623	0.436544	2.60441	5e-05	0.000141705	yes
MYO1B	MYO1B	MYO1B	chr2:192110106-192290115	siKLF5	siNT	1.61056	2.17955	0.436463	2.04366	0.0006	0.00144989	yes
RMND5A	RMND5A	RMND5A	chr2:86730552-87005164	siKLF5	siNT	9.1957	12.443	0.436304	1.30167	0.02405	0.0412003	yes
MON1A	MON1A	MON1A	chr3:49946301-49967445	siKLF5	siNT	6.93793	9.38669	0.436111	2.28834	5e-05	0.000141705	yes
FAM84B	FAM84B	FAM84B	chr8:127564682-127570711	siKLF5	siNT	31.2421	42.2671	0.436043	2.72221	5e-05	0.000141705	yes
SLCO3A1	SLCO3A1	SLCO3A1	chr15:92396937-92715665	siKLF5	siNT	0.887827	1.20111	0.43602	1.43208	0.0122	0.0222962	yes
PARVA	PARVA	PARVA	chr11:12399025-12556903	siKLF5	siNT	4.53447	6.13429	0.435963	2.58222	5e-05	0.000141705	yes
FKBP15	FKBP15	FKBP15	chr9:115927799-115983641	siKLF5	siNT	9.06613	12.2633	0.435789	2.57676	5e-05	0.000141705	yes
MEPCE	MEPCE	MEPCE	chr7:99998494-100031749	siKLF5	siNT	15.7547	21.3099	0.435744	2.34131	0.0001	0.000273198	yes
SYTL4	SYTL4	SYTL4	chrX:99929488-99987135	siKLF5	siNT	5.66345	7.65927	0.435527	2.46492	5e-05	0.000141705	yes
WDR76	WDR76	WDR76	chr15:44119111-44160617	siKLF5	siNT	3.77508	5.10515	0.435446	2.32227	5e-05	0.000141705	yes
HNRNPK	HNRNPK	HNRNPK	chr9:86582997-86595569	siKLF5	siNT	257.093	347.624	0.435236	2.66354	5e-05	0.000141705	yes
GALE	GALE	GALE	chr1:24122088-24127294	siKLF5	siNT	32.6667	44.1608	0.434946	2.60724	5e-05	0.000141705	yes
ANKRD29	ANKRD29	ANKRD29	chr18:21179977-21242849	siKLF5	siNT	3.53126	4.77353	0.434873	2.04258	0.0005	0.00122389	yes
AFG3L2	AFG3L2	AFG3L2	chr18:12328942-12377275	siKLF5	siNT	99.403	134.358	0.434717	2.71035	5e-05	0.000141705	yes
DDX6	DDX6	DDX6	chr11:118618472-118661972	siKLF5	siNT	26.2902	35.5329	0.434633	2.71855	5e-05	0.000141705	yes
ZBTB43	ZBTB43	ZBTB43	chr9:129567284-129600487	siKLF5	siNT	3.30517	4.46685	0.434532	2.40157	5e-05	0.000141705	yes
ALAS1	ALAS1	ALAS1	chr3:52232098-52248343	siKLF5	siNT	35.0937	47.4234	0.434387	2.65885	5e-05	0.000141705	yes
DLG1	DLG1	DLG1	chr3:196769430-197030621	siKLF5	siNT	21.2773	28.7494	0.434217	2.66907	5e-05	0.000141705	yes
KCNE3	KCNE3	KCNE3	chr11:74165885-74178600	siKLF5	siNT	52.0843	70.3711	0.434135	2.70572	5e-05	0.000141705	yes
CD2BP2	CD2BP2	CD2BP2	chr16:30362086-30366682	siKLF5	siNT	10.3937	14.0419	0.434027	2.54209	5e-05	0.000141705	yes
IER3	IER3	IER3	chr6_ssto_hap7:2043292-2044644	siKLF5	siNT	57.5266	77.7144	0.433952	2.63624	5e-05	0.000141705	yes
EIF2B4	EIF2B4	EIF2B4	chr2:27587218-27593324	siKLF5	siNT	17.8476	24.1095	0.433866	2.50055	5e-05	0.000141705	yes
CDYL	CDYL	CDYL	chr6:4706392-4955778	siKLF5	siNT	7.24457	9.78617	0.433843	2.46323	5e-05	0.000141705	yes
WIZ	WIZ	WIZ	chr19:15532317-15560762	siKLF5	siNT	13.8543	18.7136	0.433745	2.61958	5e-05	0.000141705	yes
DGKZ	DGKZ	DGKZ	chr11:46354454-46402104	siKLF5	siNT	36.5529	49.3729	0.433736	2.6772	5e-05	0.000141705	yes
ANKZF1	ANKZF1	ANKZF1	chr2:220094478-220101391	siKLF5	siNT	3.90988	5.28068	0.433598	2.14578	0.00025	0.000640006	yes
WWP2	WWP2	WWP2	chr16:69796186-69975644	siKLF5	siNT	8.89463	12.0131	0.433598	2.53752	5e-05	0.000141705	yes
RRP1B	RRP1B	RRP1B	chr21:45079431-45115960	siKLF5	siNT	15.7615	21.2861	0.433512	2.66032	5e-05	0.000141705	yes
VPS18	VPS18	VPS18	chr15:41186627-41196173	siKLF5	siNT	6.53007	8.81854	0.433442	2.46589	5e-05	0.000141705	yes
SPEN	SPEN	SPEN	chr1:16160709-16266950	siKLF5	siNT	5.58651	7.54412	0.433407	2.62057	5e-05	0.000141705	yes
WBP2	WBP2	WBP2	chr17:73841779-73851501	siKLF5	siNT	31.4935	42.5276	0.433344	2.61859	5e-05	0.000141705	yes
RAB11FIP5	RAB11FIP5	RAB11FIP5	chr2:73300509-73340146	siKLF5	siNT	6.36479	8.59323	0.433087	2.48471	5e-05	0.000141705	yes
TRIM65	TRIM65	TRIM65	chr17:73885040-73893084	siKLF5	siNT	5.7241	7.72795	0.433036	2.37822	0.0001	0.000273198	yes
FAM53C	FAM53C	FAM53C	chr5:137673223-137685418	siKLF5	siNT	5.25888	7.09976	0.433015	2.43669	5e-05	0.000141705	yes
ZNF444	ZNF444	ZNF444	chr19:56652534-56672262	siKLF5	siNT	13.4423	18.1452	0.432807	2.45972	5e-05	0.000141705	yes
AK1	AK1	AK1	chr9:130628758-130640022	siKLF5	siNT	40.0347	54.0345	0.43263	2.66122	5e-05	0.000141705	yes
SUGP2	SUGP2	SUGP2	chr19:19101696-19144380	siKLF5	siNT	9.54676	12.8844	0.432543	2.53124	5e-05	0.000141705	yes
ARHGAP5	ARHGAP5	ARHGAP5	chr14:32546494-32628934	siKLF5	siNT	9.92931	13.4007	0.432543	2.67242	5e-05	0.000141705	yes
COPG1	COPG1	COPG1	chr3:128968452-128996616	siKLF5	siNT	61.3984	82.8496	0.432294	2.69954	5e-05	0.000141705	yes
FTSJ1	FTSJ1	FTSJ1	chrX:48334548-48344752	siKLF5	siNT	15.8331	21.3642	0.43225	2.45733	5e-05	0.000141705	yes
DDX23	DDX23	DDX23	chr12:49223538-49245957	siKLF5	siNT	39.698	53.5633	0.432177	2.68341	5e-05	0.000141705	yes
DHX15	DHX15	DHX15	chr4:24529087-24586184	siKLF5	siNT	46.7865	63.1265	0.432154	2.68996	5e-05	0.000141705	yes
PHLPP1	PHLPP1	PHLPP1	chr18:60382671-60647676	siKLF5	siNT	1.51401	2.04272	0.432122	2.13757	0.00015	0.000398712	yes
TOX4	TOX4	TOX4	chr14:21945334-21979457	siKLF5	siNT	11.6624	15.7347	0.432084	2.21229	0.0002	0.000520576	yes
C22orf28	C22orf28	C22orf28	chr22:32783561-32808274	siKLF5	siNT	43.1183	58.1657	0.431868	2.65582	5e-05	0.000141705	yes
ITPKB	ITPKB	ITPKB	chr1:226819390-226926876	siKLF5	siNT	1.11074	1.49767	0.4312	1.97419	0.00085	0.00199057	yes
PERP	PERP	PERP	chr6:138409641-138428660	siKLF5	siNT	72.6468	97.9488	0.431128	2.69052	5e-05	0.000141705	yes
SKI	SKI	SKI	chr1:2160133-2241652	siKLF5	siNT	9.10926	12.2818	0.431118	2.59532	5e-05	0.000141705	yes
MAP3K11	MAP3K11	MAP3K11	chr11:65365225-65381720	siKLF5	siNT	18.0104	24.2792	0.430885	2.61846	5e-05	0.000141705	yes
KAT5	KAT5	KAT5	chr11:65479472-65488409	siKLF5	siNT	7.23373	9.75098	0.430807	1.3754	0.01965	0.0343037	yes
TAF4	TAF4	TAF4	chr20:60549853-60640866	siKLF5	siNT	9.99791	13.4766	0.430755	2.57472	5e-05	0.000141705	yes
RIN2	RIN2	RIN2	chr20:19867164-19983103	siKLF5	siNT	7.20438	9.71059	0.430684	2.49919	5e-05	0.000141705	yes
EPN1	EPN1	EPN1	chr19:56186560-56207133	siKLF5	siNT	78.6359	105.973	0.430442	2.67013	5e-05	0.000141705	yes
KDM1A	KDM1A	KDM1A	chr1:23345940-23410184	siKLF5	siNT	23.3756	31.5019	0.430436	2.61894	5e-05	0.000141705	yes
USP19	USP19	USP19	chr3:49145478-49158371	siKLF5	siNT	9.00454	12.1313	0.430009	2.5553	5e-05	0.000141705	yes
PARP14	PARP14	PARP14	chr3:122399671-122449687	siKLF5	siNT	1.35249	1.82179	0.429743	2.16019	0.0003	0.000760714	yes
GCN1L1	GCN1L1	GCN1L1	chr12:120565013-120632513	siKLF5	siNT	19.637	26.4423	0.429276	2.67799	5e-05	0.000141705	yes
PRRC2C	PRRC2C	PRRC2C	chr1:171454665-171562650	siKLF5	siNT	18.5746	25.0085	0.429086	2.67611	5e-05	0.000141705	yes
MFN2	MFN2	MFN2	chr1:12040237-12073572	siKLF5	siNT	21.2164	28.563	0.428967	2.6535	5e-05	0.000141705	yes
IFT140	IFT140	IFT140	chr16:1543351-1662109	siKLF5	siNT	1.45881	1.96378	0.428843	1.3255	0.0231	0.039728	yes
PER1	PER1	PER1	chr17:8043787-8055753	siKLF5	siNT	1.67659	2.25653	0.428575	2.02614	0.00015	0.000398712	yes
SH3GL1	SH3GL1	SH3GL1	chr19:4360363-4400565	siKLF5	siNT	27.2252	36.6417	0.428543	2.6056	5e-05	0.000141705	yes
ENGASE	ENGASE	ENGASE	chr17:77071018-77084685	siKLF5	siNT	3.28748	4.42411	0.428406	2.27817	5e-05	0.000141705	yes
NCAPG2	NCAPG2	NCAPG2	chr7:158424002-158497520	siKLF5	siNT	22.5505	30.3441	0.428256	2.63731	5e-05	0.000141705	yes
UBC	UBC	UBC	chr12:125396191-125399587	siKLF5	siNT	100.747	135.562	0.428221	2.67287	5e-05	0.000141705	yes
LOC146880	LOC146880	LOC146880	chr17:62745779-62778117	siKLF5	siNT	2.00326	2.6952	0.428043	1.93028	0.0006	0.00144989	yes
KIAA0368	KIAA0368	KIAA0368	chr9:114122972-114247025	siKLF5	siNT	20.8502	28.0494	0.427905	2.6673	5e-05	0.000141705	yes
PHF2	PHF2	PHF2	chr9:96338908-96441869	siKLF5	siNT	10.7134	14.4125	0.427898	2.58902	5e-05	0.000141705	yes
LRRC59	LRRC59	LRRC59	chr17:48450580-48474914	siKLF5	siNT	123.675	166.376	0.427898	2.63148	5e-05	0.000141705	yes
ASCC3	ASCC3	ASCC3	chr6:100956607-101329224	siKLF5	siNT	9.77186	13.1447	0.427776	2.51458	5e-05	0.000141705	yes
L3MBTL2	L3MBTL2	L3MBTL2	chr22:41601312-41636935	siKLF5	siNT	25.1506	33.8285	0.427646	2.60713	5e-05	0.000141705	yes
ZFP106	ZFP106	ZFP106	chr15:42705020-42749730	siKLF5	siNT	7.0863	9.53129	0.427639	2.61976	5e-05	0.000141705	yes
STAG1	STAG1	STAG1	chr3:136055998-136471245	siKLF5	siNT	7.87813	10.5949	0.427443	2.53491	5e-05	0.000141705	yes
GART	GART	GART	chr21:34876237-34915198	siKLF5	siNT	66.9476	90.0257	0.427305	2.61927	5e-05	0.000141705	yes
ASPSCR1	ASPSCR1	ASPSCR1	chr17:79935425-79975282	siKLF5	siNT	17.1346	23.0343	0.426871	2.48103	5e-05	0.000141705	yes
MSI2	MSI2	MSI2	chr17:55333930-55757299	siKLF5	siNT	46.0291	61.8745	0.426801	2.60333	5e-05	0.000141705	yes
TTC26	TTC26	TTC26	chr7:138818489-138874550	siKLF5	siNT	1.74439	2.34467	0.426664	1.72324	0.0032	0.00666875	yes
ZNF275	ZNF275	ZNF275	chrX:152599612-152618384	siKLF5	siNT	4.41649	5.93528	0.426417	2.45371	0.00015	0.000398712	yes
WHSC1	WHSC1	WHSC1	chr4:1873122-1983934	siKLF5	siNT	18.1186	24.3478	0.426317	2.6336	5e-05	0.000141705	yes
DNAJB11	DNAJB11	DNAJB11	chr3:186288466-186303589	siKLF5	siNT	93.2764	125.326	0.426107	2.65136	5e-05	0.000141705	yes
ASCL2	ASCL2	ASCL2	chr11:2289727-2292182	siKLF5	siNT	6.26267	8.41419	0.426045	2.14964	0.0003	0.000760714	yes
MFAP1	MFAP1	MFAP1	chr15:44096732-44116951	siKLF5	siNT	22.3269	29.9946	0.425923	2.52949	5e-05	0.000141705	yes
PQLC1	PQLC1	PQLC1	chr18:77662419-77711653	siKLF5	siNT	4.99446	6.70895	0.425758	2.16841	0.00015	0.000398712	yes
MED15	MED15	MED15	chr22:20861885-20941919	siKLF5	siNT	19.0617	25.6033	0.425651	2.59375	5e-05	0.000141705	yes
TBRG4	TBRG4	TBRG4	chr7:45139698-45151346	siKLF5	siNT	44.5574	59.8468	0.425609	2.62569	5e-05	0.000141705	yes
TMBIM1	TMBIM1	TMBIM1	chr2:219135114-219211516	siKLF5	siNT	128.07	172.013	0.425589	2.29144	5e-05	0.000141705	yes
SLC45A4	SLC45A4	SLC45A4	chr8:142220869-142238673	siKLF5	siNT	12.6899	17.0435	0.425544	2.52859	5e-05	0.000141705	yes
ZC3HAV1	ZC3HAV1	ZC3HAV1	chr7:138728265-138794465	siKLF5	siNT	5.63635	7.56992	0.425518	2.34731	0.0001	0.000273198	yes
BRAT1	BRAT1	BRAT1	chr7:2577443-2595392	siKLF5	siNT	8.67753	11.6543	0.4255	2.41373	5e-05	0.000141705	yes
ZBTB4	ZBTB4	ZBTB4	chr17:7362684-7387568	siKLF5	siNT	3.19657	4.29305	0.425478	2.33604	5e-05	0.000141705	yes
EPB49	EPB49	EPB49	chr8:21911080-21940036	siKLF5	siNT	23.3786	31.3875	0.425005	2.56377	5e-05	0.000141705	yes
ATP2A2	ATP2A2	ATP2A2	chr12:110719031-110788897	siKLF5	siNT	53.949	72.4253	0.424897	2.47032	5e-05	0.000141705	yes
ATF7IP	ATF7IP	ATF7IP	chr12:14518610-14651697	siKLF5	siNT	6.23915	8.37562	0.424847	2.44969	5e-05	0.000141705	yes
NOL7	NOL7	NOL7	chr6:13615558-13621127	siKLF5	siNT	83.9694	112.723	0.424847	2.57351	5e-05	0.000141705	yes
RBM38	RBM38	RBM38	chr20:55904830-55998278	siKLF5	siNT	18.1099	24.3099	0.424769	1.70832	0.0033	0.00685737	yes
FEM1A	FEM1A	FEM1A	chr19:4791727-4795571	siKLF5	siNT	10.3145	13.8429	0.424473	2.5082	5e-05	0.000141705	yes
DSC2	DSC2	DSC2	chr18:28645941-28682388	siKLF5	siNT	32.0737	43.0448	0.42445	2.64969	5e-05	0.000141705	yes
CCDC97	CCDC97	CCDC97	chr19:41816093-41830788	siKLF5	siNT	13.2653	17.8006	0.424273	2.52497	5e-05	0.000141705	yes
ATXN7L3	ATXN7L3	ATXN7L3	chr17:42269172-42275529	siKLF5	siNT	11.6138	15.5805	0.423906	2.52007	5e-05	0.000141705	yes
PRKDC	PRKDC	PRKDC	chr8:48685668-48872743	siKLF5	siNT	31.7714	42.6212	0.423839	2.62713	5e-05	0.000141705	yes
EPB41	EPB41	EPB41	chr1:29213602-29450421	siKLF5	siNT	11.1667	14.9771	0.423556	2.38429	5e-05	0.000141705	yes
IDH3B	IDH3B	IDH3B	chr20:2639040-2644865	siKLF5	siNT	55.0405	73.8175	0.423468	2.59575	5e-05	0.000141705	yes
NELFB	NELFB	NELFB	chr9:140149758-140168000	siKLF5	siNT	55.6749	74.6679	0.423462	2.63353	5e-05	0.000141705	yes
HEATR5B	HEATR5B	HEATR5B	chr2:37208152-37311485	siKLF5	siNT	5.43941	7.29456	0.423371	2.49478	5e-05	0.000141705	yes
SNW1	SNW1	SNW1	chr14:78183943-78236085	siKLF5	siNT	39.2851	52.6835	0.423367	2.59406	5e-05	0.000141705	yes
TOP3A	TOP3A	TOP3A	chr17:18177234-18218321	siKLF5	siNT	10.1336	13.5874	0.423132	2.51175	5e-05	0.000141705	yes
ZNF408	ZNF408	ZNF408	chr11:46722316-46727466	siKLF5	siNT	8.76633	11.7541	0.423124	2.31895	5e-05	0.000141705	yes
CELSR1	CELSR1	CELSR1	chr22:46756730-46933067	siKLF5	siNT	2.64862	3.55093	0.422956	2.45314	5e-05	0.000141705	yes
ARHGEF18	ARHGEF18	ARHGEF18	chr19:7459998-7537371	siKLF5	siNT	11.2652	15.1029	0.422956	2.5675	5e-05	0.000141705	yes
SIAH2	SIAH2	SIAH2	chr3:150458909-150481263	siKLF5	siNT	17.2694	23.1516	0.422897	2.5172	5e-05	0.000141705	yes
CASC5	CASC5	CASC5	chr15:40886446-40954881	siKLF5	siNT	7.58232	10.1645	0.422823	2.551	5e-05	0.000141705	yes
ZNF783	ZNF783	ZNF783	chr7:148959261-148982085	siKLF5	siNT	2.74944	3.68499	0.422521	2.1795	0.00015	0.000398712	yes
PDS5A	PDS5A	PDS5A	chr4:39824482-39979576	siKLF5	siNT	19.1706	25.6937	0.42252	2.49183	5e-05	0.000141705	yes
NF2	NF2	NF2	chr22:29999544-30094589	siKLF5	siNT	14.0239	18.7955	0.422501	2.31565	0.0001	0.000273198	yes
SRCAP	SRCAP	SRCAP	chr16:30710461-30751450	siKLF5	siNT	8.7582	11.7379	0.422469	2.6057	5e-05	0.000141705	yes
GFM1	GFM1	GFM1	chr3:158362316-158410360	siKLF5	siNT	41.5834	55.7254	0.422328	2.59497	5e-05	0.000141705	yes
MAP2K7	MAP2K7	MAP2K7	chr19:7968764-7979363	siKLF5	siNT	7.15717	9.58938	0.422048	2.38054	0.0001	0.000273198	yes
EFCAB4A	EFCAB4A	EFCAB4A	chr11:827584-831991	siKLF5	siNT	20.0385	26.8467	0.421973	2.46417	5e-05	0.000141705	yes
SDC3	SDC3	SDC3	chr1:31342312-31381480	siKLF5	siNT	4.41557	5.91553	0.421909	2.36349	0.0001	0.000273198	yes
RPS6KA2	RPS6KA2	RPS6KA2	chr6:166822853-167275771	siKLF5	siNT	3.59264	4.81231	0.421684	2.36571	0.0002	0.000520576	yes
TYRO3	TYRO3	TYRO3	chr15:41851219-41871536	siKLF5	siNT	9.56031	12.8047	0.421543	2.48355	5e-05	0.000141705	yes
TMEM214	TMEM214	TMEM214	chr2:27255773-27264565	siKLF5	siNT	35.1596	47.084	0.421321	2.60776	5e-05	0.000141705	yes
WRAP53	WRAP53	WRAP53	chr17:7571719-7606820	siKLF5	siNT	7.10874	9.51813	0.421085	1.64819	0.0047	0.00944228	yes
C18orf8	C18orf8	C18orf8	chr18:21083433-21166581	siKLF5	siNT	8.04088	10.7634	0.420704	1.31843	0.0223	0.038449	yes
PIP4K2C	PIP4K2C	PIP4K2C	chr12:57984941-57997211	siKLF5	siNT	9.56512	12.8034	0.420677	2.41609	5e-05	0.000141705	yes
XPC	XPC	XPC	chr3:14186647-14220172	siKLF5	siNT	4.55415	6.09553	0.420569	2.2761	0.00015	0.000398712	yes
FAM53B	FAM53B	FAM53B	chr10:126307862-126432930	siKLF5	siNT	3.61476	4.83794	0.420495	2.34145	5e-05	0.000141705	yes
PVRL4	PVRL4	PVRL4	chr1:161040780-161059385	siKLF5	siNT	12.5266	16.7652	0.420475	2.50254	5e-05	0.000141705	yes
RIPK4	RIPK4	RIPK4	chr21:43159528-43187249	siKLF5	siNT	7.03814	9.41895	0.420372	2.40341	0.00015	0.000398712	yes
SLC46A1	SLC46A1	SLC46A1	chr17:26698986-26733230	siKLF5	siNT	2.4038	3.21676	0.420288	2.00339	0.0007	0.00167213	yes
ITPKC	ITPKC	ITPKC	chr19:41223007-41255828	siKLF5	siNT	9.01975	12.07	0.420265	2.15404	0.0002	0.000520576	yes
[truncated: 2,935 more rows]
