# Supplementary material for: Repurposing of KLF5 activates a cell cycle signature during the progression from a precursor state to Oesophageal Adenocarcinoma
Source: bioRxiv preprint, doi:10.1101/2020.02.10.941872, version 2 (2020-08-27)
Supplement: Supplementary Table 5 [file 941872_file09.xlsx]

## Sheet: Legend
Table S5. KLF5 ChIP-seq datasets (A) ChIP-seq peaks in OE19 cells. (B) ChIP-seq peaks in CP-A cells. (C) Differentially bound KLF5 ChIP-seq peaks (CP-A vs OE19)

## Sheet: S5A OE19 KLF5 ChIP-seq peaks
chr	start	end
chr1	713900	714280
chr1	868407	868955
chr1	873490	873878
chr1	894457	895050
chr1	901537	902540
chr1	911314	912049
chr1	935407	936374
chr1	956245	957195
chr1	959182	960579
chr1	994619	995412
chr1	1008859	1010118
chr1	1014945	1015770
chr1	1045116	1045601
chr1	1051284	1051937
chr1	1059220	1061149
chr1	1071745	1073496
chr1	1085446	1085906
chr1	1092857	1095481
chr1	1099878	1100905
chr1	1101222	1101554
chr1	1102509	1103158
chr1	1172525	1174375
chr1	1209094	1209657
chr1	1229109	1229620
chr1	1243374	1244174
chr1	1259830	1260671
chr1	1280112	1281301
chr1	1282952	1283565
chr1	1310439	1310955
chr1	1334611	1335131
chr1	1406810	1407259
chr1	1550637	1551198
chr1	1562663	1565034
chr1	1610216	1610595
chr1	1690093	1690714
chr1	1713699	1714691
chr1	1790198	1791108
chr1	1822426	1822692
chr1	1850243	1851401
chr1	2035986	2036890
chr1	2066492	2067881
chr1	2068544	2069455
chr1	2071513	2071991
chr1	2130208	2131062
chr1	2136763	2137214
chr1	2144067	2144564
chr1	2165861	2166440
chr1	2343808	2344824
chr1	2347190	2348301
chr1	2466139	2466553
chr1	2506940	2507697
chr1	2509723	2510198
chr1	2517731	2518941
chr1	3049121	3049540
chr1	3207398	3207900
chr1	3208587	3210407
chr1	3236478	3237732
chr1	3239681	3240448
chr1	3265306	3266089
chr1	3276060	3276702
chr1	3310139	3310510
chr1	3335786	3336352
chr1	3339914	3340309
chr1	3370535	3372135
chr1	3375993	3377026
chr1	3585359	3585711
chr1	3773719	3774085
chr1	3816433	3818161
chr1	5573657	5574484
chr1	5611638	5612122
chr1	5658016	5658510
chr1	5826296	5827630
chr1	6086146	6086522
chr1	6217710	6218306
chr1	6259582	6260037
chr1	6265813	6266492
chr1	6330200	6330460
chr1	6360396	6361116
chr1	6403550	6404164
chr1	6413853	6414420
chr1	6453236	6454227
chr1	6464850	6465215
chr1	6474355	6474720
chr1	6479924	6481088
chr1	6531450	6532782
chr1	6673504	6673888
chr1	7322863	7323185
chr1	7325760	7326453
chr1	7338013	7338488
chr1	7632609	7633242
chr1	7830967	7831698
chr1	7843434	7844522
chr1	8065004	8065639
chr1	8181021	8181361
chr1	8227450	8227787
chr1	8234517	8235239
chr1	8242086	8242846
chr1	8257478	8258333
chr1	8345190	8345548
chr1	8353140	8353586
chr1	8772264	8772867
chr1	8938044	8939374
chr1	9189529	9190038
chr1	9294266	9294765
chr1	9360092	9360665
chr1	9937972	9938401
chr1	10002964	10003686
chr1	10092646	10093236
chr1	10270082	10270688
chr1	10490191	10490752
chr1	10534615	10535159
chr1	10739666	10740113
chr1	10815926	10816408
chr1	10819518	10820349
chr1	10838888	10840049
chr1	10856394	10857040
chr1	10863942	10864771
chr1	10960628	10961893
chr1	10997402	10998269
chr1	11159315	11160363
chr1	11333232	11333598
chr1	11740919	11741727
chr1	11865872	11866699
chr1	11969722	11970072
chr1	12040041	12040567
chr1	12079205	12079865
chr1	12203812	12204765
chr1	12208220	12208734
chr1	12246538	12247110
chr1	12538020	12538734
chr1	12589429	12589909
chr1	12646866	12647349
chr1	12675793	12676905
chr1	12678775	12679568
chr1	15516339	15516731
chr1	15527053	15527673
chr1	15528470	15528998
chr1	15555713	15556816
chr1	15743353	15744351
chr1	15750605	15751455
chr1	16067637	16068292
chr1	16090931	16091321
chr1	16106841	16107857
chr1	16121679	16122008
chr1	16126321	16127072
chr1	16161006	16161886
chr1	16382542	16382880
chr1	16481366	16481828
chr1	16485324	16485998
chr1	16488657	16489455
chr1	16498817	16499208
chr1	16499500	16500507
chr1	16508304	16508782
chr1	16515500	16515976
chr1	16543707	16544346
chr1	16563488	16564013
chr1	16693433	16694268
chr1	16766979	16767585
chr1	16826363	16826720
chr1	17231123	17231706
chr1	17240214	17240564
chr1	17380361	17380865
chr1	17555571	17556470
chr1	17767864	17768528
chr1	17839585	17840060
chr1	17846406	17847261
chr1	17877475	17877983
chr1	17880439	17880877
chr1	17914337	17915287
chr1	17922799	17924532
chr1	17951194	17951712
chr1	18261820	18263064
chr1	18767162	18767603
chr1	18969947	18970478
chr1	18971026	18972172
chr1	18992869	18993368
chr1	19228998	19229559
chr1	19340419	19340787
chr1	19407821	19408404
chr1	19612346	19612876
chr1	19615090	19615636
chr1	19711186	19711940
chr1	19794776	19795332
chr1	19811784	19812831
chr1	19966373	19967789
chr1	20126058	20126368
chr1	20247646	20248291
chr1	20248674	20249136
chr1	20251605	20252241
chr1	20253114	20253467
chr1	20272615	20273528
chr1	20301193	20301877
chr1	20558992	20559551
chr1	20576920	20577651
chr1	20582166	20582561
chr1	20802553	20803364
chr1	20812811	20813755
chr1	20822628	20823229
chr1	20914973	20915688
chr1	20938778	20939391
chr1	21650932	21651589
chr1	21913332	21913745
chr1	21934177	21934863
chr1	21941049	21941790
chr1	21950070	21950499
chr1	21953304	21953883
chr1	21958352	21959185
chr1	21960133	21961459
chr1	22213316	22213796
chr1	22230917	22231960
chr1	22253899	22254628
chr1	22257601	22257967
chr1	22261970	22262816
chr1	22301017	22301645
chr1	22323760	22324474
chr1	22334911	22335769
chr1	22378939	22379697
chr1	22586177	22586834
chr1	22588965	22589503
chr1	22777944	22778659
chr1	23028149	23029533
chr1	23043492	23043890
chr1	23551182	23551906
chr1	23750345	23750615
chr1	23778372	23778912
chr1	23810960	23811589
chr1	23850655	23852025
chr1	23854308	23855175
chr1	23885844	23886618
chr1	23888702	23889140
chr1	24117246	24117704
chr1	24151675	24152164
chr1	24164983	24165508
chr1	24344989	24345655
chr1	24347520	24348345
chr1	24446380	24447300
chr1	24469461	24470102
chr1	24501771	24502331
chr1	24518351	24519045
chr1	24529530	24530283
chr1	24592871	24593580
chr1	24621000	24621780
chr1	24645629	24646109
chr1	24648144	24649123
chr1	24652553	24653250
chr1	24700960	24701912
chr1	24715669	24716461
chr1	24828557	24829521
chr1	25010063	25010419
chr1	25031698	25032336
chr1	25071305	25071973
chr1	25493623	25494432
chr1	25494732	25495268
chr1	25573470	25574359
chr1	25876001	25876626
chr1	25883216	25883795
chr1	25895027	25895799
chr1	26216990	26217444
chr1	26231859	26232540
chr1	26232848	26233258
chr1	26324481	26325110
chr1	26404917	26405402
chr1	26452802	26453480
chr1	26503774	26504116
chr1	26606010	26606916
chr1	26662490	26663449
chr1	26680300	26681044
chr1	26683699	26684105
chr1	26685361	26685865
chr1	26758357	26759055
chr1	26799054	26799782
chr1	26826731	26828024
chr1	26857506	26858217
chr1	26946744	26948179
chr1	27021837	27022352
chr1	27098128	27098523
chr1	27114157	27114886
chr1	27175726	27176318
chr1	27189136	27190061
chr1	27190489	27191241
chr1	27216424	27216973
chr1	27240525	27241164
chr1	27286452	27287157
chr1	27297407	27297793
chr1	27303286	27303623
chr1	27316826	27317656
chr1	27320103	27320441
chr1	27324151	27324809
chr1	27328907	27329141
chr1	27337575	27337915
chr1	27339119	27339689
chr1	27423818	27424309
chr1	27442269	27442859
chr1	27468024	27468566
chr1	27470838	27471483
chr1	27481550	27481954
chr1	27487838	27488648
chr1	27489362	27489914
chr1	27518355	27519834
chr1	27560540	27561290
chr1	27648328	27648962
chr1	27675445	27676590
chr1	27692015	27693691
chr1	27816207	27817420
chr1	27854467	27855420
chr1	27868814	27869421
chr1	27883351	27884932
chr1	27894732	27895517
chr1	27916458	27916882
chr1	28012961	28013551
chr1	28099551	28099856
chr1	28677807	28678490
chr1	28840582	28841046
chr1	28842376	28842875
chr1	28879092	28879807
chr1	28908012	28908695
chr1	28974631	28975197
chr1	29211306	29211770
chr1	29213448	29213775
chr1	29557204	29557723
chr1	29565667	29566167
chr1	29598167	29598667
chr1	31130348	31131031
chr1	31628094	31628664
chr1	31643685	31644167
chr1	31862864	31863404
chr1	31899138	31899654
chr1	31917535	31918217
chr1	32039361	32039853
chr1	32040877	32042356
chr1	32054299	32055407
chr1	32109997	32111057
chr1	32180807	32181467
chr1	32281439	32281867
chr1	32404036	32404485
chr1	32409913	32410319
chr1	32478917	32479654
chr1	32538378	32538856
chr1	32645016	32645832
chr1	32671056	32671317
chr1	32774432	32774820
chr1	32787305	32788153
chr1	32816574	32817284
chr1	33102696	33103206
chr1	33168498	33169129
chr1	33182103	33182614
chr1	33207811	33208147
chr1	33208468	33209058
chr1	33222786	33223341
chr1	33224872	33226153
chr1	33282788	33283801
chr1	33430284	33430706
chr1	33457897	33458375
chr1	33686338	33687098
chr1	34100387	34100800
chr1	35153955	35154509
chr1	35228910	35229629
chr1	35249032	35249677
chr1	35252138	35252677
chr1	35325198	35325602
chr1	35497151	35497713
chr1	36023080	36023543
chr1	36554280	36555084
chr1	36689455	36690506
chr1	36851332	36852469
chr1	36851332	36852469
chr1	36866507	36866918
chr1	36916068	36916451
chr1	37942000	37942527
chr1	37944621	37945906
chr1	38019813	38020207
chr1	38325056	38326012
chr1	39325392	39325802
chr1	39456463	39457053
chr1	39582554	39583316
chr1	39624901	39625245
chr1	39860254	39860550
chr1	40367679	40368226
chr1	40399964	40400336
chr1	40420629	40421080
chr1	40505202	40506756
chr1	40562671	40563210
chr1	40723382	40724069
chr1	41327950	41328454
chr1	41364972	41365606
chr1	41826615	41827027
chr1	41961755	41962361
chr1	41966142	41966550
chr1	42446630	42447362
chr1	42612645	42613006
chr1	42630319	42630747
chr1	42631207	42632077
chr1	42921838	42922587
chr1	43397533	43398231
chr1	43402002	43402735
chr1	43407424	43408195
chr1	43424395	43424951
chr1	43499961	43500393
chr1	43672387	43672891
chr1	43736057	43736876
chr1	43750971	43752210
chr1	43814477	43815241
chr1	43824397	43824765
chr1	43838622	43839269
chr1	43888837	43890026
chr1	44001934	44003142
chr1	44011138	44012199
chr1	44015618	44016212
chr1	44023327	44024398
chr1	44445317	44445761
chr1	44456939	44457900
chr1	44495351	44496507
chr1	44726279	44727144
chr1	44793239	44793930
chr1	45196728	45196961
chr1	45240909	45241316
chr1	45265443	45266068
chr1	45272922	45273984
chr1	45285285	45285729
chr1	45476309	45477157
chr1	45645541	45646248
chr1	45768924	45769958
chr1	45801499	45801941
chr1	45805551	45806120
chr1	45956750	45957283
chr1	45987368	45987962
chr1	46008218	46008782
chr1	46016298	46016851
chr1	46438815	46439370
chr1	46598235	46598896
chr1	46648678	46649566
chr1	46653124	46653580
chr1	46712671	46713449
chr1	46806102	46806617
chr1	46867763	46868193
chr1	46982617	46983240
chr1	46988273	46988557
chr1	46996393	46997044
chr1	47184604	47186029
chr1	47779787	47780195
chr1	47788859	47789684
chr1	47903179	47904024
chr1	47942943	47944331
chr1	48275459	48276087
chr1	48437233	48437679
chr1	49517200	49517733
chr1	49812445	49813461
chr1	51086457	51087060
chr1	51537784	51538210
chr1	51749598	51750480
chr1	51762468	51762985
chr1	51985946	51986482
chr1	52344275	52344892
chr1	52442621	52443258
chr1	52642308	52642621
chr1	53581481	53582004
chr1	53791681	53792495
chr1	54422828	54423350
chr1	54481447	54482485
chr1	54752808	54753313
chr1	54762913	54765111
chr1	54836965	54837819
chr1	55007202	55008545
chr1	55029924	55031044
chr1	55106729	55107288
chr1	55114757	55115232
chr1	55181186	55181740
chr1	55260519	55260881
chr1	55261769	55262329
chr1	55266821	55267399
chr1	55894529	55895273
chr1	55913125	55913634
chr1	56959911	56960418
chr1	56971886	56972289
chr1	57745834	57746207
chr1	58507244	58507938
chr1	59042012	59043389
chr1	59049662	59050561
chr1	59085887	59086717
chr1	59249660	59250444
chr1	59279992	59282441
chr1	59279992	59282441
chr1	59350875	59351452
chr1	59362276	59362693
chr1	59394153	59394671
chr1	59395193	59396012
chr1	59398332	59399011
chr1	59517734	59518285
chr1	59605064	59605389
chr1	60357774	60359120
chr1	61105776	61106324
chr1	61598608	61599107
chr1	61916008	61916640
chr1	62190604	62191170
chr1	62207827	62208354
chr1	62901719	62902893
chr1	64437025	64437682
chr1	64517340	64518273
chr1	65152429	65152897
chr1	66229652	66230141
chr1	67390336	67391216
chr1	67395619	67396222
chr1	68000188	68000688
chr1	68097292	68097840
chr1	68201627	68202325
chr1	68215113	68215749
chr1	68281372	68282482
chr1	68624492	68624841
chr1	70671168	70671494
chr1	72948465	72949069
chr1	74268980	74269462
chr1	75577999	75578589
chr1	75841573	75842094
chr1	77013550	77013913
chr1	77470695	77471339
chr1	78148969	78149395
chr1	78679904	78680591
chr1	78703004	78703681
chr1	80858098	80858679
chr1	84736956	84738672
chr1	84971667	84972435
chr1	85742089	85742748
chr1	85926203	85926797
chr1	86094752	86095286
chr1	86570720	86571249
chr1	86887511	86888110
chr1	87170072	87170882
chr1	87224276	87224728
chr1	87240143	87240688
chr1	87258423	87259108
chr1	87458496	87459413
chr1	87569843	87570363
chr1	87796905	87797585
chr1	88271638	88272068
chr1	89239654	89240295
chr1	89451475	89451783
chr1	89458019	89458945
chr1	89487408	89487735
chr1	89554090	89554699
chr1	90528473	90528706
chr1	91966135	91966985
chr1	92270191	92270686
chr1	92292513	92293400
chr1	92355416	92355952
chr1	92792013	92792523
chr1	92907147	92907952
chr1	93790005	93790769
chr1	93811147	93811705
chr1	93905648	93906212
chr1	93907757	93908282
chr1	93914095	93915075
chr1	94032922	94033571
chr1	94047491	94047937
chr1	94050545	94051253
chr1	94137627	94138120
chr1	94138773	94139191
chr1	94311695	94312222
chr1	94847811	94848319
chr1	94883402	94883775
chr1	95086903	95087325
chr1	95699383	95700003
chr1	97187371	97187666
chr1	99127285	99128013
chr1	99340378	99340873
chr1	100054576	100055122
chr1	100169859	100170212
chr1	100435421	100436057
chr1	100816907	100817844
chr1	101723460	101723983
chr1	101730209	101730621
chr1	101918593	101918921
chr1	102511294	102511869
chr1	105894146	105894528
chr1	106175354	106175904
chr1	107540962	107541467
chr1	108709943	108710606
chr1	109288998	109289752
chr1	109419248	109419871
chr1	109680706	109681337
chr1	109756333	109756671
chr1	109816983	109817967
chr1	109825606	109826189
chr1	110036549	110037123
chr1	110090988	110091766
chr1	110198645	110198895
chr1	110306287	110307014
chr1	110490722	110491285
chr1	110503041	110503466
chr1	110739605	110739882
chr1	110880535	110882274
chr1	110927681	110928123
chr1	111644270	111645478
chr1	111744838	111745470
chr1	111745726	111747459
chr1	112135166	112136025
chr1	112281571	112282404
chr1	112297946	112298631
chr1	112641662	112642284
chr1	112933423	112933933
chr1	113008642	113009108
chr1	113148326	113148824
chr1	113247573	113248257
chr1	113411858	113412550
chr1	113447458	113448673
chr1	113554956	113556054
chr1	113615329	113616132
chr1	113760197	113760827
chr1	113798123	113798664
chr1	113850885	113851445
chr1	113931258	113931903
chr1	113932539	113933255
chr1	113981635	113982209
chr1	113999701	114000130
chr1	114118876	114119386
chr1	114354835	114355247
chr1	114429866	114430786
chr1	114447332	114448099
chr1	115259164	115259713
chr1	115605139	115605730
chr1	115612227	115612883
chr1	116184912	116185514
chr1	116213379	116214378
chr1	116257097	116257868
chr1	116519166	116519721
chr1	116915138	116915871
chr1	117051507	117052143
chr1	117112352	117112634
chr1	117185252	117185713
chr1	117186065	117186420
chr1	117602559	117602936
chr1	118148132	118148877
chr1	118217340	118218118
chr1	119544492	119545025
chr1	119683077	119683523
chr1	120354077	120354432
chr1	121143269	121143879
chr1	143913268	143913611
chr1	144533644	144534450
chr1	144931858	144932808
chr1	145208904	145209418
chr1	145382690	145383005
chr1	145455329	145456385
chr1	145507422	145508169
chr1	145516043	145516569
chr1	145542591	145543120
chr1	145548773	145549365
chr1	145556760	145557157
chr1	145575078	145576253
chr1	145610859	145611334
chr1	146373345	146373774
chr1	146643456	146644521
chr1	146708753	146710112
chr1	146714117	146714760
chr1	146798888	146799515
chr1	146895033	146895663
chr1	147071072	147071859
chr1	147142421	147143039
chr1	147305206	147305989
chr1	147735410	147735991
chr1	147806452	147807314
chr1	148240943	148242030
chr1	149150983	149151637
chr1	149192682	149193318
chr1	149223513	149224196
chr1	149858003	149858690
chr1	149908162	149909626
chr1	149910855	149911553
chr1	149982451	149983028
chr1	150039248	150039874
chr1	150241002	150241842
chr1	150459566	150459924
chr1	150501352	150502000
chr1	150504710	150505253
chr1	150533740	150534959
chr1	150551797	150552556
chr1	150643762	150644165
chr1	150943666	150944588
chr1	150953644	150954803
chr1	150985360	150985867
chr1	151162480	151162904
chr1	151167494	151168346
chr1	151253587	151255091
chr1	151344843	151345505
chr1	151482173	151483025
chr1	151483535	151484020
chr1	151485260	151486804
chr1	151512028	151513181
chr1	151519543	151520324
chr1	151521287	151521623
chr1	151541060	151541704
chr1	151542120	151542653
chr1	151584301	151584687
chr1	151809128	151809808
chr1	151812020	151812660
chr1	151917979	151918665
chr1	151943005	151943653
chr1	151947512	151948260
chr1	151960764	151961539
chr1	151961819	151962745
chr1	151963335	151963662
chr1	151964691	151965702
chr1	151966023	151967174
chr1	151996640	151997121
chr1	152006914	152007843
chr1	152008272	152009841
chr1	152012359	152012940
chr1	152020146	152021472
chr1	152137209	152137670
chr1	152140296	152140801
chr1	152365466	152365843
chr1	152485235	152486058
chr1	152939599	152940106
chr1	153488093	153488946
chr1	153504840	153507063
chr1	153507844	153509508
chr1	153510827	153511321
chr1	153513009	153513534
chr1	153517292	153518255
chr1	153538848	153539673
chr1	153540887	153541408
chr1	153549958	153550342
chr1	153580598	153582517
chr1	153583352	153583595
chr1	153585260	153586027
chr1	153588603	153590499
chr1	153605489	153607056
chr1	153630954	153631402
chr1	153699902	153700520
chr1	153755892	153756599
chr1	153930690	153931407
chr1	153935625	153936909
chr1	153973707	153974621
chr1	154129940	154130730
chr1	154154576	154156088
chr1	154324342	154326197
chr1	154358031	154358428
chr1	154377485	154377954
chr1	154390512	154391223
chr1	154732902	154733339
chr1	154904509	154904975
chr1	154908748	154910110
chr1	154933748	154934766
chr1	154973175	154974980
chr1	154976298	154976711
chr1	154979417	154980128
chr1	154980498	154980769
chr1	154989368	154990431
chr1	155022827	155023696
chr1	155035239	155037029
chr1	155042140	155042804
chr1	155043296	155044213
chr1	155049822	155050138
chr1	155051058	155051523
chr1	155052994	155053731
chr1	155054230	155056263
chr1	155056655	155058754
chr1	155107441	155108516
chr1	155145685	155145990
chr1	155157329	155158311
chr1	155162459	155164832
chr1	155178385	155179245
chr1	155213984	155214859
chr1	155225074	155225765
chr1	155231851	155232673
chr1	155278323	155278895
chr1	155290444	155291088
chr1	155532409	155533092
chr1	155579133	155580081
chr1	155658495	155658950
chr1	155715136	155715621
chr1	155881003	155881403
chr1	155904132	155904509
chr1	155910300	155911603
chr1	155931617	155932166
chr1	155948029	155948515
chr1	155973040	155973681
chr1	156023628	156024857
chr1	156030575	156031166
chr1	156031806	156032506
chr1	156066386	156066827
chr1	156073619	156074217
chr1	156083707	156085163
chr1	156085701	156086123
chr1	156092524	156094037
chr1	156094858	156097493
chr1	156099877	156100565
chr1	156148866	156149250
chr1	156182463	156182966
chr1	156217705	156218001
chr1	156251896	156252907
chr1	156253610	156254336
chr1	156308029	156308684
chr1	156426466	156427803
chr1	156470494	156471609
chr1	156474802	156475361
chr1	156540991	156542687
chr1	156556823	156557172
chr1	156646710	156647359
chr1	156662475	156663046
chr1	156675576	156676377
chr1	156710678	156711314
chr1	156716396	156717027
chr1	156718275	156718819
chr1	156720117	156720413
chr1	156721447	156722153
chr1	156736799	156737646
chr1	156783677	156784349
chr1	156862044	156862643
chr1	156890112	156890467
chr1	156915931	156916250
chr1	157108048	157108602
chr1	157124773	157125321
chr1	157210306	157210869
chr1	159750448	159751360
chr1	159869723	159870539
chr1	159880169	159880512
chr1	159884040	159884558
chr1	159885997	159886839
chr1	159892845	159893843
chr1	159894145	159895639
chr1	159906255	159907504
chr1	159909053	159909909
chr1	159915269	159916211
chr1	159930369	159931862
chr1	159940718	159941204
chr1	160001622	160002081
chr1	160312841	160313231
chr1	160377650	160378388
chr1	160751060	160751639
chr1	160959554	160960276
chr1	160983453	160984257
chr1	160990417	160991899
chr1	161007945	161009042
chr1	161015526	161016098
chr1	161052883	161054164
chr1	161055861	161056739
chr1	161067334	161067776
chr1	161087662	161088262
chr1	161102000	161103116
chr1	161123782	161124069
chr1	161135673	161136600
chr1	161146841	161147512
chr1	161359606	161360355
chr1	162176998	162177480
chr1	162216954	162217469
chr1	162254832	162255323
chr1	162351083	162352123
chr1	163165784	163166368
chr1	163228132	163228676
chr1	163291392	163292148
chr1	163615293	163615943
chr1	163640752	163641651
chr1	164580707	164581539
chr1	164582408	164582872
chr1	164592158	164592788
chr1	164620778	164621309
chr1	164622046	164622660
chr1	164629080	164629902
chr1	164652464	164652992
chr1	165599789	165601581
chr1	165615072	165615824
chr1	165716964	165717224
chr1	165820277	165820762
chr1	165879974	165880939
chr1	166136111	166136846
chr1	166572422	166572999
chr1	166808286	166808777
chr1	166844897	166845866
chr1	167051727	167052695
chr1	167059615	167060008
chr1	167090204	167091496
chr1	167132038	167132814
chr1	167189005	167190202
chr1	167410575	167411765
chr1	167683318	167684137
chr1	167690843	167691875
chr1	168085111	168086221
chr1	168105033	168105891
chr1	168115626	168116422
chr1	168147795	168148742
chr1	168377698	168378458
chr1	168445798	168446313
chr1	168678750	168679735
chr1	168721409	168721899
chr1	168770653	168770999
chr1	168773155	168773520
chr1	168889638	168890208
chr1	168929256	168930266
chr1	169029171	169029749
chr1	169069680	169070473
chr1	169071964	169073221
chr1	169074649	169075780
chr1	169078951	169079451
chr1	169336912	169337541
chr1	169498470	169498935
chr1	169534814	169535541
chr1	169860481	169860951
chr1	169862859	169863571
chr1	170032113	170032922
chr1	170043471	170044222
chr1	170082237	170082899
chr1	170865213	170865664
chr1	171342476	171343317
chr1	171366011	171366497
chr1	171750233	171750844
chr1	171882576	171882873
chr1	171885308	171886011
chr1	172025057	172025587
chr1	172325733	172326061
chr1	172329633	172330253
chr1	172400773	172401300
chr1	172418033	172418803
chr1	172420134	172420675
chr1	172955878	172956522
chr1	173793523	173794261
chr1	173836996	173838182
chr1	173991409	173991930
chr1	174207845	174208693
chr1	174922471	174923528
chr1	175161563	175162482
chr1	176176383	176176874
chr1	177188761	177189688
chr1	177554582	177555172
chr1	178008889	178009514
chr1	178207854	178208207
chr1	178289343	178290024
chr1	178505940	178506954
chr1	178624917	178625314
chr1	178986017	178986663
chr1	178995274	178995712
chr1	179334083	179335285
chr1	179518347	179518727
chr1	179560582	179561436
chr1	180096041	180096445
chr1	180126784	180127494
chr1	180137106	180137634
chr1	180138024	180138793
chr1	180139619	180140165
chr1	180471401	180472160
chr1	180991825	180992511
chr1	181012122	181012713
chr1	181074014	181074506
chr1	181081502	181082501
chr1	181128576	181129825
chr1	181220208	181220836
chr1	181420826	181421644
chr1	181616495	181617334
chr1	181998488	181999509
chr1	182014555	182015012
chr1	182089647	182090450
chr1	182150255	182150955
chr1	182152677	182153163
chr1	182204880	182205831
chr1	182218296	182218790
chr1	182269201	182269636
chr1	182360310	182361111
chr1	182808259	182808850
chr1	183056017	183056577
chr1	183058016	183058620
chr1	183129045	183129845
chr1	183145402	183146081
chr1	183154928	183155502
chr1	183430619	183431147
chr1	183436587	183437370
chr1	183439314	183439644
chr1	183440249	183441406
chr1	183440249	183441406
chr1	183554163	183554658
chr1	183558044	183558543
chr1	183962036	183962839
chr1	184355538	184356420
chr1	184394644	184395731
chr1	184406421	184407006
chr1	184559494	184560003
chr1	184581313	184581738
chr1	184970515	184971185
chr1	185126055	185126765
chr1	185226271	185227217
chr1	185285993	185286905
chr1	185554896	185555432
chr1	186051446	186051816
chr1	186132062	186132646
chr1	186344217	186344837
chr1	186547504	186548059
chr1	186649213	186649808
chr1	190308598	190309690
chr1	190724593	190725145
chr1	191373444	191373912
chr1	192469648	192470347
chr1	192976888	192977399
chr1	193028403	193029264
chr1	193090739	193091638
chr1	193180538	193180985
chr1	193279591	193280077
chr1	193400467	193401106
chr1	196109659	196110106
chr1	197744439	197744794
chr1	197871575	197872036
chr1	198125818	198126886
chr1	198283914	198284680
chr1	198326263	198326651
chr1	198412415	198412869
chr1	198418371	198419132
chr1	198903913	198905163
chr1	200589599	200590196
chr1	200638420	200639704
chr1	200862472	200863117
chr1	200865275	200866332
chr1	200874856	200875459
chr1	200877254	200878194
chr1	200988362	200988948
chr1	201029086	201029555
chr1	201269097	201269546
chr1	201276803	201277417
chr1	201366040	201366648
chr1	201368305	201369140
chr1	201375907	201376685
chr1	201404744	201405194
chr1	201449473	201450133
chr1	201476032	201476663
chr1	201482101	201482470
chr1	201683786	201684136
chr1	201977129	201977598
chr1	201978407	201979967
chr1	201986768	201988714
chr1	201991954	201992661
chr1	202003640	202004789
chr1	202015216	202016479
chr1	202025538	202027813
chr1	202041302	202042035
chr1	202045111	202046331
chr1	202053854	202055471
chr1	202055876	202056535
chr1	202074861	202075979
chr1	202076368	202077966
chr1	202082646	202083448
chr1	202087624	202088340
chr1	202168258	202169697
chr1	202760069	202760688
chr1	202777093	202777921
chr1	202779648	202780180
chr1	202857674	202858381
chr1	202895950	202896543
chr1	203296349	203297082
chr1	203505838	203506481
chr1	203661606	203662651
chr1	203830496	203830961
chr1	204049323	204049959
chr1	204062205	204062856
chr1	204070948	204072346
chr1	204073292	204074247
chr1	204182760	204183582
chr1	204195512	204195935
chr1	204288561	204288912
chr1	204300389	204300846
chr1	204346326	204346715
chr1	204347102	204347600
chr1	204412341	204412741
chr1	204417410	204418067
chr1	204419571	204420456
chr1	204462407	204464164
chr1	204485364	204485925
chr1	204721114	204721599
chr1	205253896	205254222
chr1	205288663	205289117
chr1	205324005	205324618
chr1	205410107	205410482
chr1	205718022	205718889
chr1	205902626	205903183
chr1	206227883	206228503
chr1	206317226	206317727
chr1	206319169	206320168
chr1	206642766	206643498
chr1	206808514	206809089
chr1	207180661	207181232
chr1	207193353	207193856
chr1	207197611	207198014
chr1	207200526	207200975
chr1	207205952	207206405
chr1	207271031	207271492
chr1	207405832	207406520
chr1	207477992	207478608
chr1	207494143	207495380
chr1	207999830	208000401
chr1	208021570	208022029
chr1	208038241	208038617
chr1	208305592	208306227
chr1	208327992	208328428
chr1	208357466	208358168
chr1	208374450	208374966
chr1	208376516	208377295
chr1	208409254	208409993
chr1	208412849	208413290
chr1	208618784	208619453
chr1	209824651	209824892
chr1	209825609	209826736
chr1	209979293	209979827
chr1	210001116	210001531
chr1	210369669	210370016
chr1	210406944	210407797
chr1	211431938	211432840
chr1	211688279	211689193
chr1	211690341	211690936
chr1	211715259	211716020
chr1	211752493	211753243
chr1	211840411	211841176
chr1	211848979	211849600
chr1	212098307	212098736
chr1	212102341	212102660
chr1	212208314	212208812
chr1	212731764	212732523
chr1	212780053	212780768
chr1	212781648	212782167
chr1	212964880	212965358
chr1	213000648	213001490
chr1	213746279	213746702
chr1	213952568	213953197
chr1	214120411	214121062
chr1	214129467	214130156
chr1	214223856	214224681
chr1	215156418	215157171
chr1	215809059	215809894
chr1	217552702	217553356
chr1	218337446	218337741
chr1	218458282	218458844
chr1	218564048	218564375
chr1	219483281	219483969
chr1	220012778	220013299
chr1	220036893	220037474
chr1	220267261	220268035
chr1	220617800	220618507
chr1	220863437	220863812
chr1	221508560	221509197
chr1	221916015	221916565
chr1	221947671	221948621
chr1	222773328	222774111
chr1	222817395	222817794
chr1	223173894	223174487
chr1	223316172	223316753
chr1	223826942	223827355
chr1	223842566	223843247
chr1	223853206	223853914
chr1	223888637	223888904
chr1	223952782	223953438
chr1	223959410	223960314
chr1	223981442	223982256
chr1	224180183	224180642
chr1	224401278	224401913
chr1	224544371	224545307
chr1	224691039	224691758
chr1	224811498	224811932
chr1	225068127	225068550
chr1	225416462	225416960
chr1	225615738	225616214
chr1	225632583	225634292
chr1	225636915	225637626
chr1	225651099	225651828
chr1	226000886	226001733
chr1	226067402	226067987
chr1	226069238	226070432
chr1	226078930	226079426
chr1	226186859	226187585
chr1	226233978	226234582
chr1	226309293	226310683
chr1	226315323	226316109
chr1	226369433	226370315
chr1	226537546	226538525
chr1	226595390	226596204
chr1	227002829	227003445
chr1	227058050	227058974
chr1	227132263	227132765
chr1	227505985	227506629
chr1	227510374	227511691
chr1	227544397	227545463
chr1	227576307	227576897
chr1	227583930	227585453
chr1	227589180	227590271
chr1	227922850	227923313
chr1	227975499	227976379
chr1	228133885	228134828
chr1	228246877	228248492
chr1	228269899	228270512
chr1	228296764	228297354
chr1	228318534	228319024
chr1	228327456	228328257
chr1	228352954	228354420
chr1	228362164	228362482
chr1	228400801	228401455
chr1	228463411	228463880
chr1	228536371	228536785
chr1	228646217	228647216
chr1	228674171	228675107
chr1	228693500	228693965
chr1	228782314	228782779
chr1	228918388	228919156
chr1	228945124	228946319
chr1	228973607	228974885
chr1	228996137	228997179
chr1	229200196	229200663
chr1	229229347	229230057
chr1	229357028	229357766
chr1	229478026	229478797
chr1	229643998	229644386
chr1	229694359	229695095
chr1	229761770	229762289
chr1	229842941	229843353
chr1	230240381	230241051
chr1	230340487	230340873
chr1	230844221	230844688
chr1	230882211	230883235
chr1	231074657	231075200
chr1	231369340	231370166
chr1	232758078	232758708
chr1	232814049	232814672
chr1	232818000	232818454
chr1	232972840	232973266
chr1	233038710	233039241
chr1	233102346	233102795
chr1	233462806	233463323
chr1	233503024	233503580
chr1	233790385	233791443
chr1	233804461	233804887
chr1	233824483	233825130
chr1	234626657	234627333
chr1	234735448	234736702
chr1	234738301	234738818
chr1	234748136	234748798
chr1	234767374	234768086
chr1	234775014	234775735
chr1	234847845	234848242
chr1	234858863	234860793
chr1	234907759	234908571
chr1	234952904	234953464
chr1	235001884	235002854
chr1	235092899	235093422
chr1	235096068	235097161
chr1	235110743	235111331
chr1	235134144	235134647
chr1	235242470	235243270
chr1	235491555	235492245
chr1	235530532	235531085
chr1	235667680	235668130
chr1	236786813	236787504
chr1	237924174	237924746
chr1	237984052	237984436
chr1	239376110	239376655
chr1	239979374	239979902
chr1	240443899	240444368
chr1	240947002	240947419
chr1	241319847	241320317
chr1	241355182	241355722
chr1	241365814	241366129
chr1	242011107	242011583
chr1	242161671	242162305
chr1	243264909	243265405
chr1	243418311	243419679
chr1	244614991	244615719
chr1	244624430	244625188
chr1	244998018	244999262
chr1	245421639	245421984
chr1	246701079	246701582
chr1	246859725	246860302
chr1	246873161	246873537
chr1	247094915	247095631
chr1	247274924	247275744
chr1	247373718	247374449
chr1	247564454	247564878
chr1	249157050	249157754
chr10	133024	133656
chr10	592744	593299
chr10	1017525	1017866
chr10	1102241	1102879
chr10	1474347	1474849
chr10	2357057	2357692
chr10	3027826	3028997
chr10	3109244	3110649
chr10	3133233	3134078
chr10	3214679	3215899
chr10	3509597	3510623
chr10	3528469	3528906
chr10	3782262	3782959
chr10	3786502	3786807
chr10	3797094	3797533
chr10	3805046	3805618
chr10	3819061	3819646
chr10	3824641	3825308
chr10	4100038	4100482
chr10	4109598	4110373
chr10	4705160	4705777
chr10	4868083	4869038
chr10	4981939	4982544
chr10	4983698	4984276
chr10	5062308	5062761
chr10	5079906	5080469
chr10	5113410	5114446
chr10	5151788	5152477
chr10	5190053	5190932
chr10	5237763	5238709
chr10	5333686	5334332
chr10	5488285	5488642
chr10	5530115	5531131
chr10	5545381	5545797
chr10	5560151	5560549
chr10	5586342	5586876
chr10	5587422	5588351
chr10	5588712	5589365
chr10	5589718	5591202
chr10	5596160	5596870
chr10	5651706	5652374
chr10	5652632	5653026
chr10	5855223	5855983
chr10	5874856	5875237
chr10	5931557	5932257
chr10	5993117	5993961
chr10	6095700	6096493
chr10	6205411	6206229
chr10	6244553	6245291
chr10	6313610	6314292
chr10	6332881	6333454
chr10	6356589	6357259
chr10	7306171	7306831
chr10	7728308	7728887
chr10	8408052	8408889
chr10	8658063	8658587
chr10	9279960	9280496
chr10	9281201	9281751
chr10	9304767	9305205
chr10	9866460	9867964
chr10	11705740	11706577
chr10	11712322	11712759
chr10	11726482	11727039
chr10	11729293	11730188
chr10	11757984	11758532
chr10	11916523	11917070
chr10	11917406	11918260
chr10	12084790	12085543
chr10	12110436	12111164
chr10	12171219	12171861
chr10	13149538	13150373
chr10	13344098	13344705
chr10	13424455	13425844
chr10	13456922	13457703
chr10	14592313	14592888
chr10	14595632	14596540
chr10	14995900	14996537
chr10	15373330	15373978
chr10	15402364	15402939
chr10	16478653	16479149
chr10	16859256	16859850
chr10	17243377	17244076
chr10	17271899	17272928
chr10	17430013	17430584
chr10	18899336	18899793
chr10	18916295	18917016
chr10	19145490	19146022
chr10	20820068	20820887
chr10	21463052	21463789
chr10	21480339	21480985
chr10	21483343	21483919
chr10	21785805	21786402
chr10	22016450	22017070
chr10	22031690	22032108
chr10	22040157	22040748
chr10	22535307	22536278
chr10	24123018	24123568
chr10	24527270	24527946
chr10	24544049	24544472
chr10	24758907	24759450
chr10	24772580	24773086
chr10	24841263	24841736
chr10	24969865	24970528
chr10	25012852	25013826
chr10	25138098	25138768
chr10	25402298	25403196
chr10	26369641	26370757
chr10	26637539	26638405
chr10	26650253	26651073
chr10	26655768	26656608
chr10	26805502	26806551
chr10	26985822	26986558
chr10	27444040	27444500
chr10	28591738	28592304
chr10	28967963	28968315
chr10	29017136	29017814
chr10	29127885	29128215
chr10	29228293	29229246
chr10	29280220	29280943
chr10	29924934	29925576
chr10	30024556	30025293
chr10	30449427	30449978
chr10	30676621	30677152
chr10	30712232	30712673
chr10	30720179	30720881
chr10	30811430	30811989
chr10	30894690	30895200
chr10	30971169	30971800
chr10	31007505	31008408
chr10	31320440	31321620
chr10	31892138	31892787
chr10	32229719	32230368
chr10	32428260	32428677
chr10	32452777	32453062
chr10	32734925	32735385
chr10	33271111	33271846
chr10	33298967	33299537
chr10	34502139	34502792
chr10	34608185	34608926
chr10	34716073	34716723
chr10	35379134	35379595
chr10	35415585	35416163
chr10	35736611	35737438
chr10	43133298	43134249
chr10	43160482	43161267
chr10	43277812	43278321
chr10	43811048	43811418
chr10	43891220	43892317
chr10	43899348	43899732
chr10	43904208	43905138
chr10	43932189	43932708
chr10	43950763	43951439
chr10	44607770	44608668
chr10	45454761	45455163
chr10	46090116	46090630
chr10	46222383	46222937
chr10	46990622	46991066
chr10	47009252	47010094
chr10	47075136	47075785
chr10	47108397	47108839
chr10	47125843	47126108
chr10	47655580	47656337
chr10	48332002	48332718
chr10	49199778	49200169
chr10	50626850	50627566
chr10	50707299	50708150
chr10	52177898	52178388
chr10	52383514	52384869
chr10	54073739	54074087
chr10	54258982	54259532
chr10	60015697	60016668
chr10	60028392	60028962
chr10	60094447	60094916
chr10	60228221	60228723
chr10	61724803	61725405
chr10	62493137	62493397
chr10	62537939	62538268
chr10	63372020	63372567
chr10	63381208	63381737
chr10	63541735	63542196
chr10	63596163	63596694
chr10	63597026	63597751
chr10	63783975	63784450
chr10	65471781	65472378
chr10	69251827	69252656
chr10	69644062	69644500
chr10	69834353	69835164
chr10	70883441	70884021
chr10	70989128	70989600
chr10	71077858	71078671
chr10	71120383	71121416
chr10	71177749	71178184
chr10	71209448	71209934
chr10	71210569	71211862
chr10	71218412	71219288
chr10	71389686	71390166
chr10	71629040	71629635
chr10	71892160	71892982
chr10	71930217	71930579
chr10	71987543	71988070
chr10	71992841	71993741
chr10	72015390	72016455
chr10	72164375	72165158
chr10	72202150	72202392
chr10	72338222	72338730
chr10	72576102	72576507
chr10	72611920	72612367
chr10	72971978	72972363
chr10	72977708	72978234
chr10	73006111	73007094
chr10	73098687	73099345
chr10	73099694	73100301
chr10	73397858	73398980
chr10	73526396	73527598
chr10	73533117	73533847
chr10	73633633	73633972
chr10	73634503	73635140
chr10	73857393	73858047
chr10	74008293	74008930
chr10	74020131	74020775
chr10	74031846	74033750
chr10	74057508	74058210
chr10	74079229	74080052
chr10	74114263	74115141
chr10	74385724	74386214
chr10	74446435	74447162
chr10	75006582	75007346
chr10	75012196	75012803
chr10	75255042	75255981
chr10	75350967	75352090
chr10	75631574	75632052
chr10	75647313	75647803
chr10	75692110	75692664
chr10	75700311	75700747
chr10	75725851	75726434
chr10	75757239	75758062
chr10	75815479	75816407
chr10	76581146	76582336
chr10	76585502	76586376
chr10	76682612	76683094
chr10	76969714	76970537
chr10	76993845	76994730
chr10	77005309	77005818
chr10	77161334	77163673
chr10	77164062	77165474
chr10	77190001	77190336
chr10	77536387	77536730
chr10	77796603	77797120
chr10	78203640	78204254
chr10	79169748	79170303
chr10	79239617	79240217
chr10	79669456	79669839
chr10	80348041	80348503
chr10	80349437	80349732
chr10	80732985	80734313
chr10	80818678	80819404
chr10	80853540	80853979
chr10	80909713	80910153
chr10	80917282	80917765
chr10	80947848	80948704
chr10	81074502	81075185
chr10	81118485	81118911
chr10	81923420	81924113
chr10	81931004	81931528
chr10	81947169	81947806
chr10	81963192	81964443
chr10	81965018	81965817
chr10	81966813	81967554
chr10	82189076	82189836
chr10	82218850	82219232
chr10	82231492	82231751
chr10	82265095	82266351
chr10	85779841	85780252
chr10	86547777	86548149
chr10	87170198	87170861
chr10	88159696	88160820
chr10	88295090	88295566
chr10	88345166	88345516
chr10	88730716	88731408
chr10	88852372	88852892
chr10	88854956	88855372
chr10	89461149	89461704
chr10	89621781	89622443
chr10	90145110	90146364
chr10	90188191	90188778
chr10	90463004	90463471
chr10	91204350	91205036
chr10	91460953	91461558
chr10	93882782	93883455
chr10	94731777	94732595
chr10	95048690	95049143
chr10	95143769	95144350
chr10	95184777	95185251
chr10	95199462	95200080
chr10	95205240	95205631
chr10	95225485	95226563
chr10	95230426	95231112
chr10	95235379	95236000
chr10	95255920	95256671
chr10	95310016	95311118
chr10	95351225	95351717
chr10	95802207	95802705
chr10	96436230	96436640
chr10	97023839	97024633
chr10	97026491	97026891
chr10	97849449	97850181
chr10	98345828	98346276
chr10	98370557	98370976
chr10	98371782	98372599
chr10	98480233	98480611
chr10	98492665	98493191
chr10	98507814	98508533
chr10	98829810	98830197
chr10	99094268	99094957
chr10	99096513	99097149
chr10	99446877	99447582
chr10	99478258	99478979
chr10	100074199	100074722
chr10	100164125	100164704
chr10	100206577	100207008
chr10	101155437	101156086
chr10	101190449	101190860
chr10	101686549	101687032
chr10	101779825	101780366
chr10	102060749	102061545
chr10	102130341	102131490
chr10	102672312	102673145
chr10	102729797	102730394
chr10	102730853	102731593
chr10	102792036	102792784
chr10	102820674	102821631
chr10	102825754	102826676
chr10	102829876	102830257
chr10	103329627	103330441
chr10	103454023	103454298
chr10	103538431	103539200
chr10	103577739	103578573
chr10	103590113	103591000
chr10	103746460	103746906
chr10	103824600	103825363
chr10	103911192	103912290
chr10	104153783	104154462
chr10	104180562	104181504
chr10	104223104	104223388
chr10	104261733	104262021
chr10	104401861	104402922
chr10	104405629	104406487
chr10	104417409	104418582
chr10	104420904	104421418
chr10	104474004	104474629
chr10	104503308	104503863
chr10	104874594	104875056
chr10	104998691	104999113
chr10	105001006	105001776
chr10	105413360	105413980
chr10	105475914	105476519
chr10	105505063	105505978
chr10	105531978	105532836
chr10	105544643	105545098
chr10	105553438	105554505
chr10	105596702	105597122
chr10	105649805	105650742
chr10	105877442	105878135
chr10	105881273	105881989
chr10	105991971	105992376
chr10	106002829	106003250
chr10	106012632	106013381
chr10	111728652	111729069
chr10	111755602	111756294
chr10	111762920	111763357
chr10	111827624	111828069
chr10	111836448	111837064
chr10	111986982	111987269
chr10	112155590	112156121
chr10	112158377	112158789
chr10	112257233	112257706
chr10	112599997	112600479
chr10	112605155	112605836
chr10	112617181	112617674
chr10	112617999	112618567
chr10	113899906	113900380
chr10	113943395	113943669
chr10	114278786	114279407
chr10	114510306	114510944
chr10	114529005	114529720
chr10	114538255	114538726
chr10	114675211	114675667
chr10	114829111	114829704
chr10	114853212	114854045
chr10	115253758	115254132
chr10	115311813	115312204
chr10	115315408	115316001
chr10	115385189	115385614
chr10	115438833	115439848
chr10	115511907	115512699
chr10	115707156	115707906
chr10	115719227	115719802
chr10	115720185	115721538
chr10	115786437	115787221
chr10	116131871	116132336
chr10	116259283	116259967
chr10	116266977	116267760
chr10	116278949	116280022
chr10	116280312	116280773
chr10	116298130	116298591
chr10	116306663	116307440
chr10	116407440	116407861
chr10	116539501	116540050
chr10	118764169	118764961
chr10	119822206	119822832
chr10	120457777	120458456
chr10	120850460	120850983
chr10	120993397	120993731
chr10	120997559	120998174
chr10	121030311	121031934
chr10	121076338	121077055
chr10	121651829	121652227
chr10	121656547	121657385
chr10	122700114	122700364
chr10	122737991	122740041
chr10	122756058	122756615
chr10	122762124	122762960
chr10	122918568	122919207
chr10	123365822	123366393
chr10	123370250	123370806
chr10	123792941	123793567
chr10	123822452	123823455
chr10	123900736	123901018
chr10	123942499	123942843
chr10	124053210	124054016
chr10	124098394	124098946
chr10	124768114	124768662
chr10	124898962	124899996
chr10	126043376	126043944
chr10	126069527	126070047
chr10	126149982	126150763
chr10	126211446	126211797
chr10	126315426	126316127
chr10	126734248	126734759
chr10	126753200	126753779
chr10	126790781	126791696
chr10	126812123	126812725
chr10	126840103	126841199
chr10	126845172	126845960
chr10	126849394	126850263
chr10	127379751	127380327
chr10	127600398	127600980
chr10	129679484	129679970
chr10	129687062	129687704
chr10	129955110	129955692
chr10	131908603	131909676
chr10	133951522	133952030
chr10	134121780	134122341
chr10	134145456	134145941
chr10	134212485	134213085
chr10	134215069	134215773
chr10	134217229	134217657
chr10	134232116	134232939
chr10	134234863	134235570
chr10	134266504	134266971
chr10	134272135	134273487
chr10	134274961	134275557
chr10	134330160	134331171
chr10	134350789	134351361
chr10	134404596	134405071
chr10	134406161	134406904
chr10	134498615	134499487
chr10	134555499	134556034
chr10	134565835	134566463
chr10	134587714	134588391
chr10	134588758	134589404
chr10	134716163	134717113
chr10	134822726	134823422
chr10	134923307	134924175
chr10	135059201	135059645
chr10	135070956	135071961
chr10	135074726	135076628
chr10	135088426	135088839
chr10	135160564	135160930
chr10	135173152	135174185
chr10	135177801	135179022
chr11	207238	207941
chr11	208483	209018
chr11	309123	309706
chr11	355829	356442
chr11	364207	364782
chr11	393274	394973
chr11	406456	407150
chr11	416584	417680
chr11	441801	442182
chr11	447999	448797
chr11	460222	461181
chr11	487890	488227
chr11	506340	507630
chr11	517858	519124
chr11	568332	569100
chr11	586119	586562
chr11	614665	616176
chr11	623954	624254
chr11	624719	626268
chr11	705665	708274
chr11	712670	713445
chr11	720446	720945
chr11	726295	726896
chr11	727751	728407
chr11	737888	738636
chr11	798276	798646
chr11	804995	805735
chr11	809336	810116
chr11	818803	819764
chr11	824359	826108
chr11	826686	828066
chr11	829800	831146
chr11	832369	835220
chr11	841901	842940
chr11	955120	955781
chr11	986579	987004
chr11	1041876	1042455
chr11	1052984	1055084
chr11	1060713	1061450
chr11	1123291	1123996
chr11	1124470	1125130
chr11	1142679	1143091
chr11	1144745	1146450
chr11	1240879	1241827
chr11	1243806	1244645
chr11	1244955	1246018
chr11	1254532	1255466
chr11	1258223	1259023
chr11	1320384	1320720
chr11	1410459	1410897
chr11	1455156	1455544
chr11	1468995	1469445
chr11	1507152	1507714
chr11	1567283	1568880
chr11	1575243	1575814
chr11	1580175	1580895
chr11	1594759	1595838
chr11	1660276	1660603
chr11	1712228	1712978
chr11	1783579	1784463
chr11	1793532	1794230
chr11	1799401	1800337
chr11	1848037	1848878
chr11	1851406	1852447
chr11	1854893	1856045
chr11	2013804	2014365
chr11	2187309	2188073
chr11	2214732	2215197
chr11	2223189	2226512
chr11	2232171	2232899
chr11	2277924	2278991
chr11	2290175	2290899
chr11	2291313	2292950
chr11	2421282	2422123
chr11	2484517	2485192
chr11	2548032	2548743
chr11	2554988	2555904
chr11	2610094	2610554
chr11	2799632	2800909
chr11	2809789	2810212
chr11	2846577	2846899
chr11	2913347	2914258
chr11	2932672	2934443
chr11	2949177	2952208
chr11	3078427	3079015
chr11	3112974	3113443
chr11	3540978	3541674
chr11	3592957	3593301
chr11	3861818	3863150
chr11	3876025	3876535
chr11	4115686	4116146
chr11	5617129	5617528
chr11	6255665	6256820
chr11	6341045	6341546
chr11	6411085	6411820
chr11	6624555	6625174
chr11	7596800	7597807
chr11	7618841	7619439
chr11	7625560	7626005
chr11	7633791	7634306
chr11	7686946	7687274
chr11	8703854	8704588
chr11	8710313	8710855
chr11	8742718	8743289
chr11	8985625	8986602
chr11	9385671	9386244
chr11	9482149	9483065
chr11	9567191	9567835
chr11	9590359	9591115
chr11	9594440	9595268
chr11	10004640	10005343
chr11	10041439	10042040
chr11	10328466	10329542
chr11	10510726	10511062
chr11	10772293	10772987
chr11	10879349	10880604
chr11	10920837	10921885
chr11	10996862	10997552
chr11	12013815	12014782
chr11	12112274	12112860
chr11	12131690	12132182
chr11	12165042	12165909
chr11	12188606	12189131
chr11	12251037	12251407
chr11	12254481	12255437
chr11	12269878	12270431
chr11	12279959	12280512
chr11	12744934	12746544
chr11	13030554	13030891
chr11	13036146	13036689
chr11	13165096	13165445
chr11	13189894	13190357
chr11	13298769	13299279
chr11	13354829	13355521
chr11	13484038	13485320
chr11	13685112	13685603
chr11	13689431	13690717
chr11	13986598	13987339
chr11	14147003	14147414
chr11	14737275	14738013
chr11	14908168	14908521
chr11	14912968	14914127
chr11	15671582	15672387
chr11	15676880	15677657
chr11	15686896	15687368
chr11	15691993	15692766
chr11	15716593	15717184
chr11	15988639	15989102
chr11	16023401	16024148
chr11	16301823	16302201
chr11	16759926	16760385
chr11	16910385	16910900
chr11	16940070	16940673
chr11	16981631	16982258
chr11	17007985	17009299
chr11	17035358	17035728
chr11	17036717	17037284
chr11	17099142	17099880
chr11	17230734	17231227
chr11	17297766	17298378
chr11	17373002	17373529
chr11	17501101	17501603
chr11	17565692	17566242
chr11	18034454	18035205
chr11	18343643	18344178
chr11	18404977	18406071
chr11	18548024	18548733
chr11	18600408	18601189
chr11	18609932	18610601
chr11	18980132	18980508
chr11	19034895	19035466
chr11	19049604	19050119
chr11	19093850	19094510
chr11	19138445	19139364
chr11	19242502	19243152
chr11	19262380	19263236
chr11	19265650	19266361
chr11	19298373	19298956
chr11	19734042	19734347
chr11	19775175	19775620
chr11	19825001	19826114
chr11	20385156	20385847
chr11	20408991	20409351
chr11	21696005	21696625
chr11	22174487	22175122
chr11	22306452	22306892
chr11	22646838	22647461
chr11	22851331	22851771
chr11	23811478	23812166
chr11	26134911	26135674
chr11	26642082	26643219
chr11	27209602	27209993
chr11	27223065	27223884
chr11	27231023	27231491
chr11	27409539	27410078
chr11	27410364	27411008
chr11	27419112	27419838
chr11	27423015	27423958
chr11	28129709	28130161
chr11	28364398	28365045
chr11	28370586	28371149
chr11	30193013	30193901
chr11	30542977	30543693
chr11	30762430	30763332
chr11	31071665	31072148
chr11	31705871	31706305
chr11	31968665	31969087
chr11	32604995	32605621
chr11	32851225	32851703
chr11	33278555	33280271
chr11	33651646	33652273
chr11	33712039	33712341
chr11	33722165	33722777
chr11	33755844	33756423
chr11	34095968	34096438
chr11	34195969	34196347
chr11	34264580	34265631
chr11	34270187	34270625
chr11	34459962	34460539
chr11	34621011	34622810
chr11	34624675	34625769
chr11	34661782	34662261
chr11	34675378	34676135
chr11	34676411	34676817
chr11	34771549	34772148
chr11	34847199	34847949
chr11	34871919	34872595
chr11	34876387	34877045
chr11	34937561	34938233
chr11	34951195	34951814
chr11	35026759	35027313
chr11	35030575	35031935
chr11	35843311	35843781
chr11	35949141	35949675
chr11	36474359	36474713
chr11	37518777	37519242
chr11	38111120	38111795
chr11	38832688	38833376
chr11	39511340	39512045
chr11	39563059	39564116
chr11	41803030	41803381
chr11	43333349	43333736
chr11	43701740	43702267
chr11	43902135	43902436
chr11	44087553	44088221
chr11	44586327	44587275
chr11	44622621	44623300
chr11	44855321	44855737
chr11	44970660	44971875
chr11	45000393	45000971
[truncated: 11,543 more rows]

## Sheet: S5B CP-A KLF5 ChIP-seq peaks
chr	start	end
chr1	713950	714208
chr1	901679	902517
chr1	911498	911939
chr1	956280	957535
chr1	960007	960402
chr1	994809	995078
chr1	1005428	1006005
chr1	1009074	1009802
chr1	1014890	1015337
chr1	1051376	1051830
chr1	1092902	1093277
chr1	1093581	1093915
chr1	1172509	1173887
chr1	1240999	1241268
chr1	1260011	1260439
chr1	1268233	1268627
chr1	1279557	1281458
chr1	1310505	1310904
chr1	1334712	1334984
chr1	1356722	1357127
chr1	1358022	1358315
chr1	1368578	1368993
chr1	1397107	1397377
chr1	1406964	1407200
chr1	1447097	1447545
chr1	1617843	1618089
chr1	1623943	1624780
chr1	1672329	1672860
chr1	1690208	1690669
chr1	1850762	1851175
chr1	2066943	2067316
chr1	2071596	2072011
chr1	2144097	2144774
chr1	2166041	2166386
chr1	2343911	2344208
chr1	2347273	2347847
chr1	2383173	2383500
chr1	2425697	2425970
chr1	2431419	2431794
chr1	2464864	2465115
chr1	2466243	2466607
chr1	2478380	2478651
chr1	3376694	3376927
chr1	3585504	3585733
chr1	3597520	3597851
chr1	3633567	3634139
chr1	3712977	3713278
chr1	3817127	3817517
chr1	4710611	4710896
chr1	4897903	4898246
chr1	5448704	5449286
chr1	5611711	5611983
chr1	5671552	5672303
chr1	5712259	5712707
chr1	6259587	6259908
chr1	6265850	6266355
chr1	6280020	6280706
chr1	6354394	6355374
chr1	6360345	6360819
chr1	6413918	6414411
chr1	6418035	6418637
chr1	6445783	6446452
chr1	6453642	6453934
chr1	6472866	6473269
chr1	6474018	6475440
chr1	6480022	6480908
chr1	6487430	6487819
chr1	6548625	6549532
chr1	6551598	6552009
chr1	6614494	6614721
chr1	6639820	6640113
chr1	6661243	6661585
chr1	6845106	6845337
chr1	7461908	7462310
chr1	7586640	7586894
chr1	7831207	7831516
chr1	8021520	8021759
chr1	8064712	8065602
chr1	8136736	8136974
chr1	8215516	8215934
chr1	8227288	8227868
chr1	8242159	8242973
chr1	8254631	8254956
chr1	8257798	8258305
chr1	8264437	8264758
chr1	8272058	8272526
chr1	8299205	8299482
chr1	8937984	8938224
chr1	8938722	8939095
chr1	9138348	9139500
chr1	9242010	9242358
chr1	9294458	9294694
chr1	9360105	9360554
chr1	9473516	9473894
chr1	9704698	9705055
chr1	9826852	9827196
chr1	9885285	9885881
chr1	9938041	9938440
chr1	9941871	9942163
chr1	9951140	9951486
chr1	9953109	9953600
chr1	10003297	10003582
chr1	10270156	10270561
chr1	10570647	10571241
chr1	10659550	10659805
chr1	10695351	10696376
chr1	10704622	10704868
chr1	10816040	10816310
chr1	10839322	10839556
chr1	10856668	10856963
chr1	10864154	10864666
chr1	10878668	10879063
chr1	10958401	10958697
chr1	10959871	10961847
chr1	11072490	11072723
chr1	11159878	11160234
chr1	11333234	11333639
chr1	11741166	11741494
chr1	11865613	11866533
chr1	11969844	11970170
chr1	11999336	11999646
chr1	12040039	12040508
chr1	12079267	12079714
chr1	12497022	12497307
chr1	12538137	12538687
chr1	12609850	12610198
chr1	12655807	12656161
chr1	12664395	12664693
chr1	12678168	12678615
chr1	12678945	12679469
chr1	13955214	13955485
chr1	13977877	13978112
chr1	14655190	14655434
chr1	15390703	15390937
chr1	15415846	15416092
chr1	15678793	15679072
chr1	15682775	15683174
chr1	15742501	15742763
chr1	15743442	15744377
chr1	15750679	15751169
chr1	16107089	16107380
chr1	16114620	16114995
chr1	16121711	16121987
chr1	16125452	16126062
chr1	16126398	16127288
chr1	16161356	16161631
chr1	16249789	16250063
chr1	16275910	16276277
chr1	16279270	16279557
chr1	16382605	16382851
chr1	16466085	16466385
chr1	16469896	16470845
chr1	16471340	16472459
chr1	16472688	16473109
chr1	16481382	16481800
chr1	16482546	16482786
chr1	16485477	16485864
chr1	16488829	16489127
chr1	16498839	16499102
chr1	16499528	16500470
chr1	16505608	16505910
chr1	16508377	16508755
chr1	16511160	16511671
chr1	16515529	16515951
chr1	16693501	16693741
chr1	16940014	16940473
chr1	16950539	16950832
chr1	17252134	17252384
chr1	17275021	17275268
chr1	17454984	17455245
chr1	17516367	17516975
chr1	17539303	17539532
chr1	17541409	17542301
chr1	17552837	17553232
chr1	17560222	17560534
chr1	17624486	17624758
chr1	17630846	17631386
chr1	17674492	17675123
chr1	17767977	17768447
chr1	17786799	17787095
chr1	17814375	17814730
chr1	17846625	17847042
chr1	17896296	17896598
chr1	18995205	18995535
chr1	19252873	19253402
chr1	19336365	19336726
chr1	19337638	19337924
chr1	19355893	19356234
chr1	19360427	19360741
chr1	19399881	19400128
chr1	19401201	19401678
chr1	19794899	19795242
chr1	19966409	19966918
chr1	20230124	20230372
chr1	20251943	20252303
chr1	20364334	20364844
chr1	20538075	20538410
chr1	20558967	20559478
chr1	20682363	20682661
chr1	20802808	20803285
chr1	20807898	20808324
chr1	20821426	20821779
chr1	20822531	20823098
chr1	20915251	20915612
chr1	20938917	20939362
chr1	21113027	21113270
chr1	21621065	21621650
chr1	21650897	21651455
chr1	21953344	21953867
chr1	22114757	22115086
chr1	22256707	22257086
chr1	22257529	22257946
chr1	22283208	22283593
chr1	22301224	22301536
chr1	22312494	22312762
chr1	22378989	22379373
chr1	23072676	23073065
chr1	23158547	23158779
chr1	23330485	23330734
chr1	23337207	23337646
chr1	23428771	23429015
chr1	23515482	23515788
chr1	23523357	23523833
chr1	23703893	23704287
chr1	23782740	23783099
chr1	23851438	23851893
chr1	23854703	23855070
chr1	23884733	23885120
chr1	23919685	23920319
chr1	24117429	24117735
chr1	24126082	24126439
chr1	24127201	24127507
chr1	24151849	24152100
chr1	24191942	24192359
chr1	24194505	24194808
chr1	24307202	24307545
chr1	24476311	24476602
chr1	24501935	24502167
chr1	24518392	24518782
chr1	24529861	24530253
chr1	24592906	24593331
chr1	24609839	24610104
chr1	24621376	24621682
chr1	24643612	24643861
chr1	24645686	24646251
chr1	24648688	24649021
chr1	24691738	24691992
chr1	24701251	24701627
chr1	24739893	24740218
chr1	24745525	24745983
chr1	25010109	25010488
chr1	25071603	25072029
chr1	25349363	25349727
chr1	25357432	25357676
chr1	25493767	25494292
chr1	25573861	25574245
chr1	25664679	25665261
chr1	25678781	25679047
chr1	25833265	25833595
chr1	25876088	25876434
chr1	25894872	25895726
chr1	26216930	26217395
chr1	26218715	26219334
chr1	26221906	26222162
chr1	26324592	26325080
chr1	26453023	26453322
chr1	26602804	26603047
chr1	26606174	26606778
chr1	26611293	26611543
chr1	26663004	26663361
chr1	26678132	26678695
chr1	26680477	26681043
chr1	26683721	26684033
chr1	26685332	26685606
chr1	26704589	26705150
chr1	26758508	26759075
chr1	26826776	26827746
chr1	26857694	26857968
chr1	26946755	26948163
chr1	27019452	27019968
chr1	27021929	27022236
chr1	27060478	27060777
chr1	27138720	27139030
chr1	27175888	27176147
chr1	27179685	27179971
chr1	27181435	27181790
chr1	27187856	27188165
chr1	27188492	27188801
chr1	27189195	27189728
chr1	27191521	27191962
chr1	27198896	27199203
chr1	27325435	27326362
chr1	27334705	27334941
chr1	27337454	27337955
chr1	27339330	27339837
chr1	27357814	27358350
chr1	27426186	27426591
chr1	27438646	27438981
chr1	27481570	27481931
chr1	27518545	27519558
chr1	27648418	27648907
chr1	27668293	27668752
chr1	27669416	27670112
chr1	27673699	27674026
chr1	27692227	27692699
chr1	27693253	27693604
chr1	27763114	27763375
chr1	27816455	27817263
chr1	27848852	27849154
chr1	27866914	27867175
chr1	27869378	27869614
chr1	27884202	27884793
chr1	28013242	28013520
chr1	28295192	28295651
chr1	28462012	28462497
chr1	28523539	28524035
chr1	28678022	28678285
chr1	28696141	28696444
chr1	28840695	28841006
chr1	28841887	28842802
chr1	28879316	28879812
chr1	28908082	28908637
chr1	28974680	28975228
chr1	29063217	29063498
chr1	29211470	29211789
chr1	29450924	29451235
chr1	29508461	29508860
chr1	29557353	29557650
chr1	29565499	29566144
chr1	29575720	29576127
chr1	29598224	29598666
chr1	29876646	29876924
chr1	30042935	30043395
chr1	30182316	30182960
chr1	31122301	31122716
chr1	31130478	31130775
chr1	31229517	31229924
chr1	31628112	31628500
chr1	31862952	31863302
chr1	31869738	31871146
chr1	31895363	31895888
chr1	31899101	31899515
chr1	31956252	31956531
chr1	32028512	32028896
chr1	32039431	32039823
chr1	32040553	32042304
chr1	32054243	32054504
chr1	32054784	32055189
chr1	32110208	32110923
chr1	32132076	32132368
chr1	32155452	32155776
chr1	32400394	32400652
chr1	32404056	32404425
chr1	32409890	32410385
chr1	32421631	32421873
chr1	32479041	32479579
chr1	32599124	32599462
chr1	32706033	32706309
chr1	33116135	33116776
chr1	33168488	33169035
chr1	33182154	33182557
chr1	33190836	33191098
chr1	33195565	33195829
chr1	33224981	33226163
chr1	33226456	33226700
chr1	33282944	33283881
chr1	33430382	33430634
chr1	33457980	33458748
chr1	33685484	33685748
chr1	33686314	33687134
chr1	33899450	33899712
chr1	34100429	34100687
chr1	35220711	35221388
chr1	35225187	35225455
chr1	35228294	35229559
chr1	35245255	35245513
chr1	35246143	35247031
chr1	35249143	35249585
chr1	35325244	35325541
chr1	35497319	35497592
chr1	36023183	36023418
chr1	36554350	36554990
chr1	36616435	36616681
chr1	36627763	36628052
chr1	36689616	36690559
chr1	36772567	36772866
chr1	36816468	36816731
chr1	36839353	36839640
chr1	36851594	36852374
chr1	36902501	36902730
chr1	37917474	37917740
chr1	37942163	37942408
chr1	37945219	37945683
chr1	38019731	38020191
chr1	38325143	38325480
chr1	38591837	38592128
chr1	38604299	38604687
chr1	38686666	38686980
chr1	39598677	39598992
chr1	39624828	39625176
chr1	39649292	39649705
chr1	39864204	39864682
chr1	40421711	40422075
chr1	40436079	40436382
chr1	40446067	40446454
chr1	40505477	40506646
chr1	40562844	40563143
chr1	40573302	40573564
chr1	40707651	40708012
chr1	40723444	40723977
chr1	41329657	41330080
chr1	41355411	41355761
chr1	41363252	41363549
chr1	41365205	41365560
chr1	41472646	41473328
chr1	41575079	41575930
chr1	41884662	41884971
chr1	41961927	41962394
chr1	41964475	41964858
chr1	42361309	42361572
chr1	42366357	42366682
chr1	42367838	42368247
chr1	42631198	42631933
chr1	42688023	42688438
chr1	43389820	43390262
chr1	43397617	43398177
chr1	43401986	43402570
chr1	43402800	43403237
chr1	43406539	43407147
chr1	43407478	43407777
chr1	43408865	43409300
chr1	43424496	43425183
chr1	43432748	43433039
chr1	43474148	43474528
chr1	43672370	43672881
chr1	43736123	43736441
chr1	43824139	43824756
chr1	43831950	43832503
chr1	43833470	43834070
chr1	43838737	43839099
chr1	43888842	43889928
chr1	43938155	43938612
chr1	43941696	43941973
chr1	44002225	44002989
chr1	44015576	44016429
chr1	44047906	44048244
chr1	44249304	44249772
chr1	44299999	44300425
chr1	44399245	44399542
chr1	44412267	44412543
chr1	44494163	44494451
chr1	44495624	44496347
chr1	44793644	44793953
chr1	44997707	44998124
chr1	45003336	45003835
chr1	45018508	45018755
chr1	45023492	45023764
chr1	45140069	45140417
chr1	45187147	45187450
chr1	45240969	45241336
chr1	45265444	45265826
chr1	45273037	45273776
chr1	45279438	45279826
chr1	45769089	45769906
chr1	45987372	45987855
chr1	46598225	46598662
chr1	46648968	46649343
chr1	46859794	46860358
chr1	46867793	46868168
chr1	46982749	46983083
chr1	46988091	46988362
chr1	46996524	46996758
chr1	47022509	47022849
chr1	47077456	47077823
chr1	47184764	47185196
chr1	47323381	47323704
chr1	47573488	47574033
chr1	47903309	47903583
chr1	47943867	47944095
chr1	48483320	48483722
chr1	48535754	48536124
chr1	49159524	49159909
chr1	51069122	51069656
chr1	51086401	51087012
chr1	51537794	51538137
chr1	51727143	51727497
chr1	51733564	51733997
chr1	51762512	51762775
chr1	52023986	52024479
chr1	52102799	52103057
chr1	52195195	52195501
chr1	52344426	52344696
chr1	52363201	52363557
chr1	52642295	52642636
chr1	52831691	52832068
chr1	53513665	53514034
chr1	53685876	53686415
chr1	53791652	53792292
chr1	54422834	54423319
chr1	54481714	54482426
chr1	54518718	54519196
chr1	54875198	54875461
chr1	55007944	55008658
chr1	55029956	55030307
chr1	55181198	55181618
chr1	55894590	55895358
chr1	56046582	56046857
chr1	56097967	56098257
chr1	56104756	56105099
chr1	56184614	56184907
chr1	56192696	56193001
chr1	58507250	58507782
chr1	59038347	59038795
chr1	59042815	59043292
chr1	59049694	59050497
chr1	59086017	59086398
chr1	59249697	59250414
chr1	59280337	59280576
chr1	59280903	59281239
chr1	59281571	59282280
chr1	59290781	59291088
chr1	59314505	59314875
chr1	59347090	59347527
chr1	59395461	59395821
chr1	59398428	59398970
chr1	59573269	59573559
chr1	59605052	59605437
chr1	59608785	59609065
chr1	59795160	59795453
chr1	59900087	59900415
chr1	59910711	59911039
chr1	60139519	60139887
chr1	60357901	60358202
chr1	61803695	61804564
chr1	61916187	61916527
chr1	62190644	62191045
chr1	62207876	62208181
chr1	62675992	62676254
chr1	62696383	62696779
chr1	62901886	62902683
chr1	63249369	63249761
chr1	63988913	63989150
chr1	64059726	64060306
chr1	64127775	64129252
chr1	64197308	64197604
chr1	64386258	64386624
chr1	64507480	64507717
chr1	64598718	64599045
chr1	64728971	64729246
chr1	64808874	64809591
chr1	66736927	66737253
chr1	66760333	66760838
chr1	67390590	67391105
chr1	68152278	68152726
chr1	68201815	68202214
chr1	68215234	68216001
chr1	68219810	68220244
chr1	68281370	68281797
chr1	68297863	68298143
chr1	68387487	68387729
chr1	68850564	68850924
chr1	68851592	68852137
chr1	70671186	70671428
chr1	70876682	70876913
chr1	72466420	72466786
chr1	75198571	75198816
chr1	75841573	75842119
chr1	76320680	76321210
chr1	77464346	77464672
chr1	77684961	77685244
chr1	78005470	78005741
chr1	78444913	78445204
chr1	78703231	78703644
chr1	80841270	80841590
chr1	80858131	80858617
chr1	81640522	81640936
chr1	83521030	83521332
chr1	84971691	84972441
chr1	85156352	85156590
chr1	85354438	85354789
chr1	85742187	85742716
chr1	85755124	85755566
chr1	85763593	85764269
chr1	85794727	85794969
chr1	85961333	85961566
chr1	86021827	86022259
chr1	86037516	86037833
chr1	86046093	86046413
chr1	86072696	86073312
chr1	86174034	86174863
chr1	87253970	87254503
chr1	87796888	87797285
chr1	88393398	88393655
chr1	89150443	89150858
chr1	89239687	89240277
chr1	89458503	89458895
chr1	90331605	90331957
chr1	90355691	90356041
chr1	90418845	90419088
chr1	91045826	91046055
chr1	92075220	92075585
chr1	92077009	92077472
chr1	92079171	92079572
chr1	92270215	92270652
chr1	92792148	92792519
chr1	92794878	92795261
chr1	92912070	92912370
chr1	93374823	93375079
chr1	93544638	93544886
chr1	93645892	93646384
chr1	93790501	93790806
chr1	93811238	93811509
chr1	93907892	93908244
chr1	94050675	94050957
chr1	94089499	94089767
chr1	94158524	94159123
chr1	94159665	94159988
chr1	94167129	94168450
chr1	94203723	94204320
chr1	94245001	94245892
chr1	94278726	94279096
chr1	94293962	94294249
chr1	94454564	94454824
chr1	94511152	94511492
chr1	94724558	94724822
chr1	94736404	94736638
chr1	94791346	94791731
chr1	95045466	95045819
chr1	95086953	95087329
chr1	95088262	95088732
chr1	95089101	95089604
chr1	95102224	95102466
chr1	95107539	95107901
chr1	95111680	95112279
chr1	95113777	95114007
chr1	95123013	95123627
chr1	95179240	95179589
chr1	95205206	95205466
chr1	95319986	95320278
chr1	95328306	95328605
chr1	96208081	96208609
chr1	97187495	97187886
chr1	98788677	98789951
chr1	99127463	99127848
chr1	100045984	100046418
chr1	100503441	100503779
chr1	101491345	101491591
chr1	108073710	108073965
chr1	108559099	108559384
chr1	108742480	108742754
chr1	109289133	109289432
chr1	109419350	109419656
chr1	109505926	109506227
chr1	109740686	109740971
chr1	109756455	109756684
chr1	109805840	109806527
chr1	109817172	109817942
chr1	110021538	110021779
chr1	110091089	110091773
chr1	110881139	110881366
chr1	110950144	110950507
chr1	111019717	111020371
chr1	112135410	112135919
chr1	112281512	112281766
chr1	112298073	112298603
chr1	112794354	112795029
chr1	112862285	112862555
chr1	112933448	112933949
chr1	113216934	113217340
chr1	113229948	113230452
chr1	113242998	113243697
chr1	113247463	113248278
chr1	113446705	113447061
chr1	113447563	113447917
chr1	113734234	113734510
chr1	113851057	113851376
chr1	113933017	113933338
chr1	114354871	114355343
chr1	114447342	114448013
chr1	114471991	114472286
chr1	115153336	115153816
chr1	115212772	115213358
chr1	115258992	115259677
chr1	115533428	115533695
chr1	115605208	115605697
chr1	115675796	115676032
chr1	115711358	115711671
chr1	115721968	115722476
chr1	115765125	115765515
chr1	115843164	115843469
chr1	115954320	115954641
chr1	115974774	115975064
chr1	116088392	116088901
chr1	116257067	116257742
chr1	116314350	116314771
chr1	116325414	116326031
chr1	116520208	116520442
chr1	116915148	116915561
chr1	116919050	116919320
chr1	117051492	117051893
chr1	117080152	117080382
chr1	117112404	117112661
chr1	117164509	117164759
chr1	117236524	117236929
chr1	118148400	118148658
chr1	119683208	119683568
chr1	119901325	119901606
chr1	120216840	120217100
chr1	120330407	120330726
chr1	121143564	121143887
chr1	143913312	143913558
chr1	144010672	144010947
chr1	144932364	144932804
chr1	145009283	145009862
chr1	145092460	145092794
chr1	145163734	145163966
chr1	145208918	145209166
chr1	145216978	145217248
chr1	145382723	145383044
chr1	145437524	145437849
chr1	145455278	145455756
chr1	145456040	145456373
chr1	145516140	145516396
chr1	145542622	145543092
chr1	145543621	145543875
chr1	145575848	145576140
chr1	145728344	145728737
chr1	146643706	146644261
chr1	147016842	147017187
chr1	147142625	147142883
chr1	147806742	147807023
chr1	148241033	148241273
chr1	148241515	148241855
chr1	149223782	149224135
chr1	149858066	149858512
chr1	149911175	149911578
chr1	149982409	149983011
chr1	150241271	150241748
chr1	150254073	150254872
chr1	150449962	150450523
chr1	150524616	150525102
chr1	150533725	150534102
chr1	150534486	150534773
chr1	150583956	150584358
chr1	150596709	150596994
chr1	150849023	150849490
chr1	150949838	150950084
chr1	151031200	151031479
chr1	151031943	151032203
chr1	151043028	151043331
chr1	151162389	151162842
chr1	151167540	151168300
chr1	151253819	151254130
chr1	151254887	151255299
chr1	151467385	151467754
chr1	151485348	151486600
chr1	151512610	151512858
chr1	151519598	151520279
chr1	151521347	151521600
chr1	151547462	151547735
chr1	151882071	151882389
chr1	151918145	151919149
chr1	151960795	151962531
chr1	151964744	151967094
chr1	151973903	151974502
chr1	151996434	151997210
chr1	152001648	152001920
chr1	152007065	152007334
chr1	152009015	152009804
chr1	152020141	152021319
chr1	152135373	152135643
chr1	152137285	152137714
chr1	152140219	152140741
chr1	152163721	152164100
chr1	152365401	152365845
chr1	152409068	152409615
chr1	152489667	152490085
chr1	152539254	152539516
chr1	152724746	152725051
chr1	152878566	152879024
chr1	152885431	152885705
chr1	152913969	152914211
chr1	152926145	152926606
chr1	152939616	152939955
chr1	153003403	153003673
chr1	153018963	153019301
chr1	153031757	153032061
chr1	153071910	153072200
chr1	153072755	153073184
chr1	153095357	153095899
chr1	153160764	153161063
chr1	153330098	153330339
chr1	153488336	153488732
chr1	153498655	153498915
chr1	153506277	153506661
chr1	153507881	153508767
chr1	153509204	153509473
chr1	153513372	153513645
chr1	153517430	153517875
chr1	153521827	153522087
chr1	153537964	153538585
chr1	153538886	153539468
chr1	153539701	153540677
chr1	153580744	153582006
chr1	153582857	153583612
chr1	153585435	153585989
chr1	153588731	153589134
chr1	153589575	153590537
chr1	153605979	153606520
chr1	153755973	153756337
chr1	153895501	153895784
chr1	153931031	153931392
chr1	153935359	153936832
chr1	153974133	153974474
chr1	154154760	154155952
chr1	154244730	154245088
chr1	154390541	154391171
chr1	154404126	154404511
chr1	154405688	154406173
chr1	154457054	154457301
chr1	154531238	154531558
chr1	154909000	154909764
chr1	154945012	154945682
chr1	154946115	154946443
chr1	154947019	154947586
chr1	154973234	154974268
chr1	154974549	154974867
chr1	154976424	154976756
chr1	154978089	154978396
chr1	154989595	154990214
chr1	155022942	155023683
chr1	155055516	155055943
chr1	155057233	155058321
chr1	155057233	155058321
chr1	155099789	155100027
chr1	155102005	155102615
chr1	155107508	155107858
chr1	155162789	155164129
chr1	155178474	155179107
chr1	155214325	155214769
chr1	155225205	155225554
chr1	155232132	155232526
chr1	155278411	155278874
chr1	155279280	155279720
chr1	155290539	155290896
chr1	155293643	155294416
chr1	155294868	155295168
chr1	155532708	155533061
chr1	155579252	155580041
chr1	155621230	155621491
chr1	155881025	155881330
chr1	155901165	155901569
chr1	155931520	155932197
chr1	155932499	155932771
chr1	155948276	155949022
chr1	155973265	155973560
chr1	156024339	156024740
chr1	156083842	156084621
chr1	156085692	156086071
chr1	156092713	156093949
chr1	156094898	156095431
chr1	156095900	156097466
chr1	156099859	156100377
chr1	156232393	156232703
chr1	156252630	156252873
chr1	156368236	156368491
chr1	156432073	156432336
chr1	156433669	156434076
chr1	156470708	156471474
chr1	156473141	156473408
chr1	156474726	156475410
chr1	156542163	156542517
chr1	156556777	156557105
chr1	156631236	156631480
chr1	156710594	156711309
chr1	156716562	156717005
chr1	156718129	156718468
chr1	156720011	156720342
chr1	156862157	156862443
chr1	156866308	156866775
chr1	156868007	156868262
chr1	157108184	157108434
chr1	157991444	157991854
chr1	158116042	158116289
chr1	158116577	158116858
chr1	159024588	159025146
chr1	159061139	159062198
chr1	159750544	159751041
chr1	159824574	159824973
chr1	159886125	159886758
chr1	159892833	159893464
chr1	159894152	159895449
chr1	159915312	159916145
chr1	159929305	159929614
chr1	159930416	159931143
chr1	160001744	160002030
chr1	160094631	160094907
chr1	160175847	160176132
chr1	160377612	160378408
chr1	160490469	160490744
chr1	160751272	160751565
chr1	160796371	160796641
chr1	160965138	160965420
chr1	160983571	160983851
chr1	160990340	160991244
chr1	160992231	160992577
chr1	161044385	161045040
chr1	161052993	161053758
chr1	161062351	161062750
chr1	161087735	161088208
chr1	161102441	161102888
chr1	161136098	161136426
chr1	161152113	161152381
chr1	161195576	161195907
chr1	161283982	161284271
chr1	161509866	161510253
chr1	161699898	161700245
chr1	161703415	161703645
chr1	161706322	161706736
chr1	162351201	162351754
chr1	162863018	162863403
chr1	162869717	162870018
chr1	163005479	163005851
chr1	163291491	163292047
chr1	163370978	163371230
chr1	164571271	164571522
chr1	164582465	164582728
chr1	164620907	164621203
chr1	164629484	164629719
chr1	164652572	164652878
chr1	164704956	164705234
chr1	165333978	165334251
chr1	165362231	165362548
chr1	165451458	165451839
chr1	165599852	165600566
chr1	165601168	165601602
chr1	165615157	165615649
chr1	165742710	165742995
chr1	165820236	165820618
chr1	165868133	165868448
chr1	166136303	166136580
chr1	166141447	166141687
chr1	166572629	166572914
chr1	167078453	167078926
chr1	167130572	167130823
chr1	167138969	167139225
chr1	167274993	167275405
chr1	167411367	167411615
chr1	167632245	167632819
chr1	167683495	167684049
chr1	167759458	167759766
chr1	167905902	167906329
chr1	168085749	168086041
chr1	168105219	168105727
chr1	168270928	168271471
chr1	168445870	168446249
chr1	168598174	168598536
chr1	168605934	168606252
chr1	168612405	168612706
chr1	169074775	169075186
chr1	169336967	169337579
chr1	169429276	169429769
chr1	169498559	169498822
chr1	169645213	169645517
chr1	169750552	169750967
chr1	169764067	169764394
chr1	169863011	169863435
chr1	170032384	170032907
chr1	170865219	170865592
chr1	171342895	171343251
chr1	171366138	171366450
chr1	171750342	171750707
chr1	172321244	172321902
chr1	172329690	172329970
chr1	172400830	172401260
chr1	172418086	172418509
chr1	172445368	172445670
chr1	172715495	172715830
chr1	172864946	172865191
chr1	172887118	172887453
chr1	172955831	172956486
chr1	173374957	173375324
chr1	173393933	173394168
chr1	173399055	173399344
chr1	173793377	173794083
chr1	173837108	173838059
chr1	173991410	173991865
chr1	174121588	174122001
chr1	174129282	174129538
chr1	174207853	174208437
chr1	174788200	174788472
chr1	174817726	174818436
chr1	174992508	174992825
chr1	175005124	175005362
chr1	175162028	175162329
chr1	175166694	175166983
chr1	175191163	175191663
chr1	175238334	175238639
chr1	176826911	176827156
chr1	177188776	177189684
chr1	177225544	177225805
chr1	178095535	178096359
chr1	178207802	178208537
chr1	178247328	178247753
chr1	178289342	178289941
chr1	178387073	178387436
chr1	178499179	178499451
chr1	178505972	178506969
chr1	178507743	178508114
chr1	178579999	178580361
chr1	178624914	178625247
chr1	178986198	178986635
chr1	179111067	179111333
chr1	179112176	179112702
chr1	179262801	179263032
chr1	179263698	179263972
chr1	179334892	179335194
chr1	179701590	179701818
chr1	179851560	179851984
chr1	180179166	180179431
chr1	180471843	180472076
chr1	181057659	181058004
chr1	181069686	181069983
chr1	181074050	181074457
chr1	181081581	181082448
chr1	181086657	181087118
chr1	181088464	181088873
chr1	181103869	181104430
chr1	181108714	181109345
chr1	181128583	181129362
chr1	181220385	181220646
chr1	181294231	181294764
chr1	181616641	181617196
chr1	181998549	181999360
chr1	182057186	182057544
chr1	182070556	182070904
chr1	182076384	182076636
chr1	182113275	182113655
chr1	182144522	182144794
chr1	182187077	182187586
chr1	182205429	182205747
chr1	183063179	183063423
chr1	183129052	183129705
chr1	183132444	183132962
chr1	183133461	183134494
chr1	183149915	183150274
chr1	183154930	183155452
chr1	183203673	183204017
chr1	183237220	183237561
chr1	183241403	183241844
chr1	183248215	183249367
chr1	183430617	183430951
chr1	183440359	183441444
chr1	183582292	183582621
chr1	183604281	183604860
chr1	183627303	183627826
chr1	184836191	184836504
chr1	184970847	184971165
chr1	185126113	185126686
chr1	185381857	185382359
chr1	185534515	185534779
chr1	186152366	186152777
chr1	186157543	186157801
chr1	186344501	186344860
chr1	186461702	186461965
chr1	186896990	186897327
chr1	187996864	187997229
chr1	188675927	188676335
chr1	189627410	189627963
chr1	192469680	192470328
chr1	192796257	192796514
chr1	192876791	192877136
chr1	193028430	193028922
chr1	193090850	193091333
chr1	193180541	193181074
chr1	193291309	193291700
chr1	195066447	195066801
chr1	197676877	197677148
chr1	197987698	197988184
chr1	198412497	198412987
chr1	198418406	198419432
chr1	198638232	198638601
chr1	198745808	198746076
chr1	199728414	199728937
chr1	200119910	200120184
chr1	200343750	200343978
chr1	200452626	200452890
chr1	200589633	200590217
chr1	200628443	200628744
chr1	200638441	200639642
chr1	200862520	200863090
chr1	200863896	200864209
chr1	200865809	200866218
chr1	200874919	200875261
chr1	201123542	201123802
chr1	201228701	201229774
chr1	201235880	201236155
chr1	201237059	201237364
chr1	201244396	201244821
chr1	201265011	201265380
chr1	201269106	201269346
chr1	201276656	201277401
chr1	201278581	201278930
chr1	201279816	201280776
chr1	201322324	201322719
chr1	201366007	201366523
chr1	201368500	201368832
chr1	201376348	201376603
chr1	201404564	201405071
chr1	201426167	201426458
chr1	201430301	201430628
chr1	201430933	201431522
chr1	201438118	201438443
chr1	201449618	201450181
chr1	201458340	201458928
chr1	201475650	201475910
chr1	201476251	201476535
chr1	201482156	201482436
chr1	201485019	201485314
chr1	201486856	201487177
chr1	201682598	201683079
chr1	201683703	201684108
chr1	201975830	201976178
chr1	201977141	201977599
chr1	201979436	201979770
chr1	201986801	201988563
chr1	201992017	201992611
chr1	201998012	201998745
chr1	202003744	202004383
chr1	202015386	202015730
chr1	202016001	202016400
chr1	202025676	202026816
chr1	202027255	202027875
chr1	202046091	202046331
chr1	202054522	202054785
chr1	202075402	202075869
chr1	202077446	202077819
chr1	202168487	202168758
chr1	202204994	202205532
chr1	202252787	202253281
chr1	202317512	202317901
chr1	202425745	202426016
chr1	202558402	202558697
chr1	202563026	202563300
chr1	202777301	202777854
chr1	202779787	202780083
chr1	202857920	202858160
chr1	202895973	202896449
chr1	203275605	203276066
chr1	203481861	203482267
chr1	203483332	203483561
chr1	203503747	203504037
chr1	203506030	203506391
chr1	203527382	203527862
chr1	203595639	203595978
chr1	203597845	203598163
chr1	203619496	203619788
chr1	203630758	203631163
chr1	203632259	203632904
chr1	203643290	203643696
chr1	203661742	203662636
chr1	203764563	203764801
chr1	203830588	203830820
chr1	204047475	204047775
chr1	204048982	204049896
chr1	204071889	204072307
chr1	204073315	204074062
chr1	204140879	204141181
chr1	204183191	204183464
chr1	204257369	204257664
chr1	204288531	204289049
chr1	204380728	204381057
chr1	204412408	204412747
chr1	204417605	204418025
chr1	204419778	204420106
chr1	204448835	204449362
chr1	204462493	204463724
chr1	204463959	204464189
chr1	204485470	204485899
chr1	204885000	204885382
chr1	205180327	205180899
chr1	205253484	205254236
chr1	205255719	205255977
chr1	205410130	205410631
chr1	205718405	205718867
chr1	205859852	205860122
chr1	206138018	206138335
chr1	206319808	206320091
chr1	206642761	206643567
chr1	206656004	206656273
chr1	206672002	206672268
chr1	206686606	206687453
chr1	206698319	206698708
chr1	206785731	206786025
chr1	206808672	206809228
chr1	207082700	207083044
chr1	207176018	207176463
chr1	207180408	207181238
chr1	207193356	207194412
chr1	207194967	207195440
chr1	207197701	207198134
chr1	207198491	207198725
chr1	207200487	207201008
chr1	207205973	207206296
chr1	207226021	207226549
chr1	207406054	207406451
chr1	207414014	207414437
chr1	207489975	207490267
chr1	207494299	207495145
chr1	207567005	207567317
chr1	207903849	207904438
chr1	207979209	207979553
chr1	208021623	208021909
chr1	208041625	208041921
chr1	208137651	208137909
chr1	208305642	208306093
chr1	208352767	208353167
chr1	208357528	208358219
chr1	208374447	208374937
chr1	208376689	208376930
chr1	208380761	208381400
chr1	208392669	208393375
chr1	209171301	209171564
chr1	209537885	209538415
chr1	209557294	209557638
chr1	209562463	209562969
chr1	209571924	209572236
chr1	209578449	209578719
chr1	209583177	209583531
chr1	209584929	209585844
chr1	209589320	209589825
chr1	209606704	209607386
chr1	209704391	209704636
chr1	209824610	209824948
chr1	209825515	209826756
chr1	209828926	209829591
chr1	209830452	209830840
chr1	209957835	209958163
chr1	209979346	209979837
chr1	209981450	209981759
chr1	209989186	209990251
chr1	209999154	209999700
chr1	210046661	210047161
chr1	210069084	210069427
chr1	210074201	210074497
chr1	210406642	210407641
chr1	210424534	210424789
chr1	211371473	211371949
chr1	211432223	211432690
chr1	211688458	211688913
chr1	211690490	211690798
chr1	211752410	211752780
chr1	211806148	211806389
chr1	212098317	212098736
chr1	212101498	212101951
chr1	212102269	212102722
chr1	212208361	212209074
chr1	212458161	212458842
chr1	212588001	212588256
chr1	212605996	212606226
chr1	212732155	212732488
chr1	212769264	212769866
chr1	212780071	212780455
chr1	212781659	212782135
chr1	212965017	212965353
chr1	213616813	213617105
chr1	214276378	214276623
chr1	214601249	214601652
chr1	214612775	214613233
chr1	214620341	214620582
chr1	214640587	214640906
chr1	214648855	214649583
chr1	214650324	214650705
chr1	214725503	214725953
chr1	214747369	214747658
chr1	215074990	215075403
chr1	215156546	215156785
chr1	215649072	215649793
chr1	215756836	215757077
chr1	217076075	217077105
chr1	217552691	217553048
chr1	217833730	217834129
chr1	218458451	218458805
chr1	218550721	218551018
chr1	218670018	218670279
chr1	218773311	218773585
chr1	218878918	218880068
chr1	219498492	219498733
chr1	220267271	220267966
chr1	221508621	221509095
chr1	221613228	221613732
chr1	222013163	222013620
chr1	222060488	222060818
chr1	222065071	222065417
chr1	222121129	222121460
chr1	222131515	222131883
chr1	222142708	222143028
chr1	222144499	222144810
chr1	222164605	222164871
chr1	222461346	222461855
chr1	222817443	222817692
chr1	222884586	222885103
chr1	222885903	222886243
chr1	222886550	222887065
chr1	223254611	223254987
chr1	223283101	223283390
chr1	223363474	223364026
chr1	223406976	223407233
chr1	223529079	223529550
chr1	223842633	223843114
chr1	223853336	223853813
chr1	223888567	223889265
chr1	223894895	223895238
chr1	223895515	223895860
chr1	223903067	223903358
chr1	223914290	223914566
chr1	223959749	223960145
chr1	223981947	223982185
chr1	224245601	224246241
chr1	224267380	224268088
chr1	224371394	224371650
chr1	224401353	224401889
chr1	224544403	224544632
chr1	224544976	224545238
chr1	224685849	224686522
chr1	224691097	224691809
chr1	224730611	224730914
chr1	224825227	224825504
chr1	225632669	225632925
chr1	225633873	225634156
chr1	225636943	225637455
chr1	225651074	225651803
chr1	225943046	225943359
chr1	225965310	225965809
chr1	226069355	226070069
chr1	226186974	226187425
chr1	226311184	226311656
chr1	226374466	226374832
chr1	226823107	226823371
chr1	227002841	227003209
chr1	227245966	227246425
chr1	227505925	227506237
chr1	227510859	227511194
chr1	227521221	227521554
chr1	227544685	227545398
chr1	227584036	227584900
chr1	227589596	227589861
chr1	227953954	227954195
chr1	227975535	227975903
chr1	227993401	227993818
chr1	228073203	228073710
chr1	228103412	228103802
chr1	228133917	228134380
chr1	228233633	228233866
chr1	228247449	228247773
chr1	228296968	228297273
chr1	228327685	228328075
chr1	228328340	228328631
chr1	228350180	228351089
chr1	228353297	228353853
chr1	228528719	228529031
chr1	228555530	228555876
chr1	228646969	228647199
chr1	228674336	228674756
chr1	228731510	228731988
chr1	228782353	228782810
chr1	228783367	228783942
chr1	228974209	228974603
chr1	229361249	229361536
chr1	229364910	229365181
chr1	229643987	229644246
chr1	229694503	229695028
chr1	230220064	230221195
chr1	230226110	230226381
chr1	230240460	230240989
chr1	230258096	230258635
chr1	230677870	230678160
chr1	231114537	231114941
chr1	231967938	231968283
chr1	232266502	232266843
chr1	232665606	232665946
chr1	232674442	232674689
chr1	233248639	233248961
chr1	233428036	233428266
chr1	233462863	233463167
chr1	233656288	233656564
chr1	233790400	233790977
chr1	233804578	233804878
chr1	233824731	233825018
chr1	234725117	234725497
chr1	234735550	234735810
chr1	234748291	234748676
chr1	234754209	234754451
chr1	234767353	234768027
chr1	234792714	234793422
chr1	234793916	234794268
chr1	234859009	234860142
chr1	234882566	234882795
chr1	234908134	234908593
chr1	235001987	235002549
chr1	235110815	235111182
chr1	235116425	235117051
chr1	235132824	235133339
chr1	235134095	235134559
chr1	235147282	235148022
chr1	235242719	235243178
chr1	235491512	235492145
chr1	235530638	235531012
chr1	235667737	235668219
chr1	235695623	235696099
chr1	236073702	236074220
chr1	236080819	236081178
chr1	236083233	236083695
chr1	236087035	236087280
chr1	236095425	236095819
chr1	236162824	236163266
chr1	236247155	236247409
chr1	236694893	236695302
chr1	237922431	237923174
chr1	237924200	237924742
chr1	238215793	238216100
chr1	239059324	239059631
chr1	240473778	240474034
chr1	240960377	240960807
chr1	241746162	241746715
chr1	241804564	241805338
chr1	241852142	241852572
chr1	242161806	242162222
chr1	242694071	242694489
chr1	242709826	242710672
chr1	242719682	242720373
chr1	242792702	242793143
chr1	242974446	242974760
chr1	243419026	243419658
chr1	243651047	243651355
chr1	243962079	243962454
chr1	244014037	244014601
chr1	244087589	244087994
chr1	244327203	244327573
chr1	244466206	244466629
chr1	244467527	244467778
chr1	244532953	244533265
chr1	244534929	244535294
chr1	244614988	244615624
chr1	244898734	244899027
chr1	244998164	244999261
chr1	245879339	245879645
chr1	246868753	246868986
chr1	247095062	247095589
chr1	247373888	247374309
chr1	247692418	247692783
chr1	249132300	249132548
chr10	384234	384947
chr10	592873	593192
chr10	1033766	1034311
chr10	1331789	1332132
chr10	2020768	2021068
chr10	2154100	2154598
chr10	2159782	2160260
chr10	3133654	3134067
chr10	3137676	3138157
chr10	3149702	3150196
chr10	3164766	3164996
chr10	3466555	3466954
chr10	3509621	3510173
chr10	3511196	3511664
chr10	3528573	3528843
chr10	3782535	3782939
chr10	3805136	3805664
chr10	3819012	3819603
chr10	3848182	3849107
chr10	3852283	3852806
chr10	3867429	3867890
chr10	4012513	4012938
chr10	4705314	4705615
chr10	5333772	5334093
chr10	5530413	5531007
chr10	5580756	5581119
chr10	5588848	5589505
chr10	5589886	5590357
chr10	5590850	5591278
chr10	5593553	5594090
chr10	5606033	5606393
chr10	5607603	5608216
chr10	5625834	5626067
chr10	5626739	5627348
chr10	5631181	5631412
chr10	5637884	5638413
chr10	5638831	5639270
chr10	5651888	5652220
chr10	5855334	5855628
chr10	5931830	5932221
chr10	6205818	6206053
chr10	6333115	6333473
chr10	6771116	6771382
chr10	6779169	6779526
chr10	6790798	6791133
chr10	6821053	6821663
chr10	8408093	8408617
chr10	9011859	9012214
chr10	9867344	9867717
chr10	10828403	10828694
chr10	10834689	10834957
chr10	10836872	10837176
chr10	11729320	11729641
chr10	11761447	11761811
chr10	11835893	11836321
chr10	11852262	11852605
chr10	11917734	11918242
chr10	11923456	11924949
chr10	11928963	11929246
chr10	11940243	11940943
chr10	12085075	12085479
chr10	12110595	12111041
chr10	12237842	12238166
chr10	12628706	12629060
chr10	12792882	12793388
chr10	13344293	13344575
chr10	13425439	13425747
chr10	13924080	13924556
chr10	14011083	14011467
chr10	14634136	14634407
chr10	15001281	15001743
chr10	15242651	15243027
chr10	16859308	16859924
chr10	17243443	17243776
chr10	17270399	17270812
chr10	17271934	17272898
chr10	17569460	17569919
chr10	18916388	18916925
chr10	20820146	20820718
chr10	21463358	21463591
chr10	21480508	21480900
chr10	21625529	21626057
chr10	21661802	21662191
chr10	21785670	21786398
chr10	22016570	22016842
chr10	22040294	22040576
chr10	22535394	22536218
chr10	22725717	22726138
chr10	22802756	22803068
chr10	22909372	22909766
chr10	23112196	23112459
chr10	23673247	23673669
chr10	23721167	23721459
chr10	24544095	24544336
chr10	24671935	24672844
chr10	24772654	24773037
chr10	24841381	24841642
chr10	25013257	25013675
chr10	25020815	25021254
chr10	25103806	25104085
chr10	25178651	25178896
chr10	25190759	25191018
chr10	25305321	25305576
chr10	25348828	25349194
chr10	25351374	25351745
chr10	26637787	26638018
chr10	26986004	26986464
chr10	27148935	27149293
chr10	27608657	27609274
chr10	28687522	28687850
chr10	29431444	29431775
chr10	29768024	29768330
chr10	29790700	29791104
chr10	29919551	29919813
chr10	29947810	29948528
chr10	29957493	29958026
chr10	29970779	29971047
chr10	30024683	30025011
chr10	30096505	30096761
chr10	30151987	30152221
chr10	30154600	30154926
chr10	30235766	30236151
chr10	30236550	30236801
chr10	30654255	30654519
chr10	30676527	30677035
chr10	30971327	30971715
chr10	31321301	31321603
chr10	31364226	31364843
chr10	31365555	31365896
chr10	32229790	32230105
chr10	32428284	32428750
chr10	32635219	32635450
chr10	32735074	32735440
chr10	33247201	33247667
chr10	33269427	33269876
chr10	33271304	33271641
chr10	33272225	33272698
chr10	33294343	33294844
chr10	33298942	33299739
chr10	33423025	33423305
chr10	33425300	33425544
chr10	33434278	33434709
chr10	33444804	33445372
chr10	33482953	33483345
chr10	33505759	33506078
chr10	33553195	33553532
chr10	33624512	33625197
chr10	33654797	33655346
chr10	33873564	33873792
chr10	34608552	34608843
chr10	35010225	35010468
chr10	35047551	35047912
chr10	35057650	35057915
chr10	35178347	35178641
chr10	35280925	35281332
chr10	35294816	35295115
chr10	35415734	35415985
chr10	35589036	35589375
chr10	35736841	35737366
chr10	36147668	36148136
chr10	36176694	36176933
chr10	36823615	36823850
chr10	38265348	38265814
chr10	43133373	43134048
chr10	43160592	43161214
chr10	43932197	43932820
chr10	43950880	43951307
chr10	44109227	44109534
chr10	45857744	45858245
chr10	46090226	46090504
chr10	46222439	46222834
chr10	47056864	47057163
chr10	47152583	47153177
chr10	47655641	47656111
chr10	47746660	47747087
chr10	48332069	48333058
chr10	48342641	48343097
chr10	49197146	49197387
chr10	49199744	49200222
chr10	50595111	50595616
chr10	50627062	50627432
chr10	50760100	50760604
chr10	50776320	50776755
chr10	50777003	50777530
chr10	52178016	52178389
chr10	52346295	52346555
chr10	52384247	52384788
chr10	54073717	54074085
chr10	54078359	54079398
chr10	54095702	54095935
chr10	54125451	54126033
chr10	54203137	54203852
chr10	54299287	54299541
chr10	54643735	54644060
chr10	59658002	59658339
chr10	60028590	60028860
chr10	60094550	60094910
chr10	60228418	60228711
chr10	60567411	60567784
chr10	60616277	60616624
chr10	61725006	61725492
chr10	61883018	61883349
chr10	62520469	62520835
chr10	63752484	63752819
chr10	64214359	64214735
chr10	64679568	64679887
chr10	65280587	65280914
chr10	65312823	65313084
chr10	65313326	65314055
chr10	65389933	65390409
chr10	65471803	65472338
chr10	67621105	67621340
chr10	69524017	69524403
chr10	69834345	69835092
chr10	69857031	69857292
chr10	70091356	70091768
chr10	70992095	70992830
chr10	71097219	71097806
chr10	71108954	71109455
chr10	71120473	71120975
chr10	71198397	71198626
chr10	71218559	71219040
chr10	71624251	71624515
chr10	71628637	71629508
chr10	71892470	71892850
chr10	71906548	71906829
chr10	71930236	71930470
chr10	72015544	72015826
chr10	72027195	72027719
chr10	72338128	72338637
chr10	72576154	72576455
chr10	72972046	72972313
chr10	73003734	73004094
chr10	73006519	73007292
chr10	73015603	73016176
chr10	73099660	73100160
chr10	73109142	73109561
chr10	73124387	73124820
chr10	73489138	73489419
chr10	73526387	73527223
chr10	73533269	73533847
chr10	73597924	73598514
chr10	73610928	73611170
chr10	73627819	73628272
chr10	73734172	73734870
chr10	73758512	73758822
chr10	73787928	73788241
chr10	73857436	73857900
chr10	74003805	74004089
chr10	74008261	74008954
chr10	74014884	74015141
chr10	74020187	74020922
chr10	74023248	74023586
chr10	74031852	74032862
chr10	74033321	74033761
chr10	74036516	74037033
chr10	74051895	74052354
chr10	74057079	74058110
chr10	74068255	74068692
chr10	74079069	74080021
chr10	74081337	74082636
chr10	74091444	74092051
chr10	74094661	74095144
chr10	74114364	74114995
chr10	74385748	74386083
chr10	74425735	74426082
chr10	74436231	74436482
chr10	75006580	75007285
chr10	75012118	75012488
chr10	75255299	75255545
chr10	75531964	75532196
chr10	75587233	75587462
chr10	75647219	75647951
chr10	75648751	75649133
chr10	75666472	75666742
chr10	75668662	75669045
chr10	75692125	75692487
chr10	75700431	75700724
chr10	75725926	75726242
chr10	75758810	75759422
chr10	75815546	75816184
chr10	75878609	75878887
chr10	75910099	75910453
chr10	75936128	75936613
chr10	75949808	75950167
chr10	76053555	76054229
chr10	76585660	76586186
chr10	76969734	76970545
chr10	77003412	77003667
chr10	77010701	77011058
chr10	77162141	77162447
chr10	77531412	77531700
chr10	77533080	77533639
chr10	78766964	78767257
chr10	79110511	79110821
chr10	79152435	79152948
chr10	79169812	79170126
chr10	79273641	79274153
chr10	79497249	79497807
chr10	79658283	79659226
chr10	80218815	80219056
chr10	80679805	80680140
chr10	80687070	80687395
chr10	80778417	80778687
chr10	80827080	80827443
chr10	80909423	80910233
chr10	80911427	80911835
chr10	80917372	80917900
chr10	80941455	80941762
chr10	80943991	80944288
chr10	80949741	80950132
chr10	81024604	81024861
chr10	81077450	81077708
chr10	81708996	81709429
chr10	81744628	81744904
chr10	81838699	81839076
chr10	81923490	81924163
chr10	81963936	81964310
chr10	81965225	81965543
chr10	81966898	81967435
chr10	82189332	82189815
chr10	82218865	82219179
chr10	82231373	82231801
chr10	82254986	82255406
chr10	82265373	82266321
chr10	82295752	82295999
chr10	82301813	82302156
chr10	85743422	85743736
chr10	86254128	86254370
chr10	86299837	86300109
chr10	87661913	87662212
chr10	88014310	88014558
chr10	88105592	88106292
chr10	88160058	88160328
chr10	88295256	88295528
chr10	88345256	88345507
chr10	88718444	88719220
chr10	88728068	88728427
chr10	88730712	88732099
chr10	88734281	88734595
chr10	88854980	88855419
chr10	89176727	89176973
chr10	89622110	89622352
chr10	90145255	90145769
chr10	90188379	90188625
chr10	90792105	90792368
chr10	91111642	91112136
chr10	91313234	91313538
chr10	91404904	91405247
chr10	91681168	91681608
chr10	91767072	91767351
chr10	91811232	91811626
chr10	91987046	91987350
chr10	92244267	92244682
chr10	92347008	92347240
chr10	92594117	92594350
chr10	92680960	92681382
chr10	92690907	92691187
chr10	93998562	93998843
chr10	94731919	94732277
chr10	95048653	95049165
chr10	95093112	95094214
chr10	95094570	95095244
chr10	95143691	95144340
chr10	95184810	95185272
chr10	95198466	95198920
chr10	95205267	95205577
chr10	95218572	95218984
chr10	95224598	95224964
chr10	95225457	95226306
chr10	95230486	95231126
chr10	95235521	95236078
chr10	95242010	95242569
chr10	95255528	95255885
chr10	95256127	95256439
chr10	95506710	95507040
chr10	95714164	95714869
chr10	96618808	96619170
chr10	96988995	96989588
chr10	97007642	97007902
chr10	97023870	97024426
chr10	97026517	97026858
chr10	97049432	97049703
chr10	97118235	97118588
chr10	97889772	97890277
chr10	98027085	98027375
chr10	98265135	98265481
chr10	98829751	98830007
chr10	99078669	99078939
chr10	99168183	99168559
chr10	99258197	99258495
chr10	99334428	99334762
chr10	99408834	99409088
chr10	99411563	99411844
chr10	99447010	99447530
chr10	99449417	99449710
chr10	99478285	99478941
chr10	99599839	99600194
chr10	99642188	99642579
chr10	99894172	99894514
chr10	100028974	100029452
chr10	100074366	100074740
chr10	100164312	100164610
chr10	101155577	101156099
chr10	101190400	101190701
chr10	101380341	101381337
chr10	101491913	101492260
chr10	101535712	101536065
chr10	101803624	101803890
chr10	102130902	102131392
chr10	102270834	102271075
chr10	102295545	102295850
chr10	102757586	102758339
chr10	102772532	102772785
chr10	102820740	102821022
chr10	102825831	102826653
chr10	102827501	102827737
chr10	103113653	103113895
chr10	103127441	103127886
chr10	103318020	103318277
chr10	103329708	103330218
chr10	103577856	103578543
chr10	103590355	103590639
chr10	103824946	103825247
chr10	103893366	103893605
chr10	103911653	103912162
chr10	104153840	104154307
chr10	104262542	104262780
chr10	104389395	104389721
chr10	104405603	104406440
chr10	104429189	104429639
chr10	104433739	104434157
chr10	104503432	104503744
chr10	104542696	104542932
chr10	104874650	104875123
chr10	104998731	104999006
chr10	105001209	105001747
chr10	105014705	105015054
chr10	105210935	105211322
chr10	105231030	105231437
chr10	105238908	105239209
chr10	105264041	105264493
chr10	105413609	105413890
chr10	105435926	105436286
chr10	105456313	105456736
chr10	105505035	105505953
chr10	105506911	105507346
chr10	105541330	105541654
chr10	105544716	105545091
chr10	105631821	105632400
chr10	105650071	105650451
chr10	105660120	105660418
chr10	105668077	105668486
chr10	105845539	105846068
chr10	105869586	105869964
chr10	105877410	105877978
chr10	106082168	106082444
chr10	106568971	106569597
chr10	106908247	106908680
chr10	106909109	106909622
chr10	107003191	107003596
chr10	107173696	107174024
chr10	107344983	107345351
chr10	108183831	108184165
chr10	108200527	108200790
chr10	108266366	108266635
chr10	109731751	109732282
chr10	111836526	111837026
chr10	112113332	112113909
chr10	112155746	112155999
chr10	112158298	112159241
chr10	112167982	112168501
chr10	112170209	112170640
chr10	112174269	112174832
chr10	112257440	112257672
chr10	112290005	112290377
chr10	112295906	112296181
chr10	112327370	112327633
chr10	112534680	112534992
chr10	112632064	112632481
chr10	113987331	113987894
chr10	114149208	114149495
chr10	114284992	114285221
chr10	114575387	114575641
chr10	114833458	114833956
chr10	114847113	114847387
chr10	114853307	114854019
chr10	115859995	115860255
chr10	116066335	116066620
chr10	116080286	116080892
chr10	116280265	116280614
chr10	116304292	116304541
chr10	116514453	116514689
chr10	117614520	117614841
chr10	118394025	118394287
chr10	118534360	118534731
chr10	118764470	118764883
chr10	118837713	118838205
chr10	118846128	118846388
chr10	118946481	118946887
chr10	118980764	118981088
chr10	119258818	119259157
chr10	120260687	120260925
chr10	120458026	120458356
chr10	120514245	120514824
chr10	120599654	120599980
chr10	120719745	120720062
chr10	120763172	120763726
chr10	120850536	120850902
chr10	120937992	120938443
chr10	121030516	121030961
chr10	121209549	121209880
chr10	121226183	121226515
chr10	121302268	121302703
chr10	121439592	121439927
chr10	121440270	121440645
chr10	121441579	121442197
chr10	121446071	121446616
chr10	121497431	121497678
chr10	122179819	122180261
chr10	122267978	122268638
chr10	122610705	122610988
chr10	122762162	122762411
chr10	122828746	122829023
chr10	122838113	122838636
chr10	122918715	122919680
chr10	122924843	122925189
chr10	123084261	123084582
chr10	123822682	123823085
chr10	123844955	123845285
chr10	123900751	123901094
chr10	124053381	124053890
chr10	124060538	124061059
chr10	124228542	124228855
chr10	124768266	124768545
chr10	124869035	124869373
chr10	124899057	124899329
chr10	125754190	125755533
chr10	125757027	125757469
chr10	125853070	125853369
chr10	126029634	126030133
chr10	126124853	126125157
chr10	126213502	126213838
chr10	126315587	126316204
chr10	126408029	126408275
chr10	126552920	126553243
chr10	126734293	126734780
[truncated: 11,527 more rows]

## Sheet: S5C differential binding analys
			baseMean	log2FoldChange	lfcSE	stat	pvalue	padj
chr22	24371889	24373283	146.25	9.19318	1.32118	6.95831	3.44369e-12	6.07476e-11
chr6	47472584	47473378	128.25	9.01809	1.32571	6.80244	1.02859e-11	1.64147e-10
chr3	108476257	108477001	202.5	8.6583	1.04663	8.27256	1.31109e-16	5.23945e-15
chr6	167834810	167835313	97.5	8.64951	1.33693	6.46967	9.82171e-11	1.27497e-09
chr10	15373330	15373978	156.5	8.29484	1.06571	7.78341	7.05933e-15	2.13176e-13
chrX	130712549	130713328	74.25	8.26103	1.35818	6.08245	1.18362e-09	1.24659e-08
chr8	63529652	63530118	73.5	8.25101	1.35712	6.07979	1.20336e-09	1.26303e-08
chr1	163615293	163615943	64.25	8.02299	1.38326	5.80006	6.62898e-09	6.0156e-08
chr18	10213383	10213902	188.5	7.95513	0.919928	8.64755	5.26152e-18	2.73037e-16
chr2	60319038	60319584	57.25	7.90615	1.3728	5.75916	8.45331e-09	7.48682e-08
chr9	100166907	100167473	178.25	7.87977	0.920539	8.55995	1.12915e-17	5.52431e-16
chr11	116433734	116434563	53	7.80721	1.37458	5.67972	1.34914e-08	1.13965e-07
chr17	69094114	69095039	222.25	7.77779	0.817023	9.51968	1.73716e-21	1.53473e-19
chr18	10077962	10078962	214	7.72116	0.821619	9.39749	5.58781e-21	4.5082e-19
chrX	78086423	78086808	50	7.71863	1.38195	5.58531	2.33288e-08	1.88144e-07
chr11	76797667	76798660	370	7.68964	0.656806	11.7076	1.16481e-31	2.96472e-29
chr20	61005083	61006172	469.5	7.66601	0.598657	12.8053	1.5304e-37	7.11301e-35
chr6	40682058	40682939	756	7.60834	0.50726	14.9989	7.46467e-51	8.39972e-48
chr11	77801720	77802303	95	7.59793	1.10175	6.89623	5.34024e-12	9.14858e-11
chr4	82739493	82740069	91.25	7.52395	1.11451	6.75088	1.4695e-11	2.27501e-10
chr4	3768869	3769682	43	7.509	1.39283	5.3912	6.99886e-08	5.10354e-07
chr13	23367340	23368470	325	7.50035	0.666697	11.25	2.31551e-29	5.05159e-27
chr11	86958365	86958979	42.75	7.493	1.3967	5.36478	8.1046e-08	5.8205e-07
chr6	41423981	41425306	454.5	7.45464	0.599101	12.443	1.52567e-35	6.0405e-33
chr1	55114757	55115232	82.5	7.38714	1.12028	6.594	4.28122e-11	5.98252e-10
chr6	41486872	41488167	1212	7.38133	0.437795	16.8602	8.82152e-64	2.35755e-60
chr3	127261205	127261936	124	7.36641	0.943287	7.8093	5.75081e-15	1.75646e-13
chr11	31071665	31072148	38.75	7.33681	1.41261	5.19379	2.06054e-07	1.35719e-06
chrX	64313411	64313950	37.5	7.31009	1.40686	5.19604	2.03579e-07	1.34213e-06
chr7	121878450	121879355	119.25	7.30379	0.951532	7.67582	1.64368e-14	4.69812e-13
chr11	91759860	91760728	200.25	7.29413	0.771809	9.4507	3.36586e-21	2.82204e-19
chr15	54136249	54137035	280	7.2794	0.682674	10.6631	1.51521e-26	2.59162e-24
chr8	85206839	85207877	557	7.27058	0.522267	13.9212	4.71048e-44	3.24871e-41
chr3	14354168	14354719	74.25	7.24815	1.12422	6.44728	1.13875e-10	1.46488e-09
chrX	121877905	121878269	36	7.24351	1.4143	5.12162	3.02929e-07	1.92871e-06
chr18	10131413	10132552	349.25	7.24138	0.609455	11.8817	1.47293e-32	4.19883e-30
chr11	130854116	130854791	149.5	7.20926	0.842993	8.55198	1.2099e-17	5.87901e-16
chr2	43206536	43207381	257.5	7.1642	0.68008	10.5343	5.99993e-26	9.29555e-24
chr17	1227434	1227807	33.75	7.15599	1.41835	5.04529	4.52835e-07	2.76855e-06
chr11	74290613	74291295	209.75	7.09249	0.727249	9.75249	1.79999e-22	1.92418e-20
chr11	116450753	116451350	101.25	7.07194	0.962848	7.34481	2.06052e-13	4.64705e-12
chr17	37872451	37873654	931.75	7.05522	0.445654	15.8312	1.89644e-56	3.11891e-53
chr21	45875541	45876118	30.5	7.00518	1.43082	4.89592	9.78483e-07	5.57272e-06
chr8	128582141	128583087	830.25	7.00226	0.450787	15.5334	2.06102e-54	2.93763e-51
chr20	14630380	14630648	30.5	7.00095	1.43269	4.88657	1.02606e-06	5.81427e-06
chr11	129613340	129613764	96.75	6.99932	0.972493	7.19729	6.14189e-13	1.25539e-11
chr14	38678129	38678437	30.75	6.98788	1.44272	4.84354	1.27546e-06	7.06275e-06
chr3	40201958	40202455	30.75	6.97352	1.44895	4.81282	1.48818e-06	8.12495e-06
chr10	98371782	98372599	127	6.968	0.861391	8.08924	6.00375e-16	2.16095e-14
chr19	34295105	34295561	60.75	6.95625	1.14739	6.06268	1.33876e-09	1.39122e-08
chr7	156406897	156407997	157.5	6.94621	0.790003	8.79264	1.46084e-18	8.35103e-17
chr2	79338218	79338866	60	6.93519	1.15054	6.02777	1.66235e-09	1.69971e-08
chr2	78058088	78058596	59.75	6.9317	1.14958	6.02978	1.64184e-09	1.67955e-08
chr6	40867173	40867996	467.25	6.91604	0.520516	13.2869	2.75777e-40	1.6846e-37
chr20	17844248	17844836	90.5	6.90888	0.974018	7.09317	1.31074e-12	2.49988e-11
chr11	82654310	82654743	57.25	6.87231	1.15308	5.95994	2.52335e-09	2.48614e-08
chrX	100138331	100138906	27.75	6.86439	1.44269	4.75806	1.95467e-06	1.03699e-05
chr2	43232138	43233528	390.75	6.8605	0.557238	12.3116	7.84358e-35	2.8423e-32
chr18	28842132	28842583	88.75	6.85627	0.994933	6.89119	5.53273e-12	9.46319e-11
chr5	128713220	128713645	56	6.84006	1.1558	5.91803	3.25829e-09	3.14219e-08
chr17	39787520	39787979	353.75	6.83937	0.562662	12.1554	5.37146e-34	1.7944e-31
chr13	48196213	48196928	204.75	6.83663	0.688952	9.92323	3.29912e-23	3.75187e-21
chr2	65413128	65413946	115.75	6.83376	0.869214	7.862	3.78057e-15	1.19392e-13
chr8	74096706	74097760	501.75	6.82958	0.516631	13.2194	6.77677e-40	3.91588e-37
chr17	55491198	55491988	203.25	6.82448	0.691468	9.86955	5.6418e-23	6.28237e-21
chr18	19708871	19709383	55	6.81337	1.15823	5.88257	4.03945e-09	3.82817e-08
chr18	14225303	14225631	55	6.80696	1.16186	5.8587	4.66517e-09	4.37078e-08
chr4	9543247	9543561	26.25	6.78032	1.45032	4.67504	2.9389e-06	1.50212e-05
chr4	9597292	9597781	82.25	6.77319	0.981199	6.90297	5.09256e-12	8.74529e-11
chr20	15577777	15578510	166	6.76013	0.735677	9.189	3.96521e-20	2.80716e-18
chr2	136966749	136967548	247.75	6.74267	0.631112	10.6838	1.21224e-26	2.10713e-24
chr21	35894610	35895035	51.5	6.71733	1.16641	5.75895	8.46372e-09	7.49293e-08
chr13	96392455	96393154	78.5	6.69953	0.990694	6.76246	1.35667e-11	2.1157e-10
chr4	9154792	9155253	25	6.69429	1.46247	4.57739	4.70824e-06	2.29927e-05
chr11	74176175	74177152	722.75	6.68819	0.45217	14.7913	1.66676e-49	1.54936e-46
chr20	11198760	11199492	319	6.67984	0.584813	11.4222	3.23971e-30	7.61154e-28
chr6	168547814	168548479	103	6.66982	0.874355	7.62828	2.3791e-14	6.65774e-13
chr4	124270510	124270919	102.75	6.66705	0.87383	7.62969	2.35321e-14	6.59392e-13
chr11	66585549	66586099	128	6.64856	0.803102	8.2786	1.24632e-16	5.02014e-15
chr18	5746674	5747297	49	6.64152	1.17446	5.65494	1.55896e-08	1.30504e-07
chr19	52207175	52207697	100.75	6.62892	0.885063	7.48978	6.8989e-14	1.72513e-12
chr13	106574070	106574628	124	6.59541	0.813699	8.10546	5.25448e-16	1.91708e-14
chr9	116880436	116881101	173	6.59059	0.702737	9.37846	6.69423e-21	5.34039e-19
chr10	115385189	115385614	72.5	6.58679	0.99678	6.60807	3.89367e-11	5.49483e-10
chrX	121589714	121590279	72.25	6.5818	0.997118	6.60082	4.08886e-11	5.74753e-10
chr22	33935679	33936849	147.75	6.57812	0.760722	8.6472	5.278e-18	2.73229e-16
chr3	63178039	63178402	70	6.53628	1.00011	6.53559	6.33602e-11	8.57911e-10
chr19	39695508	39695955	45.25	6.51887	1.18825	5.48612	4.10853e-08	3.13716e-07
chr15	47339999	47340692	93.25	6.5168	0.892044	7.30547	2.76289e-13	6.09604e-12
chr18	8732548	8733116	187.75	6.51176	0.672429	9.68394	3.52845e-22	3.50875e-20
chr6	43734296	43735310	351.25	6.50166	0.5348	12.1572	5.25358e-34	1.78288e-31
chr18	10750105	10751080	185.5	6.49623	0.670298	9.69156	3.27498e-22	3.30278e-20
chr6	65011208	65012045	234	6.49104	0.639672	10.1475	3.40102e-24	4.30259e-22
chr14	90978737	90979356	115.5	6.48418	0.828811	7.82348	5.1384e-15	1.58527e-13
chr8	26515401	26516928	418.25	6.47729	0.528611	12.2534	1.61078e-34	5.64564e-32
chr6	45491987	45493046	739.25	6.47368	0.438697	14.7566	2.78988e-49	2.38591e-46
chr11	26134911	26135674	66.25	6.45389	1.00791	6.40325	1.52105e-10	1.9184e-09
chr22	29307821	29308630	88.75	6.45284	0.888869	7.2596	3.88235e-13	8.30878e-12
chr7	155746534	155747225	248.75	6.45215	0.601281	10.7307	7.30616e-27	1.3183e-24
chr9	104116795	104118208	316.25	6.44947	0.550293	11.7201	1.00596e-31	2.59125e-29
chr19	16364613	16364970	43	6.44397	1.19508	5.3921	6.96401e-08	5.08332e-07
chr14	44120571	44121342	154	6.42305	0.70911	9.0579	1.32982e-19	8.91268e-18
chr15	80154416	80154868	65	6.42249	1.01298	6.34021	2.29448e-10	2.8016e-09
chr14	65405012	65405609	154	6.42191	0.710709	9.03592	1.62631e-19	1.06986e-17
chr3	191797903	191798621	220	6.40962	0.630299	10.1692	2.72213e-24	3.46424e-22
chr11	123458158	123459517	307.75	6.40335	0.564172	11.35	7.41755e-30	1.72377e-27
chr16	52595764	52596445	107.75	6.39881	0.817212	7.83005	4.87663e-15	1.51544e-13
chr10	102730853	102731593	196.75	6.39786	0.661544	9.67109	4.00095e-22	3.92387e-20
chr19	51830957	51831233	20.5	6.39417	1.49046	4.29006	1.78621e-05	7.6716e-05
chr8	6692093	6692554	41.75	6.39243	1.20374	5.31048	1.09338e-07	7.64687e-07
chr15	93188369	93188974	106.25	6.38062	0.815911	7.82024	5.27243e-15	1.62427e-13
chr15	40642846	40643383	150	6.37775	0.720877	8.84721	8.97382e-19	5.25644e-17
chr16	1204651	1205376	62.25	6.3697	1.0095	6.30973	2.7952e-10	3.3555e-09
chr12	50262735	50263256	83.75	6.36757	0.895393	7.11148	1.14803e-12	2.21724e-11
chr8	85533189	85533917	170.75	6.36482	0.692325	9.19339	3.80634e-20	2.70364e-18
chr15	32325477	32325990	40.5	6.36245	1.1995	5.30424	1.13142e-07	7.8897e-07
chr13	97577994	97578841	170	6.36046	0.689648	9.22276	2.89556e-20	2.11188e-18
chr18	8797165	8797651	126.5	6.3593	0.764479	8.31848	8.90995e-17	3.74253e-15
chr18	19581642	19582322	360.5	6.35699	0.517067	12.2943	9.71673e-35	3.4624e-32
chr12	54529185	54529884	124.5	6.3389	0.762216	8.31641	9.0667e-17	3.8009e-15
chr11	74878470	74880179	541.25	6.3388	1.04152	6.08613	1.15671e-09	1.22066e-08
chr18	10404872	10405405	269.75	6.32678	0.569026	11.1186	1.01843e-28	2.13472e-26
chr2	219645387	219646178	187.5	6.32599	0.667685	9.47451	2.68003e-21	2.28321e-19
chr2	149981512	149982036	82.25	6.32523	0.913139	6.92691	4.3014e-12	7.47675e-11
chr18	11121087	11121862	103.75	6.32512	0.84179	7.51389	5.73943e-14	1.46513e-12
chr22	29319658	29320295	144.75	6.31943	0.732543	8.62671	6.31445e-18	3.22451e-16
chr6	43648879	43649801	225.75	6.30972	0.609525	10.3519	4.10407e-25	5.92872e-23
chr15	53832838	53833507	80.75	6.30922	0.904267	6.97716	3.01207e-12	5.36205e-11
chrX	115008429	115008815	39	6.30634	1.20506	5.23323	1.66577e-07	1.11783e-06
chr12	115908096	115908955	454	6.30394	0.50497	12.4838	9.15419e-36	3.83758e-33
chr17	39963021	39964053	713.75	6.2947	0.427083	14.7388	3.6299e-49	2.98489e-46
chr1	77013550	77013913	59.5	6.2924	1.02393	6.14533	7.97963e-10	8.68216e-09
chr14	57322528	57323114	59.25	6.28918	1.02204	6.15353	7.57772e-10	8.27012e-09
chr18	8959502	8960078	140	6.28199	0.719709	8.72851	2.58053e-18	1.42195e-16
chr11	2232171	2232899	161	6.2807	0.694525	9.04316	1.52212e-19	1.00752e-17
chr3	11992007	11992443	59	6.28057	1.02451	6.1303	8.77145e-10	9.42854e-09
chr22	17212079	17212489	79	6.27017	0.913589	6.86323	6.73229e-12	1.12387e-10
chr3	107856001	107856546	58.5	6.26909	1.02474	6.11774	9.49088e-10	1.01508e-08
chr11	77182800	77183347	259.5	6.269	0.573885	10.9238	8.8717e-28	1.69354e-25
chr19	52052693	52053337	139	6.26401	0.730797	8.57148	1.02161e-17	5.0327e-16
chr19	51981170	51981985	79.5	6.26319	0.928824	6.74314	1.55003e-11	2.37731e-10
chr9	136155846	136156537	178.5	6.26159	0.659853	9.48937	2.32424e-21	2.00372e-19
chr13	78640997	78641902	98.75	6.26022	0.838416	7.46672	8.22178e-14	2.01677e-12
chr6	129512229	129512888	98.75	6.26011	0.838537	7.46551	8.29755e-14	2.03209e-12
chr6	40262957	40263843	236.75	6.25266	0.59107	10.5786	3.74693e-26	6.06889e-24
chr3	137482936	137483237	38	6.24336	1.22279	5.10584	3.29335e-07	2.07827e-06
chr3	134825104	134825581	134.25	6.21934	0.725211	8.57591	9.83037e-18	4.85389e-16
chr19	52053954	52055090	192	6.21334	0.636215	9.7661	1.57396e-22	1.70819e-20
chr17	70399918	70400457	172.75	6.20677	0.673394	9.21715	3.05108e-20	2.20379e-18
chr11	128258047	128258523	94.25	6.20239	0.831091	7.46295	8.4607e-14	2.06968e-12
chr17	37851680	37852148	419.75	6.20183	0.48128	12.8861	5.38929e-38	2.7434e-35
chr8	90547403	90548162	229	6.20157	0.597889	10.3724	3.30968e-25	4.94831e-23
chr7	52214567	52215373	169.25	6.18797	0.657379	9.41309	4.81745e-21	3.93119e-19
chr15	54083867	54084487	74.25	6.17645	0.923286	6.68964	2.23719e-11	3.31701e-10
chr11	117094963	117095758	112.5	6.17401	0.792835	7.78726	6.8478e-15	2.07668e-13
chr9	71409763	71410604	299	6.16125	0.558764	11.0266	2.84498e-28	5.73826e-26
chr5	116556090	116556765	129.25	6.15777	0.737047	8.35465	6.56292e-17	2.81758e-15
chr1	163640752	163641651	204.75	6.15235	0.641845	9.58541	9.20886e-22	8.45002e-20
chr21	15442267	15443408	146.25	6.14883	0.689557	8.91706	4.78811e-19	2.8918e-17
chr18	8367232	8367746	54	6.14875	1.03694	5.92971	3.03472e-09	2.94117e-08
chr15	100875554	100875881	35.5	6.14741	1.23002	4.9978	5.79873e-07	3.46719e-06
chr7	117212755	117213562	405.75	6.14634	0.496905	12.3692	3.83476e-35	1.43837e-32
chr18	25481576	25482106	91	6.14447	0.842228	7.29549	2.97571e-13	6.53862e-12
chr6	80921561	80922212	146.5	6.14065	0.705485	8.70414	3.19985e-18	1.71461e-16
chrX	90363655	90364172	72.25	6.13776	0.925015	6.6353	3.23833e-11	4.65918e-10
chr18	9700423	9700786	72	6.13347	0.924616	6.63353	3.27756e-11	4.70929e-10
chr6	24148251	24148817	53.25	6.12625	1.04029	5.88898	3.88578e-09	3.69399e-08
chr4	72472206	72472696	53	6.12163	1.03902	5.89176	3.82112e-09	3.63576e-08
chr10	87170198	87170861	143.5	6.12139	0.690631	8.86348	7.75523e-19	4.56768e-17
chr9	141044285	141045004	34.5	6.11859	1.22653	4.98856	6.08322e-07	3.6208e-06
chr2	121496725	121497238	53.75	6.11661	1.0579	5.78185	7.38842e-09	6.63438e-08
chr17	63543208	63544046	178.75	6.10996	0.639706	9.5512	1.28204e-21	1.15654e-19
chr11	74870584	74871993	214.25	6.10759	0.59649	10.2392	1.32305e-24	1.73538e-22
chr11	76786285	76787072	214	6.10755	0.593469	10.2913	7.71526e-25	1.05739e-22
chr2	111808514	111809029	70.25	6.09642	0.928364	6.56684	5.13931e-11	7.05253e-10
chr17	63285990	63287416	445.5	6.09283	0.48783	12.4897	8.50161e-36	3.70948e-33
chr6	42114830	42115475	303.75	6.08423	0.57358	10.6075	2.75085e-26	4.59477e-24
chr6	52192487	52193765	334	6.07917	0.51678	11.7636	6.01478e-32	1.60745e-29
chr4	57083337	57083988	123.25	6.07634	0.757724	8.01921	1.06429e-15	3.67601e-14
chr6	78202125	78202758	210	6.07485	0.604245	10.0536	8.85545e-24	1.06966e-21
chrX	11257358	11257873	51	6.07368	1.03684	5.85787	4.68847e-09	4.38877e-08
chr2	8633085	8633929	174	6.07309	0.637475	9.52679	1.62227e-21	1.4441e-19
chr11	1240879	1241827	191.75	6.06906	0.625109	9.70881	2.76538e-22	2.8289e-20
chr10	127600398	127600980	120.75	6.06541	0.732982	8.27498	1.28479e-16	5.14397e-15
chr18	12700822	12701685	225	6.06234	0.580104	10.4504	1.4584e-25	2.22718e-23
chr1	241355182	241355722	155	6.05163	0.676786	8.94172	3.83155e-19	2.36759e-17
chr11	72497031	72497935	485.5	6.04918	0.483152	12.5202	5.7861e-36	2.57723e-33
chr13	95775683	95776614	309.25	6.04663	0.525517	11.5061	1.22982e-30	3.02224e-28
chr20	53719674	53720557	379.5	6.04646	0.505574	11.9596	5.78463e-33	1.71772e-30
chr6	43780829	43781413	170.25	6.04027	0.64078	9.42642	4.24306e-21	3.47574e-19
chr7	112220151	112220481	67.25	6.032	0.933754	6.45994	1.04743e-10	1.35475e-09
chr3	197547381	197548221	321	6.02355	0.513759	11.7245	9.54984e-32	2.48995e-29
chr18	19624175	19624772	100.75	6.02254	0.790659	7.61711	2.59409e-14	7.18415e-13
chr12	94292260	94292911	84.25	6.01979	0.863757	6.96931	3.18505e-12	5.64179e-11
chr11	129686990	129688062	403.5	6.01687	0.474993	12.6673	8.9772e-37	4.08367e-34
chr19	33795421	33796634	201.25	6.01665	0.599806	10.031	1.1139e-23	1.32071e-21
chr19	7616128	7616588	48.75	6.00143	1.0475	5.72927	1.00866e-08	8.75918e-08
chr18	3710886	3711655	66	5.99909	0.941301	6.37319	1.85142e-10	2.29869e-09
chr15	81149029	81149823	149.25	5.99583	0.680665	8.80878	1.26516e-18	7.31055e-17
chr3	168577054	168577624	83	5.99317	0.8707	6.88316	5.85391e-12	9.96469e-11
chr11	68173527	68174985	233.75	5.99038	0.603759	9.92182	3.34604e-23	3.78509e-21
chr2	2617033	2617490	99.25	5.98907	0.806874	7.42256	1.14877e-13	2.74116e-12
chr17	63429874	63430699	98.5	5.98687	0.796217	7.51914	5.51371e-14	1.41857e-12
chrX	84613800	84614650	147.5	5.98496	0.671312	8.91533	4.86367e-19	2.92917e-17
chr6	152926347	152926851	31.75	5.98457	1.24523	4.80599	1.53984e-06	8.38718e-06
chr8	35505060	35505835	114.5	5.98102	0.747127	8.00536	1.19116e-15	4.08125e-14
chr11	76237839	76238185	64.75	5.9782	0.936328	6.38473	1.71705e-10	2.14181e-09
chr6	45503595	45504244	180.5	5.97573	0.638217	9.36315	7.73912e-21	6.08318e-19
chr8	111940801	111941318	212	5.97422	0.58627	10.1902	2.19276e-24	2.8139e-22
chr22	42699459	42700547	178.5	5.96561	0.628176	9.49671	2.16617e-21	1.89806e-19
chr9	97054829	97055428	97	5.96384	0.798426	7.46949	8.05032e-14	1.97884e-12
chr15	45356450	45357158	112.75	5.95686	0.750813	7.93388	2.12406e-15	6.95442e-14
chr1	10997402	10998269	97.5	5.95266	0.821664	7.24463	4.33607e-13	9.14251e-12
chrX	39584200	39584734	79.25	5.94949	0.847703	7.01836	2.2448e-12	4.08111e-11
chr1	214120411	214121062	174.5	5.93441	0.626357	9.4745	2.68048e-21	2.28321e-19
chr1	59517734	59518285	149.75	5.93426	1.29906	4.56813	4.9209e-06	2.38948e-05
chr6	168662435	168663130	110.5	5.93395	0.743246	7.98384	1.41853e-15	4.78363e-14
chr4	175699559	175700187	46.75	5.93351	1.05813	5.60754	2.05222e-08	1.67659e-07
chr4	114562253	114562718	79.25	5.93011	0.870271	6.8141	9.4855e-12	1.52367e-10
chr12	131757946	131758353	30.75	5.93004	1.25414	4.72838	2.26315e-06	1.18565e-05
chr17	71952256	71954354	476.75	5.9289	0.461126	12.8575	7.8106e-38	3.79524e-35
chr1	3239681	3240448	94.75	5.92769	0.803014	7.3818	1.56163e-13	3.62121e-12
chr13	28540003	28540489	95.25	5.92612	0.814358	7.27705	3.41193e-13	7.36839e-12
chr1	22588965	22589503	143	5.92405	0.698718	8.47846	2.28196e-17	1.06758e-15
chr13	97126710	97127248	93.75	5.9211	0.792393	7.47243	7.87283e-14	1.94142e-12
chr17	27427255	27427696	236	5.91985	0.561906	10.5353	5.93941e-26	9.26895e-24
chr22	33973902	33974451	46	5.91971	1.052	5.62708	1.83283e-08	1.50889e-07
chr8	116008789	116009628	471.25	5.91394	0.456488	12.9553	2.19304e-38	1.17218e-35
chr2	42282866	42283529	156.25	5.91304	0.650275	9.09313	9.62302e-20	6.59424e-18
chr19	39303490	39304207	424	5.91224	0.473684	12.4814	9.431e-36	3.87759e-33
chr6	54852548	54853736	361	5.91042	0.499395	11.8352	2.56791e-32	7.03872e-30
chr14	80934827	80935441	186.25	5.90131	0.609114	9.68834	3.37983e-22	3.37901e-20
chr21	40288906	40289416	77.5	5.89924	0.870526	6.77664	1.23005e-11	1.93371e-10
chr3	11660284	11660773	77.5	5.89742	0.872619	6.7583	1.39617e-11	2.17092e-10
chr6	41672463	41673058	185.5	5.89152	0.616615	9.55461	1.24056e-21	1.12386e-19
chr2	189145643	189145987	61.25	5.89083	0.948673	6.20954	5.3139e-10	5.99531e-09
chr4	74889108	74889972	342	5.88976	0.521893	11.2854	1.54969e-29	3.48762e-27
chr13	27535860	27537008	168.25	5.88294	0.625637	9.40312	5.29667e-21	4.2895e-19
chr4	85506413	85506782	75.75	5.87972	0.856676	6.86341	6.72354e-12	1.12387e-10
chrX	64415399	64415915	45	5.87402	1.06591	5.51083	3.57144e-08	2.76022e-07
chr11	56652385	56653210	184.25	5.87248	0.633729	9.26655	1.92258e-20	1.43723e-18
chr13	49946043	49946621	138	5.87188	0.701828	8.36654	5.93352e-17	2.5628e-15
chr1	113760197	113760827	75	5.86409	0.858965	6.82692	8.67544e-12	1.40836e-10
chr15	90572104	90572646	120.5	5.86282	0.709919	8.25844	1.47586e-16	5.87595e-15
chr19	16204346	16204970	164.5	5.85016	0.626916	9.33166	1.04228e-20	8.01579e-19
chr16	85568816	85569871	301.75	5.84993	0.529906	11.0396	2.46224e-28	5.11094e-26
chr5	127378940	127379522	134.25	5.84675	0.679683	8.60217	7.8223e-18	3.93508e-16
chr12	115912113	115913166	374.75	5.84588	0.48278	12.1088	9.4902e-34	3.12155e-31
chr19	51942260	51942837	89	5.8449	0.797501	7.32902	2.31833e-13	5.17931e-12
chr6	1268641	1269021	28.75	5.84207	1.25775	4.64485	3.40325e-06	1.71486e-05
chr8	82339470	82340129	59.25	5.841	0.953693	6.12462	9.09005e-10	9.75139e-09
chr6	41416960	41418012	403	5.84099	0.468478	12.468	1.1158e-35	4.50108e-33
chr6	40364158	40364714	134.5	5.8371	0.699518	8.34446	7.15406e-17	3.04083e-15
chr21	36391684	36392416	89.75	5.83617	0.823883	7.08374	1.40312e-12	2.65006e-11
chr6	106319416	106319869	58.5	5.83318	0.944158	6.17819	6.48427e-10	7.18681e-09
chr8	137546619	137547411	266.25	5.82757	0.534693	10.8989	1.16659e-27	2.20722e-25
chr19	46385040	46386847	457	5.82281	0.450643	12.9211	3.42155e-38	1.78421e-35
chr2	16606713	16607516	279.75	5.82196	0.522678	11.1387	8.13016e-29	1.73823e-26
chr13	73773050	73773500	117.75	5.81853	0.727958	7.99295	1.31749e-15	4.48533e-14
chr15	77429751	77430344	88.75	5.8133	0.833165	6.97736	3.00768e-12	5.35869e-11
chr21	34785070	34786075	179.25	5.81304	1.36445	4.26034	2.04114e-05	8.61591e-05
chr11	102063367	102063792	87	5.81236	0.798722	7.27708	3.41135e-13	7.36839e-12
chr1	12246538	12247110	87.25	5.81064	0.806256	7.20694	5.72224e-13	1.18204e-11
chr11	71412254	71413536	262.75	5.81015	0.531155	10.9387	7.52691e-28	1.44978e-25
chr13	22316195	22316600	57.25	5.80178	0.946395	6.1304	8.76579e-10	9.42719e-09
chr15	66335555	66336215	202.5	5.79868	0.578098	10.0306	1.11809e-23	1.32071e-21
chr8	134440990	134441634	71.75	5.79769	0.865402	6.69942	2.09247e-11	3.11974e-10
chr14	22846617	22846954	57.75	5.79285	0.967266	5.98889	2.11279e-09	2.11477e-08
chr18	19601509	19602089	100.5	5.79245	0.755626	7.66577	1.77766e-14	5.05402e-13
chr3	58828082	58828544	42.5	5.78797	1.07512	5.38357	7.30247e-08	5.30322e-07
chr15	55771663	55772578	322	5.78609	0.559437	10.3427	4.51656e-25	6.4376e-23
chr13	97329100	97329762	114.25	5.78524	0.713865	8.10412	5.31299e-16	1.93183e-14
chr13	27530423	27531237	272.75	5.78478	0.524351	11.0323	2.67075e-28	5.43815e-26
chr4	18108215	18108687	85.75	5.78427	0.809236	7.14782	8.81699e-13	1.74949e-11
chrX	109849038	109849723	56.75	5.77572	0.960841	6.01111	1.84262e-09	1.86884e-08
chr2	11494505	11495041	72	5.77555	0.896534	6.44208	1.17845e-10	1.5096e-09
chr5	162110212	162110792	85.25	5.77053	0.816571	7.06678	1.58574e-12	2.96875e-11
chr11	46295186	46296247	368.75	5.76143	0.488529	11.7934	4.22039e-32	1.14218e-29
chr22	42716520	42717203	55.75	5.76105	0.951345	6.05569	1.39819e-09	1.44622e-08
chr9	126985312	126986140	239.75	5.76067	0.54192	10.6301	2.15868e-26	3.6629e-24
chr15	41533782	41534435	211.5	5.76	0.567838	10.1437	3.53336e-24	4.41774e-22
chr7	4476171	4476471	27.25	5.75966	1.26777	4.54314	5.54228e-06	2.66278e-05
chr9	97027767	97028475	168.5	5.7546	0.61649	9.33445	1.01514e-20	7.83526e-19
chrX	9364976	9365431	41.25	5.75298	1.07174	5.36788	7.96681e-08	5.72925e-07
chr11	1124470	1125130	84	5.75027	0.816241	7.04482	1.857e-12	3.43448e-11
chr6	43894043	43895976	1670.5	5.74735	0.357541	16.0747	3.84008e-58	6.84174e-55
chr13	69923777	69924321	55.75	5.74562	0.966994	5.94174	2.82014e-09	2.74941e-08
chr17	4513145	4513964	139.25	5.74246	0.662621	8.66628	4.46464e-18	2.35689e-16
chr6	43791722	43792336	111.25	5.74219	0.722494	7.94774	1.8994e-15	6.28626e-14
chrX	34271702	34272052	26.75	5.73484	1.26916	4.51862	6.22431e-06	2.95134e-05
chr22	20378528	20379082	26.75	5.73432	1.26945	4.51716	6.26746e-06	2.96916e-05
chr10	6095700	6096493	251	5.73223	0.557899	10.2747	9.16555e-25	1.24025e-22
chr8	82172065	82173184	359.5	5.73043	0.474102	12.0869	1.23872e-33	3.9528e-31
chr3	174156203	174156926	110	5.72925	0.71787	7.98091	1.45263e-15	4.87555e-14
chr4	14220299	14220738	54.5	5.72799	0.953815	6.00535	1.90922e-09	1.92999e-08
chr6	44079408	44080022	220.5	5.7266	0.555914	10.3012	6.95679e-25	9.59589e-23
chr19	42238228	42239897	845	5.72605	0.402477	14.227	6.22707e-46	4.43783e-43
chr12	53306632	53307667	192.75	5.72488	0.584515	9.79424	1.1919e-22	1.30682e-20
chr22	25906701	25907409	206.5	5.72482	0.569698	10.0489	9.29415e-24	1.11011e-21
chr11	125406442	125407074	40.5	5.72352	1.07625	5.31803	1.04894e-07	7.36014e-07
chr4	86791644	86792274	109.75	5.72318	0.722336	7.92315	2.31574e-15	7.53585e-14
chr3	101573401	101574225	222.75	5.71954	0.600386	9.52643	1.62782e-21	1.4441e-19
chr18	9502869	9503538	123.25	5.71953	0.690039	8.28871	1.14486e-16	4.67119e-15
chr18	8717558	8718567	237.25	5.71748	1.09309	5.23058	1.68978e-07	1.13252e-06
chr11	1712228	1712978	205.25	5.71661	0.568646	10.053	8.90887e-24	1.07007e-21
chr16	88554261	88555263	219.75	5.71456	0.571095	10.0063	1.42972e-23	1.67035e-21
chr2	8596994	8598321	289.25	5.71429	0.532488	10.7313	7.25691e-27	1.3183e-24
chr20	23192650	23193476	179	5.71236	0.625263	9.13594	6.48425e-20	4.54536e-18
chr3	66531225	66532128	95.25	5.70948	0.766874	7.44514	9.68409e-14	2.34332e-12
chr9	104077826	104078337	95.75	5.70912	0.777804	7.34006	2.13505e-13	4.79994e-12
chr20	15574856	15575370	136	5.70638	0.667067	8.55443	1.18453e-17	5.76886e-16
chr2	43389877	43391003	381.75	5.70578	0.474808	12.017	2.89172e-33	8.96015e-31
chr14	65766512	65766963	94.25	5.6998	0.759504	7.50463	6.16024e-14	1.55497e-12
chr10	126211446	126211797	54.25	5.69166	0.984153	5.78331	7.32445e-09	6.58246e-08
chr17	39982604	39983178	295.75	5.68867	0.502871	11.3124	1.13942e-29	2.59159e-27
chr2	47536812	47538172	646	5.68841	0.409298	13.898	6.5162e-44	4.35364e-41
chr6	47427872	47428482	204.25	5.68705	0.614042	9.26167	2.01259e-20	1.4889e-18
chr21	15068868	15069430	80	5.67998	0.819552	6.93059	4.19089e-12	7.30246e-11
chr20	42980654	42981368	79.75	5.67651	0.818389	6.9362	4.02775e-12	7.0354e-11
chr16	10456183	10456580	39.5	5.6725	1.09136	5.19762	2.01853e-07	1.33157e-06
chr16	52522749	52523091	39.5	5.67169	1.09203	5.1937	2.06155e-07	1.35743e-06
chr18	22118379	22118924	66.25	5.66882	0.888091	6.38315	1.73483e-10	2.16146e-09
chr9	104089249	104090379	265.75	5.66868	0.526505	10.7666	4.94797e-27	9.11962e-25
chr11	22306452	22306892	39.25	5.66823	1.08807	5.20943	1.89417e-07	1.2569e-06
chr11	117054648	117055372	79.25	5.66803	0.818058	6.92864	4.24918e-12	7.39199e-11
chr12	14364677	14365171	159.25	5.66712	0.629585	9.00137	2.22925e-19	1.43127e-17
chr14	44110120	44110368	25.75	5.663	1.28395	4.41063	1.03072e-05	4.67276e-05
chr20	14960071	14960664	105.25	5.65892	0.730523	7.7464	9.45332e-15	2.79934e-13
chr17	70409066	70409982	529	5.65837	0.441057	12.8291	1.12639e-37	5.35162e-35
chr6	26257438	26257828	39	5.65119	1.09521	5.15993	2.4704e-07	1.60101e-06
chr17	46638375	46639065	144	5.64902	0.648206	8.71485	2.91148e-18	1.5719e-16
chr11	15691993	15692766	143.75	5.6485	0.644649	8.76213	1.9159e-18	1.07795e-16
chr11	71359746	71360089	25.25	5.64685	1.27964	4.41283	1.02027e-05	4.62934e-05
chr9	72085287	72085869	157.75	5.64552	0.644612	8.758	1.9874e-18	1.11232e-16
chr2	117885972	117886323	39.25	5.64486	1.10706	5.09897	3.4151e-07	2.14939e-06
chr17	39890434	39891325	439.75	5.64288	0.528784	10.6714	1.38486e-26	2.38776e-24
chr8	76190553	76191232	91.25	5.64223	0.777188	7.2598	3.87664e-13	8.30487e-12
chr11	30762430	30763332	91	5.63817	0.777497	7.2517	4.11581e-13	8.73843e-12
chr21	37536475	37537316	90.25	5.63548	0.76465	7.37	1.70622e-13	3.91826e-12
chr1	3276060	3276702	116.25	5.63524	0.692592	8.13644	4.07058e-16	1.51355e-14
chr14	68444015	68444816	183.25	5.6345	0.620281	9.08378	1.04869e-19	7.16323e-18
chr13	27542805	27543588	144.5	5.63364	0.683853	8.23808	1.7499e-16	6.92831e-15
chr15	26873104	26873738	116.75	5.63274	0.706702	7.97046	1.58084e-15	5.26453e-14
chr19	44183666	44184060	103.75	5.6324	0.740232	7.60897	2.7629e-14	7.61222e-13
chr18	10408827	10409339	90.75	5.63071	0.78264	7.19451	6.26871e-13	1.28009e-11
chr11	1243806	1244645	141.5	5.62692	0.64303	8.75063	2.12163e-18	1.18126e-16
chr1	183962036	183962839	296.25	5.62523	0.499869	11.2534	2.2279e-29	4.91056e-27
chr11	68882378	68882725	78	5.62144	0.849763	6.6153	3.70789e-11	5.26043e-10
chr13	67804418	67804678	38	5.6183	1.09439	5.13372	2.84065e-07	1.81618e-06
chr3	42463075	42464297	166.75	5.61134	0.625031	8.9777	2.76481e-19	1.73858e-17
chr6	43810409	43811269	241.75	5.60908	0.528963	10.6039	2.85806e-26	4.73684e-24
chr1	24715669	24716461	218	5.60647	0.579899	9.66802	4.12285e-22	4.00105e-20
chr15	92114970	92115695	88.5	5.60528	0.768655	7.29233	3.0464e-13	6.6802e-12
chr11	75077861	75078930	176.75	5.59661	0.593004	9.43772	3.80965e-21	3.15698e-19
chr11	46273662	46274595	126	5.59619	0.670118	8.35106	6.76511e-17	2.88598e-15
chrX	77324480	77324803	37.75	5.59467	1.10667	5.05542	4.29438e-07	2.64365e-06
chr13	108748386	108748936	125.75	5.59275	0.67121	8.33234	7.92616e-17	3.34904e-15
chr1	213746279	213746702	75	5.5909	0.818715	6.82888	8.55815e-12	1.39037e-10
chr7	47231342	47231965	49.75	5.59008	0.968943	5.76926	7.96207e-09	7.09316e-08
chr3	181446177	181446658	100.25	5.58765	0.734732	7.60502	2.84867e-14	7.83844e-13
chr11	68098821	68099366	87.25	5.58273	0.772471	7.2271	4.9341e-13	1.03019e-11
chr6	52474766	52475399	137.5	5.57877	0.656376	8.49934	1.90671e-17	9.03891e-16
chr13	113651030	113652148	200.25	5.57769	0.578613	9.63975	5.43199e-22	5.13876e-20
chr2	74656586	74657407	111.75	5.57451	0.700643	7.95627	1.77299e-15	5.8861e-14
chr3	148933906	148934402	99	5.5728	0.73029	7.63095	2.33029e-14	6.54686e-13
chr3	167694765	167695372	212.25	5.57131	0.5731	9.72137	2.44481e-22	2.53738e-20
chr17	48707696	48708317	198.5	5.56648	0.57567	9.66956	4.06107e-22	3.96464e-20
chr11	129214242	129214931	37	5.56528	1.10933	5.01679	5.25423e-07	3.17421e-06
chr4	66042108	66042898	98.75	5.56234	0.74105	7.50603	6.09479e-14	1.54392e-12
chr1	87569843	87570363	123.5	5.55593	0.690535	8.04584	8.5655e-16	3.01201e-14
chr18	10140803	10141978	259.5	5.55467	0.540175	10.2831	8.39977e-25	1.14387e-22
chr11	75054111	75055173	135	5.55373	0.654394	8.48684	2.12329e-17	1.00212e-15
chr18	12008081	12009221	159.25	5.55356	0.60942	9.11286	8.0235e-20	5.55154e-18
chr17	37897730	37898124	318.75	5.55281	0.483487	11.4849	1.57078e-30	3.81628e-28
chr11	86219655	86220544	110	5.55101	0.702565	7.90107	2.76524e-15	8.91716e-14
chr4	57107679	57108181	85.25	5.55052	0.772042	7.1894	6.50778e-13	1.32133e-11
chr1	59350875	59351452	149	5.55032	0.669824	8.28624	1.16881e-16	4.75078e-15
chr2	38512025	38512544	97.75	5.54966	0.738483	7.51495	5.69333e-14	1.45602e-12
chr12	98967897	98968602	61	5.54924	0.895442	6.19721	5.74729e-10	6.44685e-09
chr11	76673879	76675348	330.75	5.54873	0.48568	11.4247	3.14914e-30	7.565e-28
chr9	112969244	112970955	476.75	5.5485	0.431195	12.8677	6.8378e-38	3.39982e-35
chr1	2068544	2069455	170.5	5.54546	0.592088	9.36594	7.53765e-21	5.9687e-19
chr13	67857756	67858247	121	5.53654	0.673849	8.2163	2.09879e-16	8.20333e-15
chr4	69598391	69599231	218	5.53651	0.542452	10.2065	1.85528e-24	2.40399e-22
chr7	24008904	24009597	108.75	5.53471	0.702766	7.8756	3.39106e-15	1.07728e-13
chrX	11314158	11314675	48	5.53006	0.980971	5.63733	1.72708e-08	1.42962e-07
chrX	103987061	103987506	60	5.52949	0.891944	6.19936	5.66916e-10	6.3659e-09
chr19	50070912	50071876	386.75	5.52947	0.462025	11.9679	5.23382e-33	1.57604e-30
chr3	151869983	151870523	60.25	5.52919	0.899066	6.14993	7.75189e-10	8.44727e-09
chr13	44942219	44943566	386	5.52841	0.457131	12.0937	1.14021e-33	3.69359e-31
chr15	35965231	35965959	120	5.52267	0.677501	8.15153	3.59342e-16	1.35498e-14
chr8	85202169	85203408	361.25	5.5218	0.476765	11.5818	5.09679e-31	1.28199e-28
chr1	110306287	110307014	145	5.52145	0.651957	8.46904	2.47424e-17	1.14501e-15
chr3	159500768	159501150	83.5	5.51754	0.777749	7.09424	1.3006e-12	2.48275e-11
chr11	46302805	46303407	131.75	5.5174	0.657369	8.39315	4.73284e-17	2.08206e-15
chr1	190308598	190309690	418.5	5.51586	0.445405	12.3839	3.19381e-35	1.24152e-32
chr5	2802836	2803587	119.25	5.5147	0.67586	8.15952	3.36349e-16	1.27729e-14
chr6	41471695	41472242	47.25	5.51391	0.975736	5.65102	1.59495e-08	1.33047e-07
chr22	49941596	49942690	119.5	5.51283	0.684326	8.05585	7.8931e-16	2.79395e-14
chr11	30542977	30543693	178.75	5.51259	0.580596	9.49472	2.20809e-21	1.91907e-19
chr8	121786908	121787974	238.25	5.50839	0.533151	10.3318	5.06234e-25	7.16773e-23
chr7	69673444	69674090	143.25	5.50672	0.647169	8.50894	1.75536e-17	8.41473e-16
chr4	96097711	96098241	59.5	5.50202	0.910777	6.04102	1.53142e-09	1.57564e-08
chr12	13887623	13888150	94.5	5.49944	0.742503	7.40662	1.29561e-13	3.05404e-12
chr4	40543215	40543727	82.5	5.49913	0.779978	7.05036	1.78452e-12	3.30615e-11
chr16	9754651	9755435	94.25	5.49401	0.745146	7.37306	1.66752e-13	3.84176e-12
chr13	26552142	26552862	118.25	5.49373	0.691542	7.94416	1.95506e-15	6.46046e-14
chr6	168674441	168675492	106.75	5.4926	0.728724	7.53729	4.79829e-14	1.2526e-12
chrX	113960382	113961062	71.25	5.4903	0.857234	6.40466	1.50704e-10	1.90316e-09
chr4	69524316	69524893	70.5	5.48766	0.84162	6.52035	7.01416e-11	9.39616e-10
chr14	90138996	90140567	327.75	5.48492	0.474975	11.5478	7.571e-31	1.88219e-28
chr7	156401348	156402173	175.75	5.484	0.589662	9.30024	1.40129e-20	1.05492e-18
chr7	156459111	156460112	269.5	5.482	0.515953	10.625	2.28016e-26	3.83856e-24
chr2	43482273	43483048	128.5	5.4812	0.658491	8.32389	8.5122e-17	3.58956e-15
chr18	10798750	10799259	152.25	5.47958	0.628471	8.7189	2.80907e-18	1.52819e-16
chr6	138825241	138825775	82.75	5.47769	0.816408	6.70951	1.95283e-11	2.94232e-10
chr15	97862334	97862936	198.25	5.47536	0.568502	9.6312	5.90365e-22	5.53597e-20
chr5	1105682	1106365	93	5.47508	0.745339	7.34575	2.04607e-13	4.61933e-12
chr6	36063716	36064266	105	5.47497	0.71943	7.61015	2.73772e-14	7.55258e-13
chr17	27466946	27467699	569	5.47027	0.418448	13.0728	4.71275e-39	2.58355e-36
chr15	102003405	102004194	151.75	5.46492	0.647531	8.43963	3.18331e-17	1.44807e-15
chr15	32312362	32312960	45.75	5.46435	0.981967	5.5647	2.62609e-08	2.08875e-07
chr13	113244408	113244797	57.5	5.46283	0.90172	6.05823	1.37627e-09	1.4263e-08
chr6	25153937	25154786	126.75	5.46168	0.658468	8.29451	1.09031e-16	4.47426e-15
chr1	113981635	113982209	68.75	5.46036	0.831493	6.56694	5.1361e-11	7.05253e-10
chr3	40128946	40129522	92.5	5.45778	0.760327	7.17821	7.06312e-13	1.42462e-11
chr2	65048661	65049203	80	5.45268	0.784832	6.94758	3.71594e-12	6.51738e-11
chr3	181898280	181898933	160	5.44989	0.601197	9.06507	1.24524e-19	8.42506e-18
chr6	30080686	30081381	103.75	5.44889	0.734272	7.42081	1.16404e-13	2.7714e-12
chr17	79951935	79953299	125.5	5.44878	0.656186	8.30372	1.00902e-16	4.1808e-15
chr3	76169218	76169812	114.25	5.44811	0.685909	7.94291	1.97493e-15	6.50602e-14
chr13	51556169	51556753	56.75	5.44683	0.899295	6.05677	1.3888e-09	1.43789e-08
chr11	70473236	70473696	45.5	5.44569	0.993548	5.48105	4.22797e-08	3.21802e-07
chr12	11168128	11168880	79.75	5.4393	0.79786	6.81736	9.2728e-12	1.49174e-10
chr14	81580544	81581188	45.75	5.436	1.01072	5.37832	7.51823e-08	5.44327e-07
chr17	59331662	59332054	33.75	5.43487	1.1182	4.86036	1.17171e-06	6.55106e-06
chr6	43244543	43246783	408.25	5.43483	0.453762	11.9773	4.67448e-33	1.42772e-30
chr17	29784387	29784899	113.5	5.43386	0.69443	7.82493	5.07951e-15	1.57157e-13
chr1	23028149	23029533	237.5	5.43314	0.52526	10.3437	4.46844e-25	6.41175e-23
chr8	124923990	124924481	137.75	5.43263	0.680569	7.98248	1.43418e-15	4.8212e-14
chr19	51978244	51978895	136.5	5.43135	0.659321	8.23779	1.75426e-16	6.93274e-15
chr18	19821682	19822832	135.5	5.42703	0.647764	8.3781	5.3789e-17	2.34696e-15
chr17	79957793	79959266	322.25	5.42701	0.557681	9.73139	2.21554e-22	2.32197e-20
chr7	69928316	69928920	112.75	5.42212	0.69845	7.76307	8.28983e-15	2.47192e-13
chr19	33894240	33895194	168.75	5.42156	0.59824	9.06251	1.27483e-19	8.59808e-18
chr14	44841835	44842779	101.75	5.42065	0.735477	7.37025	1.70303e-13	3.91742e-12
chr1	222773328	222774111	246.25	5.41964	0.513749	10.5492	5.12248e-26	8.05284e-24
chr3	134756651	134757250	78	5.41769	0.784104	6.9094	4.86703e-12	8.38494e-11
chr4	124857464	124858177	123.75	5.41761	0.676546	8.00776	1.16821e-15	4.00905e-14
chr16	7805255	7806165	79.5	5.41755	0.822304	6.58826	4.45008e-11	6.18613e-10
chr2	121223554	121224184	90	5.4152	0.7665	7.06484	1.60802e-12	3.00257e-11
chr19	54690966	54691325	33.5	5.41391	1.12745	4.80192	1.57154e-06	8.52998e-06
chr3	168059719	168060461	79.25	5.41224	0.823576	6.57163	4.97669e-11	6.85136e-10
chr6	135572578	135573065	55.25	5.40751	0.902316	5.99292	2.06107e-09	2.06687e-08
chr10	7728308	7728887	122.75	5.40571	0.677181	7.98267	1.43196e-15	4.8212e-14
chr10	34502139	34502792	99.5	5.40368	0.71133	7.59658	3.04053e-14	8.29164e-13
chr9	79200858	79201987	155.25	5.40268	0.609398	8.86559	7.6099e-19	4.49447e-17
chrX	99976244	99976772	66.75	5.39693	0.861117	6.26735	3.67232e-10	4.28572e-09
chr10	6313610	6314292	144.25	5.39445	0.643868	8.3782	5.3745e-17	2.34696e-15
chr8	137041808	137042319	88	5.39231	0.75298	7.1613	7.99166e-13	1.59608e-11
chr1	155042140	155042804	246.25	5.39178	0.578873	9.31427	1.22794e-20	9.34284e-19
chr10	77536387	77536730	32.75	5.38876	1.12398	4.79435	1.63203e-06	8.82915e-06
chr8	99626621	99627355	121	5.38873	0.670902	8.03207	9.58389e-16	3.3481e-14
chr8	121823180	121823715	76.5	5.38642	0.790049	6.81783	9.24237e-12	1.48797e-10
chr11	117090645	117091112	77	5.38615	0.803684	6.70182	2.05844e-11	3.07973e-10
chr13	26562555	26563221	110.75	5.38548	0.71758	7.50506	6.14004e-14	1.5517e-12
chr7	69197212	69197652	54.5	5.38318	0.908972	5.92227	3.17529e-09	3.06768e-08
chr20	52132236	52132591	32.75	5.38057	1.13068	4.75873	1.94818e-06	1.03381e-05
chr6	866006	866536	54.5	5.38026	0.912455	5.89646	3.7138e-09	3.54469e-08
chr11	27423015	27423958	272.25	5.37674	0.501082	10.7303	7.33762e-27	1.3183e-24
chr14	71583288	71583985	97.5	5.37395	0.712926	7.53789	4.77642e-14	1.24841e-12
chr3	108339009	108339676	97.75	5.37066	0.7245	7.41293	1.23541e-13	2.93152e-12
chr6	149498252	149498788	98.5	5.36926	0.744391	7.21295	5.4752e-13	1.1354e-11
chr8	121821507	121822500	227.5	5.36871	1.16958	4.59029	4.42641e-06	2.17455e-05
chr2	174102930	174103575	129.5	5.36597	0.64075	8.37452	5.54481e-17	2.40832e-15
chr19	15733776	15734335	75.5	5.36581	0.793229	6.76452	1.33752e-11	2.09037e-10
chr11	129400139	129400752	107.75	5.365	0.685611	7.82514	5.07102e-15	1.57128e-13
chr14	55773576	55774092	97.25	5.3644	0.72285	7.42117	1.16089e-13	2.76698e-12
chr20	17908721	17910107	282.5	5.36127	0.526132	10.19	2.19794e-24	2.8139e-22
chr11	57959551	57960160	97	5.35891	0.72591	7.38233	1.55544e-13	3.61078e-12
chr22	22901291	22901802	64.5	5.35856	0.849035	6.31136	2.76597e-10	3.32414e-09
chr21	42528018	42528864	118	5.35703	0.663362	8.07557	6.71627e-16	2.40526e-14
chr5	35608927	35609741	204.5	5.35599	0.556322	9.6275	6.11978e-22	5.71358e-20
chr14	20885889	20887354	237.5	5.35568	0.542154	9.87851	5.15921e-23	5.80547e-21
chr14	54568707	54569308	75	5.35565	0.794467	6.74119	1.57091e-11	2.4076e-10
chr16	302517	303121	86.25	5.3551	0.766834	6.98339	2.88136e-12	5.15078e-11
chr3	156838268	156838662	65.25	5.3537	0.876251	6.10979	9.97654e-10	1.06224e-08
chr12	50281620	50283216	407.75	5.35369	0.449596	11.9078	1.07816e-32	3.11501e-30
chr21	44027650	44028094	32	5.35304	1.12861	4.74303	2.10547e-06	1.10984e-05
chr3	167808894	167810100	267.25	5.35026	0.50007	10.699	1.02865e-26	1.81756e-24
chr2	115512414	115513156	43	5.34951	1.01404	5.27546	1.32426e-07	9.09523e-07
chr13	24317283	24318351	591.25	5.34676	0.442572	12.0811	1.32896e-33	4.17841e-31
chrX	131502093	131502673	64.5	5.34405	0.868087	6.15613	7.45458e-10	8.13989e-09
chr4	175547448	175548017	63.5	5.34096	0.843525	6.33172	2.42448e-10	2.94854e-09
chr18	19773533	19774601	180.5	5.34024	0.568597	9.39196	5.88959e-21	4.71608e-19
chr9	78522277	78523275	96.5	5.33959	0.745511	7.16233	7.93171e-13	1.58634e-11
chr1	18261820	18263064	190.75	5.33904	0.553772	9.64123	5.35436e-22	5.08783e-20
chr6	43774051	43774447	116.5	5.33663	0.667342	7.99685	1.27645e-15	4.35951e-14
chr10	96436230	96436640	53	5.33615	0.91937	5.80414	6.46982e-09	5.88616e-08
chr17	68235351	68236091	169.25	5.33613	0.578087	9.23068	2.6892e-20	1.96901e-18
chr17	71183298	71183930	118.25	5.33585	0.706725	7.55011	4.34888e-14	1.15216e-12
chr3	103100107	103100646	73.75	5.33392	0.791772	6.73669	1.62034e-11	2.4745e-10
chr1	27442269	27442859	42.5	5.33331	1.01454	5.2569	1.46504e-07	9.93736e-07
chr8	33901098	33901889	200.5	5.33242	0.544732	9.78907	1.25443e-22	1.36836e-20
chr1	245421639	245421984	42.25	5.33227	1.00755	5.29231	1.2078e-07	8.36847e-07
chr17	70395604	70396188	84.25	5.33166	0.751779	7.09206	1.32133e-12	2.51559e-11
chr21	45845309	45845831	31.5	5.32859	1.13191	4.7076	2.50648e-06	1.29943e-05
chr19	41665931	41666165	52.5	5.32619	0.915757	5.81616	6.02155e-09	5.51116e-08
chr4	159076686	159077444	200.25	5.32265	0.563319	9.44872	3.43007e-21	2.86464e-19
chr15	81097290	81097795	147.25	5.32263	0.6179	8.61406	7.0516e-18	3.56414e-16
chr13	24881096	24881787	52.75	5.32191	0.928529	5.73155	9.95179e-09	8.66324e-08
chr1	181420826	181421644	119.75	5.31887	1.36751	3.88946	0.000100468	0.000358241
chr19	38431648	38433101	305.25	5.31844	0.503205	10.5691	4.1428e-26	6.62561e-24
chr4	134917676	134918320	125	5.31366	0.644097	8.24977	1.58696e-16	6.30655e-15
chr3	118432258	118432868	83.25	5.3128	0.75498	7.037	1.96417e-12	3.61083e-11
chr6	43663066	43664022	467.25	5.31064	0.511916	10.374	3.2548e-25	4.90053e-23
chr19	34297097	34297831	83	5.30964	0.753263	7.04885	1.80402e-12	3.33939e-11
chr6	46154342	46154786	72.5	5.30578	0.797918	6.64954	2.94012e-11	4.26747e-10
chr13	32654377	32654858	93.25	5.30531	0.722159	7.34645	2.03533e-13	4.59994e-12
chr4	99668653	99669371	52	5.30363	0.926955	5.72156	1.0555e-08	9.12887e-08
chr12	5817527	5818039	104	5.30166	0.708416	7.48382	7.21925e-14	1.79265e-12
chr7	23418531	23419087	146.5	5.30138	0.64575	8.20964	2.21853e-16	8.65552e-15
chr20	43039879	43040342	63	5.30079	0.88186	6.01092	1.84477e-09	1.87013e-08
chr2	78034844	78035470	118	5.29879	1.36873	3.87132	0.000108247	0.000382404
chr7	117130134	117130420	31	5.29756	1.14033	4.64563	3.39047e-06	1.70923e-05
chr11	74178155	74178944	123.5	5.29404	0.648641	8.16175	3.30197e-16	1.25616e-14
chr12	5848979	5849490	113	5.29215	0.669129	7.90902	2.59432e-15	8.40402e-14
chr6	41008123	41009315	250	5.2885	0.565523	9.35152	8.63995e-21	6.76638e-19
chr3	108523727	108524641	123.25	5.28531	0.659847	8.0099	1.14804e-15	3.94616e-14
chr12	70332438	70333042	51.75	5.28523	0.94075	5.6181	1.93064e-08	1.58392e-07
chr22	29204450	29205213	224.5	5.28299	0.520665	10.1466	3.43014e-24	4.3139e-22
chr12	105711717	105712305	62.25	5.28258	0.883958	5.97606	2.28601e-09	2.26798e-08
chr18	8341592	8342639	257.75	5.27977	0.545305	9.68224	3.5878e-22	3.55126e-20
chr16	85470339	85471450	143.5	5.27898	0.631399	8.36077	6.2309e-17	2.68582e-15
chr17	38072743	38073264	41	5.27892	1.02076	5.17155	2.32161e-07	1.51237e-06
chr11	128294742	128295768	112	5.27708	0.673555	7.83468	4.70041e-15	1.46708e-13
chr17	63584252	63585212	305.5	5.27658	0.482032	10.9465	6.90394e-28	1.34188e-25
chr19	51857415	51858574	183.5	5.27638	0.569284	9.26844	1.88894e-20	1.41704e-18
chr13	74025533	74026111	132	5.26988	0.639148	8.24516	1.6494e-16	6.54252e-15
chr13	99068545	99069007	132	5.26824	0.642392	8.20097	2.38451e-16	9.25242e-15
chr15	39303338	39303767	50.5	5.26795	0.921669	5.71566	1.09277e-08	9.42832e-08
chr5	144923478	144924068	192.5	5.26795	0.558023	9.44038	3.71418e-21	3.08985e-19
chr19	50836484	50837637	142.5	5.26772	0.63387	8.31042	9.53662e-17	3.96679e-15
chr7	114775762	114776441	90.75	5.26495	0.725259	7.2594	3.88806e-13	8.31267e-12
chr11	121321748	121322773	383.5	5.26484	0.448206	11.7465	7.36342e-32	1.94358e-29
chr1	15555713	15556816	152.5	5.26466	0.622156	8.46195	2.62945e-17	1.20898e-15
chr14	95805762	95806216	90.75	5.26259	0.729222	7.21673	5.32543e-13	1.10649e-11
chr2	20395772	20397245	215	5.26206	0.588705	8.93837	3.9496e-19	2.4335e-17
chr1	231369340	231370166	130.75	5.26105	0.629497	8.35755	6.40357e-17	2.7547e-15
chr16	4464411	4464794	40	5.26003	1.00612	5.22803	1.7133e-07	1.14678e-06
chr4	54194833	54195510	51	5.25735	0.949913	5.53455	3.12025e-08	2.43916e-07
chr6	33020609	33021395	91.25	5.25672	0.751711	6.993	2.69064e-12	4.83411e-11
chr20	17702258	17703092	130.25	5.25521	0.6302	8.33895	7.49557e-17	3.17967e-15
chr2	84921431	84921932	80.25	5.25471	0.764979	6.86909	6.46147e-12	1.08691e-10
chr12	113364087	113364920	281.25	5.25433	0.497943	10.5521	4.96873e-26	7.869e-24
chr17	79250719	79251603	120.25	5.25345	0.653376	8.04047	8.94964e-16	3.13678e-14
chr1	3310139	3310510	30	5.25091	1.14376	4.59094	4.41249e-06	2.16822e-05
chr13	47181777	47182467	329.5	5.24938	0.465276	11.2823	1.60511e-29	3.57471e-27
chr13	77383142	77383865	121	5.24927	0.67812	7.74091	9.87108e-15	2.91497e-13
chr5	122577754	122578321	59.75	5.24752	0.855415	6.13446	8.5447e-10	9.2219e-09
chr9	130752874	130753767	109.5	5.24626	0.670943	7.81924	5.31435e-15	1.63248e-13
chr3	11651699	11652393	79.5	5.24467	0.759895	6.90183	5.13369e-12	8.80885e-11
chr19	54978782	54979709	230.25	5.24422	0.540708	9.69881	3.05027e-22	3.09075e-20
chr6	43491954	43492748	328.5	5.24373	0.468794	11.1856	4.79797e-29	1.03617e-26
chr9	108080920	108082200	242	5.24146	0.565712	9.26523	1.9465e-20	1.45004e-18
chr11	97444534	97445355	270.75	5.24114	0.530776	9.87449	5.3703e-23	6.01136e-21
chr1	157210306	157210869	139.25	5.23944	0.624072	8.39557	4.63643e-17	2.04385e-15
chr1	27297407	27297793	79	5.23222	0.765517	6.83488	8.20709e-12	1.3415e-10
chr18	8882617	8883492	158.5	5.23064	0.602096	8.68739	3.70871e-18	1.97736e-16
chr13	80298014	80298927	257.5	5.23059	0.517149	10.1143	4.77441e-24	5.89529e-22
chr17	10681184	10681638	59.25	5.22839	0.865396	6.04161	1.52582e-09	1.57138e-08
chr22	45486266	45486682	49	5.22838	0.919471	5.68629	1.29825e-08	1.10189e-07
chr16	52598712	52599311	69	5.22785	0.810513	6.45006	1.11807e-10	1.44089e-09
chr6	64793810	64794646	266	5.22512	0.505983	10.3267	5.33837e-25	7.50883e-23
chr17	46677602	46679334	206.25	5.22455	0.536214	9.74341	1.96845e-22	2.07318e-20
chrX	120615242	120615870	119.75	5.22288	0.699231	7.46946	8.05233e-14	1.97884e-12
chr9	87257428	87257939	88.25	5.22218	0.730604	7.14775	8.82108e-13	1.74949e-11
chr2	43226503	43227675	277.5	5.22024	0.535585	9.7468	1.90368e-22	2.01489e-20
chr6	143856080	143856738	68.5	5.21887	0.808748	6.45302	1.09644e-10	1.41472e-09
chr8	8629901	8630473	117.25	5.21877	0.650464	8.02316	1.03057e-15	3.56531e-14
chr19	39544119	39544969	137	5.21776	0.620529	8.40855	4.15096e-17	1.84891e-15
chr11	3592957	3593301	29.25	5.21429	1.14691	4.54638	5.45777e-06	2.6269e-05
chr17	27438690	27439258	451	5.21071	1.14935	4.53363	5.79787e-06	2.77002e-05
chr17	77976349	77976743	59.25	5.20869	0.891133	5.84502	5.06518e-09	4.71585e-08
chr3	178577684	178578304	109.5	5.20808	1.36863	3.80533	0.000141614	0.00048552
chr14	90983672	90984425	116.5	5.20688	0.655757	7.94025	2.01767e-15	6.63659e-14
chr11	129482079	129482593	68	5.2061	0.812411	6.40821	1.47238e-10	1.8649e-09
chr12	94576810	94577999	126.5	5.20547	0.645929	8.05889	7.69907e-16	2.74343e-14
chr17	27025269	27025921	77.5	5.20195	0.770622	6.75033	1.47511e-11	2.28204e-10
chr22	23044503	23045272	87.25	5.19983	0.740999	7.01732	2.26171e-12	4.10138e-11
chr15	69846611	69847287	135	5.19664	0.620493	8.37501	5.52207e-17	2.40452e-15
chr1	246873161	246873537	58	5.19591	0.869239	5.97753	2.26541e-09	2.24858e-08
chr17	25930956	25931759	86.5	5.19493	0.728637	7.12966	1.00619e-12	1.97543e-11
chr2	219129419	219129861	38.25	5.19216	1.01407	5.12011	3.05359e-07	1.94245e-06
chr17	40636204	40636774	77	5.19211	0.771757	6.72765	1.72427e-11	2.61639e-10
chr11	34951195	34951814	115.25	5.19175	0.655125	7.92483	2.28458e-15	7.44579e-14
chr1	184406421	184407006	96.75	5.19127	0.721829	7.19183	6.39309e-13	1.303e-11
chr18	49965737	49966157	47.75	5.18904	0.924139	5.615	1.96565e-08	1.61203e-07
chr11	111230812	111231489	145.25	5.18277	0.646455	8.01722	1.08163e-15	3.72988e-14
chr17	55484597	55485466	182	5.18263	0.567961	9.12499	7.17435e-20	4.99634e-18
chr6	140445613	140446039	76.25	5.18005	0.768984	6.73622	1.62559e-11	2.47897e-10
chr11	75034496	75035209	76.5	5.17657	0.781722	6.622	3.5436e-11	5.05082e-10
chr3	184276925	184277585	270.25	5.17654	0.54874	9.43349	3.96657e-21	3.26174e-19
chr10	14592313	14592888	95	5.17574	0.703479	7.35735	1.87591e-13	4.27125e-12
chr22	29334134	29334573	85.25	5.17165	0.733113	7.05437	1.73386e-12	3.22909e-11
chr17	19575205	19576090	293.75	5.17122	0.47911	10.7934	3.69864e-27	6.87626e-25
chr13	59026240	59026807	94.75	5.16936	0.708169	7.29962	2.88583e-13	6.35418e-12
chr6	2515109	2515912	260.25	5.16893	0.566964	9.11686	7.73344e-20	5.36821e-18
chr12	54526662	54527093	28.75	5.16868	1.16589	4.43327	9.28162e-06	4.24579e-05
chr6	82557523	82558067	66.25	5.16827	0.814316	6.34676	2.19903e-10	2.70514e-09
chr20	55839018	55839815	331.5	5.16779	0.47134	10.964	5.69017e-28	1.13697e-25
chr11	116713612	116714201	47.5	5.16527	0.94397	5.47185	4.45352e-08	3.37168e-07
chr11	75132937	75133759	216.25	5.16162	0.519685	9.93222	3.01461e-23	3.46518e-21
chr1	182218296	182218790	131.75	5.16098	0.621781	8.30032	1.03833e-16	4.2856e-15
chr21	43734591	43735988	179.5	5.16015	0.573747	8.99377	2.389e-19	1.52468e-17
chr6	138857104	138857570	47	5.15895	0.934228	5.52216	3.34864e-08	2.60626e-07
chr6	1601178	1601838	37.5	5.15842	1.02145	5.05011	4.41557e-07	2.70856e-06
chr1	5826296	5827630	103.25	5.15581	0.683134	7.5473	4.44374e-14	1.17148e-12
chr17	25591108	25591953	113.25	5.15571	0.676281	7.62362	2.46658e-14	6.86659e-13
chr8	56838482	56839266	486.5	5.15482	0.412858	12.4857	8.93705e-36	3.82148e-33
chr21	39899378	39900208	179	5.1548	0.576786	8.93711	3.99473e-19	2.45423e-17
chr20	10691821	10692200	56.75	5.14992	0.890011	5.78636	7.19293e-09	6.47515e-08
chr17	80641911	80642898	131	5.14828	0.631135	8.15718	3.42933e-16	1.29998e-14
chr15	65570855	65571367	93.75	5.14679	0.721342	7.13502	9.67714e-13	1.90689e-11
chr6	66817524	66818032	47.25	5.14555	0.958594	5.36781	7.96992e-08	5.72955e-07
chr11	69838720	69839961	1175	5.14495	0.371839	13.8365	1.5351e-43	9.94558e-41
chr7	99600990	99601913	177.75	5.14494	0.576178	8.92942	4.28253e-19	2.62351e-17
chr22	33776948	33778089	122.25	5.14303	0.672257	7.65038	2.00384e-14	5.68197e-13
chr11	76799214	76800182	272.75	5.14267	0.535172	9.60937	7.29967e-22	6.75615e-20
chr8	34371982	34372832	74.25	5.14232	0.769321	6.68423	2.32148e-11	3.42771e-10
chr7	20343807	20344498	196.5	5.1405	0.569782	9.02187	1.84914e-19	1.20166e-17
chr9	140392046	140393220	204.25	5.14032	0.534797	9.61171	7.13534e-22	6.63277e-20
chr1	53581481	53582004	46.25	5.13819	0.932651	5.50924	3.60394e-08	2.78167e-07
chr4	38134706	38135219	93.75	5.13491	0.741746	6.92273	4.43013e-12	7.67554e-11
chr11	93345061	93345377	74	5.13259	0.77722	6.60378	4.00796e-11	5.64122e-10
chr19	54023592	54024524	73.75	5.13208	0.770431	6.66131	2.71394e-11	3.9661e-10
chr21	16512691	16513303	130.5	5.13002	0.656949	7.80885	5.7711e-15	1.76015e-13
chr14	23290252	23291784	166	5.12928	0.574622	8.92635	4.40281e-19	2.68182e-17
chr10	77164062	77165474	167.25	5.12427	0.610146	8.39843	4.52487e-17	1.99879e-15
chr6	47468584	47469084	92.25	5.12281	0.723169	7.08383	1.40219e-12	2.65006e-11
chr22	25761391	25762117	230	5.12267	0.525352	9.75093	1.82781e-22	1.94421e-20
chr21	34784136	34784785	119.25	5.11898	0.649618	7.87998	3.27431e-15	1.04485e-13
chr4	159216241	159216645	37.25	5.11623	1.05508	4.84914	1.23997e-06	6.88587e-06
chr5	16521062	16522635	165	5.11354	0.590668	8.65721	4.83468e-18	2.53347e-16
chr7	112212699	112213486	146	5.11209	0.602486	8.48499	2.15734e-17	1.01595e-15
chr8	8729416	8730300	118.75	5.11132	0.652887	7.82879	4.92582e-15	1.52851e-13
chr4	70698239	70698811	112.75	5.11078	1.43892	3.55182	0.000382578	0.00117421
chr3	71098003	71098496	91.5	5.11042	0.724549	7.05324	1.74801e-12	3.24978e-11
chrX	41932597	41933041	27	5.10616	1.15061	4.43778	9.08921e-06	4.16565e-05
chr17	16200050	16202316	498	5.10412	0.41692	12.2425	1.84367e-34	6.35769e-32
chr1	56959911	56960418	81.75	5.10171	0.75079	6.79513	1.08219e-11	1.72023e-10
chr4	89889078	89889624	109	5.10153	0.675264	7.55487	4.1927e-14	1.11492e-12
chr10	63783975	63784450	99.5	5.10147	0.685927	7.43733	1.02739e-13	2.4764e-12
chr9	25802703	25803599	91.75	5.10024	0.748639	6.81268	9.57964e-12	1.53763e-10
chr6	104937508	104937749	9.25	5.09939	1.64841	3.09353	0.00197792	0.00501756
chr3	170048866	170049317	82	5.09879	0.762773	6.68455	2.31643e-11	3.42262e-10
chr6	168064702	168065122	45	5.0982	0.935542	5.44946	5.05223e-08	3.77945e-07
chr9	130877319	130878168	244.75	5.09793	0.522293	9.76067	1.66063e-22	1.79314e-20
chr18	10035398	10035989	55.25	5.09784	0.909379	5.60585	2.0724e-08	1.68728e-07
chrX	102356521	102357462	90.25	5.09455	0.71803	7.09517	1.2919e-12	2.47055e-11
chr2	28604014	28604693	155	5.09342	0.62831	8.10654	5.2081e-16	1.90341e-14
chrX	39950995	39951674	54.25	5.09017	0.886517	5.74176	9.36963e-09	8.21701e-08
chr5	126339377	126340184	162.75	5.08923	0.600711	8.47201	2.41198e-17	1.11884e-15
chr16	73288914	73289460	101.25	5.08883	1.38229	3.68147	0.000231898	0.000754408
chr9	86953815	86954094	63.25	5.08809	0.836595	6.0819	1.18766e-09	1.24949e-08
chr1	54762913	54765111	286.75	5.08786	0.480313	10.5928	3.21815e-26	5.29262e-24
chr11	85511038	85512263	178.75	5.08518	0.551581	9.21928	2.99094e-20	2.16767e-18
chr6	47488000	47488404	81.25	5.08167	0.769497	6.60388	4.00526e-11	5.64113e-10
chr17	37906109	37906910	544.25	5.08152	0.411376	12.3525	4.72249e-35	1.74081e-32
chr14	44897492	44898196	89.5	5.07613	0.729543	6.95796	3.4523e-12	6.08492e-11
chr11	86210707	86211228	133.25	5.07601	0.610481	8.31477	9.19291e-17	3.84627e-15
chr10	122756058	122756615	88.75	5.07177	0.716082	7.08267	1.414e-12	2.66825e-11
chr13	108806554	108807344	355.25	5.07151	0.462743	10.9597	5.97269e-28	1.18237e-25
chr2	8749554	8750074	106.25	5.06869	0.66799	7.58797	3.24954e-14	8.81664e-13
chr6	41495587	41496129	97.25	5.06816	0.687074	7.37644	1.62572e-13	3.76168e-12
chr4	82386962	82387587	109	5.06469	0.742087	6.82492	8.79756e-12	1.4271e-10
chr22	29281831	29282248	88.5	5.06461	0.721688	7.01772	2.25518e-12	4.0965e-11
chr10	24123018	24123568	88.5	5.06173	0.726769	6.9647	3.291e-12	5.81981e-11
chr1	228918388	228919156	132.5	5.05973	0.627983	8.05712	7.81101e-16	2.76948e-14
chr13	86086467	86087050	124.5	5.05708	0.667703	7.57385	3.62319e-14	9.73164e-13
chrX	99510457	99511142	63.25	5.05312	0.885261	5.70805	1.14276e-08	9.81999e-08
chr6	43242760	43243399	104.75	5.0502	0.66426	7.60274	2.89917e-14	7.95459e-13
chr14	74411775	74412354	62.5	5.04999	0.866898	5.82536	5.69911e-09	5.24299e-08
chr6	34530455	34532090	306.25	5.04997	0.477813	10.5689	4.15263e-26	6.62561e-24
chr14	93186119	93186863	168.25	5.04769	0.616379	8.18926	2.62841e-16	1.01619e-14
chr1	108709943	108710606	61	5.0474	0.821849	6.14151	8.17406e-10	8.85316e-09
chr5	141545696	141546248	105.5	5.04571	0.692618	7.28498	3.21716e-13	6.99725e-12
chr11	2548032	2548743	106	5.04419	0.707971	7.12485	1.04195e-12	2.04187e-11
chr11	39511340	39512045	313.75	5.04346	0.476418	10.5862	3.45339e-26	5.63615e-24
chr4	107694695	107695761	113.75	5.04198	0.668031	7.54752	4.43614e-14	1.17092e-12
chr16	83029294	83030004	61.25	5.04052	0.840364	5.99802	1.99734e-09	2.00862e-08
chr21	35365502	35366046	62	5.03763	0.86851	5.80032	6.61896e-09	6.00906e-08
chr19	39309776	39310364	100	5.03671	1.40298	3.59	0.000330674	0.00103329
chr2	235864591	235865207	95	5.03436	0.687683	7.32076	2.46578e-13	5.48578e-12
chr14	100611384	100612306	176.25	5.03359	1.17058	4.30009	1.7073e-05	7.35337e-05
chr2	125365238	125365675	60.5	5.03247	0.826868	6.08619	1.15629e-09	1.22066e-08
chr7	26041234	26041907	206.75	5.03072	0.522284	9.63216	5.84881e-22	5.5087e-20
chr2	10151477	10153560	215.25	5.0291	0.517913	9.71032	2.72475e-22	2.81426e-20
chr17	39823161	39823572	266.75	5.02903	0.483574	10.3997	2.48639e-25	3.77015e-23
chr8	58703922	58704496	176	5.02783	1.17393	4.28292	1.84458e-05	7.89375e-05
chr1	239376110	239376655	132.25	5.02759	0.687162	7.31646	2.54605e-13	5.65259e-12
chr19	13137217	13137796	127	5.02479	1.46248	3.43581	0.00059078	0.00172978
chr19	41679980	41680499	77.25	5.02305	0.748008	6.71524	1.87758e-11	2.83694e-10
chr11	106332659	106333312	163	5.02284	0.568391	8.83695	9.83682e-19	5.73055e-17
chr8	86235732	86236551	248.25	5.02211	0.491226	10.2236	1.55408e-24	2.02599e-22
chrX	40589054	40589757	51.5	5.02188	0.881277	5.69841	1.20933e-08	1.03339e-07
chr10	105596702	105597122	51.5	5.02188	0.881277	5.69841	1.20933e-08	1.03339e-07
chr2	242465300	242465975	96	5.02154	0.738127	6.80309	1.02402e-11	1.63629e-10
chr22	33724682	33725888	147.75	5.02064	0.636349	7.88976	3.02775e-15	9.73433e-14
chr14	27461552	27462227	113.5	5.01908	0.705717	7.11203	1.14352e-12	2.21053e-11
chr17	80613417	80613830	51.75	5.01412	0.900589	5.5676	2.58268e-08	2.06036e-07
chr12	121416137	121416667	52.25	5.01229	0.920167	5.44716	5.11811e-08	3.82739e-07
chr10	71177749	71178184	61.25	5.00833	0.885454	5.65622	1.5474e-08	1.29688e-07
chr2	10368786	10369361	83.25	5.00736	1.41581	3.53674	0.000405096	0.0012364
chr2	212874727	212875758	144.75	5.0066	0.602485	8.30992	9.57687e-17	3.97579e-15
chr9	71346610	71347725	241	5.00594	0.559723	8.94361	3.76648e-19	2.33667e-17
chr21	40899703	40900531	93.25	5.00571	0.691565	7.23824	4.54536e-13	9.54615e-12
chr10	102060749	102061545	102.25	5.00528	0.68435	7.31391	2.59478e-13	5.7548e-12
chr16	1217288	1218070	51.25	5.00167	0.899272	5.56191	2.66845e-08	2.11537e-07
chr13	52659085	52659403	60.5	4.99991	0.873503	5.72398	1.0406e-08	9.01457e-08
chr21	45345046	45345434	42.25	4.99874	0.951242	5.25496	1.48055e-07	1.00235e-06
chr4	121166006	121166592	76	4.99823	0.750838	6.65687	2.7972e-11	4.07942e-10
chr4	16130800	16131395	43	4.99545	0.983464	5.07944	3.7854e-07	2.35747e-06
chr19	54955744	54956307	76	4.99545	0.755569	6.61151	3.80425e-11	5.38285e-10
chr15	62427711	62428540	230.25	4.99433	0.560033	8.91791	4.75167e-19	2.87793e-17
chr11	68065145	68067045	436.5	4.99418	0.418397	11.9365	7.64146e-33	2.238e-30
chr21	42347915	42348834	109.5	4.99405	0.654511	7.63021	2.34373e-14	6.57598e-13
chr1	168115626	168116422	243.75	4.99369	0.496111	10.0657	7.8355e-24	9.51835e-22
chr8	67107734	67108282	75.75	4.9933	0.751277	6.64642	3.00317e-11	4.34718e-10
chr9	112171338	112172004	143.75	4.99155	0.613724	8.13321	4.18071e-16	1.54643e-14
chr19	42965720	42966207	50.75	4.99075	0.895729	5.57171	2.52245e-08	2.01682e-07
chr18	13862665	13863273	123.75	4.9889	1.46519	3.40495	0.000661771	0.0019081
chr14	92372620	92373138	68.5	4.98822	0.832022	5.9953	2.03114e-09	2.03891e-08
chr6	34499473	34500264	84	4.98333	0.734035	6.78896	1.12946e-11	1.7874e-10
chr11	86711141	86711794	167	4.98332	0.559412	8.90815	5.18928e-19	3.11648e-17
chr4	78185054	78185636	68.25	4.98249	0.832904	5.98207	2.20318e-09	2.19395e-08
chr1	87458496	87459413	218.75	4.98061	0.550629	9.0453	1.49258e-19	9.94123e-18
chr9	92931674	92932192	109	4.9801	0.669362	7.44008	1.00626e-13	2.43093e-12
chr11	1052984	1055084	209	4.97981	0.534783	9.31183	1.25643e-20	9.52573e-19
chr1	68624492	68624841	59	4.97912	0.853413	5.83437	5.39949e-09	4.99958e-08
chr7	74389978	74390377	33.5	4.97851	1.05085	4.7376	2.16267e-06	1.1369e-05
chr19	24070443	24071139	59.75	4.97753	0.880413	5.65363	1.57091e-08	1.31452e-07
chr2	75166954	75167831	108.75	4.9766	0.669768	7.43034	1.08319e-13	2.59627e-12
chr22	19922519	19923367	92.5	4.97636	0.724483	6.86884	6.4724e-12	1.08789e-10
chr7	103028792	103029628	157.75	4.97575	0.567424	8.76902	1.80221e-18	1.01934e-16
chr8	8959519	8960692	226.5	4.97508	0.548505	9.07024	1.18752e-19	8.06007e-18
chr12	87853807	87854794	116.75	4.97507	0.646834	7.69142	1.45507e-14	4.18701e-13
chr17	72660380	72661139	117.75	4.97415	0.673565	7.38481	1.52676e-13	3.54806e-12
chr11	65621239	65622559	199	4.97393	0.52534	9.46802	2.852e-21	2.41967e-19
chr7	94609976	94610485	58.25	4.97378	0.835088	5.95599	2.58496e-09	2.53748e-08
chr7	105537987	105538957	200	4.97319	0.546259	9.10408	8.69998e-20	5.98089e-18
chr7	3221100	3221533	42.25	4.97302	0.981675	5.06585	4.06581e-07	2.51379e-06
chr6	157503823	157504426	99.5	4.9725	0.672029	7.39923	1.36974e-13	3.22167e-12
chr7	73706862	73707572	186	4.97167	0.613054	8.10969	5.07506e-16	1.85796e-14
chr17	60265946	60266609	151	4.97154	1.50881	3.29501	0.000984195	0.00271439
chr8	53302609	53303907	173.75	4.97037	0.549581	9.04393	1.51139e-19	1.00353e-17
chr2	16635931	16636289	83.5	4.96968	0.743079	6.68796	2.26303e-11	3.34835e-10
chr1	180126784	180127494	148.25	4.96401	0.578184	8.58552	9.04246e-18	4.517e-16
chr2	30029375	30029646	33.5	4.96284	1.06677	4.6522	3.28405e-06	1.66027e-05
chr18	11005547	11005944	142.75	4.96056	0.65821	7.53643	4.83004e-14	1.25934e-12
chr20	12429146	12429988	58	4.96004	0.846412	5.86008	4.62645e-09	4.34593e-08
chr8	9638735	9639302	98.5	4.95786	0.67232	7.37426	1.65266e-13	3.81164e-12
chr1	214223856	214224681	173.5	4.95538	0.581189	8.52627	1.51144e-17	7.29448e-16
chr20	17691391	17691798	41.75	4.9545	0.984322	5.03342	4.81818e-07	2.9315e-06
chr22	42241860	42242360	99	4.95416	0.69366	7.14206	9.19403e-13	1.81671e-11
chr4	155511660	155512165	58.25	4.95357	0.864376	5.7308	9.99567e-09	8.69699e-08
chr11	68178907	68179446	106.5	4.95326	0.65624	7.54794	4.42186e-14	1.17004e-12
chr17	46037510	46038256	124	4.95305	0.651493	7.60262	2.90205e-14	7.95459e-13
chr4	94763557	94764227	147.25	4.95274	0.581648	8.51502	1.66568e-17	8.00276e-16
chr11	66118290	66119369	90.5	4.95259	0.710907	6.96658	3.24743e-12	5.74752e-11
chr8	129568657	129569240	303	4.95081	0.477904	10.3594	3.79277e-25	5.55407e-23
chr7	111603174	111603580	32.75	4.94956	1.04941	4.71654	2.39885e-06	1.24939e-05
chr17	69325387	69326343	607.75	4.94924	0.433285	11.4226	3.22484e-30	7.61154e-28
chr11	19093850	19094510	301.5	4.94878	0.462027	10.711	9.03745e-27	1.61017e-24
chr11	91036960	91037344	74.5	4.94508	0.792108	6.24294	4.29425e-10	4.93608e-09
chr8	95972147	95972726	65.5	4.94414	0.803026	6.15688	7.41904e-10	8.10522e-09
chr17	11080664	11081107	49	4.94277	0.894771	5.52406	3.31257e-08	2.58006e-07
chr12	127831281	127831702	57.5	4.94242	0.854405	5.78464	7.26696e-09	6.53629e-08
chr8	85201136	85201613	106.25	4.94231	0.671546	7.3596	1.84457e-13	4.20436e-12
chr18	19130495	19131000	49.25	4.94221	0.904949	5.46132	4.72617e-08	3.55669e-07
chr5	137304273	137304894	50	4.94158	0.932859	5.29724	1.17564e-07	8.16618e-07
chr6	41485314	41486380	495.25	4.94129	0.417288	11.8415	2.3827e-32	6.61587e-30
chr4	75592973	75593729	299.75	4.94026	0.461985	10.6935	1.09114e-26	1.91218e-24
chr1	18971026	18972172	90.25	4.93806	0.730216	6.76246	1.3567e-11	2.1157e-10
chr4	52775432	52775730	48.75	4.9378	0.891884	5.53637	3.08807e-08	2.41842e-07
chr12	12556412	12557084	123.25	4.93537	0.669775	7.3687	1.72305e-13	3.94843e-12
chr2	219309169	219309788	115.75	4.93126	1.45506	3.38903	0.000701396	0.00201098
chr6	43214634	43215438	177	4.92698	0.54811	8.98904	2.49408e-19	1.58701e-17
chr17	46043423	46044092	289.5	4.92617	0.475343	10.3634	3.63807e-25	5.36427e-23
chr13	44513282	44513714	73.25	4.92329	0.788645	6.24273	4.30001e-10	4.94005e-09
chr7	21403448	21404032	176.25	4.9222	0.54453	9.03935	1.57603e-19	1.03999e-17
chr11	74862020	74862753	113.75	4.92	1.4504	3.39218	0.0006934	0.00198912
chr3	124330236	124330713	72	4.91674	0.758879	6.47895	9.23632e-11	1.20704e-09
chr17	58247437	58248115	114.5	4.91653	0.707379	6.95035	3.64376e-12	6.40654e-11
chr1	215809059	215809894	57.25	4.91474	0.884937	5.55377	2.79571e-08	2.20562e-07
chr19	54931445	54932321	80.25	4.91208	0.745012	6.59329	4.30189e-11	6.00748e-10
chr22	41792983	41793762	104	4.91074	0.673189	7.29475	2.99219e-13	6.56807e-12
chr20	536599	537636	127.25	4.9067	0.617717	7.94328	1.96897e-15	6.49638e-14
chr6	38943400	38943774	32.5	4.90621	1.08295	4.5304	5.88707e-06	2.80887e-05
chr3	197551105	197551443	31.75	4.90571	1.05175	4.66431	3.09651e-06	1.57557e-05
chr19	38629727	38630231	57	4.90551	0.889262	5.51639	3.46038e-08	2.68346e-07
chr16	10451029	10451580	87.25	4.90417	0.703603	6.97009	3.16748e-12	5.61532e-11
chr11	85541886	85542616	158.5	4.90301	0.570312	8.59707	8.17771e-18	4.10421e-16
chr1	1059220	1061149	474	4.90277	0.412875	11.8747	1.60187e-32	4.5063e-30
chr22	26832780	26833323	87.5	4.90273	0.714014	6.86643	6.58271e-12	1.10124e-10
chr7	16861567	16862223	143.5	4.90207	0.612425	8.00436	1.2009e-15	4.10804e-14
chr19	16199201	16200864	339.25	4.90141	0.444103	11.0367	2.54334e-28	5.22852e-26
chr11	71191641	71193074	190.75	4.90058	0.555707	8.81864	1.15858e-18	6.73112e-17
chr19	52192060	52192537	40.25	4.89969	0.990036	4.949	7.45939e-07	4.36339e-06
chr9	116916157	116916493	57.25	4.89767	0.908164	5.39294	6.9316e-08	5.06485e-07
chr11	105073563	105074074	86.75	4.8955	0.70445	6.94939	3.66873e-12	6.44515e-11
chr6	109617284	109618173	174.5	4.89303	0.581071	8.4207	3.74254e-17	1.681e-15
chr3	193819452	193820008	63	4.89293	0.797061	6.13872	8.31882e-10	9.00538e-09
chr6	41006800	41007338	173	4.89279	0.550448	8.88875	6.18011e-19	3.68052e-17
chr11	75497461	75497854	71.25	4.8927	0.77441	6.31798	2.6501e-10	3.19386e-09
chr20	18084200	18084514	47.75	4.89256	0.913935	5.35329	8.63682e-08	6.17576e-07
chr19	45511465	45512254	118	4.89199	0.62923	7.77457	7.57059e-15	2.26693e-13
chr19	46367332	46367635	31.5	4.88871	1.0584	4.61894	3.85696e-06	1.92129e-05
chr6	148028516	148029230	219.25	4.88746	0.509022	9.60168	7.86554e-22	7.2485e-20
chr20	62655484	62655892	47.5	4.88547	0.913704	5.34688	8.94827e-08	6.37441e-07
chr15	96795360	96795877	102	4.88383	0.671181	7.27647	3.4267e-13	7.39281e-12
chr11	67713780	67714126	56.5	4.88261	0.903794	5.40235	6.5774e-08	4.83025e-07
chr8	25642457	25643178	149	4.88194	0.593744	8.2223	1.99638e-16	7.83168e-15
chr19	10561376	10562586	117.25	4.88125	0.632562	7.71663	1.19442e-14	3.47911e-13
chr16	68113626	68114198	55.25	4.87936	0.86484	5.64192	1.68164e-08	1.39625e-07
chr12	14371897	14373045	228.25	4.87794	0.549896	8.87065	7.27231e-19	4.30698e-17
chr17	63623966	63624787	140.25	4.87659	0.594666	8.20055	2.39286e-16	9.268e-15
chr12	69726163	69727158	200.5	4.87596	1.57537	3.09512	0.00196731	0.00499574
chr3	105014998	105015498	48	4.87574	0.944965	5.15971	2.47337e-07	1.60245e-06
chr20	31060907	31061808	132.25	4.87555	0.603246	8.0822	6.36086e-16	2.2818e-14
chr8	4195817	4196368	54.5	4.87315	0.845913	5.76082	8.37047e-09	7.41652e-08
chr22	23878276	23878680	103	4.8723	0.720623	6.76123	1.36824e-11	2.13214e-10
chrX	20983700	20984083	62.25	4.87225	0.803099	6.06681	1.30476e-09	1.35812e-08
chr6	41426981	41427790	156	4.87223	1.17151	4.15892	3.19754e-05	0.000128744
chr12	63033510	63034420	94.5	4.87187	0.723219	6.73638	1.62384e-11	2.47806e-10
chr18	19600328	19601020	93.75	4.87148	0.702512	6.93437	4.08027e-12	7.12132e-11
chr2	135723125	135723714	101	4.87098	0.668482	7.28663	3.1781e-13	6.92637e-12
chr1	24652553	24653250	85.25	4.86961	0.706184	6.89567	5.36125e-12	9.17723e-11
chr12	80643378	80644023	70.25	4.86946	0.779763	6.2448	4.24351e-10	4.88564e-09
chr10	69251827	69252656	87.25	4.8674	0.769677	6.32395	2.54968e-10	3.08501e-09
chrX	64416763	64417294	54.25	4.86604	0.846891	5.74577	9.15031e-09	8.04084e-08
chr1	48275459	48276087	69.5	4.86524	0.761075	6.39258	1.63109e-10	2.04413e-09
chr15	37204398	37205039	131.75	4.8648	0.615279	7.90666	2.6439e-15	8.53877e-14
chr11	13986598	13987339	108	4.86133	0.649958	7.47946	7.46293e-14	1.84673e-12
chr14	55593667	55594650	216	4.86103	0.52184	9.31517	1.21763e-20	9.29748e-19
chr10	105553438	105554505	192.25	4.86092	0.527075	9.22244	2.90408e-20	2.11188e-18
chr10	26805502	26806551	147.5	4.86039	0.609725	7.97145	1.56824e-15	5.23073e-14
chr19	38426672	38427339	217.5	4.85971	0.552212	8.80044	1.36285e-18	7.81174e-17
chr13	99300324	99300879	115.25	4.85917	0.62645	7.75668	8.71843e-15	2.58889e-13
chr16	14750364	14750849	100.25	4.85861	0.671834	7.23185	4.76443e-13	9.97684e-12
chr13	89356679	89357335	445.75	4.85838	0.429213	11.3193	1.05317e-29	2.42116e-27
chr9	84332449	84333167	200.25	4.85775	0.535493	9.07154	1.1735e-19	7.99028e-18
chr19	48774977	48775532	61.75	4.85669	0.809745	5.9978	2.00008e-09	2.01042e-08
chr8	118926693	118927442	161.75	4.85193	0.585174	8.29143	1.11891e-16	4.58283e-15
chr20	30814969	30816141	269	4.8518	0.502608	9.65325	4.76219e-22	4.56573e-20
chr11	30193013	30193901	138.25	4.85149	0.604623	8.02401	1.02352e-15	3.54665e-14
chr1	223952782	223953438	115.25	4.85149	0.643182	7.54295	4.59445e-14	1.20675e-12
chr1	105894146	105894528	46.25	4.85021	0.911419	5.32161	1.02854e-07	7.22476e-07
chr10	5237763	5238709	231.75	4.84689	0.555336	8.72785	2.59551e-18	1.42653e-16
chr21	40988211	40988752	135.25	4.84444	1.50952	3.20925	0.0013308	0.00354107
chr17	10640529	10641300	92.25	4.84105	0.716415	6.75733	1.40562e-11	2.18085e-10
chr1	219483281	219483969	107.25	4.84093	0.671492	7.20921	5.62785e-13	1.1648e-11
chr9	99153442	99154264	129	4.84056	0.600723	8.05789	7.76211e-16	2.75671e-14
chr3	51214290	51214985	98.75	4.84025	0.664984	7.27875	3.36939e-13	7.29125e-12
chr2	197374916	197375412	61	4.83959	0.809495	5.97853	2.25154e-09	2.23585e-08
chr13	97599004	97599579	99.25	4.83944	0.68141	7.1021	1.22872e-12	2.3603e-11
chr21	34789724	34790383	121.75	4.8391	0.625935	7.73099	1.06709e-14	3.13816e-13
chr4	87946601	87947125	114.25	4.83869	0.643642	7.51767	5.57596e-14	1.43286e-12
chr8	29614210	29615058	211.75	4.83732	0.506854	9.54382	1.37666e-21	1.23668e-19
chr22	23875796	23876345	98.5	4.83728	0.663582	7.28964	3.10789e-13	6.79415e-12
chr1	106175354	106175904	115.75	4.83704	0.685982	7.05126	1.77299e-12	3.28765e-11
chr8	137664880	137665590	106	4.8351	0.648395	7.45702	8.85026e-14	2.15757e-12
chr11	61542900	61543591	122.25	4.83441	0.649072	7.44819	9.46301e-14	2.29647e-12
chr6	40638936	40639485	106.5	4.83404	1.45466	3.32314	0.000890108	0.00248862
chr16	1149596	1150467	83.25	4.83361	0.709969	6.8082	9.88263e-12	1.5827e-10
chr3	181866119	181866623	116.25	4.83316	0.705711	6.84864	7.45555e-12	1.23279e-10
chr2	222400156	222401005	107	4.82939	0.687968	7.01979	2.22201e-12	4.05e-11
chr8	128719642	128720267	188.25	4.82735	0.5348	9.02646	1.77313e-19	1.16287e-17
chr10	4983698	4984276	107	4.82725	0.692217	6.9736	3.08926e-12	5.49488e-11
chr14	96705903	96706708	218	4.8245	0.513073	9.40315	5.29528e-21	4.2895e-19
chr11	102664539	102665121	173.25	4.82298	0.561196	8.5941	8.3919e-18	4.20185e-16
chr17	54963023	54964381	217.5	4.82286	0.508207	9.48995	2.31144e-21	2.00075e-19
chr7	51674156	51674823	136.75	4.822	0.635529	7.58737	3.26466e-14	8.84644e-13
chr7	99277446	99277927	68	4.82151	0.782735	6.15982	7.2826e-10	7.96838e-09
chr6	123131484	123132053	97.5	4.82087	0.667115	7.22643	4.95841e-13	1.03425e-11
chr1	231074657	231075200	90	4.81927	0.690117	6.98326	2.88409e-12	5.15136e-11
chr3	113292462	113293462	194	4.81703	0.520228	9.25946	2.05467e-20	1.51479e-18
chrX	129651371	129651885	45.25	4.8152	0.917701	5.24702	1.54576e-07	1.04286e-06
chr2	233928027	233928569	67.5	4.81489	0.776227	6.20294	5.5419e-10	6.23609e-09
chr17	39639638	39640724	143.75	4.81438	0.629424	7.64887	2.02759e-14	5.74171e-13
chr2	42418458	42419064	60	4.81367	0.813614	5.9164	3.29067e-09	3.16485e-08
chr22	29215349	29215952	82.25	4.81137	0.719299	6.68898	2.24739e-11	3.3275e-10
chr9	135502510	135502902	60.5	4.80972	0.838051	5.73917	9.51395e-09	8.32957e-08
chr1	226067402	226067987	104.25	4.80936	0.652031	7.37597	1.63153e-13	3.77104e-12
chr12	57540532	57541234	104.5	4.80919	0.659705	7.28991	3.10173e-13	6.78761e-12
chr3	188850019	188850930	163.25	4.80773	0.551776	8.71319	2.95432e-18	1.59101e-16
chr6	158760165	158760763	97	4.80696	0.680395	7.06496	1.60661e-12	3.00256e-11
chr8	102690364	102690854	37.25	4.8059	0.975735	4.92541	8.41818e-07	4.86433e-06
chr18	10122217	10122705	97.5	4.80249	0.703896	6.82273	8.93278e-12	1.44465e-10
chr8	108923935	108924955	192.75	4.80242	0.534365	8.98716	2.53704e-19	1.60479e-17
chrX	64383666	64384442	59.5	4.80185	0.813613	5.90188	3.59386e-09	3.43481e-08
chr19	15899270	15899996	66.75	4.79937	0.775623	6.18776	6.1024e-10	6.79882e-09
chr9	130866595	130867194	82	4.79834	0.735409	6.52473	6.81248e-11	9.17197e-10
chr2	208696344	208697389	133.25	4.79638	0.608536	7.88183	3.2261e-15	1.03132e-13
chr14	96601457	96602122	118.5	4.79511	0.636645	7.53185	5.00254e-14	1.29957e-12
chr3	65938922	65939528	170.25	4.79453	0.568783	8.42946	3.47277e-17	1.56641e-15
chr8	134619706	134620497	254.25	4.79372	0.555243	8.63355	5.94762e-18	3.05673e-16
chr4	11803170	11804041	81.75	4.79355	0.736191	6.51129	7.45076e-11	9.89424e-10
chr1	3207398	3207900	59.75	4.79209	0.838167	5.71734	1.08204e-08	9.33949e-08
chr16	7772742	7773070	29.5	4.79183	1.06773	4.48787	7.19395e-06	3.36852e-05
chr16	1271336	1271904	44.5	4.79092	0.919175	5.2122	1.86614e-07	1.24177e-06
chr4	129481974	129482707	117.75	4.78974	0.628159	7.62504	2.43952e-14	6.80011e-13
chr3	129906630	129907372	60.5	4.78903	0.869028	5.51079	3.57228e-08	2.76022e-07
chr8	37451724	37452750	214.75	4.78681	0.555672	8.61447	7.02688e-18	3.56007e-16
chr11	76760021	76760746	89.75	4.78592	0.745657	6.4184	1.37715e-10	1.74947e-09
chr19	42231655	42232156	88.75	4.78446	0.718666	6.65743	2.78665e-11	4.06679e-10
chr20	17836686	17837189	117	4.78305	0.622376	7.68514	1.52826e-14	4.39066e-13
chr10	122700114	122700364	38.25	4.78251	1.04416	4.58025	4.64414e-06	2.26953e-05
chr11	76456531	76457519	289.5	4.78194	0.543267	8.80219	1.34177e-18	7.73236e-17
chr13	71604913	71605392	66.5	4.78029	0.798696	5.98512	2.16237e-09	2.15917e-08
chr17	76147066	76148283	182.5	4.77803	0.545525	8.75859	1.97706e-18	1.10944e-16
chr18	19682852	19683492	73.25	4.77737	0.753258	6.34227	2.264e-10	2.77389e-09
chr21	33736664	33737128	80.75	4.77736	0.733595	6.51226	7.40278e-11	9.85501e-10
chr8	129564266	129564924	141.5	4.77717	0.660711	7.23035	4.81741e-13	1.00681e-11
chr22	39359579	39360391	198.5	4.77708	0.563418	8.47875	2.27631e-17	1.06727e-15
chr1	168929256	168930266	167.75	4.77647	0.559837	8.5319	1.43966e-17	6.96379e-16
chr3	177017689	177018414	87.75	4.77616	0.703373	6.79036	1.11851e-11	1.77385e-10
chr9	97029066	97029878	282.5	4.77439	0.460388	10.3704	3.38222e-25	5.02166e-23
chr6	93791689	93792320	66	4.77397	0.791432	6.03206	1.61884e-09	1.65999e-08
chr4	62406619	62407104	100.75	4.77378	1.45194	3.28786	0.00100951	0.00277317
chr8	65152590	65153278	44	4.77351	0.921511	5.18009	2.21783e-07	1.45095e-06
chr4	14071514	14072481	87.25	4.77251	0.694381	6.87305	6.28437e-12	1.06046e-10
chr11	2291313	2292950	225.25	4.77214	0.511036	9.33819	9.79994e-21	7.59141e-19
chr14	74196538	74196999	45	4.77159	0.964199	4.94875	7.46898e-07	4.3678e-06
chr8	101675776	101676304	87.25	4.77118	0.697031	6.84499	7.64787e-12	1.26069e-10
chr11	120223069	120223576	116	4.76777	0.628791	7.58244	3.39104e-14	9.15409e-13
chr2	233262988	233263552	87.25	4.76669	0.705827	6.75335	1.44473e-11	2.23829e-10
chr8	121072755	121073256	101.25	4.76495	0.656818	7.25459	4.02871e-13	8.57906e-12
chr12	115237362	115237831	73.5	4.76354	0.785722	6.06263	1.33916e-09	1.39122e-08
chr18	10181943	10182320	66	4.76324	0.809121	5.88693	3.93443e-09	3.7336e-08
chr20	25358885	25359655	101.75	4.76281	0.676186	7.04363	1.8729e-12	3.45792e-11
chr4	91104340	91104879	137	4.76247	0.587718	8.10333	5.34765e-16	1.94113e-14
chr10	112599997	112600479	65.75	4.75876	0.807658	5.89205	3.81426e-09	3.63084e-08
chr8	95220638	95221334	136.75	4.75843	0.591075	8.05047	8.24755e-16	2.90978e-14
chr14	68773533	68774108	94	4.75648	0.691019	6.88328	5.84889e-12	9.96409e-11
chr6	65099430	65100223	36	4.7558	0.979794	4.85388	1.2107e-06	6.74436e-06
chr7	70035744	70036732	173.25	4.754	0.571936	8.31212	9.40084e-17	3.91793e-15
chr7	22433509	22434258	136.25	4.75178	0.594276	7.99591	1.28619e-15	4.38576e-14
chr10	5062308	5062761	93.25	4.751	0.678727	6.99988	2.56189e-12	4.62222e-11
chr17	73765623	73766207	50.25	4.74968	0.860151	5.52191	3.35332e-08	2.60895e-07
chr1	191373444	191373912	64.75	4.7488	0.788111	6.02555	1.68533e-09	1.72157e-08
chr11	14908168	14908521	58.75	4.74831	0.868414	5.46779	4.55673e-08	3.4425e-07
chr12	32101686	32102096	72	4.74811	0.761635	6.2341	4.54386e-10	5.19507e-09
chr22	47084651	47085282	72	4.74788	0.762038	6.2305	4.64948e-10	5.31298e-09
chr8	115648903	115649576	86.25	4.74699	0.711947	6.66761	2.59996e-11	3.81779e-10
chr17	14603133	14603541	110	4.74628	0.720338	6.58897	4.42891e-11	6.16071e-10
chr6	108181289	108181957	86.5	4.7448	0.724084	6.55283	5.64561e-11	7.69299e-10
chr1	72948465	72949069	65.25	4.74267	0.816251	5.81031	6.23586e-09	5.68298e-08
chr2	60321496	60322336	100	4.7413	0.66888	7.08843	1.35644e-12	2.57381e-11
chr20	62635072	62635674	107	4.73941	0.653434	7.25309	4.07362e-13	8.66606e-12
chr20	3148835	3149313	43.75	4.73903	0.9563	4.95559	7.21118e-07	4.23209e-06
chr19	41677907	41678951	128.75	4.73856	0.626878	7.55899	4.06217e-14	1.08291e-12
chr6	43879443	43879785	71	4.73772	0.74442	6.3643	1.9618e-10	2.42867e-09
chr2	38517199	38518187	213.5	4.73391	0.537349	8.80974	1.25432e-18	7.26761e-17
chr14	23029827	23030554	128.25	4.73334	0.625917	7.56225	3.96159e-14	1.05741e-12
chr10	63596163	63596694	70.75	4.73167	0.746246	6.34063	2.28823e-10	2.79556e-09
chr12	108297413	108297790	21.5	4.72863	1.22001	3.87589	0.000106235	0.000376046
chr19	35871307	35871952	190	4.72837	0.522371	9.05176	1.40681e-19	9.39926e-18
chr10	115253758	115254132	35.75	4.72804	1.00168	4.72009	2.35738e-06	1.22869e-05
chr5	175281410	175282013	49.5	4.72661	0.863086	5.4764	4.34058e-08	3.29317e-07
chr17	39868090	39868713	274	4.72524	0.473789	9.97329	1.99509e-23	2.3182e-21
chr7	105575431	105576085	148.5	4.72497	0.591618	7.98651	1.38809e-15	4.69579e-14
chr12	7819073	7819491	28.25	4.72419	1.07779	4.3832	1.16947e-05	5.22864e-05
chr5	1809280	1810324	183	4.7238	0.541733	8.7198	2.78698e-18	1.52004e-16
chr11	65414539	65414944	28.75	4.72306	1.10284	4.28263	1.84697e-05	7.89921e-05
chr19	56198814	56200829	245.25	4.72245	0.484047	9.75617	1.7359e-22	1.865e-20
chr8	63527586	63528018	85.25	4.72128	0.729125	6.47526	9.46479e-11	1.23389e-09
chr8	128602654	128603299	308	4.7204	0.458052	10.3054	6.66279e-25	9.25002e-23
chr11	87056517	87057323	78.75	4.72003	0.772336	6.11137	9.87807e-10	1.05228e-08
chr22	29213919	29214850	112.75	4.71974	0.64408	7.32789	2.33812e-13	5.21806e-12
chr3	55602897	55603611	92.75	4.71956	0.725584	6.5045	7.79546e-11	1.03199e-09
chr2	108882654	108883108	50.5	4.71923	0.913748	5.16469	2.40832e-07	1.566e-06
chr12	59833891	59834472	98.25	4.71888	0.662396	7.12395	1.04876e-12	2.05334e-11
chr11	10996862	10997552	49.75	4.71868	0.885079	5.33136	9.7479e-08	6.88731e-07
chrX	117630204	117630670	63	4.71583	0.777896	6.06228	1.34204e-09	1.39353e-08
chr4	185269479	185270491	98.25	4.71424	0.672196	7.01319	2.32943e-12	4.21704e-11
chr9	38380991	38381669	161.5	4.71375	0.578532	8.14779	3.70649e-16	1.3854e-14
chr7	16921417	16921837	118.5	4.71337	0.609898	7.72812	1.09144e-14	3.19657e-13
chr8	26000378	26001318	174.5	4.71224	0.546244	8.62662	6.31931e-18	3.22451e-16
chrX	115488477	115488825	42	4.7121	0.917214	5.1374	2.78564e-07	1.78421e-06
chr11	63398865	63399373	71	4.71145	0.790694	5.95862	2.54371e-09	2.50344e-08
chr17	10647753	10649327	166.75	4.70946	0.542319	8.68392	3.82342e-18	2.03345e-16
chr3	42171821	42172426	139	4.70941	0.576454	8.16962	3.09355e-16	1.18465e-14
chr8	128615099	128616230	208.25	4.70914	0.504091	9.34184	9.46741e-21	7.36048e-19
chr7	138081075	138081580	104.75	4.70763	0.655705	7.17949	6.99702e-13	1.41395e-11
chr13	103552386	103553002	159.75	4.70536	0.559228	8.41404	3.96134e-17	1.76813e-15
chr6	36288146	36288824	270	4.70499	0.469353	10.0244	1.1908e-23	1.39887e-21
chr22	43510981	43511335	42.5	4.70491	0.948692	4.95936	7.07253e-07	4.15528e-06
chr8	134272646	134273606	225	4.70484	0.559603	8.40745	4.19006e-17	1.86244e-15
chr2	170249397	170250072	118.75	4.70474	0.636801	7.38809	1.48956e-13	3.46916e-12
chr20	55685316	55685904	35	4.70192	0.998307	4.70989	2.47848e-06	1.28585e-05
chr6	47372936	47373574	105.75	4.69954	0.701028	6.70379	2.03085e-11	3.04272e-10
chr6	43707305	43707726	69.25	4.6994	0.749237	6.27225	3.55864e-10	4.16213e-09
chr6	96252913	96253550	103.5	4.69753	0.639677	7.3436	2.07928e-13	4.6844e-12
chr4	107134549	107135135	48.75	4.69679	0.875547	5.3644	8.12169e-08	5.83082e-07
chr17	15251147	15251771	144.75	4.69429	0.575138	8.16203	3.29445e-16	1.25553e-14
chr15	45541289	45542090	138.5	4.69313	0.603622	7.77496	7.54742e-15	2.26317e-13
chr3	194443392	194444181	118.25	4.69082	0.654076	7.17169	7.40798e-13	1.48856e-11
chr2	231959356	231960185	103.25	4.68979	0.649058	7.22553	4.99134e-13	1.04011e-11
chr6	41578488	41578793	41.5	4.68931	0.925585	5.06632	4.05576e-07	2.50831e-06
chr20	16452660	16453145	96.5	4.68915	0.670362	6.99496	2.65331e-12	4.77506e-11
chr16	3057133	3057719	35.25	4.6889	1.025	4.57456	4.77228e-06	2.32895e-05
chr14	99782108	99783345	246.75	4.6886	0.48466	9.674	3.8889e-22	3.83155e-20
chr22	25530053	25530595	104.25	4.68829	0.682025	6.87407	6.2397e-12	1.05375e-10
chr15	62853167	62854011	185.25	4.68596	0.537193	8.72304	2.70819e-18	1.48091e-16
chr20	50108799	50109545	116.25	4.68344	0.614738	7.6186	2.56438e-14	7.11108e-13
chr10	9281201	9281751	95.75	4.68328	0.658805	7.10874	1.17103e-12	2.25963e-11
chr16	89896020	89896867	75.75	4.68326	0.738442	6.34208	2.26677e-10	2.77569e-09
chr1	168770653	168770999	82.5	4.68307	0.712066	6.57675	4.80852e-11	6.63694e-10
chr6	6897412	6897855	69.25	4.68301	0.77851	6.01535	1.79499e-09	1.82313e-08
chr6	45400702	45402007	294	4.68266	0.470567	9.95111	2.49391e-23	2.88215e-21
chr20	31055500	31056328	82.5	4.68206	0.714043	6.55712	5.48582e-11	7.50395e-10
chr12	124716349	124717191	170.25	4.68035	0.534723	8.75286	2.08012e-18	1.16118e-16
chr13	80435765	80436427	218.25	4.67986	1.30674	3.58133	0.00034185	0.00106433
chr6	128551755	128552124	34.25	4.67983	0.989176	4.73104	2.23374e-06	1.17167e-05
chr4	160725491	160726085	27.5	4.67929	1.08704	4.3046	1.67287e-05	7.21814e-05
chr8	118959793	118960397	137.75	4.67906	0.618271	7.56798	3.79084e-14	1.0131e-12
chr3	99794813	99795467	82	4.67856	0.70371	6.64841	2.96268e-11	4.29729e-10
chr10	134587714	134588391	35	4.67814	1.02625	4.55848	5.15251e-06	2.49287e-05
chr3	124305743	124306317	170.25	4.67771	0.542003	8.63041	6.11313e-18	3.13426e-16
chr12	18981471	18981977	61.5	4.67725	0.785286	5.95611	2.5831e-09	2.53683e-08
chr12	72913792	72914461	82.25	4.67612	0.717139	6.52052	7.00654e-11	9.39184e-10
chr13	110052539	110053556	102	4.67283	0.647562	7.21602	5.35303e-13	1.11114e-11
chr1	99340378	99340873	68.5	4.67202	0.770541	6.0633	1.3336e-09	1.38704e-08
chr2	57198419	57199050	88.25	4.67166	0.678404	6.88625	5.72809e-12	9.77386e-11
chr15	41224901	41225994	155.75	4.67028	0.55393	8.43118	3.42203e-17	1.54678e-15
chr3	167720538	167721110	68	4.66987	0.755609	6.18027	6.39929e-10	7.09631e-09
chr8	126370754	126371442	185.25	4.66903	0.581877	8.02408	1.02289e-15	3.54665e-14
chrX	14551961	14552402	55	4.66887	0.848273	5.50397	3.71333e-08	2.85682e-07
chr13	71600373	71600800	56	4.66862	0.886782	5.26468	1.40435e-07	9.58038e-07
chr6	1076806	1077731	169.25	4.66834	0.544031	8.58101	9.40423e-18	4.66502e-16
chr11	1244955	1246018	81.5	4.66721	0.708761	6.58503	4.54798e-11	6.30582e-10
chr2	88998188	88998774	94.75	4.66435	0.666839	6.99473	2.65771e-12	4.77897e-11
chr7	46552531	46552860	61.25	4.66138	0.802448	5.80896	6.28628e-09	5.72405e-08
chr8	29348047	29348364	34	4.66011	1.00092	4.65581	3.22705e-06	1.63532e-05
chr7	84654386	84655008	235.75	4.65992	0.497577	9.36522	7.58896e-21	5.98716e-19
chr1	193279591	193280077	74.5	4.6591	0.739038	6.30428	2.89527e-10	3.45622e-09
chr4	38425945	38426550	80.75	4.65689	0.702821	6.626	3.44915e-11	4.92934e-10
chr2	62796552	62798240	208.5	4.65634	0.518095	8.98743	2.53068e-19	1.60479e-17
chr2	40642620	40643194	81	4.65601	0.71341	6.52641	6.73656e-11	9.07546e-10
chr12	101006304	101006890	81	4.65434	0.716688	6.49423	8.34596e-11	1.1001e-09
chr11	23811478	23812166	128.25	4.65312	0.61963	7.50951	5.93488e-14	1.50519e-12
chr8	60304428	60304998	88.25	4.65206	0.718019	6.47903	9.23155e-11	1.20704e-09
chr18	8960938	8961350	74.5	4.65145	0.753258	6.17511	6.61177e-10	7.30163e-09
chr3	151689444	151690022	74.75	4.65056	0.763608	6.09024	1.12741e-09	1.19326e-08
chr14	65409186	65409935	194.5	4.6487	0.537494	8.64885	5.20196e-18	2.70603e-16
chr15	42304518	42304983	55.5	4.64853	0.89772	5.17816	2.2409e-07	1.46336e-06
chr19	39810863	39811144	20.5	4.64711	1.23674	3.75753	0.000171597	0.000576937
chr2	80556509	80557019	94	4.647	0.679274	6.84113	7.85708e-12	1.2902e-10
chr3	6532156	6532480	27.5	4.64655	1.12021	4.14793	3.35488e-05	0.000134447
chrX	120218962	120219756	109.75	4.64588	0.716837	6.48108	9.10691e-11	1.19305e-09
chr17	73631618	73632234	86.75	4.64496	0.682456	6.80625	1.00177e-11	1.60313e-10
chr14	38676958	38677849	86.5	4.64167	0.680633	6.81963	9.12724e-12	1.47165e-10
chr7	17598462	17599017	200.5	4.64072	0.540566	8.58492	9.08973e-18	4.53003e-16
chr20	22699958	22700367	60	4.63963	0.789573	5.87612	4.19994e-09	3.96795e-08
chr14	75153008	75153482	73.75	4.63825	0.7509	6.17692	6.53642e-10	7.22963e-09
chr9	97751981	97752573	119.75	4.63461	0.623875	7.42875	1.09627e-13	2.62173e-12
chr14	54312931	54313557	231	4.63254	0.489656	9.46081	3.05567e-21	2.58222e-19
chr22	24404803	24405933	112.25	4.63168	0.616666	7.51085	5.87464e-14	1.49346e-12
chr8	37477949	37478774	125.5	4.63145	0.595764	7.77396	7.60707e-15	2.27467e-13
chr21	37346818	37347552	138.75	4.63065	0.579765	7.98712	1.38129e-15	4.6802e-14
chr17	72416280	72416667	53	4.62946	0.827799	5.59249	2.23833e-08	1.8134e-07
chr2	20328781	20329878	197.75	4.62931	0.515313	8.9835	2.62292e-19	1.65422e-17
chr8	37741080	37741592	73.75	4.62911	0.767581	6.03077	1.63176e-09	1.67003e-08
chr3	86619357	86620031	105.75	4.6289	0.639376	7.2397	4.49663e-13	9.45309e-12
chr1	19711186	19711940	99.25	4.62849	0.657991	7.03427	2.00313e-12	3.67613e-11
chr17	3869519	3870464	79.25	4.62769	0.707218	6.54351	6.00931e-11	8.14706e-10
chr5	16923536	16923985	39.75	4.62713	0.928768	4.982	6.29296e-07	3.73524e-06
chr19	33807315	33807873	119.25	4.62651	0.628571	7.36036	1.83409e-13	4.18494e-12
chr22	23775452	23775970	80.75	4.62596	0.761915	6.07149	1.26732e-09	1.32302e-08
chr20	6469892	6470572	66.5	4.62581	0.7775	5.9496	2.68795e-09	2.63254e-08
chr2	136099184	136099771	53	4.62576	0.83377	5.548	2.8895e-08	2.27542e-07
chr11	61376678	61377364	119.5	4.62538	0.638185	7.24771	4.2387e-13	8.94604e-12
chr12	125152184	125152757	105.75	4.62314	0.652306	7.08738	1.36671e-12	2.59045e-11
chr7	75586162	75587097	209.75	4.62237	0.502041	9.20715	3.34887e-20	2.39792e-18
chr9	99406450	99407006	79	4.62233	0.708822	6.52115	6.97711e-11	9.35826e-10
chr6	6230447	6230943	59.75	4.62153	0.810254	5.7038	1.17166e-08	1.00482e-07
chr4	185546897	185547447	79	4.62078	0.711921	6.49058	8.55089e-11	1.12434e-09
chr17	17437190	17437651	92.25	4.61985	0.679256	6.80134	1.03651e-11	1.65132e-10
chr6	13829136	13829783	94	4.61742	0.738404	6.25325	4.02004e-10	4.65227e-09
chr9	93710320	93710841	177	4.61647	0.544668	8.47575	2.33568e-17	1.09032e-15
chr11	85539043	85539874	280.25	4.61635	0.45628	10.1174	4.62757e-24	5.75217e-22
chr17	46886313	46887026	124.25	4.61541	0.599299	7.70135	1.34641e-14	3.90588e-13
chr6	47198211	47198726	202	4.61413	0.50528	9.13181	6.73607e-20	4.70644e-18
chr1	234626657	234627333	170.25	4.61285	0.555829	8.29904	1.04956e-16	4.3236e-15
chr11	86716180	86716607	40.25	4.60784	0.977043	4.7161	2.40403e-06	1.25161e-05
chr6	1054695	1055848	221.5	4.60764	0.510937	9.01802	1.91527e-19	1.23711e-17
chr1	149150983	149151637	85.25	4.60693	0.708797	6.49965	8.05047e-11	1.06378e-09
chr2	10509402	10510270	104	4.60668	0.63473	7.2577	3.9372e-13	8.40933e-12
chr8	17601696	17602120	66	4.60631	0.792815	5.81008	6.24438e-09	5.68832e-08
chr13	74167423	74167937	119.25	4.60406	0.678473	6.78592	1.15352e-11	1.82144e-10
chr3	126519995	126520603	65	4.60358	0.758811	6.06683	1.30458e-09	1.35812e-08
chr8	120238588	120239089	78	4.60271	0.711372	6.47019	9.78817e-11	1.27216e-09
chr17	73574303	73575361	149.75	4.60093	0.584952	7.86547	3.67705e-15	1.16295e-13
chr3	62904218	62904945	91	4.60033	0.678801	6.77714	1.22578e-11	1.92842e-10
chr2	168691524	168692136	52	4.60025	0.831438	5.53288	3.15006e-08	2.46066e-07
chr14	69196160	69196886	175.25	4.59967	0.550801	8.35087	6.77624e-17	2.88598e-15
chr20	60551842	60552570	142.25	4.59952	0.5701	8.06791	7.15144e-16	2.55255e-14
chr3	69331262	69331627	86.5	4.59877	0.764464	6.01569	1.79126e-09	1.8202e-08
chr7	155603560	155604671	135.75	4.59671	0.584848	7.85967	3.85159e-15	1.21277e-13
chr13	99142384	99142982	97.5	4.59216	0.680783	6.74541	1.52592e-11	2.34537e-10
chr16	66666398	66666813	40	4.59192	0.98634	4.65552	3.23172e-06	1.6372e-05
chr1	214129467	214130156	78	4.59157	0.733251	6.26193	3.80239e-10	4.41821e-09
chr16	74885684	74886243	71	4.58775	0.743451	6.17089	6.79086e-10	7.48395e-09
chr8	78000610	78001186	58.5	4.58775	0.816545	5.61849	1.92637e-08	1.58102e-07
chr7	16850091	16850658	154.5	4.58767	0.569289	8.0586	7.71758e-16	2.74546e-14
chr8	48911395	48911898	103	4.5869	0.647824	7.08047	1.43663e-12	2.70857e-11
chr18	3456535	3457244	83.5	4.58651	0.689323	6.65364	2.85926e-11	4.16423e-10
chr10	72611920	72612367	32.25	4.58621	1.00287	4.57309	4.80579e-06	2.34103e-05
chr7	24211414	24212130	107.25	4.58538	1.50629	3.04416	0.00233327	0.00579726
chr9	80449817	80450350	121.75	4.58363	0.604503	7.58248	3.39015e-14	9.15409e-13
chr2	42319146	42319788	83.5	4.5834	0.69579	6.58733	4.47815e-11	6.2211e-10
chr17	43482554	43484798	248.75	4.58118	0.478801	9.56803	1.08966e-21	9.95596e-20
chr17	41392591	41393635	487.5	4.58063	0.446377	10.2618	1.04749e-24	1.38243e-22
chr19	42303311	42303935	162.5	4.58038	0.616877	7.4251	1.12691e-13	2.692e-12
chr4	118821856	118822350	77.25	4.57977	0.729187	6.28066	3.37141e-10	3.96266e-09
chr20	8769389	8770050	57.5	4.57654	0.793857	5.76494	8.16861e-09	7.25872e-08
chr17	17442813	17443379	38.5	4.57598	0.937986	4.87852	1.06886e-06	6.03597e-06
chr22	35775056	35775562	77.25	4.57286	0.742502	6.15872	7.33337e-10	8.01982e-09
chr17	80659966	80660767	78	4.57223	0.769492	5.94188	2.81765e-09	2.74824e-08
chr15	45626432	45627236	76.75	4.57201	0.726101	6.29665	3.04139e-10	3.60849e-09
chr15	51580415	51581300	122.5	4.57044	0.65631	6.96385	3.31099e-12	5.85033e-11
chr1	94047491	94047937	70.25	4.57002	0.748171	6.10826	1.00724e-09	1.07031e-08
chr3	191991340	191991681	44.75	4.56898	0.88701	5.15099	2.5911e-07	1.67365e-06
chr6	1630941	1631815	116.5	4.56891	0.681428	6.7049	2.01538e-11	3.0259e-10
chr2	40927177	40927774	120.5	4.56841	0.604905	7.55228	4.27707e-14	1.13595e-12
chr8	81191660	81192218	109	4.56659	0.667669	6.8396	7.94151e-12	1.30143e-10
chr6	167861533	167862070	63.5	4.56456	0.769061	5.93524	2.93415e-09	2.85276e-08
chr19	51865820	51866547	120.25	4.56434	0.607459	7.51382	5.74265e-14	1.46513e-12
chr1	167059615	167060008	57	4.56341	0.795042	5.73984	9.47658e-09	8.30455e-08
chr18	22358791	22359395	89	4.56291	0.689939	6.6135	3.75333e-11	5.31894e-10
chr6	56386204	56386721	44.5	4.562	0.885695	5.15076	2.59429e-07	1.67469e-06
chr14	54820489	54821283	120	4.56151	0.606951	7.51545	5.6716e-14	1.4522e-12
chr19	49238119	49238960	108	4.56129	0.649686	7.02076	2.2066e-12	4.02535e-11
chr17	76170099	76171240	113.5	4.55959	0.616633	7.39434	1.42108e-13	3.3234e-12
chr6	43771799	43772699	177.25	4.55753	0.560193	8.13564	4.09781e-16	1.52103e-14
chr18	56456207	56457017	119.5	4.55664	0.603927	7.54501	4.5227e-14	1.19083e-12
chrX	17028299	17028871	50.75	4.556	0.847251	5.3774	7.55702e-08	5.46765e-07
chr7	83651751	83652571	169.5	4.55596	0.536089	8.49852	1.92024e-17	9.08291e-16
chr10	29017136	29017814	63.5	4.55565	0.785092	5.80269	6.52584e-09	5.9346e-08
chr19	55833920	55834482	76.5	4.55517	0.749514	6.07749	1.22078e-09	1.2788e-08
chr3	127534694	127535849	167	4.55411	0.632625	7.19875	6.07655e-13	1.24522e-11
chr15	98120210	98120739	57	4.55393	0.811336	5.61288	1.98981e-08	1.62872e-07
chr6	43236998	43238620	206.75	4.55342	0.505014	9.01642	1.94341e-19	1.25151e-17
chr14	24080672	24081195	63	4.55226	0.770867	5.90538	3.51834e-09	3.37319e-08
chr2	197765326	197765966	64	4.55197	0.810924	5.61332	1.98484e-08	1.62527e-07
chr8	55330918	55331708	144.25	4.55072	0.573149	7.93985	2.02433e-15	6.6431e-14
chr11	74991282	74992322	132.5	4.55056	0.611658	7.43972	1.00898e-13	2.43477e-12
chr19	46369874	46370596	88.25	4.54912	0.69319	6.56259	5.28809e-11	7.25205e-10
chr9	87734085	87734797	150	4.54824	0.558846	8.13862	3.99804e-16	1.48916e-14
chr4	101151874	101152443	138	4.54792	0.588755	7.72464	1.12167e-14	3.27615e-13
chr2	85980597	85981202	50.25	4.54782	0.837876	5.42779	5.70559e-08	4.23155e-07
chr9	100834630	100835671	310.75	4.54512	0.442653	10.2679	9.83134e-25	1.32198e-22
chr14	68428720	68429502	126.5	4.54475	0.642426	7.07436	1.5014e-12	2.82322e-11
chr1	21960133	21961459	138	4.54346	0.600025	7.57213	3.67154e-14	9.84913e-13
chr8	82555930	82556452	83.75	4.54322	1.45829	3.11544	0.0018367	0.00470172
chr1	170082237	170082899	106.25	4.54241	0.638496	7.11424	1.1253e-12	2.18321e-11
chr12	66972136	66972675	31.5	4.54227	1.01713	4.46576	7.97838e-06	3.69216e-05
chr2	171570847	171572507	319	4.54152	0.484628	9.37114	7.17549e-21	5.70305e-19
chr17	61509624	61510236	118.25	4.5403	0.606349	7.48792	6.99733e-14	1.7477e-12
chr8	61149331	61149718	103.25	4.53946	1.5073	3.01164	0.00259842	0.00636943
chr20	24881113	24881927	106.5	4.53752	0.657464	6.90155	5.14371e-12	8.81896e-11
chr14	102930833	102931641	43.75	4.53696	0.887457	5.11232	3.18231e-07	2.01534e-06
chr14	68438797	68439563	93.25	4.53547	0.663656	6.83407	8.25361e-12	1.34704e-10
chr16	82010933	82011704	99.25	4.53303	0.647747	6.99814	2.59374e-12	4.67574e-11
chr6	129431855	129432389	94.5	4.53302	0.709862	6.38578	1.70531e-10	2.1284e-09
chr12	114203823	114204320	50	4.53278	0.850726	5.32813	9.92272e-08	6.99927e-07
chr1	234952904	234953464	44	4.53236	0.906051	5.00232	5.66447e-07	3.39138e-06
chr15	50116147	50116760	69.5	4.53183	0.789931	5.73699	9.63724e-09	8.42028e-08
chr3	167695812	167696351	117.5	4.5313	0.605599	7.48235	7.3004e-14	1.8107e-12
chr13	73677090	73677751	102.25	4.5295	1.50668	3.00629	0.0026446	0.00647225
chr1	223173894	223174487	117.25	4.52921	0.603065	7.51032	5.89852e-14	1.49775e-12
chr5	109236781	109237563	44.75	4.52892	0.944226	4.79644	1.61514e-06	8.74883e-06
chr14	84869775	84870354	69.5	4.52871	0.795438	5.69336	1.24564e-08	1.06145e-07
chr9	376117	376453	37.5	4.52849	0.952847	4.75259	2.00828e-06	1.06253e-05
chr15	93160506	93161215	186	4.52825	0.546843	8.28072	1.22432e-16	4.95758e-15
chr7	77108767	77109440	92.5	4.52469	0.661547	6.83956	7.9437e-12	1.30143e-10
chr1	201029086	201029555	68	4.52461	0.745646	6.06803	1.29486e-09	1.34979e-08
chr16	82067319	82067971	86.25	4.52432	0.675282	6.69991	2.08554e-11	3.11157e-10
chr8	68649687	68650166	86.25	4.52238	0.6795	6.65545	2.82434e-11	4.11619e-10
chr2	173194570	173195313	197	4.52197	1.6263	2.78053	0.00542709	0.0121067
chr13	106556568	106557174	123	4.52169	0.599396	7.54374	4.56671e-14	1.20094e-12
chr22	40362916	40364074	147.25	4.51955	0.563002	8.02759	9.94023e-16	3.46692e-14
chr20	10680230	10681082	80	4.51703	0.705078	6.40643	1.48965e-10	1.88565e-09
chr8	113824976	113825811	116.75	4.51698	0.617793	7.31148	2.64206e-13	5.8536e-12
chr15	101979598	101980076	67.75	4.51625	0.751496	6.00968	1.85892e-09	1.8818e-08
chr13	69425185	69425520	31	4.51614	1.02226	4.41778	9.97181e-06	4.53418e-05
chr7	73959151	73959812	287.5	4.51613	0.565143	7.99114	1.33699e-15	4.53728e-14
chr9	89350188	89351386	213.5	4.51609	0.490385	9.20928	3.28322e-20	2.36347e-18
chr10	106002829	106003250	37.25	4.51537	0.958021	4.71322	2.43831e-06	1.26716e-05
chr17	80661871	80662499	87	4.51484	0.72124	6.25983	3.85406e-10	4.47096e-09
chr12	51793728	51794120	43.25	4.51465	0.89666	5.03497	4.77923e-07	2.91251e-06
chr7	47510162	47510981	61.5	4.51309	0.779385	5.79058	7.01423e-09	6.33562e-08
chr19	49105342	49105938	122	4.5118	0.594189	7.5932	3.12089e-14	8.49995e-13
chr2	9276879	9277921	474.75	4.51072	0.41574	10.8498	1.99758e-27	3.74634e-25
chr6	52647664	52648057	75	4.5101	0.780424	5.77903	7.51304e-09	6.73496e-08
chr6	39182930	39184134	160.25	4.50815	0.597767	7.54165	4.64048e-14	1.21734e-12
chr11	116298583	116299120	105.5	4.50651	0.695165	6.48265	9.0123e-11	1.18283e-09
chr2	67116373	67116972	43.25	4.50406	0.912209	4.93753	7.9119e-07	4.59914e-06
chr19	42408211	42409461	514.5	4.50371	0.404878	11.1236	9.62824e-29	2.03814e-26
chr17	60240954	60242036	332.75	4.50357	0.438833	10.2626	1.03867e-24	1.38243e-22
chr6	52999361	52999954	79	4.5032	0.69601	6.47002	9.79906e-11	1.27281e-09
chr11	69294185	69295624	516.25	4.50262	0.428294	10.5129	7.53132e-26	1.15841e-23
chr9	75549171	75549710	117	4.50262	0.658733	6.83526	8.18546e-12	1.33898e-10
chr10	77796603	77797120	68.5	4.50238	0.805343	5.59063	2.26241e-08	1.83188e-07
chr1	15516339	15516731	43	4.50115	0.904605	4.97581	6.49745e-07	3.84811e-06
chr11	61522024	61522501	42.75	4.5007	0.89313	5.03924	4.67374e-07	2.85254e-06
chr11	57933022	57933456	55	4.49781	0.82037	5.48266	4.18967e-08	3.19569e-07
chr8	95204061	95204599	85	4.49661	0.689394	6.52255	6.91207e-11	9.2885e-10
chr15	47719592	47720138	174.5	4.49373	0.524435	8.5687	1.04655e-17	5.14375e-16
chr8	53886010	53886620	120.5	4.49325	0.595311	7.54773	4.42913e-14	1.17052e-12
chr11	46963698	46964131	66.75	4.49316	0.754777	5.95296	2.63331e-09	2.58257e-08
chr12	57443734	57444234	120.5	4.48739	0.610057	7.35569	1.89946e-13	4.32027e-12
chr1	183058016	183058620	149.75	4.48678	0.549213	8.16947	3.09737e-16	1.18465e-14
chr6	106431647	106432174	79.75	4.48614	1.45775	3.07745	0.0020878	0.00526195
chr17	71782145	71782820	79.25	4.48598	0.740145	6.06095	1.35317e-09	1.40441e-08
chr18	11887571	11888009	139.75	4.48471	0.622814	7.20072	5.9897e-13	1.23016e-11
chr17	56471906	56472472	131.75	4.48467	0.576592	7.77789	7.37438e-15	2.21438e-13
chr14	90323373	90323779	61.25	4.48344	0.821211	5.45955	4.77339e-08	3.5897e-07
chr3	141064471	141065526	120	4.48283	0.606261	7.39423	1.42232e-13	3.3234e-12
chr11	12251037	12251407	90	4.48181	0.668393	6.70536	2.00916e-11	3.01868e-10
chr4	99606671	99607128	66.25	4.4815	0.756407	5.92472	3.12833e-09	3.02504e-08
chr10	4100038	4100482	72.75	4.48146	0.752389	5.9563	2.58011e-09	2.53506e-08
chr3	58681770	58682318	77.75	4.47962	0.697047	6.42656	1.30524e-10	1.66404e-09
chr19	35711254	35712128	108.5	4.47903	0.651705	6.87279	6.29572e-12	1.06153e-10
chr11	71254594	71255155	36.5	4.47777	0.97059	4.61345	3.96047e-06	1.96424e-05
chr2	110432780	110433832	274	4.47742	0.468095	9.5652	1.11986e-21	1.01883e-19
chr6	52589997	52591037	226	4.47643	0.486546	9.20043	3.56514e-20	2.54076e-18
chr2	104727242	104728001	101.5	4.47605	0.637844	7.01747	2.25927e-12	4.10044e-11
chr4	3781829	3782777	83.75	4.47546	0.688704	6.49838	8.11903e-11	1.07151e-09
chr21	27277526	27277982	48	4.47495	0.850845	5.25942	1.4451e-07	9.82083e-07
chr1	23043492	23043890	77.75	4.47484	0.707034	6.32903	2.46703e-10	2.99518e-09
chr2	219902676	219903321	102.5	4.47371	0.675694	6.62091	3.56997e-11	5.07824e-10
chr11	121330238	121330691	89.5	4.47365	0.668555	6.69152	2.20866e-11	3.27925e-10
chr11	86522902	86523629	166.25	4.47348	0.531613	8.41492	3.93175e-17	1.75859e-15
chr8	37455831	37456518	119.75	4.47247	0.624283	7.16417	7.82594e-13	1.56665e-11
chr6	41395166	41396533	197.25	4.47215	0.540383	8.27589	1.27503e-16	5.11448e-15
chr16	85456302	85456869	144.75	4.47167	0.62158	7.19405	6.28982e-13	1.28317e-11
chr8	99848494	99849076	71.75	4.46924	0.737431	6.06056	1.35652e-09	1.4072e-08
chr19	56075496	56076295	83.25	4.46882	0.684298	6.53051	6.55452e-11	8.85813e-10
chr4	115484472	115485387	195.25	4.46809	0.507678	8.80104	1.35559e-18	7.79102e-17
chr11	72492962	72493837	153.75	4.46661	0.54613	8.17867	2.86998e-16	1.1036e-14
chr14	44918191	44918949	77.25	4.46658	0.704807	6.33731	2.33814e-10	2.85165e-09
chr1	192976888	192977399	114.25	4.4662	0.662845	6.73792	1.60667e-11	2.45537e-10
chr2	231964923	231965411	65.25	4.46346	0.749082	5.95858	2.54442e-09	2.50344e-08
chr3	30625318	30625818	97.75	4.4598	1.51541	2.94296	0.0032509	0.00777018
chr1	90528473	90528706	24.75	4.45698	1.16923	3.81191	0.000137899	0.000474256
chr14	69421956	69422563	83	4.45688	0.700501	6.36241	1.98606e-10	2.45729e-09
chr3	169150228	169151350	169.75	4.4521	0.527154	8.44555	3.02619e-17	1.38248e-15
chr7	807269	808461	82.5	4.45208	0.692082	6.43288	1.25208e-10	1.60009e-09
chr11	2013804	2014365	53	4.45193	0.808541	5.50613	3.66815e-08	2.82817e-07
chr16	88575410	88576117	259.75	4.45119	0.514489	8.65168	5.0745e-18	2.64617e-16
chr4	71048164	71048946	99.75	4.45004	0.639359	6.96016	3.39891e-12	6.00072e-11
chr11	116064441	116065289	94	4.4499	0.656954	6.77354	1.25671e-11	1.97128e-10
chr13	109600580	109601128	158	4.44783	0.549563	8.0934	5.8023e-16	2.09504e-14
chr17	63607255	63608162	87.75	4.44731	0.663192	6.70592	2.00137e-11	3.01121e-10
chr19	36221605	36222749	111.25	4.44726	0.615817	7.22172	5.13333e-13	1.06761e-11
chr3	47466092	47467040	105.25	4.44655	0.623539	7.13116	9.95301e-13	1.95764e-11
chr2	28432034	28432581	117	4.44586	0.606011	7.33627	2.19621e-13	4.92707e-12
chr1	1071745	1073496	403	4.44534	0.440234	10.0977	5.65593e-24	6.90993e-22
chr11	116316652	116317725	128.75	4.44475	0.592685	7.49935	6.41353e-14	1.61129e-12
chr18	11994177	11995567	372.25	4.44389	0.429105	10.3562	3.92266e-25	5.70521e-23
chr2	73258895	73259864	107.5	4.44312	0.701275	6.33577	2.36152e-10	2.87852e-09
chr4	115482767	115483745	148.25	4.44141	0.628927	7.06189	1.6425e-12	3.06429e-11
chr3	14098978	14099554	110.75	4.4413	0.614237	7.2306	4.80852e-13	1.00593e-11
chrX	106176798	106177247	59.75	4.44053	0.834138	5.3235	1.01791e-07	7.16123e-07
chr19	39212520	39213218	99	4.43907	0.639248	6.9442	3.80603e-12	6.659e-11
chr2	222392418	222393126	129.5	4.43829	0.630175	7.04294	1.88219e-12	3.46608e-11
chr21	44763904	44764720	52.75	4.43541	0.825403	5.37364	7.71645e-08	5.56981e-07
chrX	11773814	11774193	30	4.43486	1.06534	4.16287	3.1427e-05	0.000126632
chr1	46438815	46439370	81.75	4.43461	0.701089	6.32533	2.527e-10	3.06277e-09
chr19	35879071	35881074	381.5	4.43362	0.430217	10.3055	6.65209e-25	9.25002e-23
chr4	154140047	154140631	93	4.43344	0.658984	6.72768	1.72385e-11	2.61639e-10
chrX	46179237	46180371	162.25	4.43103	0.550492	8.04922	8.33222e-16	2.93481e-14
chr4	77598753	77599191	35	4.43099	0.955167	4.63897	3.50147e-06	1.75855e-05
chr2	45615667	45616317	75.25	4.42965	0.702589	6.30475	2.88657e-10	3.45162e-09
chr1	202041302	202042035	127	4.42962	0.579612	7.64239	2.13223e-14	6.02207e-13
chr3	184893114	184893803	150.75	4.4274	0.574463	7.70703	1.28782e-14	3.74098e-13
chr10	26655768	26656608	132.5	4.42688	0.570767	7.75601	8.76431e-15	2.5989e-13
chr4	89111219	89111767	81	4.42631	0.690235	6.41276	1.42904e-10	1.81322e-09
chr17	57367297	57368304	185.25	4.42548	0.54306	8.14916	3.66461e-16	1.37939e-14
chr4	62238365	62238953	87.25	4.42537	0.693308	6.38298	1.73676e-10	2.16261e-09
chr9	74381422	74382140	121.75	4.42233	0.622865	7.09999	1.24767e-12	2.39454e-11
chr15	43419954	43421314	167.5	4.4215	0.558662	7.91443	2.48384e-15	8.05833e-14
chr1	5658016	5658510	40.5	4.42147	0.898038	4.92347	8.50214e-07	4.90491e-06
chr6	5782876	5783515	92.25	4.4214	0.659528	6.70389	2.02941e-11	3.04269e-10
chr2	234318203	234319442	126.5	4.4209	0.587382	7.52645	5.21376e-14	1.34789e-12
chr16	68758651	68759122	29.75	4.42082	1.06842	4.1377	3.50807e-05	0.000139669
chr18	3617736	3618689	214.5	4.42058	0.544973	8.11157	4.99709e-16	1.83255e-14
chr12	71543663	71544211	75.75	4.41828	0.745277	5.92838	3.0594e-09	2.96375e-08
chr3	28100661	28101217	41	4.41756	0.929215	4.75408	1.99353e-06	1.05604e-05
chr3	71257402	71258078	161.25	4.41755	0.562772	7.84964	4.17244e-15	1.30419e-13
chr6	44062306	44063868	206	4.4142	0.509811	8.6585	4.77994e-18	2.51094e-16
chr11	105612135	105612782	120	4.41336	0.591788	7.45766	8.80733e-14	2.14955e-12
chr16	81309190	81309831	92	4.41276	0.670201	6.58423	4.57242e-11	6.3315e-10
chr14	90979895	90980666	100.25	4.41248	0.736788	5.9888	2.11398e-09	2.11497e-08
chr7	101228117	101228677	126	4.41101	0.598039	7.37578	1.63389e-13	3.77242e-12
chr16	9081093	9081810	86.25	4.40984	0.690704	6.38455	1.71904e-10	2.14303e-09
chr19	52191071	52191792	74.5	4.4098	0.713792	6.17799	6.49237e-10	7.19206e-09
chrX	112094470	112095094	86.5	4.40879	0.70199	6.28042	3.37654e-10	3.96433e-09
chr2	65623410	65624083	80	4.40852	0.68971	6.39184	1.639e-10	2.05162e-09
chr6	10250994	10251574	68.75	4.40416	0.744348	5.9168	3.28264e-09	3.15855e-08
chr17	42061023	42061722	198.5	4.40397	0.504253	8.73365	2.46588e-18	1.36229e-16
chr16	88555632	88556323	62.75	4.40389	0.755529	5.82889	5.57977e-09	5.14205e-08
chr3	84273360	84273926	91.75	4.40334	1.5071	2.92173	0.00348091	0.0082471
chr7	52608670	52609489	138.25	4.40233	0.626845	7.02299	2.17163e-12	3.96832e-11
chr13	106835996	106836608	136.25	4.40225	0.571658	7.70085	1.35169e-14	3.91588e-13
chr1	150985360	150985867	57.5	4.40216	0.805865	5.46265	4.6909e-08	3.53263e-07
chr1	165879974	165880939	194	4.40155	0.542522	8.11313	4.93318e-16	1.81222e-14
chr1	3049121	3049540	23.5	4.40109	1.1571	3.80357	0.000142628	0.000488371
chr11	68598612	68599074	74.75	4.39928	1.46334	3.00633	0.00264423	0.00647207
chr21	40322496	40323244	135.75	4.39915	0.565282	7.78223	7.12566e-15	2.14682e-13
chr12	93413944	93414782	154.5	4.39847	0.594245	7.40178	1.34372e-13	3.16396e-12
chr1	52442621	52443258	68.25	4.39702	0.737587	5.96136	2.50144e-09	2.46683e-08
chr10	116259283	116259967	124.25	4.39699	0.580822	7.57029	3.72394e-14	9.97718e-13
chr7	96863471	96864140	51.5	4.39692	0.832808	5.27964	1.2944e-07	8.90992e-07
chr11	487890	488227	29.5	4.39614	1.08346	4.05749	4.96034e-05	0.000190194
chr14	84448110	84448725	57.25	4.39604	0.805653	5.4565	4.85613e-08	3.64551e-07
chr6	30090939	30092057	96.25	4.39583	0.644233	6.82336	8.89363e-12	1.43941e-10
chr9	97370385	97371221	186.5	4.39461	0.525148	8.36833	5.84385e-17	2.52918e-15
chr1	36866507	36866918	51.25	4.39435	0.825351	5.32422	1.01385e-07	7.13735e-07
chr1	178008889	178009514	74	4.39401	0.726253	6.05026	1.44616e-09	1.49439e-08
chr1	3208587	3210407	148.5	4.39327	0.606148	7.24786	4.23412e-13	8.94521e-12
chr8	57911713	57912025	81.75	4.39281	0.783899	5.60379	2.09711e-08	1.70544e-07
chr10	81118485	81118911	91.75	4.39219	0.706525	6.21661	5.08004e-10	5.75577e-09
chr1	2035986	2036890	124	4.39129	0.58812	7.46666	8.22557e-14	2.01677e-12
chr9	140682798	140683950	169	4.39106	0.535189	8.2047	2.31161e-16	8.98585e-15
chr7	157667682	157668336	113	4.39053	0.617011	7.1158	1.11262e-12	2.16057e-11
chr17	10701497	10702424	123.75	4.38976	0.584298	7.51287	5.78433e-14	1.474e-12
chr18	26977534	26977884	87	4.38662	0.763716	5.74378	9.25867e-09	8.12604e-08
chr18	10196990	10197569	163	4.38628	0.544564	8.05467	7.96939e-16	2.81629e-14
chr7	75513668	75514044	34.25	4.38567	0.975887	4.49403	6.98869e-06	3.27959e-05
chr6	149085559	149086389	91.5	4.38443	0.71456	6.13584	8.47108e-10	9.1563e-09
chr11	71358165	71358562	50.75	4.38344	0.820036	5.34542	9.02066e-08	6.41589e-07
chr7	112220856	112221687	187.5	4.38219	0.58301	7.51649	5.62673e-14	1.44417e-12
chr2	8592965	8593521	156.5	4.38215	0.537901	8.14675	3.73822e-16	1.39482e-14
chr2	27242776	27243695	89.75	4.38108	0.660148	6.6365	3.21212e-11	4.6277e-10
chr3	159115466	159116305	178.5	4.3793	0.517223	8.46695	2.51913e-17	1.16326e-15
chr4	38280822	38281693	129.75	4.37923	0.614909	7.12176	1.06557e-12	2.08053e-11
chr2	75067411	75067838	45	4.37755	0.86053	5.08704	3.637e-07	2.27233e-06
chr1	20272615	20273528	170	4.37746	1.62225	2.69839	0.00696767	0.0149838
chr17	10380758	10381429	95.25	4.37623	0.654479	6.68659	2.28432e-11	3.3775e-10
chr19	44272379	44273255	114.25	4.37515	0.690669	6.33465	2.37882e-10	2.89796e-09
chr10	63372020	63372567	56.25	4.37434	0.799348	5.47239	4.44018e-08	3.36277e-07
chr11	85491023	85491895	128.25	4.3743	0.583275	7.49955	6.40382e-14	1.61075e-12
chr4	80131234	80131832	89.25	4.37346	0.658905	6.63747	3.19122e-11	4.6038e-10
chr16	88570597	88572085	113.5	4.373	0.674071	6.48745	8.73014e-11	1.14721e-09
chr3	186462172	186462823	67	4.37267	0.732844	5.96671	2.42078e-09	2.39169e-08
chr8	102155873	102156525	123.25	4.37214	0.614642	7.11331	1.1329e-12	2.19198e-11
chr21	43736959	43737846	106.5	4.37128	0.645363	6.77338	1.25812e-11	1.97203e-10
chr17	43486377	43487245	72.5	4.37061	0.7133	6.1273	8.93807e-10	9.59799e-09
chr7	47586251	47587006	344.25	4.36957	0.451016	9.68827	3.38217e-22	3.37901e-20
chr8	63624665	63625375	95.5	4.36904	0.679682	6.42807	1.29234e-10	1.64859e-09
chr11	126300568	126301061	107.5	4.36844	1.54733	2.82321	0.00475455	0.010806
chr12	71834363	71835007	84.25	4.36804	0.707339	6.17532	6.60306e-10	7.29578e-09
chr2	219283493	219283980	89.25	4.36804	1.50877	2.8951	0.00379037	0.00887505
chr8	129057052	129057622	105.75	4.36693	0.630871	6.92207	4.45081e-12	7.70513e-11
chr2	68118725	68119236	73	4.36669	0.741754	5.88698	3.93324e-09	3.7336e-08
chr7	99620065	99620897	122	4.36579	0.592358	7.37018	1.70402e-13	3.91742e-12
chr8	19122771	19123146	61.5	4.36403	0.776383	5.62098	1.8988e-08	1.5596e-07
chr1	185226271	185227217	154.75	4.36354	0.543751	8.0249	1.01612e-15	3.53248e-14
chr5	75771243	75772183	116.5	4.36249	0.61094	7.14062	9.29096e-13	1.83417e-11
chr4	77603950	77604749	127.5	4.36197	0.593141	7.35402	1.92334e-13	4.36529e-12
chr10	30449427	30449978	67.25	4.36046	0.767539	5.68109	1.33841e-08	1.13238e-07
chr15	42431138	42432266	143.25	4.35989	0.553075	7.883	3.19617e-15	1.0245e-13
chr17	39060777	39061247	50	4.35974	0.824308	5.28896	1.23011e-07	8.50847e-07
chr6	47476300	47476855	147.75	4.35654	1.27416	3.41915	0.000628165	0.001825
chr6	43841883	43842409	150.75	4.35566	0.611653	7.12114	1.07036e-12	2.08393e-11
chr5	160061919	160062348	46	4.3554	0.941743	4.62482	3.74917e-06	1.87284e-05
chr17	26172388	26173146	110.25	4.35537	0.614555	7.08703	1.3702e-12	2.59476e-11
chr3	111305325	111306121	77.25	4.35471	0.696198	6.25499	3.97546e-10	4.60429e-09
chr14	95739525	95740291	99.25	4.35441	0.638812	6.81643	9.33334e-12	1.50035e-10
chr19	54367608	54368053	83	4.35404	0.690625	6.30449	2.89138e-10	3.45351e-09
chr4	120762658	120763051	45.75	4.35243	0.935001	4.655	3.23977e-06	1.64061e-05
chr20	18013586	18014240	93.5	4.3517	0.648438	6.71105	1.93231e-11	2.91551e-10
chr9	80422795	80423673	285.25	4.34849	1.06359	4.0885	4.34177e-05	0.000168776
chr6	45978993	45979672	197.5	4.34834	0.520573	8.35299	6.65558e-17	2.85163e-15
chr12	121418254	121419688	99	4.34675	0.648358	6.70425	2.02449e-11	3.03744e-10
chr11	19242502	19243152	60.5	4.34635	0.765091	5.68083	1.34042e-08	1.13319e-07
chr12	117528755	117529306	66	4.34593	0.742943	5.84961	4.92731e-09	4.59423e-08
chr6	41467010	41467318	66.25	4.34529	0.75505	5.75498	8.66534e-09	7.65241e-08
chr11	16981631	16982258	66.25	4.34501	0.755604	5.75039	8.904e-09	7.84697e-08
chr15	39712688	39713377	56.25	4.34491	0.850561	5.10829	3.25088e-07	2.0545e-06
chr10	63381208	63381737	82.25	4.34213	0.687761	6.31343	2.72914e-10	3.28542e-09
chr3	53217479	53217964	66	4.3418	0.751171	5.78004	7.46822e-09	6.7004e-08
chr14	88670437	88670886	49.5	4.34168	0.830763	5.22613	1.73097e-07	1.15759e-06
chr17	15855354	15855878	65.75	4.34062	0.742582	5.84531	5.05619e-09	4.7103e-08
chr2	123478324	123478866	114.5	4.33978	0.60394	7.18578	6.68268e-13	1.35556e-11
chr7	138102504	138102966	45.5	4.33883	0.943587	4.59823	4.26092e-06	2.10049e-05
chr13	91518748	91519272	95.5	4.33878	0.743951	5.83208	5.47423e-09	5.05568e-08
chr4	88305536	88306172	81.75	4.33822	0.676612	6.41168	1.43928e-10	1.82514e-09
chr17	77905291	77906050	135.75	4.33786	0.561295	7.7283	1.08994e-14	3.19656e-13
chr3	184821370	184822118	44	4.3349	0.877993	4.93728	7.9221e-07	4.60382e-06
chr4	56206105	56206778	54.5	4.33292	0.792233	5.46925	4.51947e-08	3.41677e-07
chr20	17629767	17630104	43.75	4.33252	0.86882	4.98667	6.14286e-07	3.65224e-06
chr2	67267193	67267869	99	4.33245	0.681489	6.35734	2.05277e-10	2.53689e-09
chr4	40548626	40548971	38.75	4.33215	0.938538	4.61585	3.91491e-06	1.94427e-05
chr19	35583267	35584193	97.5	4.3315	0.63112	6.86319	6.73375e-12	1.12387e-10
chr4	77121957	77122464	81.5	4.33096	0.682918	6.34184	2.27038e-10	2.77852e-09
chr1	159940718	159941204	119	4.33049	0.588796	7.35482	1.91182e-13	4.34375e-12
chr9	110254886	110255150	56.25	4.3304	0.874444	4.95218	7.33864e-07	4.30099e-06
chr5	6966237	6966864	59.75	4.32952	0.76287	5.67531	1.38438e-08	1.16665e-07
chr7	16854432	16855165	157.25	4.32892	0.557065	7.77094	7.79032e-15	2.32622e-13
chr11	67866805	67867450	100.75	4.32858	0.744018	5.81784	5.96135e-09	5.46074e-08
chr16	65159259	65160373	114.75	4.32633	0.645602	6.70124	2.06662e-11	3.08846e-10
chr11	66556893	66557575	92	4.32623	0.652747	6.62773	3.4089e-11	4.87507e-10
chr11	39563059	39564116	113.75	4.32613	0.61424	7.04306	1.88063e-12	3.46608e-11
chr21	42536456	42537571	222.75	4.32558	0.530488	8.15397	3.52179e-16	1.33267e-14
chr20	9310510	9311379	155	4.32555	0.650222	6.65242	2.88309e-11	4.19323e-10
chr22	45669246	45669886	87.5	4.32543	0.701976	6.16179	7.19265e-10	7.88206e-09
chr11	41803030	41803381	55	4.32449	0.830756	5.20549	1.93484e-07	1.2819e-06
chr13	21134483	21135329	162.75	4.32366	0.56906	7.5979	3.00978e-14	8.21827e-13
chr11	67864472	67865045	109.5	4.32278	0.669248	6.45916	1.05286e-10	1.36013e-09
chr20	23249516	23250007	76.5	4.32181	0.735769	5.87387	4.25725e-09	4.01677e-08
chr3	181568658	181569322	166.25	4.3199	0.525371	8.22258	1.9917e-16	7.82766e-15
chr17	21217773	21218241	54.5	4.31908	0.817326	5.28441	1.26113e-07	8.69775e-07
chr1	22213316	22213796	44.75	4.31712	0.941337	4.58616	4.5147e-06	2.21386e-05
chr9	140062571	140063195	55	4.31633	0.844805	5.10926	3.23428e-07	2.04461e-06
chr18	12038899	12039294	75.75	4.3154	0.719405	5.99857	1.99061e-09	2.00373e-08
chr17	60242416	60243513	193.25	4.31355	0.528457	8.16254	3.28056e-16	1.25247e-14
chr9	71509413	71509994	92	4.31206	0.685481	6.29056	3.16317e-10	3.73433e-09
chr8	8937389	8937976	144.5	4.31175	0.561871	7.67392	1.66823e-14	4.75678e-13
chr9	114330460	114330875	64.75	4.31174	0.756026	5.70317	1.17601e-08	1.00815e-07
chr12	71556799	71557580	88.25	4.31156	1.53054	2.81703	0.00484703	0.0109963
chr2	173099678	173100069	91.25	4.31078	0.660982	6.52178	6.9478e-11	9.33065e-10
chr14	71848967	71849216	27.25	4.30859	1.06019	4.06398	4.8242e-05	0.000185573
chr8	121774331	121774880	91.75	4.30845	0.68467	6.29275	3.11893e-10	3.6882e-09
chr11	28364398	28365045	70.5	4.30838	0.757643	5.68656	1.29627e-08	1.10081e-07
chr2	234369163	234369857	43	4.30825	0.868411	4.96107	7.01059e-07	4.12172e-06
chr6	155903459	155904168	76	4.30623	0.748149	5.75584	8.62134e-09	7.623e-08
chr6	144664668	144665220	75	4.30619	0.708238	6.08014	1.20078e-09	1.26093e-08
chr12	26921897	26922471	86.25	4.3051	0.700661	6.14434	8.02944e-10	8.72304e-09
chr12	52077499	52078277	127.5	4.30456	0.571259	7.53521	4.87561e-14	1.26968e-12
chr12	49740242	49742037	323.75	4.30397	0.446355	9.64249	5.28874e-22	5.04791e-20
chr3	45815050	45815953	101	4.30313	0.621907	6.91926	4.54019e-12	7.83449e-11
chr17	64606507	64607178	85.75	4.30211	0.688539	6.24818	4.15267e-10	4.78879e-09
chr3	193571147	193572069	164.75	4.30058	0.54321	7.91697	2.43373e-15	7.90777e-14
chr12	76148857	76149524	80	4.30041	0.690701	6.22615	4.78024e-10	5.44204e-09
chr1	27240525	27241164	85	4.29856	0.667389	6.44086	1.18797e-10	1.52089e-09
chr11	69845885	69846831	116.5	4.29819	0.591544	7.26605	3.70152e-13	7.95362e-12
chr11	123461053	123461632	129.25	4.29778	0.64141	6.70053	2.07665e-11	3.10047e-10
chr1	163228132	163228676	48.25	4.29755	0.843918	5.09238	3.53594e-07	2.21631e-06
chr11	85845768	85846599	116.25	4.29467	0.592482	7.24862	4.21043e-13	8.91278e-12
chr11	111494355	111494926	58.5	4.2943	0.772061	5.56213	2.66502e-08	2.11343e-07
chr6	3870031	3870569	127	4.29412	0.5841	7.35168	1.95724e-13	4.43282e-12
chr10	112617999	112618567	111.25	4.29128	0.619843	6.92318	4.4162e-12	7.65761e-11
chr6	93536438	93536971	44	4.29112	0.944734	4.54215	5.56847e-06	2.67253e-05
chr10	22031690	22032108	48	4.28842	0.846876	5.06381	4.10968e-07	2.53798e-06
chr18	19571790	19572257	63.75	4.28778	0.75895	5.64963	1.60796e-08	1.3408e-07
chr12	102002003	102002598	163.75	4.28765	0.554721	7.72939	1.08059e-14	3.1735e-13
chr17	55498455	55498991	110.75	4.28717	0.613395	6.98924	2.76371e-12	4.94875e-11
chr1	164622046	164622660	117.25	4.28701	0.644344	6.65329	2.8661e-11	4.17136e-10
chr6	49354605	49355220	75	4.28668	0.748933	5.72371	1.04223e-08	9.0214e-08
chr7	1209430	1209847	48	4.2863	0.850468	5.03994	4.65684e-07	2.84385e-06
chr13	107129491	107130100	117	4.28291	0.646699	6.62273	3.52626e-11	5.03281e-10
chr19	1284124	1284694	63.5	4.28238	0.758407	5.64655	1.637e-08	1.3613e-07
chr11	28370586	28371149	115.5	4.28184	0.601294	7.12103	1.0712e-12	2.08393e-11
chr4	38663539	38664135	84.25	4.28122	0.677525	6.31892	2.63402e-10	3.17806e-09
chr17	80594367	80595084	63.25	4.28049	0.750794	5.70128	1.18913e-08	1.01816e-07
chr2	104852895	104853321	52.75	4.28038	0.802726	5.33231	9.69725e-08	6.85546e-07
chr19	40449666	40450601	116.25	4.28037	0.629641	6.79811	1.05999e-11	1.68621e-10
chr22	39317697	39318243	79.5	4.28029	0.714757	5.98845	2.11853e-09	2.11853e-08
chr19	2888789	2889224	21.75	4.27945	1.17629	3.63808	0.000274683	0.000875349
chr20	57883670	57884428	90.25	4.27888	0.697077	6.13831	8.34037e-10	9.02414e-09
chr9	129702013	129702604	116.75	4.27802	1.57703	2.71271	0.00667349	0.0144544
chr19	47693273	47694618	256.75	4.27745	0.49363	8.6653	4.50314e-18	2.37136e-16
chr17	46652323	46653064	136.25	4.27704	0.578145	7.39787	1.38385e-13	3.25129e-12
chr19	47561890	47562381	104.75	4.27696	0.62283	6.86698	6.55759e-12	1.09876e-10
chr11	117066005	117066275	26.75	4.27522	1.06987	3.99602	6.4416e-05	0.000241067
chr17	80526305	80526893	117.5	4.27489	1.58146	2.70312	0.00686914	0.0148091
chr1	92292513	92293400	125	4.2745	0.573525	7.45304	9.12161e-14	2.21614e-12
chr3	197286383	197286998	79.75	4.27435	0.736877	5.80063	6.60671e-09	6.00049e-08
chr6	169845722	169846308	63.25	4.27286	0.765953	5.57849	2.42619e-08	1.95007e-07
chr16	52485691	52486370	125.75	4.27122	0.606419	7.04336	1.87659e-12	3.46173e-11
chr17	73073096	73074275	79	4.27085	0.715319	5.97056	2.36448e-09	2.34039e-08
chr12	76353743	76354319	114.75	4.27011	0.606935	7.03552	1.98516e-12	3.64629e-11
chr8	96124806	96125289	119.5	4.26927	0.585718	7.28894	3.12394e-13	6.82225e-12
chr10	29127885	29128215	78.25	4.26779	0.691532	6.1715	6.76432e-10	7.45855e-09
chr1	77470695	77471339	57.5	4.26771	0.775416	5.50377	3.71758e-08	2.85906e-07
chr8	113826144	113826772	98.75	4.26641	0.631058	6.76073	1.37301e-11	2.13802e-10
chr7	17545692	17546084	72.75	4.26218	0.707581	6.02359	1.70586e-09	1.74005e-08
chr3	167774270	167775057	113.75	4.26165	0.5951	7.16124	7.99532e-13	1.59608e-11
chr22	18913097	18914212	77.75	4.26165	0.684282	6.22791	4.72704e-10	5.38721e-09
chr2	64633534	64633860	52.25	4.26163	0.812033	5.2481	1.53679e-07	1.03714e-06
chr19	51976264	51977033	62.75	4.26161	0.765542	5.56678	2.59486e-08	2.06776e-07
chr7	51715516	51715992	57.75	4.26133	0.799353	5.33098	9.76861e-08	6.89966e-07
chr9	129414378	129415084	207.5	4.26091	0.521317	8.17335	2.99939e-16	1.15129e-14
chr22	23880368	23880815	31.5	4.26087	0.987644	4.31418	1.60195e-05	6.92892e-05
chr6	107179157	107179814	89.25	4.26068	0.701423	6.07433	1.24505e-09	1.30295e-08
chr4	1015864	1016931	152.5	4.26064	1.62261	2.6258	0.00864461	0.0180085
chr8	73992750	73993580	140	4.26064	0.574224	7.41982	1.1728e-13	2.78915e-12
chr7	97833943	97834793	147.5	4.26048	0.631375	6.74794	1.49961e-11	2.30825e-10
chr18	9779486	9780137	300.25	4.25987	0.475818	8.95273	3.46805e-19	2.16171e-17
chr19	46742297	46742970	150	4.25884	0.557856	7.6343	2.2705e-14	6.38727e-13
chr14	65767430	65767878	57.5	4.25437	0.800713	5.31322	1.07702e-07	7.54234e-07
chr9	110349717	110350362	108.75	4.25424	0.629093	6.76249	1.35643e-11	2.1157e-10
chr1	78679904	78680591	124.75	4.25316	0.62281	6.82899	8.55127e-12	1.39031e-10
chr10	98507814	98508533	62.75	4.2521	0.784026	5.42341	5.84716e-08	4.33318e-07
chr11	74952765	74953115	26.75	4.25151	1.09742	3.87409	0.000107023	0.000378456
chr20	52417262	52417847	102.75	4.25012	0.618939	6.86679	6.56643e-12	1.09938e-10
chr10	133951522	133952030	36.75	4.24904	0.951495	4.46565	7.98266e-06	3.69334e-05
chr6	76234073	76234597	67.25	4.24862	0.74038	5.73843	9.55574e-09	8.35932e-08
chr4	187745998	187746739	72	4.24802	0.705547	6.02088	1.73469e-09	1.76776e-08
chr18	12005657	12006389	169	4.24732	0.529141	8.02681	1.0004e-15	3.48348e-14
chr8	137501425	137501836	56.75	4.24728	0.778301	5.45712	4.83918e-08	3.63533e-07
chr2	135169847	135170377	51.5	4.24641	0.801844	5.29581	1.18492e-07	8.22071e-07
chr10	115315408	115316001	97.5	4.24635	0.634426	6.69322	2.18306e-11	3.25026e-10
chr4	125348245	125348707	68.5	4.24516	0.799461	5.31003	1.09607e-07	7.66149e-07
chr14	74816482	74817376	107.5	4.24504	0.60891	6.97154	3.13494e-12	5.56919e-11
chr2	135153980	135154448	36.25	4.24495	0.929179	4.56849	4.91245e-06	2.38592e-05
chr2	231898738	231899321	67.25	4.24469	0.748442	5.67137	1.4166e-08	1.19287e-07
chr13	96206105	96206726	97.75	4.24372	0.650235	6.52643	6.73546e-11	9.07546e-10
chr6	40555164	40555931	76.75	4.24208	0.685787	6.18571	6.18227e-10	6.87347e-09
chr6	101351942	101352466	71.75	4.24203	0.707561	5.99529	2.03128e-09	2.03891e-08
chr9	128058964	128059686	188.25	4.24159	0.500458	8.47541	2.34255e-17	1.09115e-15
chr13	105041936	105042395	72	4.24075	0.721305	5.87927	4.12073e-09	3.89655e-08
chr16	70478251	70479094	51.75	4.24052	0.825258	5.13841	2.77068e-07	1.77622e-06
chr1	49517200	49517733	97.5	4.23912	0.65227	6.49904	8.08354e-11	1.06749e-09
chr2	43421895	43422384	72.25	4.23911	0.735424	5.76417	8.2061e-09	7.28598e-08
chr6	23728800	23729428	66.75	4.23812	0.739704	5.72948	1.0074e-08	8.75179e-08
chr1	64517340	64518273	101.75	4.23598	0.618274	6.85131	7.3179e-12	1.21378e-10
chr3	175059931	175060388	77.25	4.23556	0.721132	5.8735	4.26702e-09	4.0237e-08
chr14	100447011	100447484	36	4.23465	0.930032	4.55323	5.28283e-06	2.54844e-05
chr1	225416462	225416960	97.5	4.23315	0.666612	6.35024	2.14979e-10	2.64761e-09
chr19	49061167	49061956	354.75	4.23127	0.448387	9.43665	3.84877e-21	3.17709e-19
chr14	25504365	25505342	71.25	4.23126	0.708828	5.96938	2.38157e-09	2.35513e-08
chr16	65762033	65762466	56.25	4.22742	0.791925	5.33815	9.38976e-08	6.65627e-07
chr12	76384041	76384703	95	4.22641	1.54823	2.72983	0.00633667	0.0138299
chr13	27544694	27545093	67.75	4.22589	0.805869	5.2439	1.57221e-07	1.06004e-06
chr22	50922732	50922995	31	4.22585	1.00495	4.20502	2.61056e-05	0.00010752
chr10	106012632	106013381	96.25	4.22461	0.641389	6.58665	4.49854e-11	6.24133e-10
chr19	48857651	48858273	86.25	4.22443	0.670145	6.30375	2.90522e-10	3.46616e-09
chr12	115555979	115556523	46.5	4.22396	0.879162	4.80453	1.55119e-06	8.43662e-06
chr7	158383315	158383935	66	4.22337	0.736258	5.73627	9.67857e-09	8.44259e-08
chr18	7950412	7951113	221.75	4.22302	0.493511	8.55709	1.1575e-17	5.65009e-16
chr13	89740133	89740733	45.75	4.22234	0.842683	5.01059	5.42639e-07	3.26898e-06
chr10	3786502	3786807	43	4.2222	0.996608	4.23657	2.2696e-05	9.46628e-05
chr12	112211643	112212320	148.25	4.22099	0.614528	6.86868	6.47995e-12	1.08831e-10
chr4	147257544	147257902	51.25	4.2209	0.835427	5.05238	4.36331e-07	2.68299e-06
chr12	124723376	124723879	95.75	4.22083	0.631634	6.6824	2.35054e-11	3.46822e-10
chr7	121353034	121353462	67.25	4.2188	0.799195	5.27881	1.30026e-07	8.9474e-07
chr3	124938059	124938597	61.25	4.2186	0.781325	5.39929	6.69053e-08	4.90211e-07
chr17	56454631	56455513	116	4.21769	0.606565	6.9534	3.56584e-12	6.27987e-11
chr9	84271701	84272253	136.5	4.21754	0.590046	7.14781	8.81725e-13	1.74949e-11
chr9	87509707	87510085	51.75	4.21652	0.866892	4.86395	1.15067e-06	6.44518e-06
chr7	94448537	94449084	78.25	4.21645	1.5081	2.79587	0.00517603	0.0116365
chr2	173637144	173637877	90.5	4.21643	0.645293	6.53414	6.39749e-11	8.65685e-10
chr8	80992675	80993669	120.25	4.21542	0.578589	7.2857	3.2001e-13	6.96721e-12
chr18	19576441	19576989	93.5	4.21533	0.754401	5.58765	2.30163e-08	1.85904e-07
chrX	115361697	115362178	80.75	4.21497	0.687282	6.13281	8.63403e-10	9.30421e-09
chr14	44272325	44272800	51	4.21438	0.834571	5.04976	4.42364e-07	2.71229e-06
chr8	128577966	128578617	388.75	4.21361	0.484564	8.69567	3.44776e-18	1.84283e-16
chr7	17289561	17290165	90.75	4.21324	0.662934	6.35545	2.07824e-10	2.5654e-09
chr2	30009177	30009683	93.25	4.21252	0.752193	5.60032	2.13952e-08	1.73795e-07
chr8	108901565	108902002	50.75	4.2107	0.828591	5.08175	3.73965e-07	2.33101e-06
chr12	53335428	53336645	125	4.2105	0.576617	7.30207	2.83368e-13	6.24578e-12
chr7	47485584	47486384	141.5	4.20988	0.603872	6.97148	3.13625e-12	5.56919e-11
chr5	1882590	1882966	25.5	4.20968	1.0703	3.93318	8.38289e-05	0.000304754
chr3	88557755	88558277	55.25	4.20815	0.779219	5.40047	6.64675e-08	4.87505e-07
chr18	21189377	21190031	80	4.20794	0.67187	6.26303	3.77563e-10	4.3895e-09
chr14	100631749	100632128	35.5	4.20777	0.940853	4.47229	7.73866e-06	3.59289e-05
chr11	69516985	69517501	55.25	4.20698	0.781489	5.38329	7.31375e-08	5.30781e-07
chr15	31588664	31589537	129.5	4.20556	0.56772	7.40781	1.28399e-13	3.03668e-12
chr3	132022155	132022871	149.5	4.20514	0.548227	7.67044	1.71404e-14	4.87965e-13
chr1	75577999	75578589	36.5	4.20489	1.00006	4.20464	2.61503e-05	0.000107684
chr8	48385180	48385739	80.5	4.20467	0.700354	6.00364	1.92939e-09	1.94761e-08
chr6	11217470	11218011	70	4.20299	0.714269	5.88432	3.99695e-09	3.79125e-08
chr9	139949761	139950571	80	4.20278	0.683927	6.14507	7.99297e-10	8.69226e-09
chr2	121695452	121696338	109.25	4.20105	0.597862	7.02679	2.11343e-12	3.8686e-11
chr8	22497092	22497482	60	4.20036	0.75838	5.5386	3.04906e-08	2.38963e-07
chr13	111179736	111180369	74.75	4.19896	0.696117	6.03197	1.61973e-09	1.66011e-08
chr13	108672299	108672829	74.75	4.19819	0.697861	6.01579	1.79013e-09	1.81992e-08
chr8	1878518	1879320	79.75	4.19713	0.686391	6.11478	9.66873e-10	1.03225e-08
chr11	130051156	130052094	262.25	4.19675	0.469251	8.94349	3.77058e-19	2.33667e-17
chr11	1254532	1255466	50	4.19672	0.815176	5.14824	2.62942e-07	1.69431e-06
chr19	19712981	19713457	74.5	4.19608	0.691535	6.06778	1.29691e-09	1.35127e-08
chr3	154828636	154829136	55	4.19593	0.790193	5.31001	1.09619e-07	7.66149e-07
chrX	118126249	118126998	63.5	4.19494	1.4693	2.85505	0.00430298	0.00991354
chr7	36177024	36177272	30.25	4.1908	1.00645	4.16396	3.12772e-05	0.0001261
chr13	57102258	57102875	50	4.18931	0.828658	5.05554	4.29167e-07	2.64274e-06
chr3	69228291	69229336	167.5	4.18908	0.526811	7.95176	1.83881e-15	6.09517e-14
chr20	42999176	42999936	89	4.18837	0.653946	6.40476	1.50602e-10	1.903e-09
chr1	240443899	240444368	49.75	4.18819	0.817613	5.12246	3.01568e-07	1.92177e-06
chr13	104668121	104668811	115	4.18811	0.649783	6.44539	1.15301e-10	1.48057e-09
chr4	732499	733013	45.75	4.1876	0.900739	4.64907	3.33437e-06	1.68412e-05
chr2	98701308	98701594	30.25	4.18751	1.01086	4.14254	3.43478e-05	0.000137237
chr8	22769210	22770136	98.5	4.18729	0.620502	6.74823	1.49655e-11	2.30686e-10
chr15	58349757	58350177	60.75	4.18671	0.819233	5.11052	3.21272e-07	2.03159e-06
chr16	9097157	9097656	70.5	4.18662	0.770032	5.43695	5.42013e-08	4.03912e-07
chr1	168773155	168773520	79	4.18656	0.678824	6.16737	6.9433e-10	7.63228e-09
chr17	45962298	45963316	110.5	4.18584	0.678487	6.16938	6.85599e-10	7.55184e-09
chr7	12969036	12969543	99	4.18527	0.6447	6.49181	8.48122e-11	1.11655e-09
chr12	49318558	49319572	91	4.18518	0.735223	5.69239	1.25273e-08	1.06664e-07
chr11	129185668	129186400	265	4.18405	0.468591	8.92901	4.29837e-19	2.62569e-17
chr2	68667645	68668237	76.75	4.18356	1.51361	2.76397	0.00571035	0.0126502
chr17	79105602	79106097	79	4.18308	0.686909	6.08972	1.1311e-09	1.19658e-08
chr11	22174487	22175122	92	4.18236	1.55189	2.69501	0.00703867	0.0151228
chr9	99253297	99254299	123.25	4.18229	0.597108	7.00424	2.4833e-12	4.48799e-11
chr5	160314715	160315229	70	4.18223	0.758082	5.51686	3.45119e-08	2.68022e-07
chr17	11501487	11501880	44.75	4.18039	0.860634	4.85733	1.18977e-06	6.63986e-06
chr19	10851407	10852108	98.5	4.17976	0.63984	6.5325	6.46787e-11	8.74655e-10
chr4	21207148	21208033	92.75	4.17935	1.55772	2.68298	0.00729687	0.015582
chr7	105573457	105574005	156.75	4.17923	1.32024	3.1655	0.00154814	0.00404439
chr9	71354637	71355994	357.75	4.17741	0.458771	9.10566	8.57463e-20	5.91373e-18
chr12	29373691	29374547	179.25	4.17698	1.65643	2.52167	0.0116798	0.0233072
chr13	113622688	113623787	94.5	4.17664	0.691717	6.03807	1.55966e-09	1.60239e-08
chr11	113596679	113597165	29.75	4.17609	0.995019	4.197	2.70477e-05	0.000110942
chr1	12208220	12208734	98.25	4.17548	0.641196	6.51201	7.41501e-11	9.86514e-10
chr8	129909164	129909827	158	4.17519	0.586296	7.12129	1.06922e-12	2.08386e-11
chr4	11067942	11068578	30	4.17517	1.01199	4.1257	3.6961e-05	0.00014642
chr18	29620358	29621242	107.5	4.17517	0.603343	6.92005	4.51478e-12	7.79693e-11
chr8	86179150	86180410	313	4.17477	0.467803	8.92422	4.4885e-19	2.72625e-17
chr9	74658985	74659314	40	4.17474	0.918109	4.54711	5.43883e-06	2.61838e-05
chr6	43477799	43478961	383.5	4.17469	0.481412	8.67176	4.2548e-18	2.25726e-16
chr2	17760602	17761334	331.5	4.17231	0.454121	9.18765	4.0151e-20	2.8331e-18
chr13	24993771	24994292	49.5	4.17221	0.833496	5.00568	5.56662e-07	3.34028e-06
chr18	8612030	8612655	160.75	4.17176	0.532721	7.83104	4.83841e-15	1.50575e-13
chr2	234608748	234609235	54	4.17122	0.786764	5.30175	1.147e-07	7.98533e-07
chr14	44919342	44919982	64	4.17078	0.752695	5.54113	3.00527e-08	2.35962e-07
chr14	62779458	62780478	112	4.17075	0.593245	7.03039	2.05957e-12	3.77324e-11
chr14	93451014	93451568	44.5	4.16915	0.866172	4.81331	1.48451e-06	8.10699e-06
chr16	16121798	16122728	156	4.1689	0.549539	7.58617	3.29491e-14	8.9171e-13
chr4	102332287	102332874	44.25	4.16743	0.855326	4.87233	1.10292e-06	6.20374e-06
chr9	87877203	87877690	78	4.16674	0.681522	6.11388	9.72364e-10	1.03686e-08
chr9	137233119	137233687	109.25	4.16633	0.68514	6.08099	1.19439e-09	1.25546e-08
chr13	113248347	113249178	239.5	4.16596	1.19796	3.47755	0.000506015	0.00150719
chr6	47388071	47388734	227.75	4.16592	0.480698	8.6664	4.46003e-18	2.35689e-16
chr5	127220809	127221272	69.25	4.16433	0.762734	5.45973	4.76855e-08	3.58732e-07
chr4	45475851	45476282	59.25	4.16317	0.795842	5.23115	1.68462e-07	1.12977e-06
chr8	134621183	134621715	183.75	4.16301	0.506045	8.22657	1.92651e-16	7.58542e-15
chr8	95210499	95211231	553	4.16193	0.430924	9.65816	4.53945e-22	4.37178e-20
chr3	193557993	193558399	58.75	4.16188	0.774423	5.37417	7.69351e-08	5.557e-07
chr8	143701544	143702246	63.5	4.16178	0.747754	5.56571	2.61093e-08	2.07825e-07
chr16	68450153	68450666	68.75	4.16161	0.746663	5.57361	2.49517e-08	1.99875e-07
chr9	74742203	74743167	130.75	4.16047	0.571215	7.28355	3.25137e-13	7.06446e-12
chr14	79597917	79598489	44	4.1603	0.853646	4.87357	1.09601e-06	6.17626e-06
chr9	74356802	74357632	453.25	4.15963	0.477199	8.71678	2.86229e-18	1.55319e-16
chr22	31623851	31624318	72.75	4.15905	0.696692	5.96972	2.3766e-09	2.3513e-08
chr6	36618621	36619168	68.5	4.15869	0.741667	5.60722	2.05607e-08	1.6791e-07
chr1	179518347	179518727	44.25	4.15628	0.874367	4.75347	1.99951e-06	1.05884e-05
chr19	14184823	14185479	136.5	4.15626	0.605136	6.86831	6.49678e-12	1.09028e-10
chr20	22492716	22493467	120.5	4.15508	0.579768	7.16679	7.6774e-13	1.53836e-11
chr3	78724191	78724839	75.25	4.15405	1.5171	2.73816	0.00617844	0.0135357
chr6	41546581	41547225	101.5	4.15365	0.62648	6.63013	3.35383e-11	4.80599e-10
chr6	47150318	47150687	82.25	4.15275	0.675038	6.15188	7.65718e-10	8.34831e-09
chr4	184517388	184517911	58	4.15157	0.757632	5.47967	4.2613e-08	3.24107e-07
chr8	142324420	142325082	77.5	4.15107	0.696013	5.96407	2.46037e-09	2.42969e-08
chr5	179740604	179741103	39	4.14973	0.900937	4.60601	4.10461e-06	2.02764e-05
chr20	22483424	22484010	67.75	4.1494	0.727264	5.70548	1.16012e-08	9.95323e-08
chr22	39689552	39690253	77.75	4.14835	0.712771	5.82004	5.8834e-09	5.39859e-08
chr6	56375751	56376457	81.75	4.1481	0.664707	6.2405	4.36174e-10	5.0029e-09
chr15	39686040	39687126	115.25	4.14745	0.59288	6.99544	2.64428e-12	4.76283e-11
chr11	460222	461181	91.25	4.14663	0.640069	6.47842	9.26902e-11	1.21058e-09
chr14	78165676	78166492	106.5	4.14628	0.64286	6.44974	1.1204e-10	1.44302e-09
chr3	12520851	12522011	234	4.14617	0.46846	8.85064	8.70178e-19	5.1111e-17
chr18	8730241	8730833	179.75	4.14545	0.584473	7.09263	1.31584e-12	2.50737e-11
chr1	22586177	22586834	125.75	4.14504	0.615035	6.73952	1.58914e-11	2.43206e-10
chr17	70514896	70515691	106	4.14501	0.628317	6.597	4.19559e-11	5.87822e-10
chr3	19188114	19189910	239.25	4.14448	0.482964	8.58134	9.37718e-18	4.66242e-16
chr4	23789888	23790486	53	4.14395	0.787279	5.26363	1.41237e-07	9.62897e-07
chr5	76721760	76722290	38.75	4.14298	0.897095	4.61821	3.8706e-06	1.92629e-05
chr9	36316310	36317050	86.25	4.14258	0.653062	6.34331	2.2488e-10	2.75842e-09
chr8	112098824	112099515	129.75	4.14224	0.590759	7.01172	2.35409e-12	4.25807e-11
chr11	111173841	111174679	134.75	4.14173	0.592552	6.98964	2.7559e-12	4.9389e-11
chr3	181121993	181122733	105.5	4.14163	0.618844	6.69253	2.19338e-11	3.25882e-10
chr5	302046	302736	40	4.14148	0.968202	4.2775	1.89005e-05	8.0593e-05
chr4	124426198	124426535	39.5	4.14104	0.942653	4.39296	1.11817e-05	5.02449e-05
chr6	149212180	149212788	48.75	4.13963	0.852508	4.85583	1.19884e-06	6.68351e-06
chr2	20325748	20326249	62.5	4.13948	0.746132	5.54791	2.891e-08	2.27575e-07
chr3	169589140	169589681	128.75	4.13946	0.565752	7.31674	2.54072e-13	5.64663e-12
chr11	76480689	76481114	76.75	4.13927	0.690384	5.99561	2.02726e-09	2.03678e-08
chr17	4395995	4396854	91	4.13864	0.650048	6.36666	1.93186e-10	2.393e-09
chr6	128384121	128384479	64.75	4.13702	0.849208	4.87162	1.10688e-06	6.22272e-06
chr11	21696005	21696625	43.5	4.13606	0.867307	4.76885	1.85281e-06	9.8983e-06
chr9	116882434	116883115	135.25	4.13605	0.622839	6.64064	3.12328e-11	4.50882e-10
chr3	169107309	169107772	62.5	4.13494	0.755587	5.47249	4.43765e-08	3.36204e-07
chr6	83268205	83268687	33.75	4.13381	0.945209	4.37343	1.22308e-05	5.44439e-05
chr11	44622621	44623300	123.75	4.13377	0.580537	7.1206	1.07462e-12	2.08867e-11
chr1	162216954	162217469	86.5	4.13327	0.68578	6.02711	1.66922e-09	1.70592e-08
chr6	52920657	52921120	53	4.13288	0.808558	5.11142	3.19747e-07	2.02351e-06
chr2	11017166	11017569	48.25	4.13242	0.839084	4.92492	8.43956e-07	4.87275e-06
chr6	116281169	116281756	34.75	4.13203	1.00636	4.10589	4.02757e-05	0.000157926
chr12	69739363	69739846	57.5	4.13162	0.772643	5.34738	8.92343e-08	6.35943e-07
chr12	89900923	89901665	132.75	4.1313	0.558521	7.39685	1.39456e-13	3.27285e-12
chr10	19145490	19146022	34.75	4.13004	1.00908	4.09289	4.26024e-05	0.00016603
chr3	103933832	103934169	34	4.12998	0.966232	4.27432	1.91721e-05	8.16535e-05
chr8	2274768	2275280	137.25	4.12956	0.550192	7.50567	6.11142e-14	1.5463e-12
chr17	19651313	19652313	572	4.1279	0.408145	10.1138	4.79785e-24	5.89529e-22
chr14	43839401	43840100	57.5	4.1268	0.782263	5.27546	1.32423e-07	9.09523e-07
chr8	29140304	29140777	76.25	4.12665	0.697418	5.91704	3.27791e-09	3.15542e-08
chr13	99038964	99039491	76	4.12647	0.686653	6.00955	1.86038e-09	1.88239e-08
chr1	184394644	184395731	460.25	4.12585	0.451299	9.14216	6.12185e-20	4.30543e-18
chr2	197041524	197042215	66.75	4.12554	0.731983	5.63611	1.73935e-08	1.43803e-07
chr2	156908018	156908434	33.5	4.12515	0.942473	4.37695	1.20354e-05	5.36379e-05
chr3	182002528	182002969	67	4.12341	0.748133	5.5116	3.55593e-08	2.75029e-07
chr19	46745042	46745339	48	4.12309	0.84246	4.89411	9.87532e-07	5.6171e-06
chr22	40393919	40395794	258.5	4.12249	0.455109	9.05826	1.32547e-19	8.91152e-18
chr2	143288855	143289346	72.25	4.12204	0.755385	5.45687	4.84605e-08	3.63922e-07
chr11	12013815	12014782	310	4.12186	0.436018	9.45341	3.27969e-21	2.76062e-19
chr7	119890891	119891438	160	4.1215	0.524614	7.85625	3.95798e-15	1.24444e-13
chr15	89605776	89606291	71.25	4.12147	0.71277	5.78233	7.36728e-09	6.61817e-08
chr3	111257306	111257739	33.75	4.12055	0.964907	4.27041	1.95114e-05	8.29003e-05
chr2	151227808	151228306	71	4.11928	0.706133	5.83357	5.42536e-09	5.01488e-08
chr2	85750128	85750571	67	4.11921	0.7569	5.44222	5.26212e-08	3.92822e-07
chr15	37201023	37201675	67	4.11792	0.759574	5.42136	5.91483e-08	4.37575e-07
chr12	5892246	5892771	94.25	4.11783	0.631918	6.51641	7.20122e-11	9.61663e-10
chr15	31564484	31565365	68.25	4.11779	0.812718	5.06669	4.04794e-07	2.50419e-06
chr3	93969698	93970267	113.75	4.11731	0.622122	6.61817	3.63674e-11	5.16635e-10
chr11	112259141	112259903	133	4.11682	0.607867	6.77257	1.26513e-11	1.98013e-10
chr3	197317149	197317752	94.75	4.11636	0.655512	6.27961	3.3942e-10	3.97851e-09
chr8	128794696	128795199	123.25	4.11611	0.612967	6.71506	1.87986e-11	2.83837e-10
chrX	153009101	153009467	38.5	4.11598	0.925547	4.44707	8.70476e-06	4.00404e-05
chr8	23129365	23129931	44.25	4.11587	0.939323	4.38174	1.17735e-05	5.25947e-05
chr14	25433749	25434210	47.5	4.11522	0.829463	4.96131	7.00191e-07	4.11832e-06
chr2	67443846	67444372	39.25	4.11286	0.971261	4.23456	2.29001e-05	9.54024e-05
chr20	48526080	48526411	47.5	4.11275	0.833977	4.93149	8.16028e-07	4.72378e-06
chr1	94847811	94848319	80	4.11272	0.67337	6.10767	1.01097e-09	1.07375e-08
chr1	182089647	182090450	107.75	4.11212	0.59696	6.88843	5.64132e-12	9.6412e-11
chr2	29953218	29953566	48.25	4.11154	0.875604	4.69566	2.65742e-06	1.37103e-05
chr1	10819518	10820349	133.75	4.1106	0.64612	6.36198	1.99171e-10	2.46286e-09
chr12	2964292	2964554	33.25	4.11032	0.948959	4.3314	1.48164e-05	6.46079e-05
chr12	60145038	60145517	28.5	4.10995	1.00392	4.0939	4.24183e-05	0.000165403
chr15	37196200	37197065	75.25	4.10988	0.691456	5.9438	2.78484e-09	2.7212e-08
chr17	36049304	36049712	38.5	4.10819	0.937628	4.38147	1.17879e-05	5.26479e-05
chr4	95455645	95456315	195.5	4.10727	0.488904	8.40096	4.42832e-17	1.9602e-15
chr19	42153784	42154148	48	4.10671	0.87118	4.71397	2.42942e-06	1.26377e-05
chr3	183208387	183209871	285	4.10655	0.471179	8.71546	2.89573e-18	1.56736e-16
chr2	65258929	65259412	56.5	4.10627	0.772453	5.31589	1.06137e-07	7.44247e-07
chr10	26650253	26651073	84.25	4.10613	0.657793	6.24229	4.31207e-10	4.95124e-09
chr11	64656348	64657092	103.25	4.1055	0.630147	6.51514	7.26221e-11	9.69202e-10
chr17	75296279	75296783	104.25	4.10529	0.666643	6.15815	7.35975e-10	8.04456e-09
chr3	141805250	141806013	79.5	4.1031	0.674353	6.08449	1.16862e-09	1.23261e-08
chr19	2332438	2332928	29.25	4.10273	1.06071	3.86791	0.000109772	0.000387152
chr14	23075044	23075725	93.75	4.10217	0.651889	6.29275	3.11892e-10	3.6882e-09
chr4	175539092	175539589	47.5	4.1019	0.85345	4.80626	1.53779e-06	8.37871e-06
chr16	83177295	83178015	144.25	4.10054	0.551408	7.4365	1.03388e-13	2.48924e-12
chr17	77900973	77901540	71.25	4.10054	1.51164	2.71265	0.0066747	0.0144555
chr8	58633227	58634051	131	4.09866	0.595987	6.8771	6.10822e-12	1.03482e-10
chr1	218337446	218337741	47.5	4.09847	0.859502	4.76842	1.85677e-06	9.91203e-06
chr18	12693837	12694580	547	4.09767	0.412638	9.93042	3.06974e-23	3.50968e-21
chr10	5113410	5114446	220.5	4.09743	0.547345	7.486	7.10017e-14	1.76514e-12
chr6	169754846	169755505	56.75	4.09585	0.805599	5.08423	3.69129e-07	2.30221e-06
chr5	72900932	72901583	108.25	4.09554	0.658581	6.21874	5.01158e-10	5.69026e-09
chr1	68000188	68000688	33	4.09516	0.955778	4.28464	1.83035e-05	7.83911e-05
chr21	32608338	32609177	106.5	4.09459	0.597599	6.85173	7.29618e-12	1.21112e-10
chr17	49000116	49000390	33.25	4.09269	0.975027	4.19752	2.69854e-05	0.000110725
chr1	110927681	110928123	47	4.09253	0.843089	4.85421	1.2087e-06	6.73673e-06
chr17	77961633	77962639	244	4.09203	0.456836	8.95732	3.32668e-19	2.07966e-17
chr13	44792573	44793356	176.75	4.0919	0.548338	7.46237	8.49785e-14	2.07639e-12
chr19	42210723	42211138	83.5	4.0919	0.660435	6.19577	5.80025e-10	6.50285e-09
chr14	70514731	70515269	51.25	4.09169	0.79451	5.14996	2.60545e-07	1.68139e-06
chr17	45961456	45961939	47	4.09145	0.845026	4.8418	1.28666e-06	7.12107e-06
chr10	121656547	121657385	106.5	4.09082	0.608034	6.72794	1.72087e-11	2.61493e-10
chr7	51906658	51907208	38.75	4.09044	0.977748	4.18353	2.87021e-05	0.00011693
chr11	67638583	67639035	43.5	4.08878	0.943889	4.33184	1.47865e-05	6.45044e-05
chr22	24906618	24907468	129.25	4.08735	0.571039	7.15775	8.20134e-13	1.63568e-11
chr2	163438963	163439387	69.75	4.08654	0.721297	5.66554	1.4656e-08	1.23073e-07
chr6	41708819	41710554	564	4.08411	0.397987	10.2619	1.04623e-24	1.38243e-22
chr4	124171009	124171460	65.25	4.08406	0.749851	5.4465	5.13708e-08	3.84024e-07
chr17	63511783	63512536	89.25	4.08331	0.713747	5.72095	1.05931e-08	9.15814e-08
chr14	52773975	52774507	55.75	4.08327	0.77975	5.23665	1.63521e-07	1.09974e-06
chr2	230024798	230025352	69.25	4.08306	0.705396	5.78832	7.10951e-09	6.40815e-08
chr2	198228744	198229236	87.75	4.0828	0.655698	6.22664	4.76543e-10	5.42807e-09
chr11	76740850	76741304	116.75	4.08269	0.648744	6.29322	3.10948e-10	3.68111e-09
chr11	106338215	106338670	60.25	4.08252	0.753702	5.41663	6.07342e-08	4.48376e-07
chr4	57096162	57096523	38.5	4.08245	0.976174	4.18209	2.88836e-05	0.000117603
chr1	110490722	110491285	78.5	4.08134	0.681922	5.98505	2.16321e-09	2.15917e-08
chr7	149484541	149484952	42	4.08072	0.876274	4.6569	3.21014e-06	1.62861e-05
chr11	85524782	85525219	146.5	4.08029	0.534044	7.64035	2.16634e-14	6.11034e-13
chr12	95492060	95492863	146.5	4.08022	0.534265	7.63706	2.22237e-14	6.26013e-13
chr19	16373274	16374055	115	4.07935	0.597975	6.82194	8.98204e-12	1.45152e-10
chr6	136887070	136887707	69.75	4.07924	0.737345	5.53233	3.15999e-08	2.46662e-07
chr1	211840411	211841176	124.75	4.07904	0.604538	6.74736	1.50558e-11	2.31578e-10
chr4	79548949	79549390	51	4.07876	0.805898	5.06113	4.16776e-07	2.57262e-06
chr5	172264514	172265073	56	4.07793	0.803077	5.07788	3.81665e-07	2.37485e-06
chr21	36280623	36281475	241.75	4.07775	0.458185	8.89978	5.59555e-19	3.3417e-17
chr1	186132062	186132646	64.75	4.0777	0.739482	5.51426	3.50245e-08	2.71313e-07
chr7	834338	834988	87.5	4.07687	0.659998	6.17709	6.52921e-10	7.22539e-09
chr8	27180312	27180875	59.75	4.0748	0.744324	5.4745	4.38759e-08	3.32766e-07
chr1	25494732	25495268	51.75	4.07469	0.852421	4.78013	1.75179e-06	9.42693e-06
chr3	55664460	55665027	46.5	4.07359	0.84953	4.79512	1.62582e-06	8.80088e-06
chr15	63343112	63343998	132.5	4.07358	0.560945	7.26199	3.81423e-13	8.17935e-12
chr19	41372442	41372816	32.5	4.07227	0.957923	4.25114	2.12685e-05	8.93535e-05
chr13	110858439	110858948	65.25	4.07147	0.775992	5.24679	1.54772e-07	1.04386e-06
chr14	68631471	68632343	118.5	4.07143	0.57453	7.08654	1.37504e-12	2.60162e-11
chr10	11712322	11712759	42.5	4.06936	0.922843	4.40959	1.03568e-05	4.69329e-05
chr11	31705871	31706305	73.25	4.06874	0.695225	5.8524	4.84527e-09	4.52367e-08
chr10	81947169	81947806	46	4.06832	0.830824	4.89673	9.74432e-07	5.5526e-06
chr3	160993672	160994286	163.5	4.06791	0.518174	7.85048	4.14439e-15	1.29732e-13
chr1	100054576	100055122	65.75	4.06736	0.806085	5.04582	4.51572e-07	2.76478e-06
chr14	46262170	46262707	46	4.06703	0.833215	4.88112	1.05483e-06	5.9599e-06
chr16	81485671	81486277	73	4.0669	0.687728	5.91352	3.34873e-09	3.21924e-08
chr3	194378107	194378646	77.5	4.06598	0.673462	6.03744	1.5658e-09	1.60792e-08
chr16	19406796	19407542	86.75	4.06529	0.657206	6.18572	6.18177e-10	6.87347e-09
chr3	24547699	24548024	50.5	4.06493	0.805097	5.049	4.44138e-07	2.7216e-06
chr4	31986190	31986771	36.75	4.06432	0.90261	4.50285	6.7047e-06	3.15811e-05
chr13	110838713	110839092	46.75	4.06387	0.880016	4.61795	3.87558e-06	1.9275e-05
chr22	43283238	43284582	177.5	4.06321	0.533252	7.61969	2.5429e-14	7.06068e-13
chr9	116843035	116843605	68.5	4.06116	0.718886	5.64924	1.61155e-08	1.34327e-07
chr4	25864708	25865599	77.5	4.05956	0.68892	5.89264	3.80079e-09	3.62448e-08
chr4	26146769	26147285	91	4.05921	0.649454	6.25019	4.09951e-10	4.73514e-09
chr4	70624674	70625396	182.75	4.05909	0.560992	7.23555	4.63629e-13	9.72757e-12
chr5	173938472	173939609	296.25	4.05894	0.502778	8.07304	6.85684e-16	2.45149e-14
chr7	134103700	134104238	91.25	4.05844	0.661621	6.13408	8.56518e-10	9.23933e-09
chr7	101288168	101288659	68.5	4.05677	0.728685	5.56725	2.58794e-08	2.06302e-07
chr14	66219879	66220213	19	4.05569	1.22128	3.32086	0.000897418	0.00250578
chr7	900867	901341	63.5	4.05372	0.729648	5.55572	2.76462e-08	2.18351e-07
chr6	131264829	131265388	82.5	4.05225	1.55491	2.60609	0.0091583	0.0188941
chr2	148568806	148569345	103.75	4.05098	0.610922	6.63093	3.33588e-11	4.78666e-10
chr1	2506940	2507697	224.25	4.05037	0.472223	8.57725	9.71681e-18	4.80892e-16
chr6	158455224	158455634	76.75	4.05006	0.67737	5.9791	2.24376e-09	2.22916e-08
chr10	104417409	104418582	99.25	4.0499	0.622533	6.50552	7.74265e-11	1.02627e-09
chr18	46456370	46457134	154.25	4.04907	0.579632	6.98558	2.83682e-12	5.07542e-11
chr9	78988081	78988502	130.25	4.0482	0.560493	7.22258	5.10114e-13	1.06195e-11
chr1	114429866	114430786	131	4.04818	0.585969	6.90852	4.89753e-12	8.42105e-11
chr1	174922471	174923528	125.75	4.04777	0.567186	7.13659	9.56772e-13	1.88706e-11
chr19	47592617	47593160	123	4.04772	0.632669	6.39785	1.57578e-10	1.98177e-09
chr10	1474347	1474849	67.75	4.04648	1.50893	2.6817	0.00732498	0.0156311
chr12	75665359	75665861	54.25	4.04515	0.776771	5.20764	1.91257e-07	1.26793e-06
chr20	13070635	13071074	72.5	4.04498	0.715207	5.65568	1.55234e-08	1.30051e-07
chr4	38386718	38387846	187.75	4.04264	0.502883	8.03894	9.06226e-16	3.17105e-14
chr22	42238829	42239387	103.25	4.04246	0.614627	6.5771	4.79727e-11	6.62568e-10
chr5	146550159	146550773	67.75	4.04224	0.725166	5.57423	2.48622e-08	1.99233e-07
chr16	4703933	4704905	86.25	4.04144	0.69459	5.81845	5.93974e-09	5.44328e-08
chr11	91066901	91067222	63.5	4.04139	0.756333	5.3434	9.12205e-08	6.47938e-07
chr3	160701594	160702249	54.75	4.04123	0.810932	4.98344	6.24643e-07	3.70865e-06
chr12	71589115	71589694	121	4.04096	0.583902	6.92061	4.49689e-12	7.7723e-11
chr11	45943638	45944414	81	4.04094	0.675644	5.98087	2.21948e-09	2.20709e-08
chr9	110956393	110956816	76.25	4.04087	0.676321	5.97477	2.30415e-09	2.28385e-08
chr1	230340487	230340873	58.5	4.04075	0.7512	5.37906	7.48774e-08	5.42671e-07
chr18	9474571	9475872	881	4.03758	0.416038	9.70484	2.87534e-22	2.92737e-20
chr11	67466329	67467108	93.75	4.03721	0.623783	6.47214	9.66227e-11	1.25733e-09
chr1	200877254	200878194	116	4.03682	0.582971	6.92456	4.37323e-12	7.59401e-11
chr2	231570550	231571345	149.25	4.0344	0.61213	6.59075	4.37602e-11	6.09479e-10
chr16	19499095	19500056	87.75	4.03379	0.767555	5.25537	1.47729e-07	1.00109e-06
chr12	15933337	15933627	71.75	4.03348	0.706591	5.70837	1.14066e-08	9.80983e-08
chr1	112641662	112642284	59.75	4.03291	0.828312	4.86883	1.12263e-06	6.29971e-06
chr7	27299860	27300312	50	4.03216	0.839863	4.80098	1.57893e-06	8.56355e-06
chr4	161046724	161047568	106.75	4.03216	0.597429	6.74919	1.48677e-11	2.2951e-10
chr1	183145402	183146081	121	4.03144	0.610933	6.59882	4.14432e-11	5.81783e-10
chr10	134588758	134589404	71.5	4.03096	0.700516	5.75427	8.70146e-09	7.68114e-08
chr9	20356640	20357371	58.5	4.03063	0.772446	5.218	1.80863e-07	1.20575e-06
chr1	3339914	3340309	67.5	4.03055	0.739069	5.45355	4.93745e-08	3.70119e-07
chr2	214316241	214316710	76.75	4.03022	0.72374	5.5686	2.56793e-08	2.0508e-07
chr1	89554090	89554699	111.75	4.02966	0.617772	6.5229	6.89608e-11	9.27868e-10
chr17	43387785	43388514	129.75	4.02929	0.599247	6.72392	1.76901e-11	2.68237e-10
chr17	25431624	25432181	54	4.0288	0.796164	5.06027	4.18661e-07	2.58325e-06
chr7	107875487	107876158	98.25	4.02835	0.639955	6.29474	3.07921e-10	3.65133e-09
chr18	6947420	6948011	93.5	4.02815	1.57793	2.5528	0.0106861	0.0215781
chr18	54718634	54719136	59.5	4.02787	0.826405	4.87396	1.09382e-06	6.16716e-06
chr15	77465788	77466370	55	4.02686	0.850141	4.7367	2.17228e-06	1.14139e-05
chr2	19704638	19705592	137.75	4.02456	0.573413	7.01862	2.24076e-12	4.07722e-11
chr16	85015943	85016554	80	4.02392	0.672481	5.98369	2.18138e-09	2.17527e-08
chr8	124732047	124732610	107	4.0238	0.630027	6.38671	1.69493e-10	2.11915e-09
chr5	127090029	127090563	44.75	4.02364	0.840082	4.78958	1.67128e-06	9.01865e-06
chr11	1507152	1507714	71.25	4.02197	0.709468	5.66899	1.4364e-08	1.20811e-07
chr7	99751223	99753010	224.75	4.0212	0.480181	8.37434	5.55334e-17	2.40832e-15
chr3	52323410	52324090	93	4.02015	0.63754	6.30572	2.86848e-10	3.43383e-09
chr9	19201980	19203240	176.25	4.01954	0.514193	7.81718	5.40207e-15	1.65467e-13
chr8	129756854	129757585	113.75	4.01935	1.272	3.15987	0.0015784	0.00411689
chr18	20263051	20263806	114.5	4.01868	0.579294	6.93721	3.99909e-12	6.99105e-11
chr2	169258292	169258954	123	4.01866	1.30095	3.08902	0.00200815	0.00508217
chr6	44186365	44187470	114.5	4.01584	0.587634	6.83391	8.26324e-12	1.34758e-10
chr1	111644270	111645478	229.75	4.01497	0.513803	7.81422	5.53044e-15	1.69157e-13
chr4	77596048	77596668	79.5	4.01471	0.672389	5.97082	2.36071e-09	2.33774e-08
chr8	125672545	125672941	93	4.01404	0.653427	6.14306	8.09492e-10	8.78971e-09
chr14	50432981	50433500	101.5	4.01375	0.623768	6.43469	1.23729e-10	1.58214e-09
chr7	54627762	54628896	255.25	4.0131	0.575658	6.97133	3.13957e-12	5.57046e-11
chr8	96181349	96181629	44.75	4.01281	0.859769	4.66731	3.05167e-06	1.55456e-05
chr8	119890463	119891356	349.5	4.01181	0.423328	9.47683	2.62135e-21	2.25078e-19
chr1	19612346	19612876	93	4.01147	0.659976	6.07821	1.21528e-09	1.27429e-08
chr15	81131535	81131836	58.5	4.0107	0.812344	4.93719	7.92544e-07	4.60451e-06
chr11	38832688	38833376	84.25	4.01065	0.685646	5.84945	4.93206e-09	4.59666e-08
chr11	71318931	71319471	27	4.01046	1.03715	3.86681	0.000110266	0.000388512
chr10	5190053	5190932	173.5	4.0088	0.595295	6.73414	1.64902e-11	2.51111e-10
chr7	123541106	123541582	98.25	4.00628	0.695082	5.76375	8.22638e-09	7.30096e-08
chr10	80818678	80819404	83.75	4.00461	0.678994	5.89786	3.68249e-09	3.51795e-08
chr11	75062422	75063644	213.5	4.00358	0.486631	8.22715	1.9172e-16	7.56268e-15
chr1	235096068	235097161	294.75	4.00358	0.508331	7.87593	3.38229e-15	1.07609e-13
chr17	27276499	27277055	188.5	4.00334	0.533701	7.50108	6.32937e-14	1.5939e-12
chr19	49628047	49629105	162.25	4.00194	0.557924	7.17291	7.34194e-13	1.47668e-11
chrX	41271328	41271811	48.5	4.00083	0.816034	4.90277	9.44941e-07	5.39606e-06
chr11	76479569	76479947	76	4.00002	0.758458	5.27388	1.33569e-07	9.16171e-07
chr9	134420582	134421106	53	3.99887	0.801769	4.98756	6.1148e-07	3.63859e-06
chr19	49370360	49370887	75	3.99867	0.718576	5.56472	2.62576e-08	2.08875e-07
chr6	41418645	41419349	193	3.99676	0.555041	7.20084	5.98436e-13	1.23016e-11
chr13	76362714	76363205	113	3.99669	0.586175	6.81826	9.21501e-12	1.48468e-10
chr2	66212814	66213659	113.25	3.99622	0.597088	6.69286	2.18854e-11	3.25615e-10
chr12	65416124	65417078	74.5	3.99601	0.701914	5.69302	1.24809e-08	1.06311e-07
chr4	159748006	159748423	74	3.99495	0.680652	5.86929	4.37667e-09	4.12217e-08
chr12	53363471	53364319	61	3.99353	0.73277	5.44991	5.0396e-08	3.77132e-07
chr18	11688771	11689389	87	3.99343	0.647657	6.16597	7.00508e-10	7.69228e-09
chr6	11297016	11297373	36.5	3.99303	0.997485	4.0031	6.2519e-05	0.000234707
chr17	39939590	39939990	169.75	3.99282	0.544895	7.32768	2.34175e-13	5.22071e-12
chr14	68881688	68882203	40.25	3.99251	0.922281	4.32895	1.49822e-05	6.52648e-05
chr2	10630920	10631488	48.25	3.99224	0.818177	4.87943	1.06391e-06	6.0096e-06
chr18	11500359	11501288	237	3.99106	0.458283	8.70872	3.0732e-18	1.65088e-16
chr10	8658063	8658587	88.25	3.99083	0.706104	5.6519	1.58688e-08	1.32581e-07
chr12	94280056	94280917	129.75	3.99067	0.558695	7.14284	9.14223e-13	1.80815e-11
chr12	30915994	30916395	96.25	3.99016	0.660014	6.04556	1.48888e-09	1.53482e-08
chr2	148453862	148454593	133.75	3.98986	0.684513	5.82876	5.58406e-09	5.14378e-08
chr2	122582805	122583396	44	3.98862	0.859601	4.64008	3.48274e-06	1.7512e-05
chr2	219176832	219177538	134	3.98799	0.559309	7.13021	1.00214e-12	1.96929e-11
chr3	58652385	58653166	52.5	3.98799	0.79604	5.00978	5.44921e-07	3.28088e-06
chr2	85983934	85984516	96.25	3.98786	0.665858	5.98905	2.11074e-09	2.1137e-08
chr8	38624234	38624797	95.75	3.98749	0.647001	6.16304	7.13636e-10	7.82438e-09
chr1	17839585	17840060	74.25	3.98504	0.715991	5.56576	2.61009e-08	2.07825e-07
chr3	193560304	193562287	474.75	3.98484	0.490837	8.11845	4.72168e-16	1.73751e-14
chr6	1589321	1590150	60.75	3.98375	0.741118	5.37532	7.64451e-08	5.52721e-07
chr17	19648353	19651078	391	3.98282	0.429914	9.26422	1.96504e-20	1.45877e-18
chr18	9135827	9137094	461	3.98271	0.49187	8.09709	5.62892e-16	2.03977e-14
chr7	99606081	99606550	73.5	3.98219	0.687388	5.79321	6.90527e-09	6.24512e-08
chr9	74640313	74641259	254	3.98205	0.479969	8.29649	1.07233e-16	4.40894e-15
chr7	83779736	83780151	47.75	3.982	0.808737	4.92373	8.49087e-07	4.89973e-06
chr2	28473580	28474086	87.25	3.98065	0.690374	5.76593	8.12067e-09	7.21912e-08
chr2	219989436	219989826	39.25	3.97982	0.883294	4.50566	6.61681e-06	3.12083e-05
chr19	46580167	46580907	107.5	3.97963	0.596389	6.67288	2.50835e-11	3.68856e-10
chr12	89890939	89891307	47.75	3.97909	0.81443	4.88574	1.03043e-06	5.83591e-06
chr11	65374439	65374998	39.75	3.97862	0.9159	4.34395	1.39944e-05	6.12992e-05
chr13	37378646	37379055	83.75	3.97833	0.740245	5.37434	7.68646e-08	5.55379e-07
chr6	31681853	31682355	65.5	3.97568	1.52628	2.60482	0.00919234	0.0189556
chr14	37325191	37325635	52.5	3.97562	0.820383	4.84606	1.25939e-06	6.98282e-06
chr6	137280650	137281249	60.75	3.97388	0.762512	5.21157	1.87252e-07	1.24562e-06
chr11	34847199	34847949	113	3.97344	0.650412	6.10911	1.00185e-09	1.06618e-08
chr14	89921747	89922146	39.5	3.97265	0.910914	4.36117	1.29371e-05	5.71953e-05
chr4	118768854	118769416	90	3.97221	0.635768	6.24788	4.16054e-10	4.79527e-09
chr11	133826803	133827478	90.25	3.97203	0.647142	6.1378	8.36717e-10	9.04857e-09
chr4	69737422	69738013	64.75	3.97174	0.734461	5.40769	6.38433e-08	4.7008e-07
chr12	53382726	53383257	77.75	3.96962	0.702153	5.65349	1.5722e-08	1.31509e-07
chr22	25760092	25760983	75.25	3.9696	0.791754	5.01368	5.33975e-07	3.22133e-06
chr22	23862517	23864598	237.25	3.96952	0.540143	7.34901	1.99674e-13	4.5175e-12
chr4	139033908	139034565	73.75	3.9686	0.730858	5.43006	5.63342e-08	4.18203e-07
chr2	157045732	157046159	26.5	3.96822	1.05887	3.74759	0.00017854	0.000597277
chr13	113339399	113340035	73.75	3.96777	0.732739	5.41498	6.12939e-08	4.5204e-07
chr4	23062975	23063551	102.5	3.96775	0.608676	6.51865	7.09429e-11	9.47975e-10
chr17	17721271	17721831	39.75	3.96758	0.933883	4.24848	2.15228e-05	9.03206e-05
chr11	1123291	1123996	85.25	3.96544	0.642085	6.17588	6.57977e-10	7.27381e-09
chr10	135173152	135174185	85.25	3.96357	0.647031	6.12577	9.02433e-10	9.68576e-09
chr4	1332633	1333225	55.75	3.96293	0.767282	5.16488	2.40587e-07	1.56535e-06
chr6	131433347	131433761	43	3.96289	0.846134	4.68352	2.81986e-06	1.44612e-05
chr10	115511907	115512699	106.5	3.96255	0.605426	6.54507	5.94671e-11	8.07755e-10
chr2	67273750	67274227	73	3.96126	0.713244	5.55387	2.79417e-08	2.20522e-07
chr1	17922799	17924532	179.75	3.96087	0.557305	7.10718	1.18437e-12	2.28124e-11
chr4	14182666	14183249	110.75	3.96053	0.604104	6.55604	5.5257e-11	7.55367e-10
chr6	12364062	12364714	51.25	3.95935	0.782993	5.05669	4.26587e-07	2.62912e-06
chr4	8726855	8727464	48	3.95744	0.868955	4.55425	5.25737e-06	2.53731e-05
chr11	62676638	62677175	47	3.95713	0.812502	4.87031	1.11424e-06	6.25917e-06
chr15	101003682	101004132	65	3.95712	0.778221	5.08483	3.67952e-07	2.29621e-06
chr2	47306068	47306562	219.25	3.95633	0.471782	8.38593	5.03257e-17	2.20937e-15
chr19	38763933	38764795	93.75	3.95598	0.647595	6.10872	1.00433e-09	1.06793e-08
chr7	139941756	139942828	164.5	3.95596	0.632365	6.25581	3.95446e-10	4.58494e-09
chr9	115154414	115154831	47.25	3.95468	0.832101	4.75265	2.00773e-06	1.0625e-05
chr3	87491558	87491951	38.5	3.9534	0.881149	4.48665	7.23523e-06	3.38488e-05
chr2	123505759	123506721	177	3.9526	0.508112	7.77898	7.31092e-15	2.19842e-13
chr17	77469426	77470040	102	3.95244	0.630925	6.26452	3.73978e-10	4.35492e-09
chr14	92217114	92217571	72	3.95239	0.685859	5.76269	8.27842e-09	7.34105e-08
chr20	52682261	52682546	72	3.95093	0.689426	5.73075	9.99869e-09	8.69699e-08
chr7	66344959	66345446	61	3.94918	0.824787	4.78812	1.68351e-06	9.07779e-06
chr1	109680706	109681337	55.25	3.94898	0.768962	5.13547	2.81438e-07	1.80046e-06
chr17	64707885	64708891	118.25	3.94877	0.588868	6.7057	2.00448e-11	3.01377e-10
chr16	87033630	87034227	76	3.9486	0.671381	5.88131	4.07037e-09	3.85234e-08
chr15	39726914	39727564	89.25	3.94838	1.59087	2.4819	0.0130685	0.0256663
chr7	12841665	12842293	185.5	3.94622	0.526297	7.49809	6.47547e-14	1.62495e-12
chr10	126845172	126845960	98.25	3.94528	0.676551	5.83146	5.49453e-09	5.07223e-08
chr19	46907157	46908267	106	3.94517	0.634245	6.22027	4.96308e-10	5.63818e-09
chr7	26748120	26748550	63.5	3.94373	0.73313	5.37931	7.47729e-08	5.42097e-07
chr16	82620882	82621284	38.25	3.94361	0.881952	4.47145	7.76898e-06	3.60462e-05
chr5	170847240	170847750	46.75	3.94349	0.824037	4.78557	1.70499e-06	9.18435e-06
chr20	31319150	31320250	148.25	3.94247	0.588323	6.7012	2.06716e-11	3.08846e-10
chr1	171885308	171886011	155.25	3.94073	0.542575	7.26302	3.78545e-13	8.12579e-12
chr17	71794231	71794724	59.25	3.94032	0.756084	5.21148	1.87337e-07	1.24581e-06
chr1	22334911	22335769	146.5	3.94011	0.540368	7.29153	3.0646e-13	6.71324e-12
chr3	140676009	140676512	76.25	3.93893	0.706885	5.57224	2.51491e-08	2.01155e-07
chr19	41698510	41699354	274.5	3.93803	0.437791	8.99522	2.35753e-19	1.5091e-17
chr10	13149538	13150373	81	3.93785	0.720907	5.46235	4.69873e-08	3.53729e-07
chr18	13836461	13836994	152	3.93774	0.584601	6.73578	1.63053e-11	2.48472e-10
chr1	85926203	85926797	122.25	3.93767	0.607724	6.47937	9.21056e-11	1.20515e-09
chr1	234847845	234848242	54.75	3.93727	0.765605	5.1427	2.70823e-07	1.74036e-06
chr1	27303286	27303623	21.5	3.93627	1.11953	3.516	0.000438109	0.00132628
chr3	31135518	31135928	29.75	3.9355	0.976505	4.03019	5.57319e-05	0.000211605
chr8	129513420	129514037	146.5	3.93534	1.2065	3.26179	0.00110712	0.0030102
chr17	77866274	77866634	79.75	3.9342	0.674298	5.83452	5.39448e-09	4.99931e-08
chr11	71948938	71949488	58.75	3.93334	0.744127	5.28585	1.2512e-07	8.64036e-07
chr12	125585426	125586157	50.75	3.93315	0.807228	4.87242	1.10238e-06	6.20234e-06
chr12	112213283	112214236	163.25	3.93313	0.548702	7.16806	7.60678e-13	1.52564e-11
chr3	27386814	27387446	117.25	3.93234	0.599835	6.55571	5.5378e-11	7.56538e-10
chr2	110448137	110448779	141.5	3.93195	0.543093	7.23991	4.48969e-13	9.4478e-12
chr12	3653446	3654079	62.75	3.93187	0.720308	5.4586	4.79907e-08	3.60684e-07
chr3	150469518	150470247	104.75	3.93145	0.623488	6.30558	2.8712e-10	3.43516e-09
[truncated: 19,354 more rows]
